# Supplementary material for: iDRiP for the systematic discovery of proteins bound directly to noncoding RNA
Source: Springer Nature journal article supplement (doi:10.1038/s41596-021-00555-9), 2021-06-09
Supplement: MOESM2 [file 41596_2021_555_MOESM2_ESM15.xlsx]

## Sheet: protein_final
					Normalized_intensities								Log2_ratios
Reference	Entry	Uniprot_Gene_name	GeneName	Protein_description	TERRA_1	TERRA_2	Sense_1	Sense_2	Luciferase_1	Luciferase_2	U1_1	U1_2	TERRA_avg/Luciferase_avg	Sense_avg/Luciferase_avg	U1_avg/Luciferase_avg
sp|P70371|TERF1_MOUSE	P70371	TERF1_MOUSE	Terf1	Telomeric repeat-binding factor 1	283584	108401	16840.3	6671.94	2914.54	7470.69	7572.76	3760.01	5.23819	1.17888	0.125967
tr|E9Q1Z0|E9Q1Z0_MOUSE	E9Q1Z0	E9Q1Z0_MOUSE	4732456N10Rik	Protein 4732456N10Rik	272512	1279.46	221416	2616.01	4054.4	3524.08	4844.78	4427.4	5.17503	4.88566	0.291001
sp|Q5EE38|ACD_MOUSE	Q5EE38	ACD_MOUSE	Acd	Adrenocortical dysplasia protein	217017	130978	11335.7	10412	9017.1	3853.26	7591.13	5640.11	4.75694	0.756816	0.039896
sp|Q91WC1|POTE1_MOUSE	Q91WC1	POTE1_MOUSE	Pot1	Protection of telomeres protein 1	195142	144324	9639.57	9506.74	5758.57	7550.51	7947.56	6149.69	4.67279	0.524656	0.0830021
sp|Q6NZQ4|PAXI1_MOUSE	Q6NZQ4	PAXI1_MOUSE	Paxip1	PAX-interacting protein 1	227882	103383	12665.5	17232.8	11924.7	3531.94	7567.04	14251.8	4.42168	0.951831	0.497347
sp|Q0VGM9|RTEL1_MOUSE	Q0VGM9	RTEL1_MOUSE	Rtel1	Regulator of telomere elongation helicase 1	197231	134456	12162.6	14232.1	6561.06	9053.21	10830.1	7189.37	4.40889	0.757382	0.206695
sp|Q5SU73|COIL_MOUSE	Q5SU73	COIL_MOUSE	Coil	Coilin	153488	86460.8	14924	20719.1	10620.3	3904.62	43420	34385.4	4.04612	1.2951	2.42134
sp|Q8BHN5|RBM45_MOUSE	Q8BHN5	RBM45_MOUSE	Rbm45	RNA-binding protein 45	81880.9	89382.4	7707.15	10432.2	4782.64	6964.89	12366.9	12334.4	3.86579	0.626762	1.07223
sp|Q9QXG9|TINF2_MOUSE	Q9QXG9	TINF2_MOUSE	Tinf2	TERF1-interacting nuclear factor 2	204550	120229	19586.5	12776.1	7652.28	16222.1	12401.5	7047.14	3.76592	0.438861	-0.295798
sp|Q5SUQ9|CTC1_MOUSE	Q5SUQ9	CTC1_MOUSE	Ctc1	CST complex subunit CTC1	141804	130441	15605.7	17150.6	12660.6	7607.48	17065.8	16091.3	3.74762	0.692561	0.710107
sp|P49452|CENPC_MOUSE	P49452	CENPC_MOUSE	Cenpc	Centromere protein C	192737	83915.2	8189.43	26064	19367	6648.31	12804	24979.6	3.41064	0.396888	0.538402
sp|Q8K2X3|STN1_MOUSE	Q8K2X3	STN1_MOUSE	Obfc1	CST complex subunit STN1	149595	110588	11285.5	25244	17272	8399.15	13063.2	21100.8	3.34131	0.508915	0.41233
sp|E9Q5F9|SETD2_MOUSE	E9Q5F9	SETD2_MOUSE	Setd2	Histone-lysine N-methyltransferase SETD2	97617.5	79840	7489.85	7450.86	8389.35	9822.55	27814.8	36815.2	3.28452	-0.285633	1.82732
tr|H7BX60|H7BX60_MOUSE	H7BX60	H7BX60_MOUSE	Pot1b	Protein Pot1b	145221	135999	17376.5	16651.4	13523.6	16217.2	12527.9	11957.3	3.24119	0.19428	-0.28053
sp|Q64012|RALY_MOUSE	Q64012	RALY_MOUSE	Raly	RNA-binding protein Raly	90726.7	51947.1	12016.1	12898.9	8422.42	10188.8	26574.7	23643.6	2.93848	0.420843	1.43204
sp|Q9WU62|INCE_MOUSE	Q9WU62	INCE_MOUSE	Incenp	Inner centromere protein	194944	64351.8	19979.1	22417.2	18739.3	18230.5	27456.8	30104.9	2.81018	0.197589	0.638761
sp|P02089|HBB2_MOUSE	P02089	HBB2_MOUSE	Hbb-b2	Hemoglobin subunit beta-2	298354	11155.3	32585	15287	17124.2	30118.3	68385.3	8236.25	2.71183	0.0190984	0.697666
sp|Q80WQ8|M18BP_MOUSE	Q80WQ8	M18BP_MOUSE	Mis18bp1	Mis18-binding protein 1	141513	81049.6	11452.7	29607.2	23903.1	11106.7	17351.2	32450.5	2.66838	0.22997	0.508435
sp|Q9Z204-2|HNRPC_MOUSE	Q9Z204-2	HNRPC_MOUSE	Hnrnpc	Isoform C1 of Heterogeneous nuclear ribonucleoproteins C1/C2	96188.2	49875.1	14837.1	10766.5	8876.53	14916.7	29087.5	22875.9	2.61797	0.105794	1.12694
sp|Q61687|ATRX_MOUSE	Q61687	ATRX_MOUSE	Atrx	Transcriptional regulator ATRX	113432	87348.7	19517.8	38161.1	22817.8	10903.7	14714.7	32737.6	2.57388	0.774374	0.49281
sp|Q8BHX3|BOREA_MOUSE	Q8BHX3	BOREA_MOUSE	Cdca8	Borealin	145842	52432.2	30911	37562.4	26361	13378.1	31536	31984.5	2.31887	0.784986	0.676665
tr|A3KGI3|A3KGI3_MOUSE	A3KGI3	A3KGI3_MOUSE	Casc5	Protein CASC5	93645.9	75161.2	14358.5	38093.9	27842.1	8191.53	21831.9	39595.4	2.22796	0.541663	0.769535
sp|P28659|CELF1_MOUSE	P28659	CELF1_MOUSE	Celf1	CUGBP Elav-like family member 1	82564	58472.9	15602.9	29964.1	22665.8	10263	37077.2	46066.7	2.09865	0.468638	1.33626
sp|O88466|ZN106_MOUSE	O88466	ZN106_MOUSE	Znf106	Zinc finger protein 106	94818.3	49862.8	16373.2	26248.3	21024.4	12886.3	60394.4	52601	2.09306	0.32984	1.73645
sp|Q924W5|SMC6_MOUSE	Q924W5	SMC6_MOUSE	Smc6	Structural maintenance of chromosomes protein 6	65192.3	57688.7	17603.8	44128.1	25284.6	3606.83	39156.1	50039.6	2.08855	1.09537	1.62633
sp|Q9Z1N2|ORC1_MOUSE	Q9Z1N2	ORC1_MOUSE	Orc1	Origin recognition complex subunit 1	96360.9	74151.3	15879.1	33016.8	27157.6	13641.3	28633.1	41401.3	2.06327	0.261184	0.779532
sp|Q8C854|MYEF2_MOUSE	Q8C854	MYEF2_MOUSE	Myef2	Myelin expression factor 2	74618.9	51373.9	12681.1	22938.9	19369.7	11082.7	35110.9	42704.6	2.04872	0.226132	1.3535
sp|Q921F2|TADBP_MOUSE	Q921F2	TADBP_MOUSE	Tardbp	TAR DNA-binding protein 43	62917.1	59791.6	10421.4	29731.2	21554.8	8847.72	47738.6	61526.7	2.01298	0.401302	1.84557
sp|Q9D0E1|HNRPM_MOUSE	Q9D0E1	HNRPM_MOUSE	Hnrnpm	Heterogeneous nuclear ribonucleoprotein M	63868.6	55644.9	14276.7	26093.9	19156.1	10841.9	31678.7	42159.5	1.99424	0.428442	1.2995
sp|Q6KCD5|NIPBL_MOUSE	Q6KCD5	NIPBL_MOUSE	Nipbl	Nipped-B-like protein	118716	54173.8	19375.7	29558.6	21349.6	22669.4	36089.3	46318.3	1.97365	0.152719	0.904651
sp|Q07139|ECT2_MOUSE	Q07139	ECT2_MOUSE	Ect2	Protein ECT2	27884.3	79298.1	16932	69121	11360.2	16213.1	35524.4	25748.3	1.95872	1.64195	1.15197
sp|O70126|AURKB_MOUSE	O70126	AURKB_MOUSE	Aurkb	Aurora kinase B	121956	62118.9	19058.2	41291.8	32929	14554.1	23352.4	33418.7	1.95481	0.345942	0.257745
tr|F7BJB9|F7BJB9_MOUSE	F7BJB9	F7BJB9_MOUSE	Morc3	Protein Morc3	34922.9	87026.4	13863.9	50346.8	20560.1	11251.5	21299.6	41366.6	1.93866	1.01326	0.978137
sp|P70372|ELAV1_MOUSE	P70372	ELAV1_MOUSE	Elavl1	ELAV-like protein 1	95799.4	42342.2	23946.9	19398.7	15517.8	21614.3	43166.3	41331.9	1.89541	0.22322	1.18626
sp|Q60953|PML_MOUSE	Q60953	PML_MOUSE	Pml	Protein PML	101980	74708.4	37558.7	40025.1	22516.8	25787.4	29532.1	28714.7	1.87099	0.683608	0.270031
sp|Q8VEE4|RFA1_MOUSE	Q8VEE4	RFA1_MOUSE	Rpa1	Replication protein A 70 kDa DNA-binding subunit	88540.5	74560	32977.3	39552.5	26220.6	18437.9	22854.4	37001.8	1.86876	0.69964	0.422568
sp|P97329|KI20A_MOUSE	P97329	KI20A_MOUSE	Kif20a	Kinesin-like protein KIF20A	110102	58315.7	26263	32459.4	30029.6	17136.6	28266.8	44169.8	1.83622	0.316158	0.618967
sp|Q9JL70|FANCA_MOUSE	Q9JL70	FANCA_MOUSE	Fanca	Fanconi anemia group A protein homolog	45567.3	81817.5	23660.9	51059.8	29874.3	7781.15	15979.1	38813.2	1.75826	0.988649	0.541114
sp|Q60899|ELAV2_MOUSE	Q60899	ELAV2_MOUSE	Elavl2	ELAV-like protein 2	91195	38054.9	25410.4	19964.4	19631.8	19179	47301.6	34805.4	1.73563	0.225431	1.08105
sp|Q8C5L3|CNOT2_MOUSE	Q8C5L3	CNOT2_MOUSE	Cnot2	CCR4-NOT transcription complex subunit 2	46483.6	53877.3	24680.5	69379.3	5812.34	24407.9	65993.2	11231.2	1.73161	1.63806	1.35354
tr|A2A8V7|A2A8V7_MOUSE	A2A8V7	A2A8V7_MOUSE	Gm13247	Protein Gm13247	63144	73164.3	23802.8	43332.8	25269.2	16087.4	32278	41769	1.72068	0.698961	0.840322
sp|Q91ZA3|PCCA_MOUSE	Q91ZA3	PCCA_MOUSE	Pcca	Propionyl-CoA carboxylase alpha chain, mitochondrial	95737.4	42424.7	73822.6	43272.4	30969.9	10976.5	95951.6	5450.29	1.71974	1.48106	1.27347
sp|Q9R207|NBN_MOUSE	Q9R207	NBN_MOUSE	Nbn	Nibrin	79473	67008.2	21889.5	37310.6	30626.8	14510.8	24674.3	46028.5	1.69831	0.391268	0.647435
tr|Q8BGJ5|Q8BGJ5_MOUSE	Q8BGJ5	Q8BGJ5_MOUSE	Ptbp1	MCG13402, isoform CRA_a	63420.9	51415.2	19475.2	29087.1	22416.5	13359.6	38250.7	50828.3	1.68251	0.440845	1.31609
sp|O88291|ZN326_MOUSE	O88291	ZN326_MOUSE	Znf326	DBIRD complex subunit ZNF326	71124.1	49717	16747.8	25859.3	18121.2	20574	49269.5	60944.8	1.64289	0.138942	1.51009
sp|Q8BU00|IKZF5_MOUSE	Q8BU00	IKZF5_MOUSE	Ikzf5	Zinc finger protein Pegasus	140150	37371.5	25030.5	30114.3	21511.2	35357.9	47956.1	38861.1	1.64227	-0.0444197	0.610333
sp|Q3TYA6|MPP8_MOUSE	Q3TYA6	MPP8_MOUSE	Mphosph8	M-phase phosphoprotein 8	77883.6	42133.3	15705.7	23196.2	20241	19245.1	62800.4	66612.8	1.60382	-0.021507	1.71256
sp|Q8BG05|ROA3_MOUSE	Q8BG05	ROA3_MOUSE	Hnrnpa3	Heterogeneous nuclear ribonucleoprotein A3	82964	56248.3	21429	26112	20009.8	26225.8	41433.6	43804.9	1.59021	0.0401701	0.882502
sp|O88445|AURKC_MOUSE	O88445	AURKC_MOUSE	Aurkc	Aurora kinase C	86894.6	64618	15830.9	43095.6	38135.5	12476.8	15000.2	48022.6	1.58188	0.219428	0.316385
sp|Q9Z2X1|HNRPF_MOUSE	Q9Z2X1	HNRPF_MOUSE	Hnrnpf	Heterogeneous nuclear ribonucleoprotein F	54856.9	51479.6	15256	27752.2	23796.9	12216.8	35607	53213.4	1.56202	0.256068	1.30235
sp|Q8CH25|SLTM_MOUSE	Q8CH25	SLTM_MOUSE	Sltm	SAFB-like transcription modulator	45098.7	47725.1	14966	23368.1	21405.3	10896.9	53047.6	75480.8	1.52286	0.246994	1.99238
sp|O88491|NSD1_MOUSE	O88491	NSD1_MOUSE	Nsd1	Histone-lysine N-methyltransferase, H3 lysine-36 and H4 lysine-20 specific	38719.7	72119.9	16864.6	49122.7	21314.8	17807.9	38975.4	37826.2	1.5024	0.754183	0.973133
tr|G5E924|G5E924_MOUSE	G5E924	G5E924_MOUSE	Hnrnpl	Heterogeneous nuclear ribonucleoprotein L (Fragment)	63111.3	46643.7	20232.9	29564.3	25727.5	13414.3	42975.4	58421.1	1.48751	0.347354	1.37323
sp|Q69ZR9|F208A_MOUSE	Q69ZR9	F208A_MOUSE	Fam208a	Protein FAM208A	67571.2	48807.7	15301.8	30308.4	28592	13769.1	45252.6	62335.8	1.45801	0.106614	1.34471
sp|Q61464|ZN638_MOUSE	Q61464	ZN638_MOUSE	Znf638	Zinc finger protein 638	61131.9	38674.7	17164.4	27540.3	25354.5	12856.5	54430.5	73693.9	1.38515	0.226437	1.74548
sp|A2APB8|TPX2_MOUSE	A2APB8	TPX2_MOUSE	Tpx2	Targeting protein for Xklp2	74398.3	50590.7	25708.8	35170.8	28496.2	19507.2	46199.1	51996.7	1.38059	0.342819	1.03252
tr|E9PZM4|E9PZM4_MOUSE	E9PZM4	E9PZM4_MOUSE	Chd2	Chromodomain-helicase-DNA-binding protein 2	62725.2	46511.4	15612	29649.2	23769.8	18229.7	45109.3	66288.3	1.37901	0.1079	1.40727
sp|P01942|HBA_MOUSE	P01942	HBA_MOUSE	Hba	Hemoglobin subunit alpha	185097	11963.7	54611.4	16677.1	30516.3	45714.8	46598	9130.36	1.37019	-0.096712	-0.45197
sp|Q8BIX3|AL14E_MOUSE	Q8BIX3	AL14E_MOUSE	Arl14ep	ARL14 effector protein	56958.1	61973.6	68220.4	55028.8	26464.8	19931.6	18853.7	40575.8	1.35805	1.4095	0.357169
tr|G3UY19|G3UY19_MOUSE	G3UY19	G3UY19_MOUSE	Prc1	Protein regulator of cytokinesis 1	34506	67984.3	16298.7	47509.5	25278.4	14888.1	32653.3	53434.2	1.35142	0.667748	1.09981
sp|Q8BRB7|KAT6B_MOUSE	Q8BRB7	KAT6B_MOUSE	Kat6b	Histone acetyltransferase KAT6B	87787.5	61281.5	33132.1	26770.6	34270.5	24193.7	27772.4	46542.5	1.35036	0.0350687	0.346099
sp|Q7TSZ8|NACC1_MOUSE	Q7TSZ8	NACC1_MOUSE	Nacc1	Nucleus accumbens-associated protein 1	58949.4	72225.9	14068.2	35558.2	37776.3	13870.6	25150.5	44575.8	1.34474	-0.0575765	0.433021
sp|Q9EST5|AN32B_MOUSE	Q9EST5	AN32B_MOUSE	Anp32b	Acidic leucine-rich nuclear phosphoprotein 32 family member B	9303.54	89104.2	18838.2	58544	31353.9	7405.57	12696.4	48518.7	1.34422	0.997453	0.659341
sp|Q62193|RFA2_MOUSE	Q62193	RFA2_MOUSE	Rpa2	Replication protein A 32 kDa subunit	56116.2	73098.9	24977.6	44392.9	33767.8	17387.2	23843.5	46156.5	1.33683	0.439446	0.452478
sp|P32067|LA_MOUSE	P32067	LA_MOUSE	Ssb	Lupus La protein homolog	55874.9	42275.1	18475.1	28745.2	24158.9	14930	62774.1	66196.4	1.32822	0.272645	1.72221
sp|Q8CG46|SMC5_MOUSE	Q8CG46	SMC5_MOUSE	Smc5	Structural maintenance of chromosomes protein 5	65581.7	58607.1	22201.4	38424.5	31568.6	18004.2	36371.1	48068.4	1.32492	0.290387	0.768372
sp|Q922S8|KIF2C_MOUSE	Q922S8	KIF2C_MOUSE	Kif2c	Kinesin-like protein KIF2C	60565.6	72236.1	20375.2	44862.1	38292.4	15001.4	18157.1	38300.9	1.31723	0.291728	0.0832079
sp|Q80YR5|SAFB2_MOUSE	Q80YR5	SAFB2_MOUSE	Safb2	Scaffold attachment factor B2	71171.8	32186.7	15428.3	24445.6	19759.3	21838.6	83982	68655.8	1.31307	-0.061063	1.87553
sp|Q80X72|LRC15_MOUSE	Q80X72	LRC15_MOUSE	Lrrc15	Leucine-rich repeat-containing protein 15	95681.2	14766.1	197552	36490.8	28173.6	16546.5	23228.3	31152.3	1.30436	2.38778	0.282168
sp|Q7TSY8|SGOL2_MOUSE	Q7TSY8	SGOL2_MOUSE	Sgol2	Shugoshin-like 2	82594.1	62043.3	23618.7	36066.3	28444.4	30156.2	41318.6	36007.4	1.30345	0.0264519	0.400037
sp|Q07832|PLK1_MOUSE	Q07832	PLK1_MOUSE	Plk1	Serine/threonine-protein kinase PLK1	56869.6	65150.7	14732.7	43163.5	37849.7	11807.9	24665.1	49102.5	1.29703	0.221453	0.570973
sp|D3YXK2|SAFB1_MOUSE	D3YXK2	SAFB1_MOUSE	Safb	Scaffold attachment factor B1	70429	33909.2	26116.1	21826.2	21111.7	21420.3	66052.5	67540	1.29465	0.172749	1.65122
sp|Q09XV5|CHD8_MOUSE	Q09XV5	CHD8_MOUSE	Chd8	Chromodomain-helicase-DNA-binding protein 8	19481.7	81247.8	16177.4	47550.2	27291.5	13813.8	28778.1	48304.4	1.29309	0.632594	0.907078
tr|Q3TIX6|Q3TIX6_MOUSE	Q3TIX6	Q3TIX6_MOUSE	Fubp3	Protein Fubp3	50145.4	39963	15934.5	24990.6	22487.3	14314.9	68211.9	70948.7	1.29187	0.153192	1.91889
tr|E9PVX6|E9PVX6_MOUSE	E9PVX6	E9PVX6_MOUSE	Mki67	Protein Mki67	51126.3	56584.1	13899.7	37773.1	31527.3	12601.3	41904.9	56625.7	1.28737	0.227693	1.15886
tr|G5E8E3|G5E8E3_MOUSE	G5E8E3	G5E8E3_MOUSE	2310022A10Rik	Protein 2310022A10Rik	68718	50668.6	18884.8	43435.6	35306.3	13954.6	34572.6	48196.7	1.27713	0.339263	0.748654
sp|O88974|SETB1_MOUSE	O88974	SETB1_MOUSE	Setdb1	Histone-lysine N-methyltransferase SETDB1	43016.6	68937.8	15390.8	48822.8	33201.8	12994.5	25187.3	42028.3	1.27706	0.475103	0.54102
sp|Q91XU0|WRIP1_MOUSE	Q91XU0	WRIP1_MOUSE	Wrnip1	ATPase WRNIP1	81333.4	59554.9	36412.6	36019.1	31120.9	27088.9	39342.7	37852.5	1.27522	0.315359	0.407248
sp|Q3UA06|PCH2_MOUSE	Q3UA06	PCH2_MOUSE	Trip13	Pachytene checkpoint protein 2 homolog	11157.7	86883.8	12907.2	67081	25704.8	15005.3	10780.3	31706.7	1.26801	0.974399	0.061635
sp|Q91Z31|PTBP2_MOUSE	Q91Z31	PTBP2_MOUSE	Ptbp2	Polypyrimidine tract-binding protein 2	71269.5	45872.6	29279.2	25762.2	25439.5	23807.2	32087.4	48810.1	1.25016	0.16049	0.716067
tr|B1AWL2|B1AWL2_MOUSE	B1AWL2	B1AWL2_MOUSE	Zfp462	Protein Zfp462	41868.3	60677.9	14341.3	41760.1	30070	13344.9	34447.1	55862.9	1.24001	0.369846	1.05669
sp|Q8BJL0|SMAL1_MOUSE	Q8BJL0	SMAL1_MOUSE	Smarcal1	SWI/SNF-related matrix-associated actin-dependent regulator of chromatin subfamily A-like protein 1	29963.1	77086	11993.8	43335.2	33274	12919.4	22080.7	50260.3	1.21251	0.26035	0.647125
sp|Q8VE92|RBM4B_MOUSE	Q8VE92	RBM4B_MOUSE	Rbm4b	RNA-binding protein 4B	69308.4	57954.1	20155.5	40832.7	9884.42	45125.3	61279.8	12808.5	1.21005	0.148846	0.429561
sp|Q02395|MTF2_MOUSE	Q02395	MTF2_MOUSE	Mtf2	Metal-response element-binding transcription factor 2	29872.3	64843.2	16834	47619	30568	10555.8	31336.4	50822.1	1.20363	0.648273	0.998439
sp|P33609|DPOLA_MOUSE	P33609	DPOLA_MOUSE	Pola1	DNA polymerase alpha catalytic subunit	44274.5	80212.4	24395.5	42570.6	34754.1	19741.4	21362.2	41517.4	1.19178	0.297291	0.206452
sp|Q5DW34|EHMT1_MOUSE	Q5DW34	EHMT1_MOUSE	Ehmt1	Histone-lysine N-methyltransferase EHMT1	47617.1	60820.5	18432.8	35010.3	31020.4	16488.1	42202.1	55030.7	1.19061	0.169818	1.03326
sp|Q3URQ0|TEX10_MOUSE	Q3URQ0	TEX10_MOUSE	Tex10	Testis-expressed sequence 10 protein	31303.4	71601.8	14621.7	52124.1	30749.9	14404.1	25546.4	44578.7	1.18839	0.563825	0.635078
sp|Q8C2Q3|RBM14_MOUSE	Q8C2Q3	RBM14_MOUSE	Rbm14	RNA-binding protein 14	65114.3	48495	20003.7	29390.8	31033.8	19065.6	44320.5	46998.7	1.18122	-0.0204439	0.866124
sp|Q3URR7|ZSC10_MOUSE	Q3URR7	ZSC10_MOUSE	Zscan10	Zinc finger and SCAN domain-containing protein 10	53909.2	49978.6	12812.2	27448	28468.8	17356.8	37329.2	69295.5	1.1808	-0.186796	1.21832
sp|Q6P3Y5|Z280C_MOUSE	Q6P3Y5	Z280C_MOUSE	Znf280c	Zinc finger protein 280C	58237.9	56288.7	14395.9	32974.8	30601.9	19983.1	42368.1	60901.4	1.1789	-0.0947157	1.02963
tr|A2BDX0|A2BDX0_MOUSE	A2BDX0	A2BDX0_MOUSE	Adnp	Activity-dependent neuroprotector homeobox protein	63552.2	61285.8	18611.1	36405.4	35423.7	19888.2	27369.5	50294.8	1.17439	-0.00772779	0.48966
tr|E9Q796|E9Q796_MOUSE	E9Q796	E9Q796_MOUSE	Scml2	Protein Scml2	41309.8	53636.6	9028.74	33899.6	31272.7	10857.9	38764.4	67593.8	1.17225	0.0270639	1.33599
sp|Q9QX47|SON_MOUSE	Q9QX47	SON_MOUSE	Son	Protein SON	63809.5	35399.8	41192	24905	24647.6	19413.5	80782.9	56462.1	1.17097	0.58508	1.63918
sp|Q6P5D8|SMHD1_MOUSE	Q6P5D8	SMHD1_MOUSE	Smchd1	Structural maintenance of chromosomes flexible hinge domain-containing protein 1	41024.9	74371.1	15245.1	39167.5	38236.2	13134.3	25891.8	48280.9	1.16758	0.0830003	0.529946
sp|P40201|CHD1_MOUSE	P40201	CHD1_MOUSE	Chd1	Chromodomain-helicase-DNA-binding protein 1	50942.6	50126.1	18922.5	32526.7	28038	17119.6	44614.5	61556	1.1623	0.188179	1.23334
sp|Q9CYR0|SSBP_MOUSE	Q9CYR0	SSBP_MOUSE	Ssbp1	Single-stranded DNA-binding protein, mitochondrial	136097	39156	61514.1	32752.2	24006.7	54566.2	60281.8	15862.4	1.15733	0.262711	-0.0452975
sp|Q9CX86|ROA0_MOUSE	Q9CX86	ROA0_MOUSE	Hnrnpa0	Heterogeneous nuclear ribonucleoprotein A0	81864.9	39656	36210.5	32463.3	26464.3	28288.9	47630.6	37930.4	1.15019	0.326816	0.64401
sp|Q80WE4|KI20B_MOUSE	Q80WE4	KI20B_MOUSE	Kif20b	Kinesin-like protein KIF20B	42386.3	61860.6	21036.6	39098.5	33392.5	13745.4	35075.5	53969.5	1.14504	0.351317	0.917645
tr|E9QNN1|E9QNN1_MOUSE	E9QNN1	E9QNN1_MOUSE	Dhx9	ATP-dependent RNA helicase A	59679.3	51217.1	35604.3	30942.6	27760.7	22556.1	37349.3	49463.1	1.1401	0.40333	0.786861
sp|A2A4P0|DHX8_MOUSE	A2A4P0	DHX8_MOUSE	Dhx8	ATP-dependent RNA helicase DHX8	42509.9	43503.5	19117.1	26891.8	21708	17727.3	57082.1	76415	1.12507	0.222425	1.75925
tr|A2ART2|A2ART2_MOUSE	A2ART2	A2ART2_MOUSE	Gm4245	Protein Gm14431	34520.8	66003.9	10622	38841.3	32379.5	13800.8	39785.5	56298.2	1.1222	0.0990827	1.05701
sp|Q8BUI3|LRWD1_MOUSE	Q8BUI3	LRWD1_MOUSE	LRWD1	Leucine-rich repeat and WD repeat-containing protein 1	54636.5	58350.9	21191.4	42301.1	35560.9	16777.3	32010.6	51653.4	1.11023	0.278723	0.676745
sp|Q9CXK8|NIP7_MOUSE	Q9CXK8	NIP7_MOUSE	Nip7	60S ribosome subunit biogenesis protein NIP7 homolog	28655.2	65190.3	22140.3	59605.9	21320	22187.4	32867.2	42537.7	1.10903	0.909891	0.793399
sp|Q8BMA6|SRP68_MOUSE	Q8BMA6	SRP68_MOUSE	Srp68	Signal recognition particle subunit SRP68	84294.9	53874.6	35798	49288.2	45464.8	18667.4	18742.3	36916.3	1.10732	0.407877	-0.204441
sp|Q9WUV0|ORC5_MOUSE	Q9WUV0	ORC5_MOUSE	Orc5	Origin recognition complex subunit 5	66040.8	50745.1	32414.5	39470.6	28302.5	26097.7	39477.2	53029.1	1.10218	0.402078	0.765939
sp|Q9CZJ1|UTP11_MOUSE	Q9CZJ1	UTP11_MOUSE	Utp11l	Probable U3 small nucleolar RNA-associated protein 11	46214.8	54582.7	26668.5	51083	23252.7	23831.7	53907.5	39319.3	1.09814	0.723624	0.985497
tr|Q3V1Z5|Q3V1Z5_MOUSE	Q3V1Z5	Q3V1Z5_MOUSE	Rps4l	40S ribosomal protein S4	37068.4	61832.8	22741.7	53564.4	21185.1	25219.1	40955.8	34298.1	1.09173	0.717542	0.69751
sp|P70333|HNRH2_MOUSE	P70333	HNRH2_MOUSE	Hnrnph2	Heterogeneous nuclear ribonucleoprotein H2	50586.4	50815.3	21174.8	32737.1	27951.7	19803.3	35024.7	49878.3	1.08636	0.174953	0.830165
sp|Q99J83|ATG5_MOUSE	Q99J83	ATG5_MOUSE	Atg5	Autophagy protein 5	46329.4	44655.7	17259.3	25945	27768.2	15185.1	54606.8	72926.4	1.08286	0.0084066	1.57003
sp|Q5RJY2|G2E3_MOUSE	Q5RJY2	G2E3_MOUSE	G2e3	G2/M phase-specific E3 ubiquitin-protein ligase	58987.4	61435.4	30935.1	34934.1	27337.4	29529.9	41544.5	50103.9	1.08244	0.212005	0.68851
sp|O88569|ROA2_MOUSE	O88569	ROA2_MOUSE	Hnrnpa2b1	Heterogeneous nuclear ribonucleoproteins A2/B1	73278.9	42700	27790.1	27571.7	28026.8	26839.9	44295.5	40189.9	1.07986	0.0129575	0.622771
sp|Q99K48|NONO_MOUSE	Q99K48	NONO_MOUSE	Nono	Non-POU domain-containing octamer-binding protein	52493.4	44454.6	18020.8	30392.4	29281.5	16663.3	57592.4	61196.2	1.07731	0.0755003	1.37042
sp|Q8VEK3|HNRPU_MOUSE	Q8VEK3	HNRPU_MOUSE	Hnrnpu	Heterogeneous nuclear ribonucleoprotein U	75864.9	44039.8	30363	32231.1	27842.4	29202.9	46234	45932.4	1.07171	0.133921	0.692136
sp|Q8R0F5|RBMX2_MOUSE	Q8R0F5	RBMX2_MOUSE	Rbmx2	RNA-binding motif protein, X-linked 2	45742.5	30122.2	15612.4	27473.4	22926.2	13197.6	70157.2	81230.4	1.07048	0.254266	2.06723
sp|Q60862|ORC2_MOUSE	Q60862	ORC2_MOUSE	Orc2	Origin recognition complex subunit 2	75634.2	55741.2	34010	37695.5	29473.6	33220	32931.9	44688.7	1.0673	0.193765	0.308122
sp|P22518|CLK1_MOUSE	P22518	CLK1_MOUSE	Clk1	Dual specificity protein kinase CLK1	70031.9	35496.9	28300.2	27090.5	29144.6	21241.1	80624.5	52862.1	1.06655	0.136632	1.40561
sp|Q8R2M2|TDIF2_MOUSE	Q8R2M2	TDIF2_MOUSE	Dnttip2	Deoxynucleotidyltransferase terminal-interacting protein 2	39745.2	62741.6	30333.9	34113.1	24009.3	25037.5	50972.4	53220.6	1.06321	0.393955	1.08703
tr|A2A7B5|A2A7B5_MOUSE	A2A7B5	A2A7B5_MOUSE	Prdm2	Protein Prdm2	46494.6	58255.9	15299.1	27721.6	30329	19977.4	39704.5	66743.1	1.05814	-0.22571	1.08133
sp|Q9WUN2|TBK1_MOUSE	Q9WUN2	TBK1_MOUSE	Tbk1	Serine/threonine-protein kinase TBK1	19518.1	71117.2	25985.3	53318.2	31901.2	11666	18479.3	39799.9	1.05683	0.864142	0.419741
sp|O88700|BLM_MOUSE	O88700	BLM_MOUSE	Blm	Bloom syndrome protein homolog	70521.2	62987.2	41453.7	41216.4	31777.1	32516.3	29073.9	35377.3	1.05419	0.362695	0.00353709
sp|P70318|TIAR_MOUSE	P70318	TIAR_MOUSE	Tial1	Nucleolysin TIAR	60931.9	31280.5	22416.4	22414.1	22068.3	22372.5	88129.7	62671.2	1.05307	0.0125959	1.76269
tr|B2RT41|B2RT41_MOUSE	B2RT41	B2RT41_MOUSE	Zfc3h1	Protein Zfc3h1	43260.4	37379	12684.8	32762.5	28541.2	10352.8	84829.5	67892	1.05194	0.224647	1.97328
sp|Q65Z40|WAPL_MOUSE	Q65Z40	WAPL_MOUSE	Wapal	Wings apart-like protein homolog	18514.3	78465.3	10957.8	50523.2	35457.7	11377.3	17659.7	47703.5	1.05009	0.392553	0.480892
sp|O35326|SRSF5_MOUSE	O35326	SRSF5_MOUSE	Srsf5	Serine/arginine-rich splicing factor 5	61210.8	24878	18195.8	18712.2	16636.1	25147.5	77063.1	80948.4	1.04289	-0.179005	1.91902
sp|Q8BL97|SRSF7_MOUSE	Q8BL97	SRSF7_MOUSE	Srsf7	Serine/arginine-rich splicing factor 7	53461.2	32411.2	24714.4	24065.7	22428	19294.9	70327	71098.4	1.04135	0.225451	1.76113
sp|Q60668|HNRPD_MOUSE	Q60668	HNRPD_MOUSE	Hnrnpd	Heterogeneous nuclear ribonucleoprotein D0	67139.7	38937.6	41142.7	26059.7	21885.1	29805.2	54344	54618.3	1.03715	0.378621	1.07586
sp|Q61188|EZH2_MOUSE	Q61188	EZH2_MOUSE	Ezh2	Histone-lysine N-methyltransferase EZH2	27112.6	61977.3	58089.5	39227.8	28462.7	15040.1	33151.1	59713.5	1.03415	1.16159	1.09402
sp|Q14B71|CDCA2_MOUSE	Q14B71	CDCA2_MOUSE	Cdca2	Cell division cycle-associated protein 2	46298	61809.6	16291.8	40109.1	28457.9	24378.5	44447.2	52311.9	1.03287	0.0941884	0.872868
sp|Q9ERE2|KRT81_MOUSE	Q9ERE2	KRT81_MOUSE	Krt81	Keratin, type II cuticular Hb1	10064.1	4598.73	746823	15343.8	3312.49	3867.4	2365.01	5915.15	1.03013	6.73	0.205696
sp|Q8BIQ5|CSTF2_MOUSE	Q8BIQ5	CSTF2_MOUSE	Cstf2	Cleavage stimulation factor subunit 2	67180	42594.3	34065.7	31457	28159.3	25716.3	46916.9	53037.5	1.02684	0.282362	0.891638
sp|Q8C9B9|DIDO1_MOUSE	Q8C9B9	DIDO1_MOUSE	Dido1	Death-inducer obliterator 1	32895.5	51116.4	14937.6	34863.3	26970.2	14623.8	61339.7	68069	1.01422	0.259799	1.63749
sp|Q9DBR0|AKAP8_MOUSE	Q9DBR0	AKAP8_MOUSE	Akap8	A-kinase anchor protein 8	46853	35005.2	20887.9	24607.1	24843.8	15718.2	55768.3	79206.9	1.013	0.16558	1.7345
sp|Q5SS00|ZDBF2_MOUSE	Q5SS00	ZDBF2_MOUSE	Zdbf2	DBF4-type zinc finger-containing protein 2 homolog	49353.6	70387.6	13765.1	38497.5	39138.5	20602	30628	48025.7	1.00314	-0.192931	0.396804
tr|B8JJZ4|B8JJZ4_MOUSE	B8JJZ4	B8JJZ4_MOUSE	Zfp808	Protein Zfp808	56836.3	55233.4	35386.7	36340.6	25560.4	30460.7	41069.1	46966.6	1.00036	0.356553	0.65212
sp|Q5SSZ5|TENS3_MOUSE	Q5SSZ5	TENS3_MOUSE	Tns3	Tensin-3	15442.7	77425.4	12646.1	65008.7	30237.8	16199.2	17493	28000.2	0.999907	0.741798	-0.0296247
sp|Q4QY64|ATAD5_MOUSE	Q4QY64	ATAD5_MOUSE	Atad5	ATPase family AAA domain-containing protein 5	46455.7	57329.6	24133.7	38575.3	31521	20393.3	37313.8	54290.2	0.999397	0.27254	0.819278
sp|Q00PI9|HNRL2_MOUSE	Q00PI9	HNRL2_MOUSE	Hnrnpul2	Heterogeneous nuclear ribonucleoprotein U-like protein 2	52501	49041.3	25367.7	31998	28881.1	22125.5	39599.8	55524.9	0.993324	0.169503	0.899136
sp|P70388|RAD50_MOUSE	P70388	RAD50_MOUSE	Rad50	DNA repair protein RAD50	52083.4	66676.2	18175.5	48868.6	44305.9	15587.8	20444.5	41603	0.987569	0.162708	0.0509709
sp|Q497V5|SRBD1_MOUSE	Q497V5	SRBD1_MOUSE	Srbd1	S1 RNA-binding domain-containing protein 1	56057.8	50617.6	27178.7	36593.9	32208.8	21698.5	49921.3	51663.8	0.984674	0.242455	0.914135
sp|Q8VIJ6|SFPQ_MOUSE	Q8VIJ6	SFPQ_MOUSE	Sfpq	Splicing factor, proline- and glutamine-rich	51177.8	39853.7	29560.8	28563.8	14982.9	31321	69002.1	63349.7	0.97523	0.328012	1.51517
tr|E9Q5K9|E9Q5K9_MOUSE	E9Q5K9	E9Q5K9_MOUSE	Ythdc1	YTH domain-containing protein 1	51218.7	39358.6	18755	32937.5	25329	21083.9	55023.2	67019.3	0.964624	0.155431	1.39479
sp|Q8K327|CHAP1_MOUSE	Q8K327	CHAP1_MOUSE	Champ1	Chromosome alignment-maintaining phosphoprotein 1	43255.1	51556.6	17614.4	36382.7	33536.5	15481.9	43784.6	64484.9	0.951743	0.139558	1.14323
tr|G3X963|G3X963_MOUSE	G3X963	G3X963_MOUSE	Atad2	ATPase family AAA domain-containing protein 2	61986.1	53364	20954.3	37785	37391.8	22323.4	34312.9	55981.3	0.94985	-0.0237708	0.596535
tr|Q0VBL3|Q0VBL3_MOUSE	Q0VBL3	Q0VBL3_MOUSE	Rbm15	Protein Rbm15	54950.9	39331.1	17213.1	26515.9	31351.7	17565.9	57515.9	72045.5	0.946629	-0.161763	1.40521
sp|Q8CFQ3|AQR_MOUSE	Q8CFQ3	AQR_MOUSE	Aqr	Intron-binding protein aquarius	34253.8	56758	16799.1	40882.1	28419.6	18869.9	38849.4	61895	0.944535	0.286582	1.09111
tr|E9Q5G3|E9Q5G3_MOUSE	E9Q5G3	E9Q5G3_MOUSE	Kif23	Kinesin-like protein KIF23	25116.1	71550.5	11609	46430.7	42253.7	8232.01	22065.4	43658.2	0.937143	0.201165	0.380539
sp|O35492|CLK3_MOUSE	O35492	CLK3_MOUSE	Clk3	Dual specificity protein kinase CLK3	45596.8	51545.4	22849.2	31503.9	30318.9	20786	53027.9	59273.5	0.926637	0.0889017	1.13584
sp|Q6NXK2|ZN532_MOUSE	Q6NXK2	ZN532_MOUSE	Znf532	Zinc finger protein 532	29793	69455.3	18031.5	38308.3	30132	22182.6	27579.4	55318.4	0.923829	0.106942	0.664121
sp|A2A791|ZMYM4_MOUSE	A2A791	ZMYM4_MOUSE	Zmym4	Zinc finger MYM-type protein 4	30870.8	62443.8	15162.9	41661.3	38217	11055.5	26918.5	59984.3	0.921322	0.205727	0.818621
sp|Q7TMK9|HNRPQ_MOUSE	Q7TMK9	HNRPQ_MOUSE	Syncrip	Heterogeneous nuclear ribonucleoprotein Q	73327.6	41952.5	38260.6	32318.8	29127.8	31869.7	48754.4	41397.7	0.918321	0.210497	0.563611
sp|Q8BI72|CARF_MOUSE	Q8BI72	CARF_MOUSE	Cdkn2aip	CDKN2A-interacting protein	45859.2	41789.9	24881.2	28446.8	27354.7	19272.4	55325.6	67916	0.910571	0.193723	1.40225
tr|F7B5B5|F7B5B5_MOUSE	F7B5B5	F7B5B5_MOUSE	Hnrnpr	Protein Hnrnpr	72053.8	38693.5	55058.6	27527.1	23947.5	35019.5	49243.5	43793.3	0.909293	0.485985	0.657895
sp|Q9Z148|EHMT2_MOUSE	Q9Z148	EHMT2_MOUSE	Ehmt2	Histone-lysine N-methyltransferase EHMT2	39875.8	59415.3	24527.5	39793.3	35024.2	18107.7	31603.4	53163.1	0.902085	0.275705	0.673914
sp|Q8CIB9|ESCO2_MOUSE	Q8CIB9	ESCO2_MOUSE	Esco2	N-acetyltransferase ESCO2	36848.3	60123.7	14412.7	44298.2	41589.4	10325.9	26661.1	52790.6	0.901408	0.17747	0.613917
sp|P48754|BRCA1_MOUSE	P48754	BRCA1_MOUSE	Brca1	Breast cancer type 1 susceptibility protein homolog	39942.2	65780.6	23865.3	45817.5	37791.2	18850.6	27028.5	47941	0.900347	0.298934	0.404436
sp|Q68ED3|PAPD5_MOUSE	Q68ED3	PAPD5_MOUSE	Papd5	Non-canonical poly(A) RNA polymerase PAPD5	33543.8	55233.5	24132.6	48369.6	29351.8	18272.4	36553.5	53564.2	0.898495	0.606331	0.920115
sp|Q9JIH2|NUP50_MOUSE	Q9JIH2	NUP50_MOUSE	Nup50	Nuclear pore complex protein Nup50	41637.8	52471.6	22340.2	38218	31389	19216.2	45432.4	58796.5	0.895055	0.259035	1.0424
sp|Q64368|DAZL_MOUSE	Q64368	DAZL_MOUSE	Dazl	Deleted in azoospermia-like	40429.9	56903	24356.4	40257.3	29672.3	23010	42976.7	48498.2	0.88561	0.294522	0.796057
tr|E9Q3G8|E9Q3G8_MOUSE	E9Q3G8	E9Q3G8_MOUSE	Nup153	Protein Nup153	34184.3	59504.7	11187	38172.6	38896.8	11869.7	34456.7	59910	0.884003	-0.0405466	0.894401
sp|Q9Z0H1|WDR46_MOUSE	Q9Z0H1	WDR46_MOUSE	Wdr46	WD repeat-containing protein 46	29594.4	55307.6	15519.9	35024.3	32336.9	13676.2	40366.2	67003.5	0.883755	0.135502	1.22247
tr|Q3ULB0|Q3ULB0_MOUSE	Q3ULB0	Q3ULB0_MOUSE	Rbm6	Protein Rbm6	38705.4	43477.2	26387.7	25243.4	23448.9	21121.3	63822.9	77295.6	0.882754	0.212162	1.66276
sp|P33174|KIF4_MOUSE	P33174	KIF4_MOUSE	Kif4	Chromosome-associated kinesin KIF4	28809.4	67383.3	14694.8	50563	39690.8	12687.8	19391.9	49712.7	0.876952	0.317174	0.399806
sp|Q6PR54|RIF1_MOUSE	Q6PR54	RIF1_MOUSE	Rif1	Telomere-associated protein RIF1	37596.5	58294.8	19278.6	41080.4	36020.5	16298.5	36197.7	55183.3	0.874064	0.206235	0.804559
sp|Q810B6|ANFY1_MOUSE	Q810B6	ANFY1_MOUSE	Ankfy1	Ankyrin repeat and FYVE domain-containing protein 1	17210.2	81671.9	9433.36	61608.2	36777.1	17295.4	22379.7	35382.3	0.870813	0.393766	0.095224
sp|Q921E6|EED_MOUSE	Q921E6	EED_MOUSE	Eed	Polycomb protein EED	38626.9	60141.3	22801.1	56493.9	25650.3	28411.8	46082.5	38046.4	0.86943	0.552613	0.637984
sp|Q8CGZ0|CHERP_MOUSE	Q8CGZ0	CHERP_MOUSE	Cherp	Calcium homeostasis endoplasmic reticulum protein	31585.8	42481.5	26083.6	25532.3	19242.8	21308	84324.1	81882.7	0.869107	0.348088	2.03518
sp|Q01320|TOP2A_MOUSE	Q01320	TOP2A_MOUSE	Top2a	DNA topoisomerase 2-alpha	40169.4	52514.9	16648.9	43761.6	35654.9	15203.1	33891.8	58168.2	0.865852	0.248327	0.856101
sp|O89112|LANC1_MOUSE	O89112	LANC1_MOUSE	Lancl1	LanC-like protein 1	54081.5	49528.2	81454.7	44230.8	20254.1	36659.5	34322.4	36854	0.864313	1.14297	0.322625
sp|Q9DBY8|NVL_MOUSE	Q9DBY8	NVL_MOUSE	Nvl	Nuclear valosin-containing protein-like	50512.9	48201.3	24988	43424.3	32340.4	22114.6	50811.3	47680.1	0.858193	0.329192	0.854931
tr|J3QQ16|J3QQ16_MOUSE	J3QQ16	J3QQ16_MOUSE	Col6a3	Protein Col6a3	33778.4	52344.9	36255.5	41652.2	23019.3	24662.8	30210.1	55017.5	0.852955	0.708319	0.837872
sp|O08811|ERCC2_MOUSE	O08811	ERCC2_MOUSE	Ercc2	TFIIH basal transcription factor complex helicase XPD subunit	23854.1	67426.4	19220.1	51026.3	27692.9	22855.6	29738.9	51743.6	0.852639	0.474756	0.688824
tr|Q91VU7|Q91VU7_MOUSE	Q91VU7	Q91VU7_MOUSE	Pus7	Protein Pus7	22255.5	67586.5	17686.4	54215.8	28806.4	20957	31974.6	45530.4	0.852306	0.530952	0.639203
sp|Q7TT18|MCAF1_MOUSE	Q7TT18	MCAF1_MOUSE	Atf7ip	Activating transcription factor 7-interacting protein 1	38415.3	70189.1	21246	45277.7	41311.9	18985.1	26981	44703.5	0.848923	0.141781	0.249572
sp|P16460|ASSY_MOUSE	P16460	ASSY_MOUSE	Ass1	Argininosuccinate synthase	6259.12	81325.4	8315.65	68507	42040.4	6717.24	7625.1	36301.6	0.845048	0.655904	-0.150529
sp|Q9R061|NUBP2_MOUSE	Q9R061	NUBP2_MOUSE	Nubp2	Cytosolic Fe-S cluster assembly factor NUBP2	15223.8	73202.4	12438.5	62668.7	39976.4	9458.22	9493.23	45917	0.838952	0.60343	0.16463
sp|B1AZI6|THOC2_MOUSE	B1AZI6	THOC2_MOUSE	Thoc2	THO complex subunit 2	43239.6	41981.3	20432	33636.4	29303	18408.9	64927.9	62727.9	0.836859	0.180435	1.41984
sp|Q9ERU9|RBP2_MOUSE	Q9ERU9	RBP2_MOUSE	Ranbp2	E3 SUMO-protein ligase RanBP2	30330	61393.6	13186.3	41485.8	39346.3	12021.9	31287.2	57257.6	0.836417	0.0899285	0.785533
sp|Q8VDD9|PHIP_MOUSE	Q8VDD9	PHIP_MOUSE	Phip	PH-interacting protein	39290.9	57588.9	18657.3	36280.2	36915.7	17403.4	35376.6	60596.7	0.834735	0.0163302	0.821172
sp|P61979|HNRPK_MOUSE	P61979	HNRPK_MOUSE	Hnrnpk	Heterogeneous nuclear ribonucleoprotein K	65228.5	37109.7	41747.9	27973.8	24911.9	32618.2	58300.7	53797.3	0.830955	0.277291	0.962371
sp|Q8CJF7|ELYS_MOUSE	Q8CJF7	ELYS_MOUSE	Ahctf1	Protein ELYS	34875.9	62430.2	16456.8	37448.3	36703.8	18207.7	36097.7	53813.7	0.825422	-0.026687	0.711396
sp|Q99JX7|NXF1_MOUSE	Q99JX7	NXF1_MOUSE	Nxf1	Nuclear RNA export factor 1	35748.8	46618.3	19387.4	38721	32980.7	13524.5	48467.1	66180.4	0.824676	0.321354	1.30174
sp|Q60749|KHDR1_MOUSE	Q60749	KHDR1_MOUSE	Khdrbs1	KH domain-containing, RNA-binding, signal transduction-associated protein 1	51868.4	37653.3	27843.9	27228.5	27741.2	22862.1	66425.9	66786.8	0.823005	0.122097	1.39643
tr|Q3U109|Q3U109_MOUSE	Q3U109	Q3U109_MOUSE	Brpf1	Protein Brpf1	51188.9	41178	20807	35790.8	29645.8	22590	53244.7	61356.1	0.822336	0.115707	1.13351
sp|O55201|SPT5H_MOUSE	O55201	SPT5H_MOUSE	Supt5h	Transcription elongation factor SPT5	18910.1	61285.6	11752.6	44967.9	32804.2	12549.8	35211.7	62414.7	0.822298	0.322642	1.10604
sp|Q91YK2|RRP1B_MOUSE	Q91YK2	RRP1B_MOUSE	Rrp1b	Ribosomal RNA processing protein 1 homolog B	35980.4	36719.9	25814.6	33947.9	29484.3	11883.1	70362.3	68121.6	0.813469	0.530748	1.74315
tr|L7N1W9|L7N1W9_MOUSE	L7N1W9	L7N1W9_MOUSE	Nlrp4f	NACHT, LRR and PYD domains-containing protein 4F	22640.5	71436.4	17921.9	46539.2	33509.1	20046.9	20069.9	51974.8	0.812793	0.267382	0.427844
sp|Q9R0U0|SRS10_MOUSE	Q9R0U0	SRS10_MOUSE	Srsf10	Serine/arginine-rich splicing factor 10	56775.7	33806.7	18305.6	23030.6	22850.4	28722.6	77931.7	67906.6	0.812613	-0.31921	1.49968
sp|Q9CW46|RAVR1_MOUSE	Q9CW46	RAVR1_MOUSE	Raver1	Ribonucleoprotein PTB-binding 1	47136.9	55448.7	19024.4	38955.3	34921.6	23541.2	38236.8	45939.1	0.811238	-0.0119713	0.52589
sp|Q99J72|ABEC3_MOUSE	Q99J72	ABEC3_MOUSE	Apobec3	DNA dC->dU-editing enzyme APOBEC-3	27677.8	66357.6	18620.1	47368.1	43813.5	9978.37	22314.5	47958.4	0.805816	0.294819	0.385579
sp|Q80W00|PP1RA_MOUSE	Q80W00	PP1RA_MOUSE	Ppp1r10	Serine/threonine-protein phosphatase 1 regulatory subunit 10	30487.5	27581.9	16835.8	18409.2	17107.6	16111.8	84630.7	99299.7	0.805753	0.0853917	2.46906
sp|Q9EP69|SAC1_MOUSE	Q9EP69	SAC1_MOUSE	Sacm1l	Phosphatidylinositide phosphatase SAC1	19677.6	66209.3	21861.6	37497.8	34666.8	14682.4	22882.9	55872	0.799413	0.266451	0.674344
tr|F8VPM0|F8VPM0_MOUSE	F8VPM0	F8VPM0_MOUSE	Baz2a	Bromodomain adjacent to zinc finger domain protein 2A	24710.6	62037.4	15577.2	44381.5	39451.3	10540	25131.6	55928.8	0.795156	0.262294	0.69732
sp|Q8VCD7|KDM4C_MOUSE	Q8VCD7	KDM4C_MOUSE	Kdm4c	Lysine-specific demethylase 4C	16788.5	72101.4	10717.3	47842.8	43375.2	7963.43	15127.3	58873.3	0.791974	0.189874	0.527492
sp|Q8BJ71|NUP93_MOUSE	Q8BJ71	NUP93_MOUSE	Nup93	Nuclear pore complex protein Nup93	32813.3	59457.5	23652.5	50059.2	27784	25534.9	34267.4	45107.5	0.791228	0.467249	0.574038
tr|E9PWW9|E9PWW9_MOUSE	E9PWW9	E9PWW9_MOUSE	Rsf1	Protein Rsf1	66721.3	44263.9	30036.3	35339.3	31752.1	32654.2	42566	56257.6	0.785095	0.0215508	0.617654
sp|Q99KG3|RBM10_MOUSE	Q99KG3	RBM10_MOUSE	Rbm10	RNA-binding protein 10	29875.5	36007.9	25218.4	23212.8	20471.7	17863.3	78183.8	88226	0.781252	0.337274	2.118
sp|Q920L1|FADS1_MOUSE	Q920L1	FADS1_MOUSE	Fads1	Fatty acid desaturase 1	21507.3	72433	17721.1	54394.3	37507.7	17167.6	21453.2	44458.6	0.780857	0.399421	0.269648
sp|P52431|DPOD1_MOUSE	P52431	DPOD1_MOUSE	Pold1	DNA polymerase delta catalytic subunit	11961.1	73723.9	8874.18	57534.7	41368.1	8545.87	14507.1	49775	0.779597	0.411932	0.364974
sp|Q9Z277|BAZ1B_MOUSE	Q9Z277	BAZ1B_MOUSE	Baz1b	Tyrosine-protein kinase BAZ1B	61340.8	49220.9	33649.4	34885.1	32302.4	32178.1	44684.4	49080.6	0.777917	0.0879677	0.540187
sp|P35550|FBRL_MOUSE	P35550	FBRL_MOUSE	Fbl	rRNA 2'-O-methyltransferase fibrillarin	40232.7	47892.1	20468.8	39254.8	32786.8	18649.6	38750.8	60706.8	0.776759	0.215512	0.951294
sp|Q5I043|UBP28_MOUSE	Q5I043	UBP28_MOUSE	Usp28	Ubiquitin carboxyl-terminal hydrolase 28	8957.05	82369.3	16521.3	61722.6	40848	12502.8	11157.1	38400.1	0.775522	0.55247	-0.106414
sp|Q04692|SMRCD_MOUSE	Q04692	SMRCD_MOUSE	Smarcad1	SWI/SNF-related matrix-associated actin-dependent regulator of chromatin subfamily A containing DEAD/H box 1	15842.5	73211.9	14355.3	47948	40185.5	11991	15427.8	52363.7	0.771287	0.255908	0.377704
sp|Q61666|HIRA_MOUSE	Q61666	HIRA_MOUSE	Hira	Protein HIRA	37733.7	53024.8	19348.2	42098	38050.4	15200.1	34939.2	58360.1	0.769237	0.20653	0.809071
sp|P83917|CBX1_MOUSE	P83917	CBX1_MOUSE	Cbx1	Chromobox protein homolog 1	68506.2	32933.7	54872.7	37508.4	29829.9	29769.1	48733.4	55977.9	0.767264	0.632309	0.813056
sp|Q9D0F6|RFC5_MOUSE	Q9D0F6	RFC5_MOUSE	Rfc5	Replication factor C subunit 5	40322.5	54474.1	26376.8	44139	32495.1	23206.1	32225.4	48370.6	0.767126	0.340238	0.533001
sp|P09405|NUCL_MOUSE	P09405	NUCL_MOUSE	Ncl	Nucleolin	72618.4	38751.3	37230	26679.4	27940.3	37675.8	54404.5	45553.8	0.763235	-0.0380225	0.607278
sp|Q64127|TIF1A_MOUSE	Q64127	TIF1A_MOUSE	Trim24	Transcription intermediary factor 1-alpha	30991.6	62007.8	18886.5	48149.8	39725.9	15281.1	29201.8	47034	0.757604	0.285325	0.470852
sp|Q6PFR5|TRA2A_MOUSE	Q6PFR5	TRA2A_MOUSE	Tra2a	Transformer-2 protein homolog alpha	48203.8	34487.4	32280	39332.5	22956.5	26036.2	53282.6	63424.2	0.755169	0.547648	1.25225
tr|E9Q9Y4|E9Q9Y4_MOUSE	E9Q9Y4	E9Q9Y4_MOUSE	Tet1	Methylcytosine dioxygenase TET1	36732	51859.5	16406.1	35947.6	34619.2	18165	49258.5	60823.7	0.74706	-0.0118146	1.0604
sp|A2AKX3|SETX_MOUSE	A2AKX3	SETX_MOUSE	Setx	Probable helicase senataxin	32542.8	68937.4	29241.8	37850.3	37230.6	23269.9	23941.5	47461.1	0.746179	0.149197	0.239031
sp|Q9CY66|GAR1_MOUSE	Q9CY66	GAR1_MOUSE	Gar1	H/ACA ribonucleoprotein complex subunit 1	59455.1	29549.3	38354.7	23390.9	23131.1	30136.9	88176.5	67771.3	0.740608	0.213067	1.54972
sp|Q8R326|PSPC1_MOUSE	Q8R326	PSPC1_MOUSE	Pspc1	Paraspeckle component 1	70930.1	35265	38526.1	27578.2	27301	36394.8	70004.9	50293.5	0.737448	0.0535465	0.917348
sp|G5E870|TRIPC_MOUSE	G5E870	TRIPC_MOUSE	Trip12	E3 ubiquitin-protein ligase TRIP12	28567.2	60614.5	18032.9	49755.9	39809.6	13701	25099.9	54913.6	0.73692	0.341221	0.580417
sp|A2AJK6|CHD7_MOUSE	A2AJK6	CHD7_MOUSE	Chd7	Chromodomain-helicase-DNA-binding protein 7	23213.4	73361.8	17543.3	41056	39257.4	18699.8	37822.7	48668.8	0.736665	0.0158953	0.577571
sp|Q9D168|INT12_MOUSE	Q9D168	INT12_MOUSE	Ints12	Integrator complex subunit 12	35976.1	48819.4	12207.9	42058.3	36407.7	14531.8	43126.7	63041.2	0.735203	0.0912703	1.05949
sp|Q9D8C3|ALG13_MOUSE	Q9D8C3	ALG13_MOUSE	Alg13	Putative bifunctional UDP-N-acetylglucosamine transferase and deubiquitinase ALG13	16573.6	67953	14275.5	56142.1	38845.4	11982.5	16238.6	46112.6	0.733785	0.470317	0.294795
sp|Q3V300|KIF22_MOUSE	Q3V300	KIF22_MOUSE	Kif22	Kinesin-like protein KIF22	37457.5	58061.1	24770.6	44504.6	37764.6	19731.2	32006.1	52122.5	0.732324	0.268883	0.549139
sp|Q6NZF1|ZC11A_MOUSE	Q6NZF1	ZC11A_MOUSE	Zc3h11a	Zinc finger CCCH domain-containing protein 11A	44177.2	51976.5	21362.2	38224.6	37867.6	20161.5	47823.4	49568.2	0.728564	0.0382156	0.74702
sp|Q61539|ERR2_MOUSE	Q61539	ERR2_MOUSE	Esrrb	Steroid hormone receptor ERR2	22106.4	62020	15885.6	50488.5	40122	10773	27063.4	57576.3	0.725033	0.383097	0.73381
sp|P54276|MSH6_MOUSE	P54276	MSH6_MOUSE	Msh6	DNA mismatch repair protein Msh6	11803.9	75186	10083.8	52116	42540.2	10087.5	13610.9	49807	0.725025	0.241088	0.269066
sp|Q8K4P0|WDR33_MOUSE	Q8K4P0	WDR33_MOUSE	Wdr33	pre-mRNA 3' end processing protein WDR33	45806.2	36171.8	26037.4	30648.1	24893.8	24803.2	65446.7	68166.5	0.722078	0.189822	1.42683
sp|Q6PDQ2|CHD4_MOUSE	Q6PDQ2	CHD4_MOUSE	Chd4	Chromodomain-helicase-DNA-binding protein 4	41737.5	57272.6	24585.9	40253.2	37443.1	22691.1	32128.5	50634.3	0.71939	0.10868	0.460797
tr|E9Q7G0|E9Q7G0_MOUSE	E9Q7G0	E9Q7G0_MOUSE	Numa1	Protein Numa1	56774.1	48931.6	28658.2	36474.3	35013.5	29210.6	44877.5	49507.6	0.718866	0.0202625	0.555444
sp|Q9DCD2|SYF1_MOUSE	Q9DCD2	SYF1_MOUSE	Xab2	Pre-mRNA-splicing factor SYF1	21160.4	72247.3	19477	48828.7	34824.7	22038.3	23694.6	47912.9	0.716052	0.264516	0.332621
sp|Q8BY02|NKRF_MOUSE	Q8BY02	NKRF_MOUSE	Nkrf	NF-kappa-B-repressing factor	41154.4	49557.7	17015.4	38272.5	38118.5	17218.3	47415	53900.7	0.713055	-0.00127878	0.872545
sp|Q9QY81|PO210_MOUSE	Q9QY81	PO210_MOUSE	Nup210	Nuclear pore membrane glycoprotein 210	24191.9	58182.4	16953.4	40382.5	33215.4	17164.7	33659.4	58000.6	0.709339	0.186585	0.863438
sp|Q501J6|DDX17_MOUSE	Q501J6	DDX17_MOUSE	Ddx17	Probable ATP-dependent RNA helicase DDX17	38663.3	36644.5	19703.4	27550.8	24618.9	21470.5	69206.1	77885.9	0.708364	0.0360063	1.67421
sp|Q6PAC3|DCA13_MOUSE	Q6PAC3	DCA13_MOUSE	Dcaf13	DDB1- and CUL4-associated factor 13	29745.2	51810.8	17465.9	41022.2	33521.3	16440.3	37637.4	63387.6	0.70697	0.227322	1.01582
sp|Q9WUK4|RFC2_MOUSE	Q9WUK4	RFC2_MOUSE	Rfc2	Replication factor C subunit 2	30381.6	67544.3	25549.7	60376.2	27926.8	32088.9	33388.8	33995	0.70635	0.517753	0.167063
sp|Q640M1|UT14A_MOUSE	Q640M1	UT14A_MOUSE	Utp14a	U3 small nucleolar RNA-associated protein 14 homolog A	25071.3	59828.6	23824.5	43003.8	40276.3	11790.3	42777.4	53370.1	0.705403	0.3601	0.884889
sp|Q91Z83|MYH7_MOUSE	Q91Z83	MYH7_MOUSE	Myh7	Myosin-7	7415.97	15475.6	19288.9	5330.48	5494.66	8624.62	443377	5984.62	0.697149	0.802129	4.99214
tr|A2AUY4|A2AUY4_MOUSE	A2AUY4	A2AUY4_MOUSE	Baz2b	Protein Baz2b	41790.6	59856.4	23446.8	41602.2	38434.6	24274.9	28385.9	51550.1	0.696811	0.0528421	0.350161
sp|Q8VE97|SRSF4_MOUSE	Q8VE97	SRSF4_MOUSE	Srsf4	Serine/arginine-rich splicing factor 4	53925	37120.4	33812.8	26810.8	24963.2	31238.4	62004.2	67080.9	0.695973	0.109267	1.19964
sp|A2AWL7|MGAP_MOUSE	A2AWL7	MGAP_MOUSE	Mga	MAX gene-associated protein	34182.8	55816.5	23303.9	40461.7	36117.2	19548.3	35268.7	57260.1	0.693129	0.195993	0.733117
tr|L7N1Z0|L7N1Z0_MOUSE	L7N1Z0	L7N1Z0_MOUSE	Gm6871	Protein Gm6871	20601.7	69064	14621.4	46831.6	41850.9	13638.3	24453.7	48662.2	0.69235	0.147276	0.397978
sp|P59328|WDHD1_MOUSE	P59328	WDHD1_MOUSE	Wdhd1	WD repeat and HMG-box DNA-binding protein 1	33237.3	63573.1	18970.2	46940.8	38823.5	21101.4	28749.8	47190.5	0.692005	0.137364	0.34171
sp|Q8VHK9|DHX36_MOUSE	Q8VHK9	DHX36_MOUSE	Dhx36	ATP-dependent RNA helicase DHX36	26776.4	53485.9	22608.5	52551.4	33017.4	16672.3	32986.3	57407.4	0.691773	0.597015	0.863274
sp|Q8K298|ANLN_MOUSE	Q8K298	ANLN_MOUSE	Anln	Actin-binding protein anillin	23920.7	60364.4	18842	43780.2	36587.4	15627.4	28109	59364.6	0.690818	0.262216	0.744386
sp|Q9Z2Q2|KNOP1_MOUSE	Q9Z2Q2	KNOP1_MOUSE	Knop1	Lysine-rich nucleolar protein 1	35696.8	45241.8	25374.1	37816.3	33557.1	16700	62694.5	54898.4	0.687501	0.330378	1.2264
sp|Q6NS46|RRP5_MOUSE	Q6NS46	RRP5_MOUSE	Pdcd11	Protein RRP5 homolog	27699	54850.7	17069.9	42284.2	35696.9	15776	37762.3	59744.4	0.681449	0.205535	0.921687
tr|Q3TA68|Q3TA68_MOUSE	Q3TA68	Q3TA68_MOUSE	Wdr36	Protein Wdr36	25428.6	56239.5	19884.6	42302.8	32776.7	18190.2	37456	58316.2	0.680212	0.287062	0.910047
sp|Q8C7V3|UTP15_MOUSE	Q8C7V3	UTP15_MOUSE	Utp15	U3 small nucleolar RNA-associated protein 15 homolog	34893.3	45605	29423.1	43749.6	25776.9	24489.9	48489.9	54435.7	0.679354	0.541701	1.03392
sp|Q6A068|CDC5L_MOUSE	Q6A068	CDC5L_MOUSE	Cdc5l	Cell division cycle 5-like protein	35858.5	46984	23931.2	42295.9	25465.2	26268.9	62367.7	59305.6	0.679257	0.356307	1.23383
sp|Q571H0|NPA1P_MOUSE	Q571H0	NPA1P_MOUSE	Urb1	Nucleolar pre-ribosomal-associated protein 1	24167	51419.9	17699.3	43896.7	34393.8	12811.2	41766.8	63353	0.679194	0.383896	1.15502
sp|P23249|MOV10_MOUSE	P23249	MOV10_MOUSE	Mov10	Putative helicase MOV-10	35855.4	48425.3	12049.6	43539.5	41091.1	11566.3	40265	58364.4	0.678566	0.0781663	0.905382
sp|Q9D0D4|DIM1_MOUSE	Q9D0D4	DIM1_MOUSE	Dimt1	Probable dimethyladenosine transferase	31204.1	51381.6	21650.4	43993.3	32740.5	18885.5	34063.6	64634.6	0.677793	0.34656	0.934924
sp|Q8CG48|SMC2_MOUSE	Q8CG48	SMC2_MOUSE	Smc2	Structural maintenance of chromosomes protein 2	41837.3	61556.5	26728.1	49081.6	41064.9	23587.5	20290.7	42479.5	0.677373	0.229677	-0.0426255
sp|Q99L48|NMD3_MOUSE	Q99L48	NMD3_MOUSE	Nmd3	60S ribosomal export protein NMD3	18673.6	72303	14326.8	58840.8	34220.2	22719.1	19823.7	42308.1	0.676072	0.361781	0.125908
sp|Q8BFQ4|WDR82_MOUSE	Q8BFQ4	WDR82_MOUSE	Wdr82	WD repeat-containing protein 82	30400.1	56330.3	26799.2	57316.9	13833.4	40533.1	63344.6	31080.8	0.673821	0.629665	0.79646
sp|Q91VM5|RMXL1_MOUSE	Q91VM5	RMXL1_MOUSE	Rbmxl1	RNA binding motif protein, X-linked-like-1	34713	20318	287566	37290.4	13917.8	20623.2	44765	39789.8	0.671937	3.23342	1.29158
sp|Q8BG81|PDIP3_MOUSE	Q8BG81	PDIP3_MOUSE	Poldip3	Polymerase delta-interacting protein 3	41378.3	51635.1	20511.5	44899.2	35927.6	22748.9	25923.2	53591.7	0.664657	0.156744	0.438444
tr|B9EJ54|B9EJ54_MOUSE	B9EJ54	B9EJ54_MOUSE	Nup205	MCG21756, isoform CRA_b	29212.5	59976.9	17429.4	42845.1	39117.3	17174	30707.3	54644.2	0.663957	0.0986336	0.600503
sp|B2RRE4|Z518B_MOUSE	B2RRE4	Z518B_MOUSE	Znf518b	Zinc finger protein 518B	51887.4	54646.2	45010.6	36641.4	39062.1	28201.9	34785.3	42978.7	0.663402	0.279654	0.209267
sp|P53995|APC1_MOUSE	P53995	APC1_MOUSE	Anapc1	Anaphase-promoting complex subunit 1	24852.6	57763.8	17715.1	46318.4	32233.8	19937.1	24916.8	62214.5	0.663184	0.295585	0.739946
tr|A2AJ71|A2AJ71_MOUSE	A2AJ71	A2AJ71_MOUSE	Fubp3	Protein Fubp3 (Fragment)	49972.9	30338.9	21082.3	26172.2	25140.6	25794.6	63870.4	63097.4	0.65695	-0.108211	1.31773
sp|Q8C5L7|RBM34_MOUSE	Q8C5L7	RBM34_MOUSE	Rbm34	RNA-binding protein 34	40598.5	53806.9	20618.3	42308.4	40716	19226.2	38402.4	52691.6	0.655299	0.0701014	0.603785
sp|Q8BW72|KDM4A_MOUSE	Q8BW72	KDM4A_MOUSE	Kdm4a	Lysine-specific demethylase 4A	17171.1	70450.7	14265.1	46678.7	42642.1	13028.4	20488.9	51825.9	0.654376	0.130565	0.377377
sp|Q6ZQF0|TOPB1_MOUSE	Q6ZQF0	TOPB1_MOUSE	Topbp1	DNA topoisomerase 2-binding protein 1	37691.3	58448	28251.9	42462.6	38859.7	22246.8	38754.3	48970.9	0.653801	0.210681	0.521666
sp|Q9QWT9|KIFC1_MOUSE	Q9QWT9	KIFC1_MOUSE	Kifc1	Kinesin-like protein KIFC1	31162.2	60184.3	24662	44199.2	38043.6	20035.3	29005.5	51165.7	0.653335	0.245679	0.46507
sp|Q920B9|SP16H_MOUSE	Q920B9	SP16H_MOUSE	Supt16h	FACT complex subunit SPT16	40962.8	56040.1	26740.7	38265.1	37043	24701.8	41244.2	51137.2	0.651709	0.0742506	0.581284
sp|Q60848|HELLS_MOUSE	Q60848	HELLS_MOUSE	Hells	Lymphocyte-specific helicase	23206.1	67982.4	18235.4	48177.7	42981.3	15258.3	22785.4	47484.7	0.646851	0.189468	0.27091
sp|Q8C6P8|ZFP57_MOUSE	Q8C6P8	ZFP57_MOUSE	Zfp57	Zinc finger protein 57	16927.5	76991.7	24497.6	40841.8	39251.4	20750.2	17971.2	46097.3	0.64642	0.122953	0.0946144
sp|Q6PCM1|KDM3A_MOUSE	Q6PCM1	KDM3A_MOUSE	Kdm3a	Lysine-specific demethylase 3A	31198	57807.7	28824.7	49532.5	42264.7	14640.2	24714.3	49985.4	0.645346	0.461513	0.392549
sp|P24788|CD11B_MOUSE	P24788	CD11B_MOUSE	Cdk11b	Cyclin-dependent kinase 11B	41767.5	53550.4	40401.7	36932.3	39146.9	21833.1	41167.5	50959	0.644412	0.342767	0.59528
sp|Q9D0N7|CAF1B_MOUSE	Q9D0N7	CAF1B_MOUSE	Chaf1b	Chromatin assembly factor 1 subunit B	20922	69594	17838.2	42789.3	45180.6	12818.2	22222.9	47851.4	0.64215	0.0639473	0.27286
sp|P97386|DNLI3_MOUSE	P97386	DNLI3_MOUSE	Lig3	DNA ligase 3	30320.5	57895.5	20917.7	48690.1	37415.7	19151.9	29119.8	51918.1	0.641064	0.299273	0.518619
sp|Q9D0B0|SRSF9_MOUSE	Q9D0B0	SRSF9_MOUSE	Srsf9	Serine/arginine-rich splicing factor 9	68906.3	27453.8	49657.1	23355.9	20882.6	40966.7	82043.8	55308	0.639676	0.239396	1.15104
tr|D3YTQ3|D3YTQ3_MOUSE	D3YTQ3	D3YTQ3_MOUSE	Hnrnpdl	Heterogeneous nuclear ribonucleoprotein D-like	64480.6	37961	38733.4	26974.6	26996.7	38779.7	51316.2	50627.1	0.63916	-0.00150016	0.632125
tr|A2A654|A2A654_MOUSE	A2A654	A2A654_MOUSE	Bptf	Protein Bptf	45913.7	54268.7	22895.5	39139.2	33230.6	31158.1	40892.3	53768.4	0.63775	-0.0537319	0.555957
sp|A2AHJ4|BRWD3_MOUSE	A2AHJ4	BRWD3_MOUSE	Brwd3	Bromodomain and WD repeat-containing protein 3	32669.1	53654.2	21986.2	35384.8	34031	21499.3	27122.3	65736.1	0.636473	0.047044	0.741754
sp|Q91YU8|SSF1_MOUSE	Q91YU8	SSF1_MOUSE	Ppan	Suppressor of SWI4 1 homolog	28962.7	48307.2	15664.1	40532.4	33596.2	16157.2	42322.4	65871.1	0.635112	0.175686	1.12075
tr|E9PWT1|E9PWT1_MOUSE	E9PWT1	E9PWT1_MOUSE	Trrap	Transformation/transcription domain-associated protein	32197	58541.4	12536.4	37686.6	35808.5	22700	28172.8	65826	0.633067	-0.220298	0.683998
sp|Q80SY5|PR38B_MOUSE	Q80SY5	PR38B_MOUSE	Prpf38b	Pre-mRNA-splicing factor 38B	22331.1	29086.4	18025.4	20506.6	20100.6	13226.5	79901.8	106619	0.625562	0.209361	2.48457
tr|A2A7V0|A2A7V0_MOUSE	A2A7V0	A2A7V0_MOUSE	Zfp600	Protein Zfp600	38048.2	59723.6	18173.8	37043.3	43414.5	20027.8	36014.4	54926.7	0.623974	-0.200328	0.519489
sp|P97452|BOP1_MOUSE	P97452	BOP1_MOUSE	Bop1	Ribosome biogenesis protein BOP1	35536.4	47775.3	28717.6	41669.8	28680.2	25390.1	58898.5	51265.6	0.623683	0.380481	1.02675
sp|Q9CSH3|RRP44_MOUSE	Q9CSH3	RRP44_MOUSE	Dis3	Exosome complex exonuclease RRP44	16147.9	63175	17504.2	51943.6	36600.9	14927.3	23793.7	55408.3	0.622376	0.430568	0.620175
sp|Q9CQ22|LTOR1_MOUSE	Q9CQ22	LTOR1_MOUSE	Lamtor1	Ragulator complex protein LAMTOR1	34175	82779.4	63894.5	17613	28298	47809.1	35643.2	26795.3	0.619844	0.0989028	-0.285595
sp|Q91ZW3|SMCA5_MOUSE	Q91ZW3	SMCA5_MOUSE	Smarca5	SWI/SNF-related matrix-associated actin-dependent regulator of chromatin subfamily A member 5	37109.9	51168.7	23111.8	43722.5	36908.4	20570.8	34871.1	57925	0.619023	0.217548	0.691023
sp|Q6NZN0|RBM26_MOUSE	Q6NZN0	RBM26_MOUSE	Rbm26	RNA-binding protein 26	43235.3	42133.6	35345.6	37733.3	25876.6	29858.7	62514.6	55508.5	0.615119	0.390863	1.08241
tr|Q3U821|Q3U821_MOUSE	Q3U821	Q3U821_MOUSE	Wdr75	Protein Wdr75	27273.2	54848.2	19502.3	41399	36518.8	17113.8	34773.7	58897.1	0.61465	0.183366	0.804491
sp|P26369|U2AF2_MOUSE	P26369	U2AF2_MOUSE	U2af2	Splicing factor U2AF 65 kDa subunit	41104.6	36134.9	24695.9	29651.4	26476.1	24028.6	63389.1	73680.1	0.612922	0.10579	1.44042
sp|O70554|SPR2B_MOUSE	O70554	SPR2B_MOUSE	Sprr2b	Small proline-rich protein 2B	81687.7	41891.3	53480.1	35386.6	32141.2	48750.8	48736.9	20022.5	0.611365	0.135646	-0.234441
sp|Q80VY9|DHX33_MOUSE	Q80VY9	DHX33_MOUSE	Dhx33	Putative ATP-dependent RNA helicase DHX33	48739.4	49439.2	23326.9	35537.1	27383.5	37038.5	47333.4	51583.6	0.607855	-0.130165	0.618665
sp|Q91VE0|S27A4_MOUSE	Q91VE0	S27A4_MOUSE	Slc27a4	Long-chain fatty acid transport protein 4	44222	58269.6	28010.6	37885.4	32246.4	35094.2	27959.4	50340	0.605957	-0.0312855	0.217525
sp|Q8BIZ6|SNIP1_MOUSE	Q8BIZ6	SNIP1_MOUSE	Snip1	Smad nuclear-interacting protein 1	30255.6	61332.2	20668.2	41417.9	35990	24201.1	28540.8	58123.8	0.605606	0.04472	0.525893
sp|Q6PDM2|SRSF1_MOUSE	Q6PDM2	SRSF1_MOUSE	Srsf1	Serine/arginine-rich splicing factor 1	55960.6	23139.6	32716.4	19503.8	20435.6	31599.1	104341	70549.5	0.604206	0.00513286	1.74891
sp|Q9R0L7|AKP8L_MOUSE	Q9R0L7	AKP8L_MOUSE	Akap8l	A-kinase anchor protein 8-like	52184.9	35323.3	60155.1	31696.2	29707.6	27909.9	59967.6	56482.5	0.602912	0.672793	1.01513
sp|Q9JIK5|DDX21_MOUSE	Q9JIK5	DDX21_MOUSE	Ddx21	Nucleolar RNA helicase 2	22252.1	60589.6	11299	53121.9	45925.3	8644.21	27732.2	46780	0.602263	0.239433	0.449381
sp|Q0VEE6|ZN800_MOUSE	Q0VEE6	ZN800_MOUSE	Znf800	Zinc finger protein 800	37898.8	51056.6	12540.4	35402.1	31749	26893.8	31825.1	68738.5	0.601128	-0.290647	0.778083
sp|Q9CXJ1|SYEM_MOUSE	Q9CXJ1	SYEM_MOUSE	Ears2	Probable glutamate--tRNA ligase, mitochondrial	34191.4	53336.2	31207.9	54189.3	30758.3	26952.7	33098.1	50837.2	0.600891	0.565343	0.540432
sp|Q91VN6|DDX41_MOUSE	Q91VN6	DDX41_MOUSE	Ddx41	Probable ATP-dependent RNA helicase DDX41	30874.1	53519.2	28180.7	48021.9	35108.2	20542.2	38660.9	55015	0.600737	0.453447	0.751286
sp|Q8R3C6|RBM19_MOUSE	Q8R3C6	RBM19_MOUSE	Rbm19	Probable RNA-binding protein 19	29876.4	52389.6	24409.7	39992.5	31290.5	23137.5	33343.9	57632	0.595945	0.24276	0.741134
sp|Q61033|LAP2A_MOUSE	Q61033	LAP2A_MOUSE	Tmpo	Lamina-associated polypeptide 2, isoforms alpha/zeta	16612.3	69825.9	14298.7	51952.5	45658	11540.3	23325.9	48305	0.595696	0.211972	0.32461
sp|Q80TP3|UBR5_MOUSE	Q80TP3	UBR5_MOUSE	Ubr5	E3 ubiquitin-protein ligase UBR5	16403.8	74209.8	17216.4	53027.5	42143.5	17843.6	22817.3	38834	0.595074	0.227718	0.0394782
sp|Q8BHK9|ERC6L_MOUSE	Q8BHK9	ERC6L_MOUSE	Ercc6l	DNA excision repair protein ERCC-6-like	12215.6	73884.6	16883.6	55754.6	47068	9985.88	12258.3	43973.1	0.593693	0.348405	-0.0209487
sp|Q8VIG1|REST_MOUSE	Q8VIG1	REST_MOUSE	Rest	RE1-silencing transcription factor	34829.9	49287	28230.3	40491.8	33952.2	21790.7	53516.8	53740.7	0.593606	0.301984	0.944217
sp|Q6PGG6|GNL3L_MOUSE	Q6PGG6	GNL3L_MOUSE	Gnl3l	Guanine nucleotide-binding protein-like 3-like protein	28174.7	63193.9	19076.8	45106.1	45137.3	15443	29198.1	48257.7	0.592849	0.0833408	0.354526
sp|Q80U93|NU214_MOUSE	Q80U93	NU214_MOUSE	Nup214	Nuclear pore complex protein Nup214	20639.4	61171.7	14759.5	41941.7	39574.7	14671.4	24321.3	61731	0.592779	0.063862	0.665696
sp|Q6DFV5|HELZ_MOUSE	Q6DFV5	HELZ_MOUSE	Helz	Probable helicase with zinc finger domain	17853.5	67818.7	13337.4	48116.6	48051.2	8762.31	21029.8	46222.4	0.592592	0.113272	0.243347
sp|Q62315|JARD2_MOUSE	Q62315	JARD2_MOUSE	Jarid2	Protein Jumonji	28395.2	57106.4	18183.7	41153.5	38408.9	18340.6	27258.1	59966.6	0.591345	0.0643287	0.620129
tr|E9PWG6|E9PWG6_MOUSE	E9PWG6	E9PWG6_MOUSE	Ncapg	Protein Ncapg	24293.7	73197.2	15184.4	52840.4	50670	14130.1	11516.6	35759.1	0.58927	0.0700635	-0.454899
sp|Q80Y84|KDM5B_MOUSE	Q80Y84	KDM5B_MOUSE	Kdm5b	Lysine-specific demethylase 5B	25296.8	62359.8	31629.5	42874.6	38340.5	19954	24579.3	52401.1	0.588502	0.35396	0.401132
sp|Q3U1G5|I20L2_MOUSE	Q3U1G5	I20L2_MOUSE	Isg20l2	Interferon-stimulated 20 kDa exonuclease-like 2	31197.1	51621.5	22195.5	46795.9	34437.8	20650.8	38940.6	54645.6	0.588199	0.324662	0.76454
sp|Q91YI6|GLD2_MOUSE	Q91YI6	GLD2_MOUSE	Papd4	Poly(A) RNA polymerase GLD2	26457.3	60348.6	31072.4	36102.9	27300.4	30474.5	35725.5	60076.6	0.58735	0.217488	0.729613
sp|P54729|NUB1_MOUSE	P54729	NUB1_MOUSE	Nub1	NEDD8 ultimate buster 1	6722.09	79336.9	13715.9	62311.7	51230.9	6149.72	9939.2	42643	0.584761	0.40596	-0.125991
sp|Q99J62|RFC4_MOUSE	Q99J62	RFC4_MOUSE	Rfc4	Replication factor C subunit 4	20227.4	61640.5	12811.9	58552.6	46509.2	8141.99	15078.5	52235.3	0.583045	0.384954	0.300649
sp|Q9D1P2|KAT8_MOUSE	Q9D1P2	KAT8_MOUSE	Kat8	Histone acetyltransferase KAT8	27691.6	44523.3	38033.5	49812.2	21575.6	26652	79849.1	47166.2	0.582438	0.865112	1.39707
sp|Q6P2B1|TNPO3_MOUSE	Q6P2B1	TNPO3_MOUSE	Tnpo3	Transportin-3	24022.5	68969.9	22902.8	52238.8	38754.9	23415.8	24824.3	39827.7	0.580877	0.273377	0.0564597
tr|A2ANY6|A2ANY6_MOUSE	A2ANY6	A2ANY6_MOUSE	Mdn1	Midasin	23839.3	64201.7	20570.5	45470.4	41000.4	17860.5	28186.9	50481.8	0.580867	0.166052	0.418482
sp|Q8K2Z4|CND1_MOUSE	Q8K2Z4	CND1_MOUSE	Ncapd2	Condensin complex subunit 1	17646.4	73886.2	12190.6	58638.3	48079	13156	13505.5	39081.9	0.57993	0.209982	-0.219637
sp|Q9CQF3|CPSF5_MOUSE	Q9CQF3	CPSF5_MOUSE	Nudt21	Cleavage and polyadenylation specificity factor subunit 5	30307.5	32333	22473.9	29456.3	20681.7	21231.3	67719.9	89314.5	0.579698	0.309177	1.90561
sp|B2RY56|RBM25_MOUSE	B2RY56	RBM25_MOUSE	Rbm25	RNA-binding protein 25	31514.4	28563.7	18535	26223.4	17727.7	22502.4	115477	76331.9	0.578565	0.153883	2.25333
sp|Q9WVF7|DPOE1_MOUSE	Q9WVF7	DPOE1_MOUSE	Pole	DNA polymerase epsilon catalytic subunit A	28679.4	58150.4	25327.7	40977.9	35950	22229.5	43737.8	49605.8	0.577678	0.188619	0.68204
sp|Q8CGC6|RBM28_MOUSE	Q8CGC6	RBM28_MOUSE	Rbm28	RNA-binding protein 28	27725.3	51496.1	18354.1	44901.3	37815.7	15333.6	43929.8	56688.4	0.575839	0.251138	0.920769
sp|Q8BZH4|POGZ_MOUSE	Q8BZH4	POGZ_MOUSE	Pogz	Pogo transposable element with ZNF domain	31541	57181.6	19109.6	45706.2	39401.7	20138.6	28644.4	56898.1	0.575435	0.12248	0.522774
sp|Q9CTH6|FCF1_MOUSE	Q9CTH6	FCF1_MOUSE	Fcf1	rRNA-processing protein FCF1 homolog	28190.9	57255.6	26935.2	48423.7	38128.8	19235.3	41422.4	48886.7	0.574872	0.393628	0.654723
sp|Q8C3Y4|KNTC1_MOUSE	Q8C3Y4	KNTC1_MOUSE	Kntc1	Kinetochore-associated protein 1	17223	76048.7	20103.9	43305.8	48721.3	13910.9	13983.7	43242.3	0.574533	0.0177977	-0.130235
sp|Q6ZQH8|NU188_MOUSE	Q6ZQH8	NU188_MOUSE	Nup188	Nucleoporin NUP188 homolog	27032	56670.5	19377.1	40478.7	37401.4	18809	30879.5	58874.2	0.574434	0.0906554	0.675135
sp|Q8K3Y3|LN28A_MOUSE	Q8K3Y3	LN28A_MOUSE	Lin28a	Protein lin-28 homolog A	32113.5	47027.4	31375.5	54748.6	28618.7	24529.7	56756.9	41252.5	0.574396	0.69639	0.882893
sp|Q8R2Y9|SOSB1_MOUSE	Q8R2Y9	SOSB1_MOUSE	Nabp2	SOSS complex subunit B1	49621.6	41158.7	29877.2	39718.9	31004.4	30012.7	50838.3	52526.5	0.573167	0.189795	0.76046
sp|P68433|H31_MOUSE	P68433	H31_MOUSE	Hist1h3a	Histone H3.1	39322.3	44784	35397.4	42260	34300.9	22359.2	33802.1	61084.8	0.569881	0.454788	0.743875
sp|P27659|RL3_MOUSE	P27659	RL3_MOUSE	Rpl3	60S ribosomal protein L3	23261.3	60001	18179	50534.4	40427.9	15762.9	35439.4	44158.8	0.567329	0.290256	0.502401
sp|Q6DID5|MUM1_MOUSE	Q6DID5	MUM1_MOUSE	Mum1	PWWP domain-containing protein MUM1	37788.3	51947.8	28487.8	40219.3	37629.2	23150.2	33874.3	56552.1	0.562107	0.176877	0.573162
sp|Q6PGB8|SMCA1_MOUSE	Q6PGB8	SMCA1_MOUSE	Smarca1	Probable global transcription activator SNF2L1	37190.6	53424.1	23291.6	42446.6	39693.8	21704.4	32597	54711.4	0.561547	0.0985338	0.507923
sp|O70157|TOP3A_MOUSE	O70157	TOP3A_MOUSE	Top3a	DNA topoisomerase 3-alpha	65537.3	41618.2	45970.3	34789.4	33215.7	39393	70961.8	37699.4	0.561492	0.153495	0.581623
tr|Q6PGF5|Q6PGF5_MOUSE	Q6PGF5	Q6PGF5_MOUSE	Bms1	BMS1 homolog, ribosome assembly protein (Yeast)	29219.7	54490.2	21002.4	38267.1	34798.4	21952.2	37803	63680.4	0.560761	0.0626525	0.838535
sp|Q9D8M4|RL7L_MOUSE	Q9D8M4	RL7L_MOUSE	Rpl7l1	60S ribosomal protein L7-like 1	39845	48860.9	31574.4	35504.6	34962.1	25270.7	38544.3	60192.2	0.558482	0.155314	0.713037
sp|Q8R4R6|NUP53_MOUSE	Q8R4R6	NUP53_MOUSE	Nup35	Nucleoporin NUP53	101617	39135.9	49310.8	41608.3	32509.5	63202.2	42915.4	17377.1	0.556396	-0.0741106	-0.666715
sp|Q8BTT6|DIEXF_MOUSE	Q8BTT6	DIEXF_MOUSE	Diexf	Digestive organ expansion factor homolog	17818.1	54521.9	14923	46106.2	34676.9	14521.4	27627.1	68285.4	0.556184	0.31089	0.963109
tr|E9Q4F8|E9Q4F8_MOUSE	E9Q4F8	E9Q4F8_MOUSE	Ankrd11	Protein Ankrd11	49646.1	37750.2	46776.4	36076.7	27149.7	32303.6	56662.5	56505.7	0.555815	0.478798	0.928639
sp|Q8CG47|SMC4_MOUSE	Q8CG47	SMC4_MOUSE	Smc4	Structural maintenance of chromosomes protein 4	31800.5	64671.5	23591.7	51136.7	46107.1	19590.8	17954.9	42964.4	0.554263	0.185809	-0.108947
sp|Q8R3P6|VWA9_MOUSE	Q8R3P6	VWA9_MOUSE	Vwa9	von Willebrand factor A domain-containing protein 9	40015.4	48083.9	38199.8	43860.5	31493	28557.7	41113.9	49792.2	0.552949	0.450503	0.598195
sp|Q69ZA1|CDK13_MOUSE	Q69ZA1	CDK13_MOUSE	Cdk13	Cyclin-dependent kinase 13	94547	25593.5	174465	15951.6	23289.6	58627.5	44152.7	11193.1	0.552487	1.21692	-0.565691
sp|Q9Z0W3|NU160_MOUSE	Q9Z0W3	NU160_MOUSE	Nup160	Nuclear pore complex protein Nup160	25466	58085.2	16964.2	40713.1	40158.5	16881.4	31870	57755.5	0.550688	0.0160315	0.651938
sp|Q9R1C7|PR40A_MOUSE	Q9R1C7	PR40A_MOUSE	Prpf40a	Pre-mRNA-processing factor 40 homolog A	26837.6	21868.5	16706.2	13897.1	14349.7	18968.7	114527	102862	0.547781	-0.122636	2.70589
sp|O09167|RL21_MOUSE	O09167	RL21_MOUSE	Rpl21	60S ribosomal protein L21	45863.5	48753.2	40901.4	48948.2	36784.5	27974.8	38699.6	37740.6	0.547007	0.472424	0.239244
sp|P37913|DNLI1_MOUSE	P37913	DNLI1_MOUSE	Lig1	DNA ligase 1	14159	73443.3	16776.2	53969.1	44027.3	15981.2	18977.2	43320.7	0.545804	0.237468	0.0540164
sp|P83882|RL36A_MOUSE	P83882	RL36A_MOUSE	Rpl36a	60S ribosomal protein L36a	59421.9	42761.8	35165.8	44023.2	38927.2	31102.7	45250.1	39895.9	0.545121	0.177328	0.281969
sp|Q8R2S9|ARP8_MOUSE	Q8R2S9	ARP8_MOUSE	Actr8	Actin-related protein 8	24109	56917.5	20955	47023.4	33664.6	21982	37410.3	55302.2	0.542102	0.288783	0.736471
sp|P37889|FBLN2_MOUSE	P37889	FBLN2_MOUSE	Fbln2	Fibulin-2	58844.6	45457.5	53541.7	38464.1	20232.7	51450.9	72022.5	22114.9	0.541053	0.360081	0.393125
sp|Q9R226|KHDR3_MOUSE	Q9R226	KHDR3_MOUSE	Khdrbs3	KH domain-containing, RNA-binding, signal transduction-associated protein 3	49789.3	41050.1	17518.9	32877	29633.3	32835.6	60819.1	55710.8	0.540181	-0.309832	0.89949
sp|Q99MX1|UBP26_MOUSE	Q99MX1	UBP26_MOUSE	Usp26	Ubiquitin carboxyl-terminal hydrolase 26	20433.7	65030.4	21009.7	51307	37304.9	21513.3	27859.6	46004.3	0.539056	0.298068	0.328606
sp|P59178|LMBL2_MOUSE	P59178	LMBL2_MOUSE	L3mbtl2	Lethal(3)malignant brain tumor-like protein 2	31057.7	58496	22856.4	47958.4	39217.6	22473.9	31565.6	46822.9	0.537681	0.198979	0.34557
sp|Q8CCG4|DPPA4_MOUSE	Q8CCG4	DPPA4_MOUSE	Dppa4	Developmental pluripotency-associated protein 4	33666.4	50555.6	21067.6	52947.2	40143.3	17884.3	33191.4	52023.7	0.537455	0.351072	0.554368
sp|Q99PP7|TRI33_MOUSE	Q99PP7	TRI33_MOUSE	Trim33	E3 ubiquitin-protein ligase TRIM33	30280.9	67011.3	29588.7	47463.9	41618.5	25441.5	25987.2	42995.5	0.536871	0.200389	0.0407793
sp|Q9CR57|RL14_MOUSE	Q9CR57	RL14_MOUSE	Rpl14	60S ribosomal protein L14	29351.3	41459	21064.2	36740.3	31967.7	16857.7	93626.4	54543.5	0.536327	0.243547	1.60155
sp|P35601|RFC1_MOUSE	P35601	RFC1_MOUSE	Rfc1	Replication factor C subunit 1	31614.7	60699.2	25595.6	41174.6	40434.2	23227	38533.5	48869.3	0.536133	0.0687872	0.457264
sp|Q9D666|SUN1_MOUSE	Q9D666	SUN1_MOUSE	Sun1	SUN domain-containing protein 1	30905.6	55435.7	14822.4	42860.5	44179.6	15572.6	28362.1	48461.7	0.531058	-0.0508479	0.36256
sp|Q6RT24|CENPE_MOUSE	Q6RT24	CENPE_MOUSE	Cenpe	Centromere-associated protein E	33674.2	65756.7	32189.5	42839.4	46028.8	22814.4	22157.3	36941	0.530383	0.124134	-0.220195
tr|A2A7F4|A2A7F4_MOUSE	A2A7F4	A2A7F4_MOUSE	Rlf	Insulin-like 3	40762.6	55928.2	15373.1	45243.7	35810.1	31139.7	43488.1	45539.6	0.5303	-0.143363	0.411176
sp|Q8CIM8|INT4_MOUSE	Q8CIM8	INT4_MOUSE	Ints4	Integrator complex subunit 4	31151.4	54569.1	28817.7	42400	36293.3	23090.5	31443.2	56701.5	0.529574	0.262169	0.569808
sp|O70230|ZN143_MOUSE	O70230	ZN143_MOUSE	Znf143	Zinc finger protein 143	33169.9	63332.5	39678.1	35575.6	38526.6	28351	29701	50415.8	0.529042	0.170239	0.260581
sp|Q7TPQ3|SHPRH_MOUSE	Q7TPQ3	SHPRH_MOUSE	Shprh	E3 ubiquitin-protein ligase SHPRH	27697.3	60533.9	21713.8	42764.4	35711.1	25465.4	33168	52553.6	0.528312	0.0758333	0.486681
sp|Q3TZX8|NOL9_MOUSE	Q3TZX8	NOL9_MOUSE	Nol9	Polynucleotide 5'-hydroxyl-kinase NOL9	26140.8	54671.3	17137.8	44014.8	39307.6	16760.2	30026.8	60058.2	0.527398	0.125241	0.684114
sp|Q62318|TIF1B_MOUSE	Q62318	TIF1B_MOUSE	Trim28	Transcription intermediary factor 1-beta	27125.6	67772.9	28359.2	48559.8	42700.6	23202.3	24621.9	37119.1	0.526043	0.222999	-0.0941147
sp|Q99LI5|ZN281_MOUSE	Q99LI5	ZN281_MOUSE	Znf281	Zinc finger protein 281	23724.5	67651.8	12256.3	41669	48846.6	14646.2	23259.7	50800.3	0.525227	-0.235628	0.222103
sp|Q99P88|NU155_MOUSE	Q99P88	NU155_MOUSE	Nup155	Nuclear pore complex protein Nup155	28341.6	57636.6	19891.8	43768.6	40600.3	19199.7	32789.1	53870.6	0.523825	0.0902506	0.535216
sp|Q8BJW7|EME1_MOUSE	Q8BJW7	EME1_MOUSE	Eme1	Crossover junction endonuclease EME1	27242.9	62770.2	21387.9	42352.4	42100.7	20506.6	43019.9	53168.2	0.523803	0.0258741	0.619527
sp|Q8CDG3|VCIP1_MOUSE	Q8CDG3	VCIP1_MOUSE	Vcpip1	Deubiquitinating protein VCIP135	28140.7	65629.5	37868.1	50724.5	34351.9	30876.3	20108.6	41891.7	0.523634	0.44169	-0.0732197
sp|Q9EP97|SENP3_MOUSE	Q9EP97	SENP3_MOUSE	Senp3	Sentrin-specific protease 3	22678.7	62554.9	18864.9	44707.9	42713.8	16826.8	26166.3	54077.5	0.517548	0.0945367	0.430517
sp|Q64511|TOP2B_MOUSE	Q64511	TOP2B_MOUSE	Top2b	DNA topoisomerase 2-beta	35613.8	54720.1	23541.3	44773.4	40227.6	22892.5	36597.9	51697.3	0.517168	0.114098	0.484236
sp|Q587J6|LITD1_MOUSE	Q587J6	LITD1_MOUSE	L1td1	LINE-1 type transposase domain-containing protein 1	15500.4	70099.1	7999.92	54891.7	53722.7	6241.54	18025.9	40406.7	0.513501	0.0687671	-0.0373304
sp|Q99MV7|RNF17_MOUSE	Q99MV7	RNF17_MOUSE	Rnf17	RING finger protein 17	9168.45	73935.2	13634.1	59529.5	47278.3	10998.9	12401.9	44368.2	0.511981	0.328193	-0.0377991
sp|P13542|MYH8_MOUSE	P13542	MYH8_MOUSE	Myh8	Myosin-8	34507.9	10709.2	21110.8	11470.4	13409.3	18333.5	332276	21297.8	0.510442	0.0376154	3.47751
sp|Q69Z99|ZN512_MOUSE	Q69Z99	ZN512_MOUSE	Znf512	Zinc finger protein 512	46662.5	45462.4	54178.9	32700.5	35773.6	28946.8	46135.8	49874	0.509369	0.424792	0.568959
sp|P54731|FAF1_MOUSE	P54731	FAF1_MOUSE	Faf1	FAS-associated factor 1	25235.7	61478.7	46374.8	56520.1	37257.3	23666.7	17540.3	46113.6	0.50926	0.756089	0.0632378
sp|Q8R2N2|CIR1A_MOUSE	Q8R2N2	CIR1A_MOUSE	Cirh1a	Cirhin	28933.9	51323.2	24734.8	40878.5	35958	20472.3	40146.1	58042.8	0.508162	0.21752	0.799092
tr|Q6NZL1|Q6NZL1_MOUSE	Q6NZL1	Q6NZL1_MOUSE	Dhx37	DEAH (Asp-Glu-Ala-His) box polypeptide 37	23827.6	55074	27190.8	37273.4	38459.1	17049.1	38047.4	59085.3	0.507356	0.215798	0.807258
sp|O88508|DNM3A_MOUSE	O88508	DNM3A_MOUSE	Dnmt3a	DNA (cytosine-5)-methyltransferase 3A	33461.1	50466.5	17683.9	38970.1	32542.9	26527.9	33904.2	66158.2	0.5067	-0.0602679	0.760384
sp|Q9CQQ7|AT5F1_MOUSE	Q9CQQ7	AT5F1_MOUSE	Atp5f1	ATP synthase F(0) complex subunit B1, mitochondrial	36453.1	41964.5	42092.9	46708.4	35207	20051.8	31998	56021.1	0.504974	0.684378	0.671614
sp|P35980|RL18_MOUSE	P35980	RL18_MOUSE	Rpl18	60S ribosomal protein L18	22549.7	54789.1	26899.2	47310.5	41611	12965.2	39856.5	47710.3	0.502919	0.443336	0.682113
sp|P97868|RBBP6_MOUSE	P97868	RBBP6_MOUSE	Rbbp6	E3 ubiquitin-protein ligase RBBP6	26199.6	36924.9	31396.7	38272.8	32736.4	11820	74847.6	64767.8	0.502571	0.644896	1.64776
tr|F6RGI3|F6RGI3_MOUSE	F6RGI3	F6RGI3_MOUSE	Gm340	Protein Gm340	47923.7	43809.8	25336.2	35234.4	31906.4	32891.1	35443.9	61892	0.501511	-0.0973186	0.587035
sp|Q9CR47|NSA2_MOUSE	Q9CR47	NSA2_MOUSE	Nsa2	Ribosome biogenesis protein NSA2 homolog	26670.5	53772.1	20508.6	41637.9	39454.3	17418.7	33200	60914.1	0.500216	0.127928	0.726667
sp|Q8BMQ2|TF3C4_MOUSE	Q8BMQ2	TF3C4_MOUSE	Gtf3c4	General transcription factor 3C polypeptide 4	37550.5	56375.3	35110.1	45650.8	32029.2	34415	32232.3	46817.7	0.499379	0.281513	0.250624
sp|Q3TQQ9|CA112_MOUSE	Q3TQQ9	CA112_MOUSE	>sp|Q3TQQ9|CA112_MOUSE	Uncharacterized protein C1orf112 homolog	28073.1	75292.5	18987.5	45908.8	50714.5	22414.1	23206.2	37462.7	0.499249	-0.1723	-0.269477
tr|Q8BVY0|Q8BVY0_MOUSE	Q8BVY0	Q8BVY0_MOUSE	Rsl1d1	Protein Rsl1d1	22534.9	47938.2	16127.7	43782.7	37752.7	12158.4	40752.7	63835.2	0.497711	0.263445	1.06728
sp|P35288|RAB23_MOUSE	P35288	RAB23_MOUSE	Rab23	Ras-related protein Rab-23	53977.7	61310.5	44391.6	42098.2	44415.4	37337.4	19716.9	40775.3	0.495906	0.0812637	-0.434519
sp|Q8C796|RCOR2_MOUSE	Q8C796	RCOR2_MOUSE	Rcor2	REST corepressor 2	23726.8	62896.6	19731.3	58437.9	41289.9	20141.5	22746	44122.8	0.495778	0.347623	0.122356
sp|P15864|H12_MOUSE	P15864	H12_MOUSE	Hist1h1c	Histone H1.2	67357.7	22413.2	56138.9	25441.5	20707.2	43036.7	122663	34029.8	0.493959	0.355935	1.29758
sp|Q9CQG2|MET16_MOUSE	Q9CQG2	MET16_MOUSE	Mettl16	Methyltransferase-like protein 16	19381.4	71039.2	22203.8	51099.2	36567.8	27648.4	24528.4	47361.5	0.493715	0.190935	0.162851
sp|Q99NH2|PARD3_MOUSE	Q99NH2	PARD3_MOUSE	Pard3	Partitioning defective 3 homolog	27962.6	62183.5	25375	56015.6	22664.8	41427.5	45604	22917.2	0.492112	0.344711	0.096398
sp|Q8BJ05|ZC3HE_MOUSE	Q8BJ05	ZC3HE_MOUSE	Zc3h14	Zinc finger CCCH domain-containing protein 14	41430.2	43014.2	34445.6	36090.1	33592.7	26476.4	55205.8	53860.9	0.491379	0.231731	0.860515
sp|P97820|M4K4_MOUSE	P97820	M4K4_MOUSE	Map4k4	Mitogen-activated protein kinase kinase kinase kinase 4	22634	59681.2	23418.6	44338.1	33758.5	24900.6	32710.2	53102.1	0.488805	0.20801	0.548831
sp|Q9DC23|DJC10_MOUSE	Q9DC23	DJC10_MOUSE	Dnajc10	DnaJ homolog subfamily C member 10	38953.3	47140.6	38032.5	36759.3	32824.6	28552	38653.7	52968.4	0.488224	0.285192	0.578009
sp|Q8C176|TAF2_MOUSE	Q8C176	TAF2_MOUSE	Taf2	Transcription initiation factor TFIID subunit 2	30956.7	55303.3	21526.6	35911.1	30354.9	31142.1	37076.5	60138.2	0.488174	-0.0985203	0.660657
sp|Q9WTX8|MD1L1_MOUSE	Q9WTX8	MD1L1_MOUSE	Mad1l1	Mitotic spindle assembly checkpoint protein MAD1	28678.9	61738.7	24143.2	43565.4	39112.6	25440.5	25936.9	55074.5	0.486119	0.0688531	0.32764
sp|P62267|RS23_MOUSE	P62267	RS23_MOUSE	Rps23	40S ribosomal protein S23	47107.2	39672	32594.1	48887.2	35375.3	26652	43419.6	47576.8	0.484446	0.393565	0.552905
sp|Q08943|SSRP1_MOUSE	Q08943	SSRP1_MOUSE	Ssrp1	FACT complex subunit SSRP1	53142.5	49670.8	38659.2	41198.3	21044.3	52557.2	54570.3	35799.3	0.482219	0.117692	0.296104
sp|P41230|KDM5C_MOUSE	P41230	KDM5C_MOUSE	Kdm5c	Lysine-specific demethylase 5C	16333.1	71801.8	23610.6	53937.4	45140.5	18005.3	18282.8	42241.2	0.481027	0.296403	-0.0611778
sp|P33611|DPOA2_MOUSE	P33611	DPOA2_MOUSE	Pola2	DNA polymerase alpha subunit B	30055.9	54258.6	35835.5	50846.1	33598.5	26848.9	28380.6	46695.2	0.480097	0.520043	0.312667
sp|Q8CEC0|NUP88_MOUSE	Q8CEC0	NUP88_MOUSE	Nup88	Nuclear pore complex protein Nup88	20314.5	54762	11122.6	51489.6	44750.8	9098.01	26887.3	57486.2	0.479448	0.217529	0.647877
sp|P46935|NEDD4_MOUSE	P46935	NEDD4_MOUSE	Nedd4	E3 ubiquitin-protein ligase NEDD4	15391.4	66408.5	15873.2	61239.4	45519.8	13156.2	13657.9	43730.4	0.479329	0.394195	-0.0320138
sp|O08550|KMT2B_MOUSE	O08550	KMT2B_MOUSE	Kmt2b	Histone-lysine N-methyltransferase 2B	32120.2	52661.3	27368.6	38626.8	43389.3	17460.1	36298	55778.5	0.478506	0.11712	0.597589
sp|Q62018|CTR9_MOUSE	Q62018	CTR9_MOUSE	Ctr9	RNA polymerase-associated protein CTR9 homolog	40569.6	43886.4	27542.9	34731.8	34112.5	26524.8	42885.5	61771	0.477992	0.0384397	0.787384
sp|Q91WG4|ELP2_MOUSE	Q91WG4	ELP2_MOUSE	Elp2	Elongator complex protein 2	13744.3	61334.5	22390.7	52447.9	40682.1	13227.4	24196.6	49954.7	0.477868	0.473245	0.459933
sp|Q9CU65|ZMYM2_MOUSE	Q9CU65	ZMYM2_MOUSE	Zmym2	Zinc finger MYM-type protein 2	23947.4	60805.1	15891.5	45738.4	44857.7	16032.4	20562.8	57622.9	0.477046	0.0174221	0.360695
sp|P97496|SMRC1_MOUSE	P97496	SMRC1_MOUSE	Smarcc1	SWI/SNF complex subunit SMARCC1	15797	59990.6	15875.4	46017	43918.1	10570.4	27243.6	63254.5	0.47601	0.18381	0.731936
tr|B7ZNL9|B7ZNL9_MOUSE	B7ZNL9	B7ZNL9_MOUSE	Tatdn2	Protein Tatdn2	45766	35382.4	25679.2	23880.2	26913.3	31433.8	69266	70055.3	0.475902	-0.235501	1.25568
sp|Q64378|FKBP5_MOUSE	Q64378	FKBP5_MOUSE	Fkbp5	Peptidyl-prolyl cis-trans isomerase FKBP5	14263.7	66849.7	18725.8	54684.4	45797.3	12609.6	10947	50507.4	0.473803	0.329844	0.0733782
sp|B1AQJ2|UBP36_MOUSE	B1AQJ2	UBP36_MOUSE	Usp36	Ubiquitin carboxyl-terminal hydrolase 36	34183.7	52070.3	23342.9	39753.6	33588.1	28585.6	42610.3	54017.1	0.472285	0.021254	0.636126
sp|O35218|CPSF2_MOUSE	O35218	CPSF2_MOUSE	Cpsf2	Cleavage and polyadenylation specificity factor subunit 2	46594	40533.7	22926.5	35780.1	33402.6	29405.3	44850	66384.3	0.472186	-0.097422	0.824586
sp|P14115|RL27A_MOUSE	P14115	RL27A_MOUSE	Rpl27a	60S ribosomal protein L27a	35719.8	52938.4	22306.2	46988.9	34734	29212.6	40896.7	51380.8	0.471384	0.115885	0.52911
sp|Q921S7|RM37_MOUSE	Q921S7	RM37_MOUSE	Mrpl37	39S ribosomal protein L37, mitochondrial	25138.9	49386.8	73684.3	60435.2	34124.5	19745.9	20970	38477	0.468245	1.31595	0.142111
sp|Q8K363|DDX18_MOUSE	Q8K363	DDX18_MOUSE	Ddx18	ATP-dependent RNA helicase DDX18	26463.9	44926	21974	45428.3	35747.9	15898.8	44742	61888.7	0.467043	0.384121	1.04587
sp|Q9CXS4|CENPV_MOUSE	Q9CXS4	CENPV_MOUSE	Cenpv	Centromere protein V	29650.4	53097	16785.6	47605.4	39676.6	20246.2	35701.2	54108.3	0.46561	0.103754	0.583764
sp|Q6NVF9|CPSF6_MOUSE	Q6NVF9	CPSF6_MOUSE	Cpsf6	Cleavage and polyadenylation specificity factor subunit 6	35910.3	35623.4	30768.2	33818.2	30094.3	21812.7	48598.1	72529	0.462692	0.315301	1.22252
sp|P53569|CEBPZ_MOUSE	P53569	CEBPZ_MOUSE	Cebpz	CCAAT/enhancer-binding protein zeta	25544	54035.4	28545.6	40274.7	36731.5	21056.1	45989.1	56731.4	0.461633	0.252073	0.829891
sp|Q9WVB0|RBPMS_MOUSE	Q9WVB0	RBPMS_MOUSE	Rbpms	RNA-binding protein with multiple splicing	47390.5	38952.1	36873.9	30215.6	28418	34328	54007.1	59090.3	0.460548	0.0965631	0.84997
sp|Q8C0P0|GWL_MOUSE	Q8C0P0	GWL_MOUSE	Mastl	Serine/threonine-protein kinase greatwall	16480	71425.9	26434.8	53597.3	39044	24868.9	18777.2	37510	0.459851	0.32447	-0.183304
sp|Q9JK30-2|ORC3_MOUSE	Q9JK30-2	ORC3_MOUSE	Orc3	Isoform 2 of Origin recognition complex subunit 3	73085.8	42605.4	55295.7	37385.8	33151.8	50979.9	41670.7	37711.8	0.459557	0.13963	-0.0838293
sp|Q923B1|DBR1_MOUSE	Q923B1	DBR1_MOUSE	Dbr1	Lariat debranching enzyme	36995.3	49179.9	20389	36859.8	33419.4	29313.5	46309.3	53212.5	0.458051	-0.131977	0.665791
sp|Q8R0G9|NU133_MOUSE	Q8R0G9	NU133_MOUSE	Nup133	Nuclear pore complex protein Nup133	29983.6	55969.4	22931.7	44241.5	43526.7	19108	31391.7	51971.5	0.456587	0.100924	0.412449
sp|A6H619|PHRF1_MOUSE	A6H619	PHRF1_MOUSE	Phrf1	PHD and RING finger domain-containing protein 1	41459.7	42089.9	35722.7	31557.8	29779	31140	57962.4	59235.3	0.45574	0.143294	0.943979
sp|P16381|DDX3L_MOUSE	P16381	DDX3L_MOUSE	D1Pas1	Putative ATP-dependent RNA helicase Pl10	22934.8	60852.7	16891.9	49732.1	45617.1	15603	21630	49451.4	0.45273	0.122038	0.215469
sp|O35286|DHX15_MOUSE	O35286	DHX15_MOUSE	Dhx15	Putative pre-mRNA-splicing factor ATP-dependent RNA helicase DHX15	36195.1	37575.6	23423	37888.3	31051.3	22882.2	57784.3	68325.1	0.451869	0.184973	1.22542
sp|Q9CXV9|DCNL5_MOUSE	Q9CXV9	DCNL5_MOUSE	Dcun1d5	DCN1-like protein 5	22768.4	64018.2	32130.7	41575.3	39110.5	24365.7	32542	51221.9	0.451257	0.215566	0.400113
sp|P11276|FINC_MOUSE	P11276	FINC_MOUSE	Fn1	Fibronectin	25811.7	66940.8	28318.7	42311.6	44049.9	23806.6	34687.7	28068.3	0.450897	0.057797	-0.112735
sp|Q99LC8|EI2BA_MOUSE	Q99LC8	EI2BA_MOUSE	Eif2b1	Translation initiation factor eIF-2B subunit alpha	15914.7	72625.2	20477.8	49638.6	46861.7	18018.4	11185.3	46254.7	0.448552	0.111976	-0.17572
sp|Q3V0C5-5|UBP48_MOUSE	Q3V0C5-5	UBP48_MOUSE	Usp48	Isoform 5 of Ubiquitin carboxyl-terminal hydrolase 48	17910.5	67369.3	15606	50599.3	44546	17945.2	21527.8	49862.4	0.448551	0.0832953	0.192075
sp|Q03147|CDK7_MOUSE	Q03147	CDK7_MOUSE	Cdk7	Cyclin-dependent kinase 7	23270.3	60508.6	16954.4	53042.6	40507.9	20898	26576.3	54446.4	0.448212	0.188918	0.399951
sp|Q6PAV2|HERC4_MOUSE	Q6PAV2	HERC4_MOUSE	Herc4	Probable E3 ubiquitin-protein ligase HERC4	44739.4	48299.2	28680.1	42068.5	31239.2	37015.6	31769.8	53317.9	0.446897	0.0517704	0.31802
sp|Q8C5N3|CWC22_MOUSE	Q8C5N3	CWC22_MOUSE	Cwc22	Pre-mRNA-splicing factor CWC22 homolog	27529.6	53674.6	28071.5	34411.5	34335.2	25243.9	47804.1	58426.8	0.446748	0.0686604	0.834326
sp|Q8JZM7|CDC73_MOUSE	Q8JZM7	CDC73_MOUSE	Cdc73	Parafibromin	33439.2	48846.7	27117.2	41066.4	36220.4	24276.4	42307.9	59153.5	0.443788	0.172567	0.746002
tr|E9Q2I4|E9Q2I4_MOUSE	E9Q2I4	E9Q2I4_MOUSE	Elmsan1	Protein Elmsan1	27935.1	49488.8	32178.1	52418.7	33673.5	23279.4	40544.3	50568.1	0.443009	0.570832	0.677877
sp|Q9DCA5|BRX1_MOUSE	Q9DCA5	BRX1_MOUSE	Brix1	Ribosome biogenesis protein BRX1 homolog	24666.5	49434.6	15232.7	44689.2	40064.3	14494.3	32904.6	63036	0.441689	0.135276	0.814336
sp|Q9JIX8|ACINU_MOUSE	Q9JIX8	ACINU_MOUSE	Acin1	Apoptotic chromatin condensation inducer in the nucleus	50424.1	39379.2	38676.4	30304.6	26701.8	39479.5	68243.5	54202.6	0.440344	0.0597749	0.887651
sp|Q8BKS9|K0020_MOUSE	Q8BKS9	K0020_MOUSE	Kiaa0020	Pumilio domain-containing protein KIAA0020	23083.1	50633.6	18205.2	50104.9	30964.1	23369.5	38819.4	54831.1	0.440148	0.330256	0.785443
sp|Q80W14|PR40B_MOUSE	Q80W14	PR40B_MOUSE	Prpf40b	Pre-mRNA-processing factor 40 homolog B	31028.9	19585.3	22538.1	12225.7	10766.5	26539.2	139724	89870.6	0.440145	-0.101814	2.62162
tr|G3X9B1|G3X9B1_MOUSE	G3X9B1	G3X9B1_MOUSE	Heatr1	HEAT repeat containing 1	21160.8	59282.3	19595.7	46068.9	41666.5	17695.2	29552.3	53579.3	0.438437	0.145583	0.485865
sp|Q8VCY6|UTP6_MOUSE	Q8VCY6	UTP6_MOUSE	Utp6	U3 small nucleolar RNA-associated protein 6 homolog	30080.8	49767.2	28808.8	42930.1	34043.4	24882.6	36845.6	61578.9	0.438352	0.283851	0.740113
sp|Q7TT37|ELP1_MOUSE	Q7TT37	ELP1_MOUSE	Ikbkap	Elongator complex protein 1	16205.7	66049.5	15368.6	52528.2	44590.6	16113.2	19586.6	48971.5	0.438322	0.161558	0.175543
sp|Q9CWR8|DNM3L_MOUSE	Q9CWR8	DNM3L_MOUSE	Dnmt3l	DNA (cytosine-5)-methyltransferase 3-like	33563.4	54969.5	31674.9	45219.1	41059.8	24311.5	38966.8	42607.3	0.437557	0.234214	0.319454
sp|Q6P542|ABCF1_MOUSE	Q6P542	ABCF1_MOUSE	Abcf1	ATP-binding cassette sub-family F member 1	20474.1	63777.7	16638.5	51051.4	41408.6	20911.1	29494.7	47025	0.43502	0.119253	0.296143
tr|D3YYU8|D3YYU8_MOUSE	D3YYU8	D3YYU8_MOUSE	Obsl1	Obscurin-like protein 1	12907.8	63970.6	14801.6	55129.6	41143	15915.7	15688.8	46589.6	0.430131	0.293489	0.126284
sp|Q69ZK6|JHD2C_MOUSE	Q69ZK6	JHD2C_MOUSE	Jmjd1c	Probable JmjC domain-containing histone demethylation protein 2C	37459.5	43230.3	23466.4	34601	35653.6	24239.3	47240.3	66319.9	0.430001	-0.0446538	0.923002
sp|Q8K301|DDX52_MOUSE	Q8K301	DDX52_MOUSE	Ddx52	Probable ATP-dependent RNA helicase DDX52	29576.9	49974.6	20370.8	45552.4	37360.9	21715.9	36489.4	58545.2	0.429296	0.158192	0.685859
sp|P29351|PTN6_MOUSE	P29351	PTN6_MOUSE	Ptpn6	Tyrosine-protein phosphatase non-receptor type 6	24421.6	63091	32973	58423.1	43774.1	21293.9	20480.3	38508.7	0.42754	0.490182	-0.141501
sp|Q8BG79|C19L2_MOUSE	Q8BG79	C19L2_MOUSE	Cwf19l2	CWF19-like protein 2	49772.1	41165.4	51848.3	28328.8	34400.7	33226.2	58541.4	47955.7	0.427277	0.245592	0.655145
sp|Q99KK2|NEUA_MOUSE	Q99KK2	NEUA_MOUSE	Cmas	N-acylneuraminate cytidylyltransferase	30483	46661.9	20072.8	42549	36728.7	20658.3	32791.5	64872.3	0.426844	0.12594	0.767099
sp|A2RSY6|TRM1L_MOUSE	A2RSY6	TRM1L_MOUSE	Trmt1l	TRMT1-like protein	21589.3	60435.4	23141.6	42332.9	41342.4	19685.3	25143.5	58632	0.426594	0.10147	0.457063
tr|F8VQJ3|F8VQJ3_MOUSE	F8VQJ3	F8VQJ3_MOUSE	Lamc1	Laminin subunit gamma-1	17997.4	62246.9	21313.3	48520.1	49433.7	10296.7	16688.1	47702	0.425933	0.225452	0.108373
tr|Q6P6L6|Q6P6L6_MOUSE	Q6P6L6	Q6P6L6_MOUSE	Gemin4	Gem (Nuclear organelle) associated protein 4	14326	41213.9	13962.6	33041.2	28112.8	13254.1	107505	73137	0.425046	0.184299	2.12658
sp|Q8VDP4|CCAR2_MOUSE	Q8VDP4	CCAR2_MOUSE	Ccar2	Cell cycle and apoptosis regulator protein 2	54653.5	41891.3	37160.8	37855.6	35632.5	36292.4	40689.8	47602.1	0.424706	0.0607135	0.295789
sp|Q9Z321|TOP3B_MOUSE	Q9Z321	TOP3B_MOUSE	Top3b	DNA topoisomerase 3-beta-1	30447.8	52438.7	28268.2	37723.2	34337.7	27435.7	42496.2	52484	0.424151	0.095294	0.620641
sp|P55200|KMT2A_MOUSE	P55200	KMT2A_MOUSE	Kmt2a	Histone-lysine N-methyltransferase 2A	48727.5	47883.9	35957.4	36167.2	31085.8	41021.9	36701.2	48634.2	0.42204	0.000337953	0.24299
sp|Q91YM4|TBRG4_MOUSE	Q91YM4	TBRG4_MOUSE	Tbrg4	Protein TBRG4	17281.4	63044.6	21056.2	69624	34508.7	25465.3	21218.5	40257	0.421528	0.596449	0.035673
sp|Q810V0|MPP10_MOUSE	Q810V0	MPP10_MOUSE	Mphosph10	U3 small nucleolar ribonucleoprotein protein MPP10	35299.4	47632.8	26311.4	49434.5	36628.3	25301.4	40300.8	51730.8	0.4213	0.290535	0.571497
sp|Q61765|K1H1_MOUSE	Q61765	K1H1_MOUSE	Krt31	Keratin, type I cuticular Ha1	12858.6	7361.38	706473	14103.7	5912.89	9191.65	5503.15	7036.73	0.420799	5.5761	-0.268459
sp|O88554|PARP2_MOUSE	O88554	PARP2_MOUSE	Parp2	Poly [ADP-ribose] polymerase 2	32003.6	46666.2	22481.3	43841.7	40378.8	18422.5	44326.5	54812	0.419963	0.173663	0.753599
sp|P60335|PCBP1_MOUSE	P60335	PCBP1_MOUSE	Pcbp1	Poly(rC)-binding protein 1	39032	46045.1	41997.3	38844.6	31271.5	32352.5	43151.3	49224.6	0.419199	0.345532	0.537946
sp|P47911|RL6_MOUSE	P47911	RL6_MOUSE	Rpl6	60S ribosomal protein L6	32782.6	44758.1	22467	44757.2	40247.4	17771.7	44612.5	54262.1	0.418424	0.21245	0.769071
sp|Q8VDQ9|KRI1_MOUSE	Q8VDQ9	KRI1_MOUSE	Kri1	Protein KRI1 homolog	33138.4	52586.5	42115.4	50785.5	28407.3	35747.6	46856.2	46584.7	0.418154	0.534131	0.542493
sp|Q8BHR2|ENOX1_MOUSE	Q8BHR2	ENOX1_MOUSE	Enox1	Ecto-NOX disulfide-thiol exchanger 1	16934.6	27033.2	23717.5	20856.4	17700.4	15223.9	97058.5	102098	0.417294	0.437044	2.59667
sp|Q9CY73|RM44_MOUSE	Q9CY73	RM44_MOUSE	Mrpl44	39S ribosomal protein L44, mitochondrial	34049	46407.7	83902.3	63590.5	30455.7	29847.2	18837.6	31906.5	0.415985	1.29034	-0.248988
sp|Q922M5|CDA7L_MOUSE	Q922M5	CDA7L_MOUSE	Cdca7l	Cell division cycle-associated 7-like protein	23966.7	54535.5	30368.3	48827.5	37755.6	21120.4	25681.7	54651.4	0.415052	0.427743	0.448312
sp|Q8BH15|CNO10_MOUSE	Q8BH15	CNO10_MOUSE	Cnot10	CCR4-NOT transcription complex subunit 10	12903.3	63887.4	32534.7	53820.6	42469.1	15136	26883.4	49096.2	0.414737	0.584088	0.399416
sp|Q8JZX4|SPF45_MOUSE	Q8JZX4	SPF45_MOUSE	Rbm17	Splicing factor 45	33625.7	34467.8	23939.2	28623.7	25363.1	25727.1	77173.8	77851.5	0.414468	0.0409958	1.60138
sp|Q9D0F1|NDC80_MOUSE	Q9D0F1	NDC80_MOUSE	Ndc80	Kinetochore protein NDC80 homolog	39969.3	53475	34472.5	48273	48029.6	22123.9	24893.6	39598	0.413591	0.238165	-0.121405
sp|Q6P4T2|U520_MOUSE	Q6P4T2	U520_MOUSE	Snrnp200	U5 small nuclear ribonucleoprotein 200 kDa helicase	35836.6	40241.7	30110.7	35027.7	29600.9	27549.1	53790.1	65430.7	0.412731	0.188754	1.06081
sp|Q9R0L6|PCM1_MOUSE	Q9R0L6	PCM1_MOUSE	Pcm1	Pericentriolar material 1 protein	14253.7	69883.9	20554.3	54169.1	50171.8	13032.6	17150.5	38457.2	0.412726	0.241535	-0.184741
sp|Q91X20|ASH2L_MOUSE	Q91X20	ASH2L_MOUSE	Ash2l	Set1/Ash2 histone methyltransferase complex subunit ASH2	29791.7	55428.1	28900.6	47582.6	33866.9	30213.5	34784.6	48673.3	0.411305	0.255259	0.381166
sp|Q6ZPZ3|ZC3H4_MOUSE	Q6ZPZ3	ZC3H4_MOUSE	Zc3h4	Zinc finger CCCH domain-containing protein 4	36699	26243.1	21427.8	18418.9	20599.4	26815.9	80135.5	91255.6	0.408673	-0.25089	1.85387
sp|Q9EPU4|CPSF1_MOUSE	Q9EPU4	CPSF1_MOUSE	Cpsf1	Cleavage and polyadenylation specificity factor subunit 1	35527.9	40802.2	35585.6	32349.1	32364.4	25179.6	50584.2	68530.3	0.407589	0.239486	1.04961
sp|Q99MU3|DSRAD_MOUSE	Q99MU3	DSRAD_MOUSE	Adar	Double-stranded RNA-specific adenosine deaminase	48678.7	43847.2	31072.4	39564.2	36099.4	33883.2	49560.7	48322.6	0.402861	0.0134192	0.484066
sp|Q7TPV4|MBB1A_MOUSE	Q7TPV4	MBB1A_MOUSE	Mybbp1a	Myb-binding protein 1A	23693.9	57659.6	23262.4	45862	40251.4	21342.7	29936	54206.3	0.401411	0.166401	0.450039
sp|Q9QXK7|CPSF3_MOUSE	Q9QXK7	CPSF3_MOUSE	Cpsf3	Cleavage and polyadenylation specificity factor subunit 3	34448.1	52325.3	33792.9	38962.2	36946.5	28793.5	36135.1	54091.6	0.40048	0.146274	0.456781
sp|Q9JJ80|RPF2_MOUSE	Q9JJ80	RPF2_MOUSE	Rpf2	Ribosome production factor 2 homolog	37893.7	44324	34868.8	45231	33646.5	28676.2	41130.3	55851.2	0.399691	0.362041	0.637953
sp|E9PZJ8|ASCC3_MOUSE	E9PZJ8	ASCC3_MOUSE	Ascc3	Activating signal cointegrator 1 complex subunit 3	23668.5	63236.6	25202.3	50961	43421.2	22511	22697.1	42219.7	0.398457	0.208114	-0.0223914
sp|Q99ME9|NOG1_MOUSE	Q99ME9	NOG1_MOUSE	Gtpbp4	Nucleolar GTP-binding protein 1	27326.6	47230	21178.9	40708.2	41829	14745.8	43412.3	62366.8	0.398175	0.129476	0.902822
sp|Q4VBE8|WDR18_MOUSE	Q4VBE8	WDR18_MOUSE	Wdr18	WD repeat-containing protein 18	44090.8	45424.2	30376.3	34078.3	39428.9	28501.7	36995.5	59995.4	0.398067	-0.075778	0.513787
sp|P62488|RPB7_MOUSE	P62488	RPB7_MOUSE	Polr2g	DNA-directed RNA polymerase II subunit RPB7	35830.4	42549.9	20711.9	43510.5	34991	24506.3	31287.4	67001.4	0.397668	0.110251	0.724204
sp|Q91WM1|STRBP_MOUSE	Q91WM1	STRBP_MOUSE	Strbp	Spermatid perinuclear RNA-binding protein	50212.6	38898.2	27235.9	33129.4	33563.1	34087.5	42445.5	55976.8	0.397498	-0.164383	0.540881
sp|Q8BU03|PWP2_MOUSE	Q8BU03	PWP2_MOUSE	Pwp2	Periodic tryptophan protein 2 homolog	24436.5	46765.5	20138.1	39192	31565.2	22541.9	43813	70058.3	0.396101	0.132949	1.07352
sp|Q8R480|NUP85_MOUSE	Q8R480	NUP85_MOUSE	Nup85	Nuclear pore complex protein Nup85	34269.8	47322.7	26121.3	47501.6	34374	27751.4	40683	53032.2	0.393255	0.244973	0.593101
sp|Q5NC05|TTF2_MOUSE	Q5NC05	TTF2_MOUSE	Ttf2	Transcription termination factor 2	20373.6	63940	10839.1	48784.8	50694.8	13562.2	23882.1	50321.2	0.391912	-0.107964	0.20763
sp|Q8BPM2|M4K5_MOUSE	Q8BPM2	M4K5_MOUSE	Map4k5	Mitogen-activated protein kinase kinase kinase kinase 5	27451.4	61240.7	21748.7	57298.9	43088.6	24510.8	20848.9	42826	0.391795	0.225711	-0.0862863
sp|Q9CXF7|CHD1L_MOUSE	Q9CXF7	CHD1L_MOUSE	Chd1l	Chromodomain-helicase-DNA-binding protein 1-like	28271.6	58187.2	27939.6	53370.4	40506.3	25396.1	23248.5	48243.7	0.391683	0.303104	0.117456
sp|P43247|MSH2_MOUSE	P43247	MSH2_MOUSE	Msh2	DNA mismatch repair protein Msh2	18395.2	63845.5	21221.6	51846.1	42132	20581.3	19056.8	51008.9	0.391081	0.220461	0.159937
sp|P14733|LMNB1_MOUSE	P14733	LMNB1_MOUSE	Lmnb1	Lamin-B1	39294.2	49504.1	37650.5	43766.6	32059.9	35710.1	43619.7	45422.3	0.389884	0.264683	0.393838
sp|Q6A009|LTN1_MOUSE	Q6A009	LTN1_MOUSE	Ltn1	E3 ubiquitin-protein ligase listerin	23683.7	62184.3	40056.9	49611.9	41136.5	24459.4	13015.2	45194.4	0.388512	0.450999	-0.17235
sp|Q61646|HPT_MOUSE	Q61646	HPT_MOUSE	Hp	Haptoglobin	110635	23997	108814	30886.6	26731.9	76372.1	50065	17479.2	0.384918	0.438234	-0.610198
sp|Q9QYI3|DNJC7_MOUSE	Q9QYI3	DNJC7_MOUSE	Dnajc7	DnaJ homolog subfamily C member 7	22594.2	59472.7	17899.3	57723.5	46825.2	16026	19412.1	47636.5	0.38486	0.266879	0.0932654
sp|Q61001|LAMA5_MOUSE	Q61001	LAMA5_MOUSE	Lama5	Laminin subunit alpha-5	12660.9	69193.3	17547.2	49371.9	48256.3	14442	18503.6	40436.4	0.384627	0.0939897	-0.0891815
sp|Q8BWW4|LARP4_MOUSE	Q8BWW4	LARP4_MOUSE	Larp4	La-related protein 4	23182.7	58999.1	27635.8	53082.4	40072.2	22898.4	24041.4	45872.2	0.384142	0.358217	0.150896
sp|P11103|PARP1_MOUSE	P11103	PARP1_MOUSE	Parp1	Poly [ADP-ribose] polymerase 1	32457.6	48745.9	25627.7	45600.6	39932.9	22389.5	36395.2	54571	0.381788	0.192699	0.545578
tr|B1B0C7|B1B0C7_MOUSE	B1B0C7	B1B0C7_MOUSE	Hspg2	Basement membrane-specific heparan sulfate proteoglycan core protein	21597.8	64625.7	26523.8	41628.3	41607.8	24603.9	34419	39779.8	0.380996	0.0416733	0.164312
tr|A2AWT5|A2AWT5_MOUSE	A2AWT5	A2AWT5_MOUSE	Ubtf	Nucleolar transcription factor 1	53267	48622.9	45746.9	35610.7	32714.1	45596.4	47191	45749	0.379734	0.0550713	0.247094
sp|Q9D4H8|CUL2_MOUSE	Q9D4H8	CUL2_MOUSE	Cul2	Cullin-2	23685.2	55244.5	26148.7	43612.5	36985.7	23684.4	25591.2	61885.4	0.379581	0.201438	0.527911
sp|P49718|MCM5_MOUSE	P49718	MCM5_MOUSE	Mcm5	DNA replication licensing factor MCM5	23125.8	60625.4	31072.3	47779.1	42351.4	22047.1	23048.1	48212.6	0.379084	0.292108	0.14608
sp|Q9EQ61|PESC_MOUSE	Q9EQ61	PESC_MOUSE	Pes1	Pescadillo homolog	17613.7	60441.6	15874.9	48350.2	45731.7	14308.3	25491.4	55851.8	0.378572	0.0972122	0.438096
sp|Q8BK67|RCC2_MOUSE	Q8BK67	RCC2_MOUSE	Rcc2	Protein RCC2	25414.4	53357.3	18780.4	42143.2	46648.2	13971.1	30377.2	55247.6	0.377901	0.00722396	0.498253
sp|P00375|DYR_MOUSE	P00375	DYR_MOUSE	Dhfr	Dihydrofolate reductase	16351.5	72546.7	13870.3	57916.9	47202.6	21336.3	20878.3	39641.2	0.375232	0.0668039	-0.179523
sp|Q91VR5|DDX1_MOUSE	Q91VR5	DDX1_MOUSE	Ddx1	ATP-dependent RNA helicase DDX1	28745	53477.9	27212.7	49167	43204	20193.7	30561.3	46278.2	0.375111	0.268761	0.27742
sp|Q6DFW4|NOP58_MOUSE	Q6DFW4	NOP58_MOUSE	Nop58	Nucleolar protein 58	31530.3	48453.8	27225.9	45522.8	35505.1	26184.6	45539.2	55426.7	0.374684	0.237893	0.710767
sp|P97930|KTHY_MOUSE	P97930	KTHY_MOUSE	Dtymk	Thymidylate kinase	20500.3	66036.6	21475.9	54887.5	45074.6	21670.5	18992.6	47207.5	0.374655	0.19422	-0.0118288
sp|Q8BHB4|WDR3_MOUSE	Q8BHB4	WDR3_MOUSE	Wdr3	WD repeat-containing protein 3	36401.3	44518.7	30962.6	38266.3	34705.6	27717.6	43153.6	55962.3	0.374416	0.149293	0.667035
sp|P17809|GTR1_MOUSE	P17809	GTR1_MOUSE	Slc2a1	Solute carrier family 2, facilitated glucose transporter member 1	34254.8	57162.1	51378.6	44767.9	21628.9	48911.8	41351	37303	0.374006	0.446779	0.157066
sp|Q91W39|NCOA5_MOUSE	Q91W39	NCOA5_MOUSE	Ncoa5	Nuclear receptor coactivator 5	40713.3	36533.3	26538.6	32320.8	38260	21401.1	47009.4	72832.9	0.372682	-0.0195181	1.00628
sp|Q80UU2|RPP38_MOUSE	Q80UU2	RPP38_MOUSE	Rpp38	Ribonuclease P protein subunit p38	22836.1	51483.8	24592	41055	34824.9	22598.5	33560.8	72022.8	0.372112	0.193093	0.878678
sp|Q61846|MELK_MOUSE	Q61846	MELK_MOUSE	Melk	Maternal embryonic leucine zipper kinase	41488.1	40699.9	63173.7	36066.8	36257.6	27531.9	38333.2	39334.6	0.365609	0.637612	0.283999
sp|P61750|ARF4_MOUSE	P61750	ARF4_MOUSE	Arf4	ADP-ribosylation factor 4	11165.3	65776.2	13941	54302.7	46429.8	13297.6	11714.1	54649.6	0.36537	0.192304	0.152
sp|P13864|DNMT1_MOUSE	P13864	DNMT1_MOUSE	Dnmt1	DNA (cytosine-5)-methyltransferase 1	17682.2	60402.4	21393.4	44405.8	38743.2	21937.9	24152.6	55161.3	0.363793	0.116824	0.38633
sp|P58742|AAAS_MOUSE	P58742	AAAS_MOUSE	Aaas	Aladin	21839.1	55062.2	33033	46356.8	34152.8	25634.7	31509.8	59515	0.363166	0.40911	0.606415
sp|Q8CD15|MINA_MOUSE	Q8CD15	MINA_MOUSE	Mina	Bifunctional lysine-specific demethylase and histidyl-hydroxylase MINA	23793.8	49076.1	15638.5	41534.2	40494.7	16175	27164.7	73667.5	0.362745	0.0127483	0.831306
tr|Q9D4G5|Q9D4G5_MOUSE	Q9D4G5	Q9D4G5_MOUSE	Pop1	Blood vessel epicardial substance	28505.3	53201	26033.3	34763	36272.6	27287	37888	57391.5	0.362338	-0.0641268	0.584058
sp|Q61545|EWS_MOUSE	Q61545	EWS_MOUSE	Ewsr1	RNA-binding protein EWS	41354.8	27328.6	30223.9	23631.9	25386.5	28142.5	110622	69937.1	0.35964	0.00877783	1.75407
sp|Q80Y44|DDX10_MOUSE	Q80Y44	DDX10_MOUSE	Ddx10	Probable ATP-dependent RNA helicase DDX10	24722.2	50063.6	26701.2	45444.7	38042.6	20285.1	35904	58206.8	0.358585	0.306737	0.69018
sp|Q8K4L0|DDX54_MOUSE	Q8K4L0	DDX54_MOUSE	Ddx54	ATP-dependent RNA helicase DDX54	23974.5	49899.9	20008.4	41247.6	40379	17242.2	35620.2	62781.1	0.358473	0.0882495	0.772077
sp|P63154|CRNL1_MOUSE	P63154	CRNL1_MOUSE	Crnkl1	Crooked neck-like protein 1	28890.6	53898.9	28739.4	46058.2	35683.5	28961.7	33595.4	52059.6	0.356907	0.210451	0.405995
sp|P86048|RL10L_MOUSE	P86048	RL10L_MOUSE	Rpl10l	60S ribosomal protein L10-like	42138.6	48035.2	39851.7	48283.1	38681.3	31850.9	36770.1	45349.1	0.354427	0.321429	0.219437
sp|P27641|XRCC5_MOUSE	P27641	XRCC5_MOUSE	Xrcc5	X-ray repair cross-complementing protein 5	28392	61824.3	28275.9	55719.8	42529.1	28085.3	26858.5	40227	0.353427	0.250353	-0.0739586
sp|Q14AX6|CDK12_MOUSE	Q14AX6	CDK12_MOUSE	Cdk12	Cyclin-dependent kinase 12	29262.7	40301.4	25292.3	35008.6	32685.6	21775.9	67101.2	67952.7	0.353108	0.146945	1.31023
sp|O88532|ZFR_MOUSE	O88532	ZFR_MOUSE	Zfr	Zinc finger RNA-binding protein	53180.8	36031.1	68681.3	23542.5	30543	39384.5	52883.3	48614.7	0.351376	0.39928	0.53752
sp|A2A432|CUL4B_MOUSE	A2A432	CUL4B_MOUSE	Cul4b	Cullin-4B	27957	51205.7	20373	44960.4	43548.5	18514.9	31493.9	58015	0.351078	0.0740784	0.528288
sp|Q8BWU5|OSGEP_MOUSE	Q8BWU5	OSGEP_MOUSE	Osgep	Probable tRNA N6-adenosine threonylcarbamoyltransferase	39094.6	52915.2	46322	57708.5	45710.7	26457.5	20759.3	34743.9	0.350425	0.527572	-0.378792
sp|Q8VBU8|BANP_MOUSE	Q8VBU8	BANP_MOUSE	Banp	Protein BANP	27477.9	58982.7	22883.3	46676.7	41867.7	25976.6	32926.4	51307.1	0.349815	0.0360279	0.312165
sp|Q00547|HMMR_MOUSE	Q00547	HMMR_MOUSE	Hmmr	Hyaluronan mediated motility receptor	16772.2	64611.7	9351.52	57283.1	49658.8	14218.6	23463	46637.2	0.349437	0.0609669	0.134112
sp|Q8BWY9|CIP2A_MOUSE	Q8BWY9	CIP2A_MOUSE	Kiaa1524	Protein CIP2A	14901.7	71353.4	21565.7	56186.7	50736	17006.1	15726.2	33528.8	0.348557	0.198834	-0.459781
sp|Q8BGA5|KRR1_MOUSE	Q8BGA5	KRR1_MOUSE	Krr1	KRR1 small subunit processome component homolog	40984.1	54606.5	35162.4	53915	32608.9	42490.7	39266.4	34524.7	0.348064	0.246255	-0.0253579
tr|F8VQ29|F8VQ29_MOUSE	F8VQ29	F8VQ29_MOUSE	Iqgap3	Protein Iqgap3	8772.15	73571.3	13680.3	52525.6	61660.5	3047.83	9078.41	40265.9	0.347703	0.0330092	-0.391068
sp|Q9QXE7|TBL1X_MOUSE	Q9QXE7	TBL1X_MOUSE	Tbl1x	F-box-like/WD repeat-containing protein TBL1X	27693	49195.3	29609.1	52090.9	28440.4	31997.2	44180	43422.5	0.347319	0.43489	0.535526
sp|Q9ESV0|DDX24_MOUSE	Q9ESV0	DDX24_MOUSE	Ddx24	ATP-dependent RNA helicase DDX24	29533.6	49776.7	27056.9	43812.1	41287.2	21060.7	37358.1	55323.6	0.347169	0.184816	0.571945
sp|Q6P4S8|INT1_MOUSE	Q6P4S8	INT1_MOUSE	Ints1	Integrator complex subunit 1	23795.5	53789.3	24068.8	45156.8	40119.3	20872.3	30492.5	57096.5	0.347163	0.182694	0.522138
sp|O35130|NEP1_MOUSE	O35130	NEP1_MOUSE	Emg1	Ribosomal RNA small subunit methyltransferase NEP1	25853.9	52511.8	14808.4	43952.8	41721.8	19889.7	35742.9	60997.3	0.347021	-0.0683391	0.650915
sp|Q9Z1T1|AP3B1_MOUSE	Q9Z1T1	AP3B1_MOUSE	Ap3b1	AP-3 complex subunit beta-1	22165.1	64158.9	23959.3	56225.3	41634.6	26257.2	20778.5	39597.9	0.346524	0.240088	-0.169253
tr|A2AT37|A2AT37_MOUSE	A2AT37	A2AT37_MOUSE	Upf2	Protein Upf2	58896.5	35663.6	62969	40681.8	41430.2	33060.6	48944.8	42107.2	0.344171	0.476598	0.28963
sp|Q05CL8|LARP7_MOUSE	Q05CL8	LARP7_MOUSE	Larp7	La-related protein 7	28715.9	54812.9	25386.4	43780.1	40057.8	25755.4	36853.7	54546.9	0.343899	0.0716995	0.473828
sp|Q8CHC8|ADNP2_MOUSE	Q8CHC8	ADNP2_MOUSE	Adnp2	ADNP homeobox protein 2	23874.4	51518.6	29354.6	46528.5	40923.8	18501.7	32420.2	57088.5	0.34335	0.352698	0.590946
sp|Q9ERS5|PKHA2_MOUSE	Q9ERS5	PKHA2_MOUSE	Plekha2	Pleckstrin homology domain-containing family A member 2	22365.2	63274.9	14357	51687.2	52810.8	14724	16288.7	45593.6	0.342655	-0.032199	-0.126103
sp|Q9DCE5|PK1IP_MOUSE	Q9DCE5	PK1IP_MOUSE	Pak1ip1	p21-activated protein kinase-interacting protein 1	28854.1	47458.8	19861.1	37582	37581.2	22622.9	40296	63917.5	0.342065	-0.0677307	0.791609
sp|Q5RJG1|NOL10_MOUSE	Q5RJG1	NOL10_MOUSE	Nol10	Nucleolar protein 10	42503.1	44115.6	38559.2	34184.7	33374.7	34972.7	54740.7	51682.2	0.341795	0.089941	0.638852
sp|Q6P9R1|DDX51_MOUSE	Q6P9R1	DDX51_MOUSE	Ddx51	ATP-dependent RNA helicase DDX51	28459.1	49351.1	24644.3	43292.1	44372.6	17024.3	31375.6	59886.9	0.341792	0.146017	0.571856
sp|Q8CH02|SUGP1_MOUSE	Q8CH02	SUGP1_MOUSE	Sugp1	SURP and G-patch domain-containing protein 1	21615.3	21533.9	2435.65	26006.8	23030.4	11143.6	86693.6	109431	0.336431	-0.264853	2.5208
sp|Q8K284|TF3C1_MOUSE	Q8K284	TF3C1_MOUSE	Gtf3c1	General transcription factor 3C polypeptide 1	31611.3	58101.8	30683.2	33074.8	44786.6	26323.9	29073.4	55339.9	0.335257	-0.157456	0.247408
sp|Q6PFD9|NUP98_MOUSE	Q6PFD9	NUP98_MOUSE	Nup98	Nuclear pore complex protein Nup98-Nup96	25414.2	52603.7	22417	45885.2	43821.4	18121.5	32294.3	56220.1	0.332867	0.140993	0.514974
sp|Q61164|CTCF_MOUSE	Q61164	CTCF_MOUSE	Ctcf	Transcriptional repressor CTCF	34902.8	54857.8	82782.7	18968.6	12282	59012.1	63261.3	29021.3	0.332301	0.513194	0.372278
sp|Q3UHX0|NOL8_MOUSE	Q3UHX0	NOL8_MOUSE	Nol8	Nucleolar protein 8	32684.7	38297.4	21538.1	36863.8	32893.1	23493.7	53210.2	70893	0.332096	0.0506581	1.13811
sp|A2AR02|PPIG_MOUSE	A2AR02	PPIG_MOUSE	Ppig	Peptidyl-prolyl cis-trans isomerase G	41931.7	39886.7	48936.1	27209.6	24879.8	40252.7	61938.4	66001	0.329047	0.225387	0.974011
sp|Q8BH74|NU107_MOUSE	Q8BH74	NU107_MOUSE	Nup107	Nuclear pore complex protein Nup107	28213	56263.4	21199.7	47842.3	44210.4	23038.7	25212.3	48733.9	0.329035	0.0379582	0.136962
sp|Q9CWH0|DPPA2_MOUSE	Q9CWH0	DPPA2_MOUSE	Dppa2	Developmental pluripotency-associated protein 2	43050	53066.1	26464.7	45413.9	45943.8	30574.8	31915.6	46883.9	0.328966	-0.0902484	0.0423753
sp|Q9CW03|SMC3_MOUSE	Q9CW03	SMC3_MOUSE	Smc3	Structural maintenance of chromosomes protein 3	43483.8	48911.4	35403.5	45820.9	38948.4	34707.5	36099.8	47340.8	0.327018	0.141113	0.179949
sp|P97310|MCM2_MOUSE	P97310	MCM2_MOUSE	Mcm2	DNA replication licensing factor MCM2	15688.9	62669.1	18178.4	54274.9	44916.5	17555	19484.8	52534.3	0.326884	0.213853	0.205182
sp|Q8BVU5|NUDT9_MOUSE	Q8BVU5	NUDT9_MOUSE	Nudt9	ADP-ribose pyrophosphatase, mitochondrial	16694.1	61385.9	40507.3	58695.2	39337.5	22962.3	20043	41580.1	0.325728	0.671151	-0.0157568
sp|Q3UPF5|ZCCHV_MOUSE	Q3UPF5	ZCCHV_MOUSE	Zc3hav1	Zinc finger CCCH-type antiviral protein 1	29003.4	51048.7	33114.6	33815.9	38062.2	25839.3	48168.8	49712.1	0.32509	0.0668149	0.615179
sp|Q922D8|C1TC_MOUSE	Q922D8	C1TC_MOUSE	Mthfd1	C-1-tetrahydrofolate synthase, cytoplasmic	19922.9	66448.6	24320.6	61602.2	45977.2	23067	18177.8	34031	0.323037	0.315522	-0.403225
sp|Q8CCF0|PRP31_MOUSE	Q8CCF0	PRP31_MOUSE	Prpf31	U4/U6 small nuclear ribonucleoprotein Prp31	16166.2	56748.4	28395.2	49555.5	39738.1	18554.7	23272.9	52597.3	0.322889	0.419247	0.380217
sp|P59110|SENP1_MOUSE	P59110	SENP1_MOUSE	Senp1	Sentrin-specific protease 1	33925.5	47586.9	34255.6	44267.9	36946.9	28245.4	32457.5	54342.3	0.322318	0.268422	0.41299
sp|Q62073|M3K7_MOUSE	Q62073	M3K7_MOUSE	Map3k7	Mitogen-activated protein kinase kinase kinase 7	31846.4	58173.5	26851.7	44497.5	31379.4	40629	55590.7	38244.6	0.322078	-0.0132678	0.381966
sp|O70194|EIF3D_MOUSE	O70194	EIF3D_MOUSE	Eif3d	Eukaryotic translation initiation factor 3 subunit D	25457.1	56523.4	24904.6	48636.3	38497.4	27173.4	33213.2	47773.4	0.32003	0.163296	0.302432
sp|Q9WUU9|GANP_MOUSE	Q9WUU9	GANP_MOUSE	Mcm3ap	Germinal-center associated nuclear protein	23613	61645.1	20469.2	36564.7	46609.6	21827.1	31461	53382.8	0.317069	-0.26295	0.31004
sp|Q8BFV2|PCID2_MOUSE	Q8BFV2	PCID2_MOUSE	Pcid2	PCI domain-containing protein 2	52931	38671	36756.1	32228.2	27706.3	45863.6	48005.6	58519.8	0.316263	-0.0928472	0.534009
sp|Q9D0R4|DDX56_MOUSE	Q9D0R4	DDX56_MOUSE	Ddx56	Probable ATP-dependent RNA helicase DDX56	31238.2	49901.2	24365.2	47595.2	44966.5	20280	35747.9	52337	0.314502	0.141301	0.432994
sp|A6PWY4|WDR76_MOUSE	A6PWY4	WDR76_MOUSE	Wdr76	WD repeat-containing protein 76	41027.9	42788.3	35849.5	40044.2	38374.9	29061.6	37161.1	57145.4	0.3137	0.170451	0.483829
tr|E9Q7L1|E9Q7L1_MOUSE	E9Q7L1	E9Q7L1_MOUSE	Urb2	Protein Urb2	26364.7	47324.3	20858.1	42772.2	37527.2	21777.9	33539.5	64531.9	0.313294	0.101559	0.725677
sp|Q9CYH6|RRS1_MOUSE	Q9CYH6	RRS1_MOUSE	Rrs1	Ribosome biogenesis regulatory protein homolog	26064.8	48059.1	14816.3	39608.3	39467.9	20195.6	34006.9	66516	0.313091	-0.132587	0.752604
sp|Q8BTI8|SRRM2_MOUSE	Q8BTI8	SRRM2_MOUSE	Srrm2	Serine/arginine repetitive matrix protein 2	37578.8	29431.6	35826	22291.5	23263.5	30751.5	83672.2	74032.4	0.311026	0.105614	1.54579
sp|P41105|RL28_MOUSE	P41105	RL28_MOUSE	Rpl28	60S ribosomal protein L28	42945.3	49221.5	38766.5	43906.2	39812.1	34496.4	43507.3	40217.8	0.310721	0.153883	0.172133
sp|P11087|CO1A1_MOUSE	P11087	CO1A1_MOUSE	Col1a1	Collagen alpha-1(I) chain	93220.2	19295.7	93948.7	22839.3	22117.2	68652.4	50100.3	28018	0.309846	0.363611	-0.21655
sp|O70494|SP3_MOUSE	O70494	SP3_MOUSE	Sp3	Transcription factor Sp3	19597.5	56609	20992.7	46643	44887.8	16605.6	22358.6	58845.8	0.309482	0.137352	0.401124
sp|Q8K224|NAT10_MOUSE	Q8K224	NAT10_MOUSE	Nat10	N-acetyltransferase 10	26359.4	48837.9	20639.6	45835.4	41390	19303.9	32702.4	60127.7	0.309131	0.131262	0.613043
sp|Q6NV83|SR140_MOUSE	Q6NV83	SR140_MOUSE	U2surp	U2 snRNP-associated SURP motif-containing protein	35146.6	32035.7	29976.9	25698.7	25629.8	28598.3	69666.1	82872.9	0.309041	0.0380046	1.49207
sp|Q8CI11|GNL3_MOUSE	Q8CI11	GNL3_MOUSE	Gnl3	Guanine nucleotide-binding protein-like 3	27801.8	49477.7	20925.4	49581.1	43956.6	18490.5	35178.4	50950.3	0.307452	0.175122	0.46386
sp|Q8BU04|UBR7_MOUSE	Q8BU04	UBR7_MOUSE	Ubr7	Putative E3 ubiquitin-protein ligase UBR7	10965.9	66353.9	15709.3	53165.5	48937.3	13572.4	27619.8	44951.1	0.306758	0.139898	0.215312
sp|Q8BLN5|ERG7_MOUSE	Q8BLN5	ERG7_MOUSE	Lss	Lanosterol synthase	12205.4	70797.1	20004.2	59761	50671.6	16610.7	11056.3	41267.1	0.302928	0.245534	-0.36277
sp|Q3U9G9|LBR_MOUSE	Q3U9G9	LBR_MOUSE	Lbr	Lamin-B receptor	33705.8	52248.9	36324	42295.7	38140.2	31540.7	30779.9	49223.5	0.302813	0.174128	0.199298
sp|Q9Z2Z9|GFPT2_MOUSE	Q9Z2Z9	GFPT2_MOUSE	Gfpt2	Glutamine--fructose-6-phosphate aminotransferase [isomerizing] 2	14817.9	67879.9	18713.4	59504.8	49515.4	17538.3	13572.8	43168	0.302531	0.222188	-0.24093
sp|Q62432|SMAD2_MOUSE	Q62432	SMAD2_MOUSE	Smad2	Mothers against decapentaplegic homolog 2	37273	61705	27939.5	48292.9	49644.3	30669.6	25141.7	42907.3	0.301457	-0.0752462	-0.239078
sp|Q61881|MCM7_MOUSE	Q61881	MCM7_MOUSE	Mcm7	DNA replication licensing factor MCM7	25429.4	64114.6	21138.9	50188.2	47704.9	25035.1	21070.6	45436.8	0.299848	-0.0282995	-0.129233
sp|Q3U0V1|FUBP2_MOUSE	Q3U0V1	FUBP2_MOUSE	Khsrp	Far upstream element-binding protein 2	30215.5	15538.9	79239.6	11067.6	15737.8	21469.6	115627	81164.3	0.298319	1.27925	2.40301
sp|P31266|SUH_MOUSE	P31266	SUH_MOUSE	Rbpj	Recombining binding protein suppressor of hairless	27421	45734.3	21078.1	36494	40424.6	19067.7	42941	65900.7	0.298257	-0.0473345	0.871455
sp|Q9WV70|NOC2L_MOUSE	Q9WV70	NOC2L_MOUSE	Noc2l	Nucleolar complex protein 2 homolog	25155.1	51122.4	24913.9	46877.4	39374.1	22740.6	44023.4	53298.6	0.296323	0.208875	0.647831
sp|Q7TN89|RASE_MOUSE	Q7TN89	RASE_MOUSE	Eras	GTPase ERas	13818.4	64718.4	15061.7	52724.5	49752.1	14294.8	11986.7	53782.2	0.29424	0.0818639	0.0382756
sp|Q9CQN7|RM41_MOUSE	Q9CQN7	RM41_MOUSE	Mrpl41	39S ribosomal protein L41, mitochondrial	43004.9	45505.9	119640	52775.4	18387	53807.6	34473.8	20389.5	0.293962	1.25592	-0.39605
sp|Q922J9|FACR1_MOUSE	Q922J9	FACR1_MOUSE	Far1	Fatty acyl-CoA reductase 1	28720.5	57000.5	28646.2	56830.8	50796.3	19163.6	19549.1	39924	0.29312	0.289008	-0.234292
sp|P62245|RS15A_MOUSE	P62245	RS15A_MOUSE	Rps15a	40S ribosomal protein S15a	51562.1	41656.2	60770.7	43514.2	37065	39014.2	48834.4	41685.7	0.293113	0.454957	0.250739
sp|O08582|GTPB1_MOUSE	O08582	GTPB1_MOUSE	Gtpbp1	GTP-binding protein 1	10849.7	68294.4	18175.3	53333.5	41034.3	23563	25798.2	48967.3	0.293007	0.146647	0.2109
sp|Q9D4J7|PHF6_MOUSE	Q9D4J7	PHF6_MOUSE	Phf6	PHD finger protein 6	22337.5	57547.3	22205	46752.6	42878.6	22382.5	30489.1	52699.8	0.291699	0.0794876	0.350169
sp|Q9JK91|MLH1_MOUSE	Q9JK91	MLH1_MOUSE	Mlh1	DNA mismatch repair protein Mlh1	25159.3	60084.5	21220.2	48360.6	43048.1	26661.7	16524.9	57377.5	0.290234	-0.00267188	0.0842599
sp|Q8K3Z9|PO121_MOUSE	Q8K3Z9	PO121_MOUSE	Pom121	Nuclear envelope pore membrane protein POM 121	30249.8	44768.5	13715.4	44833.9	44700.2	16654.6	38652.7	62697.5	0.290065	-0.0675271	0.724099
sp|Q91VI7|RINI_MOUSE	Q91VI7	RINI_MOUSE	Rnh1	Ribonuclease inhibitor	11802.9	66752	11414	58109.7	46820.3	17436.1	14225.5	50272.2	0.289862	0.113662	0.00540872
sp|P97311|MCM6_MOUSE	P97311	MCM6_MOUSE	Mcm6	DNA replication licensing factor MCM6	17431.8	63349.7	13149.6	56175.6	47510.6	18589.9	14924.1	52851.6	0.289364	0.0687195	0.0361092
sp|F6ZDS4|TPR_MOUSE	F6ZDS4	TPR_MOUSE	Tpr	Nucleoprotein TPR	48740	43823	42897.3	36912.5	36025.8	39726.7	54081.6	44930.4	0.289141	0.0752721	0.38631
sp|Q5SFM8|RBM27_MOUSE	Q5SFM8	RBM27_MOUSE	Rbm27	RNA-binding protein 27	33524.2	39893.9	25180.6	34768.9	31271.3	28815.4	57310.9	66916	0.289088	-0.00329966	1.04786
sp|Q6PCN7|HLTF_MOUSE	Q6PCN7	HLTF_MOUSE	Hltf	Helicase-like transcription factor	27837.4	57370.9	24949.7	42253.8	39266.1	30471.1	35511.1	52257.3	0.289065	-0.0533928	0.331774
sp|O89086|RBM3_MOUSE	O89086	RBM3_MOUSE	Rbm3	Putative RNA-binding protein 3	59298.6	38321.1	50475.6	19950.7	37222.7	42689.1	60922.1	44013.4	0.288763	-0.182295	0.393022
sp|Q9CPN8|IF2B3_MOUSE	Q9CPN8	IF2B3_MOUSE	Igf2bp3	Insulin-like growth factor 2 mRNA-binding protein 3	28910.9	57799.9	19603.3	50345	48261.9	22751.9	25113.6	44473	0.288113	-0.0218093	-0.0292879
sp|P62141|PP1B_MOUSE	P62141	PP1B_MOUSE	Ppp1cb	Serine/threonine-protein phosphatase PP1-beta catalytic subunit	37308.3	49314.8	42954.1	51722	31095.6	39879.7	34762.6	42059.3	0.287435	0.415682	0.1142
tr|D3Z0M9|D3Z0M9_MOUSE	D3Z0M9	D3Z0M9_MOUSE	Ddx23	MCG18410, isoform CRA_a	43381.3	34915	30185.7	29597	29760.9	34424.6	67427.6	68481.7	0.286696	-0.102519	1.08233
sp|P97377|CDK2_MOUSE	P97377	CDK2_MOUSE	Cdk2	Cyclin-dependent kinase 2	26965	58716.6	28392.2	50887.7	37931.8	32328	26766.4	45420.2	0.286286	0.174255	0.03903
sp|Q8C156|CND2_MOUSE	Q8C156	CND2_MOUSE	Ncaph	Condensin complex subunit 2	40254.2	53385.6	19719.9	57660.2	47792.2	29011.2	22981.4	39379.4	0.285952	0.0107925	-0.300531
sp|P30681|HMGB2_MOUSE	P30681	HMGB2_MOUSE	Hmgb2	High mobility group protein B2	69896.2	33455.3	96325	41175.6	28199.3	56661.5	43447.2	34805	0.284389	0.696268	-0.116966
sp|Q99LH1|NOG2_MOUSE	Q99LH1	NOG2_MOUSE	Gnl2	Nucleolar GTP-binding protein 2	30411.3	49842.1	26038.6	44525.9	41441.8	24471.5	39535.2	50719.7	0.283993	0.0983734	0.453435
sp|Q8R323|RFC3_MOUSE	Q8R323	RFC3_MOUSE	Rfc3	Replication factor C subunit 3	30818.1	56689.8	32797.1	47242.7	43652.9	28221.4	25087.1	46049.6	0.283936	0.155243	-0.0148816
sp|Q91VJ4|STK38_MOUSE	Q91VJ4	STK38_MOUSE	Stk38	Serine/threonine-protein kinase 38	29905.4	59297.4	26600.6	55325.7	48635.4	24666.2	17702	43878.7	0.283246	0.160482	-0.251366
sp|O88477|IF2B1_MOUSE	O88477	IF2B1_MOUSE	Igf2bp1	Insulin-like growth factor 2 mRNA-binding protein 1	35462.4	50324.1	22761.4	48664.2	46283.4	24216.6	30169.6	44070	0.283126	0.0188147	0.0745637
sp|Q9CX34|SUGT1_MOUSE	Q9CX34	SUGT1_MOUSE	Sugt1	Suppressor of G2 allele of SKP1 homolog	19214.6	60054.5	16878.1	55074.1	48719.6	16454.3	22453.4	46216.2	0.282464	0.142743	0.0753762
sp|Q9EPE9|AT131_MOUSE	Q9EPE9	AT131_MOUSE	Atp13a1	Manganese-transporting ATPase 13A1	24478.5	60748.3	29269.3	43849.3	46030.8	24042.7	19696.3	44907.3	0.282439	0.0613699	-0.117255
sp|Q91XC0|AJUBA_MOUSE	Q91XC0	AJUBA_MOUSE	Ajuba	LIM domain-containing protein ajuba	29862.9	66532.3	49598.9	47711.8	24708.2	54566.5	26743.3	28286.9	0.282099	0.295736	-0.526637
sp|P56959|FUS_MOUSE	P56959	FUS_MOUSE	Fus	RNA-binding protein FUS	19129	9303.77	204936	19588.5	8963.55	14429.1	98399.2	81323.1	0.2815	3.26275	2.94164
sp|P14602|HSPB1_MOUSE	P14602	HSPB1_MOUSE	Hspb1	Heat shock protein beta-1	11680.9	63932.3	28862.3	56627.2	52562.5	9652	12391.4	50024.3	0.281387	0.458496	0.00465706
sp|Q9D7H3|RTCA_MOUSE	Q9D7H3	RTCA_MOUSE	RtcA	RNA 3'-terminal phosphate cyclase	24699.1	62696	28922.8	50675.1	52793.8	19138.9	23228	37787.6	0.280906	0.146083	-0.237469
sp|P13439|UMPS_MOUSE	P13439	UMPS_MOUSE	Umps	Uridine 5'-monophosphate synthase	10392.5	68104.2	19628.6	61389.8	49684.4	14984.2	11291.8	43112.6	0.279567	0.325184	-0.24934
sp|Q8VEJ4|NLE1_MOUSE	Q8VEJ4	NLE1_MOUSE	Nle1	Notchless protein homolog 1	45413.3	42030.4	52644.6	31149.8	32890.4	39202.7	46320.2	52446.1	0.278494	0.216992	0.454157
sp|Q62167|DDX3X_MOUSE	Q62167	DDX3X_MOUSE	Ddx3x	ATP-dependent RNA helicase DDX3X	23029.5	65403	17014.3	36885.9	45788.1	27126.3	23847.5	45376	0.278371	-0.435915	-0.0749422
sp|Q62172|RBP1_MOUSE	Q62172	RBP1_MOUSE	Ralbp1	RalA-binding protein 1	90975.5	24416.6	154006	15314.3	25898.9	69435.5	53509.7	14569.2	0.275477	0.828685	-0.485788
sp|P70399|TP53B_MOUSE	P70399	TP53B_MOUSE	Tp53bp1	Tumor suppressor p53-binding protein 1	27230.3	65579.8	24704.5	48622.2	26941.4	49773.3	50505.7	36194.1	0.274776	-0.0651663	0.176523
sp|Q60972|RBBP4_MOUSE	Q60972	RBBP4_MOUSE	Rbbp4	Histone-binding protein RBBP4	49233.5	38369.5	38405.1	42076.4	41562.3	30875.5	35102.6	47588.6	0.274236	0.151912	0.19099
sp|Q8BKG3|PTK7_MOUSE	Q8BKG3	PTK7_MOUSE	Ptk7	Inactive tyrosine-protein kinase 7	38714.3	54522.6	49238	30435.3	44171.1	32936.8	39221	42307.5	0.274022	0.0472181	0.0804261
sp|Q8VDF2|UHRF1_MOUSE	Q8VDF2	UHRF1_MOUSE	Uhrf1	E3 ubiquitin-protein ligase UHRF1	27188.9	53322.5	23346.7	37402.3	38515.6	28107.3	33606.3	60296.3	0.273175	-0.133158	0.495146
sp|Q61165|SL9A1_MOUSE	Q61165	SL9A1_MOUSE	Slc9a1	Sodium/hydrogen exchanger 1	55136	35303.2	72083.2	54960	14311.7	60583.8	36911.6	27480.7	0.27207	0.76237	-0.217989
sp|Q6P5B0|RRP12_MOUSE	Q6P5B0	RRP12_MOUSE	Rrp12	RRP12-like protein	29430.5	47317.3	25546.2	44407.4	41224.4	22423.2	45824.9	53652	0.270017	0.136291	0.644254
tr|E9QN31|E9QN31_MOUSE	E9QN31	E9QN31_MOUSE	Nop2	Putative ribosomal RNA methyltransferase NOP2	28290.3	43141.7	31770	38161.6	37091.4	22160.6	41911.7	63803.5	0.269708	0.239082	0.835249
sp|Q91YE6|IPO9_MOUSE	Q91YE6	IPO9_MOUSE	Ipo9	Importin-9	23220.4	60521.4	38695	50352.4	48712.6	20801.3	18550.5	42707.1	0.268647	0.357272	-0.182414
sp|P52293|IMA1_MOUSE	P52293	IMA1_MOUSE	Kpna2	Importin subunit alpha-1	19742.3	56130.9	12984.6	57353.3	50975.7	12044.5	26929.4	49989.1	0.267777	0.158487	0.287516
sp|Q6A4J8|UBP7_MOUSE	Q6A4J8	UBP7_MOUSE	Usp7	Ubiquitin carboxyl-terminal hydrolase 7	32540.8	53767.9	32343.7	42966.9	35157.8	36533	30791.7	55946.5	0.267717	0.0710658	0.27488
sp|Q8BR65|SDS3_MOUSE	Q8BR65	SDS3_MOUSE	Suds3	Sin3 histone deacetylase corepressor complex component SDS3	30702.5	40548.6	23771.3	44448.4	38248.5	20978.7	38032.9	64656.7	0.266653	0.20393	0.793959
sp|Q91WJ8|FUBP1_MOUSE	Q91WJ8	FUBP1_MOUSE	Fubp1	Far upstream element-binding protein 1	35218.9	25069.5	23679.6	18050.8	19628.4	30568.7	100356	91128.7	0.264278	-0.266508	1.93155
sp|P30051|TEAD1_MOUSE	P30051	TEAD1_MOUSE	Tead1	Transcriptional enhancer factor TEF-1	26647	43291.3	33650.5	48562.2	37155.4	21077.7	45080.8	56275.1	0.264243	0.497521	0.799518
sp|P62137|PP1A_MOUSE	P62137	PP1A_MOUSE	Ppp1ca	Serine/threonine-protein phosphatase PP1-alpha catalytic subunit	30628.2	50436.1	32622.7	49404.5	37296.7	30205.1	33169.7	50877	0.264141	0.281177	0.316267
sp|Q69ZS7|HBS1L_MOUSE	Q69ZS7	HBS1L_MOUSE	Hbs1l	HBS1-like protein	32413.7	61503.7	34391.9	44621.2	44172.9	34035.6	25332.7	47574.3	0.264069	0.0147674	-0.101267
sp|Q9WUQ2|PREB_MOUSE	Q9WUQ2	PREB_MOUSE	Preb	Prolactin regulatory element-binding protein	23894.4	47093.3	26549.9	43747.5	39401.2	19858.2	41789.7	58788.3	0.260524	0.246428	0.763198
sp|Q5SF07|IF2B2_MOUSE	Q5SF07	IF2B2_MOUSE	Igf2bp2	Insulin-like growth factor 2 mRNA-binding protein 2	35554.3	53160.9	30817	51320.8	49377.1	24818.7	30810.8	39810.8	0.257845	0.146709	-0.0712286
sp|P20263|PO5F1_MOUSE	P20263	PO5F1_MOUSE	Pou5f1	POU domain, class 5, transcription factor 1	15855.8	61901.9	15321.4	58442.9	61452	3669.42	16163.2	44617.4	0.255853	0.179791	-0.0995207
sp|Q5HZJ0|RNC_MOUSE	Q5HZJ0	RNC_MOUSE	Drosha	Ribonuclease 3	30795.2	39789.6	22807.6	35897.4	39769.8	19393.2	51075.5	68755.9	0.254662	-0.0112114	1.01824
sp|Q9DAW6|PRP4_MOUSE	Q9DAW6	PRP4_MOUSE	Prpf4	U4/U6 small nuclear ribonucleoprotein Prp4	33203.5	45529	31550.2	45468	39323.1	26688.7	30369.2	57862.5	0.254237	0.222479	0.418575
sp|Q80Y17|L2GL1_MOUSE	Q80Y17	L2GL1_MOUSE	Llgl1	Lethal(2) giant larvae protein homolog 1	16612.3	62597.9	30025.8	49088.5	40386.8	26034.5	23010.7	43582.8	0.254041	0.252293	0.00373587
sp|Q9D8W5|PSD12_MOUSE	Q9D8W5	PSD12_MOUSE	Psmd12	26S proteasome non-ATPase regulatory subunit 12	18852.6	60754	19732	57316.5	50018.4	16743.8	16978.8	48033	0.253857	0.206736	-0.0383317
sp|Q9DAA6|EXOS1_MOUSE	Q9DAA6	EXOS1_MOUSE	Exosc1	Exosome complex component CSL4	38880.5	44197	34799.3	55084	41461.2	28243.6	36044.2	43341	0.2532	0.366797	0.187612
sp|Q9D1G1|RAB1B_MOUSE	Q9D1G1	RAB1B_MOUSE	Rab1b	Ras-related protein Rab-1B	28469	55854.2	40675.5	40967.1	37529.6	33224.2	28311.9	50043	0.253124	0.206516	0.147217
sp|Q9JHW4|SELB_MOUSE	Q9JHW4	SELB_MOUSE	Eefsec	Selenocysteine-specific elongation factor	15098	64114.1	13161.7	55848.5	54811.1	11659.3	15680.1	48345	0.253008	0.0540974	-0.0540755
sp|Q924C1|XPO5_MOUSE	Q924C1	XPO5_MOUSE	Xpo5	Exportin-5	25911.9	61618.8	38743.7	44141.6	46049.3	27427	23950.2	43345.7	0.25251	0.173838	-0.126761
sp|P35441|TSP1_MOUSE	P35441	TSP1_MOUSE	Thbs1	Thrombospondin-1	18793	55536.2	19330.4	50617.8	45353.8	17044.2	24312.9	50582.1	0.252429	0.164787	0.263369
sp|Q9Z205-2|RFXK_MOUSE	Q9Z205-2	RFXK_MOUSE	Rfxank	Isoform Short of DNA-binding protein RFXANK	31499.2	44630.2	23309.9	50442.5	38233.3	25695	37911.3	59491.5	0.251998	0.206235	0.607508
sp|Q8K385|FRRS1_MOUSE	Q8K385	FRRS1_MOUSE	FRRS1	Ferric-chelate reductase 1	42965.2	44920	58161.3	37450.8	26763	47055.3	44270.8	43489.5	0.251641	0.373214	0.24959
sp|Q8R2U0|SEH1_MOUSE	Q8R2U0	SEH1_MOUSE	Seh1l	Nucleoporin SEH1	33382.9	47920.4	27551.8	35461.2	37224.8	31117.3	42728.7	57619.7	0.250541	-0.117124	0.554172
sp|Q8VI84|NOC3L_MOUSE	Q8VI84	NOC3L_MOUSE	Noc3l	Nucleolar complex protein 3 homolog	29927.9	42992.4	25946.5	40950.3	36110.4	25258.7	62660	55188.4	0.24881	0.124426	0.94135
sp|P42208|SEPT2_MOUSE	P42208	SEPT2_MOUSE	42249	Septin-2	26923.4	49421.9	23392.6	48231.6	46602.5	17702.8	26226.4	55742.1	0.247603	0.15551	0.350135
sp|O35134|RPA1_MOUSE	O35134	RPA1_MOUSE	Polr1a	DNA-directed RNA polymerase I subunit RPA1	24925	49160.2	24749.9	47067.3	39979.8	22477.3	32242.2	59359.8	0.246318	0.201461	0.552513
sp|Q8CH18|CCAR1_MOUSE	Q8CH18	CCAR1_MOUSE	Ccar1	Cell division cycle and apoptosis regulator protein 1	27388	36968.6	22703.4	32797.4	29527	24810.3	64334.8	78192.2	0.244144	0.0305634	1.39122
sp|O35621|PMM1_MOUSE	O35621	PMM1_MOUSE	Pmm1	Phosphomannomutase 1	10356.8	60664.3	19141.4	49572.4	46739.1	13235.1	27212.6	59676.4	0.243905	0.196256	0.534831
sp|Q8C0C7|SYFA_MOUSE	Q8C0C7	SYFA_MOUSE	Farsa	Phenylalanine--tRNA ligase alpha subunit	10245.9	65663.2	12087.3	60575.1	48832	15394.3	15007.8	49125.7	0.241109	0.178046	-0.00208469
sp|Q5U4C1|GASP1_MOUSE	Q5U4C1	GASP1_MOUSE	Gprasp1	G-protein coupled receptor-associated sorting protein 1	43003.2	45313	29153.3	43530.2	42939.3	31789	27422.9	48700.3	0.241022	-0.040027	0.02668
sp|Q5SSI6|UTP18_MOUSE	Q5SSI6	UTP18_MOUSE	Utp18	U3 small nucleolar RNA-associated protein 18 homolog	29469.4	46514.2	25645.9	41221.2	40251.9	24078.3	40606.4	59424.5	0.240192	0.0558015	0.636877
sp|P70122|SBDS_MOUSE	P70122	SBDS_MOUSE	Sbds	Ribosome maturation protein SBDS	32936.7	53658.6	27382.6	44302.6	43575.9	29753.9	23295.5	54416.3	0.239889	-0.0327245	0.0837331
sp|Q9DC28|KC1D_MOUSE	Q9DC28	KC1D_MOUSE	Csnk1d	Casein kinase I isoform delta	37219	35867.3	46725.8	44625.6	32524.9	29398.6	44876.3	56335.5	0.239114	0.560941	0.708818
sp|A6H611|MIPEP_MOUSE	A6H611	MIPEP_MOUSE	Mipep	Mitochondrial intermediate peptidase	25795.9	58936.4	31819.9	60157.4	34468.2	37332.9	28691.2	40346.8	0.238907	0.357272	-0.0566162
sp|Q8BU30|SYIC_MOUSE	Q8BU30	SYIC_MOUSE	Iars	Isoleucine--tRNA ligase, cytoplasmic	14046.1	62076.7	16976.3	54641.4	48994.9	15525.6	15735.8	49399.4	0.238571	0.150562	0.0136824
sp|P62196|PRS8_MOUSE	P62196	PRS8_MOUSE	Psmc5	26S protease regulatory subunit 8	30315.1	57812.8	42712.7	60802.8	28872.6	45853.6	31926.5	29385.8	0.237983	0.470159	-0.28544
sp|Q5XG71|UTP20_MOUSE	Q5XG71	UTP20_MOUSE	Utp20	Small subunit processome component 20 homolog	25809.3	50935.5	20594.8	41998.7	36234.3	28908.4	34877.8	62544.9	0.236465	-0.0575907	0.580655
sp|O70310|NMT1_MOUSE	O70310	NMT1_MOUSE	Nmt1	Glycylpeptide N-tetradecanoyltransferase 1	31652.4	39993.8	27623.6	43102.1	36127.5	24743.2	52354.8	60432	0.235142	0.216486	0.889778
sp|Q8CHI8|EP400_MOUSE	Q8CHI8	EP400_MOUSE	Ep400	E1A-binding protein p400	31191.2	47249.5	38248.4	30468.2	38279.9	28453.2	45505.8	56832.5	0.233201	0.0422557	0.616872
sp|Q9D0L7|ARM10_MOUSE	Q9D0L7	ARM10_MOUSE	Armc10	Armadillo repeat-containing protein 10	26120.2	52727.3	25309	50292.7	47111.8	20013.3	18006.5	57261	0.232213	0.171566	0.165176
sp|Q505D1|ANR28_MOUSE	Q505D1	ANR28_MOUSE	Ankrd28	Serine/threonine-protein phosphatase 6 regulatory ankyrin repeat subunit A	21456.9	65674.3	24909.1	47631.7	51981.8	22202.4	15827.2	43754.7	0.232079	-0.0323198	-0.316238
sp|Q924K8|MTA3_MOUSE	Q924K8	MTA3_MOUSE	Mta3	Metastasis-associated protein MTA3	33916.3	47678.2	29311.6	44969.8	41590.3	27905.3	38097.1	53360.2	0.23155	0.09608	0.396178
sp|Q810A7|DDX42_MOUSE	Q810A7	DDX42_MOUSE	Ddx42	ATP-dependent RNA helicase DDX42	35381	36290.2	37057.8	32596.2	33537.8	27543.2	61729.3	68517.2	0.230668	0.18948	1.09245
sp|P70227|ITPR3_MOUSE	P70227	ITPR3_MOUSE	Itpr3	Inositol 1,4,5-trisphosphate receptor type 3	17680.9	60607.9	10597.1	42130.3	54185.9	12683.4	13849	63222.6	0.227465	-0.342789	0.204858
sp|Q6ZPV2|INO80_MOUSE	Q6ZPV2	INO80_MOUSE	Ino80	DNA helicase INO80	16127.4	60100.6	23501.3	42100	36945.8	28183.7	34936.1	55702.4	0.227011	0.0104127	0.476812
sp|P28740|KIF2A_MOUSE	P28740	KIF2A_MOUSE	Kif2a	Kinesin-like protein KIF2A	58391.2	37993.2	62259	38623.7	40397.1	41958.2	37654.2	34819.4	0.22694	0.292747	-0.184405
sp|Q64674|SPEE_MOUSE	Q64674	SPEE_MOUSE	Srm	Spermidine synthase	28626.7	55945.5	40379.1	46406.8	40356.3	31993.6	32448.5	45312.3	0.225193	0.26247	0.104052
sp|Q61292|LAMB2_MOUSE	Q61292	LAMB2_MOUSE	Lamb2	Laminin subunit beta-2	29341.4	56584.7	37962.1	46238.2	47748.3	25765.9	18072	40434.5	0.225074	0.195802	-0.329426
sp|P70268|PKN1_MOUSE	P70268	PKN1_MOUSE	Pkn1	Serine/threonine-protein kinase N1	37027.2	58258.6	50855.9	51551.8	35041.4	46582.1	30218.1	33129.2	0.223278	0.327268	-0.365701
sp|Q91WD5|NDUS2_MOUSE	Q91WD5	NDUS2_MOUSE	Ndufs2	NADH dehydrogenase [ubiquinone] iron-sulfur protein 2, mitochondrial	24564.9	51904.8	46805.9	56908	44701.4	20860.7	28251	47366.6	0.222025	0.661676	0.205859
sp|Q8VDW0|DX39A_MOUSE	Q8VDW0	DX39A_MOUSE	Ddx39a	ATP-dependent RNA helicase DDX39A	31427.8	50536.7	27112.7	45821.3	48960	21407.3	30060.9	52670.4	0.220093	0.0516847	0.233528
sp|Q8VCB1|NDC1_MOUSE	Q8VCB1	NDC1_MOUSE	Ndc1	Nucleoporin NDC1	25848.6	48389.7	24215	41327.9	40354.3	23391	34874.5	54956.8	0.219846	0.04012	0.494901
sp|P02469|LAMB1_MOUSE	P02469	LAMB1_MOUSE	Lamb1	Laminin subunit beta-1	19597.3	59335.1	21804.4	54489.3	47150.4	20628	18148	43396.5	0.219791	0.170738	-0.139197
sp|Q8C1D8|IWS1_MOUSE	Q8C1D8	IWS1_MOUSE	Iws1	Protein IWS1 homolog	53175.1	38591.2	50342.5	40490.8	34256	44612.3	42136.5	43964.3	0.218518	0.203774	0.126579
sp|Q6A026|PDS5A_MOUSE	Q6A026	PDS5A_MOUSE	Pds5a	Sister chromatid cohesion protein PDS5 homolog A	24053.7	61667.4	27337.6	49133.8	45125.8	28557.9	27087	45932.9	0.218304	0.0535732	-0.0130565
sp|A2BE28|LAS1L_MOUSE	A2BE28	LAS1L_MOUSE	Las1l	Ribosomal biogenesis protein LAS1L	29864.4	56426.8	30647.4	32372.1	44093.5	30094.8	30126.2	52299.8	0.218019	-0.235395	0.151906
sp|Q61510|TRI25_MOUSE	Q61510	TRI25_MOUSE	Trim25	E3 ubiquitin/ISG15 ligase TRIM25	25341.2	54639.6	20155.4	51911.6	46490.3	22275.5	28417.3	47119.2	0.217963	0.0676474	0.135483
sp|Q6ZQ08|CNOT1_MOUSE	Q6ZQ08	CNOT1_MOUSE	Cnot1	CCR4-NOT transcription complex subunit 1	22771.5	61308.8	22557.8	53197.9	51291.1	21013.2	21167.2	42076.6	0.217687	0.0672738	-0.193157
sp|Q9D6Z1|NOP56_MOUSE	Q9D6Z1	NOP56_MOUSE	Nop56	Nucleolar protein 56	25171.8	45995.9	22536	46458.7	41206.3	20012.8	47078.8	58330.3	0.21724	0.172503	0.783945
sp|Q8VCH8|UBXN4_MOUSE	Q8VCH8	UBXN4_MOUSE	Ubxn4	UBX domain-containing protein 4	19835.3	58401.6	30886.4	51665.6	51405.2	15942.9	20345.2	49534	0.216213	0.293665	0.0532258
sp|Q80X82|SYMPK_MOUSE	Q80X82	SYMPK_MOUSE	Sympk	Symplekin	20323.7	51014.7	20886.4	47759.3	38718.2	22709.4	38339.4	61053	0.215792	0.160281	0.694249
sp|Q5SUF2|LC7L3_MOUSE	Q5SUF2	LC7L3_MOUSE	Luc7l3	Luc7-like protein 3	23369.9	22669.2	20423.5	14389.9	16983.1	22670.2	114434	100163	0.215422	-0.1878	2.43611
sp|Q64467|G3PT_MOUSE	Q64467	G3PT_MOUSE	Gapdhs	Glyceraldehyde-3-phosphate dehydrogenase, testis-specific	11701.5	64914.7	14866.3	58909.6	50205.3	15792.9	9996.68	46853.3	0.215223	0.160722	-0.215268
sp|Q8BMB0|EMSY_MOUSE	Q8BMB0	EMSY_MOUSE	Emsy	Protein EMSY	26789.8	52631	26826.4	47130.9	39278.3	29165.4	28482.9	53422.8	0.2146	0.111775	0.259048
sp|Q9D071|MMS19_MOUSE	Q9D071	MMS19_MOUSE	Mms19	MMS19 nucleotide excision repair protein homolog	29274.1	63173	42234.5	49189.9	37325.5	42345.6	23210.3	38319.5	0.214571	0.198524	-0.372772
sp|Q02614|S30BP_MOUSE	Q02614	S30BP_MOUSE	Sap30bp	SAP30-binding protein	34140.2	50376.5	33012.5	42433.3	41200.9	31723.7	35536.4	48602.6	0.21283	0.0490351	0.206368
sp|Q60973|RBBP7_MOUSE	Q60973	RBBP7_MOUSE	Rbbp7	Histone-binding protein RBBP7	34668	43246.1	30365	59075.3	37505.1	29743.1	31329	48922.6	0.21239	0.41143	0.255034
sp|Q9ESX5|DKC1_MOUSE	Q9ESX5	DKC1_MOUSE	Dkc1	H/ACA ribonucleoprotein complex subunit 4	34292.7	41744.6	24010.5	43473.5	44178.3	21492.1	42985.7	58291	0.211464	0.0393013	0.624988
sp|Q80W54|FACE1_MOUSE	Q80W54	FACE1_MOUSE	Zmpste24	CAAX prenyl protease 1 homolog	97675.5	31168.8	67760.8	31795.9	36871.5	74438	44771.4	20557.3	0.211052	-0.160987	-0.768787
sp|Q9CSN1|SNW1_MOUSE	Q9CSN1	SNW1_MOUSE	Snw1	SNW domain-containing protein 1	43750.3	34684.3	32583.2	28448.7	31124.5	36647.9	80903.3	59713.8	0.210791	-0.151137	1.053
sp|P56546|CTBP2_MOUSE	P56546	CTBP2_MOUSE	Ctbp2	C-terminal-binding protein 2	20692.5	54893.1	24921.3	47652.3	44718.3	20605.4	21342.4	58233	0.210506	0.15184	0.284716
sp|Q9CQW2|ARL8B_MOUSE	Q9CQW2	ARL8B_MOUSE	Arl8b	ADP-ribosylation factor-like protein 8B	23560.6	53751.6	30315.1	56547.9	44571.1	22308.8	24602.8	48406.5	0.209126	0.377172	0.126508
tr|Q91V89|Q91V89_MOUSE	Q91V89	Q91V89_MOUSE	Ppp2r5d	Protein Ppp2r5d	48174.7	44185.4	44086.1	40110.7	34161.2	45737.5	95805.1	29248.9	0.209097	0.0755919	0.646306
sp|Q60520|SIN3A_MOUSE	Q60520	SIN3A_MOUSE	Sin3a	Paired amphipathic helix protein Sin3a	29400.4	45959	30539.3	38220.2	40156	25051.5	37911.6	63620.8	0.208749	0.0765205	0.638829
sp|P56960|EXOSX_MOUSE	P56960	EXOSX_MOUSE	Exosc10	Exosome component 10	25170.8	44990.1	23440.1	44213.4	39431	21358.3	40374.3	61016.4	0.206852	0.154349	0.738036
sp|Q8BFY9|TNPO1_MOUSE	Q8BFY9	TNPO1_MOUSE	Tnpo1	Transportin-1	46621.5	50238.4	38851.7	47137.1	41305.1	42739	33033.5	36098.9	0.204755	0.0330041	-0.281785
sp|Q8R3N1|NOP14_MOUSE	Q8R3N1	NOP14_MOUSE	Nop14	Nucleolar protein 14	34150.6	47877.4	36384.6	41001.7	43137.2	28040.4	41709	49249.4	0.204694	0.120656	0.353783
sp|Q8VE37|RCC1_MOUSE	Q8VE37	RCC1_MOUSE	Rcc1	Regulator of chromosome condensation	31603.9	43236.7	29180.5	40621	35430.5	29520.9	44970.1	58144.1	0.204461	0.103896	0.666809
sp|Q9CU62|SMC1A_MOUSE	Q9CU62	SMC1A_MOUSE	Smc1a	Structural maintenance of chromosomes protein 1A	56515.3	38364.7	59207.1	38184.4	34299.8	48077	45698.9	40310.9	0.203866	0.241556	0.0622634
sp|Q9JII5|DAZP1_MOUSE	Q9JII5	DAZP1_MOUSE	Dazap1	DAZ-associated protein 1	26649.6	33488.8	25235.5	32792.7	26127.3	26114.9	72315.9	76752.8	0.203068	0.151537	1.51269
sp|Q8BWT5|DIP2A_MOUSE	Q8BWT5	DIP2A_MOUSE	Dip2a	Disco-interacting protein 2 homolog A	59577.9	31345.9	118476	28272.3	14026.9	65026.2	46084.7	30750	0.201836	0.892446	-0.0410657
sp|Q9CR08|RPP29_MOUSE	Q9CR08	RPP29_MOUSE	Pop4	Ribonuclease P protein subunit p29	23262.8	47037.8	24702.4	44265	39002.3	22223.5	36287.9	61534.1	0.199398	0.171776	0.67602
sp|Q99J95|CDK9_MOUSE	Q99J95	CDK9_MOUSE	Cdk9	Cyclin-dependent kinase 9	29011.4	58095.4	26339.9	50821.3	43067.6	32798.9	30583.6	42454.8	0.199321	0.0244116	-0.0548081
sp|Q9D903|EBP2_MOUSE	Q9D903	EBP2_MOUSE	Ebna1bp2	Probable rRNA-processing protein EBP2	63867.1	36997.1	60162.7	39935.9	33787.2	54109	58261.9	32008	0.198543	0.187549	0.0384437
sp|Q9CPS7|PNO1_MOUSE	Q9CPS7	PNO1_MOUSE	Pno1	RNA-binding protein PNO1	40223.3	42778.2	41366.1	47324.1	39719.7	32615.8	32799.9	51909.5	0.198431	0.294068	0.227818
sp|Q05920|PYC_MOUSE	Q05920	PYC_MOUSE	Pc	Pyruvate carboxylase, mitochondrial	42180.3	37151.7	39700.3	55175.1	43883.2	25258.1	46209	34385.9	0.198355	0.456485	0.22114
sp|Q8K4B0|MTA1_MOUSE	Q8K4B0	MTA1_MOUSE	Mta1	Metastasis-associated protein MTA1	27268.4	41660.6	23484.6	43299.9	40845.8	19296.6	36285	66720.6	0.196731	0.151131	0.776269
sp|Q4VA53|PDS5B_MOUSE	Q4VA53	PDS5B_MOUSE	Pds5b	Sister chromatid cohesion protein PDS5 homolog B	31612.3	47905.1	31900	43201.6	41263.6	28123.4	37701.4	52201.9	0.196605	0.114176	0.373708
sp|Q9Z0N1|IF2G_MOUSE	Q9Z0N1	IF2G_MOUSE	Eif2s3x	Eukaryotic translation initiation factor 2 subunit 3, X-linked	42397.8	42681	36917.3	43217.9	34854.8	39386.8	47184.5	46955.6	0.196572	0.110207	0.34258
sp|Q91VX2|UBAP2_MOUSE	Q91VX2	UBAP2_MOUSE	Ubap2	Ubiquitin-associated protein 2	21037	51192.6	9436.32	42372	44012.1	19017.6	26709.5	66922.4	0.196558	-0.282847	0.57097
sp|Q921N6|DDX27_MOUSE	Q921N6	DDX27_MOUSE	Ddx27	Probable ATP-dependent RNA helicase DDX27	29995.7	45642.7	29542.5	39662	39652.8	26360	49170.8	54785.7	0.196373	0.0681224	0.655163
sp|Q05512|MARK2_MOUSE	Q05512	MARK2_MOUSE	Mark2	Serine/threonine-protein kinase MARK2	23565	60117.2	21579.7	49705.5	48037.7	25073.4	26422.1	48164.9	0.194831	-0.0364886	0.0288327
sp|P62754|RS6_MOUSE	P62754	RS6_MOUSE	Rps6	40S ribosomal protein S6	49449.5	38707.6	51794.9	40367.5	39257.3	37764	49328.9	44266.8	0.194819	0.258921	0.281184
sp|Q3TJD7|PDLI7_MOUSE	Q3TJD7	PDLI7_MOUSE	Pdlim7	PDZ and LIM domain protein 7	27432.2	50130.1	25327.2	44695.5	44903.3	22901.5	40083.7	52812.3	0.193969	0.0464336	0.454229
sp|P12970|RL7A_MOUSE	P12970	RL7A_MOUSE	Rpl7a	60S ribosomal protein L7a	42469	41579.5	42904.9	45449.9	37108.8	36375.5	48091.9	46212.9	0.193785	0.265872	0.359895
sp|Q8R1A4|DOCK7_MOUSE	Q8R1A4	DOCK7_MOUSE	Dock7	Dedicator of cytokinesis protein 7	22857.2	51801.3	22692.3	44800	44219.1	21099.9	28115	59210.3	0.192805	0.04722	0.418898
sp|Q78PY7|SND1_MOUSE	Q78PY7	SND1_MOUSE	Snd1	Staphylococcal nuclease domain-containing protein 1	31520	53750.1	43857.1	50466.3	34526.6	40083.4	32993.4	37318.9	0.192671	0.338246	-0.0855911
sp|Q8BQZ5|CPSF4_MOUSE	Q8BQZ5	CPSF4_MOUSE	Cpsf4	Cleavage and polyadenylation specificity factor subunit 4	30902.4	39182.2	33599.4	47331.4	33828.1	27497.2	52678.7	53595.6	0.192616	0.400207	0.793239
tr|Q921K2|Q921K2_MOUSE	Q921K2	Q921K2_MOUSE	Parp1	Poly (ADP-ribose) polymerase family, member 1	31857.1	48482.7	23995.2	43002.7	40920.3	29418.3	36311.2	53686.8	0.191798	-0.0702024	0.355576
sp|Q9CWU9|NUP37_MOUSE	Q9CWU9	NUP37_MOUSE	Nup37	Nucleoporin Nup37	29212.8	46986.2	27516.1	41643.5	41379.7	25380.7	38329.3	59021.3	0.19078	0.0509365	0.544197
sp|Q8BWZ3|NAA25_MOUSE	Q8BWZ3	NAA25_MOUSE	Naa25	N-alpha-acetyltransferase 25, NatB auxiliary subunit	27080.4	59842.5	46641.4	48268.5	43586.4	32798.6	27378.9	43350.4	0.186447	0.313271	-0.110979
sp|Q99LB2|DHRS4_MOUSE	Q99LB2	DHRS4_MOUSE	Dhrs4	Dehydrogenase/reductase SDR family member 4	53576.9	41048.5	46621	47632.1	35577.3	47613.5	40657.8	41716.2	0.185804	0.180117	-0.0142336
sp|Q925I1|ATAD3_MOUSE	Q925I1	ATAD3_MOUSE	Atad3	ATPase family AAA domain-containing protein 3	30359.7	50341.3	23012.8	60720.2	49645	21364.9	25065.3	49085.4	0.184566	0.237775	0.0624375
sp|Q9EPL8|IPO7_MOUSE	Q9EPL8	IPO7_MOUSE	Ipo7	Importin-7	22698.6	65451.9	29065.1	52514.8	45667.9	31915.1	25551.8	40877.8	0.184229	0.0724729	-0.223914
sp|P35922|FMR1_MOUSE	P35922	FMR1_MOUSE	Fmr1	Fragile X mental retardation protein 1 homolog	17315.8	58546	19726	50139.1	48627.2	18171.4	30366.2	49170.5	0.183555	0.064752	0.251802
sp|P63280|UBC9_MOUSE	P63280	UBC9_MOUSE	Ube2i	SUMO-conjugating enzyme UBC9	70743.6	37513.3	81290	47040.7	14489.5	80856	60042.8	17054.4	0.183222	0.428629	-0.306486
sp|Q8VDR9|DOCK6_MOUSE	Q8VDR9	DOCK6_MOUSE	Dock6	Dedicator of cytokinesis protein 6	16805.7	58315.1	16395	53911	51244.5	14980.6	18735.2	49669.9	0.181835	0.0862688	0.0467271
sp|Q6ZPR5|NSMA3_MOUSE	Q6ZPR5	NSMA3_MOUSE	Smpd4	Sphingomyelin phosphodiesterase 4	27560.9	51855.6	34896.4	43761.5	43026.9	26999.9	28559.3	62689.3	0.181532	0.167684	0.381896
sp|Q61656|DDX5_MOUSE	Q61656	DDX5_MOUSE	Ddx5	Probable ATP-dependent RNA helicase DDX5	45898.5	33366.9	46707.2	29645.2	31709.1	38254.5	60589.6	56080.8	0.180088	0.126069	0.737762
sp|Q8BGC0|HTSF1_MOUSE	Q8BGC0	HTSF1_MOUSE	Htatsf1	HIV Tat-specific factor 1 homolog	21303.3	57306.4	22291.9	48993.5	43976	25428.9	32200.9	52071.8	0.179669	0.0385692	0.280026
sp|Q61550|RAD21_MOUSE	Q61550	RAD21_MOUSE	Rad21	Double-strand-break repair protein rad21 homolog	72095	32947.5	71585	36471.4	32701.4	60054.9	74703	33783.7	0.179455	0.220266	0.226
sp|Q6P9P6|KIF11_MOUSE	Q6P9P6	KIF11_MOUSE	Kif11	Kinesin-like protein KIF11	19545.2	58164.3	25115.5	46641.3	47859.3	20821.4	26055.8	48828.5	0.178187	0.0632123	0.124758
sp|P61804|DAD1_MOUSE	P61804	DAD1_MOUSE	Dad1	Dolichyl-diphosphooligosaccharide--protein glycosyltransferase subunit DAD1	48872.3	45999.3	60721.1	36482.1	33903.8	49999.7	26784.1	48604.8	0.177245	0.212272	-0.154379
sp|P40694|SMBP2_MOUSE	P40694	SMBP2_MOUSE	Ighmbp2	DNA-binding protein SMUBP-2	25001.1	60846.3	24568.5	52894.4	50593.6	25343.5	18876.4	45547.9	0.176969	0.0287014	-0.237199
sp|P49717|MCM4_MOUSE	P49717	MCM4_MOUSE	Mcm4	DNA replication licensing factor MCM4	17558.4	56867.8	24964.1	54197.4	48022.5	17901.1	17458.5	53729.3	0.175015	0.264005	0.110835
sp|Q8BJW5|NOL11_MOUSE	Q8BJW5	NOL11_MOUSE	Nol11	Nucleolar protein 11	21283.5	44018.1	21449.8	43124.6	39899	17967.4	34391	67671.8	0.174395	0.158239	0.818662
sp|Q9CPQ3|TOM22_MOUSE	Q9CPQ3	TOM22_MOUSE	Tomm22	Mitochondrial import receptor subunit TOM22 homolog	79117	22790.3	100205	23405.8	27507.5	62808.5	57189.8	33577.2	0.174203	0.452747	0.00718542
tr|B2RQG2|B2RQG2_MOUSE	B2RQG2	B2RQG2_MOUSE	Phf3	PHD finger protein 3	24215.9	30489.6	17414.8	27221.7	30853	17670.4	55240.6	94329.7	0.173008	-0.120457	1.62407
sp|Q9D0W5|PPIL1_MOUSE	Q9D0W5	PPIL1_MOUSE	Ppil1	Peptidyl-prolyl cis-trans isomerase-like 1	27573.6	46335.5	27022.4	54855.1	49520.4	16043.9	28283.3	53630	0.17284	0.320555	0.321188
sp|Q8BYL4|SYYM_MOUSE	Q8BYL4	SYYM_MOUSE	Yars2	Tyrosine--tRNA ligase, mitochondrial	25461.4	53959.2	39505.3	73245.1	31140.5	39317.6	26318.8	32929.2	0.172749	0.678296	-0.249996
sp|P51410|RL9_MOUSE	P51410	RL9_MOUSE	Rpl9	60S ribosomal protein L9	41735	45413.1	37407.3	50580.1	40709	36612.8	35115.9	43882.9	0.172593	0.186419	0.0309541
sp|Q1HFZ0|NSUN2_MOUSE	Q1HFZ0	NSUN2_MOUSE	Nsun2	tRNA (cytosine(34)-C(5))-methyltransferase	18370.2	61985.2	21386.2	50666.8	48221.3	23105.3	21160.1	49826.1	0.171955	0.0146193	-0.00690052
sp|Q9D1R9|RL34_MOUSE	Q9D1R9	RL34_MOUSE	Rpl34	60S ribosomal protein L34	44156.7	45031	35124.8	42662.2	48175.4	31012.3	40562.8	41138.8	0.171569	-0.0257473	0.0450889
sp|Q9CWT6|DDX28_MOUSE	Q9CWT6	DDX28_MOUSE	Ddx28	Probable ATP-dependent RNA helicase DDX28	24401.6	56820.2	29009.8	58786.2	51478.9	20730.4	24666.6	37882.8	0.169682	0.281969	-0.207189
sp|Q80W47|WIPI2_MOUSE	Q80W47	WIPI2_MOUSE	Wipi2	WD repeat domain phosphoinositide-interacting protein 2	17261.4	59424.1	30975.1	52794.6	44693	23484	23862	43788	0.169671	0.297145	-0.0111933
sp|Q3ULJ0|GPD1L_MOUSE	Q3ULJ0	GPD1L_MOUSE	Gpd1l	Glycerol-3-phosphate dehydrogenase 1-like protein	25313.1	61291.6	35385.9	60909.5	42096.9	34918.5	19787.5	35244.7	0.169299	0.322319	-0.484871
sp|P12382|K6PL_MOUSE	P12382	K6PL_MOUSE	Pfkl	ATP-dependent 6-phosphofructokinase, liver type	11471.4	66568.7	20504.6	55634.5	53949.9	15573.4	12620	42828	0.166717	0.131139	-0.326363
sp|Q4FZF3|DDX49_MOUSE	Q4FZF3	DDX49_MOUSE	Ddx49	Probable ATP-dependent RNA helicase DDX49	40802	49757.9	52494.5	34711.2	31330.7	49356.5	42262.1	44438.2	0.166533	0.112084	0.103698
sp|Q8BQM4|HEAT3_MOUSE	Q8BQM4	HEAT3_MOUSE	Heatr3	HEAT repeat-containing protein 3	20128.2	58909.2	27141.2	55212.8	45285.7	25202	18556.2	46948.3	0.165165	0.224468	-0.105777
sp|Q6DVA0|LEMD2_MOUSE	Q6DVA0	LEMD2_MOUSE	Lemd2	LEM domain-containing protein 2	38622.2	36974.6	32922.9	30092.7	33721.3	33735.8	70471.1	58742.9	0.164356	-0.0982615	0.937722
sp|Q7TSS2|UB2Q1_MOUSE	Q7TSS2	UB2Q1_MOUSE	Ube2q1	Ubiquitin-conjugating enzyme E2 Q1	39305.3	56067.7	30175	51351.1	48061.2	37126.7	29417.8	37901.6	0.162933	-0.0633878	-0.339627
sp|Q9ESU6|BRD4_MOUSE	Q9ESU6	BRD4_MOUSE	Brd4	Bromodomain-containing protein 4	38789.7	44782.6	33739.5	39594.6	41391.8	33510.8	44665.3	50859.1	0.158007	-0.0305342	0.350853
sp|Q8BY71|HAT1_MOUSE	Q8BY71	HAT1_MOUSE	Hat1	Histone acetyltransferase type B catalytic subunit	18751.3	61076.1	22426.7	58055.1	52357.4	19205.9	15691.8	42685.7	0.157663	0.169442	-0.293807
sp|P52912|TIA1_MOUSE	P52912	TIA1_MOUSE	Tia1	Nucleolysin TIA-1	49288.8	32184.3	39748.5	27996.1	29569.5	43533.9	61281	50839.2	0.156385	-0.109832	0.617036
tr|E9Q4Y4|E9Q4Y4_MOUSE	E9Q4Y4	E9Q4Y4_MOUSE	Cep192	Protein Cep192	2813.08	76665.3	18065	46303.7	67336	4026.26	13046	39567.6	0.155401	-0.148802	-0.439726
sp|Q6ZWX6|IF2A_MOUSE	Q6ZWX6	IF2A_MOUSE	Eif2s1	Eukaryotic translation initiation factor 2 subunit 1	44160.5	39284.1	45108.9	43363.1	36747.9	38179.2	41924.6	50561.9	0.155332	0.239733	0.303755
sp|Q3US41|ESRP1_MOUSE	Q3US41	ESRP1_MOUSE	Esrp1	Epithelial splicing regulatory protein 1	49726.9	40114.6	43226.1	37633.3	37744	43013.8	42814.2	46681.8	0.153781	0.00181346	0.148221
sp|Q99ME2|WDR6_MOUSE	Q99ME2	WDR6_MOUSE	Wdr6	WD repeat-containing protein 6	22790.1	55149.6	49933.7	40838.2	41459.3	28625.5	23867.6	52667.6	0.153257	0.373143	0.127022
sp|Q6PGF7|EXOC8_MOUSE	Q6PGF7	EXOC8_MOUSE	Exoc8	Exocyst complex component 8	48760.8	44281.1	46726.5	48180.9	43122.7	40549.2	33964	41460.9	0.153137	0.181776	-0.149702
sp|P62849|RS24_MOUSE	P62849	RS24_MOUSE	Rps24	40S ribosomal protein S24	45725.6	33932.3	41811.9	43597.8	38067.8	33669.6	69017.9	43222.6	0.15109	0.251673	0.645794
sp|E9Q634|MYO1E_MOUSE	E9Q634	MYO1E_MOUSE	Myo1e	Unconventional myosin-Ie	39366.8	52510.9	47402.5	49404.6	43605.1	39153.9	28438.3	35831.8	0.150796	0.226195	-0.364769
sp|Q9R1A8|RFWD2_MOUSE	Q9R1A8	RFWD2_MOUSE	Rfwd2	E3 ubiquitin-protein ligase RFWD2	28370.9	42972.8	38222.2	36868.3	37648.5	26623.9	42997.9	66435.3	0.150585	0.22443	0.767778
sp|Q91XI1|DUS3L_MOUSE	Q91XI1	DUS3L_MOUSE	Dus3l	tRNA-dihydrouridine(47) synthase [NAD(P)(+)]-like	25410.8	40402.4	22150.9	33904.5	39538	19768.8	55682.5	72316.8	0.150179	-0.0813433	1.10987
sp|Q8JZS6|N42L2_MOUSE	Q8JZS6	N42L2_MOUSE	N4bp2l2	NEDD4-binding protein 2-like 2	30812.3	31380.1	19805.3	21725.4	26200.6	29849	87836.3	78109.3	0.150035	-0.432523	1.56594
sp|Q99MN9|PCCB_MOUSE	Q99MN9	PCCB_MOUSE	Pccb	Propionyl-CoA carboxylase beta chain, mitochondrial	44754.5	39918.7	51486.7	55788.3	42457.1	33878.3	41074.8	40512.8	0.149551	0.49089	0.0959955
tr|Q3U1M7|Q3U1M7_MOUSE	Q3U1M7	Q3U1M7_MOUSE	Zmynd8	Protein Zmynd8	46894.7	39450.5	44358.4	40750.6	29924.3	47985.6	54544	44094.6	0.148309	0.127504	0.340344
sp|P70279|SURF6_MOUSE	P70279	SURF6_MOUSE	Surf6	Surfeit locus protein 6	34712.3	35763.6	34927.4	33894.6	30010.4	33588.8	72257.2	64612.8	0.148121	0.113862	1.10573
sp|Q922H1|ANM3_MOUSE	Q922H1	ANM3_MOUSE	Prmt3	Protein arginine N-methyltransferase 3	25409.9	53796	25619.3	50221.6	43525.1	28030.3	32714.5	51079.5	0.146547	0.0839141	0.227786
sp|Q9DB85|RRP8_MOUSE	Q9DB85	RRP8_MOUSE	Rrp8	Ribosomal RNA-processing protein 8	27151.5	42579.3	31313.7	45616.1	37217.9	25787.2	46794.2	59981.8	0.146328	0.288073	0.761046
sp|Q8BT07|CEP55_MOUSE	Q8BT07	CEP55_MOUSE	Cep55	Centrosomal protein of 55 kDa	16317.6	60441.5	20167.2	57506	53414.6	15965	17550.3	42061.1	0.145827	0.162905	-0.218924
sp|Q922D4|PP6R3_MOUSE	Q922D4	PP6R3_MOUSE	Ppp6r3	Serine/threonine-protein phosphatase 6 regulatory subunit 3	19262.7	65622.9	29157.2	53524.8	50922.7	25814.4	23937.2	38891.8	0.145596	0.107649	-0.288494
sp|Q91YD3|DCP1A_MOUSE	Q91YD3	DCP1A_MOUSE	Dcp1a	mRNA-decapping enzyme 1A	38582.7	49452.4	34686.4	47515.2	39264.3	40333.6	34198	40995.7	0.145349	0.0464368	-0.0821179
sp|Q9CQC6|BZW1_MOUSE	Q9CQC6	BZW1_MOUSE	Bzw1	Basic leucine zipper and W2 domain-containing protein 1	20041.6	53988.6	25910.7	58610.1	49160.9	17782.5	23755.4	43997	0.145172	0.336364	0.0173316
sp|P62908|RS3_MOUSE	P62908	RS3_MOUSE	Rps3	40S ribosomal protein S3	47407.8	41830.6	52803.1	45337.3	39047.9	41668	39124.2	43497.5	0.144811	0.281993	0.0336674
sp|Q99LC2|CSTF1_MOUSE	Q99LC2	CSTF1_MOUSE	Cstf1	Cleavage stimulation factor subunit 1	29113.8	40943.1	26599.1	47767.9	38834.3	24538.8	37135.1	60300.7	0.144656	0.230793	0.620582
sp|P61211|ARL1_MOUSE	P61211	ARL1_MOUSE	Arl1	ADP-ribosylation factor-like protein 1	22674.8	60728.4	29522.3	51413.9	45882.6	29578.3	25082.2	44827.1	0.144373	0.101054	-0.110244
sp|P10922|H10_MOUSE	P10922	H10_MOUSE	H1f0	Histone H1.0	71685.9	13952.5	65696.4	15105.8	12061.8	65501.5	183462	12656.9	0.142884	0.0590222	1.33829
sp|A2A6A1|GPTC8_MOUSE	A2A6A1	GPTC8_MOUSE	Gpatch8	G patch domain-containing protein 8	29558	21650.6	22586.9	18460.4	17964.9	28440.4	100100	97912	0.142098	-0.177003	2.09322
sp|Q68FL6|SYMC_MOUSE	Q68FL6	SYMC_MOUSE	Mars	Methionine--tRNA ligase, cytoplasmic	11612	63782.8	15649.2	56249	52248.3	16094.9	15705.5	46337.8	0.141667	0.0731568	-0.139522
sp|Q8JZK9|HMCS1_MOUSE	Q8JZK9	HMCS1_MOUSE	Hmgcs1	Hydroxymethylglutaryl-CoA synthase, cytoplasmic	17797.3	62602	26116.2	52201.8	49679.6	23202	19956.7	43877.6	0.141628	0.10379	-0.191225
sp|P47962|RL5_MOUSE	P47962	RL5_MOUSE	Rpl5	60S ribosomal protein L5	39702.8	39812.2	40071.3	40928.9	39343.6	32748.6	43478.9	51144.4	0.141385	0.168083	0.392352
sp|Q9CYI4|LUC7L_MOUSE	Q9CYI4	LUC7L_MOUSE	Luc7l	Putative RNA-binding protein Luc7-like 1	31732.9	29167.3	40798.9	21151.1	14796.4	40419.4	103534	75469.9	0.141364	0.166024	1.69684
sp|P18654|KS6A3_MOUSE	P18654	KS6A3_MOUSE	Rps6ka3	Ribosomal protein S6 kinase alpha-3	70358.8	31090.1	179780	6185.17	23262.7	68718.1	70336.3	10621	0.141349	1.01563	-0.184171
sp|Q791V5|MTCH2_MOUSE	Q791V5	MTCH2_MOUSE	Mtch2	Mitochondrial carrier homolog 2	34589.5	44454.1	41703.3	56015.9	35260.5	36444.6	31620.3	44022.3	0.140574	0.446566	0.0771214
sp|Q9D1C9|RRP7A_MOUSE	Q9D1C9	RRP7A_MOUSE	Rrp7a	Ribosomal RNA-processing protein 7 homolog A	36579.4	42445	24991.7	47064.8	37085.5	34668.3	50161.4	50719.4	0.139245	0.00607495	0.491525
sp|O08848|RO60_MOUSE	O08848	RO60_MOUSE	Trove2	60 kDa SS-A/Ro ribonucleoprotein	76333.6	32712.5	107386	31235.5	35674.8	63404.1	52285.8	22659.7	0.138289	0.484507	-0.402737
sp|Q9WUM5|SUCA_MOUSE	Q9WUM5	SUCA_MOUSE	Suclg1	Succinyl-CoA ligase [ADP/GDP-forming] subunit alpha, mitochondrial	17600.7	59065.6	18893.8	74454.5	45974.9	23702.6	24054	30634	0.137898	0.421929	-0.349469
sp|A2AJT4|PNISR_MOUSE	A2AJT4	PNISR_MOUSE	Pnisr	Arginine/serine-rich protein PNISR	47855.2	21147.6	50280.1	31841.7	20166.8	42552.2	85748.5	61624.6	0.137753	0.388863	1.2325
sp|Q5SVQ0|KAT7_MOUSE	Q5SVQ0	KAT7_MOUSE	Kat7	Histone acetyltransferase KAT7	54114.9	42616.6	78494	29149.6	27502.8	60422.4	60469.5	34825.3	0.137709	0.291912	0.11612
sp|Q9D0M5|DYL2_MOUSE	Q9D0M5	DYL2_MOUSE	Dynll2	Dynein light chain 2, cytoplasmic	69067.9	33919.5	62427.7	37647.6	26915.8	66711.7	45859.8	35535.1	0.137464	0.0960811	-0.201994
sp|Q99KP6|PRP19_MOUSE	Q99KP6	PRP19_MOUSE	Prpf19	Pre-mRNA-processing factor 19	32914.1	40299.5	25296.6	41288.4	40539.4	26025.1	41717.6	60622.6	0.137359	0.000445656	0.620549
sp|Q9WVM1|RGAP1_MOUSE	Q9WVM1	RGAP1_MOUSE	Racgap1	Rac GTPase-activating protein 1	29183	52877.7	21406.8	47385.5	50447	24161.9	23036.7	43732.8	0.137343	-0.117099	-0.160158
sp|A2AGT5|CKAP5_MOUSE	A2AGT5	CKAP5_MOUSE	Ckap5	Cytoskeleton-associated protein 5	46546.4	45402.2	35236.5	47332.8	40517.2	43222.4	42643.8	39630.3	0.134918	-0.0203033	-0.0254701
sp|Q91XU3|PI42C_MOUSE	Q91XU3	PI42C_MOUSE	Pip4k2c	Phosphatidylinositol 5-phosphate 4-kinase type-2 gamma	16367.8	56298.6	30661.5	56454.6	41961.2	24230	32964.8	46812.3	0.134647	0.396297	0.269333
sp|O08528|HXK2_MOUSE	O08528	HXK2_MOUSE	Hk2	Hexokinase-2	13294.7	65916.8	19590.2	48800.1	53292.8	18902.2	19360.9	49913.5	0.13381	-0.0781067	-0.0595775
sp|Q61655|DD19A_MOUSE	Q61655	DD19A_MOUSE	Ddx19a	ATP-dependent RNA helicase DDX19A	30290.2	49026.3	76286.3	42564.4	40928.9	31441.3	26271.3	37953.9	0.132226	0.715683	-0.172258
sp|Q80U78|PUM1_MOUSE	Q80U78	PUM1_MOUSE	Pum1	Pumilio homolog 1	20219.8	51700.1	16015.3	52675.2	47369.9	18251.7	28819.4	51195.8	0.132222	0.0659399	0.286103
sp|Q8K2Y7|RM47_MOUSE	Q8K2Y7	RM47_MOUSE	Mrpl47	39S ribosomal protein L47, mitochondrial	49168.7	37422.3	84104.8	52397.6	33833	45250.6	29075.8	34715.3	0.130838	0.787475	-0.310025
sp|P49312|ROA1_MOUSE	P49312	ROA1_MOUSE	Hnrnpa1	Heterogeneous nuclear ribonucleoprotein A1	69909.5	32285.2	77857.5	28397.2	28220	65114.7	47802.1	29786.5	0.130836	0.187041	-0.266568
sp|Q9CQ48|NUDC2_MOUSE	Q9CQ48	NUDC2_MOUSE	Nudcd2	NudC domain-containing protein 2	21309.9	63877.6	22368.7	55227.1	48268.3	29562.1	17600.6	43789.1	0.130309	-0.00435484	-0.342338
sp|Q9CRC8|LRC40_MOUSE	Q9CRC8	LRC40_MOUSE	Lrrc40	Leucine-rich repeat-containing protein 40	19677.3	57674.6	26265.3	53965.6	45224.3	25496.6	27005.6	42347.7	0.129299	0.182021	-0.0281728
tr|Q6IQX8|Q6IQX8_MOUSE	Q6IQX8	Q6IQX8_MOUSE	Zfp219	Protein Zfp219	34946.9	47688.5	48865	41213.6	44903.2	30691	42517.6	46894.1	0.128485	0.252908	0.242188
sp|Q9ERV1|MKRN2_MOUSE	Q9ERV1	MKRN2_MOUSE	Mkrn2	Probable E3 ubiquitin-protein ligase makorin-2	15990.2	60562.1	19211.7	52818.6	51415.5	18618.5	22774.5	46441.3	0.12839	0.0405473	-0.0169541
tr|D3YYT1|D3YYT1_MOUSE	D3YYT1	D3YYT1_MOUSE	Glyr1	Putative oxidoreductase GLYR1	47069	39749.6	43613.2	35351.8	35021.4	44459.6	41933.5	49196.4	0.127394	-0.00939625	0.197314
sp|A2A7S8|K1522_MOUSE	A2A7S8	K1522_MOUSE	Kiaa1522	Uncharacterized protein KIAA1522	63292.7	47891.4	88916.8	20881.4	27874.3	73916.9	63814.6	15935.9	0.127339	0.109242	-0.352046
sp|Q99M74|KRT82_MOUSE	Q99M74	KRT82_MOUSE	Krt82	Keratin, type II cuticular Hb2	66786.5	34377.5	114715	36989.8	27512.8	65149.4	44394.8	22724.6	0.126643	0.711212	-0.465252
sp|Q9JJI8|RL38_MOUSE	Q9JJI8	RL38_MOUSE	Rpl38	60S ribosomal protein L38	49697.4	44892.4	48859.3	41844.5	34633.2	52043.5	37444.3	44130.7	0.12604	0.0655171	-0.0875178
tr|B2RQC6|B2RQC6_MOUSE	B2RQC6	B2RQC6_MOUSE	Cad	CAD protein	14794.5	65811.1	20719.8	55136.5	53684.4	20281.6	15410.8	39154.3	0.124017	0.0364041	-0.438885
sp|Q5U4D9|THOC6_MOUSE	Q5U4D9	THOC6_MOUSE	Thoc6	THO complex subunit 6 homolog	33908.2	48890.7	33028.2	53121.2	38345.5	37707.6	42263.3	40322.7	0.122605	0.179835	0.118892
sp|Q9DBR1|XRN2_MOUSE	Q9DBR1	XRN2_MOUSE	Xrn2	5'-3' exoribonuclease 2	42405.2	36467.8	45581	33418.6	35245	37343.6	51320.1	52640	0.119789	0.122102	0.518213
sp|P61255|RL26_MOUSE	P61255	RL26_MOUSE	Rpl26	60S ribosomal protein L26	44309.4	43792.4	54541.2	45092.7	41774.4	39308.7	37600	42495.6	0.11977	0.297235	-0.0176798
sp|P10493|NID1_MOUSE	P10493	NID1_MOUSE	Nid1	Nidogen-1	28120.9	50301.5	28345.2	43515.5	41599	30576.3	42075.5	48496.1	0.119759	-0.00630233	0.327554
sp|Q923Z3|MTO1_MOUSE	Q923Z3	MTO1_MOUSE	Mto1	Protein MTO1 homolog, mitochondrial	26387.3	57576.4	21431.3	68128.5	42045.3	35272.7	22061	35028.3	0.11896	0.212044	-0.437585
sp|Q9JJ11|TACC3_MOUSE	Q9JJ11	TACC3_MOUSE	Tacc3	Transforming acidic coiled-coil-containing protein 3	25714.1	54261.9	32922	67679	51530.8	22169	19677.7	35670.6	0.117906	0.448913	-0.413122
sp|Q8CHT3|INT5_MOUSE	Q8CHT3	INT5_MOUSE	Ints5	Integrator complex subunit 5	45043.7	46814	46653.9	40423.9	35508.9	49222.9	39642.1	45161.5	0.116497	0.0394012	0.00122071
sp|O35737|HNRH1_MOUSE	O35737	HNRH1_MOUSE	Hnrnph1	Heterogeneous nuclear ribonucleoprotein H	49432.4	39558.4	67570.5	28074.1	36584.8	45528.8	48491	36834.3	0.116035	0.220061	0.0553513
sp|Q8CGY8|OGT1_MOUSE	Q8CGY8	OGT1_MOUSE	Ogt	UDP-N-acetylglucosamine--peptide N-acetylglucosaminyltransferase 110 kDa subunit	27739.1	48874.8	31047.2	49843	45753.5	24960.4	26515	52081.2	0.115611	0.193971	0.152464
sp|Q9WU00|NRF1_MOUSE	Q9WU00	NRF1_MOUSE	Nrf1	Nuclear respiratory factor 1	28342.4	54100	38235.9	46270.7	38156.7	37953.9	26608.5	50643.3	0.115289	0.150968	0.0214728
sp|Q8BIH0|SP130_MOUSE	Q8BIH0	SP130_MOUSE	Sap130	Histone deacetylase complex subunit SAP130	32179	46453.1	24520.9	43698.3	47822.5	24815.9	38339.1	50762	0.114389	-0.0905519	0.294712
sp|O35654|DPOD2_MOUSE	O35654	DPOD2_MOUSE	Pold2	DNA polymerase delta subunit 2	27389.1	56471.4	36236.1	52507.6	33724.4	43775.9	31697.6	47533.1	0.113788	0.195442	0.0318564
sp|P19253|RL13A_MOUSE	P19253	RL13A_MOUSE	Rpl13a	60S ribosomal protein L13a	70213.3	28502.8	69042.3	37719.5	41273.8	49962.2	54223	34080.4	0.113682	0.226721	-0.0471349
sp|Q925J9|MED1_MOUSE	Q925J9	MED1_MOUSE	Med1	Mediator of RNA polymerase II transcription subunit 1	22122.8	52523.1	17809.2	48534.3	41696.7	27322.7	36630	57116.5	0.113062	-0.0570453	0.441762
sp|Q9ERG0|LIMA1_MOUSE	Q9ERG0	LIMA1_MOUSE	Lima1	LIM domain and actin-binding protein 1	20150.5	51281.4	20323	43794.7	41368.6	24717.6	30694.9	62565.7	0.11222	-0.0436264	0.496919
tr|E9QA25|E9QA25_MOUSE	E9QA25	E9QA25_MOUSE	Cecr2	Protein Cecr2	27395.5	42273.4	29982.4	43224.1	42294.6	22200.9	37105.2	59679.2	0.111316	0.182772	0.585575
sp|Q922B2|SYDC_MOUSE	Q922B2	SYDC_MOUSE	Dars	Aspartate--tRNA ligase, cytoplasmic	21602.2	57242.9	24790.6	51139.2	47495.3	25506.1	23187.9	48717.9	0.111097	0.056741	-0.0218156
sp|Q9D7G0|PRPS1_MOUSE	Q9D7G0	PRPS1_MOUSE	Prps1	Ribose-phosphate pyrophosphokinase 1	29268.1	52113.1	28660.9	47446.5	41517.5	33841.7	31872.7	49918.3	0.110914	0.0142545	0.11816
sp|P47811|MK14_MOUSE	P47811	MK14_MOUSE	Mapk14	Mitogen-activated protein kinase 14	28896.8	58449.5	32105.2	43808.3	42467.6	38442.5	32852.7	40948.7	0.110425	-0.0919641	-0.132673
sp|P46978|STT3A_MOUSE	P46978	STT3A_MOUSE	Stt3a	Dolichyl-diphosphooligosaccharide--protein glycosyltransferase subunit STT3A	40631.3	39353.8	53591.8	41090.7	28869.8	45286.4	52816.4	47924.4	0.109164	0.352531	0.442008
sp|Q8CGF7|TCRG1_MOUSE	Q8CGF7	TCRG1_MOUSE	Tcerg1	Transcription elongation regulator 1	21463.2	42080.7	21486.8	48251.6	38126	20902.5	47689.2	64514.1	0.106341	0.240539	0.92663
sp|O08759|UBE3A_MOUSE	O08759	UBE3A_MOUSE	Ube3a	Ubiquitin-protein ligase E3A	20502.4	57794.5	32264.1	58180	38637.1	34117.3	17639.2	47682.5	0.105922	0.313993	-0.155471
sp|Q9JLB0-2|MPP6_MOUSE	Q9JLB0-2	MPP6_MOUSE	Mpp6	Isoform Alpha of MAGUK p55 subfamily member 6	30466	55381.4	34194.4	47145.5	47305	32546.4	28778.1	40788.5	0.104458	0.0266453	-0.198924
sp|Q9JJA4|WDR12_MOUSE	Q9JJA4	WDR12_MOUSE	Wdr12	Ribosome biogenesis protein WDR12	33297.3	41746.6	33143.3	41513	36984	32857.7	46618.2	56195.8	0.103645	0.0961741	0.557876
sp|Q61211|EIF2D_MOUSE	Q61211	EIF2D_MOUSE	Eif2d	Eukaryotic translation initiation factor 2D	17654.7	54818.6	29083.3	53049.4	48315.3	19163.1	16063.9	49691.2	0.103024	0.283532	-0.0373217
sp|Q8BX17|GEMI5_MOUSE	Q8BX17	GEMI5_MOUSE	Gemin5	Gem-associated protein 5	10084.6	26806.9	8924.42	27211.7	23331	11021	170437	73642.4	0.102894	0.0730481	2.82888
sp|Q62383|SPT6H_MOUSE	Q62383	SPT6H_MOUSE	Supt6h	Transcription elongation factor SPT6	45823.9	32723.7	79417.2	27290.9	33323	39855.2	54361.5	52786.2	0.102154	0.544184	0.550115
sp|Q8BMC4|NOP9_MOUSE	Q8BMC4	NOP9_MOUSE	Nop9	Nucleolar protein 9	29367.9	55909.4	31883	46054.7	45329.2	34141	34301.3	44331.3	0.101746	-0.0280922	-0.0152867
sp|Q6A0A9|F120A_MOUSE	Q6A0A9	F120A_MOUSE	FAM120A	Constitutive coactivator of PPAR-gamma-like protein 1	57808.1	33941.1	44537.7	36421.9	33625.5	51877	59799.7	41607.1	0.101729	-0.0787641	0.246115
sp|Q9DAW9|CNN3_MOUSE	Q9DAW9	CNN3_MOUSE	Cnn3	Calponin-3	20533.4	60925.3	24420.5	50410.8	49136.9	26794.9	23756.2	47221	0.101364	-0.0210636	-0.0973488
sp|Q99JF5|MVD1_MOUSE	Q99JF5	MVD1_MOUSE	Mvd	Diphosphomevalonate decarboxylase	17548	58845.1	29280.2	53778.2	50852.2	20375.6	17880.8	47164.1	0.101003	0.221686	-0.131004
sp|Q91W50|CSDE1_MOUSE	Q91W50	CSDE1_MOUSE	Csde1	Cold shock domain-containing protein E1	27697.2	53628.4	32859.2	48474.3	48472.1	27404.9	26303.2	43263.5	0.100047	0.100187	-0.125265
sp|Q6P9R4|ARHGI_MOUSE	Q6P9R4	ARHGI_MOUSE	Arhgef18	Rho guanine nucleotide exchange factor 18	10488.4	64038.1	28966.3	61285.5	43104.9	26474.9	24903	41141.2	0.0990855	0.375286	-0.075237
sp|Q569Z5|DDX46_MOUSE	Q569Z5	DDX46_MOUSE	Ddx46	Probable ATP-dependent RNA helicase DDX46	41472.2	33949.7	177526	22894.7	28914.4	41518.2	56459.5	33619.4	0.0987408	1.50872	0.354946
sp|Q8K019|BCLF1_MOUSE	Q8K019	BCLF1_MOUSE	Bclaf1	Bcl-2-associated transcription factor 1	66567.3	21317.4	216694	12035	25638.1	56672.6	48099.5	24267.3	0.0945307	1.47449	-0.185753
sp|P55258|RAB8A_MOUSE	P55258	RAB8A_MOUSE	Rab8a	Ras-related protein Rab-8A	51763.2	45280.7	58528.6	46362.6	40972.8	49973.9	31781.4	30372.1	0.0936173	0.205802	-0.549185
sp|P97366|EVI5_MOUSE	P97366	EVI5_MOUSE	Evi5	Ecotropic viral integration site 5 protein	21856.3	56739.5	28078.7	54454	46713.5	26949.5	24405.6	44128	0.0935121	0.164027	-0.104128
sp|P14131|RS16_MOUSE	P14131	RS16_MOUSE	Rps16	40S ribosomal protein S16	50156.9	35578.9	50773.6	46077.6	39657.9	40733.8	43112.8	44798.7	0.0928535	0.268725	0.129007
sp|P47809|MP2K4_MOUSE	P47809	MP2K4_MOUSE	Map2k4	Dual specificity mitogen-activated protein kinase kinase 4	16177	62896.4	21874.3	54594.4	52683	21501.2	14234.9	47174.7	0.0920781	0.0437563	-0.272649
sp|Q9D0B6|PBDC1_MOUSE	Q9D0B6	PBDC1_MOUSE	Pbdc1	Protein PBDC1	10496.6	61584.1	28281.3	48658.6	44740.2	22922.5	22300.7	56166.4	0.0912509	0.18537	0.213726
sp|Q921M3|SF3B3_MOUSE	Q921M3	SF3B3_MOUSE	Sf3b3	Splicing factor 3B subunit 3	26483.6	41264.3	28360.8	38071.6	36741.7	26882.4	43829.4	68129.9	0.0906008	0.0623113	0.815328
sp|P11881|ITPR1_MOUSE	P11881	ITPR1_MOUSE	Itpr1	Inositol 1,4,5-trisphosphate receptor type 1	32597.4	49891.8	38536.3	41397.8	37262.4	40224.5	27011.4	54236.6	0.0902542	0.0448601	0.0683789
sp|P19096|FAS_MOUSE	P19096	FAS_MOUSE	Fasn	Fatty acid synthase	22095.6	58672.9	29645.3	51565	49560.5	26367.4	20685.6	43753.5	0.0891635	0.0970336	-0.236694
sp|Q8CIB5|FERM2_MOUSE	Q8CIB5	FERM2_MOUSE	Fermt2	Fermitin family homolog 2	39252.7	45239.7	39279	37531.8	34113.4	45344	33423	53082.5	0.088642	-0.0488716	0.122611
sp|P59470|RPC2_MOUSE	P59470	RPC2_MOUSE	Polr3b	DNA-directed RNA polymerase III subunit RPC2	22885.2	49914.3	23297.1	51774.1	43552.4	24919.9	31121.5	49271.4	0.0884061	0.132736	0.231546
sp|O54692|ZW10_MOUSE	O54692	ZW10_MOUSE	Zw10	Centromere/kinetochore protein zw10 homolog	25802.6	60866.1	25913.8	53072	44985.2	36583.5	25332.7	39712.4	0.0874959	-0.0464229	-0.326574
sp|P62830|RL23_MOUSE	P62830	RL23_MOUSE	Rpl23	60S ribosomal protein L23	35393.2	44533.4	30179.6	51413.7	47949.2	27284.9	35310.3	46470.8	0.0872886	0.117063	0.120381
sp|Q8BW10|NOB1_MOUSE	Q8BW10	NOB1_MOUSE	Nob1	RNA-binding protein NOB1	20828.9	57843.3	22202	55704.8	53591.1	20493.3	21604	44026.5	0.0866836	0.0725779	-0.174805
sp|Q791N7|RPA12_MOUSE	Q791N7	RPA12_MOUSE	Znrd1	DNA-directed RNA polymerase I subunit RPA12	42739.8	38612.3	48019.4	46098.5	38855.7	37770.8	35563.7	51509.1	0.0863347	0.296626	0.184379
sp|Q08122|TLE3_MOUSE	Q08122	TLE3_MOUSE	Tle3	Transducin-like enhancer protein 3	24810.6	51307.8	65703.9	42307.5	43164.9	28551.1	26769.5	51290.8	0.0859487	0.590816	0.122294
sp|Q9CZU3|SK2L2_MOUSE	Q9CZU3	SK2L2_MOUSE	Skiv2l2	Superkiller viralicidic activity 2-like 2	32285.5	37564.5	31397.9	39602.8	37183.5	28665.1	44534.4	65247.2	0.0851075	0.108679	0.737412
sp|Q08288|LYAR_MOUSE	Q08288	LYAR_MOUSE	Lyar	Cell growth-regulating nucleolar protein	22885.9	41577.2	11922.7	30152.4	42423.3	18397.7	48964.4	79669.4	0.0839022	-0.531602	1.08063
sp|A2AN08|UBR4_MOUSE	A2AN08	UBR4_MOUSE	Ubr4	E3 ubiquitin-protein ligase UBR4	27789.9	58221	34686.4	49384.5	56772.4	24391.8	31472.9	32752.7	0.0836762	0.0507644	-0.337695
sp|Q9ERF3|WDR61_MOUSE	Q9ERF3	WDR61_MOUSE	Wdr61	WD repeat-containing protein 61	43376.8	40484.6	49797.2	40685.6	33455.6	45773.7	40979	46822.4	0.081973	0.191609	0.148209
sp|Q9R0P3|ESTD_MOUSE	Q9R0P3	ESTD_MOUSE	Esd	S-formylglutathione hydrolase	42721.5	48415.7	59411.3	40539.3	41534.9	44612.8	33393.8	38490.6	0.0812253	0.2144	-0.261135
sp|P35979|RL12_MOUSE	P35979	RL12_MOUSE	Rpl12	60S ribosomal protein L12	49029	39697.4	60175.7	45387.2	34854.2	49020	46833	42613.5	0.0811361	0.331804	0.0927979
sp|Q61191|HCFC1_MOUSE	Q61191	HCFC1_MOUSE	Hcfc1	Host cell factor 1	30826.5	47192	32175.9	42706.6	41606.7	32153.3	36015.7	51366.6	0.0809789	0.0217915	0.244504
sp|Q9CQL1|MGN2_MOUSE	Q9CQL1	MGN2_MOUSE	Magohb	Protein mago nashi homolog 2	40509.7	38417	54205.4	38702	30804.9	43869.8	49492.6	47290.3	0.0798935	0.315173	0.374132
sp|O70546|KDM6A_MOUSE	O70546	KDM6A_MOUSE	Kdm6a	Lysine-specific demethylase 6A	26964.8	46899.9	59969.1	38354.8	46526.2	23372	35250.4	51562.7	0.07963	0.492285	0.312656
tr|Q80ZX0|Q80ZX0_MOUSE	Q80ZX0	Q80ZX0_MOUSE	Sec24b	Protein Sec24b	42400.3	53462.5	55472.9	46026.1	41456.9	49273.5	28898.7	36463.2	0.0793855	0.161808	-0.473138
sp|Q9JIW9|RALB_MOUSE	Q9JIW9	RALB_MOUSE	Ralb	Ras-related protein Ral-B	42460.9	38860.3	59623	40649.3	34930.3	42108.8	33111	48749	0.0780395	0.380259	0.0875666
sp|Q9Z0U1|ZO2_MOUSE	Q9Z0U1	ZO2_MOUSE	Tjp2	Tight junction protein ZO-2	19102.8	53314.6	27834.1	52113.8	44060.4	24585.5	20829.2	49415	0.077164	0.219887	0.0332057
sp|P97350|PKP1_MOUSE	P97350	PKP1_MOUSE	Pkp1	Plakophilin-1	86226.6	28099.2	73749.8	29949	35732.7	72659.9	44515.1	25171.8	0.0768847	-0.0638672	-0.637307
sp|P28653|PGS1_MOUSE	P28653	PGS1_MOUSE	Bgn	Biglycan	52094.9	44238.6	65324.4	47065.4	25993.5	65415.1	51958.4	23335.8	0.0757082	0.298109	-0.27979
sp|Q8R0X7|SGPL1_MOUSE	Q8R0X7	SGPL1_MOUSE	Sgpl1	Sphingosine-1-phosphate lyase 1	32628	59877.3	39213.7	43063.6	56796.3	31039.5	32113.1	29699.9	0.0747263	-0.0943151	-0.506899
sp|Q61753|SERA_MOUSE	Q61753	SERA_MOUSE	Phgdh	D-3-phosphoglycerate dehydrogenase	64502.3	34749.2	133996	18428.7	52244.3	42012.3	65921.9	14548.2	0.0744968	0.693427	-0.228139
sp|B1AY13|UBP24_MOUSE	B1AY13	UBP24_MOUSE	Usp24	Ubiquitin carboxyl-terminal hydrolase 24	29780.7	50926.5	38451.8	46935.3	50601.5	26062.1	34885.1	47238.8	0.0741554	0.155474	0.0992587
sp|O35841|API5_MOUSE	O35841	API5_MOUSE	Api5	Apoptosis inhibitor 5	64389.8	35125.6	52891.5	31269.6	35224.2	59310.7	61869.9	39646.4	0.0740722	-0.167694	0.102791
sp|Q99MJ9|DDX50_MOUSE	Q99MJ9	DDX50_MOUSE	Ddx50	ATP-dependent RNA helicase DDX50	54740.1	43350	51998.5	33399.8	39029.8	54198.3	55710	38012	0.0733426	-0.126558	0.00762281
sp|Q9EPU0|RENT1_MOUSE	Q9EPU0	RENT1_MOUSE	Upf1	Regulator of nonsense transcripts 1	18367.9	60331.9	21027.5	52432.3	55188.4	19619.3	20345.3	41075.9	0.0731734	-0.0262303	-0.284448
sp|P21278|GNA11_MOUSE	P21278	GNA11_MOUSE	Gna11	Guanine nucleotide-binding protein subunit alpha-11	27029.8	49336.1	35265.3	49843.1	41440	31161.2	26816.8	48983.8	0.0729355	0.229308	0.0622157
sp|Q91VC9|GHITM_MOUSE	Q91VC9	GHITM_MOUSE	Ghitm	Growth hormone-inducible transmembrane protein	35870.3	39622	23839.1	48035.5	48304.4	23602.5	30147.2	55288	0.0702004	-0.000645523	0.248702
sp|P08775|RPB1_MOUSE	P08775	RPB1_MOUSE	Polr2a	DNA-directed RNA polymerase II subunit RPB1	29522.9	39675.1	31641.5	39102	39531.4	26393.9	35615	65311	0.0698998	0.101766	0.614395
sp|Q3UFY8|MRRP1_MOUSE	Q3UFY8	MRRP1_MOUSE	Trmt10c	Mitochondrial ribonuclease P protein 1	15361.9	58047.2	21991.1	64242	49874.2	20071.3	21976.4	47616	0.0697278	0.30201	-0.00730186
sp|P41216|ACSL1_MOUSE	P41216	ACSL1_MOUSE	Acsl1	Long-chain-fatty-acid--CoA ligase 1	18247.9	61108.3	23296.8	58841.6	53657.7	21957.2	17208.8	40140.1	0.0696722	0.119386	-0.398902
sp|Q8BX22|SALL4_MOUSE	Q8BX22	SALL4_MOUSE	Sall4	Sal-like protein 4	25799.9	51290.6	28375.8	41010.6	38830.7	34720.4	37450	55840	0.0678059	-0.0840946	0.342975
sp|Q9JJY4|DDX20_MOUSE	Q9JJY4	DDX20_MOUSE	Ddx20	Probable ATP-dependent RNA helicase DDX20	18006.3	32675.9	21075.8	27678.3	25819.1	22544.2	129365	69261.3	0.0675631	0.0116078	2.03807
sp|Q3USH5|SFSWA_MOUSE	Q3USH5	SFSWA_MOUSE	Sfswap	Splicing factor, suppressor of white-apricot homolog	23446.3	30753	34702.5	27318.2	21200.1	30532.3	70544.7	89000.9	0.0672063	0.261681	1.62483
sp|O09106|HDAC1_MOUSE	O09106	HDAC1_MOUSE	Hdac1	Histone deacetylase 1	30427.8	41036.9	33025.4	42756.6	38348.4	29879.7	46072.4	55355.8	0.0668659	0.151491	0.572021
tr|G3X922|G3X922_MOUSE	G3X922	G3X922_MOUSE	Dnajc13	MCG115602	36685.8	42292.7	48593.7	41496.9	39932.2	35470.4	40801.3	51310	0.0668463	0.256762	0.288764
sp|Q8C7R4|UBA6_MOUSE	Q8C7R4	UBA6_MOUSE	Uba6	Ubiquitin-like modifier-activating enzyme 6	22360.5	60249.4	32093.7	56021	52091.2	26836.5	15784.5	37084.7	0.0657836	0.158852	-0.578105
sp|P28667|MRP_MOUSE	P28667	MRP_MOUSE	Marcksl1	MARCKS-related protein	59510.1	41688.6	60441.1	38266.8	38417.4	58358	53467.6	27734.4	0.0644774	0.0285245	-0.253126
sp|Q9D662|SC23B_MOUSE	Q9D662	SC23B_MOUSE	Sec23b	Protein transport protein Sec23B	56916	37909.6	76879.3	39201	42094.9	48615.5	44694.2	27307.4	0.0640088	0.355782	-0.33324
sp|Q04735|CDK16_MOUSE	Q04735	CDK16_MOUSE	Cdk16	Cyclin-dependent kinase 16	23879	51682.1	38574.9	59732.3	35057.9	37244	33135.6	36837.1	0.0636084	0.443263	-0.0472423
sp|Q9WUA2|SYFB_MOUSE	Q9WUA2	SYFB_MOUSE	Farsb	Phenylalanine--tRNA ligase beta subunit	20774.2	52708.9	19421.6	57889.6	51955.8	18371.4	22239.2	49487.5	0.0633301	0.136595	0.0284285
tr|E9Q7E2|E9Q7E2_MOUSE	E9Q7E2	E9Q7E2_MOUSE	Arid2	Protein Arid2	35954	45416.1	31535.8	41425.5	39647.5	38268.3	40482.7	51655.2	0.0625819	-0.0947843	0.241879
sp|Q8BKC5|IPO5_MOUSE	Q8BKC5	IPO5_MOUSE	Ipo5	Importin-5	27183.4	60847.6	34343.6	48627.3	47414.6	36884.7	24042.4	38643.5	0.0624911	-0.022914	-0.427379
sp|P16858|G3P_MOUSE	P16858	G3P_MOUSE	Gapdh	Glyceraldehyde-3-phosphate dehydrogenase	23762.8	54304.1	38372.3	54454.5	46313.6	28454.1	27324.9	41451.1	0.0622977	0.312127	-0.120509
sp|P43275|H11_MOUSE	P43275	H11_MOUSE	Hist1h1a	Histone H1.1	49698.7	21408.9	47553.3	27460.6	27185	40917.7	97390.1	39960.6	0.0622922	0.139446	1.01208
sp|Q9DCW4|ETFB_MOUSE	Q9DCW4	ETFB_MOUSE	Etfb	Electron transfer flavoprotein subunit beta	18443.6	58286	24852.3	70355.2	44829.4	28727.2	19055.3	39737.7	0.0609292	0.372221	-0.323209
sp|Q61584|FXR1_MOUSE	Q61584	FXR1_MOUSE	Fxr1	Fragile X mental retardation syndrome-related protein 1	16744.9	54915.7	16703.2	56538.1	50511.4	18193.7	25489.9	51004.7	0.0607637	0.0922411	0.154943
sp|Q61466|SMRD1_MOUSE	Q61466	SMRD1_MOUSE	Smarcd1	SWI/SNF-related matrix-associated actin-dependent regulator of chromatin subfamily D member 1	28927.2	42754.5	32233.8	49609.2	39217.5	29522.4	38050.2	54934	0.0604555	0.25171	0.435836
sp|P60762|MO4L1_MOUSE	P60762	MO4L1_MOUSE	Morf4l1	Mortality factor 4-like protein 1	34750.1	45035.2	29581.1	50664.8	47877.2	28636.6	32096	49551.5	0.0604033	0.0687068	0.0936879
sp|Q8VDP2|CX056_MOUSE	Q8VDP2	CX056_MOUSE	>sp|Q8VDP2|CX056_MOUSE	UPF0428 protein CXorf56 homolog	34843.2	39106.9	27578.1	42380	39309.6	31626	44361.4	57376.8	0.0600433	-0.0200168	0.52028
sp|Q810D6|GRWD1_MOUSE	Q810D6	GRWD1_MOUSE	Grwd1	Glutamate-rich WD repeat-containing protein 1	30259.6	41702.1	36060.2	40928.9	36575.3	32477.2	44056.7	58908.8	0.0595356	0.15696	0.576393
sp|P35821|PTN1_MOUSE	P35821	PTN1_MOUSE	Ptpn1	Tyrosine-protein phosphatase non-receptor type 1	14609.3	55398.1	32031.3	54766.5	42554.9	24652	26075.4	47891.3	0.0588996	0.36905	0.138268
sp|Q5SWU9|ACACA_MOUSE	Q5SWU9	ACACA_MOUSE	Acaca	Acetyl-CoA carboxylase 1	27281	58173.9	36635.6	48860	47119.2	34935.6	24998.8	39582.5	0.0585751	0.059262	-0.345471
sp|O55143|AT2A2_MOUSE	O55143	AT2A2_MOUSE	Atp2a2	Sarcoplasmic/endoplasmic reticulum calcium ATPase 2	25747.8	59001.2	30566.8	47539.6	48475.6	32929.7	22292.6	42864.5	0.0580746	-0.0596824	-0.3212
sp|P18653|KS6A1_MOUSE	P18653	KS6A1_MOUSE	Rps6ka1	Ribosomal protein S6 kinase alpha-1	20323.6	60150.5	26519.2	54571.8	49660.3	27719.8	20277.3	38675	0.0565628	0.0675815	-0.392413
sp|Q61699|HS105_MOUSE	Q61699	HS105_MOUSE	Hsph1	Heat shock protein 105 kDa	24261.4	59190.5	47606.4	47143.2	48868.3	31413.6	24957.5	36044.3	0.0558707	0.239045	-0.396223
sp|Q8C0D5|ETUD1_MOUSE	Q8C0D5	ETUD1_MOUSE	Eftud1	Elongation factor Tu GTP-binding domain-containing protein 1	22479.8	56963.8	31086.1	53601.2	54092.6	22340.7	27106.3	39815.3	0.0557328	0.147945	-0.191727
sp|P43006|EAA2_MOUSE	P43006	EAA2_MOUSE	Slc1a2	Excitatory amino acid transporter 2	30669	11067.7	87079.7	14163.4	6179.03	33997.3	24600.3	14100.1	0.0549705	1.33341	-0.0539967
sp|Q3TWF6|WDR70_MOUSE	Q3TWF6	WDR70_MOUSE	Wdr70	WD repeat-containing protein 70	23128.5	47021.5	33288.2	38530.7	37988.4	29582	41252.8	62400.5	0.0540511	0.08797	0.617302
sp|Q8CIL4|CA131_MOUSE	Q8CIL4	CA131_MOUSE	>sp|Q8CIL4|CA131_MOUSE	Uncharacterized protein C1orf131 homolog	27124.1	53180.3	35271.5	45086	52612.7	24747.8	35987.6	46120.7	0.0538805	0.0548358	0.0859305
sp|P62281|RS11_MOUSE	P62281	RS11_MOUSE	Rps11	40S ribosomal protein S11	47150.9	40228.3	47457.2	42189.8	41925.2	42282.4	42358.1	40677	0.0533395	0.0903058	-0.0202286
sp|Q8CFI7|RPB2_MOUSE	Q8CFI7	RPB2_MOUSE	Polr2b	DNA-directed RNA polymerase II subunit RPB2	45747.1	38412.5	52195.6	36087.6	37738.9	43384.1	38752.9	45244.7	0.053018	0.122028	0.0502365
sp|Q9Z2A0|PDPK1_MOUSE	Q9Z2A0	PDPK1_MOUSE	Pdpk1	3-phosphoinositide-dependent protein kinase 1	18767.6	56484.3	17509.9	63465.4	57945.4	14647.8	16959.8	40581.8	0.0518942	0.157645	-0.335229
sp|Q99LE6|ABCF2_MOUSE	Q99LE6	ABCF2_MOUSE	Abcf2	ATP-binding cassette sub-family F member 2	27614.2	52580.5	35354.5	47608.2	46459.4	30926.6	26234.6	40059.6	0.051435	0.100391	-0.223189
sp|Q64514|TPP2_MOUSE	Q64514	TPP2_MOUSE	Tpp2	Tripeptidyl-peptidase 2	30442.1	45616.3	29441.5	43492.5	40702.6	32695	29331.5	58825.4	0.0513754	-0.00914132	0.264342
sp|Q9R0Q7|TEBP_MOUSE	Q9R0Q7	TEBP_MOUSE	Ptges3	Prostaglandin E synthase 3	26869.2	61751.7	22440.4	59712.9	54925.3	30617	22244.1	31177.8	0.0510087	-0.0583199	-0.679208
sp|Q9Z2T6|KRT85_MOUSE	Q9Z2T6	KRT85_MOUSE	Krt85	Keratin, type II cuticular Hb5	50177.4	16110.5	334977	17619.5	20492.3	43495.7	28811.6	25671.2	0.0509469	2.46215	-0.231998
sp|Q9WVL5|MORC1_MOUSE	Q9WVL5	MORC1_MOUSE	Morc1	MORC family CW-type zinc finger protein 1	25631.2	63046.1	13055.5	50759.3	44614.8	41035	24817.2	41483.5	0.0501139	-0.42456	-0.369427
sp|Q99NA9|PCGF6_MOUSE	Q99NA9	PCGF6_MOUSE	Pcgf6	Polycomb group RING finger protein 6	25770.8	49313.4	25195.9	44888.4	48822.5	23774.4	31740.5	56857.4	0.0486012	-0.0508159	0.287365
tr|Q6P5B5|Q6P5B5_MOUSE	Q6P5B5	Q6P5B5_MOUSE	Fxr2	Fragile X mental retardation syndrome-related protein 2	18177.8	57145.5	23748	47201.5	49765.7	23143.8	30283.9	45894.7	0.0469896	-0.0393152	0.0632761
sp|Q9CZW4|ACSL3_MOUSE	Q9CZW4	ACSL3_MOUSE	Acsl3	Long-chain-fatty-acid--CoA ligase 3	32563.8	52989.9	38974.1	45813.9	44785.8	38045.9	32064.3	40470.1	0.0466473	0.0336768	-0.191517
sp|Q9EQK7|ICMT_MOUSE	Q9EQK7	ICMT_MOUSE	Icmt	Protein-S-isoprenylcysteine O-methyltransferase	42143.5	49779.5	49232.4	38212.8	43472.2	45662.6	29956.4	41543.7	0.0444384	-0.0276086	-0.318042
sp|Q9QZQ8|H2AY_MOUSE	Q9QZQ8	H2AY_MOUSE	H2afy	Core histone macro-H2A.1	61696.7	31315.2	68247.9	38176	38105.6	52087	51524.4	38492.4	0.0444061	0.238741	-0.00281449
sp|Q9D1M0|SEC13_MOUSE	Q9D1M0	SEC13_MOUSE	Sec13	Protein SEC13 homolog	21485.3	52287.3	28859.6	55038.6	38398.8	33185.4	37390	45721.8	0.0434454	0.229001	0.215413
sp|Q9ESZ8|GTF2I_MOUSE	Q9ESZ8	GTF2I_MOUSE	Gtf2i	General transcription factor II-I	31389.5	53929.4	31585.2	48795.2	39846.9	42964.8	40732	40454.3	0.0430306	-0.0429899	-0.028597
sp|Q99N94|RM09_MOUSE	Q99N94	RM09_MOUSE	Mrpl9	39S ribosomal protein L9, mitochondrial	17608.1	54094.3	30425.9	66020	47159.2	22450.3	26631.7	41104	0.0427372	0.470437	-0.0393675
sp|Q99LF4|RTCB_MOUSE	Q99LF4	RTCB_MOUSE	Rtcb	tRNA-splicing ligase RtcB homolog	42444.6	38628.7	40607.1	45014.4	41230	37479.2	46776.2	45336.1	0.0426959	0.121441	0.226863
sp|Q6ZWN5|RS9_MOUSE	Q6ZWN5	RS9_MOUSE	Rps9	40S ribosomal protein S9	46100	44469.4	51473.9	42096.7	45050.8	42952.4	33322.2	42755.1	0.0414678	0.0884982	-0.210089
sp|Q69ZN7|MYOF_MOUSE	Q69ZN7	MYOF_MOUSE	Myof	Myoferlin	27327.7	44696.3	28047.4	39667.2	44632.2	25404.3	43078	56984.9	0.0403715	-0.0486395	0.514728
sp|Q60575|KIF1B_MOUSE	Q60575	KIF1B_MOUSE	Kif1b	Kinesin-like protein KIF1B	37728.3	43822.4	44123	45150.6	49479.8	29835.4	41377.4	42648.1	0.0401002	0.170636	0.0832297
sp|Q9D787|PPIL2_MOUSE	Q9D787	PPIL2_MOUSE	Ppil2	Peptidyl-prolyl cis-trans isomerase-like 2	19805.3	55423.6	45579.1	43902	37253.5	35921.4	28742.4	52100.3	0.0399391	0.290235	0.143769
sp|Q8C092|TAF5_MOUSE	Q8C092	TAF5_MOUSE	Taf5	Transcription initiation factor TFIID subunit 5	16874.4	49907.7	39832.9	32141.7	37349	27638.9	35787.3	60702.5	0.0392916	0.14732	0.570207
sp|Q9EPK7|XPO7_MOUSE	Q9EPK7	XPO7_MOUSE	Xpo7	Exportin-7	16956.8	56016.6	28895.4	55593.3	46220.6	24827.4	26371	45515.3	0.0385779	0.249966	0.0169233
sp|P84091|AP2M1_MOUSE	P84091	AP2M1_MOUSE	Ap2m1	AP-2 complex subunit mu	47346.5	40337.3	59211.3	31686.3	36216	49217.1	47680.2	43248	0.0375158	0.0894456	0.0899322
sp|P48760|FOLC_MOUSE	P48760	FOLC_MOUSE	Fpgs	Folylpolyglutamate synthase, mitochondrial	26887.5	55229.2	24946.3	49786.6	58447.4	21565.4	26198.7	43439.7	0.0374427	-0.0984892	-0.200348
sp|Q6P9R2|OXSR1_MOUSE	Q6P9R2	OXSR1_MOUSE	Oxsr1	Serine/threonine-protein kinase OSR1	19621.2	59869.4	18287.7	57164	55882.4	21578.3	18199.6	39821.7	0.0373204	-0.0379123	-0.41688
sp|Q3U1J4|DDB1_MOUSE	Q3U1J4	DDB1_MOUSE	Ddb1	DNA damage-binding protein 1	35749.5	41713.4	39400.4	38583.5	35639.7	39853.8	40601.6	59177.3	0.0371542	0.0468223	0.402381
sp|Q3UEB3-2|PUF60_MOUSE	Q3UEB3-2	PUF60_MOUSE	Puf60	Isoform 2 of Poly(U)-binding-splicing factor PUF60	41470.2	32198.5	37025.4	37329.6	34273.6	37583.7	54289.5	63442	0.035916	0.0492961	0.712294
tr|Q6ZWZ4|Q6ZWZ4_MOUSE	Q6ZWZ4	Q6ZWZ4_MOUSE	Rpl36	60S ribosomal protein L36	47533.2	29746	78812.5	36260.4	29144.7	46251.1	63318.2	50902.2	0.0355952	0.609992	0.599262
sp|Q9QXK3|COPG2_MOUSE	Q9QXK3	COPG2_MOUSE	Copg2	Coatomer subunit gamma-2	8344.48	58399.6	13897.5	55035.9	52315.6	12806.5	9158.05	55657.1	0.0354937	0.0820569	-0.00681698
sp|Q9WVG6|CARM1_MOUSE	Q9WVG6	CARM1_MOUSE	Carm1	Histone-arginine methyltransferase CARM1	28735.5	46832.3	37532.3	39182.4	37877.7	35888.6	41910.6	56525.5	0.0348108	0.0565402	0.416225
sp|Q9Z1B5|MD2L1_MOUSE	Q9Z1B5	MD2L1_MOUSE	Mad2l1	Mitotic spindle assembly checkpoint protein MAD2A	30259.8	48301.1	34408.3	44345.7	43255.4	33565.6	28897.6	54640.5	0.0323117	0.0358533	0.120934
sp|Q8BGQ7|SYAC_MOUSE	Q8BGQ7	SYAC_MOUSE	Aars	Alanine--tRNA ligase, cytoplasmic	17013	60106	20257.4	58089.8	56519.3	18957.5	17107.2	41350.6	0.0310524	0.0538482	-0.368638
sp|Q9R0M6|RAB9A_MOUSE	Q9R0M6	RAB9A_MOUSE	Rab9a	Ras-related protein Rab-9A	13613.2	59200.2	15606.3	55034.8	54354.2	16928.6	12230.7	53546.3	0.0306517	-0.0130456	-0.11597
sp|Q9CPP0|NPM3_MOUSE	Q9CPP0	NPM3_MOUSE	Npm3	Nucleoplasmin-3	24835.2	43299.2	24238.2	58674	52898.7	13838.1	33767.3	52274.4	0.0298995	0.313101	0.366553
sp|Q61234|SNTA1_MOUSE	Q61234	SNTA1_MOUSE	Snta1	Alpha-1-syntrophin	31963.8	48959	36060.3	43879.9	48555.8	30790.4	32778.9	45666.3	0.0283859	0.0107588	-0.0164748
sp|Q80TJ7|PHF8_MOUSE	Q80TJ7	PHF8_MOUSE	Phf8	Histone lysine demethylase PHF8	54574.7	37169.4	44928.5	34657.5	39436.8	50566.1	43507	37202.7	0.0276442	-0.177457	-0.157229
sp|Q3UKC1|TAXB1_MOUSE	Q3UKC1	TAXB1_MOUSE	Tax1bp1	Tax1-binding protein 1 homolog	20159.7	60329.4	22647.8	52002.8	57460.9	21503.9	15836.4	45324.9	0.0275851	-0.0810572	-0.36859
sp|Q9DBG6|RPN2_MOUSE	Q9DBG6	RPN2_MOUSE	Rpn2	Dolichyl-diphosphooligosaccharide--protein glycosyltransferase subunit 2	60609.4	43358.5	54820	41737.2	18741	83291.1	52648.9	39625.8	0.0271144	-0.0795666	-0.145017
sp|Q8BZR9|CQ085_MOUSE	Q8BZR9	CQ085_MOUSE	Ncbp3	Uncharacterized protein C17orf85 homolog	41659.5	43696.1	55022.2	35666.7	36829.3	46954.9	55652.4	46189	0.0268059	0.114246	0.281573
sp|Q9D824|FIP1_MOUSE	Q9D824	FIP1_MOUSE	Fip1l1	Pre-mRNA 3'-end-processing factor FIP1	37090.8	28967.9	29031.1	30231	31130.3	33753	66467.3	78839	0.0259025	-0.130737	1.16318
sp|Q8BX02|KANK2_MOUSE	Q8BX02	KANK2_MOUSE	Kank2	KN motif and ankyrin repeat domain-containing protein 2	28945.4	51460.1	37910.5	46562.6	50023.7	28964.5	25061.6	42239.6	0.0256574	0.0968539	-0.231007
sp|Q8R5K4|NOL6_MOUSE	Q8R5K4	NOL6_MOUSE	Nol6	Nucleolar protein 6	34454.3	42261.8	29272.6	50150	37236	38144.3	31835	59309.2	0.0253407	0.0753625	0.273963
sp|P60843|IF4A1_MOUSE	P60843	IF4A1_MOUSE	Eif4a1	Eukaryotic initiation factor 4A-I	20059.9	60146.5	23158.3	53855.8	51549.8	27272.1	19244.8	43096.1	0.0251204	-0.0334737	-0.338417
sp|Q80X41|VRK1_MOUSE	Q80X41	VRK1_MOUSE	Vrk1	Serine/threonine-protein kinase VRK1	35101.7	38815.2	29504.1	42834.5	40776.7	31891.9	51773.5	55755.6	0.0245722	-0.00656538	0.565323
sp|Q9D0R8|LSM12_MOUSE	Q9D0R8	LSM12_MOUSE	Lsm12	Protein LSM12 homolog	34840.1	43224.1	39623.1	40591.2	43271.1	33629.1	44434.4	44428.3	0.0216742	0.0608724	0.208591
sp|Q9Z2V5|HDAC6_MOUSE	Q9Z2V5	HDAC6_MOUSE	Hdac6	Histone deacetylase 6	23548.4	52585.1	20603.2	49660.5	48796	26203.7	18602.1	52372.3	0.0216465	-0.0941064	-0.0795867
sp|P18572|BASI_MOUSE	P18572	BASI_MOUSE	Bsg	Basigin	31204.6	51981.4	29805.3	48919.1	47378.7	34590.2	31960.8	34492.9	0.0212636	-0.0582682	-0.302729
sp|P17426|AP2A1_MOUSE	P17426	AP2A1_MOUSE	Ap2a1	AP-2 complex subunit alpha-1	30871.4	41925.3	36443	42931.3	41542.6	30235.6	27223.4	58259	0.0203287	0.145127	0.252082
sp|P21995|EMB_MOUSE	P21995	EMB_MOUSE	Emb	Embigin	28354	42865.5	45634	43983.9	46098.5	24131	26160.8	57683.8	0.0201949	0.351711	0.255641
sp|O88685|PRS6A_MOUSE	O88685	PRS6A_MOUSE	Psmc3	26S protease regulatory subunit 6A	43980	46866.9	49610.9	53210	45989.4	43598.9	29541.5	33722.7	0.0201263	0.198752	-0.50192
sp|Q9JI11|STK4_MOUSE	Q9JI11	STK4_MOUSE	Stk4	Serine/threonine-protein kinase 4	66212.9	40344.5	141538	14867.9	22729.2	82439.1	87833.8	13695.9	0.0189306	0.572599	-0.0507976
sp|P48962|ADT1_MOUSE	P48962	ADT1_MOUSE	Slc25a4	ADP/ATP translocase 1	25086.3	46118.7	31469.5	44293.9	41191	29123.8	29979.6	58851.5	0.0181511	0.107674	0.337237
sp|P46735|MYO1B_MOUSE	P46735	MYO1B_MOUSE	Myo1b	Unconventional myosin-Ib	30992.5	49513	30453.2	47749.1	43016.6	36519.1	30080.6	50442.1	0.0174839	-0.0243919	0.0177927
sp|P48725|PCNT_MOUSE	P48725	PCNT_MOUSE	Pcnt	Pericentrin	16172.6	63258.6	22971.7	51337.7	59853.7	18630.2	18618.9	36268.5	0.0173063	-0.0788547	-0.515922
sp|Q8C0T5|SI1L1_MOUSE	Q8C0T5	SI1L1_MOUSE	Sipa1l1	Signal-induced proliferation-associated 1-like protein 1	49950.7	39306.2	67386.2	37772.7	39964.4	48344.2	45014.6	34873.2	0.0154095	0.251945	-0.144579
sp|Q61024|ASNS_MOUSE	Q61024	ASNS_MOUSE	Asns	Asparagine synthetase [glutamine-hydrolyzing]	12564.5	59268.6	15956.4	55557.1	54465.6	16632.4	17707.8	48903.5	0.0148413	0.00840699	-0.0940407
sp|Q6NXI6|RPRD2_MOUSE	Q6NXI6	RPRD2_MOUSE	Rprd2	Regulation of nuclear pre-mRNA domain-containing protein 2	24153.4	25218.5	15926.6	29796.8	27629.3	21247.9	68261.4	94958.6	0.0145272	-0.0962289	1.73958
sp|Q9D2E2|TOE1_MOUSE	Q9D2E2	TOE1_MOUSE	Toe1	Target of EGR1 protein 1	18104.7	22905.8	19563.6	19250.6	19632	20988.1	79418.3	114485	0.0137948	-0.0656108	2.25507
sp|Q8BP67|RL24_MOUSE	Q8BP67	RL24_MOUSE	Rpl24	60S ribosomal protein L24	41766.9	44039.7	49331.4	48384.1	42833.8	42248.6	45421	34667	0.0122272	0.199725	-0.0872756
sp|Q4U2R1|HERC2_MOUSE	Q4U2R1	HERC2_MOUSE	Herc2	E3 ubiquitin-protein ligase HERC2	42764.1	38822.9	69466.1	45118.3	34929.5	45981.5	36340.9	31148.3	0.0120039	0.502003	-0.261681
sp|Q6P5E6|GGA2_MOUSE	Q6P5E6	GGA2_MOUSE	Gga2	ADP-ribosylation factor-binding protein GGA2	22860	63314.3	18280.4	50276.5	64471.5	21036.1	19886	38225.6	0.0112048	-0.318751	-0.557227
sp|Q8R3Y8|I2BP1_MOUSE	Q8R3Y8	I2BP1_MOUSE	Irf2bp1	Interferon regulatory factor 2-binding protein 1	47336.6	48273.2	58687.2	35060.4	31336.3	63575.7	46587.6	34632.2	0.0105692	-0.017808	-0.22476
tr|E9Q4K7|E9Q4K7_MOUSE	E9Q4K7	E9Q4K7_MOUSE	Kif13b	Protein Kif13b	17078.2	59053.4	23001.9	54804	52877.1	22755	15094.5	45556.8	0.00949708	0.0408821	-0.318461
sp|Q9QXB9|DRG2_MOUSE	Q9QXB9	DRG2_MOUSE	Drg2	Developmentally-regulated GTP-binding protein 2	19916.5	64747.1	37715.1	53481.5	54893.7	29216.6	15002.1	37269.7	0.00945889	0.116695	-0.68625
sp|Q9WV55|VAPA_MOUSE	Q9WV55	VAPA_MOUSE	Vapa	Vesicle-associated membrane protein-associated protein A	64427.9	35547.4	65928.6	37368.1	33874.2	65451.7	53494.8	31330.7	0.00940202	0.0565524	-0.227674
sp|P52479|UBP10_MOUSE	P52479	UBP10_MOUSE	Usp10	Ubiquitin carboxyl-terminal hydrolase 10	19964.4	54324.3	25561.3	52224.9	48783.4	25036.1	24878.8	45736.8	0.00914043	0.0755114	-0.0640149
sp|P37040|NCPR_MOUSE	P37040	NCPR_MOUSE	Por	NADPH--cytochrome P450 reductase	37197.6	49900.6	53045.8	47998.4	46731.2	39837.8	31188.1	32654.6	0.00879134	0.223064	-0.439327
sp|Q9D8E6|RL4_MOUSE	Q9D8E6	RL4_MOUSE	Rpl4	60S ribosomal protein L4	27592.9	43092.9	25556	46087.7	44273.2	26020.5	43344.9	53818.2	0.00802666	0.0274448	0.467014
sp|Q80ZK9|WDTC1_MOUSE	Q80ZK9	WDTC1_MOUSE	Wdtc1	WD and tetratricopeptide repeats protein 1	12224.2	54063.3	17168.2	58316.5	52207.6	13720.3	15218.3	56550.8	0.00784765	0.195297	0.122473
sp|O70311|NMT2_MOUSE	O70311	NMT2_MOUSE	Nmt2	Glycylpeptide N-tetradecanoyltransferase 2	9141.73	60736.9	12204.7	60543.4	58971.3	10536.6	14152.5	47903.4	0.00767442	0.0657311	-0.163609
sp|Q9D5T0|ATAD1_MOUSE	Q9D5T0	ATAD1_MOUSE	Atad1	ATPase family AAA domain-containing protein 1	17857.7	52041.3	16153.9	63429.3	51289.3	18254.3	23191.7	50293.8	0.00735316	0.194548	0.0795412
sp|Q9D0S9|HINT2_MOUSE	Q9D0S9	HINT2_MOUSE	Hint2	Histidine triad nucleotide-binding protein 2, mitochondrial	44714.5	41240.9	42188	56673.1	47583.2	37935.4	38696.5	39662.6	0.0073513	0.209165	-0.126137
sp|P48410|ABCD1_MOUSE	P48410	ABCD1_MOUSE	Abcd1	ATP-binding cassette sub-family D member 1	30814.6	58270.4	22078.8	44093.8	58580.6	30069.7	22341.2	43315.5	0.00705612	-0.421893	-0.433185
sp|Q99K85|SERC_MOUSE	Q99K85	SERC_MOUSE	Psat1	Phosphoserine aminotransferase	17320.1	58961.8	22472	60525.8	51793.2	24153.2	16669.4	41777.9	0.00635849	0.128092	-0.377847
sp|Q99LI7|CSTF3_MOUSE	Q99LI7	CSTF3_MOUSE	Cstf3	Cleavage stimulation factor subunit 3	34437	33366.2	32780.1	40844.1	38156.3	29402.9	38460.8	70496.7	0.00520153	0.124028	0.68954
sp|P28658|ATX10_MOUSE	P28658	ATX10_MOUSE	Atxn10	Ataxin-10	23127.7	58783.2	45418.2	51615.2	46691.3	34942.8	17384.8	43380	0.00488226	0.249308	-0.425937
sp|Q8BRG8|TM209_MOUSE	Q8BRG8	TM209_MOUSE	Tmem209	Transmembrane protein 209	27930.8	50193.7	29607.2	40758.8	49068.5	28907.2	32323.1	55699.5	0.00274959	-0.148146	0.17485
sp|Q8K013|GTPBA_MOUSE	Q8K013	GTPBA_MOUSE	Gtpbp10	GTP-binding protein 10	26734.9	50777.9	37077.9	52152.6	49460.6	27911.5	28273.7	41359.9	0.00262202	0.205726	-0.152029
sp|Q9CT10|RANB3_MOUSE	Q9CT10	RANB3_MOUSE	Ranbp3	Ran-binding protein 3	23751.6	55641.7	29255.5	46783.4	48606.8	30658.1	25196.5	51605	0.0023344	-0.059945	-0.0455477
sp|Q9JLN9|MTOR_MOUSE	Q9JLN9	MTOR_MOUSE	Mtor	Serine/threonine-protein kinase mTOR	29862.9	50763.4	26414.7	46889.8	50856.8	29663.8	44892.1	39258.8	0.00189269	-0.135457	0.0636214
sp|P28474|ADHX_MOUSE	P28474	ADHX_MOUSE	Adh5	Alcohol dehydrogenase class-3	27297.4	54196.8	38688.4	46993.2	47342.3	34050.4	25436	41363.9	0.00179877	0.0740873	-0.285053
sp|Q3UMU9|HDGR2_MOUSE	Q3UMU9	HDGR2_MOUSE	Hdgfrp2	Hepatoma-derived growth factor-related protein 2	54376.4	42675.1	52684.9	38886.4	31902.5	65047	60190.7	35703	0.00151815	-0.0823375	-0.0157967
sp|Q91VC3|IF4A3_MOUSE	Q91VC3	IF4A3_MOUSE	Eif4a3	Eukaryotic initiation factor 4A-III	44086.3	41871.6	39950.3	41635.6	39971	45908	39897.6	47463.4	0.00132503	-0.0739852	0.0246846
tr|Q80ZM5|Q80ZM5_MOUSE	Q80ZM5	Q80ZM5_MOUSE	H1fx	H1 histone family, member X	61639.8	33983.2	68690.6	33681.2	34258.7	61313.1	54875.5	34456.9	0.000772754	0.0991618	-0.0974019
sp|Q00422|GABPA_MOUSE	Q00422	GABPA_MOUSE	Gabpa	GA-binding protein alpha chain	23083.7	53101.5	50183.8	41526	41604.9	34565.6	60712.2	36085.4	0.00027987	0.267845	0.345742
sp|O70325|GPX41_MOUSE	O70325	GPX41_MOUSE	Gpx4	Phospholipid hydroperoxide glutathione peroxidase, mitochondrial	39182.1	36759.8	32987.8	44267.5	39551.2	36400.5	37400.6	53632.9	-0.000185605	0.0245508	0.261315
sp|Q9WU56|TRUA_MOUSE	Q9WU56	TRUA_MOUSE	Pus1	tRNA pseudouridine synthase A, mitochondrial	20638.2	61578.4	18759.3	51900.7	60227.6	22019.1	22784.7	41102.9	-0.000527831	-0.219065	-0.364421
sp|Q8VE80|THOC3_MOUSE	Q8VE80	THOC3_MOUSE	Thoc3	THO complex subunit 3	37707.4	41914.3	35447.7	41588.3	37329.3	42326	44159.6	50772.3	-0.000608007	-0.0482369	0.253122
sp|Q8BGS0|MAK16_MOUSE	Q8BGS0	MAK16_MOUSE	Mak16	Protein MAK16 homolog	42432	39001.9	38273	34587.5	37620	43857.9	52252	52443	-0.000780696	-0.161272	0.361711
sp|Q9R1T2|SAE1_MOUSE	Q9R1T2	SAE1_MOUSE	Sae1	SUMO-activating enzyme subunit 1	19257.7	55719.9	25634.1	60213.6	52278.7	22764.8	18462.4	44222.6	-0.00126759	0.194052	-0.259608
sp|Q8BX10|PGAM5_MOUSE	Q8BX10	PGAM5_MOUSE	Pgam5	Serine/threonine-protein phosphatase PGAM5, mitochondrial	28382.7	43703	29709.3	43788.7	41135.5	31019.7	31782	66002.4	-0.00138963	0.0266027	0.438501
sp|Q03145|EPHA2_MOUSE	Q03145	EPHA2_MOUSE	Epha2	Ephrin type-A receptor 2	16897.5	58263.1	22438.8	52145.6	50737.2	24499	17366.9	48628.4	-0.0014508	-0.0125539	-0.189064
sp|P58022|LOXL2_MOUSE	P58022	LOXL2_MOUSE	Loxl2	Lysyl oxidase homolog 2	38695.8	42258.8	54294.9	33588.8	34981.4	46149.5	57161.1	48218	-0.00313806	0.115344	0.377264
sp|Q6PGH2|HN1L_MOUSE	Q6PGH2	HN1L_MOUSE	Hn1l	Hematological and neurological expressed 1-like protein	62728.6	31406.1	81745.6	27479.4	35498.8	58843.2	49445.1	38170.6	-0.00317363	0.21133	-0.106712
sp|P97477|AURKA_MOUSE	P97477	AURKA_MOUSE	Aurka	Aurora kinase A	21984	49116.2	16579.4	58832.7	55507.9	15751.2	21819.5	48406.3	-0.00322175	0.081721	-0.0210719
sp|P62717|RL18A_MOUSE	P62717	RL18A_MOUSE	Rpl18a	60S ribosomal protein L18a	38718.6	41378.7	62683.5	40951	37583.3	42696.5	41150.9	37312.4	-0.00328363	0.368396	-0.033018
sp|Q9Z2L7|CRLF3_MOUSE	Q9Z2L7	CRLF3_MOUSE	Crlf3	Cytokine receptor-like factor 3	9086.81	63209.8	31175.5	43495.3	49335.8	23133.9	26442.5	47661.7	-0.00344834	0.0431674	0.0321773
sp|P32261|ANT3_MOUSE	P32261	ANT3_MOUSE	Serpinc1	Antithrombin-III	68412	33266.9	111501	31901.8	37170.1	64770.2	48692.5	20895.1	-0.00370414	0.492352	-0.550822
sp|Q99MR8|MCCA_MOUSE	Q99MR8	MCCA_MOUSE	Mccc1	Methylcrotonoyl-CoA carboxylase subunit alpha, mitochondrial	64388.4	36396.8	58883.4	40523.2	41640.5	59515.7	61615.1	29328.9	-0.00530109	-0.025171	-0.153534
sp|P23116|EIF3A_MOUSE	P23116	EIF3A_MOUSE	Eif3a	Eukaryotic translation initiation factor 3 subunit A	42653.3	46538	45775.4	49523.2	37983.8	51583.6	39043.5	32587.1	-0.00607171	0.089482	-0.322398
sp|Q9Z315|SNUT1_MOUSE	Q9Z315	SNUT1_MOUSE	Sart1	U4/U6.U5 tri-snRNP-associated protein 1	37800.4	34395.7	38558.8	33425.9	30316	42212.4	75786.3	58544.8	-0.00662376	-0.0108545	0.889176
sp|Q0P678|ZCH18_MOUSE	Q0P678	ZCH18_MOUSE	Zc3h18	Zinc finger CCCH domain-containing protein 18	69367.7	17668.2	247665	16813.7	27056.3	60387.1	43155.3	18388.2	-0.00673806	1.59673	-0.506743
sp|P22935|RABP2_MOUSE	P22935	RABP2_MOUSE	Crabp2	Cellular retinoic acid-binding protein 2	40835.6	26728.5	59930.4	66299.6	23874.7	44039.3	49110	27216.8	-0.00744929	0.894276	0.16848
sp|P62309|RUXG_MOUSE	P62309	RUXG_MOUSE	Snrpg	Small nuclear ribonucleoprotein G	7761.87	2857.39	10800.3	2370.08	3072.25	7604.18	182633	135657	-0.00774545	0.30287	4.89784
sp|Q5SSK3|TEFM_MOUSE	Q5SSK3	TEFM_MOUSE	Tefm	Transcription elongation factor, mitochondrial	33875.3	45218.5	33662.6	61571.1	50042.4	29512	27254.7	44283.9	-0.0083759	0.259531	-0.153218
sp|P46467|VPS4B_MOUSE	P46467	VPS4B_MOUSE	Vps4b	Vacuolar protein sorting-associated protein 4B	10495.1	61639.7	22077.7	57940.6	58233.8	14334.3	7165.84	48594.2	-0.00864115	0.140994	-0.380104
sp|Q6NXW6|RAD17_MOUSE	Q6NXW6	RAD17_MOUSE	Rad17	Cell cycle checkpoint protein RAD17	16524.9	68588.1	19210.3	54214	52708.8	32937	27758.5	39340.2	-0.00900169	-0.222124	-0.352097
sp|Q64737|PUR2_MOUSE	Q64737	PUR2_MOUSE	Gart	Trifunctional purine biosynthetic protein adenosine-3	13303.6	56197	20846.5	62430.5	53244.4	16725	17893.2	46280.9	-0.0096977	0.251194	-0.124731
sp|Q3TIX9|SNUT2_MOUSE	Q3TIX9	SNUT2_MOUSE	Usp39	U4/U6.U5 tri-snRNP-associated protein 2	29693.5	37963.1	26850.3	39079.5	37949.1	30219.4	50064.5	65575.6	-0.0108732	-0.048173	0.762466
sp|Q05D44|IF2P_MOUSE	Q05D44	IF2P_MOUSE	Eif5b	Eukaryotic translation initiation factor 5B	23471.2	54936.9	25827.1	55205	53244.1	25835.8	27387.9	38343	-0.0123076	0.0351837	-0.266737
sp|Q6PE54|DHX40_MOUSE	Q6PE54	DHX40_MOUSE	Dhx40	Probable ATP-dependent RNA helicase DHX40	35105.4	45979.2	48580.4	34200.6	35266.8	46513.1	44860.5	48876.1	-0.0123182	0.0175545	0.196867
sp|Q8BHJ5|TBL1R_MOUSE	Q8BHJ5	TBL1R_MOUSE	Tbl1xr1	F-box-like/WD repeat-containing protein TBL1XR1	30287.8	41738.5	32127	42786.4	40726.3	31948	39215.8	55879.3	-0.0129191	0.0437797	0.387927
sp|Q8C3X4|GUF1_MOUSE	Q8C3X4	GUF1_MOUSE	Guf1	Translation factor Guf1, mitochondrial	17073.8	60953.6	22925.2	52330.3	55021.1	23724.3	21459.7	49195.4	-0.0132154	-0.0653984	-0.156402
sp|Q05144|RAC2_MOUSE	Q05144	RAC2_MOUSE	Rac2	Ras-related C3 botulinum toxin substrate 2	83172.2	25706	123691	36738.9	36751.4	73147.5	42994	14992	-0.0134608	0.545766	-0.922399
sp|Q6NVF4|HELB_MOUSE	Q6NVF4	HELB_MOUSE	Helb	DNA helicase B	33263.1	62202.8	35362.9	43223.1	54967.6	41404.7	22464.3	35991.8	-0.013634	-0.294347	-0.721266
sp|Q8K2B3|DHSA_MOUSE	Q8K2B3	DHSA_MOUSE	Sdha	Succinate dehydrogenase [ubiquinone] flavoprotein subunit, mitochondrial	19165.6	55976.2	24890.2	60803.2	50781.5	25082.2	22789.4	40919.1	-0.0137955	0.175774	-0.251925
sp|Q9ES52|SHIP1_MOUSE	Q9ES52	SHIP1_MOUSE	Inpp5d	Phosphatidylinositol 3,4,5-trisphosphate 5-phosphatase 1	25548.5	53284.1	23461.7	40328.4	45059	34531.3	38632.6	51355.4	-0.013803	-0.319262	0.177139
sp|P36916|GNL1_MOUSE	P36916	GNL1_MOUSE	Gnl1	Guanine nucleotide-binding protein-like 1	43261.5	53563.9	60490.7	43058.9	51439.1	46360.2	40519.2	30312.7	-0.0144381	0.0824255	-0.465425
sp|Q02053|UBA1_MOUSE	Q02053	UBA1_MOUSE	Uba1	Ubiquitin-like modifier-activating enzyme 1	17697.8	55947.8	24732.3	59343.7	54613.9	19801.1	16781.5	43422	-0.0149938	0.176101	-0.305747
sp|Q3TPE9|ANKY2_MOUSE	Q3TPE9	ANKY2_MOUSE	Ankmy2	Ankyrin repeat and MYND domain-containing protein 2	19023.5	61030.8	29291.4	53667.5	49534.5	31448.5	16227.9	45328.7	-0.0166398	0.0347777	-0.395704
sp|Q9Z1F9|SAE2_MOUSE	Q9Z1F9	SAE2_MOUSE	Uba2	SUMO-activating enzyme subunit 2	19505	55532.1	31204.9	53888	43996.4	31925.6	25283.2	46171.4	-0.0169134	0.164521	-0.0874909
sp|P62702|RS4X_MOUSE	P62702	RS4X_MOUSE	Rps4x	40S ribosomal protein S4, X isoform	44929.2	41409.1	42855.8	43070.2	41143.3	46222.3	46137	42134.7	-0.0170651	-0.023971	0.014886
sp|Q9JIF0|ANM1_MOUSE	Q9JIF0	ANM1_MOUSE	Prmt1	Protein arginine N-methyltransferase 1	39682.8	38841.5	45863.5	38515.6	35820.9	43657.4	45792.4	52830	-0.0174212	0.0863245	0.311353
sp|Q6PE01|SNR40_MOUSE	Q6PE01	SNR40_MOUSE	Snrnp40	U5 small nuclear ribonucleoprotein 40 kDa protein	39131	38541.4	40039.9	40192	37520.1	41121.7	45620.1	50002.8	-0.0178949	0.0288784	0.282059
sp|Q6ZQ29|TAOK2_MOUSE	Q6ZQ29	TAOK2_MOUSE	Taok2	Serine/threonine-protein kinase TAO2	31109.7	41633.4	44569.7	52502.7	34804.9	38906.2	40290.5	45390.8	-0.0190703	0.39718	0.2171
sp|Q8BJ03|COX15_MOUSE	Q8BJ03	COX15_MOUSE	Cox15	Cytochrome c oxidase assembly protein COX15 homolog	30233.6	42728.3	31365.9	33208.8	39871.6	34078	31276.9	70477.6	-0.0193977	-0.195572	0.460479
sp|P70288|HDAC2_MOUSE	P70288	HDAC2_MOUSE	Hdac2	Histone deacetylase 2	64394	24530.8	152168	17748.9	32963.4	57224.5	46097.4	25631.1	-0.020347	0.913829	-0.330388
sp|P70398|USP9X_MOUSE	P70398	USP9X_MOUSE	Usp9x	Probable ubiquitin carboxyl-terminal hydrolase FAF-X	25650.6	57380.9	34618.7	48304.4	42579.2	41698.6	28823.4	36395.9	-0.0214944	-0.0233795	-0.369855
sp|Q569Z6|TR150_MOUSE	Q569Z6	TR150_MOUSE	Thrap3	Thyroid hormone receptor-associated protein 3	33826.1	25286.2	34620.9	19001.2	22673.6	37330.4	86270.2	82712.6	-0.0216007	-0.162232	1.49375
sp|Q07235|GDN_MOUSE	Q07235	GDN_MOUSE	Serpine2	Glia-derived nexin	36557.4	38120.8	62852.8	41383.6	39656.2	36198.5	47278.2	40852.4	-0.0225517	0.458548	0.216405
sp|P57785|LFTY2_MOUSE	P57785	LFTY2_MOUSE	Lefty2	Left-right determination factor 2	11912.3	55116.9	15164.1	58872.8	53645.3	14479	14661.6	52987.5	-0.0233789	0.120076	-0.0100981
sp|Q76MZ3|2AAA_MOUSE	Q76MZ3	2AAA_MOUSE	Ppp2r1a	Serine/threonine-protein phosphatase 2A 65 kDa regulatory subunit A alpha isoform	68296.3	36335.4	64929.5	43390.4	40397	65967.1	46610.5	25093.4	-0.0236912	0.0262879	-0.568888
sp|Q8R2K4|TAF6L_MOUSE	Q8R2K4	TAF6L_MOUSE	Taf6l	TAF6-like RNA polymerase II p300/CBP-associated factor-associated factor 65 kDa subunit 6L	28452	59314.5	39319	46665.7	43375.9	45854.7	31875.1	44948.3	-0.0238695	-0.0534602	-0.215995
sp|Q8K1C0|ANGE2_MOUSE	Q8K1C0	ANGE2_MOUSE	Angel2	Protein angel homolog 2	30325.7	51603.8	36047	51981.5	45602.9	37726.5	34218.1	45751.4	-0.0244423	0.0791461	-0.0593764
sp|Q91YQ5|RPN1_MOUSE	Q91YQ5	RPN1_MOUSE	Rpn1	Dolichyl-diphosphooligosaccharide--protein glycosyltransferase subunit 1	53388.7	34599.5	63596.2	39239	40633.9	48860.7	43668.1	42099.7	-0.024491	0.200461	-0.0613642
sp|P61222|ABCE1_MOUSE	P61222	ABCE1_MOUSE	Abce1	ATP-binding cassette sub-family E member 1	19794.7	59425	21660.6	53808.9	54797.4	25790.1	18065.6	42160.2	-0.0246963	-0.0946606	-0.420175
tr|Q6NZQ2|Q6NZQ2_MOUSE	Q6NZQ2	Q6NZQ2_MOUSE	Ddx31	DEAD/H (Asp-Glu-Ala-Asp/His) box polypeptide 31	28094.7	41456.8	22963.2	46874.2	49810.8	20948.4	35565.4	60624.7	-0.0248367	-0.0189164	0.44297
sp|Q6P9L6|KIF15_MOUSE	Q6P9L6	KIF15_MOUSE	Kif15	Kinesin-like protein KIF15	19500.2	61958.7	33614	53182.1	50740.7	32152.6	18344.7	37088.9	-0.0251822	0.0663733	-0.580497
sp|Q9JJT0|RCL1_MOUSE	Q9JJT0	RCL1_MOUSE	Rcl1	RNA 3'-terminal phosphate cyclase-like protein	26145.9	46479	32236.3	42828.3	38899.9	35011	41226.6	59368.1	-0.0253237	0.0223448	0.444695
sp|P06837|NEUM_MOUSE	P06837	NEUM_MOUSE	Gap43	Neuromodulin	40881.1	37510.2	57693.5	21058.6	26759.9	53040	88404.5	24099	-0.025694	-0.0190696	0.495511
sp|Q9WTM5|RUVB2_MOUSE	Q9WTM5	RUVB2_MOUSE	Ruvbl2	RuvB-like 2	25402	40892	25689.5	45805.9	43641.8	23845.8	28796.6	66112.7	-0.0257457	0.0832266	0.491927
sp|O54988|SLK_MOUSE	O54988	SLK_MOUSE	Slk	STE20-like serine/threonine-protein kinase	47369.8	33679.1	105750	27987	31772	50806.8	43899.5	25208.7	-0.0269783	0.695559	-0.256915
sp|Q91W43|GCSP_MOUSE	Q91W43	GCSP_MOUSE	Gldc	Glycine dehydrogenase (decarboxylating), mitochondrial	22706.3	48900.8	28839.7	50971.5	47444.1	25710.8	27450.7	54208.8	-0.0308516	0.125637	0.158668
sp|P62918|RL8_MOUSE	P62918	RL8_MOUSE	Rpl8	60S ribosomal protein L8	40357.8	38371.9	29778.8	43799.6	49928.7	30584.3	45358.2	43933	-0.0323145	-0.129938	0.149298
tr|Q3TJW2|Q3TJW2_MOUSE	Q3TJW2	Q3TJW2_MOUSE	Fbxo15	F-box only protein 15	8416.57	59171.1	3806.94	62729.4	57673.6	11478.3	11631.4	47649.8	-0.0330085	-0.0556266	-0.222195
sp|P27612|PLAP_MOUSE	P27612	PLAP_MOUSE	Plaa	Phospholipase A-2-activating protein	23766.8	55603	27705.5	46144.3	41509.8	39718.6	24886	47049.1	-0.0333933	-0.137389	-0.175287
sp|P40124|CAP1_MOUSE	P40124	CAP1_MOUSE	Cap1	Adenylyl cyclase-associated protein 1	80498.4	30841.8	61702.9	34732.1	43132.1	70819.9	41465.1	23223.6	-0.0334518	-0.240799	-0.816842
sp|P62889|RL30_MOUSE	P62889	RL30_MOUSE	Rpl30	60S ribosomal protein L30	46060	37584.5	51020.7	43583.7	38824.2	46786	43578.9	44466.4	-0.0335118	0.144123	0.0404627
sp|Q99PU8|DHX30_MOUSE	Q99PU8	DHX30_MOUSE	Dhx30	Putative ATP-dependent RNA helicase DHX30	29312.7	48191.6	34345.1	44955.3	48509.2	30840	40759	48933.7	-0.0339395	-0.000887728	0.176774
sp|P62876|RPAB5_MOUSE	P62876	RPAB5_MOUSE	Polr2l	DNA-directed RNA polymerases I, II, and III subunit RPABC5	48667.7	39668.7	61858.6	38987.1	30500.6	59939.5	45809.2	47702.7	-0.0339551	0.157114	0.0481859
sp|Q6ZQL4|WDR43_MOUSE	Q6ZQL4	WDR43_MOUSE	Wdr43	WD repeat-containing protein 43	26685.2	43284.5	30486.4	42464.3	43108.9	28584.3	36316.5	59100.2	-0.0351043	0.0250863	0.412407
sp|B2RRE7|OTUD4_MOUSE	B2RRE7	OTUD4_MOUSE	Otud4	OTU domain-containing protein 4	16493.4	50146.6	23209.6	51727.7	46357.9	21933.3	30726.9	56656.1	-0.03531	0.133987	0.355654
sp|Q9QZH3|PPIE_MOUSE	Q9QZH3	PPIE_MOUSE	Ppie	Peptidyl-prolyl cis-trans isomerase E	55750.9	37117.4	49446.4	41110.6	40026.8	55157.4	53904	35453.1	-0.0355343	-0.0718953	-0.0911389
sp|O70318|E41L2_MOUSE	O70318	E41L2_MOUSE	Epb41l2	Band 4.1-like protein 2	35844.5	49688.6	48957.7	45613.1	45928.8	41739.3	33380.2	38204.5	-0.0355677	0.109343	-0.292398
sp|Q6ZQB6|VIP2_MOUSE	Q6ZQB6	VIP2_MOUSE	Ppip5k2	Inositol hexakisphosphate and diphosphoinositol-pentakisphosphate kinase 2	22056.7	58431.5	42550.3	50331.1	45534.9	37023.5	30185.9	40154.8	-0.0366377	0.169975	-0.231056
sp|Q60596|XRCC1_MOUSE	Q60596	XRCC1_MOUSE	Xrcc1	DNA repair protein XRCC1	33469.6	47994.6	25129.7	37714.6	53633	29931.2	36741.5	50790.9	-0.0367179	-0.411104	0.0669324
sp|Q8BKT7|THOC5_MOUSE	Q8BKT7	THOC5_MOUSE	Thoc5	THO complex subunit 5 homolog	34236	34910.4	24804	36081.3	41794.8	29163.5	60635.3	61206	-0.0373179	-0.220878	0.779958
sp|Q922V4|PLRG1_MOUSE	Q922V4	PLRG1_MOUSE	Plrg1	Pleiotropic regulator 1	23703.8	42383.5	32693.7	40124	45814.2	22017.7	43923.6	55961.4	-0.0375898	0.102327	0.558305
sp|Q99PV0|PRP8_MOUSE	Q99PV0	PRP8_MOUSE	Prpf8	Pre-mRNA-processing-splicing factor 8	39757.8	35988.3	34325.5	33916.3	36276.3	41476.2	47177.5	59085.5	-0.037716	-0.188234	0.450678
sp|Q9D0L8|MCES_MOUSE	Q9D0L8	MCES_MOUSE	Rnmt	mRNA cap guanine-N7 methyltransferase	32531.7	40143.6	37064.4	43303.8	37602	37010.1	42802.3	56867.4	-0.0379448	0.107214	0.417745
sp|Q99JF8|PSIP1_MOUSE	Q99JF8	PSIP1_MOUSE	Psip1	PC4 and SFRS1-interacting protein	43125.8	37068.9	47665.2	37670.9	35909	46426.6	64672.1	45040.5	-0.0380084	0.0516387	0.414141
sp|Q9CY57|CHTOP_MOUSE	Q9CY57	CHTOP_MOUSE	Chtop	Chromatin target of PRMT1 protein	53905.2	33916.2	42046	31551.6	39886.9	50376	64631.7	49048.8	-0.0395608	-0.294474	0.332781
sp|Q8BUV3|GEPH_MOUSE	Q8BUV3	GEPH_MOUSE	Gphn	Gephyrin	56954.2	20962.6	151192	19804.4	33815.2	46272.1	52537.5	30370.2	-0.0396369	1.09432	0.0499342
sp|P97355|SPSY_MOUSE	P97355	SPSY_MOUSE	Sms	Spermine synthase	33044.1	52558.7	56667.6	54049.5	51193.9	36835.2	27196.4	36163.2	-0.0403239	0.330823	-0.47442
sp|Q8BIW1|PRUNE_MOUSE	Q8BIW1	PRUNE_MOUSE	Prune	Protein prune homolog	22940.6	55908.1	27276.3	44935.7	51364.9	29722.8	31600.4	46391.6	-0.0403979	-0.167246	-0.0561577
sp|Q922Q4|P5CR2_MOUSE	Q922Q4	P5CR2_MOUSE	Pycr2	Pyrroline-5-carboxylate reductase 2	24352.6	46741.2	33757.4	54633.1	42635	30488	26183.1	55498.2	-0.0406016	0.273566	0.15968
sp|Q9CR11|YETS4_MOUSE	Q9CR11	YETS4_MOUSE	Yeats4	YEATS domain-containing protein 4	33217.8	37189.1	38392.5	33483	45078.6	27408.1	33241.2	64637.9	-0.042001	-0.0122185	0.433283
sp|Q921H8|THIKA_MOUSE	Q921H8	THIKA_MOUSE	Acaa1a	3-ketoacyl-CoA thiolase A, peroxisomal	11575.1	61139.6	14029.3	57988.9	52206.7	22824.6	18669.8	47792.3	-0.0452452	-0.0591319	-0.174962
sp|Q61686|CBX5_MOUSE	Q61686	CBX5_MOUSE	Cbx5	Chromobox protein homolog 5	92762.7	31441.8	65114	39574.1	33504.9	94662.6	47306.3	23387.7	-0.045312	-0.291931	-0.858371
sp|P59325|IF5_MOUSE	P59325	IF5_MOUSE	Eif5	Eukaryotic translation initiation factor 5	65089.7	36715.5	66506.8	39494.8	35176.3	69900.6	56082.2	29624.8	-0.0456346	0.0126397	-0.29396
sp|Q9DCU6|RM04_MOUSE	Q9DCU6	RM04_MOUSE	Mrpl4	39S ribosomal protein L4, mitochondrial	22959.5	50803.5	38421.9	54615.1	51074	25077.1	19941.8	45163.5	-0.045968	0.28894	-0.22609
sp|Q3UHD6|SNX27_MOUSE	Q3UHD6	SNX27_MOUSE	Snx27	Sorting nexin-27	17792.7	59013.6	27714	53428.2	51229.4	28069.2	22567.9	45366.8	-0.04607	0.0331565	-0.223145
sp|O88322|NID2_MOUSE	O88322	NID2_MOUSE	Nid2	Nidogen-2	33517	44326	46409.8	36316.3	35100.1	45281.7	71953.2	37426.5	-0.0463018	0.0414729	0.444404
sp|Q99MD9|NASP_MOUSE	Q99MD9	NASP_MOUSE	Nasp	Nuclear autoantigenic sperm protein	20268.6	57606.8	22744.7	59332.9	52223.2	28253.1	15189.7	45105.3	-0.0473961	0.0284249	-0.416527
sp|Q6IFX4|K1C39_MOUSE	Q6IFX4	K1C39_MOUSE	Krt39	Keratin, type I cytoskeletal 39	23923.9	21896.7	307476	25365.4	15509.2	31864.8	17290.6	45069.1	-0.0480979	2.81267	0.396519
sp|Q9D1P4|CHRD1_MOUSE	Q9D1P4	CHRD1_MOUSE	Chordc1	Cysteine and histidine-rich domain-containing protein 1	31227.7	46044.4	34511.1	48844.9	51197	28707.8	27905	41964.5	-0.0483353	0.0610043	-0.19362
sp|Q9CQT2|RBM7_MOUSE	Q9CQT2	RBM7_MOUSE	Rbm7	RNA-binding protein 7	26809.3	40564.2	16635.3	27469.6	37672.8	32006.6	60781.4	69732.4	-0.0485506	-0.659795	0.905399
sp|Q3TXS7|PSMD1_MOUSE	Q3TXS7	PSMD1_MOUSE	Psmd1	26S proteasome non-ATPase regulatory subunit 1	33154.4	46229.7	38055.1	48639.7	42035.8	40096.5	39013.5	44155.8	-0.0490983	0.0779953	0.0180997
sp|O08810|U5S1_MOUSE	O08810	U5S1_MOUSE	Eftud2	116 kDa U5 small nuclear ribonucleoprotein component	34087.8	36487.7	38823.7	40775.1	36712.5	36352.8	48480.6	59206.2	-0.0500165	0.123562	0.559584
sp|P29268|CTGF_MOUSE	P29268	CTGF_MOUSE	Ctgf	Connective tissue growth factor	44480.6	41349.4	54656.2	37059.9	32255.3	56610.7	41108.8	46593.1	-0.0501481	0.0455438	-0.0190216
sp|P61965|WDR5_MOUSE	P61965	WDR5_MOUSE	Wdr5	WD repeat-containing protein 5	29614.1	38312.6	33762.2	44968.6	42484.8	27852.3	40070.9	56628.1	-0.0503066	0.162643	0.459216
sp|Q3THK7|GUAA_MOUSE	Q3THK7	GUAA_MOUSE	Gmps	GMP synthase [glutamine-hydrolyzing]	38792.2	45516.1	60586.9	48825.2	45037.6	42279.7	30493.3	40588.5	-0.0505929	0.325434	-0.296786
sp|P59999|ARPC4_MOUSE	P59999	ARPC4_MOUSE	Arpc4	Actin-related protein 2/3 complex subunit 4	74248.5	30408.6	86216.2	35285.9	38454.2	69990.3	41539.8	30837.5	-0.0512869	0.164025	-0.583347
sp|Q80XN0|BDH_MOUSE	Q80XN0	BDH_MOUSE	Bdh1	D-beta-hydroxybutyrate dehydrogenase, mitochondrial	25785.9	47997.7	24377.8	60421.1	52486.8	24015.4	27589.6	43663.2	-0.0521991	0.148547	-0.102553
sp|Q91V41|RAB14_MOUSE	Q91V41	RAB14_MOUSE	Rab14	Ras-related protein Rab-14	62599.5	30948.7	80241.2	32178.2	40844.4	56189.1	36727.7	42692.6	-0.0527718	0.212337	-0.288975
sp|Q9CXW4|RL11_MOUSE	Q9CXW4	RL11_MOUSE	Rpl11	60S ribosomal protein L11	42482.1	41074	43265.9	50604.5	41967.5	44722.5	37785.4	43549.3	-0.0531192	0.114806	-0.0919934
sp|P10126|EF1A1_MOUSE	P10126	EF1A1_MOUSE	Eef1a1	Elongation factor 1-alpha 1	35135.9	52389.4	39729.8	54493.4	45109.8	45749	24667.1	33429.8	-0.0539246	0.052457	-0.645164
sp|O08715|AKAP1_MOUSE	O08715	AKAP1_MOUSE	Akap1	A-kinase anchor protein 1, mitochondrial	23247.7	45726.4	27501.2	51816.3	46340.7	25297.5	38974.5	53789.1	-0.0546737	0.14691	0.37283
sp|Q9CXK9|RBM33_MOUSE	Q9CXK9	RBM33_MOUSE	Rbm33	RNA-binding protein 33	25919.5	40417.6	26032.6	43356.7	41429.6	27512.6	36268.1	62858.8	-0.0555714	0.00932662	0.52389
sp|P68040|GBLP_MOUSE	P68040	GBLP_MOUSE	Gnb2l1	Guanine nucleotide-binding protein subunit beta-2-like 1	46112.5	37975.7	65285	38030.5	37985.5	49517.2	46491.3	38695.5	-0.0574242	0.239657	-0.0386983
sp|Q8R016|BLMH_MOUSE	Q8R016	BLMH_MOUSE	Blmh	Bleomycin hydrolase	64450.2	26208.3	59749.5	48024.4	26867.2	67479.4	91992.7	16487.2	-0.0575288	0.191965	0.201385
tr|D3YWX2|D3YWX2_MOUSE	D3YWX2	D3YWX2_MOUSE	Ylpm1	YLP motif-containing protein 1	21766.6	35316.7	37858.9	50082.1	33656.3	25761.3	51189.3	59551.4	-0.0578192	0.565648	0.898224
sp|P50096|IMDH1_MOUSE	P50096	IMDH1_MOUSE	Impdh1	Inosine-5'-monophosphate dehydrogenase 1	39714.1	49931.9	55111.6	52707.6	37633	55687.5	37911.6	30871.2	-0.0579546	0.208348	-0.440147
sp|Q9ERK4|XPO2_MOUSE	Q9ERK4	XPO2_MOUSE	Cse1l	Exportin-2	34609.5	54877.3	38913.1	48686	48441.5	44732.3	30847.8	35712.9	-0.0582483	-0.0890086	-0.485253
sp|P05480|SRC_MOUSE	P05480	SRC_MOUSE	Src	Neuronal proto-oncogene tyrosine-protein kinase Src	21028.7	52774	27580.6	48007.4	49374.9	27560.7	25295.7	49627.7	-0.0599787	-0.0254935	-0.0382349
sp|Q61210|ARHG1_MOUSE	Q61210	ARHG1_MOUSE	Arhgef1	Rho guanine nucleotide exchange factor 1	53767.5	38225.2	70969.4	47957.1	41783.3	54229.7	47346.3	29197.3	-0.0617107	0.308769	-0.326949
tr|E9PZM7|E9PZM7_MOUSE	E9PZM7	E9PZM7_MOUSE	Scaf11	Protein Scaf11	45312.4	18362.4	36660.1	25753.5	20905.9	45573.4	103235	73844.4	-0.0621824	-0.0910456	1.41342
sp|Q9D4H1|EXOC2_MOUSE	Q9D4H1	EXOC2_MOUSE	Exoc2	Exocyst complex component 2	32524.1	48817.9	39010.4	45025.3	47112.8	37898.6	32337.1	43262.9	-0.0636557	-0.0166531	-0.169269
sp|P11983|TCPA_MOUSE	P11983	TCPA_MOUSE	Tcp1	T-complex protein 1 subunit alpha	35504.6	41374.7	42019.7	40628.4	37942.6	42448	41952.7	53707.4	-0.0644315	0.0399552	0.250891
sp|Q61937|NPM_MOUSE	Q61937	NPM_MOUSE	Npm1	Nucleophosmin	40774.7	35896	50682	46417.9	45279.5	34897.1	43830.2	42121.5	-0.0645079	0.276288	0.100345
sp|Q3TEA8|HP1B3_MOUSE	Q3TEA8	HP1B3_MOUSE	Hp1bp3	Heterochromatin protein 1-binding protein 3	68282.8	26126.3	43147.7	30644.3	26639.5	72105.5	80340.8	44712.3	-0.0647823	-0.420244	0.340761
sp|Q8BK64|AHSA1_MOUSE	Q8BK64	AHSA1_MOUSE	Ahsa1	Activator of 90 kDa heat shock protein ATPase homolog 1	31390.3	50589.5	37436.5	52349.4	50711.9	35154.3	28261.2	40540.5	-0.0668221	0.0643974	-0.319647
sp|Q8BMJ2|SYLC_MOUSE	Q8BMJ2	SYLC_MOUSE	Lars	Leucine--tRNA ligase, cytoplasmic	17748.5	57498.5	21990.5	56420.6	56355.8	22492.4	19348.3	41207.1	-0.0674454	-0.00802147	-0.380822
sp|P97305|NFAC3_MOUSE	P97305	NFAC3_MOUSE	Nfatc3	Nuclear factor of activated T-cells, cytoplasmic 3	67976.3	25627.2	115538	20165.7	39701	58455.5	48757.1	20302.2	-0.0685233	0.467306	-0.50725
sp|Q60631|GRB2_MOUSE	Q60631	GRB2_MOUSE	Grb2	Growth factor receptor-bound protein 2	60027.3	34369.3	62491.3	35924.1	38496.7	60504.8	40853.5	40899.9	-0.068717	-0.00856627	-0.276171
sp|Q9QYS9|QKI_MOUSE	Q9QYS9	QKI_MOUSE	Qki	Protein quaking	39650.1	39872.1	52124.6	39661.3	37015.7	46448.6	49709.7	40991	-0.0698018	0.137113	0.119955
sp|Q8BJW6|EIF2A_MOUSE	Q8BJW6	EIF2A_MOUSE	Eif2a	Eukaryotic translation initiation factor 2A	21384.1	44761.3	20856.4	48626.6	46582.9	22875.9	32339.8	61020.6	-0.0705172	0.000503014	0.426654
sp|Q3TUH1|TAM41_MOUSE	Q3TUH1	TAM41_MOUSE	Tamm41	Mitochondrial translocator assembly and maintenance protein 41 homolog	30078.1	49961.1	33681.1	46926.3	48711.8	35348	35057	47159.8	-0.0707099	-0.0605045	-0.0319845
sp|Q6PIP5|NUDC1_MOUSE	Q6PIP5	NUDC1_MOUSE	Nudcd1	NudC domain-containing protein 1	32978.2	47620.3	51928.2	49367.4	38516.2	46211.1	25794	44673.6	-0.0720736	0.257673	-0.265866
sp|P14824|ANXA6_MOUSE	P14824	ANXA6_MOUSE	Anxa6	Annexin A6	32680.1	42294.4	39298.2	43162.6	45174.9	33653.6	26894.1	57969.1	-0.0723164	0.0649909	0.106422
sp|Q91WQ5|TAF5L_MOUSE	Q91WQ5	TAF5L_MOUSE	Taf5l	TAF5-like RNA polymerase II p300/CBP-associated factor-associated factor 65 kDa subunit 5L	49347.2	38159	84118.1	31955	27809.1	64201.2	53771.4	32789	-0.0724089	0.335168	-0.088088
sp|O88874|CCNK_MOUSE	O88874	CCNK_MOUSE	Ccnk	Cyclin-K	43132.5	29567.2	32523.1	39216.4	46665.4	29792.6	40959.9	63437.5	-0.072719	-0.0918996	0.449347
tr|Q5XJF6|Q5XJF6_MOUSE	Q5XJF6	Q5XJF6_MOUSE	Rpl10a	Ribosomal protein	52137	33642.4	114060	38593.7	35668.7	54747.4	48596.3	32640.5	-0.0759488	0.755608	-0.154447
sp|P35585|AP1M1_MOUSE	P35585	AP1M1_MOUSE	Ap1m1	AP-1 complex subunit mu-1	40036.5	46942.9	43006.6	38596.1	41995.1	49689	39766.2	45113.6	-0.0759987	-0.168054	-0.11125
sp|Q99N57|RAF1_MOUSE	Q99N57	RAF1_MOUSE	Raf1	RAF proto-oncogene serine/threonine-protein kinase	23295.9	60164.3	25968.2	56801.4	55810.6	32199.9	20474.8	33378.2	-0.0765872	-0.0885742	-0.708648
sp|Q9D6K8|FUND2_MOUSE	Q9D6K8	FUND2_MOUSE	Fundc2	FUN14 domain-containing protein 2	38950	35710.9	35247.3	52619.1	46577.7	32220.8	39690.7	43494.3	-0.0778143	0.157145	0.0781563
sp|P52624|UPP1_MOUSE	P52624	UPP1_MOUSE	Upp1	Uridine phosphorylase 1	9337.92	56288.8	13698.5	66658.4	57644.7	11697.7	12773.4	48378.8	-0.0794545	0.212684	-0.181332
sp|O89053|COR1A_MOUSE	O89053	COR1A_MOUSE	Coro1a	Coronin-1A	84852.9	27290.2	94750.6	27029.1	40571.5	77949.7	51632.5	19130.9	-0.0798044	0.0391294	-0.74407
sp|Q64524|H2B2E_MOUSE	Q64524	H2B2E_MOUSE	Hist2h2be	Histone H2B type 2-E	100638	22943.5	62377.1	45075.8	34939.1	95745.6	45155.2	15027.6	-0.0806246	-0.282385	-1.11867
sp|P48377|RFX1_MOUSE	P48377	RFX1_MOUSE	Rfx1	MHC class II regulatory factor RFX1	22012	46719.4	44131.5	43015	40713.4	32061.2	29513.9	57459.9	-0.0824659	0.260007	0.257145
sp|P97447|FHL1_MOUSE	P97447	FHL1_MOUSE	Fhl1	Four and a half LIM domains protein 1	50666.8	39892.4	72461.1	35091	33977.2	61965.6	46600.4	33427.1	-0.0833132	0.16479	-0.261679
sp|O54774|AP3D1_MOUSE	O54774	AP3D1_MOUSE	Ap3d1	AP-3 complex subunit delta-1	41124.9	44563	40759.9	44234.4	43683.2	47113	44323.6	39726.8	-0.0835407	-0.0952657	-0.111378
sp|O88559|MEN1_MOUSE	O88559	MEN1_MOUSE	Men1	Menin	42289	43432.5	53042.6	36444.7	43447.4	47458.1	38082.4	45252.6	-0.0847097	-0.0226837	-0.125443
sp|Q640Q5|PAN3_MOUSE	Q640Q5	PAN3_MOUSE	Pan3	PAB-dependent poly(A)-specific ribonuclease subunit PAN3	16296.8	58899.4	25891.9	49431.2	52056.2	27708.2	21384.8	47664.4	-0.0850838	-0.0826526	-0.208121
sp|P59235|NUP43_MOUSE	P59235	NUP43_MOUSE	Nup43	Nucleoporin Nup43	42973.9	37531.5	39802.4	42693.6	39014	46493.8	49836	48109.8	-0.0869701	-0.051732	0.195928
sp|Q3UFM5|NOM1_MOUSE	Q3UFM5	NOM1_MOUSE	Nom1	Nucleolar MIF4G domain-containing protein 1	17914.8	51618.2	19197.2	55179.3	52429.9	21429.1	24250.2	56301.6	-0.0870768	0.0100726	0.125144
sp|Q8C166|CPNE1_MOUSE	Q8C166	CPNE1_MOUSE	Cpne1	Copine-1	37579.9	46433	48828.8	42057.8	41328.9	47935.8	31596.2	44053	-0.0874778	0.0259773	-0.238765
sp|Q99NB9|SF3B1_MOUSE	Q99NB9	SF3B1_MOUSE	Sf3b1	Splicing factor 3B subunit 1	58501.2	29430.4	65594.4	28350.2	35218.3	58218.3	49528.7	36948.3	-0.0876053	0.00782344	-0.11167
sp|O88738|BIRC6_MOUSE	O88738	BIRC6_MOUSE	Birc6	Baculoviral IAP repeat-containing protein 6	19883.5	59418.6	23921.9	53040.9	55838.5	28435.2	20230.9	38288	-0.0877238	-0.130922	-0.526181
sp|Q8R1B4|EIF3C_MOUSE	Q8R1B4	EIF3C_MOUSE	Eif3c	Eukaryotic translation initiation factor 3 subunit C	38283.8	49171.1	39444.2	45241	45284	47662.8	36396.3	39662.8	-0.0878656	-0.134296	-0.289284
sp|Q64475|H2B1B_MOUSE	Q64475	H2B1B_MOUSE	Hist1h2bb	Histone H2B type 1-B	77461.5	26525.5	76935.7	38130.5	34605.4	75911.8	49787.6	27771.5	-0.0878675	0.0581941	-0.510903
sp|P62984|RL40_MOUSE	P62984	RL40_MOUSE	Uba52	Ubiquitin-60S ribosomal protein L40	40099.2	48007.6	54078.7	41364.6	38064.2	55607.7	40472.1	35737.9	-0.088363	0.0270285	-0.297637
sp|Q6PB93|GALT2_MOUSE	Q6PB93	GALT2_MOUSE	Galnt2	Polypeptide N-acetylgalactosaminyltransferase 2	50939.3	42846.7	51899.9	38158.2	39862.6	59874.1	36294.1	38894.3	-0.0887516	-0.147268	-0.407615
sp|Q8VH51|RBM39_MOUSE	Q8VH51	RBM39_MOUSE	Rbm39	RNA-binding protein 39	43326.2	29617.6	121045	28958.9	31033.2	46561.4	44014.8	45041.6	-0.089171	0.950975	0.198763
sp|Q64133|AOFA_MOUSE	Q64133	AOFA_MOUSE	Maoa	Amine oxidase [flavin-containing] A	26639.6	39431.1	28077.1	42604.1	39857.8	30506.2	36007.4	64962.6	-0.0908264	0.00648905	0.521017
sp|Q9D7N6|RM30_MOUSE	Q9D7N6	RM30_MOUSE	Mrpl30	39S ribosomal protein L30, mitochondrial	30471.3	43362.1	46552.6	54495.3	57112.3	21594	29468.1	41596	-0.0922064	0.360488	-0.147358
sp|P62880|GBB2_MOUSE	P62880	GBB2_MOUSE	Gnb2	Guanine nucleotide-binding protein G(I)/G(S)/G(T) subunit beta-2	45235	42804	48242.3	37921.6	37580.9	56275.1	49239.3	36958.7	-0.0923059	-0.123366	-0.122795
sp|P13020-2|GELS_MOUSE	P13020-2	GELS_MOUSE	Gsn	Isoform 2 of Gelsolin	37244.2	37348.1	42057.9	44678.2	37436.7	42118.1	44882.8	50184.6	-0.0929223	0.124685	0.257003
sp|Q9CZR8|EFTS_MOUSE	Q9CZR8	EFTS_MOUSE	Tsfm	Elongation factor Ts, mitochondrial	20971.3	53589.4	23273.8	69122.6	56893.4	22676.2	21230.5	41202	-0.0938032	0.215619	-0.34992
sp|Q9WTP6|KAD2_MOUSE	Q9WTP6	KAD2_MOUSE	Ak2	Adenylate kinase 2, mitochondrial	76268.3	34986.8	70115.4	31422.8	33532.9	85253.3	59648	22716.7	-0.0944964	-0.226344	-0.528269
sp|Q9D3D9|ATPD_MOUSE	Q9D3D9	ATPD_MOUSE	Atp5d	ATP synthase subunit delta, mitochondrial	70480	31317.3	74860.1	35968.9	42930.7	65856.8	53327.2	22691.4	-0.0958143	0.0268226	-0.517088
sp|Q9CXT8|MPPB_MOUSE	Q9CXT8	MPPB_MOUSE	Pmpcb	Mitochondrial-processing peptidase subunit beta	27087.2	54382.4	39776.4	55180.1	45405.8	41668.7	27971.2	40904.4	-0.0959882	0.125015	-0.338257
sp|Q3TZM9|ALG11_MOUSE	Q3TZM9	ALG11_MOUSE	Alg11	GDP-Man:Man(3)GlcNAc(2)-PP-Dol alpha-1,2-mannosyltransferase	17884.4	61302.2	49880.6	53027.6	47188.7	37455.1	23253.7	39134.9	-0.0961475	0.281882	-0.440122
sp|Q9DBG3|AP2B1_MOUSE	Q9DBG3	AP2B1_MOUSE	Ap2b1	AP-2 complex subunit beta	44752.3	37214.9	54874.9	44420.4	41919.8	45798.9	36736	45753.8	-0.0978374	0.178841	-0.0886687
sp|Q91W36|UBP3_MOUSE	Q91W36	UBP3_MOUSE	Usp3	Ubiquitin carboxyl-terminal hydrolase 3	35238.7	51628.9	46501.9	30165.4	44599.8	48371.4	44338	46032.1	-0.0979669	-0.278175	-0.0409386
sp|Q8BMJ3|IF1AX_MOUSE	Q8BMJ3	IF1AX_MOUSE	Eif1ax	Eukaryotic translation initiation factor 1A, X-chromosomal	34267.7	43343.5	26194.1	50544.8	42919.7	40168.7	48681.6	47831.5	-0.0983826	-0.11469	0.216078
sp|Q9CWS4|INT11_MOUSE	Q9CWS4	INT11_MOUSE	Cpsf3l	Integrator complex subunit 11	34360.3	44601.5	18361.1	47556.7	50555.2	33984.2	30031.1	57946.6	-0.0984685	-0.358954	0.0575149
sp|P84104|SRSF3_MOUSE	P84104	SRSF3_MOUSE	Srsf3	Serine/arginine-rich splicing factor 3	50523.4	22439.2	96270.7	21061.1	28331.1	49813.2	66020.4	50785.9	-0.0989839	0.586381	0.579905
sp|Q62448|IF4G2_MOUSE	Q62448	IF4G2_MOUSE	Eif4g2	Eukaryotic translation initiation factor 4 gamma 2	28543.6	48306.9	59076.7	48296	47262.3	35046.5	25296.7	32142.5	-0.09899	0.38351	-0.51901
sp|Q91V92|ACLY_MOUSE	Q91V92	ACLY_MOUSE	Acly	ATP-citrate synthase	36756.8	45250.5	47753	52425	50354.8	37489.5	27247.6	37961.2	-0.0991975	0.189544	-0.429884
sp|Q3THE2|ML12B_MOUSE	Q3THE2	ML12B_MOUSE	Myl12b	Myosin regulatory light chain 12B	59280.7	22481.1	207107	23502.7	29804.1	57827.6	48283.3	18358	-0.100026	1.39593	-0.395036
sp|Q9D753|EXOS8_MOUSE	Q9D753	EXOS8_MOUSE	Exosc8	Exosome complex component RRP43	36934.5	38575.3	35927.9	40584.2	40171.6	40768.4	51330.2	47574.1	-0.100188	-0.0811638	0.289181
sp|P55096|ABCD3_MOUSE	P55096	ABCD3_MOUSE	Abcd3	ATP-binding cassette sub-family D member 3	22472.9	51536	28413	49842.6	50599.9	28738.8	30952.5	47655.9	-0.100326	-0.0198299	-0.0133414
sp|Q8CIE6|COPA_MOUSE	Q8CIE6	COPA_MOUSE	Copa	Coatomer subunit alpha	29642.6	52016.5	37797.1	46391	47056.2	40484.5	29935	42464.1	-0.100339	-0.0563357	-0.273981
sp|Q9CWJ9|PUR9_MOUSE	Q9CWJ9	PUR9_MOUSE	Atic	Bifunctional purine biosynthesis protein PURH	16139.7	58303.7	16727.9	63388.1	56867.8	22943.1	15748.8	36692.3	-0.100443	0.00550408	-0.605889
sp|Q9WUM4|COR1C_MOUSE	Q9WUM4	COR1C_MOUSE	Coro1c	Coronin-1C	28285	40720.4	33480.3	41713.2	41617.8	32386.5	30452.3	63940.1	-0.100899	0.0229996	0.351061
sp|O08997|ATOX1_MOUSE	O08997	ATOX1_MOUSE	Atox1	Copper transport protein ATOX1	43448.6	33998.8	66287.3	33003.6	31355.3	51734.3	76604.6	49552.3	-0.101451	0.256995	0.60248
sp|Q8BTS4|NUP54_MOUSE	Q8BTS4	NUP54_MOUSE	Nup54	Nuclear pore complex protein Nup54	46104.3	41186.4	43463.9	38347.9	48725.5	44969.6	40890.3	44391.4	-0.102145	-0.195665	-0.135737
sp|P58281|OPA1_MOUSE	P58281	OPA1_MOUSE	Opa1	Dynamin-like 120 kDa protein, mitochondrial	51965.6	39661.6	44454.6	38898.8	39176.7	59187.2	45727.6	44239.4	-0.102354	-0.23889	-0.128732
sp|Q8R1J3|ZCHC9_MOUSE	Q8R1J3	ZCHC9_MOUSE	Zcchc9	Zinc finger CCHC domain-containing protein 9	26720.1	35471	23956.2	36590.1	47960.9	18817.4	59056.5	61610	-0.102673	-0.14134	0.853574
sp|Q99KR3|LACB2_MOUSE	Q99KR3	LACB2_MOUSE	Lactb2	Beta-lactamase-like protein 2	16992.7	57425.7	30915.7	53350.2	55652.2	24317.4	20399.5	46443.9	-0.103794	0.0754964	-0.258666
sp|Q9D0D3|PAPD1_MOUSE	Q9D0D3	PAPD1_MOUSE	Mtpap	Poly(A) RNA polymerase, mitochondrial	31767.4	39567.2	53181.6	47941.6	48124.8	28591.4	38542	46203.6	-0.104929	0.39851	0.143605
sp|P62874|GBB1_MOUSE	P62874	GBB1_MOUSE	Gnb1	Guanine nucleotide-binding protein G(I)/G(S)/G(T) subunit beta-1	40671.7	40199.1	48730.9	35966.7	40123.5	46852.4	46854.9	44554.5	-0.104998	-0.0382945	0.0717262
sp|Q8BWY3|ERF1_MOUSE	Q8BWY3	ERF1_MOUSE	Etf1	Eukaryotic peptide chain release factor subunit 1	43194.1	41984.3	48515	43777.2	47575.2	44038.7	36386.6	43802.9	-0.105079	0.0106427	-0.192152
sp|Q63844|MK03_MOUSE	Q63844	MK03_MOUSE	Mapk3	Mitogen-activated protein kinase 3	47162.9	39998.9	59622	42869.8	41202.3	52601.5	46772.7	33242	-0.105952	0.12779	-0.229383
sp|P80314|TCPB_MOUSE	P80314	TCPB_MOUSE	Cct2	T-complex protein 1 subunit beta	36680	42289.3	38815.6	46213.8	37226	47764.6	35043.1	49278.6	-0.106012	0.000658493	-0.0113987
sp|O08807|PRDX4_MOUSE	O08807	PRDX4_MOUSE	Prdx4	Peroxiredoxin-4	68587.2	32337.8	71576.5	34599.3	41255.1	67433.1	56383.4	26118.3	-0.106912	-0.0337406	-0.3977
sp|Q9R0N0|GALK1_MOUSE	Q9R0N0	GALK1_MOUSE	Galk1	Galactokinase	21234.2	49580.5	21134.3	45806.6	58509.6	17752.7	21053.1	52647.4	-0.106922	-0.188082	-0.0492946
sp|Q8R3N6|THOC1_MOUSE	Q8R3N6	THOC1_MOUSE	Thoc1	THO complex subunit 1	35801.3	37345.1	43606.1	38000	35891.7	42897.6	54510.1	53710	-0.107213	0.0506786	0.457897
sp|P14148|RL7_MOUSE	P14148	RL7_MOUSE	Rpl7	60S ribosomal protein L7	18684.5	36853.2	17596.4	50764.8	43722.2	16114.9	37097.2	71269.3	-0.107573	0.192137	0.856805
sp|Q60680|IKKA_MOUSE	Q60680	IKKA_MOUSE	Chuk	Inhibitor of nuclear factor kappa-B kinase subunit alpha	16626.2	58826.7	10502.6	56106	47774.1	33560.9	14939.8	51702.4	-0.1083	-0.288167	-0.28744
sp|Q60865|CAPR1_MOUSE	Q60865	CAPR1_MOUSE	Caprin1	Caprin-1	48214.7	40999.7	44175.9	42470.9	44860.5	51444.6	52627.4	35323.1	-0.110336	-0.152466	-0.130922
sp|Q9WV32|ARC1B_MOUSE	Q9WV32	ARC1B_MOUSE	Arpc1b	Actin-related protein 2/3 complex subunit 1B	47701.1	45128.5	64569.5	40360.7	43992	56248.8	29222.3	35966.1	-0.110813	0.0659599	-0.620784
sp|P07742|RIR1_MOUSE	P07742	RIR1_MOUSE	Rrm1	Ribonucleoside-diphosphate reductase large subunit	24396.6	51885.5	25794	52297.3	51967.6	30444.2	29294	45927.7	-0.111506	-0.0776898	-0.131704
tr|Q5SWP0|Q5SWP0_MOUSE	Q5SWP0	Q5SWP0_MOUSE	Tbrg4	Protein TBRG4 (Fragment)	22269.6	57165.7	41032.3	49615.4	52917.4	32906.4	20387.5	41656.7	-0.111597	0.0788928	-0.468082
sp|Q922W5|P5CR1_MOUSE	Q922W5	P5CR1_MOUSE	Pycr1	Pyrroline-5-carboxylate reductase 1, mitochondrial	28692.4	46177.3	37937.5	51356.4	49343.2	31553.2	26162.2	51305.7	-0.111692	0.142487	-0.0624752
sp|P80318|TCPG_MOUSE	P80318	TCPG_MOUSE	Cct3	T-complex protein 1 subunit gamma	43594	38872	47034.9	47962.2	41451.4	47661	41184.7	40034	-0.111827	0.0922567	-0.133814
sp|Q60649|CLPB_MOUSE	Q60649	CLPB_MOUSE	Clpb	Caseinolytic peptidase B protein homolog	45763.5	36058.1	40906.1	45220.9	52663.4	35787.5	34820.4	45460.9	-0.112396	-0.038412	-0.139813
sp|Q3URV1|BROMI_MOUSE	Q3URV1	BROMI_MOUSE	Tbc1d32	Protein broad-minded	92145.4	27958.3	116550	29795.8	34048.7	96062.5	56744.6	16148.2	-0.115463	0.169633	-0.835897
tr|Q6PHQ9|Q6PHQ9_MOUSE	Q6PHQ9	Q6PHQ9_MOUSE	Pabpc4	MCG5546, isoform CRA_c	33873.2	46628.6	39135.1	52136.8	52716	34527.2	31845.2	38087.7	-0.116023	0.0651271	-0.319073
tr|E9Q0S6|E9Q0S6_MOUSE	E9Q0S6	E9Q0S6_MOUSE	Tns1	Protein Tns1	19393.4	52714.2	27413.5	45982.8	45203.8	32978.9	28118.3	52604.3	-0.116699	-0.0911416	0.0461232
sp|Q61941|NNTM_MOUSE	Q61941	NNTM_MOUSE	Nnt	NAD(P) transhydrogenase, mitochondrial	62681.7	36976.1	64476.3	34821.7	42215.8	65883.1	53848.5	32186.5	-0.117298	-0.122515	-0.329357
sp|Q9DB20|ATPO_MOUSE	Q9DB20	ATPO_MOUSE	Atp5o	ATP synthase subunit O, mitochondrial	84309.4	29340.1	71091.4	33719.1	40665.9	82614.5	47498.1	21849.9	-0.117352	-0.23416	-0.830018
sp|Q8BFZ9|ERLN2_MOUSE	Q8BFZ9	ERLN2_MOUSE	Erlin2	Erlin-2	65661.1	25400.2	74913.2	32266.8	28053.2	70761	61228.1	27426.2	-0.11788	0.117246	-0.156527
sp|O55125|NIPS1_MOUSE	O55125	NIPS1_MOUSE	Nipsnap1	Protein NipSnap homolog 1	58373	37495.5	79971.9	32083.8	29824.1	74221.7	61208.2	30441.7	-0.118091	0.106997	-0.183015
sp|Q8C570|RAE1L_MOUSE	Q8C570	RAE1L_MOUSE	Rae1	mRNA export factor	24542.2	41677.7	24955.3	50228.9	43708.7	28261.6	38800.2	56001.7	-0.120137	0.0630272	0.397515
sp|Q80SW1|SAHH2_MOUSE	Q80SW1	SAHH2_MOUSE	Ahcyl1	Putative adenosylhomocysteinase 2	16478.9	56214.9	37276.1	46392.6	38538.8	40509.3	25046.8	45158.8	-0.120897	0.0819589	-0.171146
sp|Q9WTI7|MYO1C_MOUSE	Q9WTI7	MYO1C_MOUSE	Myo1c	Unconventional myosin-Ic	49038.2	37172.1	61895.6	42472.8	42398.6	51385.7	40287.7	42297.1	-0.121486	0.154267	-0.183469
sp|Q78ZA7|NP1L4_MOUSE	Q78ZA7	NP1L4_MOUSE	Nap1l4	Nucleosome assembly protein 1-like 4	80556.4	29836	98222.9	38698.9	40132.8	79992.2	46444.7	19531.9	-0.121896	0.188817	-0.864511
sp|Q9DBH5|LMAN2_MOUSE	Q9DBH5	LMAN2_MOUSE	Lman2	Vesicular integral-membrane protein VIP36	65566.9	26776.5	118344	31156	36151.2	64377.6	45367.8	30596.4	-0.122529	0.57254	-0.404218
sp|Q8BJZ4|RT35_MOUSE	Q8BJZ4	RT35_MOUSE	Mrps35	28S ribosomal protein S35, mitochondrial	28128.2	46549	33744.5	64393	53046.9	28291.1	25052.3	41897	-0.123263	0.270874	-0.280861
sp|Q9D2R8|RT33_MOUSE	Q9D2R8	RT33_MOUSE	Mrps33	28S ribosomal protein S33, mitochondrial	23329.1	49540.7	16828.7	61165.8	46847.8	32522.7	23783.5	51840.9	-0.123282	-0.0252299	-0.0697505
sp|P42225|STAT1_MOUSE	P42225	STAT1_MOUSE	Stat1	Signal transducer and activator of transcription 1	69265.2	35007.5	64324.2	46995.5	46507	67071.3	29596.9	23134.9	-0.123325	-0.0289775	-1.10694
sp|Q91WT8|RBM47_MOUSE	Q91WT8	RBM47_MOUSE	Rbm47	RNA-binding protein 47	48696.7	41003.6	103855	42833.3	40025.3	57684.9	30100.7	34266.5	-0.123396	0.586174	-0.602183
sp|P10852|4F2_MOUSE	P10852	4F2_MOUSE	Slc3a2	4F2 cell-surface antigen heavy chain	18222.4	61447.9	25673.5	43351	49401.7	37395	24888.4	44388.2	-0.1236	-0.330533	-0.325272
sp|P97822|AN32E_MOUSE	P97822	AN32E_MOUSE	Anp32e	Acidic leucine-rich nuclear phosphoprotein 32 family member E	31119.3	51953.2	39786.9	64101.1	54082.3	36455.9	26212	32518.2	-0.124157	0.198431	-0.624425
sp|Q9D2D7|ZN687_MOUSE	Q9D2D7	ZN687_MOUSE	Znf687	Zinc finger protein 687	40150.2	45123	47332.5	35422.7	37437.6	55514.8	44122.8	40076.7	-0.124398	-0.167641	-0.142681
sp|P62835|RAP1A_MOUSE	P62835	RAP1A_MOUSE	Rap1a	Ras-related protein Rap-1A	61383.9	34097.3	60803.8	41302.3	39040.4	65052.7	43098.6	35999.3	-0.124587	-0.0278059	-0.396163
sp|Q62186|SSRD_MOUSE	Q62186	SSRD_MOUSE	Ssr4	Translocon-associated protein subunit delta	63026.7	34758.7	79176.8	36857.5	28815.4	77831.6	50701.7	27361.2	-0.125153	0.121707	-0.450135
sp|O88895|HDAC3_MOUSE	O88895	HDAC3_MOUSE	Hdac3	Histone deacetylase 3	28321.2	46807.8	37441.9	42541.9	46516.7	35423.5	35894.1	51702.9	-0.1252	-0.0348642	0.0963095
sp|Q99LC3|NDUAA_MOUSE	Q99LC3	NDUAA_MOUSE	Ndufa10	NADH dehydrogenase [ubiquinone] 1 alpha subcomplex subunit 10, mitochondrial	31318.7	45275.9	28528.6	57720.5	52896.8	30669.9	22830.2	48918.5	-0.125686	0.0455818	-0.219975
sp|Q78WZ7|RPA43_MOUSE	Q78WZ7	RPA43_MOUSE	Twistnb	DNA-directed RNA polymerase I subunit RPA43	19670.1	43421.1	13540.2	51654.6	42621.1	26222.7	27935.5	62922.6	-0.125888	-0.0785691	0.400288
sp|P56399|UBP5_MOUSE	P56399	UBP5_MOUSE	Usp5	Ubiquitin carboxyl-terminal hydrolase 5	27618.2	56815.4	27672.4	50703.3	50931.4	41202.5	20619.1	43330.3	-0.125914	-0.233326	-0.526801
sp|O08808|DIAP1_MOUSE	O08808	DIAP1_MOUSE	Diaph1	Protein diaphanous homolog 1	52062.5	38699.7	78260.5	42011.4	52759.3	46287.7	39225.3	31613	-0.126022	0.280114	-0.483583
sp|O35425|BOK_MOUSE	O35425	BOK_MOUSE	Bok	Bcl-2-related ovarian killer protein	68976.3	34411.1	89406.1	19346.3	25108.6	87741.4	80870.5	17532.5	-0.126346	-0.0533599	-0.197633
sp|P06151|LDHA_MOUSE	P06151	LDHA_MOUSE	Ldha	L-lactate dehydrogenase A chain	38838.3	33210.8	37948.9	40444.5	43802.6	34875.7	87816.5	38971.2	-0.126985	-0.00523368	0.688377
sp|O35643|AP1B1_MOUSE	O35643	AP1B1_MOUSE	Ap1b1	AP-1 complex subunit beta-1	42393.4	36147.9	40230.9	42639	37132.9	48655.5	42629.8	52238.5	-0.12733	-0.0499344	0.145145
sp|P49138|MAPK2_MOUSE	P49138	MAPK2_MOUSE	Mapkapk2	MAP kinase-activated protein kinase 2	58434.6	39438.1	67379.8	42722.3	40736.6	66168.5	38395.4	27424.6	-0.127353	0.0425105	-0.699733
sp|P97379|G3BP2_MOUSE	P97379	G3BP2_MOUSE	G3bp2	Ras GTPase-activating protein-binding protein 2	35317.2	43736.4	34082.4	41429.5	54558.5	31840	49174	38093.5	-0.128177	-0.194304	0.0144372
sp|Q921F4|HNRLL_MOUSE	Q921F4	HNRLL_MOUSE	Hnrnpll	Heterogeneous nuclear ribonucleoprotein L-like	54539.6	38590.6	54501	29046.3	31815.7	69998.9	50205.2	36247.2	-0.128624	-0.28528	-0.235966
sp|P62082|RS7_MOUSE	P62082	RS7_MOUSE	Rps7	40S ribosomal protein S7	57325.1	31786.1	67694.9	45879	46291.2	51142.6	44472.6	31632.6	-0.128816	0.221137	-0.356426
sp|Q8R059|GALE_MOUSE	Q8R059	GALE_MOUSE	Gale	UDP-glucose 4-epimerase	33242.6	49126.2	27191.8	48230.8	53053.1	37044.3	27935.1	40785.1	-0.129388	-0.25649	-0.390753
sp|Q9CWZ3|RBM8A_MOUSE	Q9CWZ3	RBM8A_MOUSE	Rbm8a	RNA-binding protein 8A	58606.5	30190.5	28988.5	39070.9	39432.6	57703.9	71858.1	50398.8	-0.129503	-0.513219	0.33183
tr|Q3U2G2|Q3U2G2_MOUSE	Q3U2G2	Q3U2G2_MOUSE	Hspa4	Heat shock 70 kDa protein 4	37124.6	48373.4	50957.6	48842.2	40956.3	52604.3	34678.4	35045.1	-0.130009	0.0931357	-0.424256
sp|P45376|ALDR_MOUSE	P45376	ALDR_MOUSE	Akr1b1	Aldose reductase	43123	46313.9	72803.3	48816.6	41148.6	56728.8	28293.6	33111.8	-0.130106	0.313332	-0.672611
sp|Q91X78|ERLN1_MOUSE	Q91X78	ERLN1_MOUSE	Erlin1	Erlin-1	46930.8	35588.5	54087.3	40067.4	37770.3	52543.3	59492.4	38730	-0.130212	0.06009	0.121109
sp|Q7TNC4|LC7L2_MOUSE	Q7TNC4	LC7L2_MOUSE	Luc7l2	Putative RNA-binding protein Luc7-like 2	36564.6	27068.2	31174.2	26144.8	28043.8	41599.6	85147.3	74912.3	-0.130216	-0.280972	1.20055
sp|Q3UPL0|SC31A_MOUSE	Q3UPL0	SC31A_MOUSE	Sec31a	Protein transport protein Sec31A	18724.6	55764.2	23171.4	55306.5	58281.5	23244	17702.9	43306.1	-0.130227	-0.054967	-0.418228
sp|Q9Z1Q9|SYVC_MOUSE	Q9Z1Q9	SYVC_MOUSE	Vars	Valine--tRNA ligase	19173.1	47158	28710.1	49389.8	45131.9	27519	33785.5	54935.7	-0.131296	0.104341	0.288298
sp|O70492|SNX3_MOUSE	O70492	SNX3_MOUSE	Snx3	Sorting nexin-3	61651.8	38910.7	96847.2	44400.8	30591.1	79604.3	39665.5	18859.9	-0.131972	0.358167	-0.91293
sp|P70698|PYRG1_MOUSE	P70698	PYRG1_MOUSE	Ctps1	CTP synthase 1	39293.9	46480.4	46252.2	47978.1	54356.4	39690.3	31082.7	34374.6	-0.132831	0.00281353	-0.522822
sp|Q8C0I1|ADAS_MOUSE	Q8C0I1	ADAS_MOUSE	Agps	Alkyldihydroxyacetonephosphate synthase, peroxisomal	54280.1	40017.7	45893.8	50506.8	48368.4	55031.6	39152.2	34906	-0.13294	-0.101122	-0.481506
sp|Q8CIN4|PAK2_MOUSE	Q8CIN4	PAK2_MOUSE	Pak2	Serine/threonine-protein kinase PAK 2	40488.2	51122	43353.7	49005.5	52050.5	48424.1	29975.3	33082.6	-0.13325	-0.121503	-0.672083
sp|Q99KK9|SYHM_MOUSE	Q99KK9	SYHM_MOUSE	Hars2	Probable histidine--tRNA ligase, mitochondrial	16160.9	53930.8	30196.3	61136.3	52244.2	24665	19989.9	50494.5	-0.133914	0.247974	-0.125853
sp|Q8CD92|TTC27_MOUSE	Q8CD92	TTC27_MOUSE	Ttc27	Tetratricopeptide repeat protein 27	31737.5	55179.6	43126	43740.5	52422.9	42960.5	29389.1	34860.3	-0.134098	-0.134938	-0.570056
sp|Q3ULF4|SPG7_MOUSE	Q3ULF4	SPG7_MOUSE	Spg7	Paraplegin	27804	49849.9	21213.1	56651.7	51631.6	33635.3	26150	49351	-0.134927	-0.131015	-0.175489
sp|Q99M31|HSP7E_MOUSE	Q99M31	HSP7E_MOUSE	Hspa14	Heat shock 70 kDa protein 14	18309.9	53901.7	18979.1	56328.3	53078.5	26278.3	15508.9	45159.3	-0.136123	-0.0755628	-0.387415
sp|Q8K0C4|CP51A_MOUSE	Q8K0C4	CP51A_MOUSE	Cyp51a1	Lanosterol 14-alpha demethylase	32260.3	51376	53591.3	49811.9	49481.1	42485.2	21097.3	38264.2	-0.136974	0.169104	-0.631576
sp|Q9CQB5|CISD2_MOUSE	Q9CQB5	CISD2_MOUSE	Cisd2	CDGSH iron-sulfur domain-containing protein 2	74379.3	33838.8	86085.9	42119.8	14443.1	104555	62577.9	10688.1	-0.137	0.107518	-0.699727
sp|Q9JKF7|RM39_MOUSE	Q9JKF7	RM39_MOUSE	Mrpl39	39S ribosomal protein L39, mitochondrial	41596.5	44354.7	60648.3	45758.6	44406.5	50111.1	36688	35263.8	-0.137064	0.170937	-0.393552
sp|Q61235|SNTB2_MOUSE	Q61235	SNTB2_MOUSE	Sntb2	Beta-2-syntrophin	22122.9	49883.3	38394.8	46128.6	52799.6	26392.7	35371.2	47726.8	-0.137239	0.09399	0.0694539
sp|Q8K1J6|TRNT1_MOUSE	Q8K1J6	TRNT1_MOUSE	Trnt1	CCA tRNA nucleotidyltransferase 1, mitochondrial	18994.5	53759.2	24075.3	60345.9	55312.3	24707.8	19260.5	48677.8	-0.137343	0.0772415	-0.236138
sp|Q62077|PLCG1_MOUSE	Q62077	PLCG1_MOUSE	Plcg1	1-phosphatidylinositol 4,5-bisphosphate phosphodiesterase gamma-1	47518.4	40991.1	44285.2	39706.4	36722.7	60673.6	43719.9	38276.7	-0.138036	-0.213622	-0.248304
sp|Q9QZ47|TNNT3_MOUSE	Q9QZ47	TNNT3_MOUSE	Tnnt3	Troponin T, fast skeletal muscle	17797.6	8120.59	20266.1	11208.1	12213.4	16333.3	404928	7108.68	-0.139365	0.140843	3.85137
sp|P62996|TRA2B_MOUSE	P62996	TRA2B_MOUSE	Tra2b	Transformer-2 protein homolog beta	38092.8	38009.1	35093.7	26833.6	52890.9	30943.6	42500.9	49444.4	-0.139611	-0.436967	0.133232
sp|Q9DCL9|PUR6_MOUSE	Q9DCL9	PUR6_MOUSE	Paics	Multifunctional protein ADE2	44388.8	41551.6	48791.5	48405.1	45733.2	48958.8	36575.3	35755.9	-0.139907	0.0376621	-0.388625
sp|Q9D0I9|SYRC_MOUSE	Q9D0I9	SYRC_MOUSE	Rars	Arginine--tRNA ligase, cytoplasmic	30336.8	44695.8	35443.4	50852.9	45956.2	36748.2	33769.1	46866.6	-0.140448	0.061334	-0.0365463
sp|P62334|PRS10_MOUSE	P62334	PRS10_MOUSE	Psmc6	26S protease regulatory subunit 10B	28001.1	50380.7	38850.4	50232	46088.4	40336.6	30967.6	40455	-0.140931	0.0436909	-0.275069
sp|P07724|ALBU_MOUSE	P07724	ALBU_MOUSE	Alb	Serum albumin	62520	21301.7	65304.7	28510.5	27634.1	64811.9	75155.4	28148.3	-0.141287	0.0212123	0.160211
sp|Q8VDJ3|VIGLN_MOUSE	Q8VDJ3	VIGLN_MOUSE	Hdlbp	Vigilin	32680.6	46237.2	55502.2	46374.5	45188.4	41867.7	34313.5	36879.9	-0.141593	0.226808	-0.2902
sp|P62911|RL32_MOUSE	P62911	RL32_MOUSE	Rpl32	60S ribosomal protein L32	40428.8	37871.3	41486.2	39724.6	41822.6	44558.5	48909.2	50639.9	-0.141703	-0.0890458	0.204691
sp|Q99JZ7|ERRFI_MOUSE	Q99JZ7	ERRFI_MOUSE	Errfi1	ERBB receptor feedback inhibitor 1	66610.1	20802.7	72083.3	29100.6	51811.6	44630.7	38487.4	29795.4	-0.141824	0.0692403	-0.498146
sp|Q9CQI6|COTL1_MOUSE	Q9CQI6	COTL1_MOUSE	Cotl1	Coactosin-like protein	66222	37218.6	69782	46564.7	49663	64551.8	34225.5	25391.2	-0.142945	0.0266818	-0.937959
sp|P63087-2|PP1G_MOUSE	P63087-2	PP1G_MOUSE	Ppp1cc	Isoform Gamma-2 of Serine/threonine-protein phosphatase PP1-gamma catalytic subunit	43985.6	40308.4	44323.6	31984	29723	63418	46962	46560.3	-0.143987	-0.287589	0.00589306
sp|P54103|DNJC2_MOUSE	P54103	DNJC2_MOUSE	Dnajc2	DnaJ homolog subfamily C member 2	23340.4	52633.2	29827.1	47623.4	45263.6	38692.9	29256.5	45162.5	-0.144143	-0.116368	-0.173972
sp|P52825|CPT2_MOUSE	P52825	CPT2_MOUSE	Cpt2	Carnitine O-palmitoyltransferase 2, mitochondrial	15730.7	54789.1	21767.3	63482.2	55959.1	22029.4	18807.8	49106.4	-0.145231	0.12843	-0.199548
sp|Q8VHX6|FLNC_MOUSE	Q8VHX6	FLNC_MOUSE	Flnc	Filamin-C	23841.2	40558.2	32291	40868.9	42334.4	28885.7	46539.6	57995	-0.145236	0.0387687	0.553624
sp|Q9R1J0|NSDHL_MOUSE	Q9R1J0	NSDHL_MOUSE	Nsdhl	Sterol-4-alpha-carboxylate 3-dehydrogenase, decarboxylating	17112.8	50896.3	21315.1	60706.9	57354.9	17868.1	12639.2	53039.6	-0.145448	0.124837	-0.195747
sp|Q60930|VDAC2_MOUSE	Q60930	VDAC2_MOUSE	Vdac2	Voltage-dependent anion-selective channel protein 2	34247.7	41806.5	35864.4	45949.9	40519.7	43648.1	36402.4	51651.9	-0.146242	-0.0409167	0.0651248
sp|O35344|IMA4_MOUSE	O35344	IMA4_MOUSE	Kpna3	Importin subunit alpha-4	31339.4	46089.4	31934.1	44623.9	39899.7	45884.2	50161.6	49187.6	-0.147837	-0.164154	0.2118
sp|Q04750|TOP1_MOUSE	Q04750	TOP1_MOUSE	Top1	DNA topoisomerase 1	53568.9	37733.5	44062.9	37742.3	43215.8	57941	49948.1	38316.7	-0.14787	-0.30633	-0.196684
sp|Q8BT60|CPNE3_MOUSE	Q8BT60	CPNE3_MOUSE	Cpne3	Copine-3	31414.8	47198.4	41051.7	45492.3	48529.6	38594.5	24077.1	46735.9	-0.1483	-0.00963854	-0.299057
sp|Q8BMD8|SCMC1_MOUSE	Q8BMD8	SCMC1_MOUSE	Slc25a24	Calcium-binding mitochondrial carrier protein SCaMC-1	61995.4	32547.4	71334.4	39553.5	34997.8	69813.5	60166.7	27735.4	-0.148756	0.0813056	-0.253826
sp|Q99MN1|SYK_MOUSE	Q99MN1	SYK_MOUSE	Kars	Lysine--tRNA ligase	34432.5	38936.3	41958.9	55580.3	42590.5	38821.7	39214	44271.7	-0.150079	0.260736	0.0362842
sp|P11438|LAMP1_MOUSE	P11438	LAMP1_MOUSE	Lamp1	Lysosome-associated membrane glycoprotein 1	83394.8	25672.3	108711	29709.8	35509.7	85584.1	47070.2	21436.2	-0.150909	0.192934	-0.821814
sp|Q3TBW2|RM10_MOUSE	Q3TBW2	RM10_MOUSE	Mrpl10	39S ribosomal protein L10, mitochondrial	18617.1	51614.7	35918.9	54704	53413.1	24570.2	18869	51466.9	-0.151042	0.21671	-0.148905
sp|P29341|PABP1_MOUSE	P29341	PABP1_MOUSE	Pabpc1	Polyadenylate-binding protein 1	40921.1	40874.1	51139.5	53370.3	45727.9	45120.1	34275.4	35970.1	-0.151439	0.202111	-0.37105
sp|Q99N87|RT05_MOUSE	Q99N87	RT05_MOUSE	Mrps5	28S ribosomal protein S5, mitochondrial	13898.4	56810.8	19476.4	57891.9	58272.3	20277.7	20101.2	48860.7	-0.151713	-0.0218695	-0.187812
sp|P58404|STRN4_MOUSE	P58404	STRN4_MOUSE	Strn4	Striatin-4	37288.7	38204	57622.4	38906.6	30872.3	53078.1	37050.5	50314.9	-0.1532	0.201425	0.0575245
sp|Q6P3A8|ODBB_MOUSE	Q6P3A8	ODBB_MOUSE	Bckdhb	2-oxoisovalerate dehydrogenase subunit beta, mitochondrial	19911.9	50068.8	29649.4	66083.1	57376.9	20547.3	20017.8	45250.4	-0.155114	0.296936	-0.255692
sp|O08585|CLCA_MOUSE	O08585	CLCA_MOUSE	Clta	Clathrin light chain A	76868.4	28705.6	92906.8	34728.1	38477.8	79144.9	48462.7	20436	-0.155912	0.117857	-0.771618
sp|P61514|RL37A_MOUSE	P61514	RL37A_MOUSE	Rpl37a	60S ribosomal protein L37a	37409	38300.6	27594.6	61000.2	49453.9	34898.1	49607.1	34478.8	-0.155947	0.070798	-0.00455931
sp|Q9CPR5|RM15_MOUSE	Q9CPR5	RM15_MOUSE	Mrpl15	39S ribosomal protein L15, mitochondrial	28107.3	43934.5	54074.1	51100	51640.5	28635.7	28198.8	44345.3	-0.156137	0.389737	-0.146114
sp|Q8BY87|UBP47_MOUSE	Q8BY87	UBP47_MOUSE	Usp47	Ubiquitin carboxyl-terminal hydrolase 47	15720.8	59467.1	22321	57889.3	55795.4	27989.8	13477.1	42666.7	-0.156196	-0.0629097	-0.57757
sp|Q9CQ62|DECR_MOUSE	Q9CQ62	DECR_MOUSE	Decr1	2,4-dienoyl-CoA reductase, mitochondrial	41745.2	33786.2	61923.5	47128.1	51874.2	32346.6	57262.7	40779.1	-0.157098	0.372763	0.219222
sp|Q91YP2|NEUL_MOUSE	Q91YP2	NEUL_MOUSE	Nln	Neurolysin, mitochondrial	25885.7	48322.8	22629.3	60039	50734.5	32049.2	21295.1	47253.5	-0.157762	-0.00201313	-0.272222
sp|P10630|IF4A2_MOUSE	P10630	IF4A2_MOUSE	Eif4a2	Eukaryotic initiation factor 4A-II	37556	45779.7	36777	47966.2	48457.3	44523	30788.7	40874.3	-0.15799	-0.133826	-0.375697
sp|Q9CQF0|RM11_MOUSE	Q9CQF0	RM11_MOUSE	Mrpl11	39S ribosomal protein L11, mitochondrial	27450.9	44158.7	47157.1	61209.1	42681.3	37274.1	26994	44913.8	-0.159044	0.438647	-0.153049
sp|P56480|ATPB_MOUSE	P56480	ATPB_MOUSE	Atp5b	ATP synthase subunit beta, mitochondrial	57933.1	39121.3	65881.7	45455.2	44850.1	63533.1	37171	26705.1	-0.159275	0.0387901	-0.762792
tr|Q68FG2|Q68FG2_MOUSE	Q68FG2	Q68FG2_MOUSE	Sptbn2	Protein Sptbn2	59505.1	32718.9	87386.3	34231.4	28544.1	74465.6	38927.2	27869.7	-0.159566	0.239575	-0.624925
sp|Q61103|REQU_MOUSE	Q61103	REQU_MOUSE	Dpf2	Zinc finger protein ubi-d4	44507.6	36860	36793	37474.6	47746.3	43238.8	51454.4	44832.3	-0.161176	-0.292895	0.0817063
sp|P61620|S61A1_MOUSE	P61620	S61A1_MOUSE	Sec61a1	Protein transport protein Sec61 subunit alpha isoform 1	31435.8	41228.8	32486	41963.7	46940.5	34358.4	37011	55089.4	-0.161984	-0.126971	0.179971
sp|O35382|EXOC4_MOUSE	O35382	EXOC4_MOUSE	Exoc4	Exocyst complex component 4	24846.3	45983.5	57089.9	37214.3	32508.9	46764.8	30228.9	48998	-0.162488	0.250477	-0.000854866
tr|Q9CZN7|Q9CZN7_MOUSE	Q9CZN7	Q9CZN7_MOUSE	Shmt2	Serine hydroxymethyltransferase	36295.2	42142.5	41585.3	60129.7	49237.6	38679.4	34399.5	39060.4	-0.164596	0.210318	-0.259185
sp|Q8BH95|ECHM_MOUSE	Q8BH95	ECHM_MOUSE	Echs1	Enoyl-CoA hydratase, mitochondrial	77429.3	21712.3	112514	38278.5	36801.8	74333.4	50034.9	20254.7	-0.164753	0.440253	-0.660932
sp|Q8BJU0|SGTA_MOUSE	Q8BJU0	SGTA_MOUSE	Sgta	Small glutamine-rich tetratricopeptide repeat-containing protein alpha	13150	56682.2	28860.5	61538.3	49020.4	29302.4	11744.9	37256.2	-0.165539	0.206872	-0.676619
sp|Q9JKP5|MBNL1_MOUSE	Q9JKP5	MBNL1_MOUSE	Mbnl1	Muscleblind-like protein 1	50972.2	31951.9	62520.4	35358.5	36454	56648	45427.2	47400.5	-0.167021	0.0721859	-0.0042559
sp|P42932|TCPQ_MOUSE	P42932	TCPQ_MOUSE	Cct8	T-complex protein 1 subunit theta	39739.2	43324.5	55563.2	47514	43949	49325.5	37715.5	38161.1	-0.167264	0.14417	-0.297828
sp|O88351|IKKB_MOUSE	O88351	IKKB_MOUSE	Ikbkb	Inhibitor of nuclear factor kappa-B kinase subunit beta	25415.7	50120.6	36209	46758.9	50879.7	33971.8	27538.1	38526.8	-0.167768	-0.0323847	-0.361055
sp|O08547|SC22B_MOUSE	O08547	SC22B_MOUSE	Sec22b	Vesicle-trafficking protein SEC22b	63858.7	36566.4	64798.1	39350.4	45307.5	67503.4	47848.8	26566.8	-0.167786	-0.115265	-0.600229
sp|P32233|DRG1_MOUSE	P32233	DRG1_MOUSE	Drg1	Developmentally-regulated GTP-binding protein 1	47757.3	36555	61851.7	41298.5	39018.2	55707.3	44582.1	42142.3	-0.16801	0.122922	-0.127316
sp|P10639|THIO_MOUSE	P10639	THIO_MOUSE	Txn	Thioredoxin	61035.7	18572	132009	28285.7	29894.3	59598.7	48478.7	30743.6	-0.168866	0.840883	-0.175866
sp|Q9EQU5|SET_MOUSE	Q9EQU5	SET_MOUSE	Set	Protein SET	68315.7	30560.1	78259.5	39210.2	24155.5	87017.3	69545.1	28544.3	-0.169114	0.0794846	-0.180635
sp|O88271|CFDP1_MOUSE	O88271	CFDP1_MOUSE	Cfdp1	Craniofacial development protein 1	77756.1	25293.4	127434	15346.1	37360.6	78537.4	55221.8	15762	-0.169517	0.300941	-0.707294
sp|Q6PDI5|ECM29_MOUSE	Q6PDI5	ECM29_MOUSE	Ecm29	Proteasome-associated protein ECM29 homolog	37704.9	49232.6	49811.4	50266	40372.5	57416.4	29694	33460.7	-0.169692	0.0333737	-0.630782
sp|Q60931|VDAC3_MOUSE	Q60931	VDAC3_MOUSE	Vdac3	Voltage-dependent anion-selective channel protein 3	37663.7	41033.9	37270.4	42371.1	41784	46768.3	34337.1	51590.9	-0.17021	-0.153009	-0.0434005
sp|P14869|RLA0_MOUSE	P14869	RLA0_MOUSE	Rplp0	60S acidic ribosomal protein P0	51850.6	30609.2	111687	33108.2	35213.3	57577.3	46466.7	28665.6	-0.170288	0.64196	-0.304543
sp|A2ABU4|MYOM3_MOUSE	A2ABU4	MYOM3_MOUSE	Myom3	Myomesin-3	34013.6	42880	44076.9	48335.9	41337.9	45213.8	45595.5	38039.2	-0.1707	0.0945295	-0.0494608
sp|P25444|RS2_MOUSE	P25444	RS2_MOUSE	Rps2	40S ribosomal protein S2	51767	32542.9	57503.1	37341	39142.4	55763.6	44811.8	39972.3	-0.170798	-0.000940807	-0.162707
sp|Q91YR7|PRP6_MOUSE	Q91YR7	PRP6_MOUSE	Prpf6	Pre-mRNA-processing factor 6	48288.9	39106.3	61325.8	28634.3	35403.6	62983.4	52356	37162.9	-0.170913	-0.129183	-0.136276
sp|Q61553|FSCN1_MOUSE	Q61553	FSCN1_MOUSE	Fscn1	Fascin	37745.7	45710.8	48058	43478.5	47214.4	46756.8	36260.2	37889.4	-0.171194	-0.0378717	-0.341779
sp|Q3TDN2|FAF2_MOUSE	Q3TDN2	FAF2_MOUSE	Faf2	FAS-associated factor 2	25723.1	52972.5	44952.6	50592.1	49957.3	38654.2	32517.5	40384.6	-0.171211	0.108682	-0.281533
sp|P51660|DHB4_MOUSE	P51660	DHB4_MOUSE	Hsd17b4	Peroxisomal multifunctional enzyme type 2	64943	34569.8	60346.3	40406.9	36211.5	75941.3	47212.6	31795.6	-0.172511	-0.154639	-0.505391
sp|Q9R1P0|PSA4_MOUSE	Q9R1P0	PSA4_MOUSE	Psma4	Proteasome subunit alpha type-4	51812	35199.8	63964	44697.6	36729.7	61349.9	40391.9	33689.6	-0.172742	0.147817	-0.40484
sp|Q9JHI5|IVD_MOUSE	Q9JHI5	IVD_MOUSE	Ivd	Isovaleryl-CoA dehydrogenase, mitochondrial	34531.6	44743.9	37898.3	58309.4	51145.6	38238.3	27748.4	44855.2	-0.173139	0.106138	-0.299972
sp|Q99N96|RM01_MOUSE	Q99N96	RM01_MOUSE	Mrpl1	39S ribosomal protein L1, mitochondrial	19322.7	52364.1	28200.5	63762.1	54150.1	26679.1	20733.1	43703.3	-0.173168	0.186172	-0.327001
sp|P97351|RS3A_MOUSE	P97351	RS3A_MOUSE	Rps3a	40S ribosomal protein S3a	61300.9	33402.6	85399.3	40979.6	36383.3	70428.8	39401.7	26906.5	-0.173586	0.242681	-0.687816
sp|Q6PB66|LPPRC_MOUSE	Q6PB66	LPPRC_MOUSE	Lrpprc	Leucine-rich PPR motif-containing protein, mitochondrial	16538.4	55263.6	22846.9	61466.5	56523.9	24477.1	18342.8	45587.6	-0.173918	0.0578212	-0.341438
sp|Q9D2R0|AACS_MOUSE	Q9D2R0	AACS_MOUSE	Aacs	Acetoacetyl-CoA synthetase	28246.9	56684.5	47517.2	52277.4	50259.2	45610.5	14738	34821.5	-0.174775	0.0578887	-0.951912
sp|Q8BG32|PSD11_MOUSE	Q8BG32	PSD11_MOUSE	Psmd11	26S proteasome non-ATPase regulatory subunit 11	23803.2	51226.1	32747.8	54114.3	48504.5	36291.9	22357.4	45655.1	-0.176548	0.0347236	-0.318205
sp|Q62465|VAT1_MOUSE	Q62465	VAT1_MOUSE	Vat1	Synaptic vesicle membrane protein VAT-1 homolog	60693.3	36535.7	77533.7	41285.7	44022.7	65887.9	44761.2	24040.5	-0.176872	0.112441	-0.675815
sp|P42669|PURA_MOUSE	P42669	PURA_MOUSE	Pura	Transcriptional activator protein Pur-alpha	54572.2	29943.4	81758.6	33481.8	35599	59983.4	53414	35295.4	-0.177528	0.269829	-0.107658
sp|Q9JKR6|HYOU1_MOUSE	Q9JKR6	HYOU1_MOUSE	Hyou1	Hypoxia up-regulated protein 1	56958.4	32740.7	54159.4	41408	46154	55342.1	47017.6	30430.4	-0.178258	-0.0868333	-0.390125
sp|P47758|SRPRB_MOUSE	P47758	SRPRB_MOUSE	Srprb	Signal recognition particle receptor subunit beta	58052	33288.1	62040.5	34290.2	47499.9	55868.9	45034.8	33047.5	-0.17848	-0.101733	-0.404735
sp|Q62351|TFR1_MOUSE	Q62351	TFR1_MOUSE	Tfrc	Transferrin receptor protein 1	31288.4	43362.9	57313.1	41195.2	37286.5	47277.3	39767.2	41239.8	-0.179873	0.220205	-0.0619931
sp|Q5SV80|MYO19_MOUSE	Q5SV80	MYO19_MOUSE	Myo19	Unconventional myosin-XIX	19609.1	54680.4	27815.4	58078	54466.4	29689.6	16085.3	46192.3	-0.179906	0.0294833	-0.434352
sp|Q91YY4|ATPF2_MOUSE	Q91YY4	ATPF2_MOUSE	Atpaf2	ATP synthase mitochondrial F1 complex assembly factor 2	29201.1	44858.5	36506.9	58874.2	37992.2	45914.9	22952	40376.2	-0.180103	0.184911	-0.405944
tr|B2RXC6|B2RXC6_MOUSE	B2RXC6	B2RXC6_MOUSE	Polr3a	DNA-directed RNA polymerase	19264.4	43136.5	32197.8	44240.8	48154.7	22548.9	36042.9	56885.6	-0.180217	0.112517	0.394337
sp|O88967|YMEL1_MOUSE	O88967	YMEL1_MOUSE	Yme1l1	ATP-dependent zinc metalloprotease YME1L1	42623.2	39877	61926.4	48263.4	44135.6	49389.7	34174.3	39946.4	-0.180959	0.236563	-0.335479
sp|Q8CGC7|SYEP_MOUSE	Q8CGC7	SYEP_MOUSE	Eprs	Bifunctional glutamate/proline--tRNA ligase	31947.7	45183.6	33938.5	50814.1	48594.1	38884.8	35368.1	42705.6	-0.181621	-0.0456786	-0.164101
sp|Q9Z110|P5CS_MOUSE	Q9Z110	P5CS_MOUSE	Aldh18a1	Delta-1-pyrroline-5-carboxylate synthase	14791.1	55089.6	21605.7	55771.1	58233.3	21042.9	18922.6	51533	-0.181992	-0.0349854	-0.170174
sp|Q9WTX2|PRKRA_MOUSE	Q9WTX2	PRKRA_MOUSE	Prkra	Interferon-inducible double-stranded RNA-dependent protein kinase activator A	54171.1	41544	50801.7	34784.2	44049.9	64542.9	45750.6	36587.6	-0.182112	-0.343484	-0.399296
sp|Q922E6|FAKD2_MOUSE	Q922E6	FAKD2_MOUSE	Fastkd2	FAST kinase domain-containing protein 2	29735.7	51346.1	44374.1	51845.9	53178.9	38859.3	23126	40010.9	-0.182856	0.0641044	-0.543749
sp|P26041|MOES_MOUSE	P26041	MOES_MOUSE	Msn	Moesin	61076.7	32450	76891.3	33824.1	35488.5	70824.8	41828.2	35754.3	-0.184872	0.0585334	-0.454519
sp|P47757-2|CAPZB_MOUSE	P47757-2	CAPZB_MOUSE	Capzb	Isoform 2 of F-actin-capping protein subunit beta	58864.1	31289.8	70327.7	33032	30383.7	72106.9	53961.6	38534.3	-0.185028	0.0121836	-0.14803
tr|F8VQC7|F8VQC7_MOUSE	F8VQC7	F8VQC7_MOUSE	Ktn1	Kinectin	11472	46731.5	22453.6	67996.7	51018	15177.3	25389.3	45432.6	-0.185625	0.450397	0.0974662
sp|Q9CZM2|RL15_MOUSE	Q9CZM2	RL15_MOUSE	Rpl15	60S ribosomal protein L15	37571.9	44372	40589.9	43936	40303.1	52898.9	38779.9	43333.4	-0.185725	-0.140968	-0.182746
sp|Q9Z0X1|AIFM1_MOUSE	Q9Z0X1	AIFM1_MOUSE	Aifm1	Apoptosis-inducing factor 1, mitochondrial	27312.8	46148.5	35205.2	50684.4	48214.4	35366.4	32449.3	47891.8	-0.186187	0.039313	-0.0570324
sp|Q3THS6|METK2_MOUSE	Q3THS6	METK2_MOUSE	Mat2a	S-adenosylmethionine synthase isoform type-2	32448.9	49308	57397.2	48876	46964.9	46072	31341.4	30626.3	-0.186462	0.191904	-0.586288
sp|Q9CQ75|NDUA2_MOUSE	Q9CQ75	NDUA2_MOUSE	Ndufa2	NADH dehydrogenase [ubiquinone] 1 alpha subcomplex subunit 2	22606.5	48422.2	27273.2	55886.4	44687.8	36166	21865.6	52089.9	-0.186911	0.0405689	-0.128656
sp|O88696|CLPP_MOUSE	O88696	CLPP_MOUSE	Clpp	ATP-dependent Clp protease proteolytic subunit, mitochondrial	55200	37288.1	82729.1	43554.8	38839.1	66446.6	39384.4	31735.2	-0.186969	0.262363	-0.56599
sp|Q8K1R7|NEK9_MOUSE	Q8K1R7	NEK9_MOUSE	Nek9	Serine/threonine-protein kinase Nek9	43491.2	43147.4	61553.7	40504.2	33611.7	65015.7	49209.3	34634.7	-0.186978	0.049328	-0.23428
sp|Q91VY9|ZN622_MOUSE	Q91VY9	ZN622_MOUSE	Znf622	Zinc finger protein 622	24777.9	47529.1	34339.9	48543.2	41718.7	40614.3	31308.4	59422.4	-0.187334	0.00960766	0.140121
sp|P70700|RPA2_MOUSE	P70700	RPA2_MOUSE	Polr1b	DNA-directed RNA polymerase I subunit RPA2	35252.7	38922.1	38072.8	41928.1	46070.1	38406.6	32552.8	50041.1	-0.187626	-0.0785383	-0.0325187
sp|Q9CPU0|LGUL_MOUSE	Q9CPU0	LGUL_MOUSE	Glo1	Lactoylglutathione lyase	81942.2	24564	67521.7	30679.8	43009.4	78301.5	77094.5	20225.9	-0.187771	-0.304891	-0.317895
sp|P62862|RS30_MOUSE	P62862	RS30_MOUSE	Fau	40S ribosomal protein S30	77597.3	21960	114499	39227.2	36988.8	76500.6	58807.1	17501.5	-0.188959	0.437802	-0.57264
sp|Q8BKF1|RPOM_MOUSE	Q8BKF1	RPOM_MOUSE	Polrmt	DNA-directed RNA polymerase, mitochondrial	22890.8	48183.6	25645	55303.7	61859.3	19176.7	25042.1	44601	-0.189234	-0.00155589	-0.218582
sp|Q99K01|PDXD1_MOUSE	Q99K01	PDXD1_MOUSE	Pdxdc1	Pyridoxal-dependent decarboxylase domain-containing protein 1	8736.38	58716.1	16795.2	62720.9	61934.7	15014.6	13373.2	43137.3	-0.190035	0.0473405	-0.445387
sp|Q8K3F7|TDH_MOUSE	Q8K3F7	TDH_MOUSE	Tdh	L-threonine 3-dehydrogenase, mitochondrial	27371.1	51651.3	34721	60349.9	60754.2	29496.2	22202.1	38692.3	-0.191671	0.0750712	-0.567623
sp|P31254|UBA1Y_MOUSE	P31254	UBA1Y_MOUSE	Uba1y	Ubiquitin-like modifier-activating enzyme 1 Y	20114.2	54011.2	31174.4	57869.4	56894.7	27765.3	19671.2	40968.7	-0.191712	0.0728344	-0.481411
sp|Q99LB6|MAT2B_MOUSE	Q99LB6	MAT2B_MOUSE	Mat2b	Methionine adenosyltransferase 2 subunit beta	39714.5	43513.7	65351.4	44505.6	34538.8	60540.1	43086.7	33429.6	-0.192054	0.208429	-0.313358
sp|Q3UH60|DIP2B_MOUSE	Q3UH60	DIP2B_MOUSE	Dip2b	Disco-interacting protein 2 homolog B	67623.3	37011.1	85388.7	17760.7	36096.6	83455.9	63223.3	19089.1	-0.192286	-0.212909	-0.538463
sp|Q99NH0|ANR17_MOUSE	Q99NH0	ANR17_MOUSE	Ankrd17	Ankyrin repeat domain-containing protein 17	40123	40386.9	55590.7	39104.7	45342.8	46669.1	28602.1	34884	-0.192656	0.0414741	-0.535379
sp|Q497I4|KRT35_MOUSE	Q497I4	KRT35_MOUSE	Krt35	Keratin, type I cuticular Ha5	19041.3	10653.2	598109	14371.2	6864.46	27086.2	27706.4	10860.9	-0.193247	4.17315	0.18394
sp|Q7TMY8|HUWE1_MOUSE	Q7TMY8	HUWE1_MOUSE	Huwe1	E3 ubiquitin-protein ligase HUWE1	28534.1	51186.9	39431.6	48119.1	51489.6	39683.6	26138	37117.4	-0.193649	-0.0584913	-0.527422
sp|P61759|PFD3_MOUSE	P61759	PFD3_MOUSE	Vbp1	Prefoldin subunit 3	49495.6	40603.6	67772.3	39642.7	35556	67525.5	46623.1	34452	-0.194199	0.0594097	-0.346455
sp|Q99020|ROAA_MOUSE	Q99020	ROAA_MOUSE	Hnrnpab	Heterogeneous nuclear ribonucleoprotein A/B	51151.7	20058.2	72595.1	38964.1	37320.9	44150.4	42712.8	40269.8	-0.194213	0.453446	0.0265161
sp|P32921|SYWC_MOUSE	P32921	SYWC_MOUSE	Wars	Tryptophan--tRNA ligase, cytoplasmic	51047.4	39498.9	45429.6	45370.9	45503	58158.4	48771.8	34508.4	-0.195151	-0.191107	-0.315833
sp|Q61503|5NTD_MOUSE	Q61503	5NTD_MOUSE	Nt5e	5'-nucleotidase	87013.8	29084.2	131579	31970.3	41751.6	91183.3	38081.7	15845.7	-0.195377	0.299004	-1.30163
sp|Q7TPC1|CDSN_MOUSE	Q7TPC1	CDSN_MOUSE	Cdsn	Corneodesmosin	64297.6	19660.3	96008.4	27661.1	36025.5	60114.8	44228.4	35795.9	-0.195474	0.363277	-0.264703
sp|Q99MR6|SRRT_MOUSE	Q99MR6	SRRT_MOUSE	Srrt	Serrate RNA effector molecule homolog	40468.7	30798.6	46088.2	26693.5	31672.8	49959.5	81062.8	62043.4	-0.195899	-0.165562	0.809875
sp|Q8K2F8|LS14A_MOUSE	Q8K2F8	LS14A_MOUSE	Lsm14a	Protein LSM14 homolog A	64742.3	22075.6	134863	24460.6	31998.7	67540.5	47314	22876.2	-0.19727	0.678623	-0.503994
sp|P61027|RAB10_MOUSE	P61027	RAB10_MOUSE	Rab10	Ras-related protein Rab-10	44734.8	43553	49324.2	40693.2	49767	51486.6	33179.6	41084.5	-0.197688	-0.169699	-0.447236
sp|P70696|H2B1A_MOUSE	P70696	H2B1A_MOUSE	Hist1h2ba	Histone H2B type 1-A	84350.3	28030.5	107111	30493.8	35907.4	93052.8	55845.7	21278.6	-0.198531	0.093606	-0.741669
sp|Q60932|VDAC1_MOUSE	Q60932	VDAC1_MOUSE	Vdac1	Voltage-dependent anion-selective channel protein 1	34169.5	38705.7	40632.5	48774.8	45644.3	37991.7	29790.9	50021.8	-0.198697	0.0962695	-0.0675061
sp|Q3V3R1|C1TM_MOUSE	Q3V3R1	C1TM_MOUSE	Mthfd1l	Monofunctional C1-tetrahydrofolate synthase, mitochondrial	14209.3	55161.4	20559.2	71437.5	59434.2	20251.8	17924.8	38524.3	-0.199999	0.207258	-0.497375
sp|P24270|CATA_MOUSE	P24270	CATA_MOUSE	Cat	Catalase	60480.3	21498.3	111174	29074.2	30991.1	63251.2	45925.4	29121.7	-0.201129	0.573535	-0.32858
sp|Q8CCB4|VPS53_MOUSE	Q8CCB4	VPS53_MOUSE	Vps53	Vacuolar protein sorting-associated protein 53 homolog	58218.4	32916.9	73088.3	41692.4	39671.4	65133.4	52066	26185.4	-0.201622	0.131175	-0.421515
sp|P47754|CAZA2_MOUSE	P47754	CAZA2_MOUSE	Capza2	F-actin-capping protein subunit alpha-2	39121.4	33111.8	48552.7	39989.4	34772.3	48295.8	56988	52036.7	-0.201631	0.0920692	0.392289
sp|Q9CXY6|ILF2_MOUSE	Q9CXY6	ILF2_MOUSE	Ilf2	Interleukin enhancer-binding factor 2	53361.6	35872	59227.7	36375	38343.7	64365.7	46503	33652.4	-0.202909	-0.103445	-0.357698
sp|Q8VCI0|PLBL1_MOUSE	Q8VCI0	PLBL1_MOUSE	Plbd1	Phospholipase B-like 1	47072.7	29522.3	83048.2	35970.4	16514.4	71653.6	43727.4	29688.9	-0.203005	0.432859	-0.264156
sp|O35691|PININ_MOUSE	O35691	PININ_MOUSE	Pnn	Pinin	53435	25305.6	110516	25036.6	31157	59485.9	52523.7	31948.6	-0.203087	0.580592	-0.101716
sp|O55142|RL35A_MOUSE	O55142	RL35A_MOUSE	Rpl35a	60S ribosomal protein L35a	66950.9	24427.5	92315.5	30001.1	34463.9	70729.7	47275.1	23986.3	-0.203122	0.217574	-0.561855
sp|P63276|RS17_MOUSE	P63276	RS17_MOUSE	Rps17	40S ribosomal protein S17	59537.5	36911.5	70473.4	33907.1	29171.1	81875	64522.8	27864	-0.203319	-0.0893063	-0.2654
sp|Q9CZW5|TOM70_MOUSE	Q9CZW5	TOM70_MOUSE	Tomm70a	Mitochondrial import receptor subunit TOM70	21120.3	49712.7	29916.6	62630.6	54998.8	26569.6	16400.6	44385.9	-0.203589	0.18218	-0.42426
sp|Q7TMB8|CYFP1_MOUSE	Q7TMB8	CYFP1_MOUSE	Cyfip1	Cytoplasmic FMR1-interacting protein 1	28135.2	48598	29757.1	42429.7	41562.9	46804.3	25924.4	52616.5	-0.203659	-0.291776	-0.170066
tr|Q91X76|Q91X76_MOUSE	Q91X76	Q91X76_MOUSE	Nt5dc2	5'-nucleotidase domain containing 2	21536.3	53264.6	33351	53974.8	48816.2	37388.4	27190	46662.7	-0.20471	0.0186446	-0.223115
sp|Q6GQT9|NOMO1_MOUSE	Q6GQT9	NOMO1_MOUSE	Nomo1	Nodal modulator 1	34465.3	45992.2	35700.1	45160.6	38498.7	54259.8	35449.7	40951.5	-0.205253	-0.19804	-0.279884
sp|Q8VEM8|MPCP_MOUSE	Q8VEM8	MPCP_MOUSE	Slc25a3	Phosphate carrier protein, mitochondrial	40398.3	18113.6	208577	26354.7	27259.5	40202.7	26313.4	23698.6	-0.205349	1.80009	-0.431804
tr|E9Q7L0|E9Q7L0_MOUSE	E9Q7L0	E9Q7L0_MOUSE	Ogdhl	Protein Ogdhl	12486.9	56270.9	16519.3	64103.4	59126.1	20214.8	18100.6	45083.1	-0.206543	0.0231205	-0.328515
sp|P80315|TCPD_MOUSE	P80315	TCPD_MOUSE	Cct4	T-complex protein 1 subunit delta	52575.7	30859.9	79822.6	38990.8	41478.6	54884.9	43249.4	28071.8	-0.207823	0.302138	-0.434155
sp|Q62504|MINT_MOUSE	Q62504	MINT_MOUSE	Spen	Msx2-interacting protein	44908.6	32954.6	30821.5	36009.4	41393.8	48562.9	54885	48453.1	-0.208288	-0.428714	0.200071
sp|P18406|CYR61_MOUSE	P18406	CYR61_MOUSE	Cyr61	Protein CYR61	37595.8	31671.2	62865.4	35423.8	34926.8	45111.4	61209	49566.7	-0.208521	0.296344	0.468881
sp|P23475|XRCC6_MOUSE	P23475	XRCC6_MOUSE	Xrcc6	X-ray repair cross-complementing protein 6	45683.3	39597.6	48974.1	35718.8	41506.9	57115.1	46618.2	39589.4	-0.209686	-0.219669	-0.194094
sp|P08752|GNAI2_MOUSE	P08752	GNAI2_MOUSE	Gnai2	Guanine nucleotide-binding protein G(i) subunit alpha-2	37232	44819.5	46679.2	47837.6	45644.8	49268	36161.6	36917.5	-0.210073	-0.00603088	-0.377144
sp|Q505F5|LRC47_MOUSE	Q505F5	LRC47_MOUSE	Lrrc47	Leucine-rich repeat-containing protein 47	56459.5	38881.4	65971.9	34869.9	34783.7	75511.5	41887	33307.6	-0.210202	-0.129275	-0.552668
sp|P61963|DCAF7_MOUSE	P61963	DCAF7_MOUSE	Dcaf7	DDB1- and CUL4-associated factor 7	34936.3	42652.8	39974.8	40543	41877	47898.9	36804.1	50763.9	-0.210475	-0.157021	-0.0359258
sp|Q61335|BAP31_MOUSE	Q61335	BAP31_MOUSE	Bcap31	B-cell receptor-associated protein 31	63586.9	35984.5	54639.2	42073.3	35357.2	79856.1	64611.3	22852.5	-0.210504	-0.252533	-0.39755
sp|Q8C167|PPCEL_MOUSE	Q8C167	PPCEL_MOUSE	Prepl	Prolyl endopeptidase-like	17556.5	53314.1	20388.6	57363.8	58082.3	23953.6	21807.1	46605.9	-0.211068	-0.0773661	-0.261985
sp|P11835|ITB2_MOUSE	P11835	ITB2_MOUSE	Itgb2	Integrin beta-2	70316.6	26345.3	102689	25224.7	40662.8	71258.1	56947.1	23658	-0.21146	0.192694	-0.473538
sp|P16254|SRP14_MOUSE	P16254	SRP14_MOUSE	Srp14	Signal recognition particle 14 kDa protein	82398	28617.2	75444.2	33227.6	35366.4	93188.8	58115.3	23726.2	-0.21163	-0.242411	-0.651483
sp|Q9JLQ0|CD2AP_MOUSE	Q9JLQ0	CD2AP_MOUSE	Cd2ap	CD2-associated protein	71985.9	33603.2	120575	40018	38709.2	83664.1	36383.2	15155.1	-0.212827	0.392123	-1.24757
sp|Q07076|ANXA7_MOUSE	Q07076	ANXA7_MOUSE	Anxa7	Annexin A7	22091.1	48783.7	28305.3	36523.3	51675.3	30481.8	29588	57731.2	-0.213112	-0.341754	0.0879148
sp|Q9WVA3|BUB3_MOUSE	Q9WVA3	BUB3_MOUSE	Bub3	Mitotic checkpoint protein BUB3	46442.3	32831.8	69802.5	33645.6	34739.6	57165.3	48061.1	44454.1	-0.213293	0.170694	0.00954816
sp|P35700|PRDX1_MOUSE	P35700	PRDX1_MOUSE	Prdx1	Peroxiredoxin-1	28316.7	39758.6	35813.4	47044.3	43339.8	35611.2	32435.5	58257.7	-0.213827	0.0696767	0.200036
sp|Q8CCP0|NEMF_MOUSE	Q8CCP0	NEMF_MOUSE	Nemf	Nuclear export mediator factor Nemf	18892.8	52539.2	15222.8	55797.3	59213.5	23732	22000.9	46081.9	-0.215591	-0.223936	-0.284873
sp|Q9CY50|SSRA_MOUSE	Q9CY50	SSRA_MOUSE	Ssr1	Translocon-associated protein subunit alpha	80252.2	22369.6	134980	32360.7	40282.7	78907.5	38326.8	18314.8	-0.215927	0.489527	-1.07333
sp|Q922U1|PRPF3_MOUSE	Q922U1	PRPF3_MOUSE	Prpf3	U4/U6 small nuclear ribonucleoprotein Prp3	39567	38711	41764.5	43716.1	38976.4	51962.2	50318.5	49370.7	-0.216285	-0.0892943	0.132545
sp|O35900|LSM2_MOUSE	O35900	LSM2_MOUSE	Lsm2	U6 snRNA-associated Sm-like protein LSm2	38753.4	41208.1	49396.4	41375.8	35999.4	56934.6	46395.6	45329.3	-0.216899	-0.0339548	-0.018893
sp|P70168|IMB1_MOUSE	P70168	IMB1_MOUSE	Kpnb1	Importin subunit beta-1	61938.5	37553.1	75705.4	43389.5	45604.3	70073.5	40960.3	25779.5	-0.217464	0.0420002	-0.793493
sp|Q9CZU4|ERAL1_MOUSE	Q9CZU4	ERAL1_MOUSE	Eral1	GTPase Era, mitochondrial	22294.2	52917.6	26234.1	60061.2	58616.5	28893.8	19955.1	42787.8	-0.218494	-0.0201722	-0.480002
sp|Q9D2V7|CORO7_MOUSE	Q9D2V7	CORO7_MOUSE	Coro7	Coronin-7	16496.4	58464.1	19133.6	52086.2	62276.7	24950.5	20337.7	46618.9	-0.218649	-0.292501	-0.381552
sp|P67778|PHB_MOUSE	P67778	PHB_MOUSE	Phb	Prohibitin	61791.7	26543.3	77708.4	32476.7	32319.4	70488.8	56961.7	43363	-0.2189	0.0999738	-0.0352792
sp|P62077|TIM8B_MOUSE	P62077	TIM8B_MOUSE	Timm8b	Mitochondrial import inner membrane translocase subunit Tim8 B	50308.9	39342.1	60071	45830.3	36745.5	67618.3	56431.1	25609	-0.21923	0.0210993	-0.34722
sp|Q9Z1Q5|CLIC1_MOUSE	Q9Z1Q5	CLIC1_MOUSE	Clic1	Chloride intracellular channel protein 1	68246.2	34038.5	78276.3	37585.4	23329	95766.1	54962.8	18350.1	-0.219524	-0.0397097	-0.699974
sp|P61161|ARP2_MOUSE	P61161	ARP2_MOUSE	Actr2	Actin-related protein 2	65450.3	32470.9	82900.5	44159.3	34337.9	79755	44040.8	24449.1	-0.220516	0.155299	-0.736247
sp|Q8K126|RF1M_MOUSE	Q8K126	RF1M_MOUSE	Mtrf1	Peptide chain release factor 1, mitochondrial	15928.1	51786.3	18002.2	59771.5	55954.5	22958.7	30705.5	45356.1	-0.220803	-0.0209834	-0.0530966
sp|P54775|PRS6B_MOUSE	P54775	PRS6B_MOUSE	Psmc4	26S protease regulatory subunit 6B	62885	32131.9	78413.5	36098.6	46265.4	64521.2	43418.5	29698.2	-0.221529	0.0477167	-0.599512
sp|Q9JKF1|IQGA1_MOUSE	Q9JKF1	IQGA1_MOUSE	Iqgap1	Ras GTPase-activating-like protein IQGAP1	47962.4	39777.8	60195.5	45834.5	45094.4	57298.1	30440.1	37135.5	-0.222799	0.0503636	-0.599535
sp|P24547|IMDH2_MOUSE	P24547	IMDH2_MOUSE	Impdh2	Inosine-5'-monophosphate dehydrogenase 2	28565.4	49355.1	32255	58678	49203	41759.4	24221.1	40126.6	-0.223269	-0.000467934	-0.499382
tr|Q80X98|Q80X98_MOUSE	Q80X98	Q80X98_MOUSE	Dhx38	DEAH (Asp-Glu-Ala-His) box polypeptide 38	38556.9	43256	44559.9	39447.7	41098.6	54432.6	37853.4	43501.8	-0.223643	-0.185452	-0.231737
sp|Q9CQU0|TXD12_MOUSE	Q9CQU0	TXD12_MOUSE	Txndc12	Thioredoxin domain-containing protein 12	80897.5	27027.7	61775.5	42025.3	35219	90959.9	55937.8	25733.9	-0.225439	-0.281653	-0.627563
sp|Q9QUI0|RHOA_MOUSE	Q9QUI0	RHOA_MOUSE	Rhoa	Transforming protein RhoA	93494	26994.3	63251.2	38989.5	37494.4	103426	53665.7	19710.9	-0.225984	-0.462908	-0.941486
sp|Q9ESW4|AGK_MOUSE	Q9ESW4	AGK_MOUSE	Agk	Acylglycerol kinase, mitochondrial	15036	48023.9	22331.4	51649.9	53951.8	19810.7	19914.1	55856.7	-0.226166	0.00427252	0.0387545
sp|Q8BSQ9|PB1_MOUSE	Q8BSQ9	PB1_MOUSE	Pbrm1	Protein polybromo-1	50895.7	38059.3	59701.2	35973.5	35255.2	68821.3	47207.2	29065.9	-0.226497	-0.121436	-0.448398
sp|Q91YP0|L2HDH_MOUSE	Q91YP0	L2HDH_MOUSE	L2hgdh	L-2-hydroxyglutarate dehydrogenase, mitochondrial	29230.2	48984.1	47138.2	48592	47839.6	43680.8	33026.6	41989.9	-0.226661	0.0648818	-0.286884
sp|P48428|TBCA_MOUSE	P48428	TBCA_MOUSE	Tbca	Tubulin-specific chaperone A	78102	34041.3	76512.5	35899	41946.6	89322.1	52989	21269.5	-0.22718	-0.223734	-0.821894
sp|P35761|TTK_MOUSE	P35761	TTK_MOUSE	Ttk	Dual specificity protein kinase TTK	14650.7	60131.1	17505.4	49133.4	63666.8	23871.6	19373.5	45010.9	-0.227229	-0.393554	-0.443206
sp|Q9Z2Z6|MCAT_MOUSE	Q9Z2Z6	MCAT_MOUSE	Slc25a20	Mitochondrial carnitine/acylcarnitine carrier protein	19564.9	37775.1	42715.3	49524.5	41021.7	26161.5	31427.8	63466	-0.22856	0.457289	0.498213
sp|Q9DCH4|EIF3F_MOUSE	Q9DCH4	EIF3F_MOUSE	Eif3f	Eukaryotic translation initiation factor 3 subunit F	47224.5	41562.9	65703.6	46007.6	46249.6	57789.9	31130.4	40104.8	-0.228704	0.102643	-0.546467
sp|Q91VT4|CBR4_MOUSE	Q91VT4	CBR4_MOUSE	Cbr4	Carbonyl reductase family member 4	34955	45541.1	35542	50512.2	49693.9	44680.1	37156.7	42902.6	-0.22947	-0.133144	-0.237321
sp|Q61187|TS101_MOUSE	Q61187	TS101_MOUSE	Tsg101	Tumor susceptibility gene 101 protein	57722.6	38273.1	67236.2	38833.8	43505.7	69115.6	42037.9	32450.2	-0.230438	-0.0864627	-0.596398
sp|P42227|STAT3_MOUSE	P42227	STAT3_MOUSE	Stat3	Signal transducer and activator of transcription 3	41749.5	44676.2	55377.5	39759.6	42228.4	59175	36832.5	34808.3	-0.230574	-0.0920264	-0.501253
sp|Q91YW3|DNJC3_MOUSE	Q91YW3	DNJC3_MOUSE	Dnajc3	DnaJ homolog subfamily C member 3	66117.1	33973.1	107269	33965.7	41168.3	76295.8	40105.5	24508.7	-0.23092	0.265873	-0.862299
sp|Q61495|DSG1A_MOUSE	Q61495	DSG1A_MOUSE	Dsg1a	Desmoglein-1-alpha	63506.6	19515.4	93406.4	22310.1	29618.2	67828.5	50193.4	36670.9	-0.23112	0.247908	-0.16585
sp|Q8QZY1|EIF3L_MOUSE	Q8QZY1	EIF3L_MOUSE	Eif3l	Eukaryotic translation initiation factor 3 subunit L	37017.8	39587.8	46182.4	40380.9	38710.6	51217.7	36646.5	51287.4	-0.231325	-0.0550207	-0.0323553
sp|Q9D620|RFIP1_MOUSE	Q9D620	RFIP1_MOUSE	Rab11fip1	Rab11 family-interacting protein 1	66627.7	36996.7	98197.1	12447.8	23836	97827.2	66877.4	14246.1	-0.231529	-0.136957	-0.584702
sp|Q9CQA3|DHSB_MOUSE	Q9CQA3	DHSB_MOUSE	Sdhb	Succinate dehydrogenase [ubiquinone] iron-sulfur subunit, mitochondrial	55888.2	35808.5	68168.6	45717.4	47348.9	60334.9	45144.9	29642	-0.231859	0.0807905	-0.525944
sp|P46061|RAGP1_MOUSE	P46061	RAGP1_MOUSE	Rangap1	Ran GTPase-activating protein 1	56839.4	34484.7	66994.3	44090.3	44999.5	62262.6	41708.4	33117.6	-0.232073	0.0505186	-0.519529
sp|P60904|DNJC5_MOUSE	P60904	DNJC5_MOUSE	Dnajc5	DnaJ homolog subfamily C member 5	59966.4	32813.7	79813.8	33237.9	35575.7	73398	42748	25466.5	-0.232093	0.0530017	-0.675831
sp|Q9Z2N8|ACL6A_MOUSE	Q9Z2N8	ACL6A_MOUSE	Actl6a	Actin-like protein 6A	42837.8	33019	51339.2	42574.9	43153	45952	45707.8	48533.6	-0.232228	0.0758344	0.0808538
sp|P50580|PA2G4_MOUSE	P50580	PA2G4_MOUSE	Pa2g4	Proliferation-associated protein 2G4	47921.6	33140.9	62217.8	38286.5	30553.8	64722.7	53882.4	40142.4	-0.233086	0.0770635	-0.0190789
sp|Q922H2|PDK3_MOUSE	Q922H2	PDK3_MOUSE	Pdk3	[Pyruvate dehydrogenase (acetyl-transferring)] kinase isozyme 3, mitochondrial	40732.2	28048.7	81259.2	26150	38979.4	41870.1	52753.8	43229.5	-0.233231	0.409806	0.247543
sp|Q91ZZ3|SYUB_MOUSE	Q91ZZ3	SYUB_MOUSE	Sncb	Beta-synuclein	58822.7	16499	114801	15289.2	26916.1	61736.4	24890.2	10531.7	-0.235094	0.553286	-1.32352
sp|Q922Q8|LRC59_MOUSE	Q922Q8	LRC59_MOUSE	Lrrc59	Leucine-rich repeat-containing protein 59	52274.7	27920.5	48694.5	28074.4	21650.4	72752.3	64836.2	59755.1	-0.235311	-0.298305	0.400304
sp|Q8CI51|PDLI5_MOUSE	Q8CI51	PDLI5_MOUSE	Pdlim5	PDZ and LIM domain protein 5	44360.9	40856	73821.5	38660.5	38845.8	61498.1	31867.5	38654.2	-0.235743	0.16474	-0.508814
sp|P32037|GTR3_MOUSE	P32037	GTR3_MOUSE	Slc2a3	Solute carrier family 2, facilitated glucose transporter member 3	22118	33772.4	28638.9	40575.5	39496.9	26336	32548.9	72731.7	-0.236208	0.0722641	0.677359
sp|Q8C050|KS6A5_MOUSE	Q8C050	KS6A5_MOUSE	Rps6ka5	Ribosomal protein S6 kinase alpha-5	48852.5	39118	60757.4	35955.5	30233.9	73411.3	45625.6	34288.3	-0.23656	-0.0998725	-0.375135
sp|P10518|HEM2_MOUSE	P10518	HEM2_MOUSE	Alad	Delta-aminolevulinic acid dehydratase	65682.5	21936.8	105048	28539.3	32602.8	70657.2	56373	28391.3	-0.236962	0.371496	-0.284754
sp|O88487|DC1I2_MOUSE	O88487	DC1I2_MOUSE	Dync1i2	Cytoplasmic dynein 1 intermediate chain 2	42910.2	40405.4	41422.5	42580.5	39793.4	58464.3	54442.2	37854.3	-0.237984	-0.226128	-0.0902941
sp|Q9DC70|NDUS7_MOUSE	Q9DC70	NDUS7_MOUSE	Ndufs7	NADH dehydrogenase [ubiquinone] iron-sulfur protein 7, mitochondrial	27723	43726	40748.9	52034.3	52492.7	31848.8	27198	47340.5	-0.239328	0.137622	-0.178257
sp|Q9JKC8|AP3M1_MOUSE	Q9JKC8	AP3M1_MOUSE	Ap3m1	AP-3 complex subunit mu-1	32712.8	46821.2	48608.7	46142.8	55738.3	38150.6	26543	35002.7	-0.239382	0.0131958	-0.609295
sp|P70670|NACAM_MOUSE	P70670	NACAM_MOUSE	Naca	Nascent polypeptide-associated complex subunit alpha, muscle-specific form	65506.9	25258.2	104537	23516.8	38713.7	68439.1	48929.7	24913.1	-0.239459	0.25708	-0.537141
sp|Q9WUA3|K6PP_MOUSE	Q9WUA3	K6PP_MOUSE	Pfkp	ATP-dependent 6-phosphofructokinase, platelet type	44887.2	40796.6	62216.7	37809.5	38076.3	63083.5	37312.1	33653.4	-0.239543	-0.0162591	-0.511449
sp|A2AWA9|RBGP1_MOUSE	A2AWA9	RBGP1_MOUSE	Rabgap1	Rab GTPase-activating protein 1	33478.5	51194	46982	51213.1	48788	51240.8	26713.5	34481.2	-0.240451	-0.0266922	-0.708937
sp|Q9Z2U2|ZN292_MOUSE	Q9Z2U2	ZN292_MOUSE	Zfp292	Zinc finger protein 292	49290.1	38305.4	38366.9	29209.9	42097.2	61397.1	47539.4	39686.9	-0.240623	-0.614952	-0.246716
sp|Q6PGB6|NAA50_MOUSE	Q6PGB6	NAA50_MOUSE	Naa50	N-alpha-acetyltransferase 50	47343.6	32932.4	106966	35463.6	37272.7	57626.6	36664.6	30574.2	-0.24143	0.585776	-0.497104
sp|Q9QZ88|VPS29_MOUSE	Q9QZ88	VPS29_MOUSE	Vps29	Vacuolar protein sorting-associated protein 29	61154.5	44287.6	62706.1	38097.3	21263.2	103389	61490.8	18646.6	-0.241457	-0.306365	-0.63736
sp|Q61166|MARE1_MOUSE	Q61166	MARE1_MOUSE	Mapre1	Microtubule-associated protein RP/EB family member 1	68006.9	37009.4	61524.4	51172.9	19707.8	104497	56516.8	12567.4	-0.242112	-0.140273	-0.846299
sp|P61971|NTF2_MOUSE	P61971	NTF2_MOUSE	Nutf2	Nuclear transport factor 2	64823.4	29149.1	102590	31982.5	33520.7	77644.7	52845.7	26778.5	-0.242397	0.275672	-0.481427
sp|Q9JI44|DMAP1_MOUSE	Q9JI44	DMAP1_MOUSE	Dmap1	DNA methyltransferase 1-associated protein 1	31291.8	47394.6	31853	42386.8	45853.7	47239.1	40538	49443.9	-0.242556	-0.326475	-0.0490351
sp|Q9D6R2|IDH3A_MOUSE	Q9D6R2	IDH3A_MOUSE	Idh3a	Isocitrate dehydrogenase [NAD] subunit alpha, mitochondrial	26908.5	46805.5	38403.4	64624.5	50406.4	36826	27338	37143.6	-0.242925	0.240099	-0.435977
sp|Q99M87|DNJA3_MOUSE	Q99M87	DNJA3_MOUSE	Dnaja3	DnaJ homolog subfamily A member 3, mitochondrial	37656	39865.6	44228.8	46161.4	41348.4	50487.6	46281	40564.2	-0.24446	-0.022893	-0.080614
sp|P70404|IDHG1_MOUSE	P70404	IDHG1_MOUSE	Idh3g	Isocitrate dehydrogenase [NAD] subunit gamma 1, mitochondrial	21009.9	50817	22762.6	64757.8	55354.8	29735.4	22123.5	43319.8	-0.244467	0.0406273	-0.378748
sp|Q9DBR7|MYPT1_MOUSE	Q9DBR7	MYPT1_MOUSE	Ppp1r12a	Protein phosphatase 1 regulatory subunit 12A	35197.5	48883.8	52592.2	43765	40969.9	58651.2	33518.8	40667.7	-0.244665	-0.0480579	-0.425293
sp|P08556|RASN_MOUSE	P08556	RASN_MOUSE	Nras	GTPase NRas	56704.7	34215.2	65779.5	42034.1	42585.6	65169.5	33899.3	37305.8	-0.245088	0.00078451	-0.597702
sp|Q64152|BTF3_MOUSE	Q64152	BTF3_MOUSE	Btf3	Transcription factor BTF3	87079.3	25126.8	81008	42799.8	39070.6	94091.4	60432.9	14552.5	-0.247031	-0.105079	-0.8285
sp|Q9ERG2|STRN3_MOUSE	Q9ERG2	STRN3_MOUSE	Strn3	Striatin-3	57375.8	21691.8	99290.6	25689.4	38156.4	55680.9	46798	28852.2	-0.247073	0.413465	-0.310818
sp|Q8R3K3|PTCD2_MOUSE	Q8R3K3	PTCD2_MOUSE	Ptcd2	Pentatricopeptide repeat-containing protein 2, mitochondrial	18478	55781.5	25101.5	48924.2	56070.8	32100.7	21979.8	44858.7	-0.247737	-0.252285	-0.399633
sp|Q61102|ABCB7_MOUSE	Q61102	ABCB7_MOUSE	Abcb7	ATP-binding cassette sub-family B member 7, mitochondrial	17659.4	45683.1	27242.8	53311.8	56563.5	18654	44379.9	47798.9	-0.247896	0.0988986	0.293367
sp|O08709|PRDX6_MOUSE	O08709	PRDX6_MOUSE	Prdx6	Peroxiredoxin-6	87034.4	22560.5	126611	33963.6	42798.4	87362.6	52128.2	14609.3	-0.248116	0.302943	-0.963729
sp|Q99MK8|ARBK1_MOUSE	Q99MK8	ARBK1_MOUSE	Adrbk1	Beta-adrenergic receptor kinase 1	31919.7	49633.3	44929	52678.6	51770.4	45169	23333.4	35388.7	-0.249346	0.00990913	-0.723181
sp|Q9D0F9|PGM1_MOUSE	Q9D0F9	PGM1_MOUSE	Pgm1	Phosphoglucomutase-1	64379.7	22091.1	180273	20666.5	36726	66140.6	40224.6	14534.4	-0.250491	0.965986	-0.909604
sp|Q6IME9|K2C72_MOUSE	Q6IME9	K2C72_MOUSE	Krt72	Keratin, type II cytoskeletal 72	46864.7	23784.7	103842	23881.3	31084.6	52965.9	39965.2	43852.2	-0.250578	0.60369	-0.00400532
sp|Q8R3F5|FABD_MOUSE	Q8R3F5	FABD_MOUSE	Mcat	Malonyl-CoA-acyl carrier protein transacylase, mitochondrial	28940.1	44501.3	37220.3	56601.4	51965.7	35419.1	29721.7	46414.5	-0.25079	0.102538	-0.198802
sp|P31001|DESM_MOUSE	P31001	DESM_MOUSE	Des	Desmin	71129.5	24592.7	84377.6	33948.5	35334.9	78573.9	75895.1	20166.7	-0.250954	0.0548891	-0.245843
sp|Q9CZ13|QCR1_MOUSE	Q9CZ13	QCR1_MOUSE	Uqcrc1	Cytochrome b-c1 complex subunit 1, mitochondrial	39092.8	44345.4	40854.6	46692.5	46959.1	52347.2	28894.9	44953.6	-0.251177	-0.181826	-0.427317
sp|Q9Z1N5|DX39B_MOUSE	Q9Z1N5	DX39B_MOUSE	Ddx39b	Spliceosome RNA helicase Ddx39b	42778.7	33858.9	90472.4	33022.2	35160.2	56091	41613	41899	-0.251793	0.436531	-0.127861
sp|P62311|LSM3_MOUSE	P62311	LSM3_MOUSE	Lsm3	U6 snRNA-associated Sm-like protein LSm3	45548.4	23215.8	206912	17724.4	30393.4	51512.2	42881.7	21980.6	-0.252303	1.45556	-0.336583
sp|Q8R050|ERF3A_MOUSE	Q8R050	ERF3A_MOUSE	Gspt1	Eukaryotic peptide chain release factor GTP-binding subunit ERF3A	30806.2	45930.2	48581.1	51619.3	49811	41610.6	26463.1	35771.6	-0.252623	0.132281	-0.554816
sp|Q8R180|ERO1A_MOUSE	Q8R180	ERO1A_MOUSE	Ero1l	ERO1-like protein alpha	54349.9	27536	130549	26858.2	27451.9	70151.7	55905	20408.2	-0.25332	0.689492	-0.355002
sp|Q91WK2|EIF3H_MOUSE	Q91WK2	EIF3H_MOUSE	Eif3h	Eukaryotic translation initiation factor 3 subunit H	40024.7	36373.9	45312.9	46344.9	42007	49070	37696.7	45525.6	-0.253541	0.00917025	-0.130116
sp|Q99M73|KRT84_MOUSE	Q99M73	KRT84_MOUSE	Krt84	Keratin, type II cuticular Hb4	26687.6	28954.8	47421.2	21631.7	23375.6	42973.9	14560.9	77810.4	-0.2539	0.0576193	0.477361
sp|Q9JLI8|SART3_MOUSE	Q9JLI8	SART3_MOUSE	Sart3	Squamous cell carcinoma antigen recognized by T-cells 3	40763.7	36959.5	42051.8	40705.2	40511.1	52203.8	47368.7	39035.4	-0.254457	-0.16392	-0.101701
sp|Q8C1B7|SEP11_MOUSE	Q8C1B7	SEP11_MOUSE	42258	Septin-11	52888.1	35732.7	57331.6	40345.2	43449.4	62347.2	47139.8	34764.8	-0.255576	-0.115205	-0.369278
sp|Q9Z2I0|LETM1_MOUSE	Q9Z2I0	LETM1_MOUSE	Letm1	LETM1 and EF-hand domain-containing protein 1, mitochondrial	62258.8	36066.1	74172.8	38938.2	36178.5	81209.5	39958.7	29749.1	-0.255656	-0.0535452	-0.751894
sp|P50516|VATA_MOUSE	P50516	VATA_MOUSE	Atp6v1a	V-type proton ATPase catalytic subunit A	46648.5	36096.5	56586.4	43359.3	42409.4	56459.4	44110.7	34437.1	-0.256845	0.0156288	-0.331944
sp|Q8BG51|MIRO1_MOUSE	Q8BG51	MIRO1_MOUSE	Rhot1	Mitochondrial Rho GTPase 1	15787.2	54302.8	25885.8	57892.2	47294.8	36457.4	18812.3	52508.9	-0.256918	0.000444541	-0.231796
sp|P16332|MUTA_MOUSE	P16332	MUTA_MOUSE	Mut	Methylmalonyl-CoA mutase, mitochondrial	28606.4	46647.3	37073.9	56334.7	54708.2	35249.7	21737.8	43530.3	-0.257486	0.0543057	-0.462871
sp|P63325|RS10_MOUSE	P63325	RS10_MOUSE	Rps10	40S ribosomal protein S10	57958.1	23341.3	167104	23189.7	35694.5	61498.8	48864.3	18925.7	-0.257613	0.9693	-0.519787
sp|P21300|ALD1_MOUSE	P21300	ALD1_MOUSE	Akr1b7	Aldose reductase-related protein 1	58086.9	34678.5	72725.7	36054.8	38219.6	72714.1	49057.9	29195.3	-0.258039	-0.0282785	-0.503476
sp|Q9D6F9|TBB4A_MOUSE	Q9D6F9	TBB4A_MOUSE	Tubb4a	Tubulin beta-4A chain	39039.1	46208.2	39731.7	49190.1	47831.1	54129.8	35362.4	37346.9	-0.25829	-0.197407	-0.487804
sp|P35123|UBP4_MOUSE	P35123	UBP4_MOUSE	Usp4	Ubiquitin carboxyl-terminal hydrolase 4	15248	63675.7	29314	47254.9	62722	31702.2	17851.3	38413.8	-0.258698	-0.302399	-0.746916
sp|Q9D0T1|NH2L1_MOUSE	Q9D0T1	NH2L1_MOUSE	Nhp2l1	NHP2-like protein 1	53456.9	35144.5	69957.4	39687.5	34160.2	71866.5	60568.1	35641	-0.259027	0.0484101	-0.140184
sp|P97384|ANX11_MOUSE	P97384	ANX11_MOUSE	Anxa11	Annexin A11	54185.1	40695.1	44622.2	37248.7	44266.8	69374.8	35106.4	46048.6	-0.260312	-0.473069	-0.485739
sp|Q9Z2I8|SUCB2_MOUSE	Q9Z2I8	SUCB2_MOUSE	Suclg2	Succinyl-CoA ligase [GDP-forming] subunit beta, mitochondrial	23369.7	46285.1	28003.4	61483.6	54997.5	28542.5	22984.5	49173.5	-0.262245	0.0992095	-0.211308
sp|P46460|NSF_MOUSE	P46460	NSF_MOUSE	Nsf	Vesicle-fusing ATPase	37599.5	49495.6	40899.8	52184	48067	56412.2	25719.9	32607.2	-0.262551	-0.166613	-0.840978
sp|Q3UMC0|SPAT5_MOUSE	Q3UMC0	SPAT5_MOUSE	Spata5	Spermatogenesis-associated protein 5	46610.3	40821.3	76095.3	41076.8	50478.3	54449.3	34167	34376.9	-0.263167	0.159235	-0.614295
sp|Q6NWW9|FND3B_MOUSE	Q6NWW9	FND3B_MOUSE	Fndc3b	Fibronectin type III domain-containing protein 3B	27454.9	39902.9	53345.5	40581.6	36294.6	44581.5	41106.2	53630.6	-0.263869	0.215826	0.228212
sp|Q8C5Q4|GRSF1_MOUSE	Q8C5Q4	GRSF1_MOUSE	Grsf1	G-rich sequence factor 1	21956.5	49988	32427.7	63091.4	50999.3	35409.9	26832.7	42905.4	-0.264301	0.144603	-0.309238
sp|Q99PL6|UBXN6_MOUSE	Q99PL6	UBXN6_MOUSE	Ubxn6	UBX domain-containing protein 6	61432.6	37259.4	70120	43825.1	39744.7	78815.1	27656.3	28927.4	-0.264609	-0.0572766	-1.06716
sp|P17918|PCNA_MOUSE	P17918	PCNA_MOUSE	Pcna	Proliferating cell nuclear antigen	29810.9	37624.7	50750.9	43699.4	42966.2	38125.5	27434.3	54764.6	-0.266043	0.220001	0.0195652
sp|P70460|VASP_MOUSE	P70460	VASP_MOUSE	Vasp	Vasodilator-stimulated phosphoprotein	73517.1	32436.8	69427.2	43709	44207.7	83212.7	37229.8	22992.3	-0.26616	-0.171536	-1.08123
sp|Q9CWU2|ZDH13_MOUSE	Q9CWU2	ZDH13_MOUSE	Zdhhc13	Palmitoyltransferase ZDHHC13	30683	46142.7	49878.4	50044.4	43875.4	48553.8	26342.4	39600.7	-0.26676	0.112465	-0.487128
sp|Q5SYD0|MYO1D_MOUSE	Q5SYD0	MYO1D_MOUSE	Myo1d	Unconventional myosin-Id	56988.1	31899.4	75129.1	29946.8	32092.4	74870.9	48124.3	27312.5	-0.267062	-0.0256837	-0.503776
sp|Q3UVK0|ERMP1_MOUSE	Q3UVK0	ERMP1_MOUSE	Ermp1	Endoplasmic reticulum metallopeptidase 1	63281	30038.4	86111.4	38620.1	35373.3	76954.7	45396.3	26544.8	-0.267469	0.151108	-0.642831
sp|P41241|CSK_MOUSE	P41241	CSK_MOUSE	Csk	Tyrosine-protein kinase CSK	34440.4	44530.8	56240.7	45146.9	42862.4	52201.9	43710.8	32029.1	-0.267578	0.0929053	-0.327851
sp|Q9R1P3|PSB2_MOUSE	Q9R1P3	PSB2_MOUSE	Psmb2	Proteasome subunit beta type-2	72174.5	23504.7	81475.1	36818.4	35194.8	80042	52137.9	24613.5	-0.268324	0.0377689	-0.586337
sp|P35293|RAB18_MOUSE	P35293	RAB18_MOUSE	Rab18	Ras-related protein Rab-18	50239.8	45142	44904.1	40024	40358.9	74537.4	31482.8	44208.8	-0.268547	-0.436019	-0.602127
sp|P56812|PDCD5_MOUSE	P56812	PDCD5_MOUSE	Pdcd5	Programmed cell death protein 5	76731.1	30322.4	71842.9	34009.2	38965	90009.1	73550.5	18094.4	-0.26875	-0.285031	-0.492956
sp|P14211|CALR_MOUSE	P14211	CALR_MOUSE	Calr	Calreticulin	24514.5	43139	38727.9	49669.9	50286.7	31245.2	33338.3	45919.3	-0.269201	0.116646	-0.0408149
sp|Q80YD1|SUV3_MOUSE	Q80YD1	SUV3_MOUSE	Supv3l1	ATP-dependent RNA helicase SUPV3L1, mitochondrial	13444	52945.1	23438.5	63758.7	57798.6	22286.4	19804.9	47757.9	-0.270586	0.122749	-0.245302
sp|Q8CC88|VWA8_MOUSE	Q8CC88	VWA8_MOUSE	Vwa8	von Willebrand factor A domain-containing protein 8	24371.4	50290.5	28843.1	55837.3	54348.6	35747	30078.4	39961	-0.271083	-0.0894287	-0.36329
sp|Q9ERI5|JMJD6_MOUSE	Q9ERI5	JMJD6_MOUSE	Jmjd6	Bifunctional arginine demethylase and lysyl-hydroxylase JMJD6	65831.1	30411.2	82194.9	22418.9	39675.9	76478.3	43530.8	21583	-0.271298	-0.150967	-0.835006
sp|Q9CZN8|GATA_MOUSE	Q9CZN8	GATA_MOUSE	Qrsl1	Glutamyl-tRNA(Gln) amidotransferase subunit A, mitochondrial	21575.5	46582.4	27590.5	59541	55068.3	27212.2	27175.1	46519.3	-0.271668	0.0826447	-0.158995
sp|Q3U186|SYRM_MOUSE	Q3U186	SYRM_MOUSE	Rars2	Probable arginine--tRNA ligase, mitochondrial	19636.7	52393.4	29566.6	60592	58990.1	27966.1	20853	42967	-0.271689	0.0521767	-0.446279
sp|Q61696|HS71A_MOUSE	Q61696	HS71A_MOUSE	Hspa1a	Heat shock 70 kDa protein 1A	55078.4	28260.2	128520	27520.1	42301.5	58315.1	65286.3	21170.9	-0.271811	0.633051	-0.21881
sp|P29758|OAT_MOUSE	P29758	OAT_MOUSE	Oat	Ornithine aminotransferase, mitochondrial	33761.7	40659.5	38321.1	54651.1	49973.8	39891.3	32646.5	44637	-0.272047	0.049039	-0.217599
sp|Q9D287|SPF27_MOUSE	Q9D287	SPF27_MOUSE	Bcas2	Pre-mRNA-splicing factor SPF27	51665.5	37242.5	30849.7	45426.4	43506.5	63903	58974	33847.9	-0.272736	-0.493817	-0.210585
sp|P05214|TBA3_MOUSE	P05214	TBA3_MOUSE	Tuba3a	Tubulin alpha-3 chain	32621.3	48003.8	35062.9	53885.7	50670.4	46770.4	26904.8	33814.7	-0.273296	-0.131552	-0.682366
tr|Q6ZWQ7|Q6ZWQ7_MOUSE	Q6ZWQ7	Q6ZWQ7_MOUSE	Spcs3	Signal peptidase complex subunit 3	65552.6	28122.9	75062.9	40556.1	47744.4	65484.9	45888	28967.9	-0.273504	0.0301321	-0.597058
tr|Q99N15|Q99N15_MOUSE	Q99N15	Q99N15_MOUSE	Hsd17b10	17beta-hydroxysteroid dehydrogenase type 10/short chain L-3-hydroxyacyl-CoA dehydrogenase	46573.8	39107.7	57216.8	43944.3	59619.4	43971	35264	35880.5	-0.273834	-0.0342362	-0.542065
sp|Q91UZ5|IMPA2_MOUSE	Q91UZ5	IMPA2_MOUSE	Impa2	Inositol monophosphatase 2	60248.4	24567.7	96361.2	32643.4	27837.6	74714.5	43418.4	30191.1	-0.273946	0.331066	-0.478393
sp|P62192|PRS4_MOUSE	P62192	PRS4_MOUSE	Psmc1	26S protease regulatory subunit 4	33130.7	45404	41182.2	49025.9	49413.6	45714.3	35817.7	40541.8	-0.276538	-0.0766122	-0.317061
sp|Q3TLH4|PRC2C_MOUSE	Q3TLH4	PRC2C_MOUSE	Prrc2c	Protein PRRC2C	47123.5	25040	54622.8	38744.1	34640.7	52775.9	59939.1	49935.1	-0.276637	0.0950041	0.329875
sp|Q8VHE0|SEC63_MOUSE	Q8VHE0	SEC63_MOUSE	Sec63	Translocation protein SEC63 homolog	54608.8	33346.4	79622.8	36743.9	43329.2	63218.2	46335.5	31719.2	-0.276654	0.127182	-0.448938
sp|Q6PAM0|AAKB2_MOUSE	Q6PAM0	AAKB2_MOUSE	Prkab2	5'-AMP-activated protein kinase subunit beta-2	72621.2	21189.5	96065.2	22411.4	34061.8	79603.3	54559	20413.9	-0.276965	0.0598133	-0.600348
sp|Q7TMM9|TBB2A_MOUSE	Q7TMM9	TBB2A_MOUSE	Tubb2a	Tubulin beta-2A chain	51301.7	39146.5	68660.7	46430.9	47198.3	62403.1	33401.6	29579.1	-0.277104	0.0705158	-0.799285
sp|Q9DC69|NDUA9_MOUSE	Q9DC69	NDUA9_MOUSE	Ndufa9	NADH dehydrogenase [ubiquinone] 1 alpha subcomplex subunit 9, mitochondrial	33164.4	41305.3	47047.4	49468.8	50977.2	39300	29948	46459.6	-0.277707	0.0964093	-0.240644
sp|Q3URE1|ACSF3_MOUSE	Q3URE1	ACSF3_MOUSE	Acsf3	Acyl-CoA synthetase family member 3, mitochondrial	23453.6	49455.1	32793.5	59948.3	54497.7	33972.5	31477.6	39063	-0.279102	0.0680302	-0.326739
sp|Q3UKJ7|SMU1_MOUSE	Q3UKJ7	SMU1_MOUSE	Smu1	WD40 repeat-containing protein SMU1	34349.4	36592.2	55378.9	32247.8	39984.8	46133.3	52570	48385.5	-0.279686	0.0250541	0.22933
sp|Q61176|ARGI1_MOUSE	Q61176	ARGI1_MOUSE	Arg1	Arginase-1	62842.5	18752.6	113600	21936.2	29429.6	69678.4	51372.1	32873.9	-0.280519	0.451608	-0.234393
sp|Q68FD5|CLH1_MOUSE	Q68FD5	CLH1_MOUSE	Cltc	Clathrin heavy chain 1	48386.5	37561.3	56078.4	42334.3	40504	64008.9	38862.2	40462.3	-0.282149	-0.0867652	-0.397844
sp|Q8K268|ABCF3_MOUSE	Q8K268	ABCF3_MOUSE	Abcf3	ATP-binding cassette sub-family F member 3	20324.4	46735.6	75204.7	42067.3	47556.5	33991.7	68471.7	29221.1	-0.2822	0.524133	0.2606
sp|Q9CQI3|GMFB_MOUSE	Q9CQI3	GMFB_MOUSE	Gmfb	Glia maturation factor beta	74976.9	31235.2	83652.6	32207.3	42472.3	86733.4	48404.1	22875.1	-0.282721	-0.157288	-0.858115
sp|Q9CY58|PAIRB_MOUSE	Q9CY58	PAIRB_MOUSE	Serbp1	Plasminogen activator inhibitor 1 RNA-binding protein	40470.9	34420.1	36832.3	34004.7	38286.7	52832.2	84680.3	40620	-0.282959	-0.363246	0.459568
sp|O35593|PSDE_MOUSE	O35593	PSDE_MOUSE	Psmd14	26S proteasome non-ATPase regulatory subunit 14	39484.1	38186.3	53026.6	48919.4	47208	47313.5	34285.6	42681	-0.283279	0.10909	-0.296411
sp|Q99KR7|PPIF_MOUSE	Q99KR7	PPIF_MOUSE	Ppif	Peptidyl-prolyl cis-trans isomerase F, mitochondrial	61703.6	33036.5	71881.6	35057.7	49341.6	65966.6	57288.9	26636.6	-0.283448	-0.108703	-0.458314
tr|E0CX20|E0CX20_MOUSE	E0CX20	E0CX20_MOUSE	Bud31	Protein BUD31 homolog	38612	44958.7	40472.7	45604.5	35738.1	65981	44109.1	39118.1	-0.28352	-0.240886	-0.289463
sp|Q9JLF6|TGM1_MOUSE	Q9JLF6	TGM1_MOUSE	Tgm1	Protein-glutamine gamma-glutamyltransferase K	56916.2	25789.3	103309	31304.8	29095.9	71588.8	40909.8	30243.1	-0.28379	0.418985	-0.50085
tr|Q6ZWZ6|Q6ZWZ6_MOUSE	Q6ZWZ6	Q6ZWZ6_MOUSE	Rps12	40S ribosomal protein S12	65757.1	29911.2	71993.6	38218.3	32896.4	83587.1	54067.5	34864.2	-0.284014	-0.0798453	-0.389357
sp|Q9JK48|SHLB1_MOUSE	Q9JK48	SHLB1_MOUSE	Sh3glb1	Endophilin-B1	56654.4	39926.2	50384.8	42434.7	42885.4	74712	45265.7	26619.3	-0.28405	-0.341357	-0.710093
sp|P62270|RS18_MOUSE	P62270	RS18_MOUSE	Rps18	40S ribosomal protein S18	55868.6	37981.3	67376.2	41788.7	42543.7	71758.6	48227.1	28932.3	-0.284428	-0.0663457	-0.566939
sp|Q9DBG7|SRPR_MOUSE	Q9DBG7	SRPR_MOUSE	Srpr	Signal recognition particle receptor subunit alpha	25389.8	46821.3	31084.4	45246	48878.4	39073.5	24659.8	51610.5	-0.284493	-0.204456	-0.205593
sp|P25206|MCM3_MOUSE	P25206	MCM3_MOUSE	Mcm3	DNA replication licensing factor MCM3	26661.8	47936.2	30642.3	49048.8	47736.9	43183	27709.9	44131.1	-0.285459	-0.190177	-0.339789
sp|Q9D1J3|SARNP_MOUSE	Q9D1J3	SARNP_MOUSE	Sarnp	SAP domain-containing ribonucleoprotein	66017.9	32050.5	61049.2	29416.9	42110.7	77483.3	62033.1	33934.4	-0.286284	-0.402697	-0.317528
sp|Q14C51|PTCD3_MOUSE	Q14C51	PTCD3_MOUSE	Ptcd3	Pentatricopeptide repeat domain-containing protein 3, mitochondrial	22712.2	49714.5	31524	64239.8	60961.5	27396	20520.4	37420.5	-0.28683	0.116129	-0.60877
sp|Q64516|GLPK_MOUSE	Q64516	GLPK_MOUSE	Gk	Glycerol kinase	24554.2	41533.2	18504.6	49339.1	53319.4	27314.5	16950.6	64645.2	-0.287013	-0.249174	0.0171084
sp|P52432|RPAC1_MOUSE	P52432	RPAC1_MOUSE	Polr1c	DNA-directed RNA polymerases I and III subunit RPAC1	46619.9	33426.3	44317.1	41287	38945.2	58743.2	43671.2	49065.5	-0.287354	-0.190506	-0.0750471
sp|Q8K310|MATR3_MOUSE	Q8K310	MATR3_MOUSE	Matr3	Matrin-3	48942.8	31941.6	51357.7	31007.3	37330.4	61381.1	52862.8	38472.7	-0.287357	-0.261188	-0.112043
sp|P54728|RD23B_MOUSE	P54728	RD23B_MOUSE	Rad23b	UV excision repair protein RAD23 homolog B	50171.6	39660.9	56686.3	43098.8	44398.8	65256.4	33738.5	31739	-0.287664	-0.136078	-0.743903
sp|Q6P5E4|UGGG1_MOUSE	Q6P5E4	UGGG1_MOUSE	Uggt1	UDP-glucose:glycoprotein glucosyltransferase 1	58977.5	30542.2	68559.7	38114.4	40123.1	69172.8	44352.4	38954.8	-0.287963	-0.0350307	-0.391727
sp|Q9CXF4|TBC15_MOUSE	Q9CXF4	TBC15_MOUSE	Tbc1d15	TBC1 domain family member 15	21217.9	49727.1	34172.5	51114.9	54353.7	32350.1	22267.2	42404.5	-0.289395	-0.0237616	-0.42296
sp|P62821|RAB1A_MOUSE	P62821	RAB1A_MOUSE	Rab1A	Ras-related protein Rab-1A	46177	40251.7	52758	45701.7	46575.8	59151.6	34732	34419.5	-0.290767	-0.102744	-0.612516
sp|Q91WK1|SPRY4_MOUSE	Q91WK1	SPRY4_MOUSE	Spryd4	SPRY domain-containing protein 4	32019.5	43630.3	48029.6	52993.3	54579.4	37985.3	32576	43376.6	-0.291126	0.126148	-0.285364
sp|P24369|PPIB_MOUSE	P24369	PPIB_MOUSE	Ppib	Peptidyl-prolyl cis-trans isomerase B	48837.3	31328.1	68706.7	43756.5	45263.6	52899.1	39815	40291.5	-0.292196	0.196204	-0.293259
sp|Q9R0Q6|ARC1A_MOUSE	Q9R0Q6	ARC1A_MOUSE	Arpc1a	Actin-related protein 2/3 complex subunit 1A	44352.7	34763.5	60671.9	38200.5	41066.2	55842.7	45607.2	36871.1	-0.292656	0.028939	-0.232616
sp|P51175|PPOX_MOUSE	P51175	PPOX_MOUSE	Ppox	Protoporphyrinogen oxidase	22261.6	50157.2	27692.4	60028.7	59577	29150.6	23883	39272.3	-0.293019	-0.0164598	-0.49048
sp|Q01768|NDKB_MOUSE	Q01768	NDKB_MOUSE	Nme2	Nucleoside diphosphate kinase B	87433.8	23260.6	123331	35533.9	37507.8	98123.1	63606.8	13372.1	-0.293104	0.228116	-0.817152
sp|Q921G7|ETFD_MOUSE	Q921G7	ETFD_MOUSE	Etfdh	Electron transfer flavoprotein-ubiquinone oxidoreductase, mitochondrial	38393.8	40907.2	52946.8	44603.1	45369.2	51829.7	53514.6	36744.6	-0.293602	0.00520041	-0.106866
sp|Q8CAQ8|IMMT_MOUSE	Q8CAQ8	IMMT_MOUSE	Immt	Mitochondrial inner membrane protein	26317.8	40291.2	29763.6	56610.9	52478.9	29182.1	25189.8	45387.6	-0.293931	0.0809599	-0.210439
sp|P51863|VA0D1_MOUSE	P51863	VA0D1_MOUSE	Atp6v0d1	V-type proton ATPase subunit d 1	53087.2	31539.7	67685.4	32412.1	36610.2	67156.2	44742	45321.4	-0.294151	-0.0519341	-0.204326
sp|Q99LP6|GRPE1_MOUSE	Q99LP6	GRPE1_MOUSE	Grpel1	GrpE protein homolog 1, mitochondrial	59699.2	33385.2	65386.6	43657.9	41665.8	72521.7	58018.8	26548.9	-0.294794	-0.0664879	-0.433228
tr|E9Q9B7|E9Q9B7_MOUSE	E9Q9B7	E9Q9B7_MOUSE	Kidins220	Protein Kidins220	61377.8	22596.5	135762	23613.8	34798.1	68250.6	50651	25541.9	-0.295307	0.629111	-0.435599
sp|Q2TPA8|HSDL2_MOUSE	Q2TPA8	HSDL2_MOUSE	Hsdl2	Hydroxysteroid dehydrogenase-like protein 2	58090.5	40632.1	63645.3	48981	35534.9	85628.9	49481.5	25981.6	-0.295506	-0.105415	-0.683116
sp|Q8BIJ6|SYIM_MOUSE	Q8BIJ6	SYIM_MOUSE	Iars2	Isoleucine--tRNA ligase, mitochondrial	46685	39466.7	52730.3	46330	45688	60078.7	43342.7	33707.4	-0.295935	-0.094508	-0.457017
sp|Q9Z1X4|ILF3_MOUSE	Q9Z1X4	ILF3_MOUSE	Ilf3	Interleukin enhancer-binding factor 3	65175.5	28878.7	53613.6	29918.9	37927.7	77584.3	57518.5	33535.5	-0.296477	-0.467633	-0.343247
sp|P84099|RL19_MOUSE	P84099	RL19_MOUSE	Rpl19	60S ribosomal protein L19	39231.5	36468	40368.9	36696.2	35892.2	57078.4	64599.8	49701.6	-0.296492	-0.270698	0.297997
sp|P39447|ZO1_MOUSE	P39447	ZO1_MOUSE	Tjp1	Tight junction protein ZO-1	48498.2	32980.6	70474.7	29796.9	35865.8	64227.1	44096	35359	-0.296843	0.00257259	-0.33313
sp|P62814|VATB2_MOUSE	P62814	VATB2_MOUSE	Atp6v1b2	V-type proton ATPase subunit B, brain isoform	54623.1	33440.4	54197.8	38131.3	32476.4	75715.7	44195.2	40348.5	-0.29698	-0.228739	-0.355825
sp|Q8BIP0|SYDM_MOUSE	Q8BIP0	SYDM_MOUSE	Dars2	Aspartate--tRNA ligase, mitochondrial	19457.7	50964.1	29146.9	59364.2	57596.7	28930.1	23290.1	45419.6	-0.297126	0.0327131	-0.332634
sp|A2BH40|ARI1A_MOUSE	A2BH40	ARI1A_MOUSE	Arid1a	AT-rich interactive domain-containing protein 1A	37369.5	35292.8	54168.9	36295.3	40997.5	48299.2	43742.6	44952.1	-0.297398	0.0187411	-0.0097583
sp|Q9R099|TBL2_MOUSE	Q9R099	TBL2_MOUSE	Tbl2	Transducin beta-like protein 2	25752.4	38341.6	25671.4	50176.5	37283.7	41536	46875	59067.8	-0.298366	-0.0554451	0.426658
sp|Q9R0X4|ACOT9_MOUSE	Q9R0X4	ACOT9_MOUSE	Acot9	Acyl-coenzyme A thioesterase 9, mitochondrial	21725.4	46471.9	23515.5	58168.5	56579	27299.2	21738.9	51110	-0.298581	-0.038242	-0.20339
sp|Q9QZH6|ECSIT_MOUSE	Q9QZH6	ECSIT_MOUSE	Ecsit	Evolutionarily conserved signaling intermediate in Toll pathway, mitochondrial	21768.9	45997.7	19978.8	72758.3	58571.4	24778.4	23703.8	40423.3	-0.298603	0.153969	-0.378243
sp|P63328|PP2BA_MOUSE	P63328	PP2BA_MOUSE	Ppp3ca	Serine/threonine-protein phosphatase 2B catalytic subunit alpha isoform	66007.6	42932.4	81098.5	26576.3	42996.2	91010.7	58131.9	16005.3	-0.298775	-0.315627	-0.854039
sp|P61089|UBE2N_MOUSE	P61089	UBE2N_MOUSE	Ube2n	Ubiquitin-conjugating enzyme E2 N	66096.2	28952.2	120897	35544.3	46126.1	70818.8	49329.3	18431.4	-0.299095	0.419788	-0.787309
sp|P30416|FKBP4_MOUSE	P30416	FKBP4_MOUSE	Fkbp4	Peptidyl-prolyl cis-trans isomerase FKBP4	25496.6	46796	28454.4	51223.5	45955.6	42995.7	32748.4	48302.4	-0.299169	-0.158836	-0.134189
sp|Q8BHS3|RBM22_MOUSE	Q8BHS3	RBM22_MOUSE	Rbm22	Pre-mRNA-splicing factor RBM22	34614.6	32560.7	33744.7	42246.9	50461.2	32229.1	49252.9	55011.7	-0.299789	-0.121881	0.334458
sp|P46660|AINX_MOUSE	P46660	AINX_MOUSE	Ina	Alpha-internexin	76477.1	22043.1	98420.6	35047.5	35599.3	85736	61073.7	25458.4	-0.300507	0.137496	-0.487692
sp|Q9QXS1-3|PLEC_MOUSE	Q9QXS1-3	PLEC_MOUSE	Plec	Isoform PLEC-1A of Plectin	52239.3	25410.9	121226	28611.2	32712.5	62961.1	40061.6	30451.6	-0.30113	0.647201	-0.440227
sp|P26443|DHE3_MOUSE	P26443	DHE3_MOUSE	Glud1	Glutamate dehydrogenase 1, mitochondrial	26936.9	44062.9	36446.5	57766.3	55275.5	32210.8	26561.8	45022.8	-0.301243	0.106865	-0.289408
tr|A7UAK5|A7UAK5_MOUSE	A7UAK5	A7UAK5_MOUSE	Pfkfb3	6-phosphofructo-2-kinase/fructose-2, 6-biphosphatase 3 splice variant 2	71620.4	28136.2	96972	16301.5	31268.9	91695.8	66877.5	17321.1	-0.30176	-0.118434	-0.546376
sp|Q9QXZ0|MACF1_MOUSE	Q9QXZ0	MACF1_MOUSE	Macf1	Microtubule-actin cross-linking factor 1	40140.9	36527	67036.9	37333.4	39480.5	55024.8	40800.3	36108.6	-0.301773	0.143244	-0.297246
tr|Q5NCJ0|Q5NCJ0_MOUSE	Q5NCJ0	Q5NCJ0_MOUSE	Rapgef6	Protein Rapgef6	59929.8	24827.5	87653	32771.6	36488.3	68050.6	52549.4	25001.1	-0.30263	0.204091	-0.430831
sp|O70435|PSA3_MOUSE	O70435	PSA3_MOUSE	Psma3	Proteasome subunit alpha type-3	58230.5	26430.5	100428	34062.8	37820.4	66623.6	48575.2	30046.5	-0.30296	0.364775	-0.409731
sp|Q571F8|GLSL_MOUSE	Q571F8	GLSL_MOUSE	Gls2	Glutaminase liver isoform, mitochondrial	14900.2	51441.7	26671.5	69150.7	52903.6	28945.9	10244	44546.3	-0.303054	0.227386	-0.579054
sp|Q8JZQ9|EIF3B_MOUSE	Q8JZQ9	EIF3B_MOUSE	Eif3b	Eukaryotic translation initiation factor 3 subunit B	29739.2	47547.3	37975	48681.3	52581.2	42801.8	32743.2	43051.2	-0.303515	-0.138426	-0.33164
sp|P41183|BCL6_MOUSE	P41183	BCL6_MOUSE	Bcl6	B-cell lymphoma 6 protein homolog	71858.8	36466.9	107922	28218.6	25005.2	108742	57251.3	15766.2	-0.304134	0.0255942	-0.873194
sp|Q8VE38|OXND1_MOUSE	Q8VE38	OXND1_MOUSE	Oxnad1	Oxidoreductase NAD-binding domain-containing protein 1	14737.5	49983.8	25811.8	65004.2	58712.3	21211.9	20623.5	47932.1	-0.30439	0.184316	-0.221357
sp|P49722|PSA2_MOUSE	P49722	PSA2_MOUSE	Psma2	Proteasome subunit alpha type-2	59582.3	28116.1	83319.4	37112.9	34202.3	74103.3	54202.5	30053.3	-0.304486	0.153114	-0.362261
sp|Q8CAY6|THIC_MOUSE	Q8CAY6	THIC_MOUSE	Acat2	Acetyl-CoA acetyltransferase, cytosolic	68681.7	26929.7	73319.4	38751.7	43698.3	74499.5	45788.7	23645.1	-0.305948	-0.0767896	-0.767494
sp|P09671|SODM_MOUSE	P09671	SODM_MOUSE	Sod2	Superoxide dismutase [Mn], mitochondrial	50983.6	35658.7	68935.7	37044.5	44191.8	62938	48928.7	27468.4	-0.306217	-0.0155645	-0.487771
sp|P55097|CATK_MOUSE	P55097	CATK_MOUSE	Ctsk	Cathepsin K	58476.6	29568.9	88418	37664.9	29400.8	79502.9	49290.8	23894.3	-0.306733	0.211319	-0.57343
sp|Q9Z0G0|GIPC1_MOUSE	Q9Z0G0	GIPC1_MOUSE	Gipc1	PDZ domain-containing protein GIPC1	55524.9	29438.4	119785	27919	31102.5	74024.3	39462.2	24903.6	-0.307221	0.490583	-0.707763
sp|P14685|PSMD3_MOUSE	P14685	PSMD3_MOUSE	Psmd3	26S proteasome non-ATPase regulatory subunit 3	44913.7	31441.7	111618	31477.6	37899.8	56588.3	41182.3	32230.7	-0.307401	0.598775	-0.364096
sp|Q9CQC7|NDUB4_MOUSE	Q9CQC7	NDUB4_MOUSE	Ndufb4	NADH dehydrogenase [ubiquinone] 1 beta subcomplex subunit 4	43515.6	39697	44419	40278.6	38980.8	64036.3	42585.1	43531.9	-0.30801	-0.282491	-0.258515
sp|Q9Z1Z2|STRAP_MOUSE	Q9Z1Z2	STRAP_MOUSE	Strap	Serine-threonine kinase receptor-associated protein	43963.9	37641.7	57851.6	38327.2	38193.3	62874.6	46177	42508.7	-0.308585	-0.0715328	-0.188551
sp|P11679|K2C8_MOUSE	P11679	K2C8_MOUSE	Krt8	Keratin, type II cytoskeletal 8	61406.8	25008	129415	21612.2	29103.2	77933.5	52049	22546.5	-0.308754	0.496708	-0.520946
sp|Q9WUD1|CHIP_MOUSE	Q9WUD1	CHIP_MOUSE	Stub1	STIP1 homology and U box-containing protein 1	36262	42439.8	64767.4	47722.1	45568.7	51944.4	46562.8	28740.3	-0.309199	0.206122	-0.372886
sp|Q64213|SF01_MOUSE	Q64213	SF01_MOUSE	Sf1	Splicing factor 1	33580.2	29539.6	49759.7	26770.6	33414.1	44798.9	64313.5	64325.7	-0.309314	-0.0313763	0.71785
sp|P52196|THTR_MOUSE	P52196	THTR_MOUSE	Tst	Thiosulfate sulfurtransferase	36684	42127.3	38660.3	49815.5	57049.7	40625.8	39364.2	38845.7	-0.309596	-0.142715	-0.320646
sp|P54071|IDHP_MOUSE	P54071	IDHP_MOUSE	Idh2	Isocitrate dehydrogenase [NADP], mitochondrial	25271.2	45690.3	32420.5	61993.9	55611.2	32390.6	21061.3	43212.3	-0.310497	0.101474	-0.453308
sp|Q91ZJ5|UGPA_MOUSE	Q91ZJ5	UGPA_MOUSE	Ugp2	UTP--glucose-1-phosphate uridylyltransferase	90304.6	18406.1	159790	33709	38855.5	95986.7	39467.9	13509.3	-0.310778	0.521057	-1.34783
sp|P63037|DNJA1_MOUSE	P63037	DNJA1_MOUSE	Dnaja1	DnaJ homolog subfamily A member 1	38579.5	41221.7	49189.8	43541.1	50650.6	48340	37586.9	41089.9	-0.310881	-0.094242	-0.331353
sp|Q8VCG3|WDR74_MOUSE	Q8VCG3	WDR74_MOUSE	Wdr74	WD repeat-containing protein 74	38129.5	32054.1	43669.1	37284.9	51237.7	35855	42442.4	47175.7	-0.311419	-0.10545	0.0412378
sp|Q9Z2U1|PSA5_MOUSE	Q9Z2U1	PSA5_MOUSE	Psma5	Proteasome subunit alpha type-5	58551.8	29086.3	93876.2	37803.6	34607.7	74154.1	43248.4	28645.7	-0.311542	0.275862	-0.597226
sp|Q8JZY4|MRRP3_MOUSE	Q8JZY4	MRRP3_MOUSE	Kiaa0391	Mitochondrial ribonuclease P protein 3	23947.5	46008.6	29569.7	55468.6	49446.9	37381.6	30015.6	42841.3	-0.311719	-0.030055	-0.253105
sp|P10649|GSTM1_MOUSE	P10649	GSTM1_MOUSE	Gstm1	Glutathione S-transferase Mu 1	31905.6	53341	40626.8	42297	53951.9	51860.2	24655.6	35310.7	-0.31179	-0.351646	-0.819281
sp|Q8C2E4|PTCD1_MOUSE	Q8C2E4	PTCD1_MOUSE	Ptcd1	Pentatricopeptide repeat-containing protein 1, mitochondrial	21564.9	45394.3	27942.1	59554.1	56467.5	26666.9	24258	44440.7	-0.312161	0.0737758	-0.275163
sp|O88958|GNPI1_MOUSE	O88958	GNPI1_MOUSE	Gnpda1	Glucosamine-6-phosphate isomerase 1	66329	30494.9	98639.4	40043.8	46205.9	74077.7	46969.7	23021.2	-0.313006	0.205352	-0.7812
sp|P35486|ODPA_MOUSE	P35486	ODPA_MOUSE	Pdha1	Pyruvate dehydrogenase E1 component subunit alpha, somatic form, mitochondrial	25192.8	46418.6	34228.3	59612.3	56521.2	32450.6	30935	41309.4	-0.313159	0.0768642	-0.300462
sp|Q9CQN1|TRAP1_MOUSE	Q9CQN1	TRAP1_MOUSE	Trap1	Heat shock protein 75 kDa, mitochondrial	19023.9	50105.5	24659.6	65886.1	62275.3	23621.3	19174.4	41088.2	-0.313303	0.0760451	-0.51134
sp|O08795|GLU2B_MOUSE	O08795	GLU2B_MOUSE	Prkcsh	Glucosidase 2 subunit beta	85431.8	25068.2	82660.6	42374.8	41158.7	96155.2	48338.6	17753.2	-0.313431	-0.13514	-1.05493
sp|P17950|IER2_MOUSE	P17950	IER2_MOUSE	Ier2	Immediate early response gene 2 protein	62205.7	25173.7	95852.5	30488.2	30087.6	78561.4	58544.4	26355.5	-0.31431	0.217644	-0.355841
sp|Q8BHN3|GANAB_MOUSE	Q8BHN3	GANAB_MOUSE	Ganab	Neutral alpha-glucosidase AB	59692.6	29414.7	78537.8	44642.4	41790.4	69057.7	42241	28822.5	-0.314969	0.152186	-0.641404
sp|Q9CR16|PPID_MOUSE	Q9CR16	PPID_MOUSE	Ppid	Peptidyl-prolyl cis-trans isomerase D	34784.8	42371.9	45387	49301.7	49454.7	46585.2	44094.7	37913.9	-0.315843	-0.0204422	-0.227859
sp|P80313|TCPH_MOUSE	P80313	TCPH_MOUSE	Cct7	T-complex protein 1 subunit eta	47274.7	34686.1	53175.5	43997.1	43101.2	59005.6	42267.8	42429	-0.317073	-0.0714577	-0.269702
sp|P99029|PRDX5_MOUSE	P99029	PRDX5_MOUSE	Prdx5	Peroxiredoxin-5, mitochondrial	75821.1	29135.1	113485	36497.8	44893.7	85902.2	49294.2	15075.7	-0.31753	0.197484	-1.02286
sp|Q8JZQ2|AFG32_MOUSE	Q8JZQ2	AFG32_MOUSE	Afg3l2	AFG3-like protein 2	33187.8	42652.2	40044.3	54791.1	52037.9	42492.7	33371	42635	-0.317823	0.00464418	-0.314669
sp|P17182|ENOA_MOUSE	P17182	ENOA_MOUSE	Eno1	Alpha-enolase	62400.6	30328.7	65671.4	41619.3	42317.3	73265.6	61265	22665.5	-0.31783	-0.107403	-0.461661
sp|Q9Z2H5-2|E41L1_MOUSE	Q9Z2H5-2	E41L1_MOUSE	Epb41l1	Isoform 2 of Band 4.1-like protein 1	51678.2	37202.6	90506.2	42184.9	33509.7	77338.3	36138.4	24311.9	-0.318641	0.259488	-0.874761
sp|P60867|RS20_MOUSE	P60867	RS20_MOUSE	Rps20	40S ribosomal protein S20	69529.6	27243	94223.9	39945.4	42626.8	78081.3	52565.9	23387	-0.318852	0.152532	-0.668346
sp|Q9D8U8|SNX5_MOUSE	Q9D8U8	SNX5_MOUSE	Snx5	Sorting nexin-5	45300.3	41188.2	76390.4	44019.8	42998.9	64889.9	36673.8	32213.3	-0.318965	0.158412	-0.647238
sp|Q8C525|M21D2_MOUSE	Q8C525	M21D2_MOUSE	Mb21d2	Protein MB21D2	66810.4	28066.2	99443.7	19336	35048.2	83343.2	56511.8	19501.3	-0.31944	0.00472424	-0.639244
sp|P50544|ACADV_MOUSE	P50544	ACADV_MOUSE	Acadvl	Very long-chain specific acyl-CoA dehydrogenase, mitochondrial	31850.8	47345.5	36230.6	54308.2	56527.7	42323.2	33265.9	37454.5	-0.31982	-0.126718	-0.483128
sp|Q99N95|RM03_MOUSE	Q99N95	RM03_MOUSE	Mrpl3	39S ribosomal protein L3, mitochondrial	16592.9	45490.4	33705.9	63180.4	58539	18982.1	21131.3	46998.7	-0.320382	0.321704	-0.186297
sp|Q99K70|RRAGC_MOUSE	Q99K70	RRAGC_MOUSE	Rragc	Ras-related GTP-binding protein C	19068.1	47594.2	17526.7	50029.5	59294	23956.5	23311.3	55486.4	-0.320588	-0.30137	-0.079306
sp|Q03265|ATPA_MOUSE	Q03265	ATPA_MOUSE	Atp5a1	ATP synthase subunit alpha, mitochondrial	43406.7	40047.3	49383.3	47970	46851	57374.4	35890.6	38168.2	-0.320653	-0.098404	-0.492962
sp|Q9R0H0|ACOX1_MOUSE	Q9R0H0	ACOX1_MOUSE	Acox1	Peroxisomal acyl-coenzyme A oxidase 1	68264.3	26046.7	95117.7	39630.1	37439.7	80372.5	61419.5	21471.9	-0.32099	0.193773	-0.507196
sp|O88342|WDR1_MOUSE	O88342	WDR1_MOUSE	Wdr1	WD repeat-containing protein 1	64442.2	33042.6	74811.6	36977.8	39401.1	82408.1	40352.7	33596.9	-0.321374	-0.123841	-0.720009
sp|Q8QZV7|ASUN_MOUSE	Q8QZV7	ASUN_MOUSE	Asun	Protein asunder homolog	31008	40837.3	41592.8	37721.6	34223.2	55568.1	47108.6	52904.2	-0.321682	-0.178992	0.155538
sp|Q9R0Q3|TMED2_MOUSE	Q9R0Q3	TMED2_MOUSE	Tmed2	Transmembrane emp24 domain-containing protein 2	51901.3	40197.6	66699.2	36447.8	41477.6	73696.2	60139.8	26491.3	-0.322557	-0.159111	-0.410856
sp|Q9CWM4|PFD1_MOUSE	Q9CWM4	PFD1_MOUSE	Pfdn1	Prefoldin subunit 1	72142.4	25081.4	106309	38121.4	32176.5	89446.5	40615.6	23900	-0.323034	0.24796	-0.914697
sp|Q9D892|ITPA_MOUSE	Q9D892	ITPA_MOUSE	Itpa	Inosine triphosphate pyrophosphatase	47874.5	35676.6	73828.2	42793.3	36062.6	68553.7	49123.8	30325.3	-0.324377	0.156726	-0.397006
sp|Q8C4J7|TBL3_MOUSE	Q8C4J7	TBL3_MOUSE	Tbl3	Transducin beta-like protein 3	24383.4	37686.2	21642.9	30826.2	52677.8	25053.4	35511.7	79082.7	-0.324606	-0.567027	0.559971
sp|Q8CCS6|PABP2_MOUSE	Q8CCS6	PABP2_MOUSE	Pabpn1	Polyadenylate-binding protein 2	47658.6	32941	56611.2	33451.5	42786.1	58186.9	43485.8	39412.7	-0.325126	-0.16497	-0.284552
sp|Q8R5H1|UBP15_MOUSE	Q8R5H1	UBP15_MOUSE	Usp15	Ubiquitin carboxyl-terminal hydrolase 15	36925.9	33913.6	72399.5	44783.7	46353.7	42446.7	37869.8	38758.3	-0.326013	0.400126	-0.212694
sp|Q9D819|IPYR_MOUSE	Q9D819	IPYR_MOUSE	Ppa1	Inorganic pyrophosphatase	62887.9	32451.9	84190.9	38347.1	39130.2	80419.8	63256.7	20499.1	-0.326463	0.0356149	-0.513354
sp|Q9QXX4|CMC2_MOUSE	Q9QXX4	CMC2_MOUSE	Slc25a13	Calcium-binding mitochondrial carrier protein Aralar2	26358.2	40361.5	37771.7	51739	48544.7	35145.6	25918.6	55193.8	-0.326946	0.0970011	-0.0451369
sp|Q61739|ITA6_MOUSE	Q61739	ITA6_MOUSE	Itga6	Integrin alpha-6	38742.6	45019.2	53050.1	40956.2	47831.1	57422.3	31487.3	38445.6	-0.329502	-0.163037	-0.589821
sp|Q91YJ5|IF2M_MOUSE	Q91YJ5	IF2M_MOUSE	Mtif2	Translation initiation factor IF-2, mitochondrial	15105.8	51988.1	21957.3	59364.6	63324.6	20989.3	21422.8	46876.1	-0.329589	-0.0521277	-0.303907
sp|Q99KI0|ACON_MOUSE	Q99KI0	ACON_MOUSE	Aco2	Aconitate hydratase, mitochondrial	44627.7	37600.5	53649.4	50933.4	53927	49414.6	30879.2	32792.7	-0.329716	0.0172245	-0.698694
sp|Q62168|K1H2_MOUSE	Q62168	K1H2_MOUSE	Krt32	Keratin, type I cuticular Ha2	18330.3	19315.5	450234	19624.8	11469.2	35868.8	16309	22059	-0.330506	3.31116	-0.303095
sp|Q8CCJ3|UFL1_MOUSE	Q8CCJ3	UFL1_MOUSE	Ufl1	E3 UFM1-protein ligase 1	35139.1	46438.8	43116.8	50121	48353	54255.8	32137	31220.3	-0.330904	-0.138167	-0.69557
sp|P51881|ADT2_MOUSE	P51881	ADT2_MOUSE	Slc25a5	ADP/ATP translocase 2	43130.5	38505	113564	33051.8	40127.9	62565.1	39808.6	32730.7	-0.331069	0.513704	-0.501504
sp|O35226|PSMD4_MOUSE	O35226	PSMD4_MOUSE	Psmd4	26S proteasome non-ATPase regulatory subunit 4	48819.9	38129.7	43262.6	48004.8	43981.5	65399.9	47896.1	32416.7	-0.331115	-0.261195	-0.445665
sp|Q9CPT4|CS010_MOUSE	Q9CPT4	CS010_MOUSE	D17Wsu104e	UPF0556 protein C19orf10 homolog	76201.1	29172	80712	37838	34626.1	97943.6	46412.6	26017.2	-0.331244	-0.161256	-0.872097
sp|P99026|PSB4_MOUSE	P99026	PSB4_MOUSE	Psmb4	Proteasome subunit beta type-4	67562.1	25263.5	98463.8	32657.7	35079	81739.1	48561.4	24016.3	-0.33167	0.166639	-0.686667
sp|O88456|CPNS1_MOUSE	O88456	CPNS1_MOUSE	Capns1	Calpain small subunit 1	71931.5	25438.2	113536	35015.5	37144.5	85403.7	41081.4	23779.1	-0.331805	0.277614	-0.917939
sp|P35831|PTN12_MOUSE	P35831	PTN12_MOUSE	Ptpn12	Tyrosine-protein phosphatase non-receptor type 12	38835.6	44640.2	53473.9	46664	43414.1	61682.5	25823.5	39078	-0.332286	-0.0697287	-0.695392
sp|Q9Z1J3|NFS1_MOUSE	Q9Z1J3	NFS1_MOUSE	Nfs1	Cysteine desulfurase, mitochondrial	22369.3	50087.1	29287.4	58081.7	52831.6	38394.1	29519.3	45918.6	-0.332328	-0.0623169	-0.274152
sp|Q8JZS9|RM48_MOUSE	Q8JZS9	RM48_MOUSE	Mrpl48	39S ribosomal protein L48, mitochondrial	34282	32802.4	127706	38834.4	35738	48726.1	27204.4	34491.3	-0.332362	0.97946	-0.45317
sp|Q9QYJ3|DNJB1_MOUSE	Q9QYJ3	DNJB1_MOUSE	Dnajb1	DnaJ homolog subfamily B member 1	60417.2	33190.3	99128.2	41072	43745	74174.4	45825.7	24277.5	-0.333105	0.249687	-0.75025
sp|P48722|HS74L_MOUSE	P48722	HS74L_MOUSE	Hspa4l	Heat shock 70 kDa protein 4L	53921.6	31595.2	71247.7	42795.6	36004.2	71726.5	66226.3	22326.9	-0.33315	0.082152	-0.282813
sp|Q9D3E6|STAG1_MOUSE	Q9D3E6	STAG1_MOUSE	Stag1	Cohesin subunit SA-1	52833.6	38125.5	69699.8	23820.2	35258.7	79344.8	55656.2	29780.3	-0.33336	-0.293304	-0.423726
sp|Q9R112|SQRD_MOUSE	Q9R112	SQRD_MOUSE	Sqrdl	Sulfide:quinone oxidoreductase, mitochondrial	82797.2	28316.6	89853	34494.6	45354.8	94711.7	41148	18001.4	-0.334074	-0.171733	-1.24368
sp|Q9CZD3|SYG_MOUSE	Q9CZD3	SYG_MOUSE	Gars	Glycine--tRNA ligase	23533.5	45581.4	28426.6	49521.5	57775	29376.2	36412.5	46474.1	-0.334523	-0.161007	-0.0723821
sp|Q61171|PRDX2_MOUSE	Q61171	PRDX2_MOUSE	Prdx2	Peroxiredoxin-2	56196.3	31394	78248.1	34521.6	38397.5	72065.9	43486.7	34363.7	-0.334725	0.0298108	-0.504791
sp|P05132|KAPCA_MOUSE	P05132	KAPCA_MOUSE	Prkaca	cAMP-dependent protein kinase catalytic subunit alpha	46263.2	39339.2	68054.6	43510.2	48159.3	59805.5	38058.6	32498.1	-0.334838	0.0473203	-0.613705
sp|P42128|FOXK1_MOUSE	P42128	FOXK1_MOUSE	Foxk1	Forkhead box protein K1	60313.2	32549.1	59864.4	38195.2	34871.2	82268.2	42142.6	29302.3	-0.335063	-0.256496	-0.713324
sp|Q9QYA2|TOM40_MOUSE	Q9QYA2	TOM40_MOUSE	Tomm40	Mitochondrial import receptor subunit TOM40 homolog	24657.3	38579.1	34963.6	45046.9	47874.5	31909.8	38728.1	57088.5	-0.33535	0.00408404	0.26417
sp|Q9Z1R2|BAG6_MOUSE	Q9Z1R2	BAG6_MOUSE	Bag6	Large proline-rich protein BAG6	25212.5	61122.7	33230.4	51820.7	58943.2	49994.9	16265.8	34705.6	-0.335489	-0.357106	-1.09575
sp|Q61598|GDIB_MOUSE	Q61598	GDIB_MOUSE	Gdi2	Rab GDP dissociation inhibitor beta	70359.8	26568.4	80706.1	42093.9	39052.6	83313.5	46820	22105.9	-0.336216	0.00510587	-0.828086
sp|Q7TPR4|ACTN1_MOUSE	Q7TPR4	ACTN1_MOUSE	Actn1	Alpha-actinin-1	71971.6	30363.2	71264	38700.7	39697.8	89557.7	41700.1	28840.2	-0.336929	-0.233185	-0.873706
sp|P09411|PGK1_MOUSE	P09411	PGK1_MOUSE	Pgk1	Phosphoglycerate kinase 1	65034.3	31935.7	82681.2	36075.3	39534.2	82956.5	49342	24148.7	-0.337062	-0.0446655	-0.737038
sp|P70335|ROCK1_MOUSE	P70335	ROCK1_MOUSE	Rock1	Rho-associated protein kinase 1	62666.8	32292.1	88917.3	36693.8	37795.6	82214.2	49011.3	26388.8	-0.337777	0.065813	-0.670513
sp|Q9JHW2|NIT2_MOUSE	Q9JHW2	NIT2_MOUSE	Nit2	Omega-amidase NIT2	76199	28004.9	91051.6	30685.3	41108.7	90591.4	34981	27180.9	-0.337845	-0.113489	-1.08315
tr|F8VQC1|F8VQC1_MOUSE	F8VQC1	F8VQC1_MOUSE	Srp72	Signal recognition particle subunit SRP72	43238.1	35634.8	70377.2	38902.2	41617.2	58177.4	35041.3	37490.3	-0.339431	0.130988	-0.46035
sp|Q9ESC8|AFF4_MOUSE	Q9ESC8	AFF4_MOUSE	Aff4	AF4/FMR2 family member 4	71007.1	31923.1	90442.9	15750.8	29673.8	100630	68356.4	17402.5	-0.340209	-0.295176	-0.603516
sp|Q8VDM4|PSMD2_MOUSE	Q8VDM4	PSMD2_MOUSE	Psmd2	26S proteasome non-ATPase regulatory subunit 2	35262.8	41675.6	39684.4	46900	53129.6	44274.3	31308.5	43316.5	-0.340277	-0.169872	-0.38432
sp|O35857|TIM44_MOUSE	O35857	TIM44_MOUSE	Timm44	Mitochondrial import inner membrane translocase subunit TIM44	27809.5	44003.7	29371.5	60399.7	53102.6	37829.6	28551.3	45285.3	-0.340542	-0.0185396	-0.300455
sp|Q91YE7|RBM5_MOUSE	Q91YE7	RBM5_MOUSE	Rbm5	RNA-binding protein 5	49869.5	27919.9	58259.1	23958.2	34859.9	63681.4	58106.3	50544.7	-0.341154	-0.261287	0.140902
sp|Q9D7N3|RT09_MOUSE	Q9D7N3	RT09_MOUSE	Mrps9	28S ribosomal protein S9, mitochondrial	24518.5	47571.7	32994.1	53495.6	64965.1	26367.7	24950.3	39227.1	-0.341328	-0.0786046	-0.509067
sp|Q63932|MP2K2_MOUSE	Q63932	MP2K2_MOUSE	Map2k2	Dual specificity mitogen-activated protein kinase kinase 2	45368.3	38205.5	62155	35667.3	36043.7	69869.5	69278.4	28675.5	-0.34176	-0.114647	-0.112708
sp|Q9CQR4|ACO13_MOUSE	Q9CQR4	ACO13_MOUSE	Acot13	Acyl-coenzyme A thioesterase 13	31940.3	47950.5	41690.6	51771.9	37989.3	63266.3	33758.2	47377.3	-0.3419	-0.115543	-0.319596
sp|P08030|APT_MOUSE	P08030	APT_MOUSE	Aprt	Adenine phosphoribosyltransferase	39570.8	46852.7	38240.1	45772.3	45822.7	63780.4	34535	35964.7	-0.342794	-0.383613	-0.636599
sp|P05784|K1C18_MOUSE	P05784	K1C18_MOUSE	Krt18	Keratin, type I cytoskeletal 18	48951.6	23348.2	92787	23319.7	30379.9	61326.2	47362	44592.1	-0.343029	0.340361	0.00389461
sp|Q3UCQ1|FOXK2_MOUSE	Q3UCQ1	FOXK2_MOUSE	Foxk2	Forkhead box protein K2	37967.9	16634.2	115576	25346.8	17597.4	51680.5	97524.6	47406.2	-0.34344	1.02443	1.0649
sp|Q61879|MYH10_MOUSE	Q61879	MYH10_MOUSE	Myh10	Myosin-10	51546.1	33356.5	55362.3	42501.3	37926.1	69858.3	44901.5	40350.3	-0.344269	-0.139304	-0.338347
sp|P20152|VIME_MOUSE	P20152	VIME_MOUSE	Vim	Vimentin	55531	25881.3	110943	37419.7	34126.6	69258.3	61203.5	31455.5	-0.344707	0.521099	-0.158023
sp|P14576|SRP54_MOUSE	P14576	SRP54_MOUSE	Srp54	Signal recognition particle 54 kDa protein	38599.1	46127.1	43947.9	50967	49087.9	58540.3	39113.3	32022.7	-0.345175	-0.18135	-0.597405
sp|P38647|GRP75_MOUSE	P38647	GRP75_MOUSE	Hspa9	Stress-70 protein, mitochondrial	28421.2	42991.3	62878	50323.3	53501.1	37271.4	28282.6	39095.3	-0.346077	0.318564	-0.429979
sp|Q9QZE5|COPG1_MOUSE	Q9QZE5	COPG1_MOUSE	Copg1	Coatomer subunit gamma-1	49175.5	41566.2	65931.2	46210.9	44277.3	71074.3	28215.6	29120.2	-0.346199	-0.0407108	-1.00853
sp|Q811I0|ATPF1_MOUSE	Q811I0	ATPF1_MOUSE	Atpaf1	ATP synthase mitochondrial F1 complex assembly factor 1	26281.8	45236	26343.3	65264	60180	30749.2	19914.5	46695	-0.346439	0.0107214	-0.449014
sp|Q8C4Q6|AIDA_MOUSE	Q8C4Q6	AIDA_MOUSE	Aida	Axin interactor, dorsalization-associated protein	55799.7	30117.2	96512.5	34122.7	39829.8	69469.7	41267.7	26896.4	-0.347274	0.257257	-0.681203
sp|Q60875|ARHG2_MOUSE	Q60875	ARHG2_MOUSE	Arhgef2	Rho guanine nucleotide exchange factor 2	36538.7	47074.5	46869.6	37456.6	44082.6	62294.1	37503.3	35230.3	-0.347379	-0.335128	-0.548487
sp|P97801|SMN_MOUSE	P97801	SMN_MOUSE	Smn1	Survival motor neuron protein	17429.8	24227.9	27114.4	21584.3	31223.7	21779.8	157814	66255.2	-0.347504	-0.122201	2.07979
sp|Q8R1Q8|DC1L1_MOUSE	Q8R1Q8	DC1L1_MOUSE	Dync1li1	Cytoplasmic dynein 1 light intermediate chain 1	50738.7	39549	46743.5	50297.3	38768	76215.2	42327.4	30509.5	-0.348822	-0.244759	-0.65868
sp|P14206|RSSA_MOUSE	P14206	RSSA_MOUSE	Rpsa	40S ribosomal protein SA	47108	33915.8	73852	41989.1	41652.4	61641.7	45774.7	31077.2	-0.350341	0.165389	-0.426605
sp|Q99KE1|MAOM_MOUSE	Q99KE1	MAOM_MOUSE	Me2	NAD-dependent malic enzyme, mitochondrial	29769.9	42950.3	42183.5	52796.6	54037.7	38702.7	29094.8	45217.3	-0.350841	0.0344266	-0.319601
sp|O35381|AN32A_MOUSE	O35381	AN32A_MOUSE	Anp32a	Acidic leucine-rich nuclear phosphoprotein 32 family member A	50919.7	31355.2	140317	31541.4	36420.5	68508.1	42820.1	22454.8	-0.350884	0.711814	-0.684806
sp|Q3UV17|K22O_MOUSE	Q3UV17	K22O_MOUSE	Krt76	Keratin, type II cytoskeletal 2 oral	52098.8	21854.6	93168.3	21086.2	28781.5	65595.8	52745.4	42566.2	-0.351825	0.275738	0.014212
sp|Q9D7B6|ACAD8_MOUSE	Q9D7B6	ACAD8_MOUSE	Acad8	Isobutyryl-CoA dehydrogenase, mitochondrial	30877.4	45784.7	35026.6	53210.8	47974.5	49941.5	37692.3	40284.4	-0.35303	-0.150155	-0.328502
sp|P08113|ENPL_MOUSE	P08113	ENPL_MOUSE	Hsp90b1	Endoplasmin	48533.1	36972	64338.5	47658.8	45323.8	63902.9	34155.3	33500.4	-0.353243	0.0361393	-0.691042
sp|Q9DCT8|CRIP2_MOUSE	Q9DCT8	CRIP2_MOUSE	Crip2	Cysteine-rich protein 2	62629.1	25902.4	70616.5	33292.7	36710.5	76437.1	49940.6	37322.4	-0.353943	-0.122882	-0.374763
sp|Q9D7S7|RL22L_MOUSE	Q9D7S7	RL22L_MOUSE	Rpl22l1	60S ribosomal protein L22-like 1	30783.2	37725.9	156614	34919.1	33237.5	54337.5	21604.1	26066.6	-0.354224	1.129	-0.877418
sp|Q2KN98|CYTSA_MOUSE	Q2KN98	CYTSA_MOUSE	Specc1l	Cytospin-A	58897.4	27213.4	102027	23343.5	36843.8	73275.1	46889.9	28454.8	-0.354796	0.187137	-0.547483
sp|P62827|RAN_MOUSE	P62827	RAN_MOUSE	Ran	GTP-binding nuclear protein Ran	47127.5	38376.7	56602.1	42224.5	47845.9	61599.8	39488.2	34742.1	-0.356149	-0.147245	-0.560135
sp|Q5F2E8|TAOK1_MOUSE	Q5F2E8	TAOK1_MOUSE	Taok1	Serine/threonine-protein kinase TAO1	52484.2	31419.3	40519.2	42817.2	45992.4	61422.1	48914.6	35496.6	-0.356385	-0.366169	-0.347681
sp|O54724|PTRF_MOUSE	O54724	PTRF_MOUSE	Ptrf	Polymerase I and transcript release factor	65816.5	33186.9	68723.6	35633.1	43418.6	83372.8	54005.2	27902.7	-0.356906	-0.280935	-0.630383
sp|Q61792|LASP1_MOUSE	Q61792	LASP1_MOUSE	Lasp1	LIM and SH3 domain protein 1	58608.9	31471.8	70496.6	40993	42862.4	72516.9	41857.2	28168.2	-0.357095	-0.0494767	-0.720435
sp|Q9JK81|MYG1_MOUSE	Q9JK81	MYG1_MOUSE	Myg1	UPF0160 protein MYG1, mitochondrial	63109	30642.3	69209.7	39911.9	37661.7	82482.3	53025.4	32108.7	-0.357855	-0.138829	-0.496956
sp|Q9R1P4|PSA1_MOUSE	Q9R1P4	PSA1_MOUSE	Psma1	Proteasome subunit alpha type-1	59233.9	26203.1	109346	33680.8	37910.8	71669.4	52832.5	24071.9	-0.359054	0.384302	-0.510848
sp|Q9JLJ2|AL9A1_MOUSE	Q9JLJ2	AL9A1_MOUSE	Aldh9a1	4-trimethylaminobutyraldehyde dehydrogenase	44245	41805.7	58677	48051.9	49004.3	61412	35318.3	30499.5	-0.359694	-0.0490024	-0.746402
sp|Q69ZH9|RHG23_MOUSE	Q69ZH9	RHG23_MOUSE	Arhgap23	Rho GTPase-activating protein 23	64645.5	26426	70910.4	25368.8	41315.7	75544.2	47103.2	22971.3	-0.359708	-0.279484	-0.737819
sp|P99024|TBB5_MOUSE	P99024	TBB5_MOUSE	Tubb5	Tubulin beta-5 chain	32776	46206.6	35905.5	57073.1	57949.7	43415.7	25323.5	34150.7	-0.359959	-0.124594	-0.76923
sp|P40142|TKT_MOUSE	P40142	TKT_MOUSE	Tkt	Transketolase	49222.8	26937.3	156023	32995.7	36345	61408.2	35324.1	22578.8	-0.360107	0.951314	-0.755506
sp|Q8C729|F126B_MOUSE	Q8C729	F126B_MOUSE	Fam126b	Protein FAM126B	67010.3	25248.5	89153.2	21420.4	35768.2	82652.6	55366.5	20902	-0.360163	-0.0989159	-0.634764
sp|Q9R1P1|PSB3_MOUSE	Q9R1P1	PSB3_MOUSE	Psmb3	Proteasome subunit beta type-3	56621	26381.7	102471	29388.7	44251.6	62417.9	36153.7	35561.4	-0.361918	0.305859	-0.572801
sp|Q9WVJ2|PSD13_MOUSE	Q9WVJ2	PSD13_MOUSE	Psmd13	26S proteasome non-ATPase regulatory subunit 13	49367.5	33845.7	68123.4	44120.3	43847.7	63138.8	34956.9	35020	-0.362544	0.0692051	-0.612479
sp|Q6PHZ2|KCC2D_MOUSE	Q6PHZ2	KCC2D_MOUSE	Camk2d	Calcium/calmodulin-dependent protein kinase type II subunit delta	65806.8	31532.9	62210.5	37774.1	54972.9	70179.3	40813.6	31339.4	-0.362585	-0.323907	-0.794553
sp|P00493|HPRT_MOUSE	P00493	HPRT_MOUSE	Hprt1	Hypoxanthine-guanine phosphoribosyltransferase	71578.9	28418.1	66923.5	35103.8	35034.6	93678.3	77083	20328.6	-0.3642	-0.335202	-0.401991
sp|Q8BMS1|ECHA_MOUSE	Q8BMS1	ECHA_MOUSE	Hadha	Trifunctional enzyme subunit alpha, mitochondrial	21144.4	48338.5	31753	60479.3	61106.8	28352.9	24504.6	41787.8	-0.364581	0.0440329	-0.432395
sp|O35855|BCAT2_MOUSE	O35855	BCAT2_MOUSE	Bcat2	Branched-chain-amino-acid aminotransferase, mitochondrial	14152.6	51431.4	23010.4	63386.8	61903.4	22554.8	17444.8	47334	-0.364892	0.0327483	-0.382716
sp|Q9D0R2|SYTC_MOUSE	Q9D0R2	SYTC_MOUSE	Tars	Threonine--tRNA ligase, cytoplasmic	53609.5	28521.1	104465	28706.7	40504.7	65275.1	48591.4	25055.9	-0.365073	0.33222	-0.52236
sp|Q8K4L4|POF1B_MOUSE	Q8K4L4	POF1B_MOUSE	Pof1b	Protein POF1B	50674	22881.4	80412.5	26997.9	25586.9	69159.1	55503.7	43656.1	-0.365234	0.180997	0.0656904
sp|O35114|SCRB2_MOUSE	O35114	SCRB2_MOUSE	Scarb2	Lysosome membrane protein 2	74853.3	24080.2	93660.6	34004.1	32698.7	94753	47757.4	19777.8	-0.365421	0.00240831	-0.91624
sp|Q80UU9|PGRC2_MOUSE	Q80UU9	PGRC2_MOUSE	Pgrmc2	Membrane-associated progesterone receptor component 2	59389.5	27508	102626	25884.2	36739.3	75239.8	54878.8	21859.6	-0.365843	0.198653	-0.545209
sp|Q8R3W7|AGR3_MOUSE	Q8R3W7	AGR3_MOUSE	Agr3	Anterior gradient protein 3 homolog	89339.8	23856.7	171628	34914.6	41697.2	104248	26257.9	12138.9	-0.366595	0.501016	-1.92637
sp|P62843|RS15_MOUSE	P62843	RS15_MOUSE	Rps15	40S ribosomal protein S15	50141	19818.6	213324	19479.7	35948.1	54252.9	44408	23557.6	-0.366621	1.3679	-0.408337
sp|Q99JW4|LIMS1_MOUSE	Q99JW4	LIMS1_MOUSE	Lims1	LIM and senescent cell antigen-like-containing domain protein 1	32867.7	44643	45986.9	50215.3	53807.4	46151.2	23594.8	38847	-0.366936	-0.0552617	-0.678819
sp|Q61768|KINH_MOUSE	Q61768	KINH_MOUSE	Kif5b	Kinesin-1 heavy chain	38627.9	46010.8	40223.5	50285.1	53284.2	55887.7	27795.1	35382.9	-0.367212	-0.270475	-0.789106
sp|P12388|PAI2_MOUSE	P12388	PAI2_MOUSE	Serpinb2	Plasminogen activator inhibitor 2, macrophage	60117	22542.7	77174.5	27340.1	48419	58215.2	46012.7	34625.3	-0.367414	-0.0289661	-0.403138
tr|E9PYH6|E9PYH6_MOUSE	E9PYH6	E9PYH6_MOUSE	Setd1a	Protein Setd1a	31749.1	41655.8	40915.3	38505.5	43966	50759.8	46160.6	46454.3	-0.367881	-0.254241	-0.0325128
sp|Q80X90|FLNB_MOUSE	Q80X90	FLNB_MOUSE	Flnb	Filamin-B	48128.1	34034.3	85552.7	38821.7	40283.8	65744.1	38120.9	37346.6	-0.367894	0.230245	-0.490518
sp|Q8BI08|MAL2_MOUSE	Q8BI08	MAL2_MOUSE	Mal2	Protein MAL2	61900.4	27482	116497	27439.9	41886.5	73662.8	38798.6	30468.3	-0.370445	0.316929	-0.73827
sp|P67871|CSK2B_MOUSE	P67871	CSK2B_MOUSE	Csnk2b	Casein kinase II subunit beta	62414.1	30584.1	99814.8	35495.7	42825.9	77411.8	59671.5	29137.1	-0.370614	0.170385	-0.437118
sp|P60670|NPL4_MOUSE	P60670	NPL4_MOUSE	Nploc4	Nuclear protein localization protein 4 homolog	36344.1	39824.4	49471.4	44451.6	42290.3	56224.3	35614	45701.9	-0.371141	-0.068859	-0.276799
sp|P84078|ARF1_MOUSE	P84078	ARF1_MOUSE	Arf1	ADP-ribosylation factor 1	52982.7	29167.8	114971	30205.4	34470.2	71815.4	49956.5	25138.4	-0.371604	0.449857	-0.501158
sp|Q8BMF4|ODP2_MOUSE	Q8BMF4	ODP2_MOUSE	Dlat	Dihydrolipoyllysine-residue acetyltransferase component of pyruvate dehydrogenase complex, mitochondrial	51617.8	33348.5	71419.4	47590.2	48837.8	61092.5	44210	32155.4	-0.371628	0.114488	-0.525599
sp|Q61026|NCOA2_MOUSE	Q61026	NCOA2_MOUSE	Ncoa2	Nuclear receptor coactivator 2	45946	25552.3	84336.1	32158.7	40453.3	52080.9	38826.4	33243.4	-0.372076	0.332208	-0.360592
sp|P62869|ELOB_MOUSE	P62869	ELOB_MOUSE	Tceb2	Transcription elongation factor B polypeptide 2	71109.7	25096.2	131431	36064.1	52617.2	71909	51061.2	18851.9	-0.372251	0.427672	-0.832814
sp|Q99JI6|RAP1B_MOUSE	Q99JI6	RAP1B_MOUSE	Rap1b	Ras-related protein Rap-1b	89193.5	31677.9	71326.4	33851.2	36448.8	120096	59376.5	12192.4	-0.373101	-0.573747	-1.12917
sp|Q3TCH7|CUL4A_MOUSE	Q3TCH7	CUL4A_MOUSE	Cul4a	Cullin-4A	47045.4	38210.8	28174.8	33489.2	25821.1	84618.8	60790	32388.8	-0.373386	-0.840762	-0.245188
sp|Q8K003|TMA7_MOUSE	Q8K003	TMA7_MOUSE	Tma7	Translation machinery-associated protein 7	62594.7	25408.6	103999	35432.7	33513.7	80548.6	74647.8	19331.2	-0.374191	0.289737	-0.279411
sp|Q6P5F9|XPO1_MOUSE	Q6P5F9	XPO1_MOUSE	Xpo1	Exportin-1	41913.5	39909.9	60330.3	34284.3	43602.6	62490.8	43889.1	36988.1	-0.374751	-0.165201	-0.391532
sp|Q99PM9|UCK2_MOUSE	Q99PM9	UCK2_MOUSE	Uck2	Uridine-cytidine kinase 2	47831	40265.6	46553.4	41962.1	31795.7	82590.2	73185.2	23155.7	-0.376751	-0.369907	-0.247689
sp|P17742|PPIA_MOUSE	P17742	PPIA_MOUSE	Ppia	Peptidyl-prolyl cis-trans isomerase A	66995.1	33150.9	76733.8	41687.1	43452.1	86617.3	44905.1	21750.7	-0.377177	-0.135357	-0.964479
sp|Q9D8N0|EF1G_MOUSE	Q9D8N0	EF1G_MOUSE	Eef1g	Elongation factor 1-gamma	48612.7	33338.2	53815.7	44050.4	42098	64413.9	48536	36996.7	-0.378183	-0.122133	-0.316467
sp|P51885|LUM_MOUSE	P51885	LUM_MOUSE	Lum	Lumican	79020	28923.6	87847.1	32351.6	58193.2	82141.2	53609.5	13418.4	-0.378591	-0.223448	-1.06603
sp|P60766|CDC42_MOUSE	P60766	CDC42_MOUSE	Cdc42	Cell division control protein 42 homolog	55564.5	20488.6	128162	28445.8	37395.9	61486.7	41709.6	23440.3	-0.378711	0.663365	-0.601956
sp|Q14CH7|SYAM_MOUSE	Q14CH7	SYAM_MOUSE	Aars2	Alanine--tRNA ligase, mitochondrial	15760.8	51058.7	25389.4	63628.4	60548.8	26422	20048.2	39374.6	-0.380261	0.0335644	-0.549514
tr|E9PVA8|E9PVA8_MOUSE	E9PVA8	E9PVA8_MOUSE	Gcn1l1	Protein Gcn1l1	43387.1	42041.5	69662.6	39294.4	46858.2	64339.2	37130.4	28335	-0.380332	-0.029364	-0.764319
sp|Q00612|G6PD1_MOUSE	Q00612	G6PD1_MOUSE	G6pdx	Glucose-6-phosphate 1-dehydrogenase X	69045.3	24252.1	135590	27806.9	36034.3	85466.9	51009.7	20722.4	-0.381061	0.427412	-0.760279
sp|Q01405|SC23A_MOUSE	Q01405	SC23A_MOUSE	Sec23a	Protein transport protein Sec23A	49558.5	37219.2	60122.9	42952.6	47045.7	66024.6	40189.8	35312	-0.381825	-0.133518	-0.582637
sp|Q9DBJ1|PGAM1_MOUSE	Q9DBJ1	PGAM1_MOUSE	Pgam1	Phosphoglycerate mutase 1	53844.4	38201.1	89584.1	17594.2	29386.2	90550.9	61373.1	21018.3	-0.381859	-0.162264	-0.541711
sp|O35129|PHB2_MOUSE	O35129	PHB2_MOUSE	Phb2	Prohibitin-2	58141.9	32975.8	71540.4	38809.6	39311.1	79473.2	44237.5	34343.7	-0.38254	-0.106259	-0.59609
sp|Q8VCW8|ACSF2_MOUSE	Q8VCW8	ACSF2_MOUSE	Acsf2	Acyl-CoA synthetase family member 2, mitochondrial	28011.1	46634.7	36397.7	51046.7	62179.3	35144.4	27864.2	39011.1	-0.38273	-0.154424	-0.541319
sp|P08249|MDHM_MOUSE	P08249	MDHM_MOUSE	Mdh2	Malate dehydrogenase, mitochondrial	59886.9	29930.6	67584.9	43983.8	43341	73763.8	53062.1	26522.1	-0.382731	-0.0698685	-0.557247
sp|Q99JT2|MST4_MOUSE	Q99JT2	MST4_MOUSE	Mst4	Serine/threonine-protein kinase MST4	45273.1	41053.8	56879.6	47404.6	49019.6	63560.3	37243.4	32168.6	-0.383065	-0.110428	-0.697694
tr|G3X9Z4|G3X9Z4_MOUSE	G3X9Z4	G3X9Z4_MOUSE	Pcf11	Cleavage and polyadenylation factor subunit homolog (S. cerevisiae)	38650.3	32460.9	62676.6	27438.6	30548.1	62190.5	61343.6	49437.1	-0.383092	-0.0413988	0.256465
sp|P08003|PDIA4_MOUSE	P08003	PDIA4_MOUSE	Pdia4	Protein disulfide-isomerase A4	72916.6	28859.4	88877.9	42134.1	42050.9	90801.3	45469.1	22143.2	-0.384424	-0.0201231	-0.974465
sp|Q9CVB6|ARPC2_MOUSE	Q9CVB6	ARPC2_MOUSE	Arpc2	Actin-related protein 2/3 complex subunit 2	51911.6	32631.4	64714.6	36574.4	38606.9	71820.2	44874.4	34399.8	-0.385337	-0.124616	-0.478171
sp|Q64433|CH10_MOUSE	Q64433	CH10_MOUSE	Hspe1	10 kDa heat shock protein, mitochondrial	74793.5	29430.3	99570.7	41229.8	49828.5	86306.5	39559.4	15302.6	-0.385354	0.0486142	-1.31116
sp|Q8BFR5|EFTU_MOUSE	Q8BFR5	EFTU_MOUSE	Tufm	Elongation factor Tu, mitochondrial	22827.7	45981.4	30437.9	67119.7	57481.1	32415.8	25155	39728.3	-0.38567	0.117984	-0.470423
sp|Q8K2T1|NMRL1_MOUSE	Q8K2T1	NMRL1_MOUSE	Nmral1	NmrA-like family domain-containing protein 1	13105.8	55815	22677	51244.7	65164.8	24884.6	18244.4	44087.1	-0.385779	-0.284719	-0.530756
sp|Q9DCN2|NB5R3_MOUSE	Q9DCN2	NB5R3_MOUSE	Cyb5r3	NADH-cytochrome b5 reductase 3	25756.8	43869.6	30002.5	54766	60628.9	30351.5	25393.5	46534.8	-0.385919	-0.102027	-0.338996
sp|P80316|TCPE_MOUSE	P80316	TCPE_MOUSE	Cct5	T-complex protein 1 subunit epsilon	45623.8	30860.2	69725.7	38250.2	39403.9	60602.3	38657.7	46191.7	-0.386859	0.11062	-0.237113
sp|P27546|MAP4_MOUSE	P27546	MAP4_MOUSE	Map4	Microtubule-associated protein 4	55582.6	40512.5	48343.6	41782.3	30294.7	95356.3	62571.6	24381	-0.386888	-0.479409	-0.531122
sp|O54734|OST48_MOUSE	O54734	OST48_MOUSE	Ddost	Dolichyl-diphosphooligosaccharide--protein glycosyltransferase 48 kDa subunit	62250.5	30666.6	68075.7	38456.5	46438.5	75065.7	45755.1	29703.1	-0.386992	-0.189718	-0.687257
sp|Q8CHT0|AL4A1_MOUSE	Q8CHT0	AL4A1_MOUSE	Aldh4a1	Delta-1-pyrroline-5-carboxylate dehydrogenase, mitochondrial	21871.4	47315.4	29249.8	61134.3	60400.8	30094.7	23563.2	41396.7	-0.387348	-0.00177729	-0.478296
sp|Q8JZN5|ACAD9_MOUSE	Q8JZN5	ACAD9_MOUSE	Acad9	Acyl-CoA dehydrogenase family member 9, mitochondrial	20637.1	45888.2	25590.5	60507.4	56444.8	30588.7	24815.5	47454.1	-0.387669	-0.0155931	-0.268184
sp|P48972|MYBB_MOUSE	P48972	MYBB_MOUSE	Mybl2	Myb-related protein B	62957.8	30450.3	54820.7	32799.7	51088.7	71144.1	37364.7	28262	-0.388011	-0.480291	-0.897277
sp|Q99L47|F10A1_MOUSE	Q99L47	F10A1_MOUSE	St13	Hsc70-interacting protein	77860.4	26190.7	81691.9	36885.5	39680.5	96669.8	59125.4	19455.2	-0.390027	-0.201489	-0.795073
sp|Q60605|MYL6_MOUSE	Q60605	MYL6_MOUSE	Myl6	Myosin light polypeptide 6	75305.5	23631	133023	33461.3	40703.3	88990.6	38068.4	20067.2	-0.390537	0.360271	-1.15762
sp|Q9D7S9|CHMP5_MOUSE	Q9D7S9	CHMP5_MOUSE	Chmp5	Charged multivesicular body protein 5	61237.9	28761.7	91247.5	21209.1	33016.2	85024.3	54405.7	18720.1	-0.391289	-0.0699125	-0.690829
sp|Q9DB25|ALG5_MOUSE	Q9DB25	ALG5_MOUSE	Alg5	Dolichyl-phosphate beta-glucosyltransferase	53383.3	39606.5	59520	35863	45950.1	76113	44525.5	33216.1	-0.392483	-0.355824	-0.650869
sp|Q8BWT1|THIM_MOUSE	Q8BWT1	THIM_MOUSE	Acaa2	3-ketoacyl-CoA thiolase, mitochondrial	27047.7	45710.5	42118.5	58335	51884.4	43643.1	31945	39899.9	-0.392806	0.0725402	-0.41103
sp|P27773|PDIA3_MOUSE	P27773	PDIA3_MOUSE	Pdia3	Protein disulfide-isomerase A3	88385.7	26525.8	80367.1	39773.9	44258.4	106673	44502.4	16992.6	-0.393372	-0.329166	-1.29535
sp|Q9EQH3|VPS35_MOUSE	Q9EQH3	VPS35_MOUSE	Vps35	Vacuolar protein sorting-associated protein 35	46114.2	37711.9	72791.6	38840	42097.8	68008	43739	36895.8	-0.393419	0.0198551	-0.449415
sp|Q6PAM1|TXLNA_MOUSE	Q6PAM1	TXLNA_MOUSE	Txlna	Alpha-taxilin	74736.9	22702.3	82728.5	33567.2	37527.7	90459.7	60689.6	28344.4	-0.393427	-0.138204	-0.523574
sp|Q9Z2U0|PSA7_MOUSE	Q9Z2U0	PSA7_MOUSE	Psma7	Proteasome subunit alpha type-7	57776.8	24374.8	87466.9	35002.6	37069.3	70869.6	50168.9	30347.3	-0.393854	0.182208	-0.422862
sp|Q6P8I4|PCNP_MOUSE	Q6P8I4	PCNP_MOUSE	Pcnp	PEST proteolytic signal-containing nuclear protein	25711.3	13879	24326.8	16656.1	19491.6	32540.1	49608.3	129857	-0.39424	-0.344365	1.78625
sp|P57759|ERP29_MOUSE	P57759	ERP29_MOUSE	Erp29	Endoplasmic reticulum resident protein 29	88925.9	22384.6	99515.4	32503.3	46386.4	100138	45287.8	15897	-0.396548	-0.150394	-1.25989
sp|Q8K3J1|NDUS8_MOUSE	Q8K3J1	NDUS8_MOUSE	Ndufs8	NADH dehydrogenase [ubiquinone] iron-sulfur protein 8, mitochondrial	65033.8	36292.2	59668.2	40381.4	53824.5	79593.1	42852.1	20028.4	-0.396944	-0.415235	-1.08526
sp|Q02257|PLAK_MOUSE	Q02257	PLAK_MOUSE	Jup	Junction plakoglobin	54244.4	20862.2	92155.3	21855.5	35960.4	62953.9	45076.2	44433.8	-0.397239	0.20492	-0.144131
sp|Q811S7|UBIP1_MOUSE	Q811S7	UBIP1_MOUSE	Ubp1	Upstream-binding protein 1	19392.7	46714.1	20281.1	54229.3	55062.8	32017.4	30542.8	49639.7	-0.397548	-0.224904	-0.119057
sp|Q3TQB2|FXRD1_MOUSE	Q3TQB2	FXRD1_MOUSE	Foxred1	FAD-dependent oxidoreductase domain-containing protein 1	21467.6	44893.8	32604.2	62514.4	59975	27447.2	29354.8	40122.9	-0.397656	0.121727	-0.331451
tr|G3X9N6|G3X9N6_MOUSE	G3X9N6	G3X9N6_MOUSE	Osbpl8	Oxysterol-binding protein	48600.4	23448.6	86380	31917.6	36706.5	58233.1	47916.6	33867	-0.398032	0.31734	-0.215197
sp|P09103|PDIA1_MOUSE	P09103	PDIA1_MOUSE	P4hb	Protein disulfide-isomerase	81594.7	26357.9	96525.6	42416.5	40609.2	101646	41375.7	16095.2	-0.398082	-0.033997	-1.30758
sp|P54227|STMN1_MOUSE	P54227	STMN1_MOUSE	Stmn1	Stathmin	75152.5	27800	86198.7	32760.5	42210.8	93504.6	66025	17498.2	-0.398605	-0.190117	-0.700334
sp|Q8K3H0|DP13A_MOUSE	Q8K3H0	DP13A_MOUSE	Appl1	DCC-interacting protein 13-alpha	55584.4	25405.2	109535	24785	32689.7	74144.1	59810.2	24302.1	-0.399559	0.330302	-0.34498
sp|Q9CPY7|AMPL_MOUSE	Q9CPY7	AMPL_MOUSE	Lap3	Cytosol aminopeptidase	19000	47838.3	30514.1	62073.3	61017.5	27151.2	21059.7	42633	-0.39959	0.0705512	-0.469137
sp|Q3TCN2|PLBL2_MOUSE	Q3TCN2	PLBL2_MOUSE	Plbd2	Putative phospholipase B-like 2	48271.8	31342.2	105114	37338.6	34512.7	70522	50243.2	28593.3	-0.399772	0.439617	-0.413929
sp|Q921Y0|MOB1A_MOUSE	Q921Y0	MOB1A_MOUSE	Mob1a	MOB kinase activator 1A	57948.1	28928.7	108731	29462	37999.9	76714.7	47379.1	23531.6	-0.401005	0.268637	-0.693973
sp|P62852|RS25_MOUSE	P62852	RS25_MOUSE	Rps25	40S ribosomal protein S25	79221.8	26521.1	104293	37708.6	38818.9	100842	46958.1	19488.6	-0.401372	0.0239786	-1.07166
sp|Q7TQI3|OTUB1_MOUSE	Q7TQI3	OTUB1_MOUSE	Otub1	Ubiquitin thioesterase OTUB1	62404.7	33778.7	87532.6	36479.9	45577.2	81490.1	46311.1	24823.6	-0.401733	-0.0351074	-0.836969
sp|O35685|NUDC_MOUSE	O35685	NUDC_MOUSE	Nudc	Nuclear migration protein nudC	68902.9	27817	67954	42153.1	43481.8	84328.6	63901.9	19034.3	-0.40212	-0.215099	-0.623933
sp|P57776|EF1D_MOUSE	P57776	EF1D_MOUSE	Eef1d	Elongation factor 1-delta	75432.9	27308.9	126516	36060.1	38586.3	97186.6	39989.9	18717.8	-0.402172	0.259917	-1.20957
sp|Q62433|NDRG1_MOUSE	Q62433	NDRG1_MOUSE	Ndrg1	Protein NDRG1	47562	27831.3	60566.7	37335.9	40923.9	58716.5	80920.4	26003.2	-0.402293	-0.0253823	0.101778
sp|Q07417|ACADS_MOUSE	Q07417	ACADS_MOUSE	Acads	Short-chain specific acyl-CoA dehydrogenase, mitochondrial	14472.4	52135.1	21223.8	59151.7	64661.7	23407.6	18227	48870.9	-0.402955	-0.131881	-0.39237
sp|Q4QQM4|P5I11_MOUSE	Q4QQM4	P5I11_MOUSE	Trp53i11	Tumor protein p53-inducible protein 11	56856.6	27291.4	72469.8	26918.1	33755.2	77512.6	43225.7	24431.5	-0.403036	-0.162894	-0.717723
sp|Q9CYZ2|TPD54_MOUSE	Q9CYZ2	TPD54_MOUSE	Tpd52l2	Tumor protein D54	69166.5	28521.1	117727	37078.4	42048.2	87124	36493.7	20939	-0.403048	0.26116	-1.16935
sp|Q08093|CNN2_MOUSE	Q08093	CNN2_MOUSE	Cnn2	Calponin-2	49486.5	34317	58089	36773.4	40330.2	70513.9	43960.1	43284	-0.403449	-0.224624	-0.345402
sp|Q9CQM9|GLRX3_MOUSE	Q9CQM9	GLRX3_MOUSE	Glrx3	Glutaredoxin-3	21984.1	48999	34956.3	49288.7	60041.4	33961.9	24348.7	37281.3	-0.405235	-0.15812	-0.609077
sp|E9Q557|DESP_MOUSE	E9Q557	DESP_MOUSE	Dsp	Desmoplakin	57349.7	19068.3	93448.1	21139.2	38958.6	62263.6	56848.3	39330.9	-0.405541	0.178922	-0.0737292
sp|O08749|DLDH_MOUSE	O08749	DLDH_MOUSE	Dld	Dihydrolipoyl dehydrogenase, mitochondrial	57566.8	32878.2	82537.6	40834.2	46265.9	73595.1	47583.3	25215.8	-0.406248	0.0416513	-0.719369
sp|Q8BH24|TM9S4_MOUSE	Q8BH24	TM9S4_MOUSE	Tm9sf4	Transmembrane 9 superfamily member 4	54015.9	25150.6	60508.1	36539.2	31576.1	73430	62932.7	31757.1	-0.40751	-0.113713	-0.149191
sp|Q91VD9|NDUS1_MOUSE	Q91VD9	NDUS1_MOUSE	Ndufs1	NADH-ubiquinone oxidoreductase 75 kDa subunit, mitochondrial	22567.4	49664	30115.5	57646.3	62674.1	33145.7	21773.2	42568.7	-0.407697	-0.12673	-0.574565
sp|O88544|CSN4_MOUSE	O88544	CSN4_MOUSE	Cops4	COP9 signalosome complex subunit 4	57571.7	37707.3	53815.7	40975.5	42888.1	83535.1	53022.7	25765.4	-0.408031	-0.415438	-0.682212
sp|P67984|RL22_MOUSE	P67984	RL22_MOUSE	Rpl22	60S ribosomal protein L22	44840.3	22436.9	133808	29402.4	31116	58158.2	37246.9	23414.5	-0.408126	0.870417	-0.557464
sp|Q93092|TALDO_MOUSE	Q93092	TALDO_MOUSE	Taldo1	Transaldolase	74435.8	30143.6	74945.9	41999	30255.6	108521	57968.4	11945	-0.408164	-0.246934	-0.989123
sp|Q8BSY0|ASPH_MOUSE	Q8BSY0	ASPH_MOUSE	Asph	Aspartyl/asparaginyl beta-hydroxylase	68382	26134.4	124831	45233.3	45984.3	79460.2	32209.5	19383.6	-0.408412	0.439027	-1.2818
sp|Q9CPV4|GLOD4_MOUSE	Q9CPV4	GLOD4_MOUSE	Glod4	Glyoxalase domain-containing protein 4	60276.1	33462.1	72775.3	36340.9	41798.2	82619.3	56236.9	23243.3	-0.408481	-0.189324	-0.646523
sp|Q62159|RHOC_MOUSE	Q62159	RHOC_MOUSE	Rhoc	Rho-related GTP-binding protein RhoC	88526.1	27372.6	89542.5	35670.3	46434.2	107421	37867.4	18577.1	-0.408708	-0.29719	-1.44667
sp|P63001|RAC1_MOUSE	P63001	RAC1_MOUSE	Rac1	Ras-related C3 botulinum toxin substrate 1	78975.7	16999.6	53009.9	33747.3	30761.2	96685.8	52231.5	23931.2	-0.409163	-0.554844	-0.742741
sp|P18155|MTDC_MOUSE	P18155	MTDC_MOUSE	Mthfd2	Bifunctional methylenetetrahydrofolate dehydrogenase/cyclohydrolase, mitochondrial	14815.1	49434.7	19938.7	67428.7	64639.5	20697.5	17676.5	46335.9	-0.409478	0.0339238	-0.414819
sp|O54879|HMGB3_MOUSE	O54879	HMGB3_MOUSE	Hmgb3	High mobility group protein B3	61143.7	28630.8	71820	32138.6	32981.1	86307.6	81028.8	25437	-0.41008	-0.198448	-0.164067
sp|Q9R062|GLYG_MOUSE	Q9R062	GLYG_MOUSE	Gyg1	Glycogenin-1	66077.4	26253.6	111538	26075.1	38972.9	83715.7	51884.3	27136.6	-0.410115	0.165613	-0.634695
sp|Q9DBZ5|EIF3K_MOUSE	Q9DBZ5	EIF3K_MOUSE	Eif3k	Eukaryotic translation initiation factor 3 subunit K	64350.7	26597.7	72458.3	28074.3	48199.4	72749.8	41364.8	24113.4	-0.411282	-0.266738	-0.885316
sp|Q99JB2|STML2_MOUSE	Q99JB2	STML2_MOUSE	Stoml2	Stomatin-like protein 2, mitochondrial	43869.7	37886.3	56014.5	38618.6	36098.4	72684.1	65095.7	31458.9	-0.412048	-0.201028	-0.172027
sp|Q99LX0|PARK7_MOUSE	Q99LX0	PARK7_MOUSE	Park7	Protein DJ-1	88186.9	21789.2	89188.4	34448.4	38599.4	107751	53292.8	14949.1	-0.412236	-0.243317	-1.1007
sp|A2A9F4|CA172_MOUSE	A2A9F4	CA172_MOUSE	ENSMUSG00000037600	n/a	72085.2	26611.9	78354.4	23113.7	39374.7	92015.9	56805.6	19501.6	-0.412782	-0.372837	-0.783971
sp|P11499|HS90B_MOUSE	P11499	HS90B_MOUSE	Hsp90ab1	Heat shock protein HSP 90-beta	44323.5	31763.2	108007	37380.8	42980.1	58400.3	37882	28737.2	-0.414061	0.520125	-0.60577
sp|P18242|CATD_MOUSE	P18242	CATD_MOUSE	Ctsd	Cathepsin D	80524.3	22894.3	93568.5	38624.2	36923.2	100880	46898	23444.4	-0.414112	-0.0599651	-0.970143
sp|Q03958|PFD6_MOUSE	Q03958	PFD6_MOUSE	Pfdn6	Prefoldin subunit 6	74525.7	26837.2	79327.3	40116.7	39596.4	95475.3	51478	21951.4	-0.414195	-0.177391	-0.879297
sp|P20065|TYB4_MOUSE	P20065	TYB4_MOUSE	Tmsb4x	Thymosin beta-4	73311	25497.5	118035	33920.6	36770.8	95049.7	42993.5	25735	-0.415869	0.205079	-0.939594
sp|Q9Z2I9|SUCB1_MOUSE	Q9Z2I9	SUCB1_MOUSE	Sucla2	Succinyl-CoA ligase [ADP-forming] subunit beta, mitochondrial	19672.6	46435.4	28920.8	68218.3	61773.6	26519.9	19135.9	42521.5	-0.417481	0.137744	-0.518033
sp|Q91Z53|GRHPR_MOUSE	Q91Z53	GRHPR_MOUSE	Grhpr	Glyoxylate reductase/hydroxypyruvate reductase	68839.9	31915.4	65146.1	32472.3	40801	93844.7	60925.1	23736.1	-0.418313	-0.463944	-0.669396
sp|Q64727|VINC_MOUSE	Q64727	VINC_MOUSE	Vcl	Vinculin	60878.6	26603.3	107930	31067.2	37484.7	79428.6	51048.4	24013.1	-0.418383	0.249615	-0.639294
sp|O88448|KLC2_MOUSE	O88448	KLC2_MOUSE	Klc2	Kinesin light chain 2	62756.8	31757.6	80197.5	39279.5	34505.3	91808.1	43931.7	25378.2	-0.418401	-0.080275	-0.865874
sp|Q6JPI3|MD13L_MOUSE	Q6JPI3	MD13L_MOUSE	Med13l	Mediator of RNA polymerase II transcription subunit 13-like	63122.7	21843.4	95700.2	26421.7	41643.7	71968	46444.4	25210.3	-0.419152	0.10421	-0.664978
sp|Q9EP72|EMC7_MOUSE	Q9EP72	EMC7_MOUSE	Emc7	ER membrane protein complex subunit 7	56161.9	24571.9	66068.7	31401.9	33846.6	74130	121162	22811.1	-0.419474	-0.147681	0.415077
sp|P62301|RS13_MOUSE	P62301	RS13_MOUSE	Rps13	40S ribosomal protein S13	70966.7	30387.7	93788.4	41439.2	41960	93693.9	48897.5	20568.3	-0.420522	-0.00454143	-0.965556
sp|Q6NZB0|DNJC8_MOUSE	Q6NZB0	DNJC8_MOUSE	Dnajc8	DnaJ homolog subfamily C member 8	64261.3	30792.5	53144.8	32197.1	39516.3	87821.5	73917	28388.4	-0.421846	-0.577335	-0.315778
sp|Q8K0D5|EFGM_MOUSE	Q8K0D5	EFGM_MOUSE	Gfm1	Elongation factor G, mitochondrial	15112.5	50119.5	22010.9	61879.3	62563.6	24903.2	18757.4	47197.6	-0.423157	-0.060234	-0.407254
sp|Q8VDD5|MYH9_MOUSE	Q8VDD5	MYH9_MOUSE	Myh9	Myosin-9	45426.6	32101.8	67677.8	39564.5	39595.8	64380	39876.4	38958.3	-0.423451	0.0446269	-0.399344
sp|P20108|PRDX3_MOUSE	P20108	PRDX3_MOUSE	Prdx3	Thioredoxin-dependent peroxide reductase, mitochondrial	78186.4	26720.9	76531.3	38485.6	40470.5	100300	52199.5	20733.2	-0.424233	-0.291502	-0.94871
sp|Q99KV1|DJB11_MOUSE	Q99KV1	DJB11_MOUSE	Dnajb11	DnaJ homolog subfamily B member 11	58693.1	33751.9	53940.7	40177.8	40112.8	84028.8	43177.6	33788.9	-0.425319	-0.399436	-0.689683
sp|P35492|HUTH_MOUSE	P35492	HUTH_MOUSE	Hal	Histidine ammonia-lyase	52752.3	23484.7	111166	28317.7	34001.9	68382.7	42882.7	28188.1	-0.425435	0.446099	-0.526671
sp|P11031|TCP4_MOUSE	P11031	TCP4_MOUSE	Sub1	Activated RNA polymerase II transcriptional coactivator p15	59577.2	33027.6	66251.1	37386.2	33545.3	90899.8	55937.3	30686.3	-0.426351	-0.263967	-0.522678
sp|P53564|CUX1_MOUSE	P53564	CUX1_MOUSE	Cux1	Homeobox protein cut-like 1	74158.7	18520.1	85530.9	18644.3	43370.2	81289	47890.7	19164.9	-0.427678	-0.258978	-0.894559
sp|Q8CFA2|GCST_MOUSE	Q8CFA2	GCST_MOUSE	Amt	Aminomethyltransferase, mitochondrial	19563.4	48426.8	32351.2	58354.3	62868.3	28696.6	23022.8	44017.5	-0.429468	-0.0136047	-0.449768
sp|P08207|S10AA_MOUSE	P08207	S10AA_MOUSE	S100a10	Protein S100-A10	72936.5	21956.9	83971.4	32681.8	43533.8	84312.1	45980.2	23828.8	-0.430028	-0.13218	-0.872921
sp|Q64521|GPDM_MOUSE	Q64521	GPDM_MOUSE	Gpd2	Glycerol-3-phosphate dehydrogenase, mitochondrial	44442.2	37479.7	35713.8	37307.7	46776.8	63638	32948.2	49901.1	-0.430612	-0.596541	-0.414372
sp|Q9EQ20|MMSA_MOUSE	Q9EQ20	MMSA_MOUSE	Aldh6a1	Methylmalonate-semialdehyde dehydrogenase [acylating], mitochondrial	23928.2	44855.8	39410.9	57525.1	56537.1	36307.6	24462.9	40697.8	-0.432747	0.0622127	-0.510818
sp|Q99LC5|ETFA_MOUSE	Q99LC5	ETFA_MOUSE	Etfa	Electron transfer flavoprotein subunit alpha, mitochondrial	21290.6	45698.7	25890.8	67211.5	65504.6	24952.4	22277.5	41644.1	-0.433302	0.0415837	-0.500929
tr|F6VG99|F6VG99_MOUSE	F6VG99	F6VG99_MOUSE	Lmo7	Protein Lmo7 (Fragment)	60400.3	33719.6	67506.7	43695.3	36548.1	90548.4	41105.5	29903.2	-0.433353	-0.192741	-0.839855
tr|E9Q3L2|E9Q3L2_MOUSE	E9Q3L2	E9Q3L2_MOUSE	Pi4ka	Protein Pi4ka	66430.2	33208.3	83262	15510.2	41657.6	92918.3	63236.5	12192.4	-0.433644	-0.446241	-0.83523
sp|Q5XJY5|COPD_MOUSE	Q5XJY5	COPD_MOUSE	Arcn1	Coatomer subunit delta	44942.3	34287.9	79423	40934.5	41376.3	65685.5	36197.5	32424.5	-0.434321	0.168882	-0.6417
sp|P62071|RRAS2_MOUSE	P62071	RRAS2_MOUSE	Rras2	Ras-related protein R-Ras2	26572.6	43312.1	46347	44804.9	40932.7	53523.2	49313.8	37818.2	-0.434664	-0.0513677	-0.116437
sp|Q99LJ1|FUCO_MOUSE	Q99LJ1	FUCO_MOUSE	Fuca1	Tissue alpha-L-fucosidase	50070.3	26604.3	88691.1	30120.8	34925.7	68849.5	59639.3	30115.3	-0.436641	0.195218	-0.209403
sp|Q6P8K8|CBPA4_MOUSE	Q6P8K8	CBPA4_MOUSE	Cpa4	Carboxypeptidase A4	53943.5	19932.7	95789.7	34541.7	31651.9	68438.9	50534	29348.3	-0.438128	0.380875	-0.325361
sp|Q91WQ3|SYYC_MOUSE	Q91WQ3	SYYC_MOUSE	Yars	Tyrosine--tRNA ligase, cytoplasmic	55150.6	32234.6	66601.7	40101.6	40708.8	77754.5	64988	26437.9	-0.438981	-0.150836	-0.373764
sp|Q8K1R3|PNPT1_MOUSE	Q8K1R3	PNPT1_MOUSE	Pnpt1	Polyribonucleotide nucleotidyltransferase 1, mitochondrial	17922.7	47853.4	21978.9	57433.2	61745.8	27492.2	23796.3	47593.1	-0.440095	-0.168298	-0.321947
sp|P70297|STAM1_MOUSE	P70297	STAM1_MOUSE	Stam	Signal transducing adapter molecule 1	39018.9	45726.8	52430.4	44143.9	45747	69274.1	28318.1	35798.1	-0.440685	-0.252188	-0.843138
sp|Q9R1T4|SEPT6_MOUSE	Q9R1T4	SEPT6_MOUSE	42253	Septin-6	60373.5	34954.8	90297.9	38031.3	51689.5	77707.3	27872.9	25967.5	-0.440824	-0.0119528	-1.26504
sp|Q9JHU4|DYHC1_MOUSE	Q9JHU4	DYHC1_MOUSE	Dync1h1	Cytoplasmic dynein 1 heavy chain 1	33164.7	43722.2	38940.1	46104.6	48170.1	56234.3	31137.6	37979.9	-0.441375	-0.29589	-0.595059
sp|Q9ES97|RTN3_MOUSE	Q9ES97	RTN3_MOUSE	Rtn3	Reticulon-3	53377.5	31443.5	81660.8	36980	37891.7	77294.8	45317.3	28361.5	-0.441476	0.0426292	-0.644648
sp|Q01853|TERA_MOUSE	Q01853	TERA_MOUSE	Vcp	Transitional endoplasmic reticulum ATPase	59777.3	30550.7	91755.7	32918.3	36878.1	85844.9	60848.6	25031.9	-0.442159	0.0227567	-0.515002
sp|P63017|HSP7C_MOUSE	P63017	HSP7C_MOUSE	Hspa8	Heat shock cognate 71 kDa protein	49808.8	31886.3	111647	39812.1	42154.3	68976.7	39069.9	28546.2	-0.443939	0.446669	-0.716824
sp|P26043|RADI_MOUSE	P26043	RADI_MOUSE	Rdx	Radixin	65698	29830.1	84829.8	40606	40584.1	89414.9	39837.3	27418.5	-0.444503	-0.0515507	-0.950771
sp|P97823|LYPA1_MOUSE	P97823	LYPA1_MOUSE	Lypla1	Acyl-protein thioesterase 1	63778.4	24023.1	95555.5	37509.2	34593.8	85142.2	51131.4	26635.8	-0.44754	0.152269	-0.622626
sp|Q99P72|RTN4_MOUSE	Q99P72	RTN4_MOUSE	Rtn4	Reticulon-4	50975.7	27902	89668.5	29356.5	42012	65600.3	48742.3	31638.2	-0.448153	0.145422	-0.420925
sp|Q921M4|GOGA2_MOUSE	Q921M4	GOGA2_MOUSE	Golga2	Golgin subfamily A member 2	13828.9	41381.1	23097.3	40691.8	39885.6	35461.2	49054.6	73761.6	-0.448618	-0.240237	0.704882
sp|Q6PE65|GPT2L_MOUSE	Q6PE65	GPT2L_MOUSE	Gpatch2l	G patch domain-containing protein 2-like	62838.3	32259.3	86477.7	17897.7	36383.3	93413.6	56297.5	21762.8	-0.448776	-0.314475	-0.733594
sp|Q9WU28|PFD5_MOUSE	Q9WU28	PFD5_MOUSE	Pfdn5	Prefoldin subunit 5	72249.2	26128	78633.9	39399.7	47976	86306.9	51945.8	24230.7	-0.448879	-0.186079	-0.817857
sp|Q7M6Y3|PICAL_MOUSE	Q7M6Y3	PICAL_MOUSE	Picalm	Phosphatidylinositol-binding clathrin assembly protein	52911.9	32006.9	61810.4	40218.2	46893.6	69027.2	39909.8	38362.9	-0.448983	-0.184167	-0.56656
sp|P61290|PSME3_MOUSE	P61290	PSME3_MOUSE	Psme3	Proteasome activator complex subunit 3	63203.5	31737.4	66683.9	39168.5	37475.2	92244.7	60398.4	24787.6	-0.450298	-0.293345	-0.606711
sp|Q6ZQ88|KDM1A_MOUSE	Q6ZQ88	KDM1A_MOUSE	Kdm1a	Lysine-specific histone demethylase 1A	43686.4	33541.2	54772.6	35826.9	42862.8	62678.1	40037	39231.4	-0.450613	-0.220227	-0.412982
sp|P46471|PRS7_MOUSE	P46471	PRS7_MOUSE	Psmc2	26S protease regulatory subunit 7	42881.4	35113.6	68805.7	38741.4	41169.7	65462.7	36405	33658.9	-0.451192	0.0123219	-0.605903
sp|O70251|EF1B_MOUSE	O70251	EF1B_MOUSE	Eef1b	Elongation factor 1-beta	68422.3	24943.2	96246.3	34934.2	39300.2	88359.7	77069.4	16812.7	-0.451346	0.039248	-0.443383
sp|Q8R3G1|PP1R8_MOUSE	Q8R3G1	PP1R8_MOUSE	Ppp1r8	Nuclear inhibitor of protein phosphatase 1	34326.3	37138	37210.3	43484.4	60659.7	37114.5	34659.7	45727.2	-0.452231	-0.27698	-0.282493
sp|Q9R0P5|DEST_MOUSE	Q9R0P5	DEST_MOUSE	Dstn	Destrin	62412.2	30616.3	85048.1	37182.2	42157.1	85136	38587	34059.8	-0.45241	-0.0585521	-0.809184
tr|Q3ULL6|Q3ULL6_MOUSE	Q3ULL6	Q3ULL6_MOUSE	Upf3b	Protein Upf3b	58142.6	23035.8	101279	27516.3	33600.2	77498.7	51603.3	28714	-0.452676	0.213235	-0.468062
sp|Q9CZU6|CISY_MOUSE	Q9CZU6	CISY_MOUSE	Cs	Citrate synthase, mitochondrial	50300.5	35219.8	74201.9	48353.7	50719.6	66337.7	38547.7	29077.4	-0.452876	0.0662212	-0.791583
sp|Q61578|ADRO_MOUSE	Q61578	ADRO_MOUSE	Fdxr	NADPH:adrenodoxin oxidoreductase, mitochondrial	28427.7	43437.2	44320.1	52053.2	51643.8	46730.5	39707.5	41298.2	-0.452994	-0.0296482	-0.280258
sp|P62492|RB11A_MOUSE	P62492	RB11A_MOUSE	Rab11a	Ras-related protein Rab-11A	66697.7	29828.3	80537.3	38998	46360.7	85838.1	44777.6	22273.8	-0.45372	-0.145273	-0.97937
sp|P80317|TCPZ_MOUSE	P80317	TCPZ_MOUSE	Cct6a	T-complex protein 1 subunit zeta	31387.5	35414.7	46780.1	41486.5	48685.1	42821.1	43947.6	44372.4	-0.453975	-0.0520037	-0.05113
sp|Q91VA6|PDIP2_MOUSE	Q91VA6	PDIP2_MOUSE	Poldip2	Polymerase delta-interacting protein 2	25326.8	47712.8	32927.2	74485.3	59482.3	40571.2	29135.6	27315.2	-0.45402	0.10239	-0.825705
sp|Q9D1Q6|ERP44_MOUSE	Q9D1Q6	ERP44_MOUSE	Erp44	Endoplasmic reticulum resident protein 44	71505.4	27834.7	67611.2	42044.1	41594.6	94655.2	35630.7	25252.5	-0.455806	-0.313279	-1.16214
sp|Q9QZ08|NAGK_MOUSE	Q9QZ08	NAGK_MOUSE	Nagk	N-acetyl-D-glucosamine kinase	47464.9	30869.2	84709.6	36047.2	32272.3	75183.4	51543.1	31247	-0.45603	0.168363	-0.376212
sp|Q8BFP9|PDK1_MOUSE	Q8BFP9	PDK1_MOUSE	Pdk1	[Pyruvate dehydrogenase (acetyl-transferring)] kinase isozyme 1, mitochondrial	22685.3	47750.1	28244.3	50022.4	60106.8	36528.6	25809.8	48946.7	-0.456249	-0.304152	-0.370353
sp|P39749|FEN1_MOUSE	P39749	FEN1_MOUSE	Fen1	Flap endonuclease 1	59410	34643.4	71892.7	39994.1	44321.3	84729	44575.9	32338.8	-0.456381	-0.205894	-0.746603
sp|Q8BTV2|CPSF7_MOUSE	Q8BTV2	CPSF7_MOUSE	Cpsf7	Cleavage and polyadenylation specificity factor subunit 7	55935.4	26528.8	87204.4	21849.3	32193.2	80962.1	65768	18051.4	-0.456463	-0.0532648	-0.432947
sp|Q9DB15|RM12_MOUSE	Q9DB15	RM12_MOUSE	Mrpl12	39S ribosomal protein L12, mitochondrial	83861	26180	77222.4	40714.2	40451.3	110696	54570	15394.7	-0.457913	-0.357942	-1.11125
sp|Q8BY89|CTL2_MOUSE	Q8BY89	CTL2_MOUSE	Slc44a2	Choline transporter-like protein 2	59607.5	14975.7	92347.6	26413.5	37226.7	65268.4	43393.3	29296.8	-0.458632	0.212506	-0.495724
sp|Q8K0D0|CDK17_MOUSE	Q8K0D0	CDK17_MOUSE	Cdk17	Cyclin-dependent kinase 17	58563.4	21679.6	84751.7	22532.1	45062.6	65327.5	41855.6	34559.5	-0.460163	-0.0411785	-0.530682
sp|Q921M7|FA49B_MOUSE	Q921M7	FA49B_MOUSE	Fam49b	Protein FAM49B	68409.4	30845.5	93268.3	38547.3	48486.3	88081.5	33840.2	23598.8	-0.460407	-0.051096	-1.24951
sp|Q8VED9|LEGL_MOUSE	Q8VED9	LEGL_MOUSE	Lgalsl	Galectin-related protein	46024.9	27084.4	89738.7	30254.1	30933.7	69674.7	61751.2	31740.2	-0.460625	0.254196	-0.105846
sp|O88844|IDHC_MOUSE	O88844	IDHC_MOUSE	Idh1	Isocitrate dehydrogenase [NADP] cytoplasmic	53911	33143	97692.6	41965.1	49194	70683.8	35879.3	28321.7	-0.461582	0.220329	-0.900897
sp|Q8C1A5|THOP1_MOUSE	Q8C1A5	THOP1_MOUSE	Thop1	Thimet oligopeptidase	53737.2	30954	88139.7	37035	44257.1	72390.8	40073.5	34917.6	-0.461876	0.101783	-0.63737
sp|Q7TSQ8|PDPR_MOUSE	Q7TSQ8	PDPR_MOUSE	Pdpr	Pyruvate dehydrogenase phosphatase regulatory subunit, mitochondrial	41112.3	37556	32075.9	55714.4	48169.8	60232.2	29798	42414.6	-0.462538	-0.304258	-0.586069
sp|Q922U2|K2C5_MOUSE	Q922U2	K2C5_MOUSE	Krt5	Keratin, type II cytoskeletal 5	51776.6	22736.4	89141.9	26487.5	30278.9	72399.1	52855.2	40383.6	-0.462563	0.171381	-0.139126
sp|Q9R111|GUAD_MOUSE	Q9R111	GUAD_MOUSE	Gda	Guanine deaminase	46858.1	25771.7	88579.3	28706.1	36236	63908.7	38070.6	40232.5	-0.463452	0.227935	-0.354946
tr|Q3TMX5|Q3TMX5_MOUSE	Q3TMX5	Q3TMX5_MOUSE	Manf	Arginine-rich, mutated in early stage tumors, isoform CRA_b	87043.4	23980.1	81095.1	33794.2	40151.6	112964	56678.9	16271.6	-0.463754	-0.414374	-1.06963
sp|Q04899|CDK18_MOUSE	Q04899	CDK18_MOUSE	Cdk18	Cyclin-dependent kinase 18	55894.4	28590.9	87984.2	23208.5	45198.8	71364.9	47250.8	22706.4	-0.464347	-0.0680568	-0.736575
sp|Q9JHS4|CLPX_MOUSE	Q9JHS4	CLPX_MOUSE	Clpx	ATP-dependent Clp protease ATP-binding subunit clpX-like, mitochondrial	16238	48441.8	21114.9	63202.7	65899.6	23424.9	19917	43441.4	-0.465739	-0.0832211	-0.495521
sp|P61082|UBC12_MOUSE	P61082	UBC12_MOUSE	Ube2m	NEDD8-conjugating enzyme Ubc12	65213.7	28587	71985.7	32214	47660.7	81932.4	68418.5	25300.1	-0.466319	-0.31464	-0.467583
sp|Q8CEC6|PPWD1_MOUSE	Q8CEC6	PPWD1_MOUSE	Ppwd1	Peptidylprolyl isomerase domain and WD repeat-containing protein 1	42968.5	28370.4	72717.3	31784.4	40619.9	58028.9	46374.1	44554.8	-0.467613	0.0831514	-0.117564
sp|P62315|SMD1_MOUSE	P62315	SMD1_MOUSE	Snrpd1	Small nuclear ribonucleoprotein Sm D1	9740.13	9989.02	14384.8	7463.64	9238.78	18047.7	204126	103977	-0.467859	-0.320654	3.49715
sp|P19324|SERPH_MOUSE	P19324	SERPH_MOUSE	Serpinh1	Serpin H1	58263.2	28897.7	68437.4	40779.3	40654.9	79903.7	51957.9	34324.2	-0.467981	-0.142541	-0.482602
sp|P22892|AP1G1_MOUSE	P22892	AP1G1_MOUSE	Ap1g1	AP-1 complex subunit gamma-1	43380.6	42542.8	57659.2	36405.7	43156.4	75900.2	41855.5	30942.9	-0.470525	-0.33992	-0.709669
tr|Q3UJB0|Q3UJB0_MOUSE	Q3UJB0	Q3UJB0_MOUSE	Sf3b2	Protein Sf3b2	48659.6	24715.4	75794.8	28196.5	38579.6	63109.1	54344.7	43586.1	-0.470799	0.0323039	-0.0543249
sp|Q9D051|ODPB_MOUSE	Q9D051	ODPB_MOUSE	Pdhb	Pyruvate dehydrogenase E1 component subunit beta, mitochondrial	23039.1	43050.1	29261.9	65291.5	60105.2	31502.2	22015.2	45453.6	-0.471049	0.0456654	-0.441244
sp|Q9CQV8|1433B_MOUSE	Q9CQV8	1433B_MOUSE	Ywhab	14-3-3 protein beta/alpha	65942.6	26214.5	124649	35834.3	43509.5	84245.7	41082.3	21777.5	-0.471214	0.32904	-1.02317
sp|P63038|CH60_MOUSE	P63038	CH60_MOUSE	Hspd1	60 kDa heat shock protein, mitochondrial	51191.8	33269.6	56405.1	48160	47573.5	69616.3	42338.4	29301.9	-0.472483	-0.164447	-0.710004
sp|P51859|HDGF_MOUSE	P51859	HDGF_MOUSE	Hdgf	Hepatoma-derived growth factor	73614.6	26150	82474.9	37999.6	42240.1	96296.1	51321.4	23614.2	-0.473663	-0.201536	-0.886541
sp|Q9DC61|MPPA_MOUSE	Q9DC61	MPPA_MOUSE	Pmpca	Mitochondrial-processing peptidase subunit alpha	23396.2	40754.9	34918.4	53853.3	55639.9	33468.6	29411.1	49152.8	-0.474089	-0.00546422	-0.181697
sp|P47738|ALDH2_MOUSE	P47738	ALDH2_MOUSE	Aldh2	Aldehyde dehydrogenase, mitochondrial	45262.1	37025	46629	52634.7	53500.1	60837.6	32388.4	35367.8	-0.474563	-0.203963	-0.754876
sp|Q9CQW1|YKT6_MOUSE	Q9CQW1	YKT6_MOUSE	Ykt6	Synaptobrevin homolog YKT6	66618.1	25949.5	73143.1	45595	44568.9	84059.4	46152.3	21566.3	-0.474628	-0.115425	-0.925584
sp|Q9WTX5|SKP1_MOUSE	Q9WTX5	SKP1_MOUSE	Skp1	S-phase kinase-associated protein 1	58219.2	25847.7	105660	25813.9	37144.8	79727.7	47575.5	27629.4	-0.475325	0.169837	-0.636036
sp|Q6GSS7|H2A2A_MOUSE	Q6GSS7	H2A2A_MOUSE	Hist2h2aa1	Histone H2A type 2-A	64021.3	33443.4	70796.5	47246.8	38363	97169.4	40370	22871.6	-0.475685	-0.199322	-1.09969
sp|Q99JY9|ARP3_MOUSE	Q99JY9	ARP3_MOUSE	Actr3	Actin-related protein 3	69541.1	22897.3	88074.3	31628.5	38055.8	90538	55250.6	26557	-0.476257	-0.103365	-0.652514
sp|Q9CWK8|SNX2_MOUSE	Q9CWK8	SNX2_MOUSE	Snx2	Sorting nexin-2	66537.8	28566.4	86159.4	38328.2	59841.3	72462.6	43057.4	25064.7	-0.476276	-0.087853	-0.957661
sp|A6H8H2|DEN4C_MOUSE	A6H8H2	DEN4C_MOUSE	Dennd4c	DENN domain-containing protein 4C	31454.6	37764.6	49934.7	40967.4	50166	46139.5	69473.6	34244.4	-0.476444	-0.0833043	0.106976
sp|Q04447|KCRB_MOUSE	Q04447	KCRB_MOUSE	Ckb	Creatine kinase B-type	50652.8	31262.4	81989.6	26547.3	31286.8	82758.5	46813.4	22080.4	-0.477404	-0.0714214	-0.72716
sp|P35278|RAB5C_MOUSE	P35278	RAB5C_MOUSE	Rab5c	Ras-related protein Rab-5C	65166.1	33467.2	69340.7	41623	41073.6	96298.4	37495.7	28150	-0.47794	-0.308	-1.06531
sp|Q9D0M3|CY1_MOUSE	Q9D0M3	CY1_MOUSE	Cyc1	Cytochrome c1, heme protein, mitochondrial	43609.4	32881.4	64290.3	37694.4	38093.1	68452.6	39319.1	38241.3	-0.478114	-0.0631187	-0.458079
sp|P27048|RSMB_MOUSE	P27048	RSMB_MOUSE	Snrpb	Small nuclear ribonucleoprotein-associated protein B	6139.31	6951.54	13266.9	9110.11	7305.95	10929.2	233034	98144.1	-0.478163	0.295295	4.18281
sp|Q9CQR6|PPP6_MOUSE	Q9CQR6	PPP6_MOUSE	Ppp6c	Serine/threonine-protein phosphatase 6 catalytic subunit	45196.4	34758.6	37379.6	44608.6	48204.4	63179.4	47550	39978.3	-0.478279	-0.442052	-0.347717
sp|P60710|ACTB_MOUSE	P60710	ACTB_MOUSE	Actb	Actin, cytoplasmic 1	45609.8	30832	70198.7	41083.6	44261.4	62229.5	38565.2	34896.4	-0.478297	0.0634939	-0.535667
sp|Q3UM18|LSG1_MOUSE	Q3UM18	LSG1_MOUSE	Lsg1	Large subunit GTPase 1 homolog	37315.8	34915.3	47320.4	44539.9	35091.7	65550.9	43713.2	33249.8	-0.478551	-0.131728	-0.387004
sp|P14152|MDHC_MOUSE	P14152	MDHC_MOUSE	Mdh1	Malate dehydrogenase, cytoplasmic	72642.7	24923.8	92168.8	32797.2	36330.7	99783.2	51786.5	22851.8	-0.480356	-0.123278	-0.866826
tr|D3YWS8|D3YWS8_MOUSE	D3YWS8	D3YWS8_MOUSE	Leng8	Leukocyte receptor cluster (LRC) member 8, isoform CRA_a	41243.7	24436.2	71656.7	25458.9	28267.8	63365.3	72878.9	52788.9	-0.480418	0.0838326	0.455674
sp|P47753|CAZA1_MOUSE	P47753	CAZA1_MOUSE	Capza1	F-actin-capping protein subunit alpha-1	59695.1	27841.8	76349.6	30939.7	45624.6	76569.7	58521.9	29656.8	-0.481214	-0.187671	-0.470675
sp|Q91V12|BACH_MOUSE	Q91V12	BACH_MOUSE	Acot7	Cytosolic acyl coenzyme A thioester hydrolase	40678	38412.3	50438.1	35051.9	38923.6	71480.9	63104.1	36407.2	-0.481226	-0.36897	-0.149867
sp|Q91YH5|ATLA3_MOUSE	Q91YH5	ATLA3_MOUSE	Atl3	Atlastin-3	20245.3	41929.8	43331.8	65812.5	62096.2	24725.7	21900	42475	-0.481721	0.330106	-0.431558
sp|Q920E5|FPPS_MOUSE	Q920E5	FPPS_MOUSE	Fdps	Farnesyl pyrophosphate synthase	65759.7	30722.3	64177.5	35163.8	34858.7	99926.1	50396.6	32062.4	-0.482327	-0.440192	-0.708908
sp|P61087|UBE2K_MOUSE	P61087	UBE2K_MOUSE	Ube2k	Ubiquitin-conjugating enzyme E2 K	72365.5	30683.2	72075.3	44658.7	30292.7	113758	44967	24241.2	-0.483249	-0.30335	-1.05756
sp|Q61233|PLSL_MOUSE	Q61233	PLSL_MOUSE	Lcp1	Plastin-2	61078.1	26678.3	67858.7	36896.7	47677.8	75244.6	37068.7	30837.9	-0.486173	-0.230724	-0.856124
sp|P47857|K6PF_MOUSE	P47857	K6PF_MOUSE	Pfkm	ATP-dependent 6-phosphofructokinase, muscle type	47541.4	28345.3	90426.2	36607.1	34619.1	71681.7	47790.3	27459.2	-0.486233	0.257055	-0.498397
sp|Q68FH0|PKP4_MOUSE	Q68FH0	PKP4_MOUSE	Pkp4	Plakophilin-4	56960.6	29624.3	79382.9	23918.1	46713.3	74625.4	52519.8	22964.6	-0.486853	-0.232185	-0.684791
sp|Q60864|STIP1_MOUSE	Q60864	STIP1_MOUSE	Stip1	Stress-induced-phosphoprotein 1	57831.2	29404.7	85230.9	36470.2	35136.6	87119.3	56426.6	24946.2	-0.48691	-0.00656145	-0.587287
sp|Q8R5C8|ZMY11_MOUSE	Q8R5C8	ZMY11_MOUSE	Zmynd11	Zinc finger MYND domain-containing protein 11	76417.9	15758.5	81814	25491.2	58554	70724.2	44769.6	24840.1	-0.48801	-0.268759	-0.89312
sp|Q99N84|RT18B_MOUSE	Q99N84	RT18B_MOUSE	Mrps18b	28S ribosomal protein S18b, mitochondrial	24765.7	37807.4	41833.8	64537.8	52416.2	35349	33414.5	38912.9	-0.488107	0.277393	-0.279105
sp|P62631|EF1A2_MOUSE	P62631	EF1A2_MOUSE	Eef1a2	Elongation factor 1-alpha 2	59462.3	26264.4	78410.6	24404.4	31017.1	89257.1	75527.5	24413.3	-0.488509	-0.226276	-0.26718
sp|Q8CGK3|LONM_MOUSE	Q8CGK3	LONM_MOUSE	Lonp1	Lon protease homolog, mitochondrial	21719	45515.2	28382.7	63754.3	64749.2	29598.9	21154.6	42423.8	-0.4888	-0.0342133	-0.569457
sp|Q8CBW3|ABI1_MOUSE	Q8CBW3	ABI1_MOUSE	Abi1	Abl interactor 1	54905.7	30602.2	75755.5	39275.5	43746.5	76347	43506.8	26815.4	-0.49003	-0.0621354	-0.772106
sp|Q8K411|PREP_MOUSE	Q8K411	PREP_MOUSE	Pitrm1	Presequence protease, mitochondrial	33543.4	37685.2	53833.7	47251.9	58962.2	41156.5	32666.4	41724.1	-0.491183	0.0138661	-0.428521
sp|P50247|SAHH_MOUSE	P50247	SAHH_MOUSE	Ahcy	Adenosylhomocysteinase	49026.2	26457.4	99047.2	37647	41219.8	64887.6	41180	28957.1	-0.491291	0.365426	-0.597277
tr|Q91VA7|Q91VA7_MOUSE	Q91VA7	Q91VA7_MOUSE	Idh3b	Isocitrate dehydrogenase 3 (NAD+) beta	32568.1	36867.1	47933.4	56948.9	59382.3	38234.5	35014.6	36685.8	-0.491462	0.103571	-0.445149
sp|Q8BMK4|CKAP4_MOUSE	Q8BMK4	CKAP4_MOUSE	Ckap4	Cytoskeleton-associated protein 4	61459.3	26301.7	90802.9	38535.6	42215.9	81243.4	48879	30073.5	-0.492383	0.067117	-0.644977
sp|Q91WR5|AK1CL_MOUSE	Q91WR5	AK1CL_MOUSE	Akr1c21	Aldo-keto reductase family 1 member C21	24634.4	9225.36	378596	12552.6	12377.9	35302.7	20636	10831.5	-0.493829	3.03624	-0.599538
sp|P47941|CRKL_MOUSE	P47941	CRKL_MOUSE	Crkl	Crk-like protein	52891.2	30178	91516.8	34155.8	40542.9	76440.3	49807.6	28720.1	-0.493915	0.103369	-0.575028
sp|Q3TTY5|K22E_MOUSE	Q3TTY5	K22E_MOUSE	Krt2	Keratin, type II cytoskeletal 2 epidermal	47180.7	23794.3	101070	23757.6	31672.4	68282.1	48526.9	35765.8	-0.49396	0.320595	-0.245864
sp|A2ATU0|DHTK1_MOUSE	A2ATU0	DHTK1_MOUSE	Dhtkd1	Probable 2-oxoglutarate dehydrogenase E1 component DHKTD1, mitochondrial	15615.8	49796.8	24128.9	61923.5	72292.3	19835.2	19363.9	39338.8	-0.494062	-0.0984153	-0.650203
sp|P31938|MP2K1_MOUSE	P31938	MP2K1_MOUSE	Map2k1	Dual specificity mitogen-activated protein kinase kinase 1	45900.1	41796.2	50679.9	45783.4	50274.9	73312.6	32799.2	32974.1	-0.494945	-0.357482	-0.90996
tr|F7BPW6|F7BPW6_MOUSE	F7BPW6	F7BPW6_MOUSE	Sec16a	Protein Sec16a (Fragment)	31599.8	38105.6	62888.4	32673.9	55640.8	42643.2	37247.6	47067.1	-0.495685	-0.0405147	-0.221173
sp|P17751|TPIS_MOUSE	P17751	TPIS_MOUSE	Tpi1	Triosephosphate isomerase	54719.1	26740.9	95355.4	35495.5	40404.5	74487	48456.3	24881.4	-0.496109	0.187652	-0.647645
sp|Q91WM2|CECR5_MOUSE	Q91WM2	CECR5_MOUSE	Cecr5	Cat eye syndrome critical region protein 5 homolog	18789.6	48636.8	24027.9	63924.5	68230.1	26895.5	15638.2	43014.2	-0.496521	-0.11311	-0.697645
sp|P62737|ACTA_MOUSE	P62737	ACTA_MOUSE	Acta2	Actin, aortic smooth muscle	43886.3	24957.3	124598	33265.7	37131.1	60038.1	69366.4	28617.9	-0.497176	0.700112	0.0120503
sp|P43274|H14_MOUSE	P43274	H14_MOUSE	Hist1h1e	Histone H1.4	44741.9	17135.5	80029.4	29436.3	8468.59	78927.7	97968.1	32810.2	-0.498162	0.324834	0.581478
sp|P28271|ACOC_MOUSE	P28271	ACOC_MOUSE	Aco1	Cytoplasmic aconitate hydratase	68859.7	30591.6	98039.8	37622.6	39008.4	101468	46617.9	21642.6	-0.498267	-0.0503087	-1.04121
sp|P58771|TPM1_MOUSE	P58771	TPM1_MOUSE	Tpm1	Tropomyosin alpha-1 chain	29843.4	15161.6	45257.6	16507.7	22340.7	41241.2	283334	14583.5	-0.498533	-0.0418211	2.22822
sp|P28352|APEX1_MOUSE	P28352	APEX1_MOUSE	Apex1	DNA-(apurinic or apyrimidinic site) lyase	48877.8	24350	110158	30799	33436.9	70021.4	44428.4	27071.1	-0.498587	0.446204	-0.533046
sp|Q61733|RT31_MOUSE	Q61733	RT31_MOUSE	Mrps31	28S ribosomal protein S31, mitochondrial	19374.5	46712.7	26982.7	67520.3	64002.9	29379.5	22832.8	40324.5	-0.49878	0.0172095	-0.564202
sp|Q99LI8|HGS_MOUSE	Q99LI8	HGS_MOUSE	Hgs	Hepatocyte growth factor-regulated tyrosine kinase substrate	50391.8	26572.1	87780	30047.9	39662	69092.2	53579.5	26522.3	-0.498817	0.11561	-0.441164
sp|Q9EPC1|PARVA_MOUSE	Q9EPC1	PARVA_MOUSE	Parva	Alpha-parvin	68067.6	32216	63111.2	41929.3	41255.4	100486	42225.8	27029.1	-0.499181	-0.432321	-1.03328
sp|Q3UHX2|HAP28_MOUSE	Q3UHX2	HAP28_MOUSE	Pdap1	28 kDa heat- and acid-stable phosphoprotein	62277.5	27422.1	59671.4	36137.1	43150.9	83761.5	48964.4	30916.8	-0.500659	-0.405608	-0.667904
sp|Q60759|GCDH_MOUSE	Q60759	GCDH_MOUSE	Gcdh	Glutaryl-CoA dehydrogenase, mitochondrial	29919.1	44383.9	40025	55432.5	56796.1	48333.2	26064.8	44732.2	-0.500671	-0.139234	-0.570405
sp|Q9Z2M7|PMM2_MOUSE	Q9Z2M7	PMM2_MOUSE	Pmm2	Phosphomannomutase 2	62092.7	34433	70275.4	43229.7	46805	89774.7	40165.6	26887.3	-0.500758	-0.266985	-1.02637
sp|Q8BKC8|PI4KB_MOUSE	Q8BKC8	PI4KB_MOUSE	Pi4kb	Phosphatidylinositol 4-kinase beta	61347.8	29728.5	78477	16446.9	47471.2	81399.4	54091.1	22575.9	-0.500775	-0.44108	-0.749246
sp|Q61035|SYHC_MOUSE	Q61035	SYHC_MOUSE	Hars	Histidine--tRNA ligase, cytoplasmic	50393.3	27176.4	83920.8	32664.4	36614.4	73219.2	42032.3	39944.6	-0.501754	0.0860646	-0.422031
sp|P24527|LKHA4_MOUSE	P24527	LKHA4_MOUSE	Lta4h	Leukotriene A-4 hydrolase	69084.2	30170.5	84175.6	40001.9	41239.2	99333.3	51303.4	19339.7	-0.502108	-0.178911	-0.992694
sp|P48678|LMNA_MOUSE	P48678	LMNA_MOUSE	Lmna	Prelamin-A/C	57364	22110.3	146791	28665.8	36246.5	76323.4	44954.5	20428.8	-0.502261	0.640291	-0.783828
sp|Q9JI91|ACTN2_MOUSE	Q9JI91	ACTN2_MOUSE	Actn2	Alpha-actinin-2	75388.6	24985	86689	40959	41939.4	100277	44784.9	19111.2	-0.502702	-0.155912	-1.15428
sp|Q6ZQ93|UBP34_MOUSE	Q6ZQ93	UBP34_MOUSE	Usp34	Ubiquitin carboxyl-terminal hydrolase 34	52573.5	28253.7	86673.5	30530	40525.2	74080.8	43539.5	29819.6	-0.503771	0.0323331	-0.643634
sp|Q61599|GDIR2_MOUSE	Q61599	GDIR2_MOUSE	Arhgdib	Rho GDP-dissociation inhibitor 2	56084.7	23096.5	160903	30498.5	27477.3	84846.3	49828.3	21807.3	-0.504432	0.768939	-0.648913
sp|Q6IFZ6|K2C1B_MOUSE	Q6IFZ6	K2C1B_MOUSE	Krt77	Keratin, type II cytoskeletal 1b	47637.7	21791	105340	20682.9	29738.1	68796.5	48815.8	43541.1	-0.505098	0.354979	-0.0934106
sp|Q9D2M8|UB2V2_MOUSE	Q9D2M8	UB2V2_MOUSE	Ube2v2	Ubiquitin-conjugating enzyme E2 variant 2	75509.5	27770.1	79066.5	30474.7	45070.2	101541	53234.7	19923.9	-0.505438	-0.420519	-1.00289
sp|Q8K0V2|DCNL3_MOUSE	Q8K0V2	DCNL3_MOUSE	Dcun1d3	DCN1-like protein 3	56880.7	28400.1	56877.1	33496.3	37300.3	83790.8	44570.3	25228.5	-0.5058	-0.422122	-0.794818
sp|Q9CWX9|DDX47_MOUSE	Q9CWX9	DDX47_MOUSE	Ddx47	Probable ATP-dependent RNA helicase DDX47	50288.4	22468.7	89189	32494.9	42977.8	60371.9	43548.1	37016.8	-0.506374	0.235604	-0.359312
sp|Q9DBS1|TMM43_MOUSE	Q9DBS1	TMM43_MOUSE	Tmem43	Transmembrane protein 43	46003.3	21630.2	84466.5	39630.3	39401.4	56684.2	68112.9	35249.9	-0.506581	0.369073	0.105325
sp|Q9QZD9|EIF3I_MOUSE	Q9QZD9	EIF3I_MOUSE	Eif3i	Eukaryotic translation initiation factor 3 subunit I	50354.6	29663.3	78973.9	32716.8	39020	74686.7	55772.8	31177.4	-0.506922	-0.0258097	-0.387057
tr|E9Q6J6|E9Q6J6_MOUSE	E9Q6J6	E9Q6J6_MOUSE	Psg20	Protein Psg20	66691.9	22220.9	85237.4	19952.4	55665.4	70793.1	54625.5	20725.4	-0.508201	-0.26567	-0.746968
sp|Q75UR0|ANO5_MOUSE	Q75UR0	ANO5_MOUSE	Ano5	Anoctamin-5	62543.1	23919.1	79496.6	21320.3	64604.2	58394.8	40027.8	36254.1	-0.508506	-0.286908	-0.689234
tr|E9Q6H8|E9Q6H8_MOUSE	E9Q6H8	E9Q6H8_MOUSE	Plekha5	Protein Plekha5	33489.7	44024.2	45850.3	43390.6	47232.4	63051.1	34206.6	37966.3	-0.50869	-0.305439	-0.611687
tr|Q99JZ4|Q99JZ4_MOUSE	Q99JZ4	Q99JZ4_MOUSE	Sar1a	GTP-binding protein SAR1a	42798.5	37964.3	59923.7	45067.1	58389	56560.9	31010.4	33761.7	-0.509242	-0.130743	-0.82756
sp|Q8BVE3|VATH_MOUSE	Q8BVE3	VATH_MOUSE	Atp6v1h	V-type proton ATPase subunit H	37670.3	40901.4	76229	35848.7	41602.6	70246.3	36110.4	29974.2	-0.50947	0.0029482	-0.759165
sp|P30999|CTND1_MOUSE	P30999	CTND1_MOUSE	Ctnnd1	Catenin delta-1	54253.9	28991.7	80070.7	29748	47411.2	71094.3	46404.5	26754.7	-0.50951	-0.109832	-0.695843
sp|Q60597|ODO1_MOUSE	Q60597	ODO1_MOUSE	Ogdh	2-oxoglutarate dehydrogenase, mitochondrial	18875.7	50126.3	29008.7	54772.7	72786.4	25468.7	20126.4	38765.6	-0.509894	-0.229902	-0.738463
sp|Q922H4|GMPPA_MOUSE	Q922H4	GMPPA_MOUSE	Gmppa	Mannose-1-phosphate guanyltransferase alpha	44457.1	31060.9	69991.4	43639.9	52532	55055.8	50930.8	30342.1	-0.510624	0.0788449	-0.404669
sp|P61460|DEPD5_MOUSE	P61460	DEPD5_MOUSE	Depdc5	DEP domain-containing protein 5	59130.6	29646.8	56817.2	22863.8	35175.9	91309.2	56832.5	28347.7	-0.510703	-0.666662	-0.570377
sp|P25425|PO2F1_MOUSE	P25425	PO2F1_MOUSE	Pou2f1	POU domain, class 2, transcription factor 1	66193.4	19432.8	89691.3	27207.4	43146	78901.2	49877	28122.7	-0.511316	-0.0621814	-0.645899
sp|P62751|RL23A_MOUSE	P62751	RL23A_MOUSE	Rpl23a	60S ribosomal protein L23a	72115.2	25406.9	76112.1	38036.8	42381.2	96679.5	59620.9	21571.3	-0.511913	-0.284799	-0.776303
sp|O88543|CSN3_MOUSE	O88543	CSN3_MOUSE	Cops3	COP9 signalosome complex subunit 3	54738.3	16037.3	80435.6	27375.4	40032.3	60950.9	39386.8	40635.2	-0.512791	0.0943897	-0.335647
sp|Q9D172|ES1_MOUSE	Q9D172	ES1_MOUSE	D10Jhu81e	ES1 protein homolog, mitochondrial	37341.9	35306.8	55323.7	45581.3	52991.9	50689.1	43880	35802.9	-0.513143	-0.0391537	-0.37981
sp|Q9JJG9|NOA1_MOUSE	Q9JJG9	NOA1_MOUSE	Noa1	Nitric oxide-associated protein 1	18949	46606.5	27844.3	59829.3	66235.6	27373	23182.7	42670.6	-0.513925	-0.0944992	-0.507386
sp|Q9R190|MTA2_MOUSE	Q9R190	MTA2_MOUSE	Mta2	Metastasis-associated protein MTA2	46576.6	31619	38103.5	35828.7	41994.4	69672.9	48802.1	42296.3	-0.514048	-0.594934	-0.293708
sp|Q9CRB9|CHCH3_MOUSE	Q9CRB9	CHCH3_MOUSE	Chchd3	Coiled-coil-helix-coiled-coil-helix domain-containing protein 3, mitochondrial	74234	27040.8	79443	34389.5	35356.7	109379	44684.8	23717.2	-0.515148	-0.346512	-1.08131
tr|D3YWT1|D3YWT1_MOUSE	D3YWT1	D3YWT1_MOUSE	Hnrnph3	MCG11326, isoform CRA_b	58590.1	22204.4	79986.6	30928.6	38088	77407.6	49383.4	27310.7	-0.515507	-0.0583804	-0.590651
sp|Q9DBC7|KAP0_MOUSE	Q9DBC7	KAP0_MOUSE	Prkar1a	cAMP-dependent protein kinase type I-alpha regulatory subunit	49500.1	45705.9	60445	40169.2	48033.9	88077	32051.9	27825.9	-0.515658	-0.435948	-1.18469
sp|P24549|AL1A1_MOUSE	P24549	AL1A1_MOUSE	Aldh1a1	Retinal dehydrogenase 1	65454.6	22512.4	113963	50105.6	39150.1	86794.4	34290.4	19668.2	-0.517753	0.381511	-1.22286
sp|Q9EQI8|RM46_MOUSE	Q9EQI8	RM46_MOUSE	Mrpl46	39S ribosomal protein L46, mitochondrial	18803.6	44620.5	37517.1	52999.8	49031.8	41783.5	27921.9	50103	-0.517902	-0.00474654	-0.218999
sp|Q6P1G2|KDM2B_MOUSE	Q6P1G2	KDM2B_MOUSE	Kdm2b	Lysine-specific demethylase 2B	61622.1	20087	74957.6	29979.3	41942.1	75133.5	55101.1	26545.3	-0.518872	-0.157918	-0.519979
sp|Q9CZ62|CEP97_MOUSE	Q9CZ62	CEP97_MOUSE	Cep97	Centrosomal protein of 97 kDa	45151.7	32405	69022.4	28358.5	37630.8	73531.7	45811.3	32460.1	-0.519349	-0.19096	-0.506115
sp|Q9DAM7|CL023_MOUSE	Q9DAM7	CL023_MOUSE	Tmem263	Transmembrane protein 263	50790.5	36986.4	88881.8	44871.7	48436.8	77397.5	43044.3	20372	-0.519612	0.0880523	-0.988601
sp|P11247|PERM_MOUSE	P11247	PERM_MOUSE	Mpo	Myeloperoxidase	48492	30058.6	186769	30189.1	36631.4	76065.4	48376	14610.7	-0.520751	0.944974	-0.839327
sp|Q7TQH0|ATX2L_MOUSE	Q7TQH0	ATX2L_MOUSE	Atxn2l	Ataxin-2-like protein	47139	31711.5	66872.6	29213.8	49574.2	63561.1	47670.3	31572.7	-0.520856	-0.235644	-0.513694
sp|Q62470|ITA3_MOUSE	Q62470	ITA3_MOUSE	Itga3	Integrin alpha-3	73134.8	26730.5	137703	37597	40429	103016	36301.6	16552.2	-0.522438	0.289328	-1.44041
sp|Q9CQE8|CN166_MOUSE	Q9CQE8	CN166_MOUSE	N/A	UPF0568 protein C14orf166 homolog	52930.5	24829.5	144956	24803.9	34392	77355	33693.6	21914.1	-0.523137	0.60326	-1.00688
sp|Q9CR95|NECP1_MOUSE	Q9CR95	NECP1_MOUSE	Necap1	Adaptin ear-binding coat-associated protein 1	25684.8	41955.6	54311.8	39926.6	50222.2	47015.1	37128.3	48218.6	-0.523623	-0.0451946	-0.18817
sp|P68368|TBA4A_MOUSE	P68368	TBA4A_MOUSE	Tuba4a	Tubulin alpha-4A chain	41214	39645.5	63348.2	51245	54364.2	61907.5	30297.4	27187.2	-0.524011	-0.0209784	-1.01625
sp|P53395|ODB2_MOUSE	P53395	ODB2_MOUSE	Dbt	Lipoamide acyltransferase component of branched-chain alpha-keto acid dehydrogenase complex, mitochondrial	27415.5	39700.5	43705.1	53566.2	59823.6	36707.4	33276.4	40774.2	-0.524336	0.0110221	-0.38248
sp|P63005|LIS1_MOUSE	P63005	LIS1_MOUSE	Pafah1b1	Platelet-activating factor acetylhydrolase IB subunit alpha	49723.5	30285	69446.3	31454.3	39463.2	75680.6	49048.1	33826.4	-0.52521	-0.190501	-0.474435
sp|Q6PAR5|GAPD1_MOUSE	Q6PAR5	GAPD1_MOUSE	Gapvd1	GTPase-activating protein and VPS9 domain-containing protein 1	53828.8	30903.1	64193.5	32134.6	42201.4	79815.8	40907.8	28741.6	-0.526107	-0.341055	-0.8089
sp|P97807|FUMH_MOUSE	P97807	FUMH_MOUSE	Fh	Fumarate hydratase, mitochondrial	44633.5	35156.7	92774.7	31262.9	48351	66590.1	38205.6	28946.7	-0.526611	0.109882	-0.775386
tr|Q8CCB2|Q8CCB2_MOUSE	Q8CCB2	Q8CCB2_MOUSE	Zfp207	BUB3-interacting and GLEBS motif-containing protein ZNF207	13088.4	26171.3	16049.4	45700.6	38273.8	18299	70180.9	80408	-0.527058	0.126329	1.41243
sp|P12367|KAP2_MOUSE	P12367	KAP2_MOUSE	Prkar2a	cAMP-dependent protein kinase type II-alpha regulatory subunit	64346.7	36414.1	73764	33789.8	44142	101072	39103.8	26582	-0.527242	-0.433118	-1.14452
sp|P97372|PSME2_MOUSE	P97372	PSME2_MOUSE	Psme2	Proteasome activator complex subunit 2	49167.5	26786.2	130209	20478.8	28910.9	80551.7	44559.6	24328.1	-0.527246	0.461126	-0.668119
sp|Q8VDN2|AT1A1_MOUSE	Q8VDN2	AT1A1_MOUSE	Atp1a1	Sodium/potassium-transporting ATPase subunit alpha-1	56703	34327.2	63592.6	35452.2	46595.6	84698.2	40196.1	28380	-0.528381	-0.406646	-0.937021
sp|P68254|1433T_MOUSE	P68254	1433T_MOUSE	Ywhaq	14-3-3 protein theta	43464.9	24235.9	130442	30098.5	33711.5	63941.9	41637.6	23738	-0.528496	0.717196	-0.578918
sp|Q9D358|PPAC_MOUSE	Q9D358	PPAC_MOUSE	Acp1	Low molecular weight phosphotyrosine protein phosphatase	80625.8	24979.3	72784.8	38701.7	39420.9	113027	50122.9	21191	-0.529636	-0.451448	-1.09606
sp|P61982|1433G_MOUSE	P61982	1433G_MOUSE	Ywhag	14-3-3 protein gamma	47583.9	29617.9	114651	31627.9	39118.7	72406.3	44665.9	29187.6	-0.530661	0.391356	-0.594628
sp|Q9ET54|PALLD_MOUSE	Q9ET54	PALLD_MOUSE	Palld	Palladin	50070.2	27334.8	70856.9	33180.9	52254.8	59675.7	38369.8	33484	-0.532105	-0.105495	-0.639468
sp|P34022|RANG_MOUSE	P34022	RANG_MOUSE	Ranbp1	Ran-specific GTPase-activating protein	54276.7	37186.7	65568.8	37809.6	47814.5	84619.5	46295.9	27381	-0.534007	-0.357339	-0.84599
sp|P06801|MAOX_MOUSE	P06801	MAOX_MOUSE	Me1	NADP-dependent malic enzyme	59771.4	26144.9	106893	36869.3	33662.7	90747.3	38471	22428.7	-0.5341	0.208581	-1.03059
sp|P70441|NHRF1_MOUSE	P70441	NHRF1_MOUSE	Slc9a3r1	Na(+)/H(+) exchange regulatory cofactor NHE-RF1	74510.6	26894.4	73982.8	42206.8	40884.1	106129	41202.2	22608.4	-0.53582	-0.339466	-1.20408
sp|Q8R2Q4|RRF2M_MOUSE	Q8R2Q4	RRF2M_MOUSE	Gfm2	Ribosome-releasing factor 2, mitochondrial	21800	46015.8	24431.4	53175.7	70352.6	28008.4	18104.9	51016.9	-0.536465	-0.341899	-0.508944
sp|Q9JMH6|TRXR1_MOUSE	Q9JMH6	TRXR1_MOUSE	Txnrd1	Thioredoxin reductase 1, cytoplasmic	73349.7	22132.9	143801	37579.1	47377.8	91136.2	41001.1	19551.2	-0.536722	0.388982	-1.19378
sp|P15532|NDKA_MOUSE	P15532	NDKA_MOUSE	Nme1	Nucleoside diphosphate kinase A	74074.4	24231.1	99534.7	37025.8	39537.4	103083	56163.8	17534.1	-0.536836	-0.0626408	-0.952485
sp|Q8VED5|K2C79_MOUSE	Q8VED5	K2C79_MOUSE	Krt79	Keratin, type II cytoskeletal 79	59993.5	20588.2	62882.6	23982.1	44960.6	72030.7	35491.8	22526.1	-0.537878	-0.429559	-1.01183
sp|P45952|ACADM_MOUSE	P45952	ACADM_MOUSE	Acadm	Medium-chain specific acyl-CoA dehydrogenase, mitochondrial	16265.7	48185.7	26979.2	66453.2	64275	29321.3	20386	41901.2	-0.538239	-0.00252925	-0.587516
sp|Q9CXW3|CYBP_MOUSE	Q9CXW3	CYBP_MOUSE	Cacybp	Calcyclin-binding protein	69031.1	29176.4	64526.1	42499.6	48521.9	94124	49933	20574.4	-0.538533	-0.41448	-1.01659
sp|Q62261|SPTB2_MOUSE	Q62261	SPTB2_MOUSE	Sptbn1	Spectrin beta chain, non-erythrocytic 1	54932.6	23187.5	115828	25565.6	33779.8	79689.8	47840.8	23354.5	-0.538539	0.317414	-0.672451
sp|P62960|YBOX1_MOUSE	P62960	YBOX1_MOUSE	Ybx1	Nuclease-sensitive element-binding protein 1	63571	27709.3	36344.6	24097.6	38634.3	93993.1	62419.6	32305.5	-0.539003	-1.13375	-0.485561
sp|P16546|SPTN1_MOUSE	P16546	SPTN1_MOUSE	Sptan1	Spectrin alpha chain, non-erythrocytic 1	58737.6	27687.3	77639.2	33610.3	41946.8	83668.1	48542.8	27181.4	-0.539488	-0.175208	-0.730181
sp|Q99KK7|DPP3_MOUSE	Q99KK7	DPP3_MOUSE	Dpp3	Dipeptidyl peptidase 3	43594.7	24706.9	65200.8	32410.8	38273.3	61044.7	51912.9	58075.2	-0.540138	-0.0250027	0.147221
sp|Q9QZ06|TOLIP_MOUSE	Q9QZ06	TOLIP_MOUSE	Tollip	Toll-interacting protein	51048.7	24442.3	94149.8	31408.8	33213.9	76646.2	61773.2	30661.3	-0.54129	0.192695	-0.249162
sp|P51174|ACADL_MOUSE	P51174	ACADL_MOUSE	Acadl	Long-chain specific acyl-CoA dehydrogenase, mitochondrial	26493.6	41303	35370.2	51496.8	62602.4	36104.5	48625.8	40978.2	-0.54194	-0.184344	-0.139589
[truncated: 380 more rows]
