# Supplementary material for: iDRiP for the systematic discovery of proteins bound directly to noncoding RNA
Source: Springer Nature journal article supplement (doi:10.1038/s41596-021-00555-9), 2021-06-09
Supplement: MOESM3 [file 41596_2021_555_MOESM3_ESM16.xlsx]

## Sheet: protein_final
					Normalized_intensities								Log2_ratios
Reference	Entry	Uniprot_Gene_name	GeneName	Protein_description	TER_1	TER_2	sense_1	sense_2	Luciferase_1	Luciferase_2	U1_1	U1_2	avg_TER/avg_luc	avg_sense/avg_luc	avg_U1/avg_luc
sp|P70371|TERF1_MOUSE	P70371	TERF1_MOUSE	Terf1	Telomeric repeat-binding factor 1	142987	98696.8	102473	50071.3	1778.78	3342.45	1812.24	3684.28	5.56048	4.8966	0.102028
sp|Q91WC1|POTE1_MOUSE	Q91WC1	POTE1_MOUSE	Pot1	Protection of telomeres protein 1	186380	96584.1	67275.8	34869	2532.72	3834.74	2589.98	5196.74	5.47376	4.00375	0.290297
sp|Q9QXG9|TINF2_MOUSE	Q9QXG9	TINF2_MOUSE	Tinf2	TERF1-interacting nuclear factor 2	146892	91225.6	87088.6	46134.2	2831.02	3149.42	5074.62	8751.83	5.31528	4.47745	1.20911
sp|Q6NZQ4|PAXI1_MOUSE	Q6NZQ4	PAXI1_MOUSE	Paxip1	PAX-interacting protein 1	190813	66227.2	88576	34240.6	3341.43	3632.64	6271.28	7648.84	5.20385	4.13836	0.997098
sp|Q5EE38|ACD_MOUSE	Q5EE38	ACD_MOUSE	Acd	Adrenocortical dysplasia protein	149652	90248.3	92897.2	40392.2	3240.98	4597.37	8287.29	12929.4	4.93574	4.08787	1.43658
sp|Q9WU62|INCE_MOUSE	Q9WU62	INCE_MOUSE	Incenp	Inner centromere protein	120157	92164.5	77239.3	51949.8	3762.31	3373.45	11531.8	17200.3	4.89504	4.17827	2.00953
sp|Q8VHN8|SDOS_MOUSE	Q8VHN8	SDOS_MOUSE	Nudt16l1	Protein syndesmos	30910.9	15521.5	4072.3	3934.14	1312.74	369.034	74882.4	127754	4.78707	2.25117	6.91277
tr|H7BX60|H7BX60_MOUSE	H7BX60	H7BX60_MOUSE	Pot1b	Protein Pot1b	167416	81962.1	73588.5	41842.1	4582.85	5022.49	5666.02	9662.86	4.69835	3.58704	0.674342
sp|Q5SU73|COIL_MOUSE	Q5SU73	COIL_MOUSE	Coil	Coilin	69671.3	48645.2	13897.4	12048.4	3342.33	2177.13	91200.6	119865	4.42198	2.2329	5.25702
sp|Q8K368|FANCI_MOUSE	Q8K368	FANCI_MOUSE	Fanci	Fanconi anemia group I protein homolog	60125.4	27815.1	30696.6	13455.9	2578.16	2238.37	71853.4	151626	4.19046	3.19643	5.536
sp|O35613|DAXX_MOUSE	O35613	DAXX_MOUSE	Daxx	Death domain-associated protein 6	74834.8	88842.7	99401.6	52987.3	4146.58	5309.04	18411.2	27440.8	4.11354	4.01044	2.27774
sp|Q8BUI3|LRWD1_MOUSE	Q8BUI3	LRWD1_MOUSE	LRWD1	Leucine-rich repeat and WD repeat-containing protein 1	124990	72786.4	56763.2	39019	5441.15	5995.4	24762.6	37872	4.11214	3.06611	2.45331
sp|O88700|BLM_MOUSE	O88700	BLM_MOUSE	Blm	Bloom syndrome protein homolog	91746	47598.9	63943.5	19193.8	4354.55	4503.54	53807.6	88760.6	3.97552	3.23043	4.00851
sp|Q8BHX3|BOREA_MOUSE	Q8BHX3	BOREA_MOUSE	Cdca8	Borealin	144825	73429.4	80178.4	34297.8	6219.7	8554.76	15034.1	19793.2	3.88483	2.95387	1.23711
sp|Q9CX83|ARMX1_MOUSE	Q9CX83	ARMX1_MOUSE	Armcx1	Armadillo repeat-containing X-linked protein 1	140012	53763.2	13351.2	8159.74	9182.87	4968.55	31729	39894.1	3.77536	0.604125	2.33948
sp|O70126|AURKB_MOUSE	O70126	AURKB_MOUSE	Aurkb	Aurora kinase B	121116	75702.3	85073.5	43726.2	7464.95	9940.23	15624.3	21876.9	3.49927	2.88754	1.10742
sp|Q61687|ATRX_MOUSE	Q61687	ATRX_MOUSE	Atrx	Transcriptional regulator ATRX	139348	71913.9	71694	38631.4	9404.2	9353.02	14000.2	15296.3	3.49351	2.55625	0.643282
sp|P14069|S10A6_MOUSE	P14069	S10A6_MOUSE	S100a6	Protein S100-A6	86355.7	45934	51865.4	32957.6	6740.48	5414.43	45226	37301.6	3.44409	2.80292	2.76334
sp|Q91VL8|TE2IP_MOUSE	Q91VL8	TE2IP_MOUSE	Terf2ip	Telomeric repeat-binding factor 2-interacting protein 1	139767	74821.4	60497.4	44548.8	9880.93	10997.4	10114.7	14309.1	3.36149	2.33094	0.226276
sp|O09000|NCOA3_MOUSE	O09000	NCOA3_MOUSE	Ncoa3	Nuclear receptor coactivator 3	26485.3	15512.6	15571.5	11041.8	3016.17	1082.18	113643	149213	3.3572	2.69903	6.00308
sp|Q80VD1|FA98B_MOUSE	Q80VD1	FA98B_MOUSE	Fam98b	Protein FAM98B	16347.1	13308.4	5452.6	1868.31	2929.89	312.864	106072	177051	3.19301	1.1748	6.44806
sp|P58774-2|TPM2_MOUSE	P58774-2	TPM2_MOUSE	Tpm2	Isoform 2 of Tropomyosin beta chain	119985	39777.3	44552	60799.6	8488.2	10329.4	10919	16408.9	3.08577	2.48506	0.538295
sp|Q921F2|TADBP_MOUSE	Q921F2	TADBP_MOUSE	Tardbp	TAR DNA-binding protein 43	66222.6	48813.8	12673.4	10374	8303.83	7439.69	77087.9	111331	2.86926	0.549846	3.58112
tr|Q8BGJ5|Q8BGJ5_MOUSE	Q8BGJ5	Q8BGJ5_MOUSE	Ptbp1	MCG13402, isoform CRA_a	29712.5	17680.3	16527	11389.2	3549.58	3139.37	94187.8	139765	2.82482	2.06125	5.12829
sp|P20263|PO5F1_MOUSE	P20263	PO5F1_MOUSE	Pou5f1	POU domain, class 5, transcription factor 1	11947.1	14218.7	12432.7	6240.68	2429.72	1427.77	106880	194560	2.76195	2.27525	6.28806
sp|Q9CQE8|CN166_MOUSE	Q9CQE8	CN166_MOUSE	>sp|Q9CQE8|CN166_MOUSE	n/a	17375.4	12605.9	9179.73	5661.08	2768.06	1723.23	112743	164529	2.73886	1.72437	5.94803
sp|Q9CWT2|BEX4_MOUSE	Q9CWT2	BEX4_MOUSE	Bex4	Protein BEX4	33189.1	30847.8	20441.7	17496.7	5557.31	4491.06	81941.6	135874	2.67194	1.9167	4.43807
sp|O70456|1433S_MOUSE	O70456	1433S_MOUSE	Sfn	14-3-3 protein sigma	102428	44534.9	84470.1	20736.6	9803.36	14706.7	10805.3	91546.2	2.58401	2.10178	2.06209
sp|P16460|ASSY_MOUSE	P16460	ASSY_MOUSE	Ass1	Argininosuccinate synthase	58282.5	42685.5	29404	20026	8904.18	8029.61	57878.2	104496	2.57592	1.54548	3.26135
sp|P52624|UPP1_MOUSE	P52624	UPP1_MOUSE	Upp1	Uridine phosphorylase 1	35460.1	24031.1	27388.1	11616.7	3495.61	6791.14	105190	115611	2.53189	1.92286	4.42389
sp|Q60953|PML_MOUSE	Q60953	PML_MOUSE	Pml	Protein PML	79176.4	67365.7	71991.8	42250.5	12865.1	14287.3	25515.1	33344.4	2.43216	2.07295	1.1162
sp|Q61539|ERR2_MOUSE	Q61539	ERR2_MOUSE	Esrrb	Steroid hormone receptor ERR2	27534.3	21617.2	22249.6	7977.21	4097.74	5049.98	103568	157343	2.42575	1.72434	4.834
tr|E9Q5C9|E9Q5C9_MOUSE	E9Q5C9	E9Q5C9_MOUSE	Nolc1	Protein Nolc1	65153.9	30868.4	19653.3	14049.6	11511.2	7101.49	82031.3	106926	2.36708	0.856585	3.34371
sp|P14602|HSPB1_MOUSE	P14602	HSPB1_MOUSE	Hspb1	Heat shock protein beta-1	50329.8	43554.3	30277.4	22548.1	8405.77	10992.3	70941.3	109498	2.27497	1.44532	3.21753
sp|P24472|GSTA4_MOUSE	P24472	GSTA4_MOUSE	Gsta4	Glutathione S-transferase A4	38788.8	29616.9	22365.7	13964.9	7004.77	7281.49	82637.4	140445	2.25949	1.34656	3.96488
sp|Q640M1|UT14A_MOUSE	Q640M1	UT14A_MOUSE	Utp14a	U3 small nucleolar RNA-associated protein 14 homolog A	61309.3	39821.9	44962.2	25275.2	12493.5	8831.11	63561.9	84804.7	2.24564	1.71972	2.79857
sp|Q6PIP5|NUDC1_MOUSE	Q6PIP5	NUDC1_MOUSE	Nudcd1	NudC domain-containing protein 1	31601.5	21367.5	12356.1	9185.36	6083.39	5130.1	101656	133568	2.23991	0.941878	4.39073
sp|Q5XG69|F169A_MOUSE	Q5XG69	F169A_MOUSE	Fam169a	Soluble lamin-associated protein of 75 kDa	35387.8	22253	16281.8	11201.8	7020.52	5360.42	78970.9	139250	2.21897	1.15045	4.1396
sp|P00375|DYR_MOUSE	P00375	DYR_MOUSE	Dhfr	Dihydrofolate reductase	34571.6	27677.8	25463.8	13181.9	7564.59	5815.14	83599.7	130315	2.21801	1.53026	3.99892
sp|Q3URE1|ACSF3_MOUSE	Q3URE1	ACSF3_MOUSE	Acsf3	Acyl-CoA synthetase family member 3, mitochondrial	85501.7	58254.4	33807.8	29980.9	15167.1	15750.6	52357	48507.3	2.21712	1.04487	1.70591
sp|Q8R4N0|CLYBL_MOUSE	Q8R4N0	CLYBL_MOUSE	Clybl	Citrate lyase subunit beta-like protein, mitochondrial	66291	48312.1	40020.6	50097.5	11434	13899.9	48555	56825.8	2.17751	1.83075	2.05647
sp|P97315|CSRP1_MOUSE	P97315	CSRP1_MOUSE	Csrp1	Cysteine and glycine-rich protein 1	50139.7	42514.1	63268.3	23411.5	9210.75	11423.5	49693.6	79017.2	2.16681	2.07065	2.64102
sp|Q8BJW6|EIF2A_MOUSE	Q8BJW6	EIF2A_MOUSE	Eif2a	Eukaryotic translation initiation factor 2A	58996.7	39924.6	28238.8	23423.4	10752	11902.9	69748.2	91324.1	2.12646	1.18929	2.82981
sp|Q9CX34|SUGT1_MOUSE	Q9CX34	SUGT1_MOUSE	Sugt1	Suppressor of G2 allele of SKP1 homolog	47919.4	38371.5	25780.1	16159.6	8726.57	11105.2	76385.6	119335	2.12139	1.0805	3.30291
sp|O08784|TCOF_MOUSE	O08784	TCOF_MOUSE	Tcof1	Treacle protein	30790.5	21147.1	21127.4	17527.2	7763.05	4441	79521.6	124586	2.08942	1.66328	4.0639
sp|Q99MZ7|PECR_MOUSE	Q99MZ7	PECR_MOUSE	Pecr	Peroxisomal trans-2-enoyl-CoA reductase	81291	47907.2	42952	36017.6	15410.9	15083	55339.2	49072.4	2.083	1.37278	1.77569
sp|P97770|THUM3_MOUSE	P97770	THUM3_MOUSE	Thumpd3	THUMP domain-containing protein 3	43999.5	33414.5	21521.9	15138.1	7779.1	10570.6	85747.9	114654	2.07684	0.998448	3.44907
sp|Q91YJ5|IF2M_MOUSE	Q91YJ5	IF2M_MOUSE	Mtif2	Translation initiation factor IF-2, mitochondrial	73966.1	43703.1	42428.6	44640	15159	12879.2	48625.7	56713	2.06927	1.63476	1.90957
sp|Q9D0Q7|RM45_MOUSE	Q9D0Q7	RM45_MOUSE	Mrpl45	39S ribosomal protein L45, mitochondrial	12170	14981.4	67917.8	155455	4280.32	2389.59	9880.77	18702.9	2.02529	5.06564	2.09945
sp|Q5SSK3|TEFM_MOUSE	Q5SSK3	TEFM_MOUSE	Tefm	Transcription elongation factor, mitochondrial	74235.8	38006.9	64814.7	51493.7	14809.1	13035.5	42930.8	40409.4	2.01115	2.06248	1.58161
sp|Q587J6|LITD1_MOUSE	Q587J6	LITD1_MOUSE	L1td1	LINE-1 type transposase domain-containing protein 1	65612.5	46202.1	50532.1	26205.3	15128.4	12839.7	43741.3	51934.2	1.99925	1.45615	1.77437
sp|Q99MV1|TDRD1_MOUSE	Q99MV1	TDRD1_MOUSE	Tdrd1	Tudor domain-containing protein 1	49195.7	29350.2	48661.6	12626.1	11271.6	8458.66	100585	79361.8	1.99313	1.63519	3.18909
sp|Q8K0D5|EFGM_MOUSE	Q8K0D5	EFGM_MOUSE	Gfm1	Elongation factor G, mitochondrial	56701.4	46143.3	36314.7	47706.7	10648.4	16040	51821.4	64217.1	1.94618	1.65454	2.12032
sp|Q05920|PYC_MOUSE	Q05920	PYC_MOUSE	Pc	Pyruvate carboxylase, mitochondrial	81064.5	44348	41518.4	28070.4	17310.4	15788.9	59328.5	52982.6	1.92181	1.07205	1.76263
sp|Q3ULD5|MCCB_MOUSE	Q3ULD5	MCCB_MOUSE	Mccc2	Methylcrotonoyl-CoA carboxylase beta chain, mitochondrial	84438.7	42615.4	46233.7	29123.6	18948.1	14612.7	60773.4	44656.3	1.92059	1.16697	1.65143
sp|Q9CQR4|ACO13_MOUSE	Q9CQR4	ACO13_MOUSE	Acot13	Acyl-coenzyme A thioesterase 13	67431.1	59133	49968	40672.8	17615.5	15898.2	43483	48329.7	1.91705	1.43541	1.45394
sp|P45952|ACADM_MOUSE	P45952	ACADM_MOUSE	Acadm	Medium-chain specific acyl-CoA dehydrogenase, mitochondrial	67195.1	53194.7	42361	45900.9	14785.9	17675.6	43852.2	52995.7	1.89091	1.44306	1.57699
sp|Q9JHI5|IVD_MOUSE	Q9JHI5	IVD_MOUSE	Ivd	Isovaleryl-CoA dehydrogenase, mitochondrial	84398	46012.4	42155.3	35676.2	17305.1	18079	47230	47203.3	1.88188	1.13725	1.41619
sp|Q9WUA3|K6PP_MOUSE	Q9WUA3	K6PP_MOUSE	Pfkp	ATP-dependent 6-phosphofructokinase, platelet type	68839.6	47263.6	39779.9	29946.8	13873.5	17931.9	53777.9	78586.4	1.86806	1.13244	2.05717
sp|Q99KK9|SYHM_MOUSE	Q99KK9	SYHM_MOUSE	Hars2	Probable histidine--tRNA ligase, mitochondrial	72410	48280	39136.4	48198.4	12936.3	20173.8	37592.6	55853.1	1.86596	1.39929	1.49686
sp|Q64012|RALY_MOUSE	Q64012	RALY_MOUSE	Raly	RNA-binding protein Raly	19342.1	13138	12264.2	7801.93	3582.06	5348.75	85729	136812	1.86269	1.1679	4.63913
sp|Q8BG05|ROA3_MOUSE	Q8BG05	ROA3_MOUSE	Hnrnpa3	Heterogeneous nuclear ribonucleoprotein A3	77681.7	21873.5	16755.1	15389.1	13904	13762.1	30703.6	58697.2	1.84737	0.216439	1.69217
sp|Q9CQ60|6PGL_MOUSE	Q9CQ60	6PGL_MOUSE	Pgls	6-phosphogluconolactonase	37574.1	22635.2	22659.9	14036.3	8921.53	7819.31	86634.8	107372	1.84662	1.13226	3.53466
sp|Q8K215|LYRM4_MOUSE	Q8K215	LYRM4_MOUSE	Lyrm4	LYR motif-containing protein 4	71505.1	48047.2	37260.3	45218	14340.7	19017	41866.4	51310.2	1.84155	1.306	1.48195
sp|D3YXK2|SAFB1_MOUSE	D3YXK2	SAFB1_MOUSE	Safb	Scaffold attachment factor B1	9596.87	7335.48	6456.28	6070.82	2741.58	2017.51	136514	148484	1.83102	1.39629	5.90412
sp|O35658|C1QBP_MOUSE	O35658	C1QBP_MOUSE	C1qbp	Complement component 1 Q subcomponent-binding protein, mitochondrial	73617.2	48731.2	56314.5	51267	12299.4	22263.9	31993.5	53682.6	1.82368	1.63811	1.30965
sp|Q8VEE4|RFA1_MOUSE	Q8VEE4	RFA1_MOUSE	Rpa1	Replication protein A 70 kDa DNA-binding subunit	85949.6	56126.6	28885.9	25027.4	20952.9	19335.7	38516.8	54530.9	1.81822	0.420273	1.2076
sp|Q9D0G0|RT30_MOUSE	Q9D0G0	RT30_MOUSE	Mrps30	28S ribosomal protein S30, mitochondrial	6969.55	12176	60139	171248	3987.32	1454.16	5329.75	9106.89	1.81494	5.41017	1.40767
sp|Q91ZA3|PCCA_MOUSE	Q91ZA3	PCCA_MOUSE	Pcca	Propionyl-CoA carboxylase alpha chain, mitochondrial	88299.7	41608.6	42396.9	26609.8	18807.9	18179.8	55746.2	49842.1	1.81237	0.899689	1.51333
sp|P37804|TAGL_MOUSE	P37804	TAGL_MOUSE	Tagln	Transgelin	36733.4	32807.3	33034.9	19977.9	9230.48	10660	85780.7	100634	1.80578	1.41426	3.22837
sp|Q99M87|DNJA3_MOUSE	Q99M87	DNJA3_MOUSE	Dnaja3	DnaJ homolog subfamily A member 3, mitochondrial	82390.1	47786.6	33126.9	43824.9	17232.2	20057.7	29878.5	55618.7	1.80361	1.04517	1.19709
sp|Q8JZY4|MRRP3_MOUSE	Q8JZY4	MRRP3_MOUSE	Kiaa0391	Mitochondrial ribonuclease P protein 3	52143.7	45344.6	46728.6	66253.2	11202.1	16749.9	41356	46752.9	1.80228	2.01507	1.65633
sp|Q8CFE2|CD027_MOUSE	Q8CFE2	CD027_MOUSE	>sp|Q8CFE2|CD027_MOUSE	n/a	48011.8	51572.9	6338.56	3931.23	23161.9	5498.54	36715.5	176119	1.79686	-1.48065	2.8926
sp|Q9CX86|ROA0_MOUSE	Q9CX86	ROA0_MOUSE	Hnrnpa0	Heterogeneous nuclear ribonucleoprotein A0	8772.98	9344.37	9981.94	5591.94	2833.81	2469.34	129244	125544	1.77245	1.55421	5.58631
sp|Q9DCT8|CRIP2_MOUSE	Q9DCT8	CRIP2_MOUSE	Crip2	Cysteine-rich protein 2	46428.7	29783.8	29743.5	19433.5	11078.8	11236.3	80189.1	99336.8	1.77201	1.13996	3.0081
sp|Q99LC3|NDUAA_MOUSE	Q99LC3	NDUAA_MOUSE	Ndufa10	NADH dehydrogenase [ubiquinone] 1 alpha subcomplex subunit 10, mitochondrial	55805.2	52436.8	39767	57166.3	13432	18275.6	40002.4	57385.8	1.77136	1.61216	1.61892
sp|Q91VT4|CBR4_MOUSE	Q91VT4	CBR4_MOUSE	Cbr4	Carbonyl reductase family member 4	60931.2	47781.4	38110.8	47170.3	15200.9	16965.4	43048.5	61477.5	1.7569	1.40668	1.70024
sp|Q3USH5|SFSWA_MOUSE	Q3USH5	SFSWA_MOUSE	Sfswap	Splicing factor, suppressor of white-apricot homolog	10782.4	7813.59	9525.41	3695.01	4364.1	1165.05	121436	181949	1.74986	1.25764	5.77795
sp|Q32MW3|ACO10_MOUSE	Q32MW3	ACO10_MOUSE	Acot10	Acyl-coenzyme A thioesterase 10, mitochondrial	68850.1	50467.8	40082.7	42268	17048.2	18802.7	45245	51271.8	1.73473	1.19977	1.42877
sp|Q91ZF0|DJC24_MOUSE	Q91ZF0	DJC24_MOUSE	Dnajc24	DnaJ homolog subfamily C member 24	39305.1	32597	25858	19510	9842.7	11837.7	77736.6	106476	1.72964	1.06528	3.08691
sp|Q8C0C7|SYFA_MOUSE	Q8C0C7	SYFA_MOUSE	Farsa	Phenylalanine--tRNA ligase alpha subunit	52907.2	47653.9	25663.6	30490.4	13703	16839.1	58910.3	87508.6	1.7192	0.878592	2.26123
sp|Q91WM2|CECR5_MOUSE	Q91WM2	CECR5_MOUSE	Cecr5	Cat eye syndrome critical region protein 5 homolog	60328.6	44645.6	48003.6	41101.2	14897.7	17488.2	49440.4	67640.4	1.6966	1.46014	1.85407
sp|Q8CAY6|THIC_MOUSE	Q8CAY6	THIC_MOUSE	Acat2	Acetyl-CoA acetyltransferase, cytosolic	38206.5	29068.7	29264.7	21916	9117.68	11681.7	81616.3	103436	1.69354	1.29906	3.15332
sp|Q922E6|FAKD2_MOUSE	Q922E6	FAKD2_MOUSE	Fastkd2	FAST kinase domain-containing protein 2	49122.4	37131.9	50358.5	69274.6	15858.7	10813	33701.3	42456.5	1.69329	2.16523	1.51368
sp|Q99MN9|PCCB_MOUSE	Q99MN9	PCCB_MOUSE	Pccb	Propionyl-CoA carboxylase beta chain, mitochondrial	60032.8	53429.5	44751.6	33380.1	15744.7	19417.1	52086.8	64039.9	1.69013	1.1519	1.72362
sp|Q9CQ20|M1IP1_MOUSE	Q9CQ20	M1IP1_MOUSE	Mid1ip1	Mid1-interacting protein 1	60864.3	61776.5	29548.9	40584.5	14878.8	23192.8	47713.1	57502.3	1.68765	0.881386	1.46656
sp|Q9R0M6|RAB9A_MOUSE	Q9R0M6	RAB9A_MOUSE	Rab9a	Ras-related protein Rab-9A	62289.7	48238.2	56680.2	30430.4	13063.6	21533.2	41314.3	65911.1	1.6757	1.33221	1.63194
sp|Q3TX08|TRM1_MOUSE	Q3TX08	TRM1_MOUSE	Trmt1	tRNA (guanine(26)-N(2))-dimethyltransferase	19970.9	24459.4	16573.1	11817.3	4064.79	9947.53	90847.7	154142	1.66485	1.01871	4.12796
sp|Q9R0P3|ESTD_MOUSE	Q9R0P3	ESTD_MOUSE	Esd	S-formylglutathione hydrolase	38358.6	25779.8	27364.5	18213.9	10381.8	9885.02	91451.1	111801	1.66207	1.16923	3.32608
sp|Q9CX48|ZCH10_MOUSE	Q9CX48	ZCH10_MOUSE	Zcchc10	Zinc finger CCHC domain-containing protein 10	24842.6	11924	17590.3	9623.5	4938.24	6694.46	109656	157808	1.66021	1.22615	4.52309
sp|P30681|HMGB2_MOUSE	P30681	HMGB2_MOUSE	Hmgb2	High mobility group protein B2	35885.7	23138.4	17948.8	14378.8	10232.6	8443.47	71110.6	156322	1.66011	0.791575	3.60617
sp|Q8BH04|PCKGM_MOUSE	Q8BH04	PCKGM_MOUSE	Pck2	Phosphoenolpyruvate carboxykinase [GTP], mitochondrial	63997.3	40611.1	46369.5	36247.3	15759.3	17477.7	54232.3	52493.1	1.65414	1.31364	1.68304
sp|Q9D2G2|ODO2_MOUSE	Q9D2G2	ODO2_MOUSE	Dlst	Dihydrolipoyllysine-residue succinyltransferase component of 2-oxoglutarate dehydrogenase complex, mitochondrial	136883	30766.8	23671.2	26437.6	29653.2	24103.5	25326.3	26136.1	1.64094	-0.101382	-0.0629266
sp|Q64152-2|BTF3_MOUSE	Q64152-2	BTF3_MOUSE	Btf3	Isoform 2 of Transcription factor BTF3	49901.7	60331.8	73156.4	30903.6	19192.6	16194.4	19377.6	16147.6	1.63927	1.55612	0.00562394
sp|Q80ZV0|RNH2B_MOUSE	Q80ZV0	RNH2B_MOUSE	Rnaseh2b	Ribonuclease H2 subunit B	30537	15596.4	26632.3	12555.5	7460.91	7408.73	89545.8	153833	1.63344	1.39804	4.03276
sp|Q8BIJ6|SYIM_MOUSE	Q8BIJ6	SYIM_MOUSE	Iars2	Isoleucine--tRNA ligase, mitochondrial	67335.2	53223.1	38455.5	38354.4	18181.5	20701.2	44336.5	54854.7	1.63253	0.982163	1.35108
sp|P48962|ADT1_MOUSE	P48962	ADT1_MOUSE	Slc25a4	ADP/ATP translocase 1	54424.8	45046.9	46393.7	54812.5	14705.9	17510.1	44604.1	52856.8	1.62651	1.65145	1.59705
sp|Q99KE1|MAOM_MOUSE	Q99KE1	MAOM_MOUSE	Me2	NAD-dependent malic enzyme, mitochondrial	58638.8	53678.6	44231.7	56366.9	15519.6	21314.9	42306.6	38104.5	1.60845	1.44948	1.12634
sp|Q3V300|KIF22_MOUSE	Q3V300	KIF22_MOUSE	Kif22	Kinesin-like protein KIF22	35106.1	32243.6	32352.9	16672.3	8710.6	13434.1	69172.6	136774	1.60471	1.14656	3.21724
sp|Q9CRB6|TPPP3_MOUSE	Q9CRB6	TPPP3_MOUSE	Tppp3	Tubulin polymerization-promoting protein family member 3	37377.6	24946.1	28028.9	15866.3	9650.9	10894.8	74294.6	129944	1.60094	1.09523	3.31335
sp|Q91YP2|NEUL_MOUSE	Q91YP2	NEUL_MOUSE	Nln	Neurolysin, mitochondrial	64982.9	52662.3	34840.7	44708.8	15838.8	22981.3	43630.5	52941.6	1.59957	1.03505	1.3148
sp|Q99MR8|MCCA_MOUSE	Q99MR8	MCCA_MOUSE	Mccc1	Methylcrotonoyl-CoA carboxylase subunit alpha, mitochondrial	83795.3	35896.1	49180.3	25407.5	20762.9	18757.2	59382.7	42902.3	1.59866	0.916353	1.37194
tr|E9Q7L0|E9Q7L0_MOUSE	E9Q7L0	E9Q7L0_MOUSE	Ogdhl	Protein Ogdhl	67484.1	59266.9	51168	41984.8	18388.5	23639.9	40414.7	38323.9	1.59256	1.14824	0.905708
sp|Q922Q4|P5CR2_MOUSE	Q922Q4	P5CR2_MOUSE	Pycr2	Pyrroline-5-carboxylate reductase 2	72597.2	43221.5	47074.6	34914.6	21014.1	17442.8	49292.4	48406.4	1.59055	1.09219	1.3451
sp|P19783|COX41_MOUSE	P19783	COX41_MOUSE	Cox4i1	Cytochrome c oxidase subunit 4 isoform 1, mitochondrial	45508.4	58052.8	34464.6	71953.1	10303.1	24316.1	27754.6	47025.8	1.58084	1.6201	1.11109
sp|Q8BWT1|THIM_MOUSE	Q8BWT1	THIM_MOUSE	Acaa2	3-ketoacyl-CoA thiolase, mitochondrial	52226.2	48406.2	48714.6	36160.9	16249.7	17400.3	48684.1	74704.6	1.58042	1.33474	1.87453
sp|Q5SWU9|ACACA_MOUSE	Q5SWU9	ACACA_MOUSE	Acaca	Acetyl-CoA carboxylase 1	63043.2	45831.8	43953.3	31147.1	17990.8	18505.7	62242.4	55449.5	1.57684	1.04106	1.68919
sp|Q8JZN5|ACAD9_MOUSE	Q8JZN5	ACAD9_MOUSE	Acad9	Acyl-CoA dehydrogenase family member 9, mitochondrial	49655.7	54861.3	41154	48929.8	14766.7	20541.6	43836.9	57584.9	1.56566	1.35126	1.52229
sp|Q8VE38|OXND1_MOUSE	Q8VE38	OXND1_MOUSE	Oxnad1	Oxidoreductase NAD-binding domain-containing protein 1	54996.9	49417.3	43911.4	43772	15572.7	19989.6	56319.9	46106.4	1.5539	1.30196	1.52617
sp|Q9CQH3|NDUB5_MOUSE	Q9CQH3	NDUB5_MOUSE	Ndufb5	NADH dehydrogenase [ubiquinone] 1 beta subcomplex subunit 5, mitochondrial	30221.4	57743.2	35578.1	71315.1	13837.7	16311.5	33368.3	60113.5	1.5448	1.82598	1.63256
sp|Q9DBL1|ACDSB_MOUSE	Q9DBL1	ACDSB_MOUSE	Acadsb	Short/branched chain specific acyl-CoA dehydrogenase, mitochondrial	61233.5	45139.9	43136.3	41159	16256.5	20386.6	51864.2	54963.4	1.53752	1.20191	1.54367
tr|E9Q368|E9Q368_MOUSE	E9Q368	E9Q368_MOUSE	Gm17296	Protein Gm17296	89393.4	58034.6	41944.2	38746.4	23757.6	27082.2	25458.2	29582.6	1.53598	0.666442	0.114543
sp|Q07417|ACADS_MOUSE	Q07417	ACADS_MOUSE	Acads	Short-chain specific acyl-CoA dehydrogenase, mitochondrial	36890	77617	14173.4	7593.63	23822	15697.2	36200.1	148259	1.53481	-0.860413	2.22268
sp|Q9CRC8|LRC40_MOUSE	Q9CRC8	LRC40_MOUSE	Lrrc40	Leucine-rich repeat-containing protein 40	32695.4	21680.7	22876.1	16438.3	10964	8002.91	80797.8	128103	1.51949	1.05157	3.46126
sp|Q14CH7|SYAM_MOUSE	Q14CH7	SYAM_MOUSE	Aars2	Alanine--tRNA ligase, mitochondrial	55137.1	50196	40901.1	39031.8	17127.6	19662.3	48475.3	62310.8	1.51758	1.11948	1.59039
sp|Q8K411|PREP_MOUSE	Q8K411	PREP_MOUSE	Pitrm1	Presequence protease, mitochondrial	49687.1	50025.2	47499.2	43061.3	15499.6	19421.5	50352.5	59784.6	1.51367	1.37478	1.65713
sp|Q811I0|ATPF1_MOUSE	Q811I0	ATPF1_MOUSE	Atpaf1	ATP synthase mitochondrial F1 complex assembly factor 1	56288.9	58070.5	41683.4	44915.9	18079.6	22031.3	41869.2	50773.7	1.51151	1.11036	1.20769
sp|Q9CPQ1|COX6C_MOUSE	Q9CPQ1	COX6C_MOUSE	Cox6c	Cytochrome c oxidase subunit 6C	30443.4	55155.8	107380	50817.4	13275.9	17271.3	23590.9	38611	1.48656	2.37262	1.02592
sp|Q99L13|3HIDH_MOUSE	Q99L13	3HIDH_MOUSE	Hibadh	3-hydroxyisobutyrate dehydrogenase, mitochondrial	60875.5	53758.9	46292.5	42224.3	18115.6	22887.7	38464.4	52656.6	1.48323	1.11021	1.15204
sp|P47738|ALDH2_MOUSE	P47738	ALDH2_MOUSE	Aldh2	Aldehyde dehydrogenase, mitochondrial	56516.2	51249.4	40624.8	42000.7	17699.2	21246.7	47332.7	54896.8	1.46835	1.08511	1.39227
sp|Q8K1J6|TRNT1_MOUSE	Q8K1J6	TRNT1_MOUSE	Trnt1	CCA tRNA nucleotidyltransferase 1, mitochondrial	55508	35333.9	32277.3	31067.7	16258	16819.6	55784.6	75775	1.45751	0.937379	1.99179
sp|Q9WTQ5|AKA12_MOUSE	Q9WTQ5	AKA12_MOUSE	Akap12	A-kinase anchor protein 12	47956.4	49914.3	30281.9	37520.7	13322.9	22714.4	45957.9	76456.3	1.44139	0.91185	1.76421
sp|Q8CFA2|GCST_MOUSE	Q8CFA2	GCST_MOUSE	Amt	Aminomethyltransferase, mitochondrial	58900.1	48378.5	37426.7	40917.2	19722	19790.9	47744.4	51312.1	1.44097	0.987496	1.32593
sp|Q921G7|ETFD_MOUSE	Q921G7	ETFD_MOUSE	Etfdh	Electron transfer flavoprotein-ubiquinone oxidoreductase, mitochondrial	43071.2	56538.3	42138.3	44042	15701.7	21251	48468.9	60155	1.4306	1.22168	1.55559
sp|Q8K3F7|TDH_MOUSE	Q8K3F7	TDH_MOUSE	Tdh	L-threonine 3-dehydrogenase, mitochondrial	48817.8	59311.3	40083	44246.7	15640.1	24825.2	44099.7	60082.3	1.418	1.05936	1.36435
sp|Q60759|GCDH_MOUSE	Q60759	GCDH_MOUSE	Gcdh	Glutaryl-CoA dehydrogenase, mitochondrial	41957.7	53662.4	41918.4	41274.6	15429.9	20503.5	44107	74800.3	1.41199	1.21114	1.72644
sp|Q9QWT9|KIFC1_MOUSE	Q9QWT9	KIFC1_MOUSE	Kifc1	Kinesin-like protein KIFC1	27768.2	25987.6	24027.8	14848.3	11660.2	8553.14	68026.1	162280	1.41111	0.943575	3.51017
tr|B2RQG2|B2RQG2_MOUSE	B2RQG2	B2RQG2_MOUSE	Phf3	PHD finger protein 3	24027.7	9557.47	9145.75	8906.73	6709.21	5951.27	114988	140597	1.40749	0.511865	4.3354
sp|Q99MX1|UBP26_MOUSE	Q99MX1	UBP26_MOUSE	Usp26	Ubiquitin carboxyl-terminal hydrolase 26	29510.6	31502.1	36508.7	22618.2	11243.7	11831.2	78723.2	117453	1.40279	1.35749	3.08775
sp|Q9WUR2|ECI2_MOUSE	Q9WUR2	ECI2_MOUSE	Eci2	Enoyl-CoA delta isomerase 2, mitochondrial	65485.6	45162.8	49811.4	40824	19453	22484.1	44480.4	43114.2	1.39968	1.11185	1.06261
sp|P16858|G3P_MOUSE	P16858	G3P_MOUSE	Gapdh	Glyceraldehyde-3-phosphate dehydrogenase	38957.2	43548.2	43118.6	23073.4	15009.1	16358.7	56305.5	77492.7	1.3952	1.07737	2.0927
sp|Q8VHK9|DHX36_MOUSE	Q8VHK9	DHX36_MOUSE	Dhx36	ATP-dependent RNA helicase DHX36	31848.1	25587	34403.9	13919.6	9198.99	12726.7	85691.3	105486	1.38931	1.14011	3.12422
sp|P42125|ECI1_MOUSE	P42125	ECI1_MOUSE	Eci1	Enoyl-CoA delta isomerase 1, mitochondrial	34252.2	65347.6	39188.2	47331.5	13652.1	24399.1	41708.8	63423.8	1.3882	1.18509	1.4662
sp|Q9EQ20|MMSA_MOUSE	Q9EQ20	MMSA_MOUSE	Aldh6a1	Methylmalonate-semialdehyde dehydrogenase [acylating], mitochondrial	60959	58928	49016.8	38190.5	20715.7	25153	37167.3	41041	1.38609	0.926936	0.769809
sp|Q8BJY1|PSMD5_MOUSE	Q8BJY1	PSMD5_MOUSE	Psmd5	26S proteasome non-ATPase regulatory subunit 5	33492.5	35512.2	55439.1	22362.9	12434.8	14066.8	56115.7	100839	1.38062	1.55373	2.5662
sp|Q9Z2Z9|GFPT2_MOUSE	Q9Z2Z9	GFPT2_MOUSE	Gfpt2	Glutamine--fructose-6-phosphate aminotransferase [isomerizing] 2	63455.8	37808.7	46521.7	27140.4	20763.5	18168	52497.4	69335.3	1.37912	0.919986	1.64589
sp|P58064|RT06_MOUSE	P58064	RT06_MOUSE	Mrps6	28S ribosomal protein S6, mitochondrial	24281	38571.2	45177.2	102667	11982.1	12349.1	23400.1	35017.3	1.36916	2.6032	1.2636
sp|Q3U2A8|SYVM_MOUSE	Q3U2A8	SYVM_MOUSE	Vars2	Valine--tRNA ligase, mitochondrial	55325	54041.5	45682.4	42537.5	20095.5	22300.4	45848	46810.5	1.36718	1.05718	1.128
sp|Q5RKZ7|MOCS1_MOUSE	Q5RKZ7	MOCS1_MOUSE	Mocs1	Molybdenum cofactor biosynthesis protein 1	70651	46024.9	24819.7	33140.3	23217.4	22084.1	49128.6	48489.8	1.36488	0.3555	1.10759
sp|O55236|MCE1_MOUSE	O55236	MCE1_MOUSE	Rngtt	mRNA-capping enzyme	20762.3	14207.2	21998.6	18042.3	5877.84	7725.26	99179.7	147538	1.36216	1.55754	4.18086
sp|Q9WVB0|RBPMS_MOUSE	Q9WVB0	RBPMS_MOUSE	Rbpms	RNA-binding protein with multiple splicing	13160.5	22841.7	14892.8	7635.32	6774.24	7257.91	76631.7	178378	1.35935	0.682994	4.18374
sp|Q62393|TPD52_MOUSE	Q62393	TPD52_MOUSE	Tpd52	Tumor protein D52	76003.2	39502.9	49645.7	45400	24524.1	20566.4	18531.7	16827.8	1.35707	1.0758	-0.350727
sp|P10639|THIO_MOUSE	P10639	THIO_MOUSE	Txn	Thioredoxin	38787.2	25166.9	22577	18337.4	13206.7	11822.4	77654.4	121109	1.35343	0.709004	2.98937
sp|Q3UQA7|SELH_MOUSE	Q3UQA7	SELH_MOUSE	Selh	Selenoprotein H	16198	21524.8	25405.2	11340.4	8465.37	6341.58	94091.6	156835	1.34916	1.3113	4.08292
sp|Q6P3A8|ODBB_MOUSE	Q6P3A8	ODBB_MOUSE	Bckdhb	2-oxoisovalerate dehydrogenase subunit beta, mitochondrial	56339.6	50549	41059.7	39740.8	16041.6	26048.9	41413.5	62490.7	1.34454	0.940871	1.30369
sp|O88874|CCNK_MOUSE	O88874	CCNK_MOUSE	Ccnk	Cyclin-K	22019.3	19394.6	24176.5	13313.8	8899.93	7420.89	87320.4	156874	1.3434	1.19981	3.90325
sp|P70677|CASP3_MOUSE	P70677	CASP3_MOUSE	Casp3	Caspase-3	48474	36640.5	32959	23542.7	15618.5	17932.9	61796.3	91182.1	1.34303	0.751919	2.18888
sp|P51174|ACADL_MOUSE	P51174	ACADL_MOUSE	Acadl	Long-chain specific acyl-CoA dehydrogenase, mitochondrial	48954.3	50864.2	46248	39930.3	18982.7	20536.2	51218.7	54765.6	1.33677	1.12478	1.42324
sp|Q9D1L0|CHCH2_MOUSE	Q9D1L0	CHCH2_MOUSE	Chchd2	Coiled-coil-helix-coiled-coil-helix domain-containing protein 2, mitochondrial	45786.6	55861.4	35829.4	45970.2	11930.9	28370.2	37365.8	78834.2	1.33469	1.02127	1.52772
tr|E9Q4Z2|E9Q4Z2_MOUSE	E9Q4Z2	E9Q4Z2_MOUSE	Acacb	Protein Acacb	58784.9	45382	37227	36444	17550.3	24113.7	55396.9	55554.9	1.32202	0.822297	1.41306
sp|Q69ZR9|F208A_MOUSE	Q69ZR9	F208A_MOUSE	Fam208a	Protein FAM208A	31630.6	25809.4	38566.2	15045.6	10405.2	12664.8	83669.4	117055	1.31604	1.21653	3.12112
sp|Q3U186|SYRM_MOUSE	Q3U186	SYRM_MOUSE	Rars2	Probable arginine--tRNA ligase, mitochondrial	63630	44297.2	40754	34831.2	23019.4	20430.9	43278.2	56757.4	1.31262	0.798736	1.20307
sp|Q8QZT1|THIL_MOUSE	Q8QZT1	THIL_MOUSE	Acat1	Acetyl-CoA acetyltransferase, mitochondrial	60724.4	46086.4	42686.8	40358.8	20055.5	23247.8	41747.1	55024.7	1.30251	0.939428	1.16011
sp|P83917|CBX1_MOUSE	P83917	CBX1_MOUSE	Cbx1	Chromobox protein homolog 1	61560	51255.3	61512.2	29220.1	20504.2	25350.6	28690.4	41433.3	1.29882	0.984546	0.612831
sp|O88574|SAP30_MOUSE	O88574	SAP30_MOUSE	Sap30	Histone deacetylase complex subunit SAP30	24859.5	18356.5	33292.8	12684	7516.73	10532.9	86452.1	151793	1.2596	1.34894	3.72241
sp|Q9DB20|ATPO_MOUSE	Q9DB20	ATPO_MOUSE	Atp5o	ATP synthase subunit O, mitochondrial	60523.5	52892.4	31771.5	39769.7	20423.2	27023	43194.1	47555.1	1.25726	0.592484	0.935596
sp|Q8R3F9|STPAP_MOUSE	Q8R3F9	STPAP_MOUSE	Tut1	Speckle targeted PIP5K1A-regulated poly(A) polymerase	53055.2	52632.4	36052.3	29169	20822.9	23390.3	41498.6	61576.1	1.25726	0.560863	1.22114
sp|Q9Z1P6|NDUA7_MOUSE	Q9Z1P6	NDUA7_MOUSE	Ndufa7	NADH dehydrogenase [ubiquinone] 1 alpha subcomplex subunit 7	36211.2	53329.2	88785.6	42759.8	15847.2	22101.1	37892	27095.6	1.2385	1.79345	0.776128
sp|Q91VM9|IPYR2_MOUSE	Q91VM9	IPYR2_MOUSE	Ppa2	Inorganic pyrophosphatase 2, mitochondrial	39833.8	41597.6	29709.5	41429.1	16206.3	18378.8	60646.2	70046.9	1.23543	1.04048	1.91796
sp|Q8CHT0|AL4A1_MOUSE	Q8CHT0	AL4A1_MOUSE	Aldh4a1	Delta-1-pyrroline-5-carboxylate dehydrogenase, mitochondrial	44070.3	46691.9	45890.3	44007.6	17815.8	20734.9	48506.1	69609.8	1.23533	1.22153	1.61537
sp|Q9CWT6|DDX28_MOUSE	Q9CWT6	DDX28_MOUSE	Ddx28	Probable ATP-dependent RNA helicase DDX28	16836.9	18771	72224.1	137728	6371.48	8787.03	13861.4	25370.1	1.23207	3.79186	1.37188
sp|Q3UV17|K22O_MOUSE	Q3UV17	K22O_MOUSE	Krt76	Keratin, type II cytoskeletal 2 oral	94762.9	47377.5	70461.5	21670.3	23532.9	37143.7	20940.8	21598.9	1.22811	0.602561	-0.512328
sp|Q9WUM5|SUCA_MOUSE	Q9WUM5	SUCA_MOUSE	Suclg1	Succinyl-CoA ligase [ADP/GDP-forming] subunit alpha, mitochondrial	58534.8	58178.5	28925	36329.6	24366.5	25552.5	35570.5	58905.2	1.22531	0.386489	0.920353
sp|Q8BK67|RCC2_MOUSE	Q8BK67	RCC2_MOUSE	Rcc2	Protein RCC2	38133.3	29077.2	24208.9	18385.8	15876.2	12961.3	80540.4	98785.4	1.22074	0.562727	2.63656
sp|P54071|IDHP_MOUSE	P54071	IDHP_MOUSE	Idh2	Isocitrate dehydrogenase [NADP], mitochondrial	59294.5	50080.2	43347.9	39142.8	24683.5	22247.9	39051.5	44980.5	1.22065	0.813679	0.840386
sp|Q61578|ADRO_MOUSE	Q61578	ADRO_MOUSE	Fdxr	NADPH:adrenodoxin oxidoreductase, mitochondrial	55099.2	41123.8	51016	39447.1	19271.7	22033.8	52648	50955.4	1.22005	1.13099	1.32666
sp|Q8BVN4|MTER2_MOUSE	Q8BVN4	MTER2_MOUSE	Mterf4	Transcription termination factor 4, mitochondrial	21308	21243.3	93341.5	115504	9247.92	9096.75	18679	31808.1	1.21384	3.509	1.46055
sp|P62077|TIM8B_MOUSE	P62077	TIM8B_MOUSE	Timm8b	Mitochondrial import inner membrane translocase subunit Tim8 B	30503.4	47735.5	30724.8	48649.3	13852.3	19893	34745.9	78995.7	1.2132	1.23398	1.753
sp|Q9CQQ7|AT5F1_MOUSE	Q9CQQ7	AT5F1_MOUSE	Atp5f1	ATP synthase F(0) complex subunit B1, mitochondrial	51808.4	45810.6	39746.1	42864.5	17646.3	24542	49139.3	55701.6	1.21032	0.969483	1.31329
sp|Q8C854|MYEF2_MOUSE	Q8C854	MYEF2_MOUSE	Myef2	Myelin expression factor 2	18857.8	17432	13746.7	11407.7	8087.99	7596.8	90406	137813	1.2102	0.681443	3.86298
sp|A2ATU0|DHTK1_MOUSE	A2ATU0	DHTK1_MOUSE	Dhtkd1	Probable 2-oxoglutarate dehydrogenase E1 component DHKTD1, mitochondrial	59461.6	51593.5	25839.7	41499	21644.9	26761.4	40766.7	54544.6	1.19801	0.476239	0.977451
sp|Q9CQV5|RT24_MOUSE	Q9CQV5	RT24_MOUSE	Mrps24	28S ribosomal protein S24, mitochondrial	16429.3	36800.4	35851.1	94283.7	10556.3	12681.8	32307.4	57030.9	1.19573	2.48544	1.94278
sp|Q6NXI6|RPRD2_MOUSE	Q6NXI6	RPRD2_MOUSE	Rprd2	Regulation of nuclear pre-mRNA domain-containing protein 2	16938.1	22486.9	17088.9	17629.4	8088.62	9143.28	95364.8	148245	1.19403	1.01062	3.82142
sp|Q9Z2X1|HNRPF_MOUSE	Q9Z2X1	HNRPF_MOUSE	Hnrnpf	Heterogeneous nuclear ribonucleoprotein F	34033.4	18562.5	15841.3	11841.2	11398.7	11613	57996.5	87125.6	1.19258	0.26661	2.65683
sp|Q91W43|GCSP_MOUSE	Q91W43	GCSP_MOUSE	Gldc	Glycine dehydrogenase (decarboxylating), mitochondrial	42640	51975.4	39986.4	47073.4	20080.1	21356.2	44260.1	48487.4	1.19118	1.07111	1.16241
sp|Q91VR2|ATPG_MOUSE	Q91VR2	ATPG_MOUSE	Atp5c1	ATP synthase subunit gamma, mitochondrial	44495.8	59705.6	34051	52050.5	17715.9	28094.8	36385.7	44728.8	1.18562	0.910355	0.824277
sp|Q99KS2|NGRN_MOUSE	Q99KS2	NGRN_MOUSE	Ngrn	Neugrin	35110.9	28284	54099.5	96066.4	11830.2	16416	24182.2	36767.1	1.16631	2.41043	1.10955
sp|Q01320|TOP2A_MOUSE	Q01320	TOP2A_MOUSE	Top2a	DNA topoisomerase 2-alpha	49396.2	34561.1	37544.1	27017.8	20026.3	17713.3	55839.3	81487.5	1.15357	0.774604	1.86346
tr|D3YWX2|D3YWX2_MOUSE	D3YWX2	D3YWX2_MOUSE	Ylpm1	YLP motif-containing protein 1	11790.8	9566.6	10297.4	7155.66	5644.65	3963.31	117460	171956	1.15243	0.861176	4.91277
sp|P61514|RL37A_MOUSE	P61514	RL37A_MOUSE	Rpl37a	60S ribosomal protein L37a	42765.7	58180.4	62894.1	33407.9	21335	24153.8	20865.6	22788.9	1.15	1.08205	-0.0593822
sp|Q9Z2I9|SUCB1_MOUSE	Q9Z2I9	SUCB1_MOUSE	Sucla2	Succinyl-CoA ligase [ADP-forming] subunit beta, mitochondrial	56756.4	48224.2	37125.9	40780.5	22980.5	24480.1	39545.6	52500.5	1.14532	0.71501	0.955625
sp|Q9DCW4|ETFB_MOUSE	Q9DCW4	ETFB_MOUSE	Etfb	Electron transfer flavoprotein subunit beta	59163.2	45070.1	42708.8	36937.1	24090.3	23048.9	46409.7	45152.9	1.14482	0.756672	0.957831
sp|Q8C2E4|PTCD1_MOUSE	Q8C2E4	PTCD1_MOUSE	Ptcd1	Pentatricopeptide repeat-containing protein 1, mitochondrial	26182.6	22354	74700.6	114558	10966.8	10994.2	25200.9	28191.1	1.14413	3.10735	1.28168
sp|Q9DCX2|ATP5H_MOUSE	Q9DCX2	ATP5H_MOUSE	Atp5h	ATP synthase subunit d, mitochondrial	50300.4	46515.5	33717.6	58046.1	18463.7	25442.1	41265.2	38173.5	1.14083	1.06351	0.855431
sp|Q9D2E2|TOE1_MOUSE	Q9D2E2	TOE1_MOUSE	Toe1	Target of EGR1 protein 1	19744.6	18618.1	16877	14356.7	8315.16	9141.82	100464	157110	1.1359	0.839296	3.88311
sp|P20108|PRDX3_MOUSE	P20108	PRDX3_MOUSE	Prdx3	Thioredoxin-dependent peroxide reductase, mitochondrial	52699.3	49822.6	39335.7	41884.4	21428.3	25261.2	46415.1	49614.8	1.13476	0.798742	1.04039
sp|Q91YM4|TBRG4_MOUSE	Q91YM4	TBRG4_MOUSE	Tbrg4	Protein TBRG4	53812.5	46688.3	41226.9	44834.8	21975.6	23854.6	38669.7	44954.4	1.13283	0.909071	0.867618
tr|E9QNN1|E9QNN1_MOUSE	E9QNN1	E9QNN1_MOUSE	Dhx9	ATP-dependent RNA helicase A	18874.7	16925.7	17183.8	11420.5	8740.46	7915.05	85157.5	153776	1.10397	0.780234	3.84254
sp|Q8BFP9|PDK1_MOUSE	Q8BFP9	PDK1_MOUSE	Pdk1	[Pyruvate dehydrogenase (acetyl-transferring)] kinase isozyme 1, mitochondrial	47610.4	53027.1	39757.6	37971.3	22690.6	24631.2	35338	68185.6	1.08859	0.715947	1.12938
sp|Q9CQM9|GLRX3_MOUSE	Q9CQM9	GLRX3_MOUSE	Glrx3	Glutaredoxin-3	34354.3	29161.2	39640	15433	9512.63	20652.3	83172.1	98313.6	1.07424	0.868474	2.58891
sp|Q8K1R3|PNPT1_MOUSE	Q8K1R3	PNPT1_MOUSE	Pnpt1	Polyribonucleotide nucleotidyltransferase 1, mitochondrial	50881.2	46881.6	41709.2	48217.4	18429.6	28442.9	36298.3	51714.1	1.06054	0.940004	0.908964
sp|Q9D0L7|ARM10_MOUSE	Q9D0L7	ARM10_MOUSE	Armc10	Armadillo repeat-containing protein 10	45061.9	42827.6	34501.8	50814.1	17579.6	24644.8	43283	44085.9	1.05761	1.01474	1.04904
sp|P02535|K1C10_MOUSE	P02535	K1C10_MOUSE	Krt10	Keratin, type I cytoskeletal 10	45767.6	73928.1	103333	25093.6	18978.5	38821.2	12943.2	36287.2	1.05024	1.15181	-0.231512
sp|Q9Z2I8|SUCB2_MOUSE	Q9Z2I8	SUCB2_MOUSE	Suclg2	Succinyl-CoA ligase [GDP-forming] subunit beta, mitochondrial	32058.9	33480.1	21932.2	35875.2	13043.3	18607.5	66255.6	106840	1.05011	0.869014	2.45125
sp|Q8BFR5|EFTU_MOUSE	Q8BFR5	EFTU_MOUSE	Tufm	Elongation factor Tu, mitochondrial	63393.3	42116.6	42070.9	38115.5	24345	26667.6	43270.5	38556.4	1.04845	0.652501	0.68172
sp|P50544|ACADV_MOUSE	P50544	ACADV_MOUSE	Acadvl	Very long-chain specific acyl-CoA dehydrogenase, mitochondrial	55574.4	44569.2	46536.9	40403	21565.1	27056	43284.9	42783.4	1.04242	0.838438	0.823902
sp|O09111|NDUBB_MOUSE	O09111	NDUBB_MOUSE	Ndufb11	NADH dehydrogenase [ubiquinone] 1 beta subcomplex subunit 11, mitochondrial	18047.8	61432.7	31003.3	70208.9	14337.4	24513.2	34587.5	58570.9	1.03267	1.38138	1.26175
sp|P01867|IGG2B_MOUSE	P01867	IGG2B_MOUSE	Igh-3	Ig gamma-2B chain C region	33383.2	52439.6	70183.8	37645.3	18016.6	23939	38303.6	48768.4	1.0325	1.36181	1.05334
tr|Q921K2|Q921K2_MOUSE	Q921K2	Q921K2_MOUSE	Parp1	Poly (ADP-ribose) polymerase family, member 1	32236.6	23959.5	21513.4	17880.3	13863.2	13632.2	78677.1	117749	1.03128	0.518777	2.83672
sp|Q8VC19|HEM1_MOUSE	Q8VC19	HEM1_MOUSE	Alas1	5-aminolevulinate synthase, nonspecific, mitochondrial	62263.4	57798.6	13394.8	21343.2	40442.8	18615.2	40979.6	55704.1	1.02358	-0.765618	0.711141
sp|P07091|S10A4_MOUSE	P07091	S10A4_MOUSE	S100a4	Protein S100-A4	29330.7	65346.5	71532.3	36829.9	16907.6	29682.8	21395.1	22272	1.02298	1.21776	-0.0934854
sp|Q3V3R1|C1TM_MOUSE	Q3V3R1	C1TM_MOUSE	Mthfd1l	Monofunctional C1-tetrahydrofolate synthase, mitochondrial	41727.1	48438.5	42476.3	42732.5	20750.1	23655.6	50540.1	53836.6	1.02183	0.94026	1.23299
sp|P97807|FUMH_MOUSE	P97807	FUMH_MOUSE	Fh	Fumarate hydratase, mitochondrial	44224.1	51050.1	43521.6	40238.9	20950	26184.5	39419.1	53253.2	1.0153	0.829486	0.975354
sp|P32067|LA_MOUSE	P32067	LA_MOUSE	Ssb	Lupus La protein homolog	17370.1	15244.8	14720.7	9571.9	8263.67	7941.17	88249.8	182512	1.00911	0.584089	4.06253
sp|Q9Z2Q5|RM40_MOUSE	Q9Z2Q5	RM40_MOUSE	Mrpl40	39S ribosomal protein L40, mitochondrial	18751.9	13804.1	100653	134488	6527.28	9671.45	11106.7	17076.4	1.00704	3.85957	0.79895
sp|O88986|KBL_MOUSE	O88986	KBL_MOUSE	Gcat	2-amino-3-ketobutyrate coenzyme A ligase, mitochondrial	60809.2	54657.5	42809.8	28727.5	27207.6	30541.4	30313.3	63307.3	0.999608	0.308898	0.697029
sp|Q00623|APOA1_MOUSE	Q00623	APOA1_MOUSE	Apoa1	Apolipoprotein A-I	51707.6	42624.6	83871.9	20612	22481.4	25103.6	28434.5	34086.3	0.987242	1.1347	0.393829
sp|Q64433|CH10_MOUSE	Q64433	CH10_MOUSE	Hspe1	10 kDa heat shock protein, mitochondrial	52831.5	49598.5	36498.1	39488.1	24466.3	27573.1	37776.8	48397.2	0.976961	0.546133	0.727647
sp|Q9JLF6|TGM1_MOUSE	Q9JLF6	TGM1_MOUSE	Tgm1	Protein-glutamine gamma-glutamyltransferase K	56077.2	51666.7	120215	20024.7	22717.6	32164.1	17867.3	29076.7	0.97321	1.35349	-0.225384
sp|Q9ERU9|RBP2_MOUSE	Q9ERU9	RBP2_MOUSE	Ranbp2	E3 SUMO-protein ligase RanBP2	75341.7	46155.6	32657.3	31032.9	30261.4	31852.9	28354.1	27179.3	0.967927	0.0361461	-0.161571
sp|Q99KI0|ACON_MOUSE	Q99KI0	ACON_MOUSE	Aco2	Aconitate hydratase, mitochondrial	57031.4	43498.9	42765.7	40568.3	26326.2	25095.3	39477.6	40520.6	0.967186	0.696532	0.637595
sp|P27659|RL3_MOUSE	P27659	RL3_MOUSE	Rpl3	60S ribosomal protein L3	53347.8	56010.6	42433.4	22998.3	30507.8	25627.2	27691	48149.3	0.962092	0.22109	0.434064
sp|Q8R2Q4|RRF2M_MOUSE	Q8R2Q4	RRF2M_MOUSE	Gfm2	Ribosome-releasing factor 2, mitochondrial	53301.6	44046.7	41762.9	40608.1	23196.4	26873.7	42711.6	51034.4	0.959208	0.718188	0.90481
sp|D3Z7P3|GLSK_MOUSE	D3Z7P3	GLSK_MOUSE	Gls	Glutaminase kidney isoform, mitochondrial	39325.2	40915.1	50686.5	31371.3	18487.5	22789.9	43709.6	63533.8	0.958977	0.991292	1.37747
sp|Q9DCU6|RM04_MOUSE	Q9DCU6	RM04_MOUSE	Mrpl4	39S ribosomal protein L4, mitochondrial	8883.91	11976.6	56293.5	161616	5182.97	5567.61	10337.1	16817	0.956358	4.34124	1.33676
sp|Q9CWY4|GEMI7_MOUSE	Q9CWY4	GEMI7_MOUSE	Gemin7	Gem-associated protein 7	17367.3	12563.3	8169.63	8388.54	11735.9	3695.97	99038.1	190011	0.955711	0.101634	4.22734
sp|Q9D3U0|PUS10_MOUSE	Q9D3U0	PUS10_MOUSE	Pus10	Putative tRNA pseudouridine synthase Pus10	37734.1	27498.9	30815.7	19067.6	16981.1	16774.5	70030.5	100452	0.950474	0.56343	2.33643
sp|P34884|MIF_MOUSE	P34884	MIF_MOUSE	Mif	Macrophage migration inhibitory factor	17374.4	28561.4	34715.8	17535.5	9871.42	13964.1	60902.4	175567	0.946505	1.13235	3.31047
sp|Q8BH50|CR025_MOUSE	Q8BH50	CR025_MOUSE	>sp|Q8BH50|CR025_MOUSE	n/a	31554.2	38630.9	25819.3	17318.9	14390.8	22096.5	64717.5	97512.9	0.943772	0.241573	2.15258
sp|B1AR13|CISD3_MOUSE	B1AR13	CISD3_MOUSE	Cisd3	CDGSH iron-sulfur domain-containing protein 3, mitochondrial	47669.6	46671.5	47679.2	42430.6	22166.7	28234.8	40062.1	45271.8	0.904419	0.838218	0.759652
sp|Q80YD1|SUV3_MOUSE	Q80YD1	SUV3_MOUSE	Supv3l1	ATP-dependent RNA helicase SUPV3L1, mitochondrial	49724.6	42241.9	45393.6	40125.8	24194.6	25234.6	46417.6	47411.7	0.895745	0.790887	0.924673
sp|Q8R3K3|PTCD2_MOUSE	Q8R3K3	PTCD2_MOUSE	Ptcd2	Pentatricopeptide repeat-containing protein 2, mitochondrial	48555.4	48767.5	40091	49561.4	23190.7	29445.5	34490.4	36141.7	0.886722	0.768284	0.424266
sp|Q6PB66|LPPRC_MOUSE	Q6PB66	LPPRC_MOUSE	Lrpprc	Leucine-rich PPR motif-containing protein, mitochondrial	39715.5	42187.1	45171.7	54563.7	19734.2	24579.6	32597.3	41075.5	0.886156	1.17035	0.733378
sp|Q9WTK5|NFKB2_MOUSE	Q9WTK5	NFKB2_MOUSE	Nfkb2	Nuclear factor NF-kappa-B p100 subunit	48767.6	46421	48248.9	33950.7	26080.2	25439.6	32010.7	40765.5	0.88566	0.674004	0.49834
sp|Q3U487|HECD3_MOUSE	Q3U487	HECD3_MOUSE	Hectd3	E3 ubiquitin-protein ligase HECTD3	48085.1	56930.8	117567	19285.1	21855.1	35105.4	18074	30717.4	0.882574	1.26459	-0.223335
sp|Q8BJL0|SMAL1_MOUSE	Q8BJL0	SMAL1_MOUSE	Smarcal1	SWI/SNF-related matrix-associated actin-dependent regulator of chromatin subfamily A-like protein 1	50474.6	35600.6	31029.9	34658.6	19885.8	27071.1	49167.9	66905.7	0.874261	0.484303	1.30563
sp|Q8K5B2|MCFD2_MOUSE	Q8K5B2	MCFD2_MOUSE	Mcfd2	Multiple coagulation factor deficiency protein 2 homolog	66818.2	60198	17712.3	16266.2	39837.4	29494.6	29798.9	35330.3	0.873417	-1.0289	-0.0902185
sp|Q9D902|T2EB_MOUSE	Q9D902	T2EB_MOUSE	Gtf2e2	General transcription factor IIE subunit 2	43404.5	35780.2	31998.1	27841.8	18365.6	24936.6	49325	88286.8	0.870782	0.466665	1.66809
sp|P70372|ELAV1_MOUSE	P70372	ELAV1_MOUSE	Elavl1	ELAV-like protein 1	21250.7	19842.9	22375.9	13152.1	12136.8	10420	83264.8	131945	0.865345	0.655389	3.25411
sp|P18155|MTDC_MOUSE	P18155	MTDC_MOUSE	Mthfd2	Bifunctional methylenetetrahydrofolate dehydrogenase/cyclohydrolase, mitochondrial	53037.2	41863.2	47970.9	39546.4	24975.9	27129.6	39397.4	49046.2	0.864977	0.748131	0.763321
sp|Q9D051|ODPB_MOUSE	Q9D051	ODPB_MOUSE	Pdhb	Pyruvate dehydrogenase E1 component subunit beta, mitochondrial	56296.2	47762.7	40782.6	38559.5	27007.9	30126.7	39383.6	35279.4	0.864961	0.47372	0.386026
sp|P27612|PLAP_MOUSE	P27612	PLAP_MOUSE	Plaa	Phospholipase A-2-activating protein	41011.3	33858.8	29112.6	24701.7	19351.7	21854.3	64970.6	82342	0.861535	0.385133	1.83795
sp|Q9QUR7|PIN1_MOUSE	Q9QUR7	PIN1_MOUSE	Pin1	Peptidyl-prolyl cis-trans isomerase NIMA-interacting 1	38085.8	23795	31799.5	25550.1	20972.4	13250.3	71485.5	80948.3	0.854536	0.744828	2.15516
sp|P43247|MSH2_MOUSE	P43247	MSH2_MOUSE	Msh2	DNA mismatch repair protein Msh2	37343	33093.2	30404.9	21579.3	19959.8	19003.2	61724	94069.6	0.854215	0.415971	1.99946
sp|Q925J9|MED1_MOUSE	Q925J9	MED1_MOUSE	Med1	Mediator of RNA polymerase II transcription subunit 1	13582.6	50149.1	42203	72449.4	12805	22718	31883.6	69936	0.843257	1.69044	1.51919
sp|Q62203|SF3A2_MOUSE	Q62203	SF3A2_MOUSE	Sf3a2	Splicing factor 3A subunit 2	24573	24084.5	13079.8	18341.4	13745.7	13431.9	74157.4	155480	0.840239	0.209317	3.07886
sp|Q9CY16|RT28_MOUSE	Q9CY16	RT28_MOUSE	Mrps28	28S ribosomal protein S28, mitochondrial	37356.3	39812.1	39084	75707.7	20711.2	22542.9	26357.8	34437.5	0.835175	1.40811	0.491123
sp|Q9D1I6|RM14_MOUSE	Q9D1I6	RM14_MOUSE	Mrpl14	39S ribosomal protein L14, mitochondrial	11365.1	19662.2	55527	139868	6979.96	10411.9	12882.4	22646.2	0.835126	3.48991	1.03057
tr|Q3TIX6|Q3TIX6_MOUSE	Q3TIX6	Q3TIX6_MOUSE	Fubp3	Protein Fubp3	12646.5	15250.2	15792.1	9545.8	7488.7	8218.8	101158	170357	0.82864	0.689843	4.11151
sp|Q9D6J6|NDUV2_MOUSE	Q9D6J6	NDUV2_MOUSE	Ndufv2	NADH dehydrogenase [ubiquinone] flavoprotein 2, mitochondrial	50652.2	43528.4	39029.8	36513.3	25641.1	27405.7	42135.1	53415.7	0.828164	0.510034	0.849002
sp|Q8R3G1|PP1R8_MOUSE	Q8R3G1	PP1R8_MOUSE	Ppp1r8	Nuclear inhibitor of protein phosphatase 1	50905	40219.1	37487.1	33996.2	23523.4	27813.1	49233.7	54846	0.827848	0.477622	1.01963
tr|F6TQW2|F6TQW2_MOUSE	F6TQW2	F6TQW2_MOUSE	Ighg2c	Protein Ighg2c	41151.5	45013.7	69626.9	21859.6	22590.3	25968.5	32257.2	38038.2	0.827373	0.913827	0.533698
sp|Q9JIY2|HAKAI_MOUSE	Q9JIY2	HAKAI_MOUSE	Cbll1	E3 ubiquitin-protein ligase Hakai	13583.3	11667	8853.02	9200.89	6960.68	7328.57	100910	182332	0.821373	0.337381	4.30904
sp|Q6GSS7|H2A2A_MOUSE	Q6GSS7	H2A2A_MOUSE	Hist2h2aa1	Histone H2A type 2-A	49620.7	51150.5	43722.3	25281.1	33339.4	23708.6	36633.1	50659	0.820834	0.274491	0.613675
sp|Q9R0P5|DEST_MOUSE	Q9R0P5	DEST_MOUSE	Dstn	Destrin	45608.4	40429.2	45018.7	25048.1	25555.5	23435.5	43006.3	55494.7	0.812449	0.516211	1.00762
sp|Q9D7B6|ACAD8_MOUSE	Q9D7B6	ACAD8_MOUSE	Acad8	Isobutyryl-CoA dehydrogenase, mitochondrial	48687.5	48638.4	42722	44069.4	23394.5	32445.5	41497	46534.7	0.801523	0.636253	0.656723
sp|P38647|GRP75_MOUSE	P38647	GRP75_MOUSE	Hspa9	Stress-70 protein, mitochondrial	60517.6	42996	37996.7	37082.8	28671.7	30871	35609.5	39376.7	0.797825	0.334496	0.332701
sp|Q9EQI8|RM46_MOUSE	Q9EQI8	RM46_MOUSE	Mrpl46	39S ribosomal protein L46, mitochondrial	28348.3	26348.8	56020.5	109323	15146.5	16401.1	20800.9	23222.1	0.793934	2.38987	0.480729
sp|P01863|GCAA_MOUSE	P01863	GCAA_MOUSE	Ighg	Ig gamma-2A chain C region, A allele	34913.4	46956.9	73320.3	23494.3	19447.4	27865.4	36234.3	39606.2	0.791111	1.033	0.680739
sp|Q8K009|AL1L2_MOUSE	Q8K009	AL1L2_MOUSE	Aldh1l2	Mitochondrial 10-formyltetrahydrofolate dehydrogenase	53880.8	43728.9	37304.4	38205.2	26388.1	30255.9	42774.2	43519	0.785102	0.414739	0.607325
sp|P04186|CFAB_MOUSE	P04186	CFAB_MOUSE	Cfb	Complement factor B	34521.6	53320.5	75038.3	23166.2	22451.9	28597.6	35263	40930.8	0.783015	0.943892	0.577776
sp|Q62193|RFA2_MOUSE	Q62193	RFA2_MOUSE	Rpa2	Replication protein A 32 kDa subunit	67538.4	44566	31691.5	22156.3	37024.7	28263.5	38142	36743.3	0.77995	-0.277933	0.197862
sp|Q9JK81|MYG1_MOUSE	Q9JK81	MYG1_MOUSE	Myg1	UPF0160 protein MYG1, mitochondrial	41824.4	38484.6	48487.2	28634.2	20098.3	26752.1	43840.9	75006.1	0.777503	0.719071	1.34297
sp|Q9DBR0|AKAP8_MOUSE	Q9DBR0	AKAP8_MOUSE	Akap8	A-kinase anchor protein 8	18857.6	22803.1	23006.7	18870.1	14522.5	9811.36	82384.2	140434	0.77572	0.783185	3.19483
sp|P70122|SBDS_MOUSE	P70122	SBDS_MOUSE	Sbds	Ribosome maturation protein SBDS	27397.7	29054.1	25966.3	24554.7	15865.6	17241.8	81517.5	94521.5	0.769863	0.609725	2.41067
tr|Q9DAE2|Q9DAE2_MOUSE	Q9DAE2	Q9DAE2_MOUSE	Rbmxl2	Protein Rbmxl2	12275.4	9602.92	12598.4	9012.81	6490.62	6341.02	129776	134197	0.769797	0.752078	4.36261
sp|Q7TPC1|CDSN_MOUSE	Q7TPC1	CDSN_MOUSE	Cdsn	Corneodesmosin	48306.8	65990.9	86250.9	18226.8	19729	47405.2	20184.4	25212.3	0.767676	0.638075	-0.564463
sp|Q9D6R2|IDH3A_MOUSE	Q9D6R2	IDH3A_MOUSE	Idh3a	Isocitrate dehydrogenase [NAD] subunit alpha, mitochondrial	53903.8	46467.3	26758.9	25521.7	37196.7	21799.6	47847.5	47553.3	0.766649	-0.174347	0.693378
sp|Q922U1|PRPF3_MOUSE	Q922U1	PRPF3_MOUSE	Prpf3	U4/U6 small nuclear ribonucleoprotein Prp3	14773.3	13928.9	15126.6	8768.52	10957.4	5942.95	109466	150687	0.764108	0.499662	3.94423
sp|Q02257|PLAK_MOUSE	Q02257	PLAK_MOUSE	Jup	Junction plakoglobin	56055.5	56778.2	97341.3	20100.3	22473.7	44363.4	21041	30656.3	0.755477	0.813223	-0.37056
sp|P84075|HPCA_MOUSE	P84075	HPCA_MOUSE	Hpca	Neuron-specific calcium-binding protein hippocalcin	36182.1	58836.8	33923.6	40378	28956.1	27735.4	31544.5	37799	0.745081	0.390259	0.290626
sp|Q14C51|PTCD3_MOUSE	Q14C51	PTCD3_MOUSE	Ptcd3	Pentatricopeptide repeat domain-containing protein 3, mitochondrial	37540.1	40060.9	45173.1	66001.3	22530.7	23892.4	29423.6	37016	0.741231	1.25991	0.517202
sp|Q9Z2H5|E41L1_MOUSE	Q9Z2H5	E41L1_MOUSE	Epb41l1	Band 4.1-like protein 1	40507.3	55713	50734.4	40718.4	31770.3	26055.3	24273.2	21790.5	0.734635	0.66132	-0.328077
sp|P63101|1433Z_MOUSE	P63101	1433Z_MOUSE	Ywhaz	14-3-3 protein zeta/delta	36823.4	38853.6	27247.1	28793.9	22826.9	22813.2	50426.9	89701	0.729551	0.296177	1.61837
sp|Q61765|K1H1_MOUSE	Q61765	K1H1_MOUSE	Krt31	Keratin, type I cuticular Ha1	4743.78	12230.9	613986	5160.24	4585.99	5667.6	7379.11	6627.64	0.727256	5.91608	0.449994
sp|Q91X72|HEMO_MOUSE	Q91X72	HEMO_MOUSE	Hpx	Hemopexin	34128.1	46913.2	70049.2	22220.6	19597.5	29584.1	30184.5	37168.9	0.720537	0.907739	0.453631
sp|Q9DB77|QCR2_MOUSE	Q9DB77	QCR2_MOUSE	Uqcrc2	Cytochrome b-c1 complex subunit 2, mitochondrial	43726.4	45075.1	35997.3	49988	23680.8	30236.3	37308.2	45978	0.71984	0.673347	0.627334
sp|Q9CPP6|NDUA5_MOUSE	Q9CPP6	NDUA5_MOUSE	Ndufa5	NADH dehydrogenase [ubiquinone] 1 alpha subcomplex subunit 5	42715.9	52041.1	37939.4	38401.3	28358.7	29192	35699.7	48896	0.719398	0.407618	0.555749
sp|Q8R3V5|SHLB2_MOUSE	Q8R3V5	SHLB2_MOUSE	Sh3glb2	Endophilin-B2	41273.4	42429.8	55893.1	40372	24831.1	26088.5	29014.9	36767.1	0.717062	0.918792	0.369471
sp|Q7TMF2|ERI1_MOUSE	Q7TMF2	ERI1_MOUSE	Eri1	3'-5' exoribonuclease 1	25407.4	27725.5	23982.3	18489.5	15817.3	16538.9	74601.4	116882	0.715566	0.392464	2.5651
sp|P28658|ATX10_MOUSE	P28658	ATX10_MOUSE	Atxn10	Ataxin-10	44837.3	36164.3	36462.9	27489.5	27801	21648.1	48321.5	67538.8	0.712007	0.371053	1.22837
sp|Q8BGT5|ALAT2_MOUSE	Q8BGT5	ALAT2_MOUSE	Gpt2	Alanine aminotransferase 2	50306.7	39500.7	42698.7	34241.3	24856.1	30097.6	42973.4	52905.8	0.708617	0.485516	0.803002
sp|P07759|SPA3K_MOUSE	P07759	SPA3K_MOUSE	Serpina3k	Serine protease inhibitor A3K	37152.1	46026.2	90763.9	21966.6	23291.3	27708.6	31315.1	39135.1	0.705712	1.14431	0.466111
sp|Q8K2B3|DHSA_MOUSE	Q8K2B3	DHSA_MOUSE	Sdha	Succinate dehydrogenase [ubiquinone] flavoprotein subunit, mitochondrial	49569.5	47873.4	32651	43447.4	26731.2	33152.7	35969.3	39769.3	0.702391	0.345702	0.338862
tr|E9PZP8|E9PZP8_MOUSE	E9PZP8	E9PZP8_MOUSE	Herc1	Protein Herc1	16548	17234.2	14909.2	13859.5	12306.9	8467.35	95480.6	153237	0.701466	0.469706	3.58164
sp|Q8C196|CPSM_MOUSE	Q8C196	CPSM_MOUSE	Cps1	Carbamoyl-phosphate synthase [ammonia], mitochondrial	48101	48371.6	44742.1	33207.9	28216	31151.8	26395	27300	0.700437	0.392866	-0.144893
sp|P48758|CBR1_MOUSE	P48758	CBR1_MOUSE	Cbr1	Carbonyl reductase [NADPH] 1	44066.4	48429.4	49721.6	34912.4	27026.3	30188	27111.9	30640.1	0.693012	0.564859	0.0134953
sp|Q99MR6|SRRT_MOUSE	Q99MR6	SRRT_MOUSE	Srrt	Serrate RNA effector molecule homolog	35145.1	30919.7	55952.2	21814.6	17996.5	22932.3	54510.8	79664.4	0.690764	0.926037	1.71293
tr|Q91VA7|Q91VA7_MOUSE	Q91VA7	Q91VA7_MOUSE	Idh3b	Isocitrate dehydrogenase 3 (NAD+) beta	50274.4	45418.4	34978.2	41590.1	28221	31244.9	35621.8	40809.5	0.686349	0.364686	0.362102
sp|Q61838|A2M_MOUSE	Q61838	A2M_MOUSE	A2m	Alpha-2-macroglobulin	37883.1	50045.4	70586.9	19469.6	22146.5	32520.4	28223.1	39413.4	0.685664	0.720163	0.307137
sp|P01837|IGKC_MOUSE	P01837	IGKC_MOUSE	>sp|P01837|IGKC_MOUSE	n/a	36404.5	45061.7	82683.4	22195.1	21136.5	29791.5	30199.2	35311.7	0.677741	1.04219	0.363273
sp|Q9Z0X1|AIFM1_MOUSE	Q9Z0X1	AIFM1_MOUSE	Aifm1	Apoptosis-inducing factor 1, mitochondrial	34810.5	48296	37998.8	62453	23130.8	28888.4	28934.5	33157	0.675919	0.949388	0.255355
sp|Q9DC61|MPPA_MOUSE	Q9DC61	MPPA_MOUSE	Pmpca	Mitochondrial-processing peptidase subunit alpha	47128.5	47031	40483.2	38147.6	28556	30630.7	43415.1	40129.7	0.669832	0.409822	0.497275
sp|Q9D2Q8|S10AE_MOUSE	Q9D2Q8	S10AE_MOUSE	S100a14	Protein S100-A14	47439.1	54089.3	105971	17087.1	25637.9	38248.3	14342.9	45695.9	0.668308	0.94576	-0.089609
sp|Q60649|CLPB_MOUSE	Q60649	CLPB_MOUSE	Clpb	Caseinolytic peptidase B protein homolog	39535.4	49425.1	39736.2	42960.6	26283.6	29771.1	35501.8	47659.5	0.666331	0.560996	0.569078
sp|Q9CPR5|RM15_MOUSE	Q9CPR5	RM15_MOUSE	Mrpl15	39S ribosomal protein L15, mitochondrial	16742.3	23469.9	50053.6	128715	11933.4	13455.7	16159.9	16090	0.663422	2.81581	0.34508
sp|Q61414|K1C15_MOUSE	Q61414	K1C15_MOUSE	Krt15	Keratin, type I cytoskeletal 15	50704.2	49431.7	132195	17293.1	20399.6	43013	21815.7	22990	0.659118	1.23719	-0.501089
sp|Q5U4C3|SFR19_MOUSE	Q5U4C3	SFR19_MOUSE	Scaf1	Splicing factor, arginine/serine-rich 19	12535.6	13736.8	12838.5	8781.16	8689.21	8009.29	103088	147432	0.65383	0.372625	3.90713
sp|Q91VC3|IF4A3_MOUSE	Q91VC3	IF4A3_MOUSE	Eif4a3	Eukaryotic initiation factor 4A-III	33694	24106.7	16008.8	13683.1	18230.9	18715.9	63053	98838.5	0.645638	-0.315375	2.13151
sp|Q9JHS4|CLPX_MOUSE	Q9JHS4	CLPX_MOUSE	Clpx	ATP-dependent Clp protease ATP-binding subunit clpX-like, mitochondrial	49865.2	46343.9	35978.5	42610.7	27016.1	34576.4	35102.8	41914.9	0.643419	0.351578	0.322437
sp|Q99LP6|GRPE1_MOUSE	Q99LP6	GRPE1_MOUSE	Grpel1	GrpE protein homolog 1, mitochondrial	52079.7	44984.6	40177.1	30025.5	27306.3	34838.1	45115.3	43719.6	0.643315	0.175898	0.515502
sp|Q91VA6|PDIP2_MOUSE	Q91VA6	PDIP2_MOUSE	Poldip2	Polymerase delta-interacting protein 2	52049.8	39790.1	40074.7	40805.4	29205.8	29628.9	36832.5	41912.7	0.642455	0.459119	0.420526
sp|Q80TR8|VPRBP_MOUSE	Q80TR8	VPRBP_MOUSE	Vprbp	Protein VPRBP	34952.2	39304.7	40846.1	28287.4	21324.5	26351.9	51150.4	63559	0.639246	0.536108	1.26663
sp|Q99J62|RFC4_MOUSE	Q99J62	RFC4_MOUSE	Rfc4	Replication factor C subunit 4	35787	32938.5	34597.5	40883.1	21041	23163	47895.6	75424.2	0.636669	0.771929	1.48015
sp|Q9Z2I0|LETM1_MOUSE	Q9Z2I0	LETM1_MOUSE	Letm1	LETM1 and EF-hand domain-containing protein 1, mitochondrial	47011.6	43326.9	33773.5	43752.8	27203.5	31003.9	37422.4	45017.9	0.634138	0.413483	0.502148
sp|Q9EPU0|RENT1_MOUSE	Q9EPU0	RENT1_MOUSE	Upf1	Regulator of nonsense transcripts 1	47114.6	41000.4	34974	32136.3	26988.6	29793.8	42234.3	49891.9	0.633943	0.241091	0.698167
sp|Q61464|ZN638_MOUSE	Q61464	ZN638_MOUSE	Znf638	Zinc finger protein 638	13955.1	10225.6	14414.5	10361.5	8935.21	6663.93	109413	161468	0.632393	0.667477	4.11812
sp|Q60597|ODO1_MOUSE	Q60597	ODO1_MOUSE	Ogdh	2-oxoglutarate dehydrogenase, mitochondrial	47039.1	41067.9	37386.1	41922	27067.5	29855.7	42348.7	45637.6	0.630239	0.478451	0.628262
sp|Q64092|TFE3_MOUSE	Q64092	TFE3_MOUSE	Tfe3	Transcription factor E3	38780.9	45315.5	34799	34456.6	34839.9	19540.5	52841.5	40959.6	0.628957	0.348845	0.786519
sp|Q9ERS5|PKHA2_MOUSE	Q9ERS5	PKHA2_MOUSE	Plekha2	Pleckstrin homology domain-containing family A member 2	45950.1	32059	31578.6	30402.3	27236.8	23219.5	59811.8	44160.4	0.628607	0.296788	1.04309
sp|Q922H2|PDK3_MOUSE	Q922H2	PDK3_MOUSE	Pdk3	[Pyruvate dehydrogenase (acetyl-transferring)] kinase isozyme 3, mitochondrial	39422	39233.7	37879.4	33481.6	24936.6	26010.1	48446.4	65331.6	0.626565	0.486149	1.15916
sp|Q8BH95|ECHM_MOUSE	Q8BH95	ECHM_MOUSE	Echs1	Enoyl-CoA hydratase, mitochondrial	46534	37698.5	45447.9	35833.8	26162.3	28448.1	46120.8	48431.5	0.625201	0.573753	0.791935
sp|Q8C9B9|DIDO1_MOUSE	Q8C9B9	DIDO1_MOUSE	Dido1	Death-inducer obliterator 1	23862.8	24317.1	14881	15893.4	20190.4	11065.3	83962.2	128961	0.624316	-0.0223885	2.76815
sp|P09671|SODM_MOUSE	P09671	SODM_MOUSE	Sod2	Superoxide dismutase [Mn], mitochondrial	49733.6	43596.1	40746.6	41276.3	31113.5	29620.6	33402.1	37479	0.619829	0.433521	0.222894
sp|Q9CQT2|RBM7_MOUSE	Q9CQT2	RBM7_MOUSE	Rbm7	RNA-binding protein 7	25604.1	23678.1	21680.5	18233.7	18316.3	13780.2	76101	116081	0.618653	0.314488	2.58199
sp|P61202|CSN2_MOUSE	P61202	CSN2_MOUSE	Cops2	COP9 signalosome complex subunit 2	50208.6	49453.4	34317.5	19991.9	30919	34002.9	36869.1	54380.8	0.618339	-0.257503	0.491118
sp|P97360|ETV6_MOUSE	P97360	ETV6_MOUSE	Etv6	Transcription factor ETV6	33711.9	37532.8	46264.2	27205	22294.8	24258.1	56083.6	61385.6	0.613912	0.658268	1.33534
sp|Q80UN9|MOD5_MOUSE	Q80UN9	MOD5_MOUSE	Trit1	tRNA dimethylallyltransferase, mitochondrial	50190	33907.4	41850.5	39410.3	30898.2	24113.2	43145.7	53120.8	0.612331	0.562831	0.807303
sp|P56959|FUS_MOUSE	P56959	FUS_MOUSE	Fus	RNA-binding protein FUS	19496.9	15233.8	13795.3	11678.2	12905.2	9844.02	122610	104529	0.610393	0.163181	3.31969
tr|Q6P6L6|Q6P6L6_MOUSE	Q6P6L6	Q6P6L6_MOUSE	Gemin4	Gem (Nuclear organelle) associated protein 4	8774.26	8232.65	5954.52	4894.78	5949.09	5197.41	110512	210802	0.60953	-0.0389876	4.84932
sp|Q924W5|SMC6_MOUSE	Q924W5	SMC6_MOUSE	Smc6	Structural maintenance of chromosomes protein 6	47828.1	48381.7	32737.6	24556.1	34275.9	28795.6	40479	43407.2	0.609197	-0.138612	0.411447
sp|P47911|RL6_MOUSE	P47911	RL6_MOUSE	Rpl6	60S ribosomal protein L6	42654.7	39338.7	28564.8	28588.9	26228.3	27601.2	46181.3	59499.4	0.607111	0.0864528	0.973244
sp|P70349|HINT1_MOUSE	P70349	HINT1_MOUSE	Hint1	Histidine triad nucleotide-binding protein 1	40280.4	33908.7	28141.9	30930.3	23111.1	25639.5	54088.4	70760.5	0.605787	0.277057	1.35669
sp|P06151|LDHA_MOUSE	P06151	LDHA_MOUSE	Ldha	L-lactate dehydrogenase A chain	39512.6	36200.4	30928.5	25059.5	27314.3	23002.7	54306.7	75323.6	0.589492	0.15407	1.36528
tr|E9Q616|E9Q616_MOUSE	E9Q616	E9Q616_MOUSE	Ahnak	Protein Ahnak	49863.4	39281.5	52399.7	36021.7	28146.1	31265.1	31104	34442.8	0.585418	0.573661	0.141793
sp|O35130|NEP1_MOUSE	O35130	NEP1_MOUSE	Emg1	Ribosomal RNA small subunit methyltransferase NEP1	32627.9	37010.9	78347.6	31040.2	24425.6	22053.8	37050.5	37041	0.583299	1.23479	0.672715
sp|Q9JJT9|PHAX_MOUSE	Q9JJT9	PHAX_MOUSE	Phax	Phosphorylated adapter RNA export protein	17350.3	15662.3	14420.9	12048.5	10115	11928.8	111592	139466	0.582644	0.263954	3.50958
sp|P97311|MCM6_MOUSE	P97311	MCM6_MOUSE	Mcm6	DNA replication licensing factor MCM6	26523	23279.7	33084.5	26358.8	20101.7	13229.1	65845.7	105492	0.579364	0.834656	2.36192
sp|Q9DCT2|NDUS3_MOUSE	Q9DCT2	NDUS3_MOUSE	Ndufs3	NADH dehydrogenase [ubiquinone] iron-sulfur protein 3, mitochondrial	36344.1	45018.5	38651.9	47032.1	25911.6	28681.4	41500.8	48988.7	0.57565	0.650311	0.729034
sp|O88569|ROA2_MOUSE	O88569	ROA2_MOUSE	Hnrnpa2b1	Heterogeneous nuclear ribonucleoproteins A2/B1	33086.6	26900.7	22554.4	22404	19229.2	21071.2	45628.3	65044.9	0.573859	0.157793	1.45744
sp|P19096|FAS_MOUSE	P19096	FAS_MOUSE	Fasn	Fatty acid synthase	42593.7	42448.4	36673.2	35075.5	26231.2	30973.1	41399.8	45889.8	0.572055	0.326829	0.609687
sp|E9Q557|DESP_MOUSE	E9Q557	DESP_MOUSE	Dsp	Desmoplakin	50093.3	54338.4	68476.8	27270.6	26073	44462.2	21223.1	36343.6	0.566145	0.440891	-0.293108
sp|E9Q5F9|SETD2_MOUSE	E9Q5F9	SETD2_MOUSE	Setd2	Histone-lysine N-methyltransferase SETD2	34926.3	22577.1	18059.3	18702.3	20536.7	18511.9	68227.5	79958.3	0.558377	-0.0870735	1.92406
sp|Q925I1|ATAD3_MOUSE	Q925I1	ATAD3_MOUSE	Atad3	ATPase family AAA domain-containing protein 3	49578.4	36996.2	40623.7	34049.7	31783.4	27109.3	42538.7	49664.4	0.555856	0.342505	0.646727
sp|Q3UL36|ARGL1_MOUSE	Q3UL36	ARGL1_MOUSE	Arglu1	Arginine and glutamate-rich protein 1	9030.74	11706.9	9286.14	7842.67	6366.03	7795.4	126769	156910	0.550288	0.274458	4.32422
sp|Q9Z1W9|STK39_MOUSE	Q9Z1W9	STK39_MOUSE	Stk39	STE20/SPS1-related proline-alanine-rich protein kinase	57452	33065.3	29507.7	44097.2	32143.7	29789.5	32423.3	26044.8	0.547481	0.24909	-0.0830628
sp|P23249|MOV10_MOUSE	P23249	MOV10_MOUSE	Mov10	Putative helicase MOV-10	39878.6	41648.1	37851.1	32915.3	28633.6	27172.2	40477.7	47042.8	0.546856	0.342648	0.649204
sp|Q5UAK0|MIER1_MOUSE	Q5UAK0	MIER1_MOUSE	Mier1	Mesoderm induction early response protein 1	34162.1	52541.6	57808.9	41713.9	29419.5	30019.7	30887	37864.8	0.544678	0.743612	0.209981
sp|Q9QZM0|UBQL2_MOUSE	Q9QZM0	UBQL2_MOUSE	Ubqln2	Ubiquilin-2	49192.1	55621	24043.9	19353.7	37707.3	34350	35781.9	43623.4	0.540604	-0.731531	0.140091
sp|Q3UQV5|KBTB8_MOUSE	Q3UQV5	KBTB8_MOUSE	Kbtbd8	Kelch repeat and BTB domain-containing protein 8	39469.2	44749.3	13716.3	16802.7	30806.6	27241.3	55117.7	78193.1	0.536894	-0.927534	1.19948
sp|P54276|MSH6_MOUSE	P54276	MSH6_MOUSE	Msh6	DNA mismatch repair protein Msh6	30897.1	29412.4	35191.1	24846.2	22010.2	19783.4	60645	90900.7	0.529102	0.522576	1.8584
sp|Q9DCV7|K2C7_MOUSE	Q9DCV7	K2C7_MOUSE	Krt7	Keratin, type II cytoskeletal 7	36586	62000	126943	19346.4	18795.1	49589	25706.8	20086.7	0.527722	1.09709	-0.578517
sp|P50136|ODBA_MOUSE	P50136	ODBA_MOUSE	Bckdha	2-oxoisovalerate dehydrogenase subunit alpha, mitochondrial	45313.7	43826.2	33713.8	36428	29078.9	32766.5	40112.5	42965.4	0.527405	0.181607	0.425799
sp|Q9ERI5|JMJD6_MOUSE	Q9ERI5	JMJD6_MOUSE	Jmjd6	Bifunctional arginine demethylase and lysyl-hydroxylase JMJD6	30056.9	17658.6	26670.3	17136.8	19138.7	14037.5	90058.7	99998.3	0.524313	0.401022	2.51821
sp|Q8BFY9|TNPO1_MOUSE	Q8BFY9	TNPO1_MOUSE	Tnpo1	Transportin-1	46533.2	38453.2	25162.7	22019.5	33582.1	25603.1	43961.4	57499.8	0.521995	-0.326993	0.777619
sp|Q8C5H8|NAKD2_MOUSE	Q8C5H8	NAKD2_MOUSE	Nadk2	NAD kinase 2, mitochondrial	45081.6	37966.6	46978.6	40345.2	30118.1	27775.2	36238.6	50250.1	0.520552	0.592976	0.579115
sp|Q8BTW8|CK5P1_MOUSE	Q8BTW8	CK5P1_MOUSE	Cdk5rap1	CDK5 regulatory subunit-associated protein 1	42164	43734.6	34614	38295.7	30480.8	29399.9	39911.4	39270.8	0.520544	0.28402	0.403086
sp|Q8BU88|RM22_MOUSE	Q8BU88	RM22_MOUSE	Mrpl22	39S ribosomal protein L22, mitochondrial	13298.3	17321	77786.7	137086	11657.8	9708.38	10562.1	10627.5	0.519109	3.33008	-0.0119748
sp|P62962|PROF1_MOUSE	P62962	PROF1_MOUSE	Pfn1	Profilin-1	30034.1	29401	26839.1	21811.8	21207.1	20271	65152	96121.1	0.518966	0.230117	1.95909
sp|Q61881|MCM7_MOUSE	Q61881	MCM7_MOUSE	Mcm7	DNA replication licensing factor MCM7	35572.8	29108.2	29748.1	28319.4	22319.9	22848.9	57548.5	86251.7	0.518016	0.362405	1.67067
sp|Q8CJG0|AGO2_MOUSE	Q8CJG0	AGO2_MOUSE	Ago2	Protein argonaute-2	40612.5	41788.6	38948.3	33048	29304.7	28340.2	41302.4	45079	0.515469	0.320728	0.583526
sp|Q8R3D1|TBC13_MOUSE	Q8R3D1	TBC13_MOUSE	Tbc1d13	TBC1 domain family member 13	47446.8	37900.6	40941.3	38739.2	27865.4	31929.3	36687	43368.2	0.513329	0.414209	0.420977
sp|Q9QXX4|CMC2_MOUSE	Q9QXX4	CMC2_MOUSE	Slc25a13	Calcium-binding mitochondrial carrier protein Aralar2	45513.4	47720.4	43855.2	38632.8	23984.6	41373.9	31364.6	34370.4	0.512476	0.335808	0.00828498
sp|Q9D0W5|PPIL1_MOUSE	Q9D0W5	PPIL1_MOUSE	Ppil1	Peptidyl-prolyl cis-trans isomerase-like 1	12994.3	35528.9	17409.2	27873.7	15451	18605.6	23176.9	206117	0.510737	0.411029	2.75119
sp|Q9D0L8|MCES_MOUSE	Q9D0L8	MCES_MOUSE	Rnmt	mRNA cap guanine-N7 methyltransferase	27098.2	22290.7	22425.1	17214.5	18788.2	15955.6	75850.7	92618.2	0.507431	0.190186	2.27766
sp|Q8BW10|NOB1_MOUSE	Q8BW10	NOB1_MOUSE	Nob1	RNA-binding protein NOB1	39968.6	41011.4	30680.7	32536.8	29338.4	27653.2	42349.1	59350.8	0.506817	0.149575	0.835499
tr|Q99N15|Q99N15_MOUSE	Q99N15	Q99N15_MOUSE	Hsd17b10	17beta-hydroxysteroid dehydrogenase type 10/short chain L-3-hydroxyacyl-CoA dehydrogenase	41990.8	46285	41393.7	40971.8	27334.6	34968.2	32781.6	47127.3	0.502721	0.402743	0.359059
sp|Q9Z2D0|MTMR9_MOUSE	Q9Z2D0	MTMR9_MOUSE	Mtmr9	Myotubularin-related protein 9	38520	35588.9	35692.5	41848.4	29675.8	22639.7	47145.1	48735.1	0.502406	0.567717	0.873993
sp|Q9CZU6|CISY_MOUSE	Q9CZU6	CISY_MOUSE	Cs	Citrate synthase, mitochondrial	45022.3	46498	38427.5	41494.8	29502.1	35131.4	32355.3	36722	0.501811	0.306318	0.0959317
sp|Q8K2D6|DCTD_MOUSE	Q8K2D6	DCTD_MOUSE	Dctd	Deoxycytidylate deaminase	37291.4	38110.5	36910.3	32490.1	26595.6	26656	44384	64756.7	0.501774	0.382116	1.03529
sp|P01631|KV2A7_MOUSE	P01631	KV2A7_MOUSE	>sp|P01631|KV2A7_MOUSE	n/a	36009.6	46384.7	80107.4	20565.3	23468	34763.4	29984.4	37781.5	0.500745	0.789804	0.218764
sp|P13020|GELS_MOUSE	P13020	GELS_MOUSE	Gsn	Gelsolin	46601.6	36547.7	46175.2	31595.3	28439.5	30344.4	36445.1	48414.1	0.500284	0.403804	0.529651
sp|Q8R0W0|EPIPL_MOUSE	Q8R0W0	EPIPL_MOUSE	Eppk1	Epiplakin	42165.4	41228.3	52141.1	26781.3	30562.5	28551	33627.2	44291.3	0.49645	0.416946	0.398476
sp|P47791|GSHR_MOUSE	P47791	GSHR_MOUSE	Gsr	Glutathione reductase, mitochondrial	35408.8	33273.8	37231.1	29062.1	24016	24872.6	54510.4	77001.5	0.490444	0.439362	1.42762
sp|Q9CZD3|SYG_MOUSE	Q9CZD3	SYG_MOUSE	Gars	Glycine--tRNA ligase	41042.1	39178.1	31942.2	37342.9	26367.2	30736	41867.6	56511.5	0.490392	0.278975	0.784779
sp|Q6ZQ93|UBP34_MOUSE	Q6ZQ93	UBP34_MOUSE	Usp34	Ubiquitin carboxyl-terminal hydrolase 34	46287.5	28369.9	40042.1	30603.1	28450.2	24727.1	42683.2	48028.7	0.489476	0.409782	0.770482
sp|Q91VY9|ZN622_MOUSE	Q91VY9	ZN622_MOUSE	Znf622	Zinc finger protein 622	38902.8	37891.6	30811.3	30263.1	26819	27910.7	48837.4	59087.7	0.488676	0.158243	0.979635
sp|P23475|XRCC6_MOUSE	P23475	XRCC6_MOUSE	Xrcc6	X-ray repair cross-complementing protein 6	37716.1	40775.8	42803.1	31177.2	27220.5	28821.7	41756.9	60566.6	0.486028	0.400627	0.868551
sp|Q99L04|DHRS1_MOUSE	Q99L04	DHRS1_MOUSE	Dhrs1	Dehydrogenase/reductase SDR family member 1	45154.7	44126.2	47317.4	41776.4	30526.5	33223	30726.4	32404.5	0.485936	0.48291	-0.0140687
sp|Q8VE92|RBM4B_MOUSE	Q8VE92	RBM4B_MOUSE	Rbm4b	RNA-binding protein 4B	51988.7	46251.2	27741.6	23149.2	39057.2	31234.7	26953.7	56460.1	0.48295	-0.465956	0.246927
sp|Q9DAT5|MTU1_MOUSE	Q9DAT5	MTU1_MOUSE	Trmu	Mitochondrial tRNA-specific 2-thiouridylase 1	41779.4	40950.5	36520.8	44126.8	28339.7	30872.4	38232.7	35138.8	0.482517	0.445741	0.309327
sp|Q6P8I4|PCNP_MOUSE	Q6P8I4	PCNP_MOUSE	Pcnp	PEST proteolytic signal-containing nuclear protein	27961.9	26023.3	23257.6	21066.1	17223	21428.9	70001.3	113980	0.48202	0.197536	2.25095
sp|O88974|SETB1_MOUSE	O88974	SETB1_MOUSE	Setdb1	Histone-lysine N-methyltransferase SETDB1	54747.1	47362.2	46006.4	27750.2	35949.3	37194.3	26366.6	36056.9	0.481309	0.0120392	-0.228642
sp|P97930|KTHY_MOUSE	P97930	KTHY_MOUSE	Dtymk	Thymidylate kinase	42230.5	41735.3	35984.9	39153.5	31760.4	28413.9	37994.1	43456.5	0.480655	0.320404	0.43678
sp|Q9EQU5|SET_MOUSE	Q9EQU5	SET_MOUSE	Set	Protein SET	37025.7	34149.9	31214.7	26980.5	24586.7	26433.3	50178.1	75619.7	0.48032	0.189836	1.30197
sp|Q61025|IFT20_MOUSE	Q61025	IFT20_MOUSE	Ift20	Intraflagellar transport protein 20 homolog	34361.1	41263.9	41423.1	35717.3	23765.6	30501.1	42570.6	52075.8	0.478795	0.507418	0.80248
sp|Q3U7R1|ESYT1_MOUSE	Q3U7R1	ESYT1_MOUSE	Esyt1	Extended synaptotagmin-1	47456.5	49227.4	37763.4	27565	34245.6	35168.7	26891	44916.1	0.478044	-0.0875203	0.0488936
sp|P49312|ROA1_MOUSE	P49312	ROA1_MOUSE	Hnrnpa1	Heterogeneous nuclear ribonucleoprotein A1	43743.7	34689.9	25621.6	24319.2	29241.3	27133.3	39338.5	48079.9	0.476426	-0.174825	0.632892
sp|P80316|TCPE_MOUSE	P80316	TCPE_MOUSE	Cct5	T-complex protein 1 subunit epsilon	46997.5	37320.2	36593.7	27804.4	29574.2	31148.1	43624.9	50509.1	0.473609	0.0847926	0.63249
sp|Q9Z204-2|HNRPC_MOUSE	Q9Z204-2	HNRPC_MOUSE	Hnrnpc	Isoform C1 of Heterogeneous nuclear ribonucleoproteins C1/C2	27737.3	20071.4	15778.9	16427.9	18153.1	16277.1	70192.8	92047.7	0.473596	-0.0963107	2.23639
sp|P62204|CALM_MOUSE	P62204	CALM_MOUSE	Calm1	Calmodulin	47973.6	39641.7	43313.9	38873.7	31054	32131.4	28782.3	25605	0.471592	0.37933	-0.216321
sp|Q9QYR6|MAP1A_MOUSE	Q9QYR6	MAP1A_MOUSE	Map1a	Microtubule-associated protein 1A	17696.1	64106.1	120446	24233.1	25393.3	33790.8	28582.6	36174.5	0.466931	1.28957	0.129829
sp|P17156|HSP72_MOUSE	P17156	HSP72_MOUSE	Hspa2	Heat shock-related 70 kDa protein 2	37786.1	42242.7	53606.6	29851.6	29986.6	27939.5	33749.4	36228.5	0.466306	0.52684	0.272685
sp|Q9CZR8|EFTS_MOUSE	Q9CZR8	EFTS_MOUSE	Tsfm	Elongation factor Ts, mitochondrial	41263.4	44767.6	33773.2	48225.9	26579.5	35718.1	34201.5	38471.4	0.46568	0.396432	0.222243
sp|Q3TUF7|YETS2_MOUSE	Q3TUF7	YETS2_MOUSE	Yeats2	YEATS domain-containing protein 2	35484.8	56720.9	61529.3	29059.6	34722.3	32103.9	32609.7	31671.6	0.464441	0.43892	-0.0560144
sp|Q5BKP2|UBP13_MOUSE	Q5BKP2	UBP13_MOUSE	Usp13	Ubiquitin carboxyl-terminal hydrolase 13	46693.5	33427.6	39199.3	40834	31172.7	26914.1	42880.1	41329.7	0.463973	0.462392	0.535779
sp|Q8R1T1|CHMP7_MOUSE	Q8R1T1	CHMP7_MOUSE	Chmp7	Charged multivesicular body protein 7	46204.1	40663.4	60183.5	33811.2	31231.3	31892	28690.2	41511.4	0.460642	0.574404	0.15333
sp|A2APB8|TPX2_MOUSE	A2APB8	TPX2_MOUSE	Tpx2	Targeting protein for Xklp2	43849.2	32903.4	37410.5	29141.9	30749.9	25200.3	51311.2	58815.4	0.456073	0.250347	0.976948
sp|Q6P9L6|KIF15_MOUSE	Q6P9L6	KIF15_MOUSE	Kif15	Kinesin-like protein KIF15	40475.3	41553.2	42145.3	31658.5	26925.1	32886.6	45329.8	53584.4	0.455698	0.303266	0.725748
sp|Q9WTP7|KAD3_MOUSE	Q9WTP7	KAD3_MOUSE	Ak3	GTP:AMP phosphotransferase AK3, mitochondrial	50635.6	35131.3	39108.2	45382.8	28605.2	34030	36103.3	37991	0.453445	0.431823	0.242387
sp|Q9CR26|VTA1_MOUSE	Q9CR26	VTA1_MOUSE	Vta1	Vacuolar protein sorting-associated protein VTA1 homolog	62845.3	35606.5	22821.1	31493.2	38156.6	33960.3	25067	42908.2	0.449082	-0.409005	-0.085328
sp|P17897|LYZ1_MOUSE	P17897	LYZ1_MOUSE	Lyz1	Lysozyme C-1	34550.5	47002.9	46372.1	13486.3	27986.1	31781.8	28371.6	59356.4	0.448377	0.00218406	0.553669
sp|Q8BP71|RFOX2_MOUSE	Q8BP71	RFOX2_MOUSE	Rbfox2	RNA binding protein fox-1 homolog 2	45448.1	26330.6	40988.5	27397.1	23331.2	29297.3	57305.4	63189.1	0.44771	0.377847	1.19505
sp|Q9D0K2|SCOT1_MOUSE	Q9D0K2	SCOT1_MOUSE	Oxct1	Succinyl-CoA:3-ketoacid coenzyme A transferase 1, mitochondrial	47030.5	41916	40436.6	36638	32384.2	32873.8	33564.4	36435.6	0.446781	0.2401	0.101199
sp|Q8VBV7|CSN8_MOUSE	Q8VBV7	CSN8_MOUSE	Cops8	COP9 signalosome complex subunit 8	43532.4	44966.1	47929.4	24981.2	40450.9	24559.9	42922.2	39099.4	0.444975	0.16545	0.335326
sp|Q9CPY7|AMPL_MOUSE	Q9CPY7	AMPL_MOUSE	Lap3	Cytosol aminopeptidase	41666.4	43564.9	34286.8	37913.3	29444.1	33244.5	39296.8	47007	0.443181	0.203798	0.461224
sp|P24270|CATA_MOUSE	P24270	CATA_MOUSE	Cat	Catalase	47717.5	45231.9	77213.2	27040.5	34030	34472.9	28002.5	19646.3	0.440281	0.605862	-0.523725
sp|P61957|SUMO2_MOUSE	P61957	SUMO2_MOUSE	Sumo2	Small ubiquitin-related modifier 2	53814.2	36828.7	42432.6	35704.5	36333.5	30647	34291.1	33142.9	0.436453	0.222267	0.00973607
sp|Q9CQ06|RM24_MOUSE	Q9CQ06	RM24_MOUSE	Mrpl24	39S ribosomal protein L24, mitochondrial	11750.7	19545.7	54588	143696	10991.8	12151.3	13809.5	15385.8	0.435417	3.09892	0.33515
sp|Q9D338|RM19_MOUSE	Q9D338	RM19_MOUSE	Mrpl19	39S ribosomal protein L19, mitochondrial	10202.8	20521.5	61043.6	130766	9831.93	12901.1	15373.7	25914.8	0.434589	3.07681	0.860951
sp|Q8VDG3|PARN_MOUSE	Q8VDG3	PARN_MOUSE	Parn	Poly(A)-specific ribonuclease PARN	28790.4	33205.5	22108.1	25427.3	21499.6	24525.3	60134.5	98654.2	0.42976	0.0465874	1.78662
sp|Q8CG47|SMC4_MOUSE	Q8CG47	SMC4_MOUSE	Smc4	Structural maintenance of chromosomes protein 4	44172.2	37088.3	40476.6	32438.9	31723.5	28635.2	42898.2	46660.7	0.428991	0.272662	0.569273
sp|P42227|STAT3_MOUSE	P42227	STAT3_MOUSE	Stat3	Signal transducer and activator of transcription 3	39875.5	32096.4	43228.1	38316.7	26803	26867.4	49732.3	52165.2	0.423308	0.603468	0.924921
sp|Q64674|SPEE_MOUSE	Q64674	SPEE_MOUSE	Srm	Spermidine synthase	44937	32947.9	32482.9	32624.2	29984.6	28381.1	47629.2	52901.1	0.416225	0.157697	0.784439
sp|Q9JJY4|DDX20_MOUSE	Q9JJY4	DDX20_MOUSE	Ddx20	Probable ATP-dependent RNA helicase DDX20	19263.8	20728.9	12983.9	9552.42	17327.9	12646	70819.4	192603	0.416026	-0.411457	3.1356
sp|Q60520|SIN3A_MOUSE	Q60520	SIN3A_MOUSE	Sin3a	Paired amphipathic helix protein Sin3a	38357.3	50322.4	34335.1	29633.2	33321.9	33206.3	33275.1	50305.8	0.414638	-0.0566081	0.329208
sp|Q9DBL7|COASY_MOUSE	Q9DBL7	COASY_MOUSE	Coasy	Bifunctional coenzyme A synthase	51145.9	40143.4	36321.2	36805.9	32036	36486.9	38186.7	22628	0.413862	0.0938224	-0.172164
sp|Q99N96|RM01_MOUSE	Q99N96	RM01_MOUSE	Mrpl1	39S ribosomal protein L1, mitochondrial	26716.3	20852.3	82377.1	99164.1	17951.4	17775.8	20281.5	22582.4	0.412982	2.3452	0.262736
sp|Q60610|TIAM1_MOUSE	Q60610	TIAM1_MOUSE	Tiam1	T-lymphoma invasion and metastasis-inducing protein 1	46957.1	36576.4	42049.2	35058.6	32314.1	30452.6	36086.6	41152.3	0.412357	0.296878	0.299328
sp|Q91W36|UBP3_MOUSE	Q91W36	UBP3_MOUSE	Usp3	Ubiquitin carboxyl-terminal hydrolase 3	43378.9	34144.9	51247.5	27220.9	29561.1	28756.1	42995.8	43762.1	0.410718	0.42819	0.573074
sp|Q99KR7|PPIF_MOUSE	Q99KR7	PPIF_MOUSE	Ppif	Peptidyl-prolyl cis-trans isomerase F, mitochondrial	50226.7	37657.8	40650.8	37980.2	32839	33274.3	36381.7	35664.5	0.410667	0.250159	0.123982
sp|Q61686|CBX5_MOUSE	Q61686	CBX5_MOUSE	Cbx5	Chromobox protein homolog 5	47361.1	46240.2	33083.4	37710.5	32090.6	38365.5	32254.8	33788.8	0.409805	0.00690116	-0.0933053
sp|Q4FZG7|TI8AB_MOUSE	Q4FZG7	TI8AB_MOUSE	Timm8a2	Putative mitochondrial import inner membrane translocase subunit Tim8 A-B	37912.9	45060	46767.1	36461.6	31211.2	31270.5	28121.4	42260.3	0.409204	0.413645	0.171763
sp|Q9EQM6|DGCR8_MOUSE	Q9EQM6	DGCR8_MOUSE	Dgcr8	Microprocessor complex subunit DGCR8	18031.5	21668.4	13925.7	17150.1	13857.3	16040.3	80579.3	146458	0.409105	0.0557606	2.92483
sp|Q8K2C6|SIR5_MOUSE	Q8K2C6	SIR5_MOUSE	Sirt5	NAD-dependent protein deacylase sirtuin-5, mitochondrial	34122.3	34174.8	43007.5	41595.8	25255.2	26310	41173	60408.7	0.405429	0.714318	0.978174
sp|Q9CQA3|DHSB_MOUSE	Q9CQA3	DHSB_MOUSE	Sdhb	Succinate dehydrogenase [ubiquinone] iron-sulfur subunit, mitochondrial	55375	35870.6	44882.6	34031.3	40491.6	28523.6	38741.3	19328	0.402842	0.193366	-0.249137
tr|F8VPQ2|F8VPQ2_MOUSE	F8VPQ2	F8VPQ2_MOUSE	Arid4a	Protein Arid4a	56859.1	38108.9	52993.6	27654	33119.4	38717.9	32840.2	27415.6	0.402708	0.166899	-0.253635
sp|Q6XUX1|DUSTY_MOUSE	Q6XUX1	DUSTY_MOUSE	Dstyk	Dual serine/threonine and tyrosine protein kinase	53393.2	42582.6	35299.4	36760.9	34129.7	38486.3	25356	31818.5	0.402383	-0.0110816	-0.344916
sp|Q61176|ARGI1_MOUSE	Q61176	ARGI1_MOUSE	Arg1	Arginase-1	31534.2	58402	106540	20201.2	21860.1	46254.6	18198.1	34804.9	0.400936	0.89585	-0.361893
sp|Q9R1P3|PSB2_MOUSE	Q9R1P3	PSB2_MOUSE	Psmb2	Proteasome subunit beta type-2	37379.1	42754.6	43132.3	29975	29102.8	31631.3	38603.2	50360	0.399904	0.267511	0.550703
sp|Q8BHR2|ENOX1_MOUSE	Q8BHR2	ENOX1_MOUSE	Enox1	Ecto-NOX disulfide-thiol exchanger 1	7201.74	8474.5	5997.29	5798.4	6563.35	5325.57	124490	182107	0.398963	-0.0113572	4.68866
sp|P58044|IDI1_MOUSE	P58044	IDI1_MOUSE	Idi1	Isopentenyl-diphosphate Delta-isomerase 1	33173.4	45622.1	37588.2	39338.6	29764.1	30049.4	38508.3	37196.4	0.397642	0.363015	0.339912
sp|Q9CQL1|MGN2_MOUSE	Q9CQL1	MGN2_MOUSE	Magohb	Protein mago nashi homolog 2	27150.6	28657	25427.8	23192.5	21909.7	20551.5	71595.1	96477	0.394319	0.195416	1.98486
sp|P16332|MUTA_MOUSE	P16332	MUTA_MOUSE	Mut	Methylmalonyl-CoA mutase, mitochondrial	40698.1	43292.9	35731.9	40309.9	30444.4	33610	39900	40656	0.390938	0.247494	0.330694
sp|P01027|CO3_MOUSE	P01027	CO3_MOUSE	C3	Complement C3	32528.1	41698.8	66493.7	25857.5	24454.1	32300.3	34405.8	43796.3	0.38721	0.702398	0.462476
sp|Q9Z179|SHCBP_MOUSE	Q9Z179	SHCBP_MOUSE	Shcbp1	SHC SH2 domain-binding protein 1	40511.8	35408.2	44731.5	32730.5	26307.6	31817	46521.2	47966.4	0.385332	0.414341	0.700976
sp|Q3UPL0|SC31A_MOUSE	Q3UPL0	SC31A_MOUSE	Sec31a	Protein transport protein Sec31A	41765.6	36584.2	31652.4	37440	28081.2	31928.2	39527	49742.3	0.38474	0.203339	0.572975
sp|P35492|HUTH_MOUSE	P35492	HUTH_MOUSE	Hal	Histidine ammonia-lyase	39871.6	48503.7	109738	19226	26872.9	40928.6	20555	39305.5	0.382325	0.927583	-0.179713
sp|Q91VD9|NDUS1_MOUSE	Q91VD9	NDUS1_MOUSE	Ndufs1	NADH-ubiquinone oxidoreductase 75 kDa subunit, mitochondrial	41839	41845.5	36753.2	37773.3	30968.7	33251.5	40198.2	44752.3	0.381934	0.214727	0.403597
sp|Q8K2F8|LS14A_MOUSE	Q8K2F8	LS14A_MOUSE	Lsm14a	Protein LSM14 homolog A	54632.4	43488	25166.3	16253.7	39056.2	36256.3	37203.8	42041.4	0.381665	-0.862562	0.073435
sp|Q9CZ13|QCR1_MOUSE	Q9CZ13	QCR1_MOUSE	Uqcrc1	Cytochrome b-c1 complex subunit 1, mitochondrial	46378	42518.5	41629.6	42593.3	30448.8	37860.2	34163.5	27523.4	0.38005	0.302136	-0.147113
sp|P17809|GTR1_MOUSE	P17809	GTR1_MOUSE	Slc2a1	Solute carrier family 2, facilitated glucose transporter member 1	40751.6	51692.1	27133.1	17794.2	39363.4	31685	31755.1	57828.9	0.379772	-0.661211	0.33444
sp|Q9CYA6|ZCHC8_MOUSE	Q9CYA6	ZCHC8_MOUSE	Zcchc8	Zinc finger CCHC domain-containing protein 8	24990.6	18886.5	15689.1	17519.3	17432.9	16310.1	80364.6	110856	0.378882	-0.0230382	2.50258
sp|Q7TSV4|PGM2_MOUSE	Q7TSV4	PGM2_MOUSE	Pgm2	Phosphoglucomutase-2	38287.1	31522	31078.7	25836.8	27639.2	26087.4	53214	74522.9	0.377778	0.0831854	1.24947
sp|Q6IE21|OTU6A_MOUSE	Q6IE21	OTU6A_MOUSE	Otud6a	OTU domain-containing protein 6A	47774.9	39207.2	65332.3	29049.6	34898.2	32122.9	28863.7	35471.3	0.376105	0.493897	-0.0590088
sp|P08207|S10AA_MOUSE	P08207	S10AA_MOUSE	S100a10	Protein S100-A10	42426.4	42276.7	51831.1	30634.7	35332.4	30154.8	35016.6	23672	0.371202	0.332583	-0.158134
tr|Q9CZN7|Q9CZN7_MOUSE	Q9CZN7	Q9CZN7_MOUSE	Shmt2	Serine hydroxymethyltransferase	45153	36707.2	39503.7	40692.6	33417.2	29887.7	38513.8	39632.9	0.370844	0.341218	0.303869
sp|Q99N89|RM43_MOUSE	Q99N89	RM43_MOUSE	Mrpl43	39S ribosomal protein L43, mitochondrial	27351.6	30157.7	42857.5	86447.2	23283.9	21214	24353.8	33759.4	0.37006	1.53897	0.38513
sp|Q99M74|KRT82_MOUSE	Q99M74	KRT82_MOUSE	Krt82	Keratin, type II cuticular Hb2	3887.65	18746.5	558342	8100.69	3033.23	14497.5	9783.86	12961.7	0.368615	5.01397	0.375695
sp|Q8VCN5|CGL_MOUSE	Q8VCN5	CGL_MOUSE	Cth	Cystathionine gamma-lyase	34128.3	36714.2	33605.2	30978.3	28021.6	26863.2	45784.8	67540.5	0.368211	0.234761	1.04599
sp|Q9Z1J3|NFS1_MOUSE	Q9Z1J3	NFS1_MOUSE	Nfs1	Cysteine desulfurase, mitochondrial	47145.6	38581.1	40557.5	39268.8	37266.2	29179.4	40182.2	33828.7	0.367571	0.26469	0.155564
sp|Q9DBP5|KCY_MOUSE	Q9DBP5	KCY_MOUSE	Cmpk1	UMP-CMP kinase	37120.5	36342	31281.5	32172.4	29800.6	27163.2	48738.5	60150.7	0.366962	0.155663	0.934743
sp|P06801|MAOX_MOUSE	P06801	MAOX_MOUSE	Me1	NADP-dependent malic enzyme	46341.2	42860.3	48160.7	33508.7	32233.1	36949.7	24328.5	36212.9	0.366653	0.239381	-0.192492
sp|Q9CR16|PPID_MOUSE	Q9CR16	PPID_MOUSE	Ppid	Peptidyl-prolyl cis-trans isomerase D	43123.8	36458	33112.8	29566.7	31282.1	30487.2	45133.3	52850.1	0.36555	0.0211045	0.665647
sp|Q91WN1|DNJC9_MOUSE	Q91WN1	DNJC9_MOUSE	Dnajc9	DnaJ homolog subfamily C member 9	35162.1	36218.3	28026	31274.3	22761.3	32687	47983.3	69149.4	0.364384	0.0968952	1.07893
sp|Q9Z277|BAZ1B_MOUSE	Q9Z277	BAZ1B_MOUSE	Baz1b	Tyrosine-protein kinase BAZ1B	38193.5	41934.4	69804.3	27477.6	31561	30686.8	30822.8	35023.5	0.364281	0.644148	0.081079
sp|P08030|APT_MOUSE	P08030	APT_MOUSE	Aprt	Adenine phosphoribosyltransferase	50459.2	34155.5	47812.9	37157.9	31246.3	34554.6	31310.4	35993.5	0.362801	0.368861	0.0325844
sp|Q9WUR9|KAD4_MOUSE	Q9WUR9	KAD4_MOUSE	Ak4	Adenylate kinase 4, mitochondrial	42870.4	37273.1	40148.2	36288.9	31328.2	30999.2	43329.6	37084.5	0.362718	0.294407	0.367582
sp|Q8CDN6|TXNL1_MOUSE	Q8CDN6	TXNL1_MOUSE	Txnl1	Thioredoxin-like protein 1	48395.4	38606.5	31087.7	38520.5	29651.1	38082.9	31335	39010.1	0.361166	0.0393765	0.0545692
sp|Q62318|TIF1B_MOUSE	Q62318	TIF1B_MOUSE	Trim28	Transcription intermediary factor 1-beta	36137.5	35149.6	31966.3	30646.6	27542.6	28017.6	48675.9	69258.5	0.359588	0.172407	1.08586
sp|Q68FL6|SYMC_MOUSE	Q68FL6	SYMC_MOUSE	Mars	Methionine--tRNA ligase, cytoplasmic	39331.2	42466.8	34006.6	37171.1	30727.3	33175.4	40127.5	50329.2	0.356188	0.155547	0.501351
sp|Q80W00|PP1RA_MOUSE	Q80W00	PP1RA_MOUSE	Ppp1r10	Serine/threonine-protein phosphatase 1 regulatory subunit 10	28987.7	24642.6	24174.6	25523.1	21070.9	20859.5	69251.3	97486.4	0.355052	0.245182	1.99151
sp|Q8VE22|RT23_MOUSE	Q8VE22	RT23_MOUSE	Mrps23	28S ribosomal protein S23, mitochondrial	35917.8	42431.4	33952.1	50431.8	30734.7	30705.7	28878.3	36546.7	0.350729	0.45778	0.0906534
sp|Q9CZC8|SCRN1_MOUSE	Q9CZC8	SCRN1_MOUSE	Scrn1	Secernin-1	41672.3	42111.9	53157.1	34868.8	28908	36866.4	30108.8	42154.9	0.349153	0.420404	0.135746
sp|P62754|RS6_MOUSE	P62754	RS6_MOUSE	Rps6	40S ribosomal protein S6	37092.1	42449.5	33297	32374.6	32235.9	30305.5	34854	54447.1	0.346897	0.0704589	0.513865
sp|P62267|RS23_MOUSE	P62267	RS23_MOUSE	Rps23	40S ribosomal protein S23	45575.6	34977.6	41604.6	37180.3	33832.1	29702.5	40343.3	28370.4	0.342402	0.310377	0.113056
sp|O55128|SAP18_MOUSE	O55128	SAP18_MOUSE	Sap18	Histone deacetylase complex subunit SAP18	22455.5	22558.1	36419.2	18961.1	16725.7	18815.9	74065	110295	0.340851	0.639867	2.37495
sp|Q9JLZ3|AUHM_MOUSE	Q9JLZ3	AUHM_MOUSE	Auh	Methylglutaconyl-CoA hydratase, mitochondrial	40499.9	41454.2	52901.9	35605.8	31297.8	33484.6	33629.8	44750.4	0.339213	0.450199	0.274887
tr|E9QAB6|E9QAB6_MOUSE	E9QAB6	E9QAB6_MOUSE	Ptar1	Protein Ptar1	39144.2	45301.5	31921.6	35317.7	35916.8	30840.3	34756.9	49218.8	0.3391	0.0103824	0.331049
sp|Q60598|SRC8_MOUSE	Q60598	SRC8_MOUSE	Cttn	Src substrate cortactin	48571.3	33032.7	37078.6	31221.7	36064.5	28501.4	47910.5	38839.5	0.337869	0.0811207	0.426091
sp|P47754|CAZA2_MOUSE	P47754	CAZA2_MOUSE	Capza2	F-actin-capping protein subunit alpha-2	39964.7	37123	39578.1	35640.5	30876.3	30175.8	41308.6	46589.4	0.336459	0.30105	0.525789
sp|Q9CPN8|IF2B3_MOUSE	Q9CPN8	IF2B3_MOUSE	Igf2bp3	Insulin-like growth factor 2 mRNA-binding protein 3	46923	39482.5	38845.9	28068.2	35625.1	32852.7	37693.6	37813.7	0.335484	-0.0333266	0.140977
sp|Q91YT0|NDUV1_MOUSE	Q91YT0	NDUV1_MOUSE	Ndufv1	NADH dehydrogenase [ubiquinone] flavoprotein 1, mitochondrial	38886.8	42340.9	40996.4	44569.8	29449.4	34969.6	35697	37457.1	0.334487	0.409555	0.183454
sp|Q9WU56|TRUA_MOUSE	Q9WU56	TRUA_MOUSE	Pus1	tRNA pseudouridine synthase A, mitochondrial	34847.4	39043	31236.3	36554	25455.3	33170.1	46835.2	58959	0.33386	0.209551	0.851661
tr|Q8CCB2|Q8CCB2_MOUSE	Q8CCB2	Q8CCB2_MOUSE	Zfp207	BUB3-interacting and GLEBS motif-containing protein ZNF207	28484.6	20189.4	22160.2	24001.5	21146.8	17502.6	65256.4	125308	0.332706	0.256251	2.30176
sp|P28659|CELF1_MOUSE	P28659	CELF1_MOUSE	Celf1	CUGBP Elav-like family member 1	28111.7	21407.4	17595.6	19557.3	26386.9	12994.3	83358.9	89667.3	0.330479	-0.0840289	2.13541
sp|P09041|PGK2_MOUSE	P09041	PGK2_MOUSE	Pgk2	Phosphoglycerate kinase 2	32340.7	52382.6	37683.9	44327.4	28581.2	38820.8	22675.3	31984.2	0.329968	0.283032	-0.302319
sp|P11679|K2C8_MOUSE	P11679	K2C8_MOUSE	Krt8	Keratin, type II cytoskeletal 8	33407.8	56781.6	103659	21227.8	24333.6	47437.3	18945.3	27107.2	0.329561	0.79915	-0.64012
sp|Q6EDY6|LR16A_MOUSE	Q6EDY6	LR16A_MOUSE	Lrrc16a	Leucine-rich repeat-containing protein 16A	43636.5	33587.8	50589.1	50931.7	31820.5	29685.2	30953.3	28040.8	0.328334	0.722982	-0.0601511
sp|Q6R0H7|GNAS1_MOUSE	Q6R0H7	GNAS1_MOUSE	Gnas	Guanine nucleotide-binding protein G(s) subunit alpha isoforms XLas	43867.8	45207.5	52673.9	28317.4	35345.5	35615.2	36253	35866	0.328007	0.190747	0.0233595
sp|Q9Z110|P5CS_MOUSE	Q9Z110	P5CS_MOUSE	Aldh18a1	Delta-1-pyrroline-5-carboxylate synthase	42026.5	39461.8	44109.8	38743.4	31440.8	33502.6	40115.8	36676.4	0.327411	0.351375	0.241779
sp|P23927|CRYAB_MOUSE	P23927	CRYAB_MOUSE	Cryab	Alpha-crystallin B chain	51355.4	39552.1	48198.8	32099.6	32617.8	39837.7	30473.7	39476.7	0.327305	0.148276	-0.0507644
sp|P17095|HMGA1_MOUSE	P17095	HMGA1_MOUSE	Hmga1	High mobility group protein HMG-I/HMG-Y	38442.1	28282.4	28492.4	29187.8	26505.9	26698.5	58226.8	65595.4	0.326671	0.116531	1.21865
sp|Q9Z2N8|ACL6A_MOUSE	Q9Z2N8	ACL6A_MOUSE	Actl6a	Actin-like protein 6A	17478.9	27468.3	29062.8	26898.2	16743.5	19106.9	73578.3	105960	0.326244	0.642433	2.32423
sp|P60521|GBRL2_MOUSE	P60521	GBRL2_MOUSE	Gabarapl2	Gamma-aminobutyric acid receptor-associated protein-like 2	50535.1	38517.4	41520.3	32779.2	40745	30338.5	30202.4	33561.2	0.325142	0.0638364	-0.156782
sp|Q9D883|U2AF1_MOUSE	Q9D883	U2AF1_MOUSE	U2af1	Splicing factor U2AF 35 kDa subunit	13057.9	14273.3	17126.4	8298.94	11274.2	10546.5	107979	151347	0.32485	0.220567	3.571
sp|P54726|RD23A_MOUSE	P54726	RD23A_MOUSE	Rad23a	UV excision repair protein RAD23 homolog A	53160.7	37476	20420.4	33057.5	41878.3	30536.6	37203.7	38800.1	0.323808	-0.437346	0.0697844
sp|Q497I4|KRT35_MOUSE	Q497I4	KRT35_MOUSE	Krt35	Keratin, type I cuticular Ha5	11706.7	15378.4	516792	10545.6	12119.6	9534.6	11734.5	13597.9	0.322854	4.60601	0.22634
sp|O35083|PLCA_MOUSE	O35083	PLCA_MOUSE	Agpat1	1-acyl-sn-glycerol-3-phosphate acyltransferase alpha	37760.9	45970.1	61728.8	32020.2	32928.2	34122.4	26981.9	43710.7	0.320513	0.483554	0.0763093
sp|Q6ZQH8|NU188_MOUSE	Q6ZQH8	NU188_MOUSE	Nup188	Nucleoporin NUP188 homolog	27859.3	59214.3	39649.8	41623.7	27485.6	42242.5	21184.5	60993.7	0.320496	0.221044	0.237017
sp|P18242|CATD_MOUSE	P18242	CATD_MOUSE	Ctsd	Cathepsin D	37654.7	51308.1	32973	28867.1	38103.7	33146.5	37320.4	35519.8	0.320309	-0.20435	0.031841
sp|P61406|EST1A_MOUSE	P61406	EST1A_MOUSE	Smg6	Telomerase-binding protein EST1A	41339	37982.9	45629.6	38394.2	29752.2	33820.1	36626	45885.8	0.319323	0.402402	0.376204
sp|Q8K2Z4|CND1_MOUSE	Q8K2Z4	CND1_MOUSE	Ncapd2	Condensin complex subunit 1	41678.4	40444.9	34639.1	37059.6	29302.9	36526.5	38710.3	44564.9	0.31906	0.123215	0.339156
sp|Q99NH2|PARD3_MOUSE	Q99NH2	PARD3_MOUSE	Pard3	Partitioning defective 3 homolog	38163.1	50392.9	27494.9	33965.3	38780.4	32508.2	29248.2	40199.2	0.312919	-0.21402	-0.0377503
tr|S4R1W5|S4R1W5_MOUSE	S4R1W5	S4R1W5_MOUSE	Rbm6	Protein Rbm6	18500.9	22965.6	17053.1	22913.2	15948.8	17443.7	88411.5	111752	0.312423	0.259263	2.58359
sp|Q6ZPY2|SMG5_MOUSE	Q6ZPY2	SMG5_MOUSE	Smg5	Protein SMG5	41351.3	41227.4	37814.2	42925.7	28045.9	38472.3	32475.3	39551.8	0.312018	0.279533	0.114789
sp|Q8VEJ9|VPS4A_MOUSE	Q8VEJ9	VPS4A_MOUSE	Vps4a	Vacuolar protein sorting-associated protein 4A	49459.3	37019.3	35110.9	34468.3	36204.5	33464.8	34731.1	35901.8	0.311822	-0.00186709	0.0198175
sp|Q8C3X4|GUF1_MOUSE	Q8C3X4	GUF1_MOUSE	Guf1	Translation factor Guf1, mitochondrial	42388.5	40890.5	36929.4	43903.2	33090.9	34004.4	35305	32327.3	0.311741	0.268725	0.0114995
sp|Q921W0|CHM1A_MOUSE	Q921W0	CHM1A_MOUSE	Chmp1a	Charged multivesicular body protein 1a	39416.8	39660.1	23574.9	40956.7	27752.6	35964.9	33904.1	40325.4	0.311568	0.0183166	0.220303
tr|Q8R2K3|Q8R2K3_MOUSE	Q8R2K3	Q8R2K3_MOUSE	Ssbp1	Single-stranded DNA-binding protein	43608.4	44333.9	33800.7	40386.9	35054	35869.3	33793.5	21665.2	0.310298	0.0649188	-0.354847
sp|P31310|HXA10_MOUSE	P31310	HXA10_MOUSE	Hoxa10	Homeobox protein Hox-A10	43146.3	44891.2	56882.3	31459.8	33781.5	37223.2	29568.2	35641.3	0.310204	0.315187	-0.122832
sp|Q8BGH2|SAM50_MOUSE	Q8BGH2	SAM50_MOUSE	Samm50	Sorting and assembly machinery component 50 homolog	40246.8	42689	31304.5	32400.5	40189.3	26763.2	38632.3	40783.6	0.308859	-0.0717286	0.24629
sp|Q9CXT8|MPPB_MOUSE	Q9CXT8	MPPB_MOUSE	Pmpcb	Mitochondrial-processing peptidase subunit beta	47457.2	33106.9	41465.7	36300.1	37357.8	27729.3	43324.4	35837.3	0.307765	0.256764	0.282431
sp|Q9WUV0|ORC5_MOUSE	Q9WUV0	ORC5_MOUSE	Orc5	Origin recognition complex subunit 5	54568	32568	58937.8	35421.8	38668.8	31733.3	33810.5	33615.5	0.307651	0.422551	-0.0623131
sp|O88708|ORC4_MOUSE	O88708	ORC4_MOUSE	Orc4	Origin recognition complex subunit 4	40423.9	37228.5	30999.8	35607.3	29018.5	33723.8	41340.5	54976.2	0.307591	0.0862357	0.618347
sp|Q8R1B4|EIF3C_MOUSE	Q8R1B4	EIF3C_MOUSE	Eif3c	Eukaryotic translation initiation factor 3 subunit C	47934.9	42422	38068.8	27904	40591	32485	29670.7	36597.7	0.306235	-0.147528	-0.141078
sp|Q9QXS1|PLEC_MOUSE	Q9QXS1	PLEC_MOUSE	Plec	Plectin	45127	40818.5	41564.9	35677.7	33661.8	35867.8	31693.6	28384.2	0.305796	0.15177	-0.210794
sp|O35280|CHK1_MOUSE	O35280	CHK1_MOUSE	Chek1	Serine/threonine-protein kinase Chk1	30340.8	34314.5	33828.6	19964.2	26598.7	25719.8	61901.7	79360.9	0.305447	0.0400919	1.43299
sp|Q9CX53|GEMI6_MOUSE	Q9CX53	GEMI6_MOUSE	Gemin6	Gem-associated protein 6	10818.3	12611.4	9342.08	16508	9456.94	9507.65	97741.3	177681	0.30503	0.446862	3.86027
sp|Q69Z98|BRSK2_MOUSE	Q69Z98	BRSK2_MOUSE	Brsk2	Serine/threonine-protein kinase BRSK2	28613.6	36618.9	34047.5	29085.2	23156.7	29645.3	57924	74311.5	0.304998	0.257797	1.32445
tr|E9PWG6|E9PWG6_MOUSE	E9PWG6	E9PWG6_MOUSE	Ncapg	Protein Ncapg	37031.5	39004.8	50673.2	38166.4	29873.5	31698.3	36080	43342	0.304419	0.528935	0.36727
sp|Q64311|NTAN1_MOUSE	Q64311	NTAN1_MOUSE	Ntan1	Protein N-terminal asparagine amidohydrolase	39324.2	30668.3	29726	42073.3	31209.2	25469	44764.8	44670.4	0.304405	0.341174	0.658049
sp|O35435|PYRD_MOUSE	O35435	PYRD_MOUSE	Dhodh	Dihydroorotate dehydrogenase (quinone), mitochondrial	29388.4	48237.7	34923.1	55656.2	26523.7	36359.2	31515.9	31189	0.303875	0.526514	-0.00408943
sp|Q9CR29|CCD43_MOUSE	Q9CR29	CCD43_MOUSE	Ccdc43	Coiled-coil domain-containing protein 43	54574.9	34118.7	31263.5	34895.7	33493.8	38388.1	38909.3	37955	0.303202	-0.119686	0.0966837
sp|P33609|DPOLA_MOUSE	P33609	DPOLA_MOUSE	Pola1	DNA polymerase alpha catalytic subunit	40016.7	34922	43736.3	33233.4	31761.2	28995	40319.1	52725.6	0.302679	0.341259	0.614892
sp|O55102|BL1S1_MOUSE	O55102	BL1S1_MOUSE	Bloc1s1	Biogenesis of lysosome-related organelles complex 1 subunit 1	36514.4	54257.9	72672	30019	29541.4	44076.7	26160.2	30790	0.302191	0.480178	-0.37036
sp|P46718|PDCD2_MOUSE	P46718	PDCD2_MOUSE	Pdcd2	Programmed cell death protein 2	37970.4	36642.2	39311.7	32964.4	28528.5	31985.9	45373.7	58721.8	0.30214	0.25624	0.782558
sp|P97310|MCM2_MOUSE	P97310	MCM2_MOUSE	Mcm2	DNA replication licensing factor MCM2	32592.2	40099.4	44008.3	31731.6	29508.9	29457.4	41359.6	50970.8	0.301899	0.361163	0.646916
sp|Q9D0M0|EXOS7_MOUSE	Q9D0M0	EXOS7_MOUSE	Exosc7	Exosome complex exonuclease RRP42	50371.8	46508.4	19804.9	23730.7	49956.9	28631.3	21558.7	56342.9	0.30189	-0.852116	-0.012659
sp|P58774|TPM2_MOUSE	P58774	TPM2_MOUSE	Tpm2	Tropomyosin beta chain	45678.8	36959	48344.5	38696.1	32754.5	34282.8	33477	29953.3	0.301838	0.376725	-0.0797916
sp|Q80XP8|FA76B_MOUSE	Q80XP8	FA76B_MOUSE	Fam76b	Protein FAM76B	24176.4	37922.8	37062.7	36597.5	23072.4	27352.8	54307.5	76681.6	0.300429	0.546742	1.37723
sp|Q9CPT3|NANP_MOUSE	Q9CPT3	NANP_MOUSE	Nanp	N-acylneuraminate-9-phosphatase	34906.9	27187.3	33483	34615.4	24132.6	26299.6	47245.4	81375.4	0.300113	0.433274	1.35071
sp|P70398|USP9X_MOUSE	P70398	USP9X_MOUSE	Usp9x	Probable ubiquitin carboxyl-terminal hydrolase FAF-X	38831.5	41519	34334.3	41788.7	29822.5	35463.7	38713.3	38284.5	0.299526	0.221551	0.238037
sp|Q9D8W5|PSD12_MOUSE	Q9D8W5	PSD12_MOUSE	Psmd12	26S proteasome non-ATPase regulatory subunit 12	39409.9	38409.4	27476.1	31564.1	34519.5	28774.3	35476.7	58058	0.298064	-0.100363	0.563439
sp|P63038|CH60_MOUSE	P63038	CH60_MOUSE	Hspd1	60 kDa heat shock protein, mitochondrial	41549.8	40099.6	39359.9	41118.3	32569.4	33899	37182.7	38233	0.296775	0.27593	0.182197
sp|Q61216|MRE11_MOUSE	Q61216	MRE11_MOUSE	Mre11a	Double-strand break repair protein MRE11A	33299	46329.3	39005.8	33758	31151.4	33699.9	31520.6	39629.9	0.296147	0.166086	0.133737
tr|Q91X76|Q91X76_MOUSE	Q91X76	Q91X76_MOUSE	Nt5dc2	5'-nucleotidase domain containing 2	33738	38547.7	36358.5	43355	27518.9	31379.6	39106.4	49911.6	0.295481	0.436594	0.595867
sp|P17563|SBP1_MOUSE	P17563	SBP1_MOUSE	Selenbp1	Selenium-binding protein 1	47499.7	36166.2	49629.9	39776.6	33275	34929.6	29321.5	27034.4	0.294769	0.39051	-0.275301
sp|Q3TDD9|PPR21_MOUSE	Q3TDD9	PPR21_MOUSE	Ppp1r21	Protein phosphatase 1 regulatory subunit 21	42447.4	35354.2	35639.5	39140.2	29418.1	34043.5	37221.7	34626.4	0.293916	0.236762	0.179066
sp|Q9R1P0|PSA4_MOUSE	Q9R1P0	PSA4_MOUSE	Psma4	Proteasome subunit alpha type-4	39824.7	45876.3	44167.9	30930.4	30437.9	39519.5	32787.4	36031.5	0.292834	0.102302	-0.0236731
sp|P62996|TRA2B_MOUSE	P62996	TRA2B_MOUSE	Tra2b	Transformer-2 protein homolog beta	20503.9	24820.1	22091.6	18630.5	20380	16637.4	76679.8	121744	0.292075	0.137612	2.42231
sp|P55194|3BP1_MOUSE	P55194	3BP1_MOUSE	Sh3bp1	SH3 domain-binding protein 1	39944.6	28523.1	38696.5	32703.2	31965.3	23978.3	42087.9	56235.6	0.291452	0.351946	0.813565
sp|Q91Z53|GRHPR_MOUSE	Q91Z53	GRHPR_MOUSE	Grhpr	Glyoxylate reductase/hydroxypyruvate reductase	37578.8	38909.1	51808	29875.2	31142.7	31391.7	35066.4	50270.3	0.290581	0.385389	0.448516
sp|Q8BMS1|ECHA_MOUSE	Q8BMS1	ECHA_MOUSE	Hadha	Trifunctional enzyme subunit alpha, mitochondrial	42147.1	43616.6	37972.7	37807.3	33092.2	37042.5	35402.5	31807.2	0.290238	0.111687	-0.0614593
sp|Q60848|HELLS_MOUSE	Q60848	HELLS_MOUSE	Hells	Lymphocyte-specific helicase	36329.2	34178.7	37948.7	29916.2	27976.6	29687.6	46002.2	68046.5	0.29011	0.234991	0.983902
sp|D3YZP9|CCDC6_MOUSE	D3YZP9	CCDC6_MOUSE	Ccdc6	Coiled-coil domain-containing protein 6	45906.5	40018.5	35503.4	34347.6	33766.2	36511.2	36034.4	36739.6	0.290017	-0.00878053	0.0503618
sp|Q8QZS1|HIBCH_MOUSE	Q8QZS1	HIBCH_MOUSE	Hibch	3-hydroxyisobutyryl-CoA hydrolase, mitochondrial	49121	36909.1	41691.1	31813.7	40125.1	30248.5	38176.4	33705.3	0.289809	0.0628053	0.0305905
sp|Q3UFS0|ZY11B_MOUSE	Q3UFS0	ZY11B_MOUSE	Zyg11b	Protein zyg-11 homolog B	36454.4	42094.8	48635.9	30522.8	29580.9	34703.6	43708	45481.6	0.289127	0.300279	0.472405
sp|Q60974|NCOR1_MOUSE	Q60974	NCOR1_MOUSE	Ncor1	Nuclear receptor corepressor 1	29358.3	38492.1	30951.1	30472.9	28941	26601	42415.9	71671.2	0.288776	0.145222	1.03848
sp|Q9ES46|PARVB_MOUSE	Q9ES46	PARVB_MOUSE	Parvb	Beta-parvin	46496.4	29609.2	42857.2	34638.6	34077	28224.9	45977.9	43174.9	0.288727	0.314843	0.517006
sp|P23198|CBX3_MOUSE	P23198	CBX3_MOUSE	Cbx3	Chromobox protein homolog 3	47065.6	38679.9	36601.5	34139.5	36127.7	34122.3	33366.5	37803.1	0.287563	0.0100506	0.0187644
sp|Q61024|ASNS_MOUSE	Q61024	ASNS_MOUSE	Asns	Asparagine synthetase [glutamine-hydrolyzing]	33617.2	34581.4	29549.6	33065.7	26921.2	29005.9	48894.4	72388.6	0.286194	0.162967	1.11676
sp|Q9CR57|RL14_MOUSE	Q9CR57	RL14_MOUSE	Rpl14	60S ribosomal protein L14	54122.7	37416	29082.8	26078.7	40597.9	34573.8	23831.4	33280.5	0.284192	-0.446527	-0.396398
sp|Q8BTY1|KAT1_MOUSE	Q8BTY1	KAT1_MOUSE	Ccbl1	Kynurenine--oxoglutarate transaminase 1	40623.7	41645.7	27518.5	30665.7	34376.5	33193.3	41340.9	39999.5	0.283977	-0.21575	0.267595
sp|P38532|HSF1_MOUSE	P38532	HSF1_MOUSE	Hsf1	Heat shock factor protein 1	37372.5	43787	34529.8	38945.1	31058.4	35613.2	26846.2	35856.2	0.283688	0.14018	-0.0885521
sp|Q8CHY6|P66A_MOUSE	Q8CHY6	P66A_MOUSE	Gatad2a	Transcriptional repressor p66 alpha	36345.5	33004.7	33285.6	29891.8	28916.4	28121.5	49386.5	63604.1	0.281977	0.147487	0.986208
sp|P0C872|JMJD7_MOUSE	P0C872	JMJD7_MOUSE	Jmjd7	JmjC domain-containing protein 7	36682.4	50964.9	24729	26197.9	39350	32748.3	40374.2	36170.5	0.281744	-0.501539	0.0863378
sp|Q9Z2W0|DNPEP_MOUSE	Q9Z2W0	DNPEP_MOUSE	Dnpep	Aspartyl aminopeptidase	35927.2	43844	32893.8	35260.7	32074.8	33574.3	35080.2	52894.2	0.281091	0.0540306	0.422307
sp|Q8R5L3|VPS39_MOUSE	Q8R5L3	VPS39_MOUSE	Vps39	Vam6/Vps39-like protein	47604.7	42934.9	40487.7	29984	38999	35530.1	33686.8	26387	0.280746	-0.0807599	-0.311068
sp|Q00PI9|HNRL2_MOUSE	Q00PI9	HNRL2_MOUSE	Hnrnpul2	Heterogeneous nuclear ribonucleoprotein U-like protein 2	23884.1	20371	18074.8	19002.8	18218.1	18213.8	72169.8	123456	0.280645	0.025349	2.42483
sp|P62305|RUXE_MOUSE	P62305	RUXE_MOUSE	Snrpe	Small nuclear ribonucleoprotein E	21214.6	19028.2	22861.5	19041.4	16348.4	16804.8	73605	140976	0.279582	0.337898	2.6943
sp|P46664|PURA2_MOUSE	P46664	PURA2_MOUSE	Adss	Adenylosuccinate synthetase isozyme 2	39868.9	35122.4	50920.1	31054.8	29557.4	32311.7	42220.5	49112.2	0.277505	0.405963	0.561913
sp|Q8CEC6|PPWD1_MOUSE	Q8CEC6	PPWD1_MOUSE	Ppwd1	Peptidylprolyl isomerase domain and WD repeat-containing protein 1	25695.1	24749	20275.1	21927.9	20273.5	21347.8	72021.3	109066	0.277364	0.0200243	2.12129
sp|Q91YY4|ATPF2_MOUSE	Q91YY4	ATPF2_MOUSE	Atpaf2	ATP synthase mitochondrial F1 complex assembly factor 2	45052.1	43457.8	26402.9	31389.4	39342.8	33793.1	33022.8	36142.7	0.275261	-0.339703	-0.0805257
sp|Q61171|PRDX2_MOUSE	Q61171	PRDX2_MOUSE	Prdx2	Peroxiredoxin-2	34526.9	38057.4	41098.9	33873.4	31839.4	28230.3	38615.1	52612.7	0.273018	0.31972	0.602836
sp|Q9D2X5|SCC4_MOUSE	Q9D2X5	SCC4_MOUSE	Mau2	MAU2 chromatid cohesion factor homolog	35729.4	41724.7	37794.7	44088.1	26134.7	37970.3	31847.2	47738.9	0.272907	0.353127	0.312081
sp|Q8CG46|SMC5_MOUSE	Q8CG46	SMC5_MOUSE	Smc5	Structural maintenance of chromosomes protein 5	36140.1	39997.1	36535.1	37394.1	31058.9	32023.3	37565.5	42549.9	0.271367	0.228912	0.344845
sp|Q9CZ44|NSF1C_MOUSE	Q9CZ44	NSF1C_MOUSE	Nsfl1c	NSFL1 cofactor p47	41129	28770.6	35115.7	32617	32383	25536.7	50330.6	49758.4	0.271231	0.2258	0.789158
sp|P07724|ALBU_MOUSE	P07724	ALBU_MOUSE	Alb	Serum albumin	30703.1	42966.5	64058.1	20484.7	20022.8	41026.8	23488	28048.6	0.271086	0.4697	-0.244385
sp|Q9CZS1|AL1B1_MOUSE	Q9CZS1	AL1B1_MOUSE	Aldh1b1	Aldehyde dehydrogenase X, mitochondrial	42693.6	40210.6	36665	37509.3	33035.8	35672	34559.1	38979.5	0.270971	0.110446	0.0980272
sp|Q8BPY9|FIGL1_MOUSE	Q8BPY9	FIGL1_MOUSE	Fignl1	Fidgetin-like protein 1	44696.3	33513.4	30016.3	33534.9	26457.6	38369.1	37459.4	57414.4	0.270761	-0.0286692	0.549422
sp|Q921S7|RM37_MOUSE	Q921S7	RM37_MOUSE	Mrpl37	39S ribosomal protein L37, mitochondrial	11087.2	11154.2	64802.7	144829	9922.31	8523.34	12227.9	16081.1	0.269969	3.50651	0.617979
sp|Q3TPX4|EXOC5_MOUSE	Q3TPX4	EXOC5_MOUSE	Exoc5	Exocyst complex component 5	42610.8	45381.6	34960.2	26902	45282.3	27750.5	34338.2	48020.3	0.268834	-0.239489	0.173372
sp|Q61792|LASP1_MOUSE	Q61792	LASP1_MOUSE	Lasp1	LIM and SH3 domain protein 1	43510.4	38045.2	44233.7	32672.1	32962.8	34734.9	35042.7	32815.3	0.268676	0.183984	0.00340967
sp|O88696|CLPP_MOUSE	O88696	CLPP_MOUSE	Clpp	ATP-dependent Clp protease proteolytic subunit, mitochondrial	44975.8	36011.9	33860.9	38974.1	34443.6	32799.6	39550	36086.3	0.268313	0.115243	0.16969
sp|Q9QXX8|NUFP1_MOUSE	Q9QXX8	NUFP1_MOUSE	Nufip1	Nuclear fragile X mental retardation-interacting protein 1	33736.6	37566.6	26581.3	25843.7	34302.2	24941.2	51632.7	61963.4	0.267313	-0.176398	0.939188
tr|G5E924|G5E924_MOUSE	G5E924	G5E924_MOUSE	Hnrnpl	Heterogeneous nuclear ribonucleoprotein L (Fragment)	27832.9	25413.7	20527.3	22929.5	22972.5	21271.9	66942	87662	0.267195	-0.0259148	1.80501
sp|Q9D5T0|ATAD1_MOUSE	Q9D5T0	ATAD1_MOUSE	Atad1	ATPase family AAA domain-containing protein 1	46841.7	43204.5	32197.4	29845	38970.5	35859.9	28225	40250.8	0.26704	-0.270372	-0.12803
sp|P07356|ANXA2_MOUSE	P07356	ANXA2_MOUSE	Anxa2	Annexin A2	42635.1	40916.8	53063.6	33896.5	30950.5	38484.7	24519.6	32286.9	0.267005	0.324687	-0.289612
sp|Q3TYA6|MPP8_MOUSE	Q3TYA6	MPP8_MOUSE	Mphosph8	M-phase phosphoprotein 8	39841.2	28285.4	43070.2	26764	30622.4	25997.6	54083.1	62471.6	0.266906	0.302622	1.04162
sp|Q9WVA4|TAGL2_MOUSE	Q9WVA4	TAGL2_MOUSE	Tagln2	Transgelin-2	48430.3	37000.7	41709.7	29613.8	36837.6	34167.8	33587	26307.7	0.266832	0.00644993	-0.245498
sp|P28738|KIF5C_MOUSE	P28738	KIF5C_MOUSE	Kif5c	Kinesin heavy chain isoform 5C	41763.5	42012.6	42071.1	35940.4	30331.8	39369	33542.2	25154.7	0.265364	0.162511	-0.247891
sp|Q62018|CTR9_MOUSE	Q62018	CTR9_MOUSE	Ctr9	RNA polymerase-associated protein CTR9 homolog	44195.3	27623.6	29005.5	30322	28499.6	31255.4	46952.6	57934.9	0.265304	-0.0103591	0.81171
sp|Q9R1C7|PR40A_MOUSE	Q9R1C7	PR40A_MOUSE	Prpf40a	Pre-mRNA-processing factor 40 homolog A	18189.1	13371.9	18932.1	9157.4	15413.5	10905.8	111718	124246	0.262027	0.0939123	3.16438
sp|Q9DCA5|BRX1_MOUSE	Q9DCA5	BRX1_MOUSE	Brix1	Ribosome biogenesis protein BRX1 homolog	45900.4	40658	35872.6	40637.7	34304	37908.9	33853.1	34376.1	0.261416	0.0833963	-0.0818666
sp|Q8R205|ZC3HA_MOUSE	Q8R205	ZC3HA_MOUSE	Zc3h10	Zinc finger CCCH domain-containing protein 10	26407.9	24617.3	17805.5	17798.8	20009.9	22630.4	78138.4	108134	0.258994	-0.260166	2.12713
sp|Q5SVQ0|KAT7_MOUSE	Q5SVQ0	KAT7_MOUSE	Kat7	Histone acetyltransferase KAT7	40661.6	31739.5	33013.1	31711.8	30690.1	29816.3	49621.3	57535.8	0.258922	0.0972325	0.824567
sp|Q9Z321|TOP3B_MOUSE	Q9Z321	TOP3B_MOUSE	Top3b	DNA topoisomerase 3-beta-1	38230.3	40677.8	36744.8	38175.6	30171.4	35778.1	43272.9	41919.1	0.258812	0.183998	0.369356
sp|O70591|PFD2_MOUSE	O70591	PFD2_MOUSE	Pfdn2	Prefoldin subunit 2	37749.6	49625.8	60820.3	34521.4	31431.9	41613.2	30163.5	30860.4	0.25844	0.38432	-0.259413
sp|Q5SFM8|RBM27_MOUSE	Q5SFM8	RBM27_MOUSE	Rbm27	RNA-binding protein 27	27146.2	23264.6	22762.1	21287.4	21524.9	20644.8	75227	101690	0.257523	0.0629199	2.06879
sp|Q8BH57|WDR48_MOUSE	Q8BH57	WDR48_MOUSE	Wdr48	WD repeat-containing protein 48	38678.4	38268.3	22939.1	37124.9	31412.9	32994.9	46208.9	41501.1	0.256625	-0.100734	0.445507
sp|Q9D0I9|SYRC_MOUSE	Q9D0I9	SYRC_MOUSE	Rars	Arginine--tRNA ligase, cytoplasmic	51340	35160.6	32861	35575.6	37462.1	34960.3	33614.3	29294.9	0.256274	-0.0816681	-0.203165
tr|F6ZFU0|F6ZFU0_MOUSE	F6ZFU0	F6ZFU0_MOUSE	Eef1d	Elongation factor 1-delta (Fragment)	39262.1	39122.8	40607.5	34623.7	32966	32664.5	39201	43329.6	0.256208	0.196963	0.330563
sp|O88271|CFDP1_MOUSE	O88271	CFDP1_MOUSE	Cfdp1	Craniofacial development protein 1	35475.9	23636.9	19059.2	21744.2	25839.3	23656.6	66884.3	88046	0.256162	-0.278617	1.64624
sp|P51150|RAB7A_MOUSE	P51150	RAB7A_MOUSE	Rab7a	Ras-related protein Rab-7a	55801.1	35520	41488.2	30940.9	39802.9	36709.2	32260.3	24435.8	0.25526	-0.0791177	-0.43244
sp|Q91X20|ASH2L_MOUSE	Q91X20	ASH2L_MOUSE	Ash2l	Set1/Ash2 histone methyltransferase complex subunit ASH2	33080.6	32057.1	27618.3	30593.1	24761.8	29827.6	51837.3	75168.2	0.25487	0.0926795	1.2182
sp|P56546|CTBP2_MOUSE	P56546	CTBP2_MOUSE	Ctbp2	C-terminal-binding protein 2	41004.5	37302.8	36612.5	37044.1	30790	34870.8	34986.3	49347.1	0.254113	0.165783	0.361071
sp|Q8K297|GT251_MOUSE	Q8K297	GT251_MOUSE	Colgalt1	Procollagen galactosyltransferase 1	33983.3	42707.5	41341.7	35261	34035.6	30336.7	38686.2	42894	0.252613	0.250955	0.341777
sp|Q8C4X2|KC1G3_MOUSE	Q8C4X2	KC1G3_MOUSE	Csnk1g3	Casein kinase I isoform gamma-3	39605.4	43235.8	36705.7	37273.9	35208.3	34333.5	32993.8	42224.7	0.252469	0.0892478	0.113208
sp|Q9QY81|PO210_MOUSE	Q9QY81	PO210_MOUSE	Nup210	Nuclear pore membrane glycoprotein 210	45215.2	39096.3	40977.2	40536.8	34924.3	36067.2	31132.7	28592.7	0.248083	0.199402	-0.249302
sp|Q3UVK0|ERMP1_MOUSE	Q3UVK0	ERMP1_MOUSE	Ermp1	Endoplasmic reticulum metallopeptidase 1	45822.8	41036.7	36655.6	28079.5	36690.9	36567.3	31017.1	42581.9	0.245692	-0.178442	0.00669576
sp|Q9CQZ5|NDUA6_MOUSE	Q9CQZ5	NDUA6_MOUSE	Ndufa6	NADH dehydrogenase [ubiquinone] 1 alpha subcomplex subunit 6	44277	42175.7	33934.5	39701	36601.6	36331.9	32762.8	29945.1	0.245331	0.0138204	-0.217934
sp|Q8BG40|KTNB1_MOUSE	Q8BG40	KTNB1_MOUSE	Katnb1	Katanin p80 WD40 repeat-containing subunit B1	35910.7	48112.6	32736.9	31485.6	35612.8	35299.2	29208.6	48641.2	0.24476	-0.14295	0.134666
sp|Q8BKZ9|ODPX_MOUSE	Q8BKZ9	ODPX_MOUSE	Pdhx	Pyruvate dehydrogenase protein X component, mitochondrial	30873.5	51730.5	40809.2	47191.9	27980.4	41766.9	26562	34293	0.244074	0.335385	-0.196761
sp|P14426|HA13_MOUSE	P14426	HA13_MOUSE	H2-D1	H-2 class I histocompatibility antigen, D-K alpha chain	42527.4	41895.9	50593.5	39280.4	34379.4	36905	22153.2	26343.9	0.244057	0.334317	-0.555688
sp|Q9CQ71|RFA3_MOUSE	Q9CQ71	RFA3_MOUSE	Rpa3	Replication protein A 14 kDa subunit	40655.5	41848.8	32128.6	41415.2	32057.3	37631	29426.7	43392.6	0.243553	0.0776875	0.0634043
sp|Q9DBM1|GPTC1_MOUSE	Q9DBM1	GPTC1_MOUSE	Gpatch1	G patch domain-containing protein 1	28947.5	40412.6	27421.4	40316.8	28469.4	30157.8	48841.9	46814	0.242536	0.208398	0.706283
sp|Q8CGY8|OGT1_MOUSE	Q8CGY8	OGT1_MOUSE	Ogt	UDP-N-acetylglucosamine--peptide N-acetylglucosaminyltransferase 110 kDa subunit	38493	31309.4	36519.8	30640.4	29426.8	29576.8	44348.1	61338.5	0.242474	0.186804	0.840917
sp|Q9Z1B5|MD2L1_MOUSE	Q9Z1B5	MD2L1_MOUSE	Mad2l1	Mitotic spindle assembly checkpoint protein MAD2A	44741	31439.6	35806.1	33749.6	33798.3	30683.6	44956.2	44627.7	0.240528	0.109275	0.474345
sp|Q3V0C5|UBP48_MOUSE	Q3V0C5	UBP48_MOUSE	Usp48	Ubiquitin carboxyl-terminal hydrolase 48	36501.7	34223.2	36936.7	29352	25337.6	34564.9	44603.1	59868.2	0.239603	0.146147	0.80242
sp|Q5SSW2|PSME4_MOUSE	Q5SSW2	PSME4_MOUSE	Psme4	Proteasome activator complex subunit 4	36862.3	42913.8	37802.5	36105.6	31962.7	35628	39138.7	40576.4	0.239132	0.128909	0.23803
sp|Q9D1M0|SEC13_MOUSE	Q9D1M0	SEC13_MOUSE	Sec13	Protein SEC13 homolog	48986.6	37828.3	36930.4	35469	37904.9	35669.2	33898.2	34311	0.238744	-0.0232208	-0.109232
tr|B1ART1|B1ART1_MOUSE	B1ART1	B1ART1_MOUSE	Vps13d	Protein Vps13d	37489.8	47014.7	38762.2	30375.2	32007.8	39610.5	32548.5	45876	0.238698	-0.0508624	0.130975
sp|Q7TSZ8|NACC1_MOUSE	Q7TSZ8	NACC1_MOUSE	Nacc1	Nucleus accumbens-associated protein 1	30889.7	37718.5	25092.7	27374.3	28982.8	29167.2	48295.2	63303.8	0.238604	-0.148369	0.940476
sp|E9Q1P8|I2BP2_MOUSE	E9Q1P8	I2BP2_MOUSE	Irf2bp2	Interferon regulatory factor 2-binding protein 2	41507.6	37509	39589.3	38243	34554.6	32544	36801.4	35225.2	0.235872	0.214086	0.102246
sp|P97386|DNLI3_MOUSE	P97386	DNLI3_MOUSE	Lig3	DNA ligase 3	39733.6	37108.6	42115.9	32747.9	34924.9	30369.4	40191	51078.7	0.234942	0.197311	0.483178
sp|E9Q634|MYO1E_MOUSE	E9Q634	MYO1E_MOUSE	Myo1e	Unconventional myosin-Ie	45050.1	41157.8	42350	34453.8	32021.5	41241.7	29328.1	26788	0.23473	0.0680894	-0.384675
sp|Q9R0Q4|MO4L2_MOUSE	Q9R0Q4	MO4L2_MOUSE	Morf4l2	Mortality factor 4-like protein 2	33882.4	36991.1	36659.4	35012.7	25703.7	34530.8	38735.6	62691.5	0.234654	0.250819	0.751779
sp|Q8BH74|NU107_MOUSE	Q8BH74	NU107_MOUSE	Nup107	Nuclear pore complex protein Nup107	38582.1	46785.1	32270.5	39180.3	32307.7	40259.2	30852.6	33969.6	0.23437	-0.022362	-0.162823
sp|Q8BR90|CE051_MOUSE	Q8BR90	CE051_MOUSE	>sp|Q8BR90|CE051_MOUSE	n/a	44391.5	37764.6	40234.2	33933.2	31251.8	38593.5	36605.2	29483.6	0.234205	0.0866226	-0.0797578
sp|Q60854|SPB6_MOUSE	Q60854	SPB6_MOUSE	Serpinb6	Serpin B6	38361.3	32220.6	44820.3	31065.5	32451.1	27556.4	38167.1	60202.7	0.234154	0.338686	0.713071
sp|Q3UA06|PCH2_MOUSE	Q3UA06	PCH2_MOUSE	Trip13	Pachytene checkpoint protein 2 homolog	38243.5	40327.6	40319.9	39793.7	36653.5	30183	34061	34857.6	0.23336	0.26141	0.0442551
sp|Q8BTM8|FLNA_MOUSE	Q8BTM8	FLNA_MOUSE	Flna	Filamin-A	42535.4	41690.5	35692.6	35932.6	35487.9	36196	33555.5	32854.7	0.232615	-0.00118042	-0.110243
sp|Q8BXZ1|TMX3_MOUSE	Q8BXZ1	TMX3_MOUSE	Tmx3	Protein disulfide-isomerase TMX3	43212.9	39653.2	46510.7	37050.5	31434.9	39097.4	30068.7	28852.8	0.232498	0.244548	-0.259491
sp|G5E870|TRIPC_MOUSE	G5E870	TRIPC_MOUSE	Trip12	E3 ubiquitin-protein ligase TRIP12	35108.5	37830.6	38076.7	31798.5	31200.1	30889.1	39817.1	51238.8	0.23235	0.170438	0.552411
sp|Q9JHI7|EXOS9_MOUSE	Q9JHI7	EXOS9_MOUSE	Exosc9	Exosome complex component RRP45	42552.3	35284	49805.1	39024.8	31231.2	35053.3	37767.7	30317	0.231771	0.422373	0.0386592
sp|O08709|PRDX6_MOUSE	O08709	PRDX6_MOUSE	Prdx6	Peroxiredoxin-6	33970.9	34607	38190.5	31879.1	30453.7	27947.3	47486	59480.6	0.231754	0.262798	0.873098
sp|P50171|DHB8_MOUSE	P50171	DHB8_MOUSE	Hsd17b8	Estradiol 17-beta-dehydrogenase 8	39744.9	39102.1	27465.4	39745.7	33176.2	33984.2	37253	42913.2	0.231446	0.00108928	0.255383
sp|Q6KCD5|NIPBL_MOUSE	Q6KCD5	NIPBL_MOUSE	Nipbl	Nipped-B-like protein	47855.1	41789.8	41662.3	34522	38209.1	38156.4	30397.2	28223.3	0.231301	-0.00342696	-0.381515
sp|Q9D172|ES1_MOUSE	Q9D172	ES1_MOUSE	D10Jhu81e	ES1 protein homolog, mitochondrial	45030.5	40867.1	34106.4	33623.1	37725.4	35461.6	36271.9	33612.9	0.23103	-0.111802	-0.0666079
sp|P61924|COPZ1_MOUSE	P61924	COPZ1_MOUSE	Copz1	Coatomer subunit zeta-1	41855.7	43367.9	30961	31240.2	39251.2	33363.3	42444.8	30513.7	0.230994	-0.223315	0.00681822
sp|Q6PAV2|HERC4_MOUSE	Q6PAV2	HERC4_MOUSE	Herc4	Probable E3 ubiquitin-protein ligase HERC4	30242.9	37684.6	33679.9	25721.1	32188.6	25709.6	48738.1	64941.6	0.230478	0.0369709	0.973386
sp|Q9QYJ0|DNJA2_MOUSE	Q9QYJ0	DNJA2_MOUSE	Dnaja2	DnaJ homolog subfamily A member 2	42559.3	31481.7	47328.3	26219.4	41051	22088.4	53273.5	38501.9	0.229783	0.220139	0.539566
sp|Q61703|ITIH2_MOUSE	Q61703	ITIH2_MOUSE	Itih2	Inter-alpha-trypsin inhibitor heavy chain H2	34563.6	36574	67769.7	33564.4	28330.5	32375.2	29794.3	28495.1	0.228779	0.739216	-0.058599
sp|A3KG59|P20D2_MOUSE	A3KG59	P20D2_MOUSE	Pm20d2	Peptidase M20 domain-containing protein 2	35698.4	54526.9	31180.6	48349.9	28633.6	48377.2	21349.5	30018	0.228471	0.0464474	-0.584204
sp|Q91WJ8|FUBP1_MOUSE	Q91WJ8	FUBP1_MOUSE	Fubp1	Far upstream element-binding protein 1	15587.6	16654.4	14227.8	13828.5	13205.5	14329.9	90146.8	156928	0.227656	0.0270393	3.16559
sp|Q91VK1|BZW2_MOUSE	Q91VK1	BZW2_MOUSE	Bzw2	Basic leucine zipper and W2 domain-containing protein 2	39872.8	45890.9	35896.6	37469.6	32096.2	41165	30604.8	35683.4	0.227318	0.00206828	-0.144297
tr|E9Q4N7|E9Q4N7_MOUSE	E9Q4N7	E9Q4N7_MOUSE	Arid1b	Protein Arid1b	43017.7	41990.4	17700.3	37878.6	36188.4	36450.9	42673.5	29164	0.226851	-0.386211	-0.0160136
sp|P51949|MAT1_MOUSE	P51949	MAT1_MOUSE	Mnat1	CDK-activating kinase assembly factor MAT1	33789.1	30879.9	33429.1	29596.4	27674.6	27603.8	53356.7	66951.9	0.226359	0.18922	1.12195
sp|Q99LC5|ETFA_MOUSE	Q99LC5	ETFA_MOUSE	Etfa	Electron transfer flavoprotein subunit alpha, mitochondrial	42874.8	36016.4	36884.5	42530.4	32500.1	34977.1	36460	37761.4	0.225466	0.23501	0.137436
sp|Q9ERE2|KRT81_MOUSE	Q9ERE2	KRT81_MOUSE	Krt81	Keratin, type II cuticular Hb1	2278.66	7288.85	663510	3789.33	5673.19	2517.95	2815.68	3408.66	0.22408	6.34813	-0.396143
sp|Q91X84|CRTC3_MOUSE	Q91X84	CRTC3_MOUSE	Crtc3	CREB-regulated transcription coactivator 3	43309.5	40550.1	32807.4	41092.8	37822.8	34011.2	33887.9	28604.9	0.223311	0.0409124	-0.200975
sp|Q9D483|RPC3_MOUSE	Q9D483	RPC3_MOUSE	Polr3c	DNA-directed RNA polymerase III subunit RPC3	38889.5	37650.8	35603.3	34014.7	33303.8	32277.4	38697.5	38877.2	0.222937	0.0861777	0.242305
sp|A6H611|MIPEP_MOUSE	A6H611	MIPEP_MOUSE	Mipep	Mitochondrial intermediate peptidase	44419.8	37849.9	32809.7	32815.6	38304.4	32214.5	41824.8	36058.6	0.222352	-0.103758	0.143305
sp|Q3TWF6|WDR70_MOUSE	Q3TWF6	WDR70_MOUSE	Wdr70	WD repeat-containing protein 70	29231.8	45942.2	31753.8	34961.4	30205.6	34275	43471.9	49791.8	0.22137	0.0491512	0.532452
sp|P62897|CYC_MOUSE	P62897	CYC_MOUSE	Cycs	Cytochrome c, somatic	38580.9	41722.6	39778.5	45293.3	30457	38456.2	26366.5	37301.7	0.220684	0.3039	-0.114207
sp|Q9JL60|GMEB1_MOUSE	Q9JL60	GMEB1_MOUSE	Gmeb1	Glucocorticoid modulatory element-binding protein 1	40922.7	41405.9	21132	22958.1	43290.4	27361.1	43042.3	60857.7	0.220673	-0.680269	0.556403
sp|Q8BWW9|PKN2_MOUSE	Q8BWW9	PKN2_MOUSE	Pkn2	Serine/threonine-protein kinase N2	36298	47640.3	32880.5	39447.1	37160.6	34894.9	33611.1	32712.1	0.220221	0.00543828	-0.119595
sp|P56399|UBP5_MOUSE	P56399	UBP5_MOUSE	Usp5	Ubiquitin carboxyl-terminal hydrolase 5	31788	30799	33418.2	29544.6	29127.3	24602.9	54572.5	70997.2	0.22013	0.228765	1.22468
sp|P43274|H14_MOUSE	P43274	H14_MOUSE	Hist1h1e	Histone H1.4	31007.5	40095.7	54257.7	36111.5	24162.4	36881.2	38028.8	42784.7	0.220075	0.565993	0.404758
sp|Q9ERF3|WDR61_MOUSE	Q9ERF3	WDR61_MOUSE	Wdr61	WD repeat-containing protein 61	31431.6	29352.5	28788.3	27595.6	25767.1	26431.6	53588.4	83043.4	0.219679	0.11127	1.38821
sp|Q91VN6|DDX41_MOUSE	Q91VN6	DDX41_MOUSE	Ddx41	Probable ATP-dependent RNA helicase DDX41	33376.3	34934	27855	30406.1	28631.3	30075.7	47435.3	70087.5	0.21857	-0.0110033	1.00133
sp|Q9JJT0|RCL1_MOUSE	Q9JJT0	RCL1_MOUSE	Rcl1	RNA 3'-terminal phosphate cyclase-like protein	35754.1	42258.3	46913.5	39834.6	27703.9	39341.4	29495.2	42996.4	0.218566	0.371696	0.112675
sp|Q8BXQ2|PIGT_MOUSE	Q8BXQ2	PIGT_MOUSE	Pigt	GPI transamidase component PIG-T	41352.7	42495	40232.4	35055.6	33545.9	38591.3	32735.1	34504.4	0.217029	0.0616782	-0.101433
sp|P25976|UBF1_MOUSE	P25976	UBF1_MOUSE	Ubtf	Nucleolar transcription factor 1	50224.1	41226.2	25402.2	14386.4	44527.6	34157.4	38898.3	53002	0.216899	-0.983735	0.22398
sp|P26443|DHE3_MOUSE	P26443	DHE3_MOUSE	Glud1	Glutamate dehydrogenase 1, mitochondrial	41682.8	39420.9	34969.8	39221.9	34405.9	35385.1	36624	38749.2	0.216727	0.0882164	0.111009
sp|Q7TPM1|PRC2B_MOUSE	Q7TPM1	PRC2B_MOUSE	Prrc2b	Protein PRRC2B	45288.7	37869.4	54086.1	33845.2	37703	33878.7	29675.3	32022.3	0.216265	0.296786	-0.214377
sp|Q3UCQ1|FOXK2_MOUSE	Q3UCQ1	FOXK2_MOUSE	Foxk2	Forkhead box protein K2	38844.7	38829.8	48223.4	37543.8	32936.4	34020.7	37383.7	37216.1	0.214202	0.357188	0.155934
sp|O55234|PSB5_MOUSE	O55234	PSB5_MOUSE	Psmb5	Proteasome subunit beta type-5	35022.9	48370.9	36453.3	30576.3	38651.7	33260.4	31108.2	25225.1	0.213707	-0.101436	-0.352245
sp|P55258|RAB8A_MOUSE	P55258	RAB8A_MOUSE	Rab8a	Ras-related protein Rab-8A	36071.3	37769.3	55925.9	35678.6	30629.1	33048.2	34195.6	38110.8	0.213636	0.52464	0.183346
sp|P62858|RS28_MOUSE	P62858	RS28_MOUSE	Rps28	40S ribosomal protein S28	46071.5	33140.7	39659.5	34083.3	40087.3	28265.1	41099.7	32415.5	0.212731	0.109511	0.105052
sp|Q7TSE6|ST38L_MOUSE	Q7TSE6	ST38L_MOUSE	Stk38l	Serine/threonine-protein kinase 38-like	42857.5	35861.2	37746.9	33431.2	34162.5	33812.4	39124.8	39234.1	0.211703	0.0664304	0.205093
sp|Q6A028|SWP70_MOUSE	Q6A028	SWP70_MOUSE	Swap70	Switch-associated protein 70	38447.5	37708.4	33383.2	35160.6	31537.7	34301.8	40305.8	50127.9	0.210002	0.0580715	0.457905
sp|Q9D0A3|ARPIN_MOUSE	Q9D0A3	ARPIN_MOUSE	Arpin	Arpin	44847.5	37237.8	40967.6	41672.2	34085.2	36882.7	31732.8	31427.4	0.209957	0.219669	-0.168151
sp|Q8VDC0|SYLM_MOUSE	Q8VDC0	SYLM_MOUSE	Lars2	Probable leucine--tRNA ligase, mitochondrial	35619	44527.3	45136.7	39299.9	29793.6	39505.5	31704.2	34737.3	0.209798	0.285031	-0.0607526
sp|P52332|JAK1_MOUSE	P52332	JAK1_MOUSE	Jak1	Tyrosine-protein kinase JAK1	36280.1	50766.4	41172.6	30889.9	39345.2	35921.6	29156.7	32685.6	0.20977	-0.0627675	-0.283422
sp|Q9D6F9|TBB4A_MOUSE	Q9D6F9	TBB4A_MOUSE	Tubb4a	Tubulin beta-4A chain	38816.2	45773.9	34461.2	32389.4	36717.2	36535	32114.3	34288	0.207617	-0.131933	-0.141639
sp|Q99K46|UBP11_MOUSE	Q99K46	UBP11_MOUSE	Usp11	Ubiquitin carboxyl-terminal hydrolase 11	41379.1	37484.3	37461.2	18500.8	36489.6	31873.5	52928.9	42236.4	0.206137	-0.288773	0.477216
sp|Q9D773|RM02_MOUSE	Q9D773	RM02_MOUSE	Mrpl2	39S ribosomal protein L2, mitochondrial	19736.1	13980.6	80559.1	124621	15237.3	13991.7	14181.9	13226.2	0.206062	2.81142	-0.0927998
sp|Q924Z6|XPO6_MOUSE	Q924Z6	XPO6_MOUSE	Xpo6	Exportin-6	34581.3	52347.5	39439.9	25250.5	37099.7	38380.3	36727.3	34400.9	0.203741	-0.222543	-0.0856711
sp|Q9CQR6|PPP6_MOUSE	Q9CQR6	PPP6_MOUSE	Ppp6c	Serine/threonine-protein phosphatase 6 catalytic subunit	43113.9	36403.9	46818.9	32164.5	38363.1	30758.7	44120	36498.6	0.202135	0.192407	0.22197
sp|P48377|RFX1_MOUSE	P48377	RFX1_MOUSE	Rfx1	MHC class II regulatory factor RFX1	30072.2	25299.1	33578	24548.6	29064.5	19086	60272.8	82576.3	0.201589	0.271648	1.56887
sp|Q8JZY2|COMDA_MOUSE	Q8JZY2	COMDA_MOUSE	Commd10	COMM domain-containing protein 10	45087.7	28869.6	57403.9	29130.8	38893.1	25420.1	35459.2	44738.5	0.201577	0.428164	0.318446
sp|O54833|CSK22_MOUSE	O54833	CSK22_MOUSE	Csnk2a2	Casein kinase II subunit alpha'	48839.8	30513.1	40905.8	36769.8	38511.4	30531.5	35353.8	44274.6	0.200791	0.169969	0.205789
tr|Q8C788|Q8C788_MOUSE	Q8C788	Q8C788_MOUSE	Snx18	Sorting nexin	44346.4	30598.7	39927	31259.6	33222.7	32007.2	43920.4	46709.8	0.200299	0.126072	0.474458
sp|Q9DB25|ALG5_MOUSE	Q9DB25	ALG5_MOUSE	Alg5	Dolichyl-phosphate beta-glucosyltransferase	41773.7	38733.5	30332.9	29536.3	36472.1	33624.7	44071.7	38353.7	0.19977	-0.227533	0.233741
sp|Q9CPX7|RT16_MOUSE	Q9CPX7	RT16_MOUSE	Mrps16	28S ribosomal protein S16, mitochondrial	35236.6	43537.9	29656.1	49156.9	31083.8	37518.6	30452.5	33542.5	0.199468	0.200173	-0.100302
sp|P97789|XRN1_MOUSE	P97789	XRN1_MOUSE	Xrn1	5'-3' exoribonuclease 1	40201.8	32557.5	29947.8	30815	32574.4	30829.8	41184.9	28671	0.198552	-0.0613885	0.139803
sp|Q02614|S30BP_MOUSE	Q02614	S30BP_MOUSE	Sap30bp	SAP30-binding protein	29249.8	32505.8	29476.1	29915.5	27167.6	26725.3	52663	77826.6	0.196474	0.140163	1.27577
sp|Q9WUK4|RFC2_MOUSE	Q9WUK4	RFC2_MOUSE	Rfc2	Replication factor C subunit 2	40202.6	31996.1	33284.2	31949.4	31063.2	31946.1	50052.7	50243.5	0.196407	0.0500494	0.670631
sp|Q8BKC5|IPO5_MOUSE	Q8BKC5	IPO5_MOUSE	Ipo5	Importin-5	35418.4	40598.2	51255.5	36893.2	31534.9	34812.6	31616.6	27478	0.196273	0.409898	-0.167016
sp|P31266|SUH_MOUSE	P31266	SUH_MOUSE	Rbpj	Recombining binding protein suppressor of hairless	30138	31415.7	22828.1	27978.8	26342.3	27388.8	56961.5	78307.8	0.196087	-0.0807337	1.332
sp|Q7TT37|ELP1_MOUSE	Q7TT37	ELP1_MOUSE	Ikbkap	Elongator complex protein 1	46297.4	29696.9	36946.5	34025.2	35167.9	31172.1	43577.1	43673.1	0.196013	0.0973632	0.395278
sp|Q9CWJ9|PUR9_MOUSE	Q9CWJ9	PUR9_MOUSE	Atic	Bifunctional purine biosynthesis protein PURH	36352.1	36603.1	27245.7	37234	29385.4	34334.9	43865.8	51144.8	0.195258	0.0170913	0.576335
sp|Q9CW46|RAVR1_MOUSE	Q9CW46	RAVR1_MOUSE	Raver1	Ribonucleoprotein PTB-binding 1	33078.8	28126.5	30188.2	24476.9	26881.1	26595.5	62539	69145.3	0.194748	0.0317117	1.3001
tr|E9Q035|E9Q035_MOUSE	E9Q035	E9Q035_MOUSE	Gm20425	Protein Gm20425	32474.9	41281.1	50630.5	39332.7	29008.2	35436.5	29972.6	28573.5	0.1947	0.481273	-0.138488
sp|Q9DBL2|GDAP2_MOUSE	Q9DBL2	GDAP2_MOUSE	Gdap2	Ganglioside-induced differentiation-associated protein 2	44713.7	35160.6	51683.2	30953	36005.3	33795.3	34415.6	34828.3	0.194492	0.243534	-0.0115541
sp|Q8BP67|RL24_MOUSE	Q8BP67	RL24_MOUSE	Rpl24	60S ribosomal protein L24	40473.9	41923.8	40505.9	39921.5	34459.5	37552.6	27361.2	26930.1	0.194366	0.159449	-0.407515
sp|Q9JMH6|TRXR1_MOUSE	Q9JMH6	TRXR1_MOUSE	Txnrd1	Thioredoxin reductase 1, cytoplasmic	38996.9	33691.5	43686.2	32934	32968.1	30581.8	40499.1	42962.3	0.193837	0.269837	0.393221
sp|Q8VE97|SRSF4_MOUSE	Q8VE97	SRSF4_MOUSE	Srsf4	Serine/arginine-rich splicing factor 4	23494.2	30302.5	27294.4	29306.9	24000.2	23048	56478.1	102680	0.193378	0.266695	1.75824
sp|Q920Q6|MSI2H_MOUSE	Q920Q6	MSI2H_MOUSE	Msi2	RNA-binding protein Musashi homolog 2	41319.3	34728.8	29087.6	34857	32046.9	34495.8	35865.2	43808.2	0.192634	-0.0574566	0.25982
sp|Q9CX00|IST1_MOUSE	Q9CX00	IST1_MOUSE	Ist1	IST1 homolog	42353.6	40052.2	33658.4	35515.8	39092.1	33045.6	30400.6	32863.8	0.191994	-0.0605193	-0.18936
sp|Q60605|MYL6_MOUSE	Q60605	MYL6_MOUSE	Myl6	Myosin light polypeptide 6	42728.2	36095.7	45673.4	32330.7	36964.7	32057.4	36944.6	35160.7	0.191576	0.176493	0.0630461
sp|Q9CR80|FA32A_MOUSE	Q9CR80	FA32A_MOUSE	Fam32a	Protein FAM32A	30882.7	31554.6	30662.7	34603.2	28098.2	26612.8	57066.7	61350.3	0.19058	0.254501	1.11397
sp|Q80Y84|KDM5B_MOUSE	Q80Y84	KDM5B_MOUSE	Kdm5b	Lysine-specific demethylase 5B	28272.7	24299.2	20536.4	26616.9	26829.4	19242.4	71272.3	88138.6	0.190408	0.0334756	1.7908
sp|Q06985|SIA1B_MOUSE	Q06985	SIA1B_MOUSE	Siah1b	E3 ubiquitin-protein ligase SIAH1B	30125.6	38724	28616.3	30944.8	33225.3	27125.6	43439.6	59365	0.190072	-0.0190043	0.768459
sp|Q8BGE6|ATG4B_MOUSE	Q8BGE6	ATG4B_MOUSE	Atg4b	Cysteine protease ATG4B	38123.2	40431.6	38402.3	44713.9	26856.6	42027.3	32383.7	36757	0.189535	0.270964	0.0053699
sp|Q64514|TPP2_MOUSE	Q64514	TPP2_MOUSE	Tpp2	Tripeptidyl-peptidase 2	33688.9	44593.4	38386.2	42691	32805.5	35867.5	31907.5	46924.3	0.188943	0.239554	0.199035
sp|Q91YW3|DNJC3_MOUSE	Q91YW3	DNJC3_MOUSE	Dnajc3	DnaJ homolog subfamily C member 3	48744.9	32628.3	38251.2	29913.9	41115.6	30286.1	29613.2	41498.8	0.188594	-0.0669241	-0.00586545
sp|Q2YDW2|MSTO1_MOUSE	Q2YDW2	MSTO1_MOUSE	Msto1	Protein misato homolog 1	35800.9	37863.8	62276.5	30739.6	29421.7	35302	36737.8	43805.8	0.18668	0.523186	0.315476
sp|P54728|RD23B_MOUSE	P54728	RD23B_MOUSE	Rad23b	UV excision repair protein RAD23 homolog B	34327.2	38962.8	39382.9	38279.5	33542.3	30854.6	42649	38640	0.186626	0.270226	0.336069
tr|E9QAR1|E9QAR1_MOUSE	E9QAR1	E9QAR1_MOUSE	Zfp384	Protein Zfp384	36775.9	36914.7	35344.6	35225.7	32627.3	32146.6	48025.9	57235.1	0.186067	0.123649	0.700485
sp|Q3UHX2|HAP28_MOUSE	Q3UHX2	HAP28_MOUSE	Pdap1	28 kDa heat- and acid-stable phosphoprotein	42024.9	35884.3	34395.5	37362.3	35046.7	33452.5	39746.3	37639.7	0.185707	0.0670486	0.175985
sp|Q9D8U8|SNX5_MOUSE	Q9D8U8	SNX5_MOUSE	Snx5	Sorting nexin-5	35987.9	36906.2	42535.4	31115.2	33518.8	30587.9	45786.2	41551.5	0.185327	0.200223	0.446131
sp|Q689Z5|SBNO1_MOUSE	Q689Z5	SBNO1_MOUSE	Sbno1	Protein strawberry notch homolog 1	34788.2	28032.9	36562	30610	26832.9	28415.5	51645.3	69570.4	0.185317	0.28193	1.13357
sp|Q8C092|TAF5_MOUSE	Q8C092	TAF5_MOUSE	Taf5	Transcription initiation factor TFIID subunit 5	33357.1	42770.6	44751	38103.7	32530.2	34440.3	32837	37947.1	0.184896	0.307059	0.0798998
sp|B7ZMP1|XPP3_MOUSE	B7ZMP1	XPP3_MOUSE	Xpnpep3	Probable Xaa-Pro aminopeptidase 3	42701.9	35840.3	25229.2	32303.2	36635.6	32498.3	39637.3	48481.6	0.184073	-0.26502	0.350055
sp|Q9CPR8|MAGG1_MOUSE	Q9CPR8	MAGG1_MOUSE	Ndnl2	Melanoma-associated antigen G1	36687.4	39755	29599.1	37141.6	31376.4	35939.6	30680.6	48668.8	0.183423	-0.0123814	0.237271
sp|Q78PG9|CCD25_MOUSE	Q78PG9	CCD25_MOUSE	Ccdc25	Coiled-coil domain-containing protein 25	39766.5	39147.8	31240.4	25772.8	37771.5	31725.1	37420.1	56536.9	0.183343	-0.285648	0.435057
sp|O70400|PDLI1_MOUSE	O70400	PDLI1_MOUSE	Pdlim1	PDZ and LIM domain protein 1	39595.2	42487.9	40982.4	36145.8	35269.7	37065	29872	30388.4	0.182396	0.092571	-0.263479
sp|Q99PP7|TRI33_MOUSE	Q99PP7	TRI33_MOUSE	Trim33	E3 ubiquitin-protein ligase TRIM33	38852.4	36221.2	33937.4	39468.2	34960	31209.4	38868.9	39213.3	0.182142	0.149726	0.238829
sp|Q3URS9|CCD51_MOUSE	Q3URS9	CCD51_MOUSE	Ccdc51	Coiled-coil domain-containing protein 51	45524.1	39280.7	38571	32402.2	36860.2	37923	32698.7	25480.3	0.181432	-0.0754398	-0.362213
sp|P83940|ELOC_MOUSE	P83940	ELOC_MOUSE	Tceb1	Transcription elongation factor B polypeptide 1	22953.8	46659.1	38848	43038.2	25841.7	35594.2	33648.3	62006.5	0.180273	0.414538	0.638754
sp|Q9WVK4|EHD1_MOUSE	Q9WVK4	EHD1_MOUSE	Ehd1	EH domain-containing protein 1	42266.3	37667	40111	34451.3	35008.8	35537.3	37517.7	32452.4	0.180231	0.0798821	-0.0118288
sp|P54103|DNJC2_MOUSE	P54103	DNJC2_MOUSE	Dnajc2	DnaJ homolog subfamily C member 2	39303.3	39333.9	40250.8	33839.1	34418.2	34994.3	38772.9	39820.5	0.180017	0.094081	0.179213
sp|Q8C6G8|WDR26_MOUSE	Q8C6G8	WDR26_MOUSE	Wdr26	WD repeat-containing protein 26	41386.7	35969	44014.3	37124.2	33425.5	34905.9	34673.3	45338.3	0.17896	0.24784	0.227662
sp|O09061|PSB1_MOUSE	O09061	PSB1_MOUSE	Psmb1	Proteasome subunit beta type-1	33575.6	47224.6	39705.5	36916	37952.1	33436.8	29328.4	32445	0.17866	0.10205	-0.208714
sp|Q8CCK0|H2AW_MOUSE	Q8CCK0	H2AW_MOUSE	H2afy2	Core histone macro-H2A.2	41254.2	36863	33644.7	23275.9	38864	30165.8	41787.4	55035.4	0.178421	-0.278269	0.488128
sp|Q0VEE6|ZN800_MOUSE	Q0VEE6	ZN800_MOUSE	Znf800	Zinc finger protein 800	39470.3	43247	45835.8	35450.9	34913.8	38211.6	28782	38714	0.177816	0.152647	-0.115571
sp|Q9D2R0|AACS_MOUSE	Q9D2R0	AACS_MOUSE	Aacs	Acetoacetyl-CoA synthetase	37969.3	39746.2	37372.6	31321.6	35201.3	33513.9	39565.5	43086.7	0.177572	-0.000440724	0.266425
sp|Q9DB34|CHM2A_MOUSE	Q9DB34	CHM2A_MOUSE	Chmp2a	Charged multivesicular body protein 2a	32830.7	38047.7	32327	36902.9	28070.2	34602.3	44761.6	50466.6	0.177515	0.143563	0.603558
sp|P47757-2|CAPZB_MOUSE	P47757-2	CAPZB_MOUSE	Capzb	Isoform 2 of F-actin-capping protein subunit beta	51258	28967.9	48546.8	22311.3	42220.4	28718.8	44233.8	30511	0.177486	-0.00164981	0.0753891
tr|E9Q8X5|E9Q8X5_MOUSE	E9Q8X5	E9Q8X5_MOUSE	Zbtb10	Protein Zbtb10	47322.9	31396.7	41661.9	42932.2	35385.1	34233.5	33427.4	27994.2	0.177249	0.281085	-0.180726
sp|Q9CQN1|TRAP1_MOUSE	Q9CQN1	TRAP1_MOUSE	Trap1	Heat shock protein 75 kDa, mitochondrial	43008.9	38807.7	35375.7	37341	37009.8	35350.8	36714.4	35059.3	0.177189	0.00708044	-0.01175
sp|P49117|NR2C2_MOUSE	P49117	NR2C2_MOUSE	Nr2c2	Nuclear receptor subfamily 2 group C member 2	37806.6	35652	28554.6	36938	34369.6	30636.8	38883.2	52880.6	0.176348	0.0107493	0.497342
sp|Q80YA7|DPP8_MOUSE	Q80YA7	DPP8_MOUSE	Dpp8	Dipeptidyl peptidase 8	40045.9	42576.5	36660.8	40248	38046.5	35084.7	32012	28777.8	0.176046	0.0726617	-0.266659
sp|Q80X90|FLNB_MOUSE	Q80X90	FLNB_MOUSE	Flnb	Filamin-B	42443.2	37927.5	38201.7	36790	35061.2	36080.6	34005.8	33270	0.175973	0.076032	-0.0806098
sp|Q9D114|MESH1_MOUSE	Q9D114	MESH1_MOUSE	Hddc3	Guanosine-3',5'-bis(diphosphate) 3'-pyrophosphohydrolase MESH1	35487.6	41750.8	51127.5	32898.3	32605.9	35801.1	30279.4	29693.2	0.175174	0.296688	-0.189842
tr|Q8R2T7|Q8R2T7_MOUSE	Q8R2T7	Q8R2T7_MOUSE	Osbpl10	Oxysterol-binding protein	37347.3	40151.3	37769	39760.8	29794.5	38874	31511.4	38742.4	0.174522	0.175103	0.0329282
sp|P16125|LDHB_MOUSE	P16125	LDHB_MOUSE	Ldhb	L-lactate dehydrogenase B chain	42759.5	46502.6	20289	25714.8	46266.1	32865.7	34980.9	36334.8	0.17379	-0.782506	-0.150037
sp|P24788|CD11B_MOUSE	P24788	CD11B_MOUSE	Cdk11b	Cyclin-dependent kinase 11B	31321	27975.5	23751.7	27355.8	23651.2	28917.5	57642.1	85606.2	0.17374	-0.0406737	1.44624
sp|Q8VDP6|CDIPT_MOUSE	Q8VDP6	CDIPT_MOUSE	Cdipt	CDP-diacylglycerol--inositol 3-phosphatidyltransferase	36412.9	43066.5	30861.4	33037	38239.5	32262.8	39325.1	38195.3	0.17291	-0.14189	0.136907
sp|Q91VM3|WIPI4_MOUSE	Q91VM3	WIPI4_MOUSE	Wdr45	WD repeat domain phosphoinositide-interacting protein 4	36802.7	42086.1	30154.1	32955.5	33422.9	36577.3	35321.2	60072.2	0.172463	-0.149497	0.446531
sp|Q9Z2G0|FEM1B_MOUSE	Q9Z2G0	FEM1B_MOUSE	Fem1b	Protein fem-1 homolog B	41001.3	38138.2	39981.3	33612.5	36508.2	33730.9	33793.8	34483.7	0.172124	0.0673118	-0.0408625
sp|O09172|GSH0_MOUSE	O09172	GSH0_MOUSE	Gclm	Glutamate--cysteine ligase regulatory subunit	39906.7	38818.3	28734.6	31926.1	36780.1	33139.5	37806.6	43337.6	0.171126	-0.204935	0.214792
sp|P19536|COX5B_MOUSE	P19536	COX5B_MOUSE	Cox5b	Cytochrome c oxidase subunit 5B, mitochondrial	35703.1	37759.2	35523.5	34768.3	39896.7	25364.2	37438.8	34184.4	0.170783	0.107135	0.134207
sp|P84104|SRSF3_MOUSE	P84104	SRSF3_MOUSE	Srsf3	Serine/arginine-rich splicing factor 3	24326.4	21202.4	21796	21140.5	20865.9	19583.9	79846.9	101205	0.170648	0.0860718	2.1622
sp|Q8C3Y4|KNTC1_MOUSE	Q8C3Y4	KNTC1_MOUSE	Kntc1	Kinetochore-associated protein 1	35997.7	30843.9	34589.1	36074.7	29086.9	30298.4	39742.3	50422.8	0.170638	0.250863	0.602462
sp|Q63850|NUP62_MOUSE	Q63850	NUP62_MOUSE	Nup62	Nuclear pore glycoprotein p62	32462.6	44118.1	39436.6	43907	32427.4	35683.7	32622.5	39407.6	0.169092	0.291182	0.0807118
sp|Q9ER81|IFG15_MOUSE	Q9ER81	IFG15_MOUSE	Tor1aip2	Torsin-1A-interacting protein 2, isoform IFRG15	37494.5	41577.7	24240.1	22121.8	42090.5	28251	36921	59059.5	0.168795	-0.601434	0.448367
sp|O88532|ZFR_MOUSE	O88532	ZFR_MOUSE	Zfr	Zinc finger RNA-binding protein	24856.1	27035.7	20406.5	23485.1	23139.9	23034	67570.7	97501.1	0.16843	-0.0731316	1.83794
sp|Q8VC42|MIC1_MOUSE	Q8VC42	MIC1_MOUSE	Mic1	Uncharacterized protein C18orf8 homolog	44408.5	37390.7	37780.1	41165.1	30835.6	41971.1	29185.3	38268.3	0.168016	0.11678	-0.110177
sp|Q9CXZ1|NDUS4_MOUSE	Q9CXZ1	NDUS4_MOUSE	Ndufs4	NADH dehydrogenase [ubiquinone] iron-sulfur protein 4, mitochondrial	40082.6	35204	37522.4	41622.4	33881.7	33150.2	36680.5	35096.1	0.167545	0.239647	0.0986652
sp|Q8K2V6|IPO11_MOUSE	Q8K2V6	IPO11_MOUSE	Ipo11	Importin-11	35349.6	31496	35759.8	32180.3	29624.9	29896	50289.7	56777.4	0.167436	0.190867	0.847047
sp|Q64127|TIF1A_MOUSE	Q64127	TIF1A_MOUSE	Trim24	Transcription intermediary factor 1-alpha	39365.8	31904.5	42535.9	33977.6	30009.9	33472.7	44178.3	55566.5	0.16694	0.269352	0.651879
sp|P05202|AATM_MOUSE	P05202	AATM_MOUSE	Got2	Aspartate aminotransferase, mitochondrial	34215.7	43776.7	39543.5	41110.2	32712	36763.8	33712.2	32491.3	0.166824	0.215231	-0.0696027
sp|P07901|HS90A_MOUSE	P07901	HS90A_MOUSE	Hsp90aa1	Heat shock protein HSP 90-alpha	40314.2	38643.8	36038.2	37088.5	34143.5	36197.8	34186	37760.8	0.166713	0.056026	0.0325571
sp|O08528|HXK2_MOUSE	O08528	HXK2_MOUSE	Hk2	Hexokinase-2	35860.9	36354.3	34776.1	34522.3	30603.2	33742	45897.6	49130.8	0.166472	0.106988	0.562526
sp|Q9CZU3|SK2L2_MOUSE	Q9CZU3	SK2L2_MOUSE	Skiv2l2	Superkiller viralicidic activity 2-like 2	29463.7	36221.4	31691.8	32581.1	27921.9	30609	44105.1	72432	0.166367	0.135012	0.993519
sp|Q8K310|MATR3_MOUSE	Q8K310	MATR3_MOUSE	Matr3	Matrin-3	27115.3	26646.8	23461.3	26800.6	23452.6	24475.5	59253.5	85560.1	0.165718	0.0685953	1.59525
sp|P36916|GNL1_MOUSE	P36916	GNL1_MOUSE	Gnl1	Guanine nucleotide-binding protein-like 1	44266.5	33724.3	52401.9	31132.5	36924.5	32619.7	36464.9	36406.9	0.165371	0.264439	0.0674292
sp|O55201|SPT5H_MOUSE	O55201	SPT5H_MOUSE	Supt5h	Transcription elongation factor SPT5	29966.1	28072.5	27283.1	27815.2	25997.8	25764.3	61108.4	79561.6	0.165116	0.0901112	1.44235
sp|Q8BSK8|KS6B1_MOUSE	Q8BSK8	KS6B1_MOUSE	Rps6kb1	Ribosomal protein S6 kinase beta-1	32862.5	40589.1	34898.7	37046.5	34027.1	31484	35801.5	41960.5	0.165057	0.13516	0.247327
sp|Q8CH02|SUGP1_MOUSE	Q8CH02	SUGP1_MOUSE	Sugp1	SURP and G-patch domain-containing protein 1	28882.6	28002.1	35387	25656.6	27528.6	23240.3	58348.7	90175.6	0.164095	0.265894	1.54868
sp|Q9QZH3|PPIE_MOUSE	Q9QZH3	PPIE_MOUSE	Ppie	Peptidyl-prolyl cis-trans isomerase E	40304.1	31135.8	25851.5	21793.4	35123.5	28647	55993.1	61721.3	0.163839	-0.420569	0.884327
sp|Q8R035|ICT1_MOUSE	Q8R035	ICT1_MOUSE	Ict1	Peptidyl-tRNA hydrolase ICT1, mitochondrial	14450.3	11679.7	65565.4	127637	9111.45	14214.6	14117.9	23327.2	0.163762	3.0501	0.682834
sp|Q9DBJ1|PGAM1_MOUSE	Q9DBJ1	PGAM1_MOUSE	Pgam1	Phosphoglycerate mutase 1	40340	42965.2	35728.7	34327.5	40457.7	33923.8	30469.5	32096.9	0.163462	-0.0864319	-0.249558
sp|Q9QYA2|TOM40_MOUSE	Q9QYA2	TOM40_MOUSE	Tomm40	Mitochondrial import receptor subunit TOM40 homolog	40117.4	35961.6	31721.5	38514.2	34541.9	33420.5	37421.1	37838.5	0.162762	0.0474685	0.147141
sp|Q60575-3|KIF1B_MOUSE	Q60575-3	KIF1B_MOUSE	Kif1b	Isoform 3 of Kinesin-like protein KIF1B	37251.5	39715.4	40846.2	28903.5	29208.9	39549.7	36354	30382.3	0.162697	0.0206471	-0.0430692
sp|Q62077|PLCG1_MOUSE	Q62077	PLCG1_MOUSE	Plcg1	1-phosphatidylinositol 4,5-bisphosphate phosphodiesterase gamma-1	42693.7	36565.7	46751.1	32152	40584.7	30261.8	33099.7	32456	0.161886	0.155386	-0.111975
sp|Q61026|NCOA2_MOUSE	Q61026	NCOA2_MOUSE	Ncoa2	Nuclear receptor coactivator 2	39418.5	34441.2	30520.7	33261.3	37925.7	28102.3	44055.4	31013.6	0.161709	-0.0499281	0.185138
sp|Q8VI36|PAXI_MOUSE	Q8VI36	PAXI_MOUSE	Pxn	Paxillin	40951.9	38765.7	37441	35973.1	38166	33128.1	31869.4	29450.5	0.161116	0.0422764	-0.217426
sp|Q924C1|XPO5_MOUSE	Q924C1	XPO5_MOUSE	Xpo5	Exportin-5	21817.1	23283.6	24658.3	20311.4	18763.7	21573.5	76114.7	110866	0.161037	0.156843	2.21271
sp|Q99KN2|CIAO1_MOUSE	Q99KN2	CIAO1_MOUSE	Ciao1	Probable cytosolic iron-sulfur protein assembly protein CIAO1	38007.6	40183.4	25462.3	40505.8	31885.9	38088.5	33791	37947.3	0.160174	-0.0850599	0.0359176
sp|P22935|RABP2_MOUSE	P22935	RABP2_MOUSE	Crabp2	Cellular retinoic acid-binding protein 2	36906.9	49624.5	20525.7	37490	37221.3	40278.9	31754.9	34307.2	0.159025	-0.417756	-0.230376
sp|P33174|KIF4_MOUSE	P33174	KIF4_MOUSE	Kif4	Chromosome-associated kinesin KIF4	36444.8	34238.6	33936.3	36482.1	31559.8	31750.3	42918.8	52904.9	0.158935	0.153516	0.597946
sp|Q922L6|NELFD_MOUSE	Q922L6	NELFD_MOUSE	Nelfcd	Negative elongation factor D	45805.2	31597.8	35935.6	29149.2	33970.9	35368.7	44504.7	46913.1	0.158708	-0.0913595	0.398794
sp|Q8C2Q3|RBM14_MOUSE	Q8C2Q3	RBM14_MOUSE	Rbm14	RNA-binding protein 14	22323	22564.4	20140.5	21293	21304.8	18924	78987.7	98740.6	0.158081	0.0425679	2.14337
sp|Q8VDJ3|VIGLN_MOUSE	Q8VDJ3	VIGLN_MOUSE	Hdlbp	Vigilin	45281.6	41147.6	33208	31108.2	36912.5	40566.4	34274.3	33055.7	0.157715	-0.268621	-0.202553
sp|Q9DBR1|XRN2_MOUSE	Q9DBR1	XRN2_MOUSE	Xrn2	5'-3' exoribonuclease 2	29744.5	29019	27595.3	26250.5	26066.5	26614.6	61389.4	73475.7	0.157636	0.03155	1.35616
sp|O88848|ARL6_MOUSE	O88848	ARL6_MOUSE	Arl6	ADP-ribosylation factor-like protein 6	41981.9	35128.1	29257	36129.6	34189	34965.5	41492.1	38315	0.157094	-0.080829	0.206692
sp|Q80SW1|SAHH2_MOUSE	Q80SW1	SAHH2_MOUSE	Ahcyl1	Putative adenosylhomocysteinase 2	34307.6	33180.9	32518.9	31812.1	28902.7	31628.8	48588.2	59008.4	0.156954	0.0878284	0.829874
sp|Q8CJG1|AGO1_MOUSE	Q8CJG1	AGO1_MOUSE	Ago1	Protein argonaute-1	45126.9	30221.2	34403.7	40690.1	33596.9	33986.2	40617.2	41768.5	0.156909	0.15203	0.28573
sp|Q9CQN7|RM41_MOUSE	Q9CQN7	RM41_MOUSE	Mrpl41	39S ribosomal protein L41, mitochondrial	10876.6	11933.2	69160.2	149073	8563.46	11899	9958.03	11376.3	0.156672	3.41482	0.060196
sp|Q60823|AKT2_MOUSE	Q60823	AKT2_MOUSE	Akt2	RAC-beta serine/threonine-protein kinase	44332.8	34021.6	36607.7	29457.9	39284.9	31030.8	40693.4	39608.3	0.156167	-0.0899465	0.191583
sp|O54836|ZMAT3_MOUSE	O54836	ZMAT3_MOUSE	Zmat3	Zinc finger matrin-type protein 3	29550.7	31486.8	36670.2	32126	29887.1	24896.9	50035.3	67314.6	0.155942	0.328572	1.09899
tr|D3YYY8|D3YYY8_MOUSE	D3YYY8	D3YYY8_MOUSE	Arhgef26	Protein Arhgef26	41080.2	29630.5	47882.3	39709.9	34692.7	28823.2	37570.5	40988.2	0.154812	0.463685	0.306654
sp|Q8C729|F126B_MOUSE	Q8C729	F126B_MOUSE	Fam126b	Protein FAM126B	40806.5	42326.9	35093.4	43012	30834.8	43850.9	29763.8	28915.2	0.154594	0.06459	-0.347988
sp|P12382|K6PL_MOUSE	P12382	K6PL_MOUSE	Pfkl	ATP-dependent 6-phosphofructokinase, liver type	36063.5	41128.1	31860.5	34697.9	32426.6	36942.5	39682.2	44009.6	0.154152	-0.0596719	0.270793
sp|Q6PDQ2|CHD4_MOUSE	Q6PDQ2	CHD4_MOUSE	Chd4	Chromodomain-helicase-DNA-binding protein 4	43241.5	36215.5	33458.7	39027.6	34988	36437.7	33496.8	38577.1	0.153731	0.0212634	0.0130324
sp|Q8K385|FRRS1_MOUSE	Q8K385	FRRS1_MOUSE	FRRS1	Ferric-chelate reductase 1	33847	34761.9	27717.8	31621.1	34433.1	27244.2	48784.3	55633.1	0.153657	-0.055762	0.759551
sp|P08228|SODC_MOUSE	P08228	SODC_MOUSE	Sod1	Superoxide dismutase [Cu-Zn]	35057.8	42522.7	31782.1	31019.9	35567.2	34281.1	37793.2	46980.7	0.151469	-0.153414	0.279395
sp|Q8VH51|RBM39_MOUSE	Q8VH51	RBM39_MOUSE	Rbm39	RNA-binding protein 39	27113.1	22202.6	23867.4	21061.8	22296.7	22109.8	77076.8	97904.7	0.151276	0.0168841	1.97836
sp|Q8VDD5|MYH9_MOUSE	Q8VDD5	MYH9_MOUSE	Myh9	Myosin-9	44398.8	35186.9	35493.8	34801.9	36913.2	34771.1	35533.8	33179.6	0.15085	-0.028221	-0.0610661
sp|P52196|THTR_MOUSE	P52196	THTR_MOUSE	Tst	Thiosulfate sulfurtransferase	43056.5	35204.2	34765.8	38031	36654	33859	38697.8	34513.4	0.1504	0.0459874	0.0541771
sp|P42208|SEPT2_MOUSE	P42208	SEPT2_MOUSE	42249	Septin-2	36271.2	39651.1	20476.1	40590.9	35129.9	33299.4	39221.8	30954.8	0.149908	-0.164223	0.0363736
sp|P09411|PGK1_MOUSE	P09411	PGK1_MOUSE	Pgk1	Phosphoglycerate kinase 1	40413.5	36971.1	33642.2	32618.8	34740.4	35012.2	39185.3	45023.3	0.149798	-0.074088	0.27172
sp|P48453|PP2BB_MOUSE	P48453	PP2BB_MOUSE	Ppp3cb	Serine/threonine-protein phosphatase 2B catalytic subunit beta isoform	36475.4	39570.7	30247.8	38089.9	29206.8	39354.8	45292.5	37372.6	0.149471	-0.00471947	0.269876
sp|Q9CRD0|OCAD1_MOUSE	Q9CRD0	OCAD1_MOUSE	Ociad1	OCIA domain-containing protein 1	32026.3	36053.7	39468.6	34449.3	31600.3	29782.2	38626.9	60293.9	0.149403	0.268094	0.688446
sp|P70441|NHRF1_MOUSE	P70441	NHRF1_MOUSE	Slc9a3r1	Na(+)/H(+) exchange regulatory cofactor NHE-RF1	38920.3	40575.7	35468.3	43305	31590	40105.8	28150	38620.9	0.148995	0.135818	-0.102667
sp|Q64511|TOP2B_MOUSE	Q64511	TOP2B_MOUSE	Top2b	DNA topoisomerase 2-beta	44000	36412.9	33436.9	31680.6	37738	34839.7	38650	36965.5	0.147901	-0.156481	0.0591558
sp|Q9CQE3|RT17_MOUSE	Q9CQE3	RT17_MOUSE	Mrps17	28S ribosomal protein S17, mitochondrial	35359.6	46589.4	42000.4	43850	35308.4	38674.7	22289.2	25226.1	0.14753	0.21463	-0.638803
sp|Q6PDG5|SMRC2_MOUSE	Q6PDG5	SMRC2_MOUSE	Smarcc2	SWI/SNF complex subunit SMARCC2	37992.3	36818.1	41175	36133.4	32560.3	34982.1	41261.2	40599.6	0.147445	0.194832	0.27738
sp|P43883|PLIN2_MOUSE	P43883	PLIN2_MOUSE	Plin2	Perilipin-2	39060.6	39666.2	38078.8	35715.2	37934.2	33148.6	37091.2	29676.8	0.147353	0.0540028	-0.0903433
sp|Q3THK7|GUAA_MOUSE	Q3THK7	GUAA_MOUSE	Gmps	GMP synthase [glutamine-hydrolyzing]	35983.5	33449.5	29982.4	31433.6	32083.2	30615.6	47506.6	54828.3	0.147184	-0.0298229	0.706788
sp|Q0VG62|CH059_MOUSE	Q0VG62	CH059_MOUSE	>sp|Q0VG62|CH059_MOUSE	n/a	27923.1	27168.8	33352.1	25051.6	26569.9	23185.3	60930.7	83637.1	0.146995	0.231215	1.53883
sp|Q8JZM0|TFB1M_MOUSE	Q8JZM0	TFB1M_MOUSE	Tfb1m	Dimethyladenosine transferase 1, mitochondrial	36842.4	37001.5	46631.9	39866.8	32256.7	34447.2	33912.4	34775.2	0.146707	0.374907	0.0422783
sp|Q9D3W4|GPN3_MOUSE	Q9D3W4	GPN3_MOUSE	Gpn3	GPN-loop GTPase 3	32214.6	42578.4	43279.6	40455.1	31115	36448.8	43768.4	36736.9	0.146653	0.309574	0.252833
sp|P60762|MO4L1_MOUSE	P60762	MO4L1_MOUSE	Morf4l1	Mortality factor 4-like protein 1	36956.3	32380.8	39174.3	32256.8	31483.5	31163	46768.2	52818.1	0.146395	0.189319	0.668716
sp|Q9R0L6|PCM1_MOUSE	Q9R0L6	PCM1_MOUSE	Pcm1	Pericentriolar material 1 protein	45604.6	38329.7	32311.2	35055.4	41318.3	34579.7	39829.9	31353.3	0.1452	-0.172028	-0.0925258
sp|P63242|IF5A1_MOUSE	P63242	IF5A1_MOUSE	Eif5a	Eukaryotic translation initiation factor 5A-1	33683	35684.4	47357.2	38839.4	28360.8	34375.8	32995.7	40424.6	0.144951	0.458325	0.226873
sp|Q9CY66|GAR1_MOUSE	Q9CY66	GAR1_MOUSE	Gar1	H/ACA ribonucleoprotein complex subunit 1	40402.9	34087.8	37664.2	31402.2	34373	33039.2	42295.5	41738.6	0.144054	0.0349752	0.317968
sp|P35601|RFC1_MOUSE	P35601	RFC1_MOUSE	Rfc1	Replication factor C subunit 1	39948.7	35041.4	50209	29625.8	37491.3	30398.6	41209.2	42740.5	0.143504	0.233821	0.30633
sp|Q9DC48|PRP17_MOUSE	Q9DC48	PRP17_MOUSE	Cdc40	Pre-mRNA-processing factor 17	29155.3	37521.9	18920.3	26389.2	27765.4	32632.3	42138.2	92937.4	0.142699	-0.414683	1.1612
tr|E9PWG2|E9PWG2_MOUSE	E9PWG2	E9PWG2_MOUSE	Trappc8	Protein Trappc8	39496.6	39046.4	40733.9	39179.4	34500.7	36655.6	32234.7	38420.2	0.142491	0.167444	-0.010201
sp|Q9D0F9|PGM1_MOUSE	Q9D0F9	PGM1_MOUSE	Pgm1	Phosphoglucomutase-1	38477.1	37972	46307.6	34334	36821.8	32446.5	37074.4	29829.8	0.142305	0.219329	-0.0500984
sp|O35710|NOCT_MOUSE	O35710	NOCT_MOUSE	Ccrn4l	Nocturnin	29685.6	36524.2	95925.7	29542.3	29814.5	30209.3	47406.5	33217.3	0.141509	1.06371	0.42567
sp|P48678|LMNA_MOUSE	P48678	LMNA_MOUSE	Lmna	Prelamin-A/C	42342.5	35542.9	39617.4	34338.5	34110.5	36499.3	35896.4	37688.6	0.141483	0.0667982	0.0595437
sp|Q99LI7|CSTF3_MOUSE	Q99LI7	CSTF3_MOUSE	Cstf3	Cleavage stimulation factor subunit 3	30296.9	28551.3	25523.1	27469.8	27197.3	26158.2	62429.9	78637.8	0.14136	-0.00983769	1.40268
sp|Q4U2R1|HERC2_MOUSE	Q4U2R1	HERC2_MOUSE	Herc2	E3 ubiquitin-protein ligase HERC2	37317.7	38275.5	55728.7	37873.9	42991.3	25626	35389.5	25698.9	0.139684	0.447975	-0.167673
sp|Q9CWS4|INT11_MOUSE	Q9CWS4	INT11_MOUSE	Cpsf3l	Integrator complex subunit 11	30688.5	36025.1	34258.6	30974.7	30391.3	30247	46388.4	63107.1	0.137751	0.10538	0.85257
sp|P17742|PPIA_MOUSE	P17742	PPIA_MOUSE	Ppia	Peptidyl-prolyl cis-trans isomerase A	37461.2	35636.3	39201.5	33441.6	33709.3	32738	39709.3	44209.1	0.13761	0.128614	0.336775
sp|Q8R3Q6|CCD58_MOUSE	Q8R3Q6	CCD58_MOUSE	Ccdc58	Coiled-coil domain-containing protein 58	35483.4	49166.5	32333.1	35390.1	35085.6	41864.4	27994.1	35507.4	0.137587	-0.184271	-0.277132
tr|E9Q7G0|E9Q7G0_MOUSE	E9Q7G0	E9Q7G0_MOUSE	Numa1	Protein Numa1	34601	34025.9	26813.8	28741.7	31339.3	31067.4	38188.9	84223.1	0.137073	-0.167772	0.971972
sp|Q5SSL4|ABR_MOUSE	Q5SSL4	ABR_MOUSE	Abr	Active breakpoint cluster region-related protein	40413.3	43906.2	36545.1	40371.5	35082.8	41620.2	27159	34007.7	0.136582	0.00401169	-0.326537
sp|Q3U3E2|F117B_MOUSE	Q3U3E2	F117B_MOUSE	Fam117b	Protein FAM117B	40053	48743.3	19320	25043.5	43264.7	37515.7	35475.6	46895.7	0.136494	-0.864634	0.0281357
sp|Q9CWM4|PFD1_MOUSE	Q9CWM4	PFD1_MOUSE	Pfdn1	Prefoldin subunit 1	40722.2	38028.6	34133.9	31903.1	39682.1	31984.2	37954.3	40310.7	0.135999	-0.118021	0.127073
sp|P35486|ODPA_MOUSE	P35486	ODPA_MOUSE	Pdha1	Pyruvate dehydrogenase E1 component subunit alpha, somatic form, mitochondrial	36036.4	40631.7	37827.7	39020.7	36428.9	33345.4	36244.7	39519.5	0.135931	0.139318	0.11882
sp|Q9DCD5|TJAP1_MOUSE	Q9DCD5	TJAP1_MOUSE	Tjap1	Tight junction-associated protein 1	37118.8	37922.1	42029.6	34090.1	36889.5	31409.6	37613.7	41532	0.13581	0.156403	0.212643
sp|O88508|DNM3A_MOUSE	O88508	DNM3A_MOUSE	Dnmt3a	DNA (cytosine-5)-methyltransferase 3A	41814.1	33454.3	42983.3	34489.5	34910.1	33596.6	43737.5	34613.7	0.135798	0.177446	0.193711
sp|P35831|PTN12_MOUSE	P35831	PTN12_MOUSE	Ptpn12	Tyrosine-protein phosphatase non-receptor type 12	38816.4	41760.3	37965.7	36712.8	34953.2	38387.6	31236.2	31947.3	0.135747	0.0260775	-0.215068
sp|Q68EF0|RAB3I_MOUSE	Q68EF0	RAB3I_MOUSE	Rab3ip	Rab-3A-interacting protein	38187.7	40189.4	63755.3	36357.2	35050.9	36292	32066.7	34820.6	0.135662	0.48878	-0.093037
tr|E9Q1Z0|E9Q1Z0_MOUSE	E9Q1Z0	E9Q1Z0_MOUSE	4732456N10Rik	Protein 4732456N10Rik	19855	75072.3	101494	23472.5	29600.6	56813	22195.8	15234.4	0.135565	0.532215	-1.20706
sp|P07742|RIR1_MOUSE	P07742	RIR1_MOUSE	Rrm1	Ribonucleoside-diphosphate reductase large subunit	35258.4	34388.5	38459.4	32716.9	32976.7	30429.1	46814.3	48971.9	0.135445	0.166784	0.595204
sp|O35638|STAG2_MOUSE	O35638	STAG2_MOUSE	Stag2	Cohesin subunit SA-2	45641.9	32135.4	42568.5	34169.7	37601.3	33209.8	41008.8	36443.2	0.135375	0.115969	0.129328
sp|Q80TY0|FNBP1_MOUSE	Q80TY0	FNBP1_MOUSE	Fnbp1	Formin-binding protein 1	39698.2	40576.4	41236.1	39438.7	35401.9	37753	30185.5	30631.5	0.13399	0.141164	-0.266479
sp|Q99JY0|ECHB_MOUSE	Q99JY0	ECHB_MOUSE	Hadhb	Trifunctional enzyme subunit beta, mitochondrial	48433	33583	37413.5	35239.7	40166	34577.5	40748.6	22457.8	0.133957	-0.0409218	-0.241877
sp|Q80TL7|MON2_MOUSE	Q80TL7	MON2_MOUSE	Mon2	Protein MON2 homolog	40545.6	42177.3	43226.6	36573.9	36843	38548.8	31822.8	28951.7	0.133879	0.0819889	-0.310943
sp|Q64521|GPDM_MOUSE	Q64521	GPDM_MOUSE	Gpd2	Glycerol-3-phosphate dehydrogenase, mitochondrial	33025.2	34898.6	40929.7	51706.8	28317.1	33588.7	34817.8	40218.3	0.133841	0.581505	0.27751
sp|P63017|HSP7C_MOUSE	P63017	HSP7C_MOUSE	Hspa8	Heat shock cognate 71 kDa protein	36402.6	39072.7	37235.3	34304	35049.5	33747.1	37334.5	39226.6	0.133667	0.0563979	0.154275
sp|Q569Z6|TR150_MOUSE	Q569Z6	TR150_MOUSE	Thrap3	Thyroid hormone receptor-associated protein 3	19129.1	18501	15802.6	16175.6	16482.2	17831.4	92369.1	126203	0.133108	-0.101694	2.67126
sp|P97355|SPSY_MOUSE	P97355	SPSY_MOUSE	Sms	Spermine synthase	34877.2	43263.4	42750.8	37930.1	32201.4	39076.7	29365.9	30538.2	0.132613	0.178767	-0.250804
sp|P29758|OAT_MOUSE	P29758	OAT_MOUSE	Oat	Ornithine aminotransferase, mitochondrial	42228.7	39022.9	39311.5	35583.1	39535.1	34588.3	38724.7	29170.7	0.132468	0.0149323	-0.126616
sp|P47199|QOR_MOUSE	P47199	QOR_MOUSE	Cryz	Quinone oxidoreductase	37026.2	41561.7	36016.3	37552	33778.7	37951.4	27269.8	41202	0.13173	0.0365066	-0.0670664
sp|P10711|TCEA1_MOUSE	P10711	TCEA1_MOUSE	Tcea1	Transcription elongation factor A protein 1	35724.8	32789.6	36273.6	29912.1	30099.3	32468.7	45192.1	63763.1	0.130983	0.0810966	0.800239
sp|Q9ESJ0|XPO4_MOUSE	Q9ESJ0	XPO4_MOUSE	Xpo4	Exportin-4	32421.9	45980.8	28458.3	32142.9	37491.5	34124.1	35187.3	53071.8	0.130629	-0.240929	0.301471
sp|Q9CRD2|EMC2_MOUSE	Q9CRD2	EMC2_MOUSE	Emc2	ER membrane protein complex subunit 2	38488.6	38904.3	40922.2	34972.2	37758.7	32955.3	33005.2	35432.7	0.130205	0.101999	-0.0472003
sp|Q69ZR2|HECD1_MOUSE	Q69ZR2	HECD1_MOUSE	Hectd1	E3 ubiquitin-protein ligase HECTD1	45798.1	36733.4	33316.4	34430.9	38250.6	37199.9	33976.6	29311.2	0.129416	-0.155365	-0.253602
sp|Q6NVF9|CPSF6_MOUSE	Q6NVF9	CPSF6_MOUSE	Cpsf6	Cleavage and polyadenylation specificity factor subunit 6	23611.8	22451.5	21965.9	20674.9	21238.8	20882.3	77501.8	107999	0.129073	0.0176919	2.13881
sp|P17182|ENOA_MOUSE	P17182	ENOA_MOUSE	Eno1	Alpha-enolase	37496.1	38693.2	36706.4	35483.4	35573	34121.5	35623	35574.6	0.128543	0.0507492	0.0307846
sp|Q99P88|NU155_MOUSE	Q99P88	NU155_MOUSE	Nup155	Nuclear pore complex protein Nup155	35967.6	42086.6	39425.4	40997.1	33836.1	37594.5	27869.9	33854.8	0.127936	0.171058	-0.210693
sp|Q8BGD9|IF4B_MOUSE	Q8BGD9	IF4B_MOUSE	Eif4b	Eukaryotic translation initiation factor 4B	34255	42285	32857.2	50396.2	31384.3	38679.9	24917.6	35040.9	0.127536	0.248833	-0.224711
sp|P18052|PTPRA_MOUSE	P18052	PTPRA_MOUSE	Ptpra	Receptor-type tyrosine-protein phosphatase alpha	24260.8	44506	31040.9	40701.1	30222.9	32792.2	34229.2	48967.4	0.126014	0.187119	0.400827
sp|Q8JZK9|HMCS1_MOUSE	Q8JZK9	HMCS1_MOUSE	Hmgcs1	Hydroxymethylglutaryl-CoA synthase, cytoplasmic	32299	41231.1	32748.2	47930.8	28001.7	39380.1	26173	38079.7	0.125976	0.259835	-0.0686
sp|Q8VCX5|MICU1_MOUSE	Q8VCX5	MICU1_MOUSE	Micu1	Calcium uptake protein 1, mitochondrial	37842.9	40404.4	38920.6	41269.1	36296.3	35420.6	29100.1	31441.3	0.125726	0.161102	-0.244393
sp|Q9Z0H7|BCL10_MOUSE	Q9Z0H7	BCL10_MOUSE	Bcl10	B-cell lymphoma/leukemia 10	45654.9	27546.4	30251.8	33216.9	37346.7	29748.5	45323.1	40357.2	0.125659	-0.0801632	0.352753
sp|Q9CQ69|QCR8_MOUSE	Q9CQ69	QCR8_MOUSE	Uqcrq	Cytochrome b-c1 complex subunit 8	40097.7	30294.9	29220.8	39800.4	29856.3	34682.3	39990.4	57977.9	0.125262	0.0968772	0.602153
sp|Q8BTW9|PAK4_MOUSE	Q8BTW9	PAK4_MOUSE	Pak4	Serine/threonine-protein kinase PAK 4	41585.5	32490	46913.6	36792	37322.4	30621.8	35490.8	32739.8	0.124646	0.300974	0.00606893
sp|Q60875|ARHG2_MOUSE	Q60875	ARHG2_MOUSE	Arhgef2	Rho guanine nucleotide exchange factor 2	43309.3	32601.1	40735.4	28191.8	37228.9	32415.3	33725.7	64844.3	0.124295	-0.01493	0.501145
tr|E9Q784|E9Q784_MOUSE	E9Q784	E9Q784_MOUSE	Zc3h13	Protein Zc3h13	20989.8	22647.2	33331.6	23823.8	19265.4	20775.8	63209.4	109638	0.124065	0.513406	2.10994
sp|Q8VBT9|ASPC1_MOUSE	Q8VBT9	ASPC1_MOUSE	Aspscr1	Tether containing UBX domain for GLUT4	34518	40205.8	24873.2	34808.8	39208.1	29376.7	39978	40743.5	0.123679	-0.200592	0.235065
sp|P49817|CAV1_MOUSE	P49817	CAV1_MOUSE	Cav1	Caveolin-1	42533.3	31859.5	42686	32290.6	34756.5	33527.6	40001.6	23480.4	0.123613	0.134892	-0.105203
sp|Q8CGK3|LONM_MOUSE	Q8CGK3	LONM_MOUSE	Lonp1	Lon protease homolog, mitochondrial	37583.5	37191.4	40405.6	40683.7	33867.9	34774.2	35727.9	31538.1	0.12346	0.240419	-0.0292162
sp|Q8R5C5|ACTY_MOUSE	Q8R5C5	ACTY_MOUSE	Actr1b	Beta-centractin	41698.5	38826.4	43426.1	36116.4	36720	37249.4	30349.3	30461.9	0.122508	0.104799	-0.28259
sp|Q6PDM2|SRSF1_MOUSE	Q6PDM2	SRSF1_MOUSE	Srsf1	Serine/arginine-rich splicing factor 1	30356.7	27290.7	23446	23134.3	29035.3	23925.1	66626.4	82659.1	0.122342	-0.185193	1.49509
sp|Q6IFX3|K1C40_MOUSE	Q6IFX3	K1C40_MOUSE	Krt40	Keratin, type I cytoskeletal 40	11153.2	12593.4	503089	10273.8	10727.7	11102.4	12316.3	21591.2	0.121405	4.55559	0.635285
sp|Q3UHJ0|AAK1_MOUSE	Q3UHJ0	AAK1_MOUSE	Aak1	AP2-associated protein kinase 1	34211.5	40929.8	39904.3	33236.3	37522	31560.9	43854.5	37344.2	0.121278	0.082345	0.233127
sp|Q91VJ5|PQBP1_MOUSE	Q91VJ5	PQBP1_MOUSE	Pqbp1	Polyglutamine-binding protein 1	43881.8	33882.8	35331	38087.6	34568.5	36946.3	39282.8	30045.7	0.12087	0.0379021	-0.044795
sp|Q80U93|NU214_MOUSE	Q80U93	NU214_MOUSE	Nup214	Nuclear pore complex protein Nup214	38442.3	49604	18591	33984.7	36830.4	44140.7	28933.5	36421.3	0.120854	-0.623013	-0.309116
sp|P40142|TKT_MOUSE	P40142	TKT_MOUSE	Tkt	Transketolase	40129.8	36246.2	35335.4	29624.4	37309.7	32944.8	40536	39184.1	0.120529	-0.113042	0.182353
sp|Q61624|ZN148_MOUSE	Q61624	ZN148_MOUSE	Znf148	Zinc finger protein 148	38695.4	34037.6	30853.5	38184.3	36220	30704	35655.1	54680.2	0.120086	0.0448614	0.432764
sp|Q60749|KHDR1_MOUSE	Q60749	KHDR1_MOUSE	Khdrbs1	KH domain-containing, RNA-binding, signal transduction-associated protein 1	34485.7	26517.3	26834.4	19884.2	27066.2	29073.3	53914.2	90729.4	0.119865	-0.265019	1.36541
sp|Q8VCQ3|NRBF2_MOUSE	Q8VCQ3	NRBF2_MOUSE	Nrbf2	Nuclear receptor-binding factor 2	40131.3	33940.6	42150.2	33511.1	30580	37609	33575	47507.1	0.119387	0.150018	0.249845
sp|Q99L88|SNTB1_MOUSE	Q99L88	SNTB1_MOUSE	Sntb1	Beta-1-syntrophin	44413.3	36855.2	34696.6	31534.9	41033.7	33792.9	38839.4	25799.5	0.119145	-0.176033	-0.211148
sp|P49718|MCM5_MOUSE	P49718	MCM5_MOUSE	Mcm5	DNA replication licensing factor MCM5	37490.7	33967.6	42900.9	26623.1	32522	33282.2	44080.7	47358.2	0.118921	0.0793339	0.47463
sp|Q3UFY7|5NT3B_MOUSE	Q3UFY7	5NT3B_MOUSE	Nt5c3b	7-methylguanosine phosphate-specific 5'-nucleotidase	29693.6	43998.2	37028.5	36663.6	31414.8	36446.3	39636.1	53871.1	0.118919	0.118925	0.462492
sp|P70388|RAD50_MOUSE	P70388	RAD50_MOUSE	Rad50	DNA repair protein RAD50	44285.2	34575.5	38647.7	34935.6	38571.7	34086.4	38491	32139.6	0.118183	0.0182554	-0.0408295
sp|P62315|SMD1_MOUSE	P62315	SMD1_MOUSE	Snrpd1	Small nuclear ribonucleoprotein Sm D1	21169	18156.1	19234.1	19119.1	18439.2	17814.9	82015.6	127818	0.117308	0.0812042	2.53303
sp|Q99K48|NONO_MOUSE	Q99K48	NONO_MOUSE	Nono	Non-POU domain-containing octamer-binding protein	23364.5	25608.9	24664	23956.2	22184.2	22969	69033.3	99623.9	0.117173	0.10673	1.9012
sp|P26638|SYSC_MOUSE	P26638	SYSC_MOUSE	Sars	Serine--tRNA ligase, cytoplasmic	40389.1	35506.8	42633.4	37044.1	34794.9	35185.8	37128.6	38486	0.117066	0.187215	0.111708
sp|Q9D1R9|RL34_MOUSE	Q9D1R9	RL34_MOUSE	Rpl34	60S ribosomal protein L34	45861.8	35922.3	33090.6	39764.9	35725.9	39687.2	29891.7	27896.5	0.117006	-0.0497775	-0.384041
sp|Q9QZ88|VPS29_MOUSE	Q9QZ88	VPS29_MOUSE	Vps29	Vacuolar protein sorting-associated protein 29	35343.4	47582.1	28061.9	42626	37030.4	39443.3	25941.8	32864.6	0.116853	-0.1135	-0.378991
sp|Q9CWU6|UQCC1_MOUSE	Q9CWU6	UQCC1_MOUSE	Uqcc1	Ubiquinol-cytochrome-c reductase complex assembly factor 1	44978.8	36959	45542.1	31238.8	38460.9	37105.9	28577	39341.2	0.116776	0.0229957	-0.153954
sp|Q9QX47|SON_MOUSE	Q9QX47	SON_MOUSE	Son	Protein SON	19905.9	18029.1	17351	15124.4	16668	18323.1	90678.5	128350	0.116541	-0.10764	2.64606
sp|Q8VDW0|DX39A_MOUSE	Q8VDW0	DX39A_MOUSE	Ddx39a	ATP-dependent RNA helicase DDX39A	24943.3	22610.9	22775.1	24132.4	20581.9	23290.4	65697.2	116295	0.116262	0.0965091	2.05249
sp|Q9JIY5|HTRA2_MOUSE	Q9JIY5	HTRA2_MOUSE	Htra2	Serine protease HTRA2, mitochondrial	40687.7	37560.8	33734.4	43750.6	34717.8	37477.6	33402.4	29579	0.116158	0.102011	-0.196981
sp|Q8BWG8|ARRB1_MOUSE	Q8BWG8	ARRB1_MOUSE	Arrb1	Beta-arrestin-1	36350.5	42626.9	38482.5	41896.4	31557.9	41314.4	29164.9	29357.5	0.116068	0.141446	-0.316382
sp|P18654|KS6A3_MOUSE	P18654	KS6A3_MOUSE	Rps6ka3	Ribosomal protein S6 kinase alpha-3	44934.9	35119.3	49751.3	34889.1	36887.9	37027.5	31663.4	28606.1	0.115102	0.195472	-0.294446
sp|Q6IRU5-2|CLCB_MOUSE	Q6IRU5-2	CLCB_MOUSE	Cltb	Isoform 2 of Clathrin light chain B	31868.1	44937.2	35993.5	47364.5	30935	40041	25524.9	35600.8	0.113877	0.231991	-0.215551
sp|O70475|UGDH_MOUSE	O70475	UGDH_MOUSE	Ugdh	UDP-glucose 6-dehydrogenase	30544.4	34958	40417.5	28515.4	30055.4	30512.8	45910.1	62527.7	0.112986	0.186632	0.840233
sp|Q9R099|TBL2_MOUSE	Q9R099	TBL2_MOUSE	Tbl2	Transducin beta-like protein 2	44038.5	47631.9	23708.2	24835.6	45151.2	39615	36127.5	29592.2	0.112968	-0.804203	-0.367163
sp|B2RY56|RBM25_MOUSE	B2RY56	RBM25_MOUSE	Rbm25	RNA-binding protein 25	22726.8	21637.8	21954.5	20666.3	21609.9	19419.5	85142.7	97516.2	0.112749	0.0548985	2.15442
sp|Q9CZ04|CSN7A_MOUSE	Q9CZ04	CSN7A_MOUSE	Cops7a	COP9 signalosome complex subunit 7a	34354.7	41572.9	34743.8	35164.7	34822.6	35423.6	36150.8	41802.2	0.112203	-0.00695156	0.150184
sp|P14152|MDHC_MOUSE	P14152	MDHC_MOUSE	Mdh1	Malate dehydrogenase, cytoplasmic	39956.9	36556.9	35028.6	34875.1	39040.8	31783.2	37150.3	35652.9	0.111483	-0.0188681	0.0397645
tr|E9PYR1|E9PYR1_MOUSE	E9PYR1	E9PYR1_MOUSE	Fbxl18	Protein Fbxl18	45699.9	30778.1	40339.6	38310.1	34898.2	35932.3	35150.5	30755.6	0.110673	0.151069	-0.10396
sp|Q60899|ELAV2_MOUSE	Q60899	ELAV2_MOUSE	Elavl2	ELAV-like protein 2	36613.3	33958.5	32068.2	31616.8	33374	31989.5	47071.1	40964.5	0.110607	-0.0375307	0.429604
sp|Q8R050|ERF3A_MOUSE	Q8R050	ERF3A_MOUSE	Gspt1	Eukaryotic peptide chain release factor GTP-binding subunit ERF3A	38812.1	41966.2	35962.8	34224.6	38076.1	36763.9	35275.4	32192.4	0.110158	-0.0925991	-0.14961
sp|P70302|STIM1_MOUSE	P70302	STIM1_MOUSE	Stim1	Stromal interaction molecule 1	45719.5	37679.5	29999.6	33352	41899.9	35387.4	35129.1	31657	0.1098	-0.286851	-0.210683
sp|Q8CE90|MP2K7_MOUSE	Q8CE90	MP2K7_MOUSE	Map2k7	Dual specificity mitogen-activated protein kinase kinase 7	38723.3	38311.7	27195.9	33589	33062.9	38333.7	37546.4	48845.4	0.10966	-0.232143	0.27504
sp|Q91YS8|KCC1A_MOUSE	Q91YS8	KCC1A_MOUSE	Camk1	Calcium/calmodulin-dependent protein kinase type 1	37559.6	42164.1	41893.9	42959.4	33672.1	40236.2	28580	26227.3	0.109274	0.199236	-0.431369
sp|P48725|PCNT_MOUSE	P48725	PCNT_MOUSE	Pcnt	Pericentrin	36162.2	40850	32980.1	39161.9	36184.3	35251.5	36422.8	31151.6	0.108437	0.0141915	-0.0801715
sp|Q8VEJ4|NLE1_MOUSE	Q8VEJ4	NLE1_MOUSE	Nle1	Notchless protein homolog 1	35690	36613.9	33490.9	32473.1	35009.5	32064.1	42579.4	50850.6	0.108327	-0.0240671	0.478139
sp|Q5H8C4|VP13A_MOUSE	Q5H8C4	VP13A_MOUSE	Vps13a	Vacuolar protein sorting-associated protein 13A	42776.3	35953.8	31277.9	37944.6	37025.6	36021.8	35555.2	37430.4	0.108083	-0.077592	-0.00122207
tr|B9EJR8|B9EJR8_MOUSE	B9EJR8	B9EJR8_MOUSE	Heatr2	HEAT repeat containing 2	36527.8	47904.4	33118.7	26096.1	38746.6	39614.8	34085.3	44250.1	0.107651	-0.404187	-0.000477628
sp|Q9D8N0|EF1G_MOUSE	Q9D8N0	EF1G_MOUSE	Eef1g	Elongation factor 1-gamma	37781.2	37414.9	47746.6	38193.8	32352.5	37460.6	33287.5	35966.6	0.107161	0.29984	-0.0115987
sp|Q921F4|HNRLL_MOUSE	Q921F4	HNRLL_MOUSE	Hnrnpll	Heterogeneous nuclear ribonucleoprotein L-like	31741.9	34548.5	21793.9	30911.5	30560.3	30988.3	52043.5	74913.3	0.107072	-0.223778	1.04454
sp|O35071|KIF1C_MOUSE	O35071	KIF1C_MOUSE	Kif1c	Kinesin-like protein KIF1C	44403.7	37883.8	35445.4	34330.3	36157.4	40252.8	32536.2	28049.3	0.106909	-0.13104	-0.334791
sp|Q8BLH7|HIRP3_MOUSE	Q8BLH7	HIRP3_MOUSE	Hirip3	HIRA-interacting protein 3	35573.8	33811.7	33991.1	37484.1	31516.2	32918.1	46041.3	45485.6	0.106805	0.149612	0.506367
sp|Q8BRK8|AAPK2_MOUSE	Q8BRK8	AAPK2_MOUSE	Prkaa2	5'-AMP-activated protein kinase catalytic subunit alpha-2	32477.1	37788.3	37744.6	41216.4	37419.3	27835.8	34498.8	44823.2	0.106725	0.27505	0.28163
sp|P52431|DPOD1_MOUSE	P52431	DPOD1_MOUSE	Pold1	DNA polymerase delta catalytic subunit	35612.5	36528	39592	33590.3	30452.5	36552.4	34766.5	56023.3	0.106541	0.127226	0.438262
sp|Q9QUR6|PPCE_MOUSE	Q9QUR6	PPCE_MOUSE	Prep	Prolyl endopeptidase	38063.7	36023.4	35439.2	33015.8	34927.2	33898.2	43715.3	40101.3	0.106282	-0.00778704	0.284294
sp|Q9JKY0|RCD1_MOUSE	Q9JKY0	RCD1_MOUSE	Rqcd1	Cell differentiation protein RCD1 homolog	38959.7	39765.3	40102.3	37443.2	39046.1	34097.3	33424.1	28498.8	0.106095	0.0843164	-0.240254
sp|Q99KG3|RBM10_MOUSE	Q99KG3	RBM10_MOUSE	Rbm10	RNA-binding protein 10	24709.4	22493.3	19639.8	23027.4	23641.3	20217.3	84210	92157.6	0.106011	-0.0397314	2.00765
sp|Q8BNV1|TRM2A_MOUSE	Q8BNV1	TRM2A_MOUSE	Trmt2a	tRNA (uracil-5-)-methyltransferase homolog A	33735.7	27078.9	27698.4	32287.1	29457.3	27061.6	56025.1	64199.8	0.105685	0.0858828	1.08893
sp|P14211|CALR_MOUSE	P14211	CALR_MOUSE	Calr	Calreticulin	45101	36405	48807.3	31827.9	37190.4	38568.4	32588.6	24627.1	0.105493	0.0899951	-0.405001
sp|P18653|KS6A1_MOUSE	P18653	KS6A1_MOUSE	Rps6ka1	Ribosomal protein S6 kinase alpha-1	41239.8	37361.1	34481.5	32992.3	38558.2	34508.4	37787.1	35855	0.105334	-0.114885	0.011317
sp|Q8CIM8|INT4_MOUSE	Q8CIM8	INT4_MOUSE	Ints4	Integrator complex subunit 4	34680	33210.7	28194.6	37657.4	28384.9	34728.8	45844.8	54482.4	0.105258	0.0612737	0.668687
sp|Q9JII6|AK1A1_MOUSE	Q9JII6	AK1A1_MOUSE	Akr1a1	Alcohol dehydrogenase [NADP(+)]	41095.7	39152.5	32649.5	37664.6	37133.5	37474.4	34522.1	32023.4	0.10514	-0.0855138	-0.164987
sp|Q8BU04|UBR7_MOUSE	Q8BU04	UBR7_MOUSE	Ubr7	Putative E3 ubiquitin-protein ligase UBR7	41153.5	30714.5	37042.4	25787.9	32070.8	34789.8	43870.7	56188.9	0.104194	-0.0896957	0.581633
sp|O35345|IMA7_MOUSE	O35345	IMA7_MOUSE	Kpna6	Importin subunit alpha-7	42872.1	34963	31237.2	35028.7	37471.5	34950.6	37595.1	42487.4	0.10399	-0.128163	0.145056
sp|P60670|NPL4_MOUSE	P60670	NPL4_MOUSE	Nploc4	Nuclear protein localization protein 4 homolog	34681	38494.8	44303.4	39570	30096.3	37993.9	33991.8	42349.3	0.103918	0.300766	0.165012
sp|Q9QY06|MYO9B_MOUSE	Q9QY06	MYO9B_MOUSE	Myo9b	Unconventional myosin-IXb	38075.9	39606.2	44180.8	32912.7	33095.2	39194.4	33833.7	35078.5	0.103793	0.0928211	-0.0690293
sp|Q3URD3|SLMAP_MOUSE	Q3URD3	SLMAP_MOUSE	Slmap	Sarcolemmal membrane-associated protein	39015.6	38200	40327.8	36163.5	37835.8	34037	35638.5	30385.3	0.103449	0.0898513	-0.122459
sp|Q61102|ABCB7_MOUSE	Q61102	ABCB7_MOUSE	Abcb7	ATP-binding cassette sub-family B member 7, mitochondrial	41797.1	34728.6	35793.1	38032.4	38405.9	32825.9	41603.7	32024.4	0.103423	0.0515973	0.047735
sp|Q9Z1Q9|SYVC_MOUSE	Q9Z1Q9	SYVC_MOUSE	Vars	Valine--tRNA ligase	41082.3	35626.4	36793.2	35303.1	37506	33899.5	36780.3	29929.8	0.103355	0.01389	-0.0981293
sp|Q9D8Y0|EFHD2_MOUSE	Q9D8Y0	EFHD2_MOUSE	Efhd2	EF-hand domain-containing protein D2	38381	39979.1	37892.5	43458.1	38116.1	34828.7	28283.6	31782	0.103314	0.157347	-0.280269
sp|Q8CGC6|RBM28_MOUSE	Q8CGC6	RBM28_MOUSE	Rbm28	RNA-binding protein 28	37255.9	37697.4	31689.9	38702.3	34402	35371.9	36277.3	33449.6	0.103305	0.0127281	-0.000971327
sp|Q7TNC4|LC7L2_MOUSE	Q7TNC4	LC7L2_MOUSE	Luc7l2	Putative RNA-binding protein Luc7-like 2	26599.9	32192.9	28157.6	27355.6	26326.8	28404.7	54606.9	91792.8	0.103267	0.0204575	1.41947
sp|Q9CXE7|TMED5_MOUSE	Q9CXE7	TMED5_MOUSE	Tmed5	Transmembrane emp24 domain-containing protein 5	38980.3	40641.6	39835.5	29845.7	41203.4	32922.8	40507.4	34512.4	0.103182	-0.0892156	0.0172875
sp|P70270|RAD54_MOUSE	P70270	RAD54_MOUSE	Rad54l	DNA repair and recombination protein RAD54-like	32424.4	26954.4	44892.9	23770.6	29960.3	25326.5	57157.2	66002.4	0.103014	0.312609	1.15552
sp|Q9CSN1|SNW1_MOUSE	Q9CSN1	SNW1_MOUSE	Snw1	SNW domain-containing protein 1	26782	21459.1	21928.2	19949.1	22747.9	22190.1	79732	99266.1	0.102327	-0.101769	1.99394
sp|Q9JKF7|RM39_MOUSE	Q9JKF7	RM39_MOUSE	Mrpl39	39S ribosomal protein L39, mitochondrial	18696.6	27202	51159.6	100939	22666.4	20099	19648.3	20819	0.102005	1.83049	-0.0796868
sp|Q3UM29|COG7_MOUSE	Q3UM29	COG7_MOUSE	Cog7	Conserved oligomeric Golgi complex subunit 7	39631.1	39255.9	27040.6	34546.1	39314.1	34189.5	30927.1	36195	0.101972	-0.255198	-0.131028
sp|Q9DCE5|PK1IP_MOUSE	Q9DCE5	PK1IP_MOUSE	Pak1ip1	p21-activated protein kinase-interacting protein 1	37995.6	30502.4	32903.4	30234.3	33533.8	30291.9	49965.5	53425.9	0.101923	-0.0156347	0.695906
sp|P05480|SRC_MOUSE	P05480	SRC_MOUSE	Src	Neuronal proto-oncogene tyrosine-protein kinase Src	38081.9	34916.8	40344.4	35735.6	33446.9	34623	40140.4	42774	0.100856	0.1605	0.284607
sp|O55242|SGMR1_MOUSE	O55242	SGMR1_MOUSE	Sigmar1	Sigma non-opioid intracellular receptor 1	39823	36191.5	37109.8	34586.1	34848.3	36047.6	41052.6	30405	0.100572	0.0161888	0.0113857
sp|Q921H9|SELR1_MOUSE	Q921H9	SELR1_MOUSE	Coa7	Cytochrome c oxidase assembly factor 7	37667.1	45649.1	47451.5	40988.7	36597.3	41116.5	24507.4	24658.9	0.100427	0.186532	-0.660501
sp|O35887|CALU_MOUSE	O35887	CALU_MOUSE	Calu	Calumenin	42966.5	45994.6	33898	24284.3	43614.7	39433.9	31482.5	32267.7	0.0992198	-0.513374	-0.381527
sp|Q91Z67|SRGP2_MOUSE	Q91Z67	SRGP2_MOUSE	Srgap2	SLIT-ROBO Rho GTPase-activating protein 2	47532.7	31719.8	36808.5	36527.6	43868.9	30127.2	34202.5	26501.3	0.0990069	-0.0129262	-0.285664
sp|P63085|MK01_MOUSE	P63085	MK01_MOUSE	Mapk1	Mitogen-activated protein kinase 1	36442.3	36212.9	43417.9	36142.2	33357.4	34495.1	38151.5	38986.4	0.0986634	0.229644	0.185037
sp|P28660|NCKP1_MOUSE	P28660	NCKP1_MOUSE	Nckap1	Nck-associated protein 1	40892.2	36892.9	37494.4	35104.5	35972.6	36715.7	35219.9	33671.5	0.0977709	-0.00177626	-0.0773982
sp|Q3UQ84|SYTM_MOUSE	Q3UQ84	SYTM_MOUSE	Tars2	Threonine--tRNA ligase, mitochondrial	34344.5	43088.1	30619.3	40635.7	33601.2	38765.7	30602.2	44920.6	0.0976112	-0.0223384	0.0615823
sp|Q9ER69|FL2D_MOUSE	Q9ER69	FL2D_MOUSE	Wtap	Pre-mRNA-splicing regulator WTAP	21322.5	20463	26954.9	20036.6	20680.6	18375.6	83039.9	104543	0.0974512	0.266851	2.2639
sp|Q8BWY3|ERF1_MOUSE	Q8BWY3	ERF1_MOUSE	Etf1	Eukaryotic peptide chain release factor subunit 1	42190	36934.3	36880.5	32605.2	38243.9	35722.8	35659.9	34730.5	0.0972462	-0.09016	-0.0714959
sp|Q9CRT8|XPOT_MOUSE	Q9CRT8	XPOT_MOUSE	Xpot	Exportin-T	38351.1	23711.3	38667	28836.7	25751.7	32277.7	57692.6	61480.2	0.0969368	0.218184	1.0382
sp|Q5SUR0|PUR4_MOUSE	Q5SUR0	PUR4_MOUSE	Pfas	Phosphoribosylformylglycinamidine synthase	37291.3	41825.4	23500.4	26635.9	45794.1	28183.3	39343.5	43403.2	0.0968969	-0.561229	0.161616
sp|Q8BYH3|TRM13_MOUSE	Q8BYH3	TRM13_MOUSE	Trmt13	tRNA:m(4)X modification enzyme TRM13 homolog	37856.8	33158.5	46354.4	38672.7	36264.9	30151.1	32881.6	42790.7	0.0965993	0.356391	0.188233
sp|P61161|ARP2_MOUSE	P61161	ARP2_MOUSE	Actr2	Actin-related protein 2	39385.5	40147.5	37439.8	36653.1	34790.1	39633.1	31984.1	31244.1	0.0958024	-0.00641617	-0.235184
sp|P51859|HDGF_MOUSE	P51859	HDGF_MOUSE	Hdgf	Hepatoma-derived growth factor	35096.6	45847.6	34637.5	31557.2	35771.6	39985.6	32472.6	37611.8	0.0955446	-0.194667	-0.11229
sp|P30416|FKBP4_MOUSE	P30416	FKBP4_MOUSE	Fkbp4	Peptidyl-prolyl cis-trans isomerase FKBP4	38590.4	36920.8	35722	35123.9	33937.6	36747.1	36178.3	44326	0.0952936	0.00328753	0.187668
sp|P31230|AIMP1_MOUSE	P31230	AIMP1_MOUSE	Aimp1	Aminoacyl tRNA synthase complex-interacting multifunctional protein 1	43531.1	36099.9	41563.1	34414.7	39617.7	34936.4	33660.7	27111.1	0.0950441	0.0272918	-0.294883
sp|Q9EPL8|IPO7_MOUSE	Q9EPL8	IPO7_MOUSE	Ipo7	Importin-7	39542.7	35988.4	36872.6	39457	34867.9	35847.7	33181.7	37669.6	0.0950414	0.110211	0.00276477
sp|Q6NV83|SR140_MOUSE	Q6NV83	SR140_MOUSE	U2surp	U2 snRNP-associated SURP motif-containing protein	23808.9	21914.7	21737.9	20472.7	22761.3	20056.8	78285.6	106500	0.0947175	-0.0206162	2.10956
sp|Q05186|RCN1_MOUSE	Q05186	RCN1_MOUSE	Rcn1	Reticulocalbin-1	35144	41122.5	53240.3	37352.1	36137.6	35312.2	28401.9	30936.4	0.0941211	0.34246	-0.267964
sp|Q3UFY8|MRRP1_MOUSE	Q3UFY8	MRRP1_MOUSE	Trmt10c	Mitochondrial ribonuclease P protein 1	36728	40048.5	39971.4	42686.3	31931.8	39996.6	32676.2	34758.6	0.0941044	0.200587	-0.0930672
sp|Q8VDD8|WASH1_MOUSE	Q8VDD8	WASH1_MOUSE	Wash1	WAS protein family homolog 1	44375	36885.8	31210.9	28270.8	43603.8	32530.2	35930.5	37060.5	0.0940194	-0.356095	-0.0608201
sp|Q6A4J8|UBP7_MOUSE	Q6A4J8	UBP7_MOUSE	Usp7	Ubiquitin carboxyl-terminal hydrolase 7	32824.3	36685.8	30099	33057.2	30271.6	34854.8	43874.3	61454.2	0.0939803	-0.0443179	0.693581
sp|P50247|SAHH_MOUSE	P50247	SAHH_MOUSE	Ahcy	Adenosylhomocysteinase	30933.7	35728.6	25979.9	32036.1	30303.9	32154.4	47225.3	62556.9	0.0939787	-0.106445	0.813678
sp|Q64704|STX3_MOUSE	Q64704	STX3_MOUSE	Stx3	Syntaxin-3	52111.4	40862.7	24409	26593.6	46384	40731	38607.6	18926.9	0.0939094	-0.772349	-0.598492
sp|Q99LE6|ABCF2_MOUSE	Q99LE6	ABCF2_MOUSE	Abcf2	ATP-binding cassette sub-family F member 2	33611.1	45175.5	34154.7	36633	33920	39906.5	31117.1	40104.2	0.0938095	-0.0606415	-0.0518319
sp|Q99J36|THUM1_MOUSE	Q99J36	THUM1_MOUSE	Thumpd1	THUMP domain-containing protein 1	33420.8	38852.9	52761.4	27777.4	27735.7	40002.3	41772.4	46505.1	0.093504	0.249716	0.382079
sp|Q9R0E2|PLOD1_MOUSE	Q9R0E2	PLOD1_MOUSE	Plod1	Procollagen-lysine,2-oxoglutarate 5-dioxygenase 1	38377.3	40026	60809.8	32808.4	35721.8	37763.2	36379	27041.7	0.0934643	0.349337	-0.212496
sp|Q9D0F4|NKAP_MOUSE	Q9D0F4	NKAP_MOUSE	Nkap	NF-kappa-B-activating protein	35392.5	34461.6	32717	37620.9	31239.1	34242.1	36902.4	45654.3	0.0932629	0.10322	0.334303
sp|Q8VBX6|MPDZ_MOUSE	Q8VBX6	MPDZ_MOUSE	Mpdz	Multiple PDZ domain protein	48420.1	29162.6	40787	35498.6	32573.4	40153.5	39469.7	31686.6	0.0932463	0.0689218	-0.0314977
sp|Q99LM2|CK5P3_MOUSE	Q99LM2	CK5P3_MOUSE	Cdk5rap3	CDK5 regulatory subunit-associated protein 3	34625.1	41484.6	34632.7	39923.4	34692.5	36663	30583.2	44567	0.0930541	0.0633006	0.0747501
sp|Q6P2L6|NSD3_MOUSE	Q6P2L6	NSD3_MOUSE	Whsc1l1	Histone-lysine N-methyltransferase NSD3	38545.6	35644	39754.6	32778.7	38414.9	31141.9	39929.7	39850.5	0.0930258	0.0604529	0.19784
sp|Q7TMQ7|WDR91_MOUSE	Q7TMQ7	WDR91_MOUSE	Wdr91	WD repeat-containing protein 91	39219.1	38115	35099.9	37266.5	39724.4	32781.5	40154.7	31434.7	0.0930068	-0.00277856	-0.0183507
sp|Q9EPU4|CPSF1_MOUSE	Q9EPU4	CPSF1_MOUSE	Cpsf1	Cleavage and polyadenylation specificity factor subunit 1	31304	30474.5	36122.8	33062.4	27751.4	30178.2	53970.5	64964.3	0.0928038	0.256164	1.0378
sp|Q9R1P4|PSA1_MOUSE	Q9R1P4	PSA1_MOUSE	Psma1	Proteasome subunit alpha type-1	42209.2	34617	35855.8	39484.2	32423.4	39619.5	29660.7	31111.9	0.0927443	0.0645602	-0.245434
sp|Q6A026|PDS5A_MOUSE	Q6A026	PDS5A_MOUSE	Pds5a	Sister chromatid cohesion protein PDS5 homolog A	33154.3	35615.1	29461.4	38107	32804.7	31684.9	42191.5	48435.4	0.0926994	0.0672817	0.490873
sp|P62737|ACTA_MOUSE	P62737	ACTA_MOUSE	Acta2	Actin, aortic smooth muscle	36321.4	42051	37674	39780.5	34156.5	39349.2	28985.8	30561.9	0.0924875	0.0754915	-0.303812
sp|O54734|OST48_MOUSE	O54734	OST48_MOUSE	Ddost	Dolichyl-diphosphooligosaccharide--protein glycosyltransferase 48 kDa subunit	35674	35672.7	38352.5	38378.3	32645	34280.5	36675.6	42371.7	0.0922893	0.197248	0.240159
sp|Q9CWG8|NDUF7_MOUSE	Q9CWG8	NDUF7_MOUSE	Ndufaf7	NADH dehydrogenase [ubiquinone] complex I, assembly factor 7	36929.5	36348.8	28851.3	41941.6	36577.5	32160.4	32459.9	44406.3	0.0922799	0.0424989	0.161244
sp|P19253|RL13A_MOUSE	P19253	RL13A_MOUSE	Rpl13a	60S ribosomal protein L13a	38191.9	40464.3	39041.4	32647.4	38030.8	35770.4	33329.9	33857.8	0.0919142	-0.041899	-0.135447
sp|Q3UJD6|UBP19_MOUSE	Q3UJD6	UBP19_MOUSE	Usp19	Ubiquitin carboxyl-terminal hydrolase 19	36017.5	38834.5	40205	33701.7	30533.2	39719.4	38306	42519.8	0.0914879	0.0731532	0.202264
sp|Q9CX56|PSMD8_MOUSE	Q9CX56	PSMD8_MOUSE	Psmd8	26S proteasome non-ATPase regulatory subunit 8	51354.3	22303.9	47965.4	31883.7	36833	32316.7	46072.1	25926.7	0.091126	0.207554	0.058251
sp|Q8C0D5|ETUD1_MOUSE	Q8C0D5	ETUD1_MOUSE	Eftud1	Elongation factor Tu GTP-binding domain-containing protein 1	33954.8	43242.6	45124.8	36166.2	35081	37391.9	34491.1	34163.9	0.0911108	0.165656	-0.0780747
sp|P18826|KPB1_MOUSE	P18826	KPB1_MOUSE	Phka1	Phosphorylase b kinase regulatory subunit alpha, skeletal muscle isoform	36721.4	36984.3	36413.2	40750.5	35690.2	33516.1	36026.1	28219	0.0908728	0.157019	-0.107317
sp|Q9EP69|SAC1_MOUSE	Q9EP69	SAC1_MOUSE	Sacm1l	Phosphatidylinositide phosphatase SAC1	41776.8	40106.6	28733.8	38802	40562.7	36324.1	29735.8	28489.9	0.0908364	-0.187085	-0.401079
sp|Q6DIC0|SMCA2_MOUSE	Q6DIC0	SMCA2_MOUSE	Smarca2	Probable global transcription activator SNF2L2	39051.8	36004	32224.3	34823.7	34917.7	35560	37735.5	42773.4	0.0907972	-0.0719704	0.191981
sp|Q99L48|NMD3_MOUSE	Q99L48	NMD3_MOUSE	Nmd3	60S ribosomal export protein NMD3	42706.4	32393.6	33687.4	36216.9	36003.4	34539.7	40514.2	36627.6	0.0903087	-0.0131236	0.129008
sp|Q6ZQ08|CNOT1_MOUSE	Q6ZQ08	CNOT1_MOUSE	Cnot1	CCR4-NOT transcription complex subunit 1	36482.1	39753.9	40562.8	36719.3	34954.8	36657.4	31811	38301.1	0.0902677	0.109929	-0.030542
sp|Q9ESK4|ING2_MOUSE	Q9ESK4	ING2_MOUSE	Ing2	Inhibitor of growth protein 2	32922.8	31516.4	33892.3	35152.7	30314.4	30218.8	43255.7	59917.4	0.0902117	0.189811	0.769268
sp|Q8BPM2|M4K5_MOUSE	Q8BPM2	M4K5_MOUSE	Map4k5	Mitogen-activated protein kinase kinase kinase kinase 5	41220.9	34989	35445	32725.6	39633.3	31969.9	40493.7	38897.3	0.0899537	-0.0708747	0.148951
sp|Q9WV34|MPP2_MOUSE	Q9WV34	MPP2_MOUSE	Mpp2	MAGUK p55 subfamily member 2	41833.6	35306.5	41970.7	42513.1	34314.6	38164.4	35356.5	34486.9	0.0899161	0.221111	-0.053439
sp|Q9QXK7|CPSF3_MOUSE	Q9QXK7	CPSF3_MOUSE	Cpsf3	Cleavage and polyadenylation specificity factor subunit 3	29616.9	26862	29679.8	29375.7	27721.2	25359.1	54287.9	80722.8	0.0895352	0.153895	1.34683
sp|Q9WUD1|CHIP_MOUSE	Q9WUD1	CHIP_MOUSE	Stub1	STIP1 homology and U box-containing protein 1	40027.5	36346.9	41667.9	36342	39557.1	32282.2	35701.2	29846.4	0.0883151	0.118884	-0.13223
sp|P35282|RAB21_MOUSE	P35282	RAB21_MOUSE	Rab21	Ras-related protein Rab-21	41830.2	42129.9	33763.7	40904.4	38489.5	40490.1	29904	26596.1	0.0882236	-0.0809882	-0.483227
sp|Q9JLB0|MPP6_MOUSE	Q9JLB0	MPP6_MOUSE	Mpp6	MAGUK p55 subfamily member 6	35661.2	40727.6	30428.1	40710	34849.3	37037.5	32801.5	39565.5	0.0876357	-0.0151023	0.00960656
sp|Q923D5|WBP11_MOUSE	Q923D5	WBP11_MOUSE	Wbp11	WW domain-binding protein 11	30458.4	35297.7	23156.2	29897.2	22340.7	39546.1	57902.1	58291.3	0.0874952	-0.222186	0.908825
sp|Q1HFZ0|NSUN2_MOUSE	Q1HFZ0	NSUN2_MOUSE	Nsun2	tRNA (cytosine(34)-C(5))-methyltransferase	39741.3	30547.7	41252.1	33326.9	35765.7	30387.4	43271.6	42159.7	0.0874919	0.172962	0.368955
sp|P11499|HS90B_MOUSE	P11499	HS90B_MOUSE	Hsp90ab1	Heat shock protein HSP 90-beta	38750.8	38551.6	37600	37586.1	35147.1	37609	29735.3	38909.8	0.0874452	0.0473985	-0.0839117
sp|Q99MI1|RB6I2_MOUSE	Q99MI1	RB6I2_MOUSE	Erc1	ELKS/Rab6-interacting/CAST family member 1	43200.3	34137	32272.1	37220.8	37104.8	35684.6	38272.4	36001.5	0.0874371	-0.0668631	0.0291257
sp|Q3THS6|METK2_MOUSE	Q3THS6	METK2_MOUSE	Mat2a	S-adenosylmethionine synthase isoform type-2	34869.2	39465.5	34454.8	41404.1	30597.3	39373.7	31657.9	41552.2	0.0872793	0.11656	0.065285
sp|Q8BJ37|TYDP1_MOUSE	Q8BJ37	TYDP1_MOUSE	Tdp1	Tyrosyl-DNA phosphodiesterase 1	38129.9	35736.4	36772.5	27311.8	36125.5	33412.3	41087.1	52638.1	0.0871182	-0.117827	0.430638
sp|Q99NG0|ARIP4_MOUSE	Q99NG0	ARIP4_MOUSE	Rad54l2	Helicase ARIP4	43444.5	28073.8	46006.9	37280.1	34250	33109.7	44201.3	32280.4	0.0864266	0.306206	0.183229
sp|Q7TT50|MRCKB_MOUSE	Q7TT50	MRCKB_MOUSE	Cdc42bpb	Serine/threonine-protein kinase MRCK beta	38081.8	40379.5	32838.9	35890.3	36227	37706.8	32592.3	37732.7	0.0857489	-0.10531	-0.0721961
sp|P39749|FEN1_MOUSE	P39749	FEN1_MOUSE	Fen1	Flap endonuclease 1	34519.8	34689.2	38698.2	36556.3	34172.6	31050.1	40631.3	41799.6	0.0855858	0.206404	0.337811
sp|P47856|GFPT1_MOUSE	P47856	GFPT1_MOUSE	Gfpt1	Glutamine--fructose-6-phosphate aminotransferase [isomerizing] 1	45314.2	31915.8	47973.5	32001.9	40391.8	32407.4	36956.6	26607.3	0.0852388	0.135633	-0.195716
sp|Q6PGF7|EXOC8_MOUSE	Q6PGF7	EXOC8_MOUSE	Exoc8	Exocyst complex component 8	46052.6	36622.4	30846.6	34027.9	40108.9	37868.3	28390.9	32326	0.0843997	-0.2654	-0.360954
sp|Q8K2P7|S38A1_MOUSE	Q8K2P7	S38A1_MOUSE	Slc38a1	Sodium-coupled neutral amino acid transporter 1	36359.2	40594.4	36448.2	32586.5	41631.7	30986.3	38197.9	29589	0.0836605	-0.0730076	-0.0993226
sp|Q9CWZ3|RBM8A_MOUSE	Q9CWZ3	RBM8A_MOUSE	Rbm8a	RNA-binding protein 8A	27903.4	32871.2	21343	34312.6	25965.3	31399.2	46654.2	77494.2	0.0833121	-0.0436292	1.11384
sp|Q6PEV3|WIPF2_MOUSE	Q6PEV3	WIPF2_MOUSE	Wipf2	WAS/WASL-interacting protein family member 2	37811.2	37929.7	45443	38410.6	34991.4	36507.5	34056.1	39335	0.0831499	0.22995	0.0376834
sp|Q8BJ71|NUP93_MOUSE	Q8BJ71	NUP93_MOUSE	Nup93	Nuclear pore complex protein Nup93	49580.3	33601.2	37615.8	26601.2	42541.9	35990.5	36320.9	33458.7	0.0829746	-0.290335	-0.170482
sp|Q99JI6|RAP1B_MOUSE	Q99JI6	RAP1B_MOUSE	Rap1b	Ras-related protein Rap-1b	46579.3	43316.4	27514.9	23513.2	46921.7	37959.8	38436.2	26881.3	0.0828019	-0.734157	-0.37798
sp|Q9CWF2|TBB2B_MOUSE	Q9CWF2	TBB2B_MOUSE	Tubb2b	Tubulin beta-2B chain	33076.1	43184.8	35485.9	38757.5	34012.1	37998.6	36496.1	39180	0.0827308	0.0440522	0.0716271
sp|Q61081|CDC37_MOUSE	Q61081	CDC37_MOUSE	Cdc37	Hsp90 co-chaperone Cdc37	42691.8	39408.5	33696.1	30411.5	38998.1	38533.4	33978.5	30761.5	0.0826047	-0.274289	-0.260125
sp|P08249|MDHM_MOUSE	P08249	MDHM_MOUSE	Mdh2	Malate dehydrogenase, mitochondrial	41375.4	35704.2	39419.5	37703.6	36423.1	36380.3	36835.9	34540.3	0.0823437	0.0831562	-0.0285648
sp|Q78JE5|FBX22_MOUSE	Q78JE5	FBX22_MOUSE	Fbxo22	F-box only protein 22	36487.6	35395.8	37808.8	36687.4	32313.1	35600.3	37030.1	42610.2	0.0819618	0.13347	0.229803
sp|P61620|S61A1_MOUSE	P61620	S61A1_MOUSE	Sec61a1	Protein transport protein Sec61 subunit alpha isoform 1	44444.5	36412.8	34723.8	29935.4	42561.1	33862.5	34364.4	36108.8	0.0813603	-0.241162	-0.116943
sp|P47753|CAZA1_MOUSE	P47753	CAZA1_MOUSE	Capza1	F-actin-capping protein subunit alpha-1	38964.2	32395	38247.2	36209.7	35487.7	31960.9	35009.5	42967.1	0.0813116	0.142618	0.209254
sp|Q8CIW5|PEO1_MOUSE	Q8CIW5	PEO1_MOUSE	Peo1	Twinkle protein, mitochondrial	38082.9	35013.7	37704.1	38338.3	32754.7	36356.4	42483.2	44946.8	0.0808858	0.137885	0.33921
sp|Q9WV02|RBMX_MOUSE	Q9WV02	RBMX_MOUSE	Rbmx	RNA-binding motif protein, X chromosome	28301.9	25456.2	20888.4	29935.8	23089.8	27746.4	66965	85054	0.0806257	-0.000340667	1.58032
sp|P49586|PCY1A_MOUSE	P49586	PCY1A_MOUSE	Pcyt1a	Choline-phosphate cytidylyltransferase A	39631.6	32497.6	35138.3	33745.4	35404.2	32807.2	46112.4	37134.7	0.0805699	0.0141475	0.287386
sp|Q68FD5|CLH1_MOUSE	Q68FD5	CLH1_MOUSE	Cltc	Clathrin heavy chain 1	37743.4	41449.3	35827.7	34286.1	37139.3	37759	33098.1	35266.4	0.0804346	-0.0952354	-0.131686
sp|Q9DAW9|CNN3_MOUSE	Q9DAW9	CNN3_MOUSE	Cnn3	Calponin-3	42678	32864.2	32417	30200.6	40818.8	30638.5	46602	39270.3	0.0802013	-0.190514	0.26511
sp|Q6PB44|PTN23_MOUSE	Q6PB44	PTN23_MOUSE	Ptpn23	Tyrosine-protein phosphatase non-receptor type 23	32207.1	44621.9	34598.7	42055.7	29956.4	42722.3	27434.7	35849.7	0.0801174	0.0768364	-0.199683
sp|Q8R1X6|SPG20_MOUSE	Q8R1X6	SPG20_MOUSE	Spg20	Spartin	38158.7	31578	42414	30402.2	39971.1	26001.1	45936.8	38728.5	0.0800575	0.142402	0.359912
sp|Q8VDT9|RM50_MOUSE	Q8VDT9	RM50_MOUSE	Mrpl50	39S ribosomal protein L50, mitochondrial	8380.23	16629.5	53039.3	147020	12174.7	11494.4	11345.3	12793.1	0.0794833	3.07935	0.0283222
sp|P62911|RL32_MOUSE	P62911	RL32_MOUSE	Rpl32	60S ribosomal protein L32	42404.5	36357.2	41289	38492.7	36122.3	38417.8	32882.3	22540	0.0794787	0.0980407	-0.427552
sp|Q6P9R2|OXSR1_MOUSE	Q6P9R2	OXSR1_MOUSE	Oxsr1	Serine/threonine-protein kinase OSR1	40438.3	41651.5	34540.2	35528.6	37700.7	39994.5	34362	26704.3	0.0793778	-0.149055	-0.347449
sp|Q9ET54|PALLD_MOUSE	Q9ET54	PALLD_MOUSE	Palld	Palladin	43007.2	33975.9	48217.3	29256.4	36892.8	35993.5	36492.1	38791	0.0788935	0.0880581	0.0466781
sp|Q9CQA5|MED4_MOUSE	Q9CQA5	MED4_MOUSE	Med4	Mediator of RNA polymerase II transcription subunit 4	43310.1	27475.6	32504.3	29519.4	39765.1	27286.6	52088.6	39046.5	0.0781842	-0.112455	0.442732
sp|O70492|SNX3_MOUSE	O70492	SNX3_MOUSE	Snx3	Sorting nexin-3	35228.9	43562.8	36445.8	35001.4	37346.2	37290.4	29702	35545.6	0.0781611	-0.0630061	-0.193959
sp|Q61941|NNTM_MOUSE	Q61941	NNTM_MOUSE	Nnt	NAD(P) transhydrogenase, mitochondrial	39636.2	39102.2	38852.2	38787.1	37013.2	37622.8	34050.3	33775.2	0.0771959	0.056915	-0.138043
sp|Q3TL44|NLRX1_MOUSE	Q3TL44	NLRX1_MOUSE	Nlrx1	NLR family member X1	34832.7	45808.6	35683.3	37920.2	36591	39848.9	33048.4	25882.5	0.0771925	-0.0545518	-0.375301
sp|O55126|NIPS2_MOUSE	O55126	NIPS2_MOUSE	Gbas	Protein NipSnap homolog 2	39383.8	35802.1	38615.6	38762.1	35823.2	35453.1	33290.2	33233.5	0.0770404	0.118495	-0.0995553
sp|Q7TNV0|DEK_MOUSE	Q7TNV0	DEK_MOUSE	Dek	Protein DEK	35509.2	39504.5	39602.3	38375.5	34158.6	37015.3	35616.8	36748.7	0.0758058	0.131716	0.0239535
sp|Q80X95|RRAGA_MOUSE	Q80X95	RRAGA_MOUSE	Rraga	Ras-related GTP-binding protein A	39666.1	32358.2	54796.9	38128.5	36311.7	32026.7	34238.3	37643.4	0.0757851	0.443374	0.0729261
sp|Q08093|CNN2_MOUSE	Q08093	CNN2_MOUSE	Cnn2	Calponin-2	41307.2	35905.7	37733.8	35586.8	39251.3	34020.1	36895.5	28314.4	0.0755916	0.000967435	-0.16816
sp|Q6A0A9|F120A_MOUSE	Q6A0A9	F120A_MOUSE	FAM120A	Constitutive coactivator of PPAR-gamma-like protein 1	37290.1	37220.5	32040.4	37139.3	37030.6	33679.9	35156.8	31376.1	0.0755222	-0.0315767	-0.0878577
sp|Q9CWV1|MCM8_MOUSE	Q9CWV1	MCM8_MOUSE	Mcm8	DNA helicase MCM8	37855	31305.3	41865.9	38995.7	30875.2	34774.1	38311.4	45827.8	0.0751631	0.300674	0.357997
sp|Q8BTI8|SRRM2_MOUSE	Q8BTI8	SRRM2_MOUSE	Srrm2	Serine/arginine repetitive matrix protein 2	20352.2	20270.4	23203.5	18411.9	19935.3	18636.4	76680.6	126385	0.074741	0.109577	2.39634
tr|Q80ZX0|Q80ZX0_MOUSE	Q80ZX0	Q80ZX0_MOUSE	Sec24b	Protein Sec24b	41312	31343.8	30474.2	37916	34573.9	34418.6	39170.3	38737.4	0.0746389	-0.0126493	0.175328
sp|O88844|IDHC_MOUSE	O88844	IDHC_MOUSE	Idh1	Isocitrate dehydrogenase [NADP] cytoplasmic	39103.6	37219.2	41140	33926.8	36550.8	35951.6	33105.9	33861.1	0.0740843	0.0501469	-0.114579
sp|Q61584|FXR1_MOUSE	Q61584	FXR1_MOUSE	Fxr1	Fragile X mental retardation syndrome-related protein 1	38146.4	37094	31124.3	33623.7	36119.7	35368.5	37303.6	40749.4	0.073803	-0.142869	0.126749
sp|O35654|DPOD2_MOUSE	O35654	DPOD2_MOUSE	Pold2	DNA polymerase delta subunit 2	33514.8	34519.6	29389.7	37573.9	38493.2	26155	42064.2	47472.9	0.0736548	0.050769	0.469875
sp|Q9JJ80|RPF2_MOUSE	Q9JJ80	RPF2_MOUSE	Rpf2	Ribosome production factor 2 homolog	50732	28260	42113.7	34321.8	39323.4	35747.3	40817.1	16605.7	0.0734571	0.0259917	-0.386627
sp|P23591|FCL_MOUSE	P23591	FCL_MOUSE	Tsta3	GDP-L-fucose synthase	42232.3	31793.1	40016.7	39698.7	36089.3	34279.7	39593.3	23037	0.0730813	0.179918	-0.168081
sp|Q9D8N2|FA45A_MOUSE	Q9D8N2	FA45A_MOUSE	Fam45a	Protein FAM45A	35299.9	39236.9	33874.5	35656.5	34480	36376.2	36976.9	44926.9	0.07306	-0.0272361	0.209038
sp|Q9CZ62|CEP97_MOUSE	Q9CZ62	CEP97_MOUSE	Cep97	Centrosomal protein of 97 kDa	40674	37313.2	39540	29688.5	41211.8	32925.3	41602.3	31289	0.0730407	-0.0988305	-0.024451
sp|Q8VEK3|HNRPU_MOUSE	Q8VEK3	HNRPU_MOUSE	Hnrnpu	Heterogeneous nuclear ribonucleoprotein U	26535.6	25303.1	24566.6	22620.9	26004.3	23276.6	68189.9	89563.1	0.072996	-0.0626255	1.67856
sp|P63158|HMGB1_MOUSE	P63158	HMGB1_MOUSE	Hmgb1	High mobility group protein B1	39963.5	34580.4	32531.9	32051.6	38049.5	32822.2	40745.5	42435.2	0.0728792	-0.134045	0.231038
sp|Q8K012|FBP1L_MOUSE	Q8K012	FBP1L_MOUSE	Fnbp1l	Formin-binding protein 1-like	39103.7	35887.4	31880.7	36383.5	36556.2	34740.8	33627	33291.3	0.072877	-0.0627139	-0.0914428
sp|Q8BNU0|ARMC6_MOUSE	Q8BNU0	ARMC6_MOUSE	Armc6	Armadillo repeat-containing protein 6	37219.1	39230.2	47571.7	40220.9	28175.2	44513.6	33437.4	38945.3	0.072768	0.272366	-0.0060903
sp|Q9DBH5|LMAN2_MOUSE	Q9DBH5	LMAN2_MOUSE	Lman2	Vesicular integral-membrane protein VIP36	40250.6	38790.2	33559.7	39628.7	37605.9	37548.7	29405.9	25432.6	0.0727371	-0.0382459	-0.454672
sp|Q9JJU8|SH3L1_MOUSE	Q9JJU8	SH3L1_MOUSE	Sh3bgrl	SH3 domain-binding glutamic acid-rich-like protein	38427.1	34239.3	44531	41304.1	37014.1	32081.6	36114.2	33958.8	0.0726955	0.312973	0.0202635
sp|P17710|HXK1_MOUSE	P17710	HXK1_MOUSE	Hk1	Hexokinase-1	37470.6	38156.1	44016.5	35731.5	34277.9	37633.9	33240.4	34569.2	0.0726686	0.149221	-0.084738
sp|P50431|GLYC_MOUSE	P50431	GLYC_MOUSE	Shmt1	Serine hydroxymethyltransferase, cytosolic	43933.6	27337.2	41011.2	41042.4	30350.1	37432.1	36847.9	41749.6	0.0724045	0.275661	0.213577
sp|Q8BVE3|VATH_MOUSE	Q8BVE3	VATH_MOUSE	Atp6v1h	V-type proton ATPase subunit H	35716	41189.2	40366.4	37065.2	36899.8	36247.5	30509.1	32568.5	0.0722767	0.0821176	-0.213678
sp|Q9QZQ8|H2AY_MOUSE	Q9QZQ8	H2AY_MOUSE	H2afy	Core histone macro-H2A.1	43887.2	34912.1	37070.9	39077.6	36683.5	38298.7	35476.2	25603.2	0.0716328	0.0222673	-0.295864
sp|A2AWL7|MGAP_MOUSE	A2AWL7	MGAP_MOUSE	Mga	MAX gene-associated protein	38676	34493.8	33455	42028.3	32406.3	37238.6	39088.4	35701.8	0.0712313	0.116142	0.102834
sp|Q9JM52|MINK1_MOUSE	Q9JM52	MINK1_MOUSE	Mink1	Misshapen-like kinase 1	42494.7	30706.2	28011.5	38419.5	35934.3	33740.4	39683.3	37683	0.0712253	-0.0687782	0.151072
tr|Q3UJB0|Q3UJB0_MOUSE	Q3UJB0	Q3UJB0_MOUSE	Sf3b2	Protein Sf3b2	20894	21578.3	25951.8	18537.4	21177.5	19255.3	72601.9	121820	0.070997	0.137927	2.26559
tr|Q3ULB1|Q3ULB1_MOUSE	Q3ULB1	Q3ULB1_MOUSE	Tes	Testin	39758.9	36522.6	37334.2	43971.7	36037.1	36584.5	30927.6	30430.3	0.0709351	0.162963	-0.243149
sp|Q9QYS9|QKI_MOUSE	Q9QYS9	QKI_MOUSE	Qki	Protein quaking	43448.8	29525.9	32985.4	39208.4	36198.8	33284.6	38474.4	36472.8	0.0707266	0.055206	0.109206
sp|P35979|RL12_MOUSE	P35979	RL12_MOUSE	Rpl12	60S ribosomal protein L12	37188.8	37095	32712.6	38499.5	33163.3	37586.6	34565.9	42271.6	0.0703186	0.00939431	0.119081
sp|O70348|DXO_MOUSE	O70348	DXO_MOUSE	Dxo	Decapping and exoribonuclease protein	33706.3	29860.8	26541.9	33112.1	27458.3	33085.2	37747.7	78051.6	0.0703103	-0.0213543	0.935583
tr|Q0VBL3|Q0VBL3_MOUSE	Q0VBL3	Q0VBL3_MOUSE	Rbm15	Protein Rbm15	26494.4	32401.8	26005.2	30370.6	27866.9	28229.6	59951.5	64688.7	0.0702664	0.00716668	1.15179
sp|Q9DBC7|KAP0_MOUSE	Q9DBC7	KAP0_MOUSE	Prkar1a	cAMP-dependent protein kinase type I-alpha regulatory subunit	42859.3	36251.1	45378.2	32473.4	37447.5	37903.1	33763	29453.5	0.0702476	0.0471057	-0.253318
sp|Q62083|PICK1_MOUSE	Q62083	PICK1_MOUSE	Pick1	PRKCA-binding protein	42109.6	33571.1	37275.7	40403.9	35416.4	36668.3	32202.9	29094	0.0702329	0.107842	-0.23388
sp|Q62148|AL1A2_MOUSE	Q62148	AL1A2_MOUSE	Aldh1a2	Retinal dehydrogenase 2	37838.5	32223.2	47688.2	35283	37552.7	29182.1	48099.7	35145.5	0.0701861	0.314171	0.318928
sp|Q07832|PLK1_MOUSE	Q07832	PLK1_MOUSE	Plk1	Serine/threonine-protein kinase PLK1	33029	31984.6	30748.7	30270.8	30518.8	31441.8	49726.5	60840	0.0693903	-0.0220776	0.835493
sp|Q99LG4|TTC5_MOUSE	Q99LG4	TTC5_MOUSE	Ttc5	Tetratricopeptide repeat protein 5	38080.8	34149.2	39344.4	33371.6	35763.5	33081.1	48539.1	36848.5	0.0692512	0.0789286	0.310681
sp|P80314|TCPB_MOUSE	P80314	TCPB_MOUSE	Cct2	T-complex protein 1 subunit beta	40424.8	37264.9	30761.4	33459.4	39311.8	34744.3	40171.5	35479.1	0.0691036	-0.205578	0.0307329
sp|Q9Z0R4|ITSN1_MOUSE	Q9Z0R4	ITSN1_MOUSE	Itsn1	Intersectin-1	36198.3	38414.4	50428.7	40088	34596.4	36531.9	29505.2	30760.2	0.0689959	0.34776	-0.239096
sp|P02469|LAMB1_MOUSE	P02469	LAMB1_MOUSE	Lamb1	Laminin subunit beta-1	38316.1	38819	43698.8	34290.6	36850.2	36701.5	33942.1	33005.7	0.0686288	0.0845194	-0.135721
sp|Q8R409|HEXI1_MOUSE	Q8R409	HEXI1_MOUSE	Hexim1	Protein HEXIM1	33518.9	29030.5	36745.2	35851	28460.9	31191.9	44191.1	69555.1	0.0684059	0.283303	0.931156
sp|Q02053|UBA1_MOUSE	Q02053	UBA1_MOUSE	Uba1	Ubiquitin-like modifier-activating enzyme 1	30219.8	34169.4	31567.3	32914.4	28524.7	32882.6	47107.7	59168.3	0.0684057	0.0704785	0.791331
sp|Q920B9|SP16H_MOUSE	Q920B9	SP16H_MOUSE	Supt16h	FACT complex subunit SPT16	40027.2	33539.4	32670.7	35278.2	35607.3	34559	42336.5	39482.6	0.0682719	-0.0463288	0.221659
sp|Q9R0A5|NEK3_MOUSE	Q9R0A5	NEK3_MOUSE	Nek3	Serine/threonine-protein kinase Nek3	41422	36533.1	36502.5	28103.8	44204.8	30160.2	42096.5	33345.1	0.06802	-0.202949	0.0207364
sp|Q61194|P3C2A_MOUSE	Q61194	P3C2A_MOUSE	Pik3c2a	Phosphatidylinositol 4-phosphate 3-kinase C2 domain-containing subunit alpha	40847.1	39535.4	48380.8	41969.6	33364.2	43376.7	26957.4	23630	0.0668864	0.235535	-0.601216
sp|Q99020|ROAA_MOUSE	Q99020	ROAA_MOUSE	Hnrnpab	Heterogeneous nuclear ribonucleoprotein A/B	25212.4	25657.7	21800.4	24216.7	23505.6	25059.9	62876.1	97602.4	0.0668857	-0.0777617	1.72438
sp|P09405|NUCL_MOUSE	P09405	NUCL_MOUSE	Ncl	Nucleolin	32119	36243.4	30925.8	36084.8	28020.8	37244.6	39125.2	56906.2	0.0668841	0.03807	0.557188
sp|Q9Z2U1|PSA5_MOUSE	Q9Z2U1	PSA5_MOUSE	Psma5	Proteasome subunit alpha type-5	34141.3	38560.3	40423.7	39036.5	33693.9	35719.6	32898.4	38180	0.0667716	0.195017	0.034196
sp|Q61214|DYR1A_MOUSE	Q61214	DYR1A_MOUSE	Dyrk1a	Dual specificity tyrosine-phosphorylation-regulated kinase 1A	36698.3	33766.2	41370.3	36286.3	36036.9	31242.8	39512.4	39157.8	0.0667252	0.206937	0.225645
tr|Q8K1M3|Q8K1M3_MOUSE	Q8K1M3	Q8K1M3_MOUSE	Prkar2a	Protein kinase, cAMP dependent regulatory, type II alpha	39757.6	39021.7	32880.8	40182.5	37439.6	37786.2	30882.7	26261	0.0665898	-0.0420798	-0.39663
sp|P62918|RL8_MOUSE	P62918	RL8_MOUSE	Rpl8	60S ribosomal protein L8	29899.8	51582.4	33113	42738.3	30088.4	47718.6	22517.5	25426.6	0.0665838	-0.0367273	-0.698546
sp|A2AKX3|SETX_MOUSE	A2AKX3	SETX_MOUSE	Setx	Probable helicase senataxin	34260.2	30446.7	37346.4	37867	30941.3	30850.4	41637.6	45963.4	0.0665059	0.283576	0.503535
sp|Q8BVE8|NSD2_MOUSE	Q8BVE8	NSD2_MOUSE	Whsc1	Histone-lysine N-methyltransferase NSD2	39775.7	34819.1	39275.1	35177.7	35506.2	35731.5	36142.9	33396.8	0.0664347	0.0636854	-0.0348041
sp|A2AJK6|CHD7_MOUSE	A2AJK6	CHD7_MOUSE	Chd7	Chromodomain-helicase-DNA-binding protein 7	44238.2	37136.7	30844.5	27020.1	43553.2	34159.7	43973.3	34857.8	0.0664289	-0.425472	0.0206108
sp|P62830|RL23_MOUSE	P62830	RL23_MOUSE	Rpl23	60S ribosomal protein L23	40403.4	36673.3	37546.4	37238.3	34714.4	38895.6	32415.1	32779.4	0.0663923	0.0228413	-0.175152
sp|P47857|K6PF_MOUSE	P47857	K6PF_MOUSE	Pfkm	ATP-dependent 6-phosphofructokinase, muscle type	40036.2	39455.1	38793.1	39011.4	36142.4	39775.4	30001.2	27787.5	0.0663593	0.0354149	-0.393653
sp|P11440|CDK1_MOUSE	P11440	CDK1_MOUSE	Cdk1	Cyclin-dependent kinase 1	36983.7	35067.1	32701	33457.9	33105.4	35723.5	45479.3	40743.9	0.0659992	-0.0570772	0.325062
sp|Q8BMF4|ODP2_MOUSE	Q8BMF4	ODP2_MOUSE	Dlat	Dihydrolipoyllysine-residue acetyltransferase component of pyruvate dehydrogenase complex, mitochondrial	36724.6	42376.9	34193.4	39973.5	34672.3	40911.5	29281.5	33503.5	0.0656288	-0.0273019	-0.267657
sp|Q9R1T4|SEPT6_MOUSE	Q9R1T4	SEPT6_MOUSE	42253	Septin-6	37174.9	38650	45480.8	39917.8	34498.6	37967.9	28511.8	33809.2	0.0653573	0.236898	-0.217596
sp|O88738|BIRC6_MOUSE	O88738	BIRC6_MOUSE	Birc6	Baculoviral IAP repeat-containing protein 6	40510.1	38645.5	39217.2	37560.6	39384.9	36269	32415.1	27983.8	0.065276	0.0212748	-0.324892
sp|Q91Z49|UIF_MOUSE	Q91Z49	UIF_MOUSE	Fyttd1	UAP56-interacting factor	29155.3	23310.5	29105.1	24783.1	26491	23664.1	65417	83266.8	0.0649822	0.103571	1.56778
sp|Q8JZX4|SPF45_MOUSE	Q8JZX4	SPF45_MOUSE	Rbm17	Splicing factor 45	27194.3	32617	22671.4	26592.6	29010.5	28192	58470.6	80345.5	0.064341	-0.215544	1.27903
sp|P14685|PSMD3_MOUSE	P14685	PSMD3_MOUSE	Psmd3	26S proteasome non-ATPase regulatory subunit 3	37608.1	40435.1	30818.9	35524.1	36709	37937.6	32444.6	39599.1	0.0641952	-0.170135	-0.0512064
sp|P80317|TCPZ_MOUSE	P80317	TCPZ_MOUSE	Cct6a	T-complex protein 1 subunit zeta	37893.2	38221.5	35210.3	34334.2	37277.9	35527.7	38309.4	36223.8	0.0641246	-0.0661123	0.0338332
sp|Q3THG9|AASD1_MOUSE	Q3THG9	AASD1_MOUSE	Aarsd1	Alanyl-tRNA editing protein Aarsd1	39614.4	36500.6	32237.8	36960.4	38263.4	34548.9	37071.8	31447.5	0.0639973	-0.0734481	-0.0876726
sp|P51863|VA0D1_MOUSE	P51863	VA0D1_MOUSE	Atp6v0d1	V-type proton ATPase subunit d 1	32245.7	41628	38218.7	43465.9	33512	37219.5	27084.6	43450.4	0.0627092	0.207711	-0.00401336
sp|Q8R010|AIMP2_MOUSE	Q8R010	AIMP2_MOUSE	Aimp2	Aminoacyl tRNA synthase complex-interacting multifunctional protein 2	38212.4	43197.4	35653.4	35613.6	42812.7	35152	32503	22257.2	0.0623829	-0.129584	-0.50969
sp|P62852|RS25_MOUSE	P62852	RS25_MOUSE	Rps25	40S ribosomal protein S25	38609.2	42462.9	37391.4	39806.7	36029.3	41620.8	26155.9	27301.9	0.0622194	-0.00842294	-0.538587
sp|A2A432|CUL4B_MOUSE	A2A432	CUL4B_MOUSE	Cul4b	Cullin-4B	34855.6	32434.3	30597.9	33154.5	30920.9	33554.2	45754.2	56463.1	0.0616474	-0.0162611	0.664826
sp|Q63932|MP2K2_MOUSE	Q63932	MP2K2_MOUSE	Map2k2	Dual specificity mitogen-activated protein kinase kinase 2	42126	36881.2	36124.9	28931.7	44198.7	31507.1	40758.2	28975.3	0.0615787	-0.218708	-0.118552
sp|Q9R020|ZRAB2_MOUSE	Q9R020	ZRAB2_MOUSE	Zranb2	Zinc finger Ran-binding domain-containing protein 2	41165.8	37683.7	25562.9	30717.4	41154.3	34400.6	38460.2	36297.3	0.0615765	-0.424895	-0.0153073
sp|P49717|MCM4_MOUSE	P49717	MCM4_MOUSE	Mcm4	DNA replication licensing factor MCM4	34769.6	37301.5	38645.1	36683.5	33302.2	35773.1	37085.7	39936.8	0.061251	0.125026	0.15711
sp|Q8R418|DICER_MOUSE	Q8R418	DICER_MOUSE	Dicer1	Endoribonuclease Dicer	38558	39490.5	40370.9	38188.5	36687.9	38125.5	30397.5	32305.8	0.0610744	0.0704876	-0.254757
sp|Q3TXT3|SOSSC_MOUSE	Q3TXT3	SOSSC_MOUSE	Inip	SOSS complex subunit C	39968.6	33580.4	38610.8	29349.8	37218.9	33293.9	42513.4	34586.7	0.0608184	-0.0531875	0.128847
sp|Q8CH25|SLTM_MOUSE	Q8CH25	SLTM_MOUSE	Sltm	SAFB-like transcription modulator	19052.3	17481	18707.5	17407.7	17364	17662	87828.7	126156	0.060781	0.0441778	2.61101
sp|P26450|P85A_MOUSE	P26450	P85A_MOUSE	Pik3r1	Phosphatidylinositol 3-kinase regulatory subunit alpha	38434.7	36851	38292.4	34187.8	37447.4	34775.8	40272.4	39426.6	0.059914	0.0051257	0.142101
sp|Q8CGC7|SYEP_MOUSE	Q8CGC7	SYEP_MOUSE	Eprs	Bifunctional glutamate/proline--tRNA ligase	37838	40011.2	41446.9	34737.7	37304.8	37378.4	31633	30919.8	0.0598993	0.0287169	-0.25571
sp|Q9D071|MMS19_MOUSE	Q9D071	MMS19_MOUSE	Mms19	MMS19 nucleotide excision repair protein homolog	32328.1	42797.9	27921	39060.2	34448.6	37624.2	31592.3	46256.1	0.0598565	-0.105697	0.111212
sp|Q8R146|APEH_MOUSE	Q8R146	APEH_MOUSE	Apeh	Acylamino-acid-releasing enzyme	36908.6	44007.8	34887.9	34238.8	37378.9	40295.9	31419.2	32905.5	0.0589844	-0.168205	-0.272073
sp|Q8K4I3|ARHG6_MOUSE	Q8K4I3	ARHG6_MOUSE	Arhgef6	Rho guanine nucleotide exchange factor 6	40353.1	32422.1	37270.7	37915.4	36134.6	33733.3	33518.7	38076.3	0.0588176	0.105837	0.0352288
sp|Q8CI04|COG3_MOUSE	Q8CI04	COG3_MOUSE	Cog3	Conserved oligomeric Golgi complex subunit 3	36421.4	38554	36169.9	35317.9	36299.3	35686.2	37725.6	32929.7	0.0587113	-0.0100096	-0.0269073
sp|Q62383|SPT6H_MOUSE	Q62383	SPT6H_MOUSE	Supt6h	Transcription elongation factor SPT6	29291.6	28196.4	26300.5	26691.3	26436.5	28760.4	57855.8	79350	0.0586726	-0.0588184	1.31368
sp|Q80SY5|PR38B_MOUSE	Q80SY5	PR38B_MOUSE	Prpf38b	Pre-mRNA-splicing factor 38B	29594.8	28441.8	27966.6	25469.4	28062.2	27675.6	58240	86894	0.0583065	-0.0608462	1.38066
sp|P52480|KPYM_MOUSE	P52480	KPYM_MOUSE	Pkm	Pyruvate kinase PKM	37791.5	39003.9	34608.7	34106.7	37821.1	35955.6	36033.7	36778.1	0.0578533	-0.102531	-0.0189928
sp|Q99N93|RM16_MOUSE	Q99N93	RM16_MOUSE	Mrpl16	39S ribosomal protein L16, mitochondrial	14252.7	14277.2	76058.8	134613	13970.8	13439.3	13152.7	10977.4	0.0577662	2.94222	-0.183873
sp|Q9CR50|ZN363_MOUSE	Q9CR50	ZN363_MOUSE	Rchy1	RING finger and CHY zinc finger domain-containing protein 1	44002.2	37809.9	35494.6	14121.8	40780.2	37821.3	47743.3	41674.2	0.0577546	-0.663739	0.185999
sp|Q8VHJ5|MARK1_MOUSE	Q8VHJ5	MARK1_MOUSE	Mark1	Serine/threonine-protein kinase MARK1	37311.3	41894.2	32163.1	37544.7	36053.3	40049.9	33483.7	33607.3	0.0576429	-0.126639	-0.181839
tr|Q99JZ4|Q99JZ4_MOUSE	Q99JZ4	Q99JZ4_MOUSE	Sar1a	GTP-binding protein SAR1a	35920.1	41630.3	43645.1	31530.8	40007.3	34506.8	43894.1	20233.5	0.0576216	0.0127585	-0.216567
sp|Q99KN9|EPN4_MOUSE	Q99KN9	EPN4_MOUSE	Clint1	Clathrin interactor 1	30172.2	37233	45929.3	32222.1	29468.4	35306.6	53271.6	34250.2	0.0574223	0.270833	0.434206
tr|Q80X98|Q80X98_MOUSE	Q80X98	Q80X98_MOUSE	Dhx38	DEAH (Asp-Glu-Ala-His) box polypeptide 38	23621.8	24812	24072.5	21696	22676.4	23894.3	71085.2	100426	0.0565916	-0.0250675	1.88081
sp|Q0VEJ0|CEP76_MOUSE	Q0VEJ0	CEP76_MOUSE	Cep76	Centrosomal protein of 76 kDa	34281.6	35287.1	57556.6	37993.4	36256.9	30645	32531.6	38518.9	0.0563929	0.514209	0.0867972
sp|Q9D4H8|CUL2_MOUSE	Q9D4H8	CUL2_MOUSE	Cul2	Cullin-2	38618.3	37188	34481.2	30976.1	39028.1	33876.7	39242	41684	0.0563034	-0.155461	0.15059
sp|Q6PDK2|KMT2D_MOUSE	Q6PDK2	KMT2D_MOUSE	Kmt2d	Histone-lysine N-methyltransferase 2D	40976.8	36172.2	41119	34866.7	35799.4	38398	34938.2	34470.5	0.0562785	0.0343592	-0.0962529
sp|Q5DTM8|BRE1A_MOUSE	Q5DTM8	BRE1A_MOUSE	Rnf20	E3 ubiquitin-protein ligase BRE1A	35229	34429.2	40410	30906.2	32511.3	34502	40383.8	41863.9	0.0558458	0.0897814	0.295527
sp|O55047|TLK2_MOUSE	O55047	TLK2_MOUSE	Tlk2	Serine/threonine-protein kinase tousled-like 2	32556.3	37186.7	27796.5	47322.7	35649.6	31469	29740.4	46279	0.0553353	0.162469	0.179655
sp|Q9D920|L12R1_MOUSE	Q9D920	L12R1_MOUSE	Loh12cr1	Loss of heterozygosity 12 chromosomal region 1 protein homolog	37041.4	41580.8	35304	34866.6	38156.8	37520.7	35742.5	34496.3	0.0550738	-0.108995	-0.107595
sp|A2A4P0|DHX8_MOUSE	A2A4P0	DHX8_MOUSE	Dhx8	ATP-dependent RNA helicase DHX8	28176.6	31065.5	29094.5	28269.8	27745.3	29288.7	60201.4	70140.7	0.0547986	0.00833135	1.19241
sp|P36552|HEM6_MOUSE	P36552	HEM6_MOUSE	Cpox	Oxygen-dependent coproporphyrinogen-III oxidase, mitochondrial	35726.6	39777.3	45495.4	39245	39217.1	33473.7	24728.6	39703.4	0.0547783	0.221276	-0.173995
sp|Q80ZW0|STK35_MOUSE	Q80ZW0	STK35_MOUSE	Stk35	Serine/threonine-protein kinase 35	37046.7	34829.7	33443.6	33892.3	33572.9	35626.7	39299.3	50208.9	0.0547534	-0.0393876	0.371255
sp|Q8BWU5|OSGEP_MOUSE	Q8BWU5	OSGEP_MOUSE	Osgep	Probable tRNA N6-adenosine threonylcarbamoyltransferase	42400.4	34412	47977	31070.6	37372.7	36583.9	36937.6	32210.2	0.054659	0.0960417	-0.0969968
sp|Q8CIB5|FERM2_MOUSE	Q8CIB5	FERM2_MOUSE	Fermt2	Fermitin family homolog 2	37307	38798.2	41586.5	39476	32480.9	40807.2	34972.7	32046.2	0.0544174	0.145457	-0.129009
sp|Q9Z1G4|VPP1_MOUSE	Q9Z1G4	VPP1_MOUSE	Atp6v0a1	V-type proton ATPase 116 kDa subunit a isoform 1	36673.8	36001.7	47887.4	39933.5	38739.2	31254.9	28091.9	30571.2	0.0542365	0.327331	-0.25478
sp|P02088|HBB1_MOUSE	P02088	HBB1_MOUSE	Hbb-b1	Hemoglobin subunit beta-1	23727.6	37814.2	50231.2	48469.4	29767.1	29506.1	27482.5	35254.8	0.0541873	0.735681	0.0819436
sp|Q8CI11|GNL3_MOUSE	Q8CI11	GNL3_MOUSE	Gnl3	Guanine nucleotide-binding protein-like 3	30443.7	28303.8	27910.8	30326.2	30086.9	26504.6	53804.2	73293.1	0.0539418	0.0413503	1.16728
sp|P63280|UBC9_MOUSE	P63280	UBC9_MOUSE	Ube2i	SUMO-conjugating enzyme UBC9	37074.9	36544.5	35858.5	36916.7	34538.1	36406.5	35924.6	41471.6	0.0533924	0.0367543	0.125571
sp|Q6ZPU9|KBP_MOUSE	Q6ZPU9	KBP_MOUSE	Kbp	KIF1-binding protein	41265.5	34637.3	59694.4	34755.8	39830.7	33378.6	32525.5	29757.5	0.052127	0.367526	-0.233189
sp|P26645|MARCS_MOUSE	P26645	MARCS_MOUSE	Marcks	Myristoylated alanine-rich C-kinase substrate	40372.6	36589.3	42625.3	38545.4	37308.4	36931.9	24729.2	25089.9	0.0519401	0.128754	-0.575503
sp|Q61595|KTN1_MOUSE	Q61595	KTN1_MOUSE	Ktn1	Kinectin	36736.2	37216.4	37928.5	37447.6	34404	36933.7	35836.2	35576.3	0.0519344	0.0794398	0.00151177
sp|Q9JJ89|CCD86_MOUSE	Q9JJ89	CCD86_MOUSE	Ccdc86	Coiled-coil domain-containing protein 86	39193.8	39950.9	38162.4	28929.3	39558.2	36790.9	36353	33846.8	0.0518813	-0.186477	-0.121146
sp|P59997|KDM2A_MOUSE	P59997	KDM2A_MOUSE	Kdm2a	Lysine-specific demethylase 2A	34839.6	34553.9	36252.3	35954.7	34416.3	32549	39137.6	42618.2	0.0513853	0.108725	0.287906
sp|P42859|HD_MOUSE	P42859	HD_MOUSE	Htt	Huntingtin	30884	48058.7	30838.2	34286.8	38571.7	37615	33917.3	37396	0.0512653	-0.226328	-0.0953693
sp|Q8CIN4|PAK2_MOUSE	Q8CIN4	PAK2_MOUSE	Pak2	Serine/threonine-protein kinase PAK 2	40163.7	31167.3	38470.8	38040.3	35187.8	33660.1	40300.7	37158.1	0.0511182	0.152257	0.170018
sp|Q8K2T8|PAF1_MOUSE	Q8K2T8	PAF1_MOUSE	Paf1	RNA polymerase II-associated factor 1 homolog	32889.6	34147.7	28908.8	36678.7	32117.5	32590	41414.8	53429.3	0.0510292	0.0194876	0.551624
sp|Q9CQF8|RT63_MOUSE	Q9CQF8	RT63_MOUSE	Mrpl57	Ribosomal protein 63, mitochondrial	16122.7	19837.5	104433	102548	18725	15988.7	13796.7	20985.8	0.0508957	2.57592	0.0028541
tr|Q3TMX5|Q3TMX5_MOUSE	Q3TMX5	Q3TMX5_MOUSE	Manf	Arginine-rich, mutated in early stage tumors, isoform CRA_b	48265.9	33038.6	39131.5	29991.8	43386.2	35100.3	37986.6	25095.2	0.0508909	-0.183273	-0.315222
sp|O88502|PDE8A_MOUSE	O88502	PDE8A_MOUSE	Pde8a	High affinity cAMP-specific and IBMX-insensitive 3',5'-cyclic phosphodiesterase 8A	36043.2	37375.9	53059.6	39083.1	37723.6	33153.4	33418.8	36813.2	0.050841	0.378554	-0.0131884
sp|P14148|RL7_MOUSE	P14148	RL7_MOUSE	Rpl7	60S ribosomal protein L7	33591.6	38887.7	29150.9	37036.3	31953.4	38049.4	37696.5	44758.7	0.050155	-0.08086	0.236199
sp|P98083|SHC1_MOUSE	P98083	SHC1_MOUSE	Shc1	SHC-transforming protein 1	38502.7	34500.6	44212.8	39063.4	34017	36495.8	34982.3	32017.1	0.0500747	0.240019	-0.0737376
sp|O35685|NUDC_MOUSE	O35685	NUDC_MOUSE	Nudc	Nuclear migration protein nudC	42486.7	35605.6	37103.5	30049.1	38709	36726.1	35845.2	37152.8	0.0499433	-0.167794	-0.0473783
sp|Q9Z1F9|SAE2_MOUSE	Q9Z1F9	SAE2_MOUSE	Uba2	SUMO-activating enzyme subunit 2	39631.6	34394.4	36996.7	34676.1	36125.5	35383.6	37923.2	38121.5	0.0499043	0.00329822	0.0887191
sp|Q8R4R6|NUP53_MOUSE	Q8R4R6	NUP53_MOUSE	Nup35	Nucleoporin NUP53	36752.1	39808.3	29981.1	36905.7	37740.9	36236.7	36988.3	35336.1	0.0495098	-0.145368	-0.0326077
sp|Q8BK64|AHSA1_MOUSE	Q8BK64	AHSA1_MOUSE	Ahsa1	Activator of 90 kDa heat shock protein ATPase homolog 1	38095.7	35750.3	31861.2	39284.3	34921.4	36458.8	39016.1	35375.9	0.0489941	-0.00475257	0.0596213
sp|Q9CQ28|DPH6_MOUSE	Q9CQ28	DPH6_MOUSE	Dph6	Diphthine--ammonia ligase	34851	32331.5	43165.3	34934.7	33415.4	31525.9	48524.8	43131.9	0.0489473	0.266185	0.497104
sp|P62137|PP1A_MOUSE	P62137	PP1A_MOUSE	Ppp1ca	Serine/threonine-protein phosphatase PP1-alpha catalytic subunit	33214.2	39826.4	38249.6	32836.2	31074.9	39530.6	35346.7	51740.1	0.0489182	0.00978064	0.302674
sp|Q03958|PFD6_MOUSE	Q03958	PFD6_MOUSE	Pfdn6	Prefoldin subunit 6	42992.7	31820.8	41251.8	38104.5	37270.7	35063	34600.7	30216.1	0.0486309	0.133677	-0.158299
sp|Q80Y17|L2GL1_MOUSE	Q80Y17	L2GL1_MOUSE	Llgl1	Lethal(2) giant larvae protein homolog 1	35966.4	37254.9	33411.6	32953.4	38114	32681.1	37751.9	41529.1	0.0486126	-0.0932261	0.163326
sp|Q8K2D3|EDC3_MOUSE	Q8K2D3	EDC3_MOUSE	Edc3	Enhancer of mRNA-decapping protein 3	41001	37902.8	36225.7	30891	41922.1	34377	37484.5	31448.6	0.0484289	-0.184995	-0.146471
sp|O08553|DPYL2_MOUSE	O08553	DPYL2_MOUSE	Dpysl2	Dihydropyrimidinase-related protein 2	35305.4	39158.8	39028.5	40580.3	33520.6	38488.2	32822	33820.6	0.0483737	0.144755	-0.111729
sp|Q148V7|K1468_MOUSE	Q148V7	K1468_MOUSE	Kiaa1468	LisH domain and HEAT repeat-containing protein KIAA1468	37585	36785.2	40234.3	35954.3	36440.4	35477.6	36186.4	35173.8	0.048372	0.0832224	-0.0112332
sp|Q9Z1Z2|STRAP_MOUSE	Q9Z1Z2	STRAP_MOUSE	Strap	Serine-threonine kinase receptor-associated protein	35585.8	40350.5	28439.8	32861.6	37279.9	36160.2	37298	43686.8	0.0482238	-0.260647	0.141083
sp|Q03265|ATPA_MOUSE	Q03265	ATPA_MOUSE	Atp5a1	ATP synthase subunit alpha, mitochondrial	37549.7	40996.6	33614.5	38075.4	36905.5	39073.5	33655	33619.5	0.0479422	-0.0838322	-0.175542
sp|O54998|FKBP7_MOUSE	O54998	FKBP7_MOUSE	Fkbp7	Peptidyl-prolyl cis-trans isomerase FKBP7	46414.9	35171.9	31609.7	31738.3	39362.4	39558.7	34575.8	24561.9	0.0479242	-0.317112	-0.416331
sp|Q9Z2M7|PMM2_MOUSE	Q9Z2M7	PMM2_MOUSE	Pmm2	Phosphomannomutase 2	43170.4	33890.7	36879.5	28370.4	41016.8	33537.3	37036.7	32160.7	0.0477156	-0.192312	-0.10757
sp|Q2TBA3|MALT1_MOUSE	Q2TBA3	MALT1_MOUSE	Malt1	Mucosa-associated lymphoid tissue lymphoma translocation protein 1 homolog	35276.8	41294.7	32031.2	35509.9	41583.2	32504.3	29744.5	37839.1	0.0475755	-0.133465	-0.132559
sp|Q6ZQJ5|DNA2_MOUSE	Q6ZQJ5	DNA2_MOUSE	Dna2	DNA replication ATP-dependent helicase/nuclease DNA2	25130.9	33800.6	37782.9	30309.4	29128.1	27893.7	63168.1	57054.1	0.0475277	0.255978	1.07612
sp|P61967|AP1S1_MOUSE	P61967	AP1S1_MOUSE	Ap1s1	AP-1 complex subunit sigma-1A	31955.8	45111.2	38578	36351.8	35770.5	38806.6	31079.1	42452	0.0473808	0.00680673	-0.0203781
sp|P97434|MPRIP_MOUSE	P97434	MPRIP_MOUSE	Mprip	Myosin phosphatase Rho-interacting protein	35919.2	38428.6	42366.1	39643.3	34795.4	37169.5	33104.4	36204.8	0.0469972	0.188497	-0.0542472
sp|Q9EPJ9|ARFG1_MOUSE	Q9EPJ9	ARFG1_MOUSE	Arfgap1	ADP-ribosylation factor GTPase-activating protein 1	40428.2	36798.9	31195	35954.4	38911.8	35844	36353	31816.4	0.0469209	-0.154811	-0.133061
sp|Q9CQ45|NENF_MOUSE	Q9CQ45	NENF_MOUSE	Nenf	Neudesin	45557.2	34092.3	33364.3	39737.3	40970.9	36141.4	37059.5	26628.6	0.0467037	-0.0770581	-0.275938
sp|Q64010|CRK_MOUSE	Q64010	CRK_MOUSE	Crk	Adapter molecule crk	40212.7	34160.4	41725.8	37090.5	33222.6	38795.8	31407.6	34510.4	0.0464156	0.130129	-0.127694
sp|O55023|IMPA1_MOUSE	O55023	IMPA1_MOUSE	Impa1	Inositol monophosphatase 1	41653.5	33568.7	25611.9	42777.9	36752.6	36126.6	30491	37390.7	0.0456525	-0.091725	-0.102484
sp|Q3TJD7|PDLI7_MOUSE	Q3TJD7	PDLI7_MOUSE	Pdlim7	PDZ and LIM domain protein 7	36448.5	37894.1	47998.4	37471.6	35111.2	36929.1	33609.1	36377.8	0.045386	0.246613	-0.0417182
sp|P56480|ATPB_MOUSE	P56480	ATPB_MOUSE	Atp5b	ATP synthase subunit beta, mitochondrial	36585.8	41676.2	32295.5	39762.2	35543.1	40301	31177.2	36159	0.0452744	-0.0738854	-0.171656
sp|P56581|TDG_MOUSE	P56581	TDG_MOUSE	Tdg	G/T mismatch-specific thymine DNA glycosylase	37851.6	33521.3	33789.9	37119.2	32991.2	36178.3	40032.8	43361.5	0.0452404	0.0358354	0.269813
sp|Q9EP89|LACTB_MOUSE	Q9EP89	LACTB_MOUSE	Lactb	Serine beta-lactamase-like protein LACTB, mitochondrial	34790.9	39127.8	34573	39239.5	39529.6	32112	32505.5	34688.7	0.0451425	0.0430655	-0.0924632
sp|P46460|NSF_MOUSE	P46460	NSF_MOUSE	Nsf	Vesicle-fusing ATPase	33237.3	43908.3	31262.1	35756.9	34776.2	40021.6	30726.2	40352.5	0.0445891	-0.158424	-0.0735798
sp|Q6GV12|KDSR_MOUSE	Q6GV12	KDSR_MOUSE	Kdsr	3-ketodihydrosphingosine reductase	33529.9	39073.3	36176.6	35249.8	38625.4	31773.2	44115.2	31486.2	0.0444849	0.0209103	0.102867
sp|P31750|AKT1_MOUSE	P31750	AKT1_MOUSE	Akt1	RAC-alpha serine/threonine-protein kinase	38859.1	41647.4	32333.9	32068.6	42025.8	36043.6	31964.5	32228.2	0.0443478	-0.277642	-0.282349
sp|Q9QXK3|COPG2_MOUSE	Q9QXK3	COPG2_MOUSE	Copg2	Coatomer subunit gamma-2	39651.2	39878.1	32680.3	33928.3	37707.3	39415.2	36880	30587	0.044335	-0.211445	-0.19297
sp|P28656|NP1L1_MOUSE	P28656	NP1L1_MOUSE	Nap1l1	Nucleosome assembly protein 1-like 1	42895.2	37761.7	40426.6	33471.6	38204.8	40018.5	28073.6	27799.9	0.044198	-0.0820598	-0.485434
sp|Q9D1H8|RM53_MOUSE	Q9D1H8	RM53_MOUSE	Mrpl53	39S ribosomal protein L53, mitochondrial	23573.6	25442.2	33367.3	96072.1	28677	18866.5	24519.2	18417.7	0.0439979	1.44496	-0.147032
sp|P27773|PDIA3_MOUSE	P27773	PDIA3_MOUSE	Pdia3	Protein disulfide-isomerase A3	36601.8	44886.6	28885.4	36746.8	38385.7	40681	31866.9	30913.3	0.0435247	-0.268667	-0.332761
sp|O35704|SPTC1_MOUSE	O35704	SPTC1_MOUSE	Sptlc1	Serine palmitoyltransferase 1	40519.2	37155.7	41331.8	39051.8	38403.1	36965.5	32716.5	26635.4	0.0434855	0.0929367	-0.34467
sp|Q9ER72|SYCC_MOUSE	Q9ER72	SYCC_MOUSE	Cars	Cysteine--tRNA ligase, cytoplasmic	37019.5	42283.3	32814.8	31142.1	39904.7	37096.9	34744.7	36607.5	0.042485	-0.267789	-0.109931
sp|P61965|WDR5_MOUSE	P61965	WDR5_MOUSE	Wdr5	WD repeat-containing protein 5	31787.6	31864.7	31294.7	34491.7	30539.2	31269.2	46721.4	65389.1	0.0424106	0.0899848	0.859047
sp|Q99JB2|STML2_MOUSE	Q99JB2	STML2_MOUSE	Stoml2	Stomatin-like protein 2, mitochondrial	39845.2	37610.9	31525.4	39223.6	38514.6	36705.2	37324.2	32231.8	0.0422662	-0.0884028	-0.112937
sp|O08915|AIP_MOUSE	O08915	AIP_MOUSE	Aip	AH receptor-interacting protein	37913.9	35056.1	39254.8	34685.1	38279.7	32584.7	38296.7	37081.1	0.0422424	0.0612916	0.0890762
sp|P51410|RL9_MOUSE	P51410	RL9_MOUSE	Rpl9	60S ribosomal protein L9	46012.2	34207.4	38021.4	31186	41945.1	35965.1	36341.1	25734.8	0.0421405	-0.170886	-0.32778
sp|Q8C1A5|THOP1_MOUSE	Q8C1A5	THOP1_MOUSE	Thop1	Thimet oligopeptidase	33176.3	31546.6	31811.9	28053.6	32436.8	30434.6	46612.5	62509.5	0.041872	-0.0706808	0.795466
sp|Q61553|FSCN1_MOUSE	Q61553	FSCN1_MOUSE	Fscn1	Fascin	32966.5	40694.5	34721.6	36205.7	34893.1	36692.2	35704.5	37092.7	0.0412363	-0.0133216	0.0242182
sp|Q3UQ44|IQGA2_MOUSE	Q3UQ44	IQGA2_MOUSE	Iqgap2	Ras GTPase-activating-like protein IQGAP2	32356.8	41580	41585.7	35223.5	37141.3	34714	37983.4	30507.5	0.0411968	0.096184	-0.0691827
sp|Q3TJZ6|FA98A_MOUSE	Q3TJZ6	FA98A_MOUSE	Fam98a	Protein FAM98A	36744.6	39452	36129.9	37167.5	38812.7	35246.3	34166.1	42450.5	0.0410503	-0.0149119	0.0489808
sp|Q9CZX0|ELP3_MOUSE	Q9CZX0	ELP3_MOUSE	Elp3	Elongator complex protein 3	36839.9	39230.1	42153.4	36995.8	31731.5	42209.5	34460	42353.8	0.0409526	0.0982015	0.0549923
sp|Q91V92|ACLY_MOUSE	Q91V92	ACLY_MOUSE	Acly	ATP-citrate synthase	37967.9	37248.5	35286.3	34097.5	38071.3	35042.6	37565.3	34921.8	0.0409007	-0.0755474	-0.0124231
sp|Q8BH69|SPS1_MOUSE	Q8BH69	SPS1_MOUSE	Sephs1	Selenide, water dikinase 1	36897.5	30106.1	39614.1	37990.2	31607.1	33524.2	34846	55849.6	0.040886	0.252785	0.47768
sp|P53811|PIPNB_MOUSE	P53811	PIPNB_MOUSE	Pitpnb	Phosphatidylinositol transfer protein beta isoform	40764.9	32238.6	35902.2	36844.3	36669.5	34305.8	35708.1	41730.6	0.0406493	0.0355605	0.125738
sp|Q05512|MARK2_MOUSE	Q05512	MARK2_MOUSE	Mark2	Serine/threonine-protein kinase MARK2	32567	41605.5	26314.3	40041.8	34573	37570.1	36787.5	35279.7	0.0400251	-0.120631	-0.00151651
sp|Q99MN1|SYK_MOUSE	Q99MN1	SYK_MOUSE	Kars	Lysine--tRNA ligase	39455.2	38849.9	32331.7	35411.6	36775.4	39396.2	34064.4	35310	0.0398538	-0.169174	-0.134851
sp|Q14AX6|CDK12_MOUSE	Q14AX6	CDK12_MOUSE	Cdk12	Cyclin-dependent kinase 12	29026.5	31799.5	33584.3	27062.8	29473.4	29726.3	49726.2	75342	0.039099	0.0348485	1.07905
sp|P58871|TB182_MOUSE	P58871	TB182_MOUSE	Tnks1bp1	182 kDa tankyrase-1-binding protein	40930.8	39218.5	41973.3	36824.3	37657.2	40354.6	29951.3	34664.8	0.0389964	0.0144597	-0.271798
sp|Q8CHC4|SYNJ1_MOUSE	Q8CHC4	SYNJ1_MOUSE	Synj1	Synaptojanin-1	43362.2	31408.4	28334.8	37741.4	39122.5	33663.6	32968.5	36572.8	0.0388105	-0.139529	-0.0657909
sp|P35293|RAB18_MOUSE	P35293	RAB18_MOUSE	Rab18	Ras-related protein Rab-18	32873.9	40998.2	37221.4	36756	35497.5	36425	35883.2	35856.6	0.0385855	0.0406427	-0.0036711
sp|Q91VR5|DDX1_MOUSE	Q91VR5	DDX1_MOUSE	Ddx1	ATP-dependent RNA helicase DDX1	31814.2	33180.5	35985.6	28482.9	30745.9	32543.7	44704.6	66336.4	0.0383524	0.0266271	0.811052
sp|P57780|ACTN4_MOUSE	P57780	ACTN4_MOUSE	Actn4	Alpha-actinin-4	40455.2	36743.5	40138.7	34102.4	37729.4	37444.3	35281.4	30469.1	0.0383496	-0.0180085	-0.193227
sp|Q69ZA1|CDK13_MOUSE	Q69ZA1	CDK13_MOUSE	Cdk13	Cyclin-dependent kinase 13	29811.3	26499.3	27689.5	31451.4	28931.5	25902.8	58365.5	71482.9	0.0383303	0.10908	1.24368
sp|P14206|RSSA_MOUSE	P14206	RSSA_MOUSE	Rpsa	40S ribosomal protein SA	44119.1	33188.1	33371.4	34519.1	39950.9	35334.2	40362.9	27692.6	0.0382374	-0.149155	-0.145654
sp|Q61739|ITA6_MOUSE	Q61739	ITA6_MOUSE	Itga6	Integrin alpha-6	32307	41122.4	39698.8	34484.1	36339.1	35179.7	36624.5	34978.3	0.0380357	0.0527637	0.0016928
sp|Q8BGV8|MID51_MOUSE	Q8BGV8	MID51_MOUSE	Mief1	Mitochondrial dynamics protein MID51	22798.1	47843.9	31298.6	45497.6	37219.2	31589.8	35506.4	48158.7	0.0379282	0.158437	0.282028
tr|Q91V55|Q91V55_MOUSE	Q91V55	Q91V55_MOUSE	Rps5	40S ribosomal protein S5	39535.3	33432.4	37580.4	41675.9	35543.1	35536.7	35828	33392.1	0.0378168	0.157086	-0.0382493
sp|Q6P4T2|U520_MOUSE	Q6P4T2	U520_MOUSE	Snrnp200	U5 small nuclear ribonucleoprotein 200 kDa helicase	26724.1	25250.5	23251.5	24021	25985.2	24650.3	66828.4	94998	0.0376577	-0.0991507	1.67623
sp|Q9JMK2|KC1E_MOUSE	Q9JMK2	KC1E_MOUSE	Csnk1e	Casein kinase I isoform epsilon	34032.4	37248.5	48608	35873	32008.6	37436.3	36132.5	38817.6	0.0376449	0.282758	0.110062
sp|Q8BK63|KC1A_MOUSE	Q8BK63	KC1A_MOUSE	Csnk1a1	Casein kinase I isoform alpha	30708	34836.2	34748.6	34909.8	31182.2	32675.9	48046.4	52576.9	0.0375976	0.125428	0.656021
sp|Q01705|NOTC1_MOUSE	Q01705	NOTC1_MOUSE	Notch1	Neurogenic locus notch homolog protein 1	37518.4	41489.3	36230.5	35780.9	39085.5	37901.7	30597.7	42660.2	0.0373748	-0.0963927	-0.0716342
sp|Q61466|SMRD1_MOUSE	Q61466	SMRD1_MOUSE	Smarcd1	SWI/SNF-related matrix-associated actin-dependent regulator of chromatin subfamily D member 1	41635.8	28646.2	39009.8	29494.9	36229.3	32263.2	43515.8	50611.7	0.0372097	0.000257327	0.458669
sp|P62849|RS24_MOUSE	P62849	RS24_MOUSE	Rps24	40S ribosomal protein S24	40199.6	35761.6	37054	39724.8	36367.7	37682	34369.4	26556.6	0.0367703	0.0522154	-0.281435
sp|Q9DBD5|PELP1_MOUSE	Q9DBD5	PELP1_MOUSE	Pelp1	Proline-, glutamic acid- and leucine-rich protein 1	44005.3	33129.2	39224.5	30981.6	37489	37708.6	38829.2	30968.7	0.0366914	-0.0990898	-0.107502
sp|Q5I043|UBP28_MOUSE	Q5I043	UBP28_MOUSE	Usp28	Ubiquitin carboxyl-terminal hydrolase 28	31004.3	34803.4	34669.4	34509.5	30390	33776.1	47112.7	53954.9	0.0364425	0.108518	0.655436
sp|Q9CVB6|ARPC2_MOUSE	Q9CVB6	ARPC2_MOUSE	Arpc2	Actin-related protein 2/3 complex subunit 2	36125	43998.4	31940.8	37593.8	33997.3	44140.6	29863.1	33165.7	0.0361999	-0.168291	-0.310013
sp|O08811|ERCC2_MOUSE	O08811	ERCC2_MOUSE	Ercc2	TFIIH basal transcription factor complex helicase XPD subunit	29215.5	42645.8	27759.4	36791.1	33901.7	36180.9	37151.3	43888.2	0.0361588	-0.11863	0.209566
sp|Q91YQ5|RPN1_MOUSE	Q91YQ5	RPN1_MOUSE	Rpn1	Dolichyl-diphosphooligosaccharide--protein glycosyltransferase subunit 1	37455.5	41597.3	28550.3	30658.2	38867.4	38231.7	40410.4	34560.6	0.0361021	-0.380908	-0.0403804
sp|Q01279|EGFR_MOUSE	Q01279	EGFR_MOUSE	Egfr	Epidermal growth factor receptor	44276.9	35091.8	39299.6	33921	38580.2	38836.5	29558.2	32096.6	0.0359251	-0.0803962	-0.328431
sp|E9PZJ8|ASCC3_MOUSE	E9PZJ8	ASCC3_MOUSE	Ascc3	Activating signal cointegrator 1 complex subunit 3	34681.6	41389.1	39686.5	39303.7	34427.7	39778.3	30904.8	33311.2	0.0358073	0.0901384	-0.208602
sp|Q811D0|DLG1_MOUSE	Q811D0	DLG1_MOUSE	Dlg1	Disks large homolog 1	38215.2	38906.2	50267.2	32675.6	44670.8	30563.2	37092.9	24102.9	0.0357457	0.140732	-0.297953
sp|A2AQ19|RTF1_MOUSE	A2AQ19	RTF1_MOUSE	Rtf1	RNA polymerase-associated protein RTF1 homolog	37659.8	29687.5	32604.6	29108.3	35578.8	30133.6	49200.6	49880.4	0.0354554	-0.0905939	0.592443
sp|P13705|MSH3_MOUSE	P13705	MSH3_MOUSE	Msh3	DNA mismatch repair protein Msh3	36737.7	38552.1	29267	36079.2	39364.9	34104.3	36049.6	32112	0.0353151	-0.169035	-0.108179
sp|Q9D358|PPAC_MOUSE	Q9D358	PPAC_MOUSE	Acp1	Low molecular weight phosphotyrosine protein phosphatase	34712.3	37516.2	41556.9	35707	33945.6	36539.7	29495	45398.8	0.0352469	0.132474	0.0875262
sp|P59328|WDHD1_MOUSE	P59328	WDHD1_MOUSE	Wdhd1	WD repeat and HMG-box DNA-binding protein 1	34777.2	31598	40821.7	36779.4	37984.4	26790.1	34370.7	51465.1	0.035218	0.260652	0.406154
sp|Q8CEI1|BOLA3_MOUSE	Q8CEI1	BOLA3_MOUSE	Bola3	BolA-like protein 3	34255.5	36351.6	40541.8	41993	32707.7	36202.1	36209.1	37251.2	0.0351059	0.260296	0.0922585
sp|Q8CD92|TTC27_MOUSE	Q8CD92	TTC27_MOUSE	Ttc27	Tetratricopeptide repeat protein 27	33378.3	41401.7	28635.4	38721.5	36801.3	36197.6	34321.7	35754.2	0.0347774	-0.116049	-0.0589564
sp|Q9WUK2|IF4H_MOUSE	Q9WUK2	IF4H_MOUSE	Eif4h	Eukaryotic translation initiation factor 4H	36472.5	33422.8	34455.1	36692.1	33829.5	34404.6	39377.2	44145.4	0.0347034	0.0603157	0.291674
sp|P12023|A4_MOUSE	P12023	A4_MOUSE	App	Amyloid beta A4 protein	36456	36441.3	34812.9	37750.7	39469.6	31713.4	41709.9	33824.6	0.0343327	0.0277137	0.0856035
sp|P35276|RAB3D_MOUSE	P35276	RAB3D_MOUSE	Rab3d	Ras-related protein Rab-3D	44664.2	31536.9	32381	33282.3	38140.5	36273.7	36594.2	40583.7	0.0342321	-0.180493	0.052608
sp|Q9JKC8|AP3M1_MOUSE	Q9JKC8	AP3M1_MOUSE	Ap3m1	AP-3 complex subunit mu-1	43763.3	34627.5	37015.9	29655.5	42832.8	33736.4	34156.1	28820.5	0.0339207	-0.199695	-0.281947
sp|Q8K194|SNR27_MOUSE	Q8K194	SNR27_MOUSE	Snrnp27	U4/U6.U5 small nuclear ribonucleoprotein 27 kDa protein	25890.4	24465.9	30377.7	24877.1	24749.3	24436.9	66900.8	91847.4	0.0339189	0.167847	1.69041
sp|Q6A068|CDC5L_MOUSE	Q6A068	CDC5L_MOUSE	Cdc5l	Cell division cycle 5-like protein	26929	22981.3	22334.6	19397.8	26083.2	22670.2	69799.3	105237	0.0338354	-0.224333	1.84408
sp|Q9EPE9|AT131_MOUSE	Q9EPE9	AT131_MOUSE	Atp13a1	Manganese-transporting ATPase 13A1	35663	38857.7	37364	34503.2	35454.6	37353.3	37596.2	35971.8	0.0335452	-0.0187622	0.0149812
sp|Q9WVM1|RGAP1_MOUSE	Q9WVM1	RGAP1_MOUSE	Racgap1	Rac GTPase-activating protein 1	37754.8	32844.4	33461	31703	34257.5	34725	45832.4	34410.8	0.0334201	-0.082157	0.218147
sp|Q6PCM2|INT6_MOUSE	Q6PCM2	INT6_MOUSE	Ints6	Integrator complex subunit 6	39083.3	31973.5	22103.9	37048.3	35554.9	33880.8	40355.8	45961.3	0.0332962	-0.231244	0.31397
sp|P60003|ELOF1_MOUSE	P60003	ELOF1_MOUSE	Elof1	Transcription elongation factor 1 homolog	34565.9	32578.9	60794.5	31867.5	31130.6	34482.4	41303.4	46531.1	0.0332933	0.497996	0.420805
sp|Q02395|MTF2_MOUSE	Q02395	MTF2_MOUSE	Mtf2	Metal-response element-binding transcription factor 2	28148.9	43899.3	25690.3	39289.2	30147.7	40273.1	42791.8	38080.6	0.0329611	-0.116019	0.199645
sp|Q91ZJ5|UGPA_MOUSE	Q91ZJ5	UGPA_MOUSE	Ugp2	UTP--glucose-1-phosphate uridylyltransferase	37990.4	40889.1	41338.3	37015.9	37520.7	39579.2	28219.7	26905.2	0.0329226	0.0232817	-0.484025
sp|Q62376|RU17_MOUSE	Q62376	RU17_MOUSE	Snrnp70	U1 small nuclear ribonucleoprotein 70 kDa	11992.4	8024.43	12834.5	9502.81	12581.3	6984.99	138732	119801	0.0328437	0.191087	3.72391
sp|Q9R1X4|TIM_MOUSE	Q9R1X4	TIM_MOUSE	Timeless	Protein timeless homolog	43216.7	25880.8	46438.9	31633.7	36415.5	31128.7	54642.6	27940.8	0.0328028	0.208984	0.29002
sp|Q8JZM7|CDC73_MOUSE	Q8JZM7	CDC73_MOUSE	Cdc73	Parafibromin	35070.2	32844.7	28263.2	31149.2	34795.9	31601.3	47297.3	52476.4	0.0326048	-0.160361	0.587537
sp|Q921M7|FA49B_MOUSE	Q921M7	FA49B_MOUSE	Fam49b	Protein FAM49B	33618.8	38732.2	40664.1	34259.9	37366.8	33379.5	37090.9	39012.4	0.0323595	0.0827734	0.105303
sp|Q3TPE9|ANKY2_MOUSE	Q3TPE9	ANKY2_MOUSE	Ankmy2	Ankyrin repeat and MYND domain-containing protein 2	41623.3	39240.8	33891.4	38081.2	35972.6	43099.1	32116.7	30918.1	0.0323375	-0.135713	-0.327011
sp|P61458|PHS_MOUSE	P61458	PHS_MOUSE	Pcbd1	Pterin-4-alpha-carbinolamine dehydratase	39389.7	31589.6	38588.1	40112.5	36754.4	32654.8	33022.3	36406.3	0.0322714	0.181247	0.000402909
sp|Q8BUL6|PKHA1_MOUSE	Q8BUL6	PKHA1_MOUSE	Plekha1	Pleckstrin homology domain-containing family A member 1	39983	38956.5	34828.3	33968.4	33522.1	43699	35608.4	35050.6	0.031753	-0.166656	-0.12812
sp|Q8BUN5|SMAD3_MOUSE	Q8BUN5	SMAD3_MOUSE	Smad3	Mothers against decapentaplegic homolog 3	38950.6	34287.9	32658.1	32948.4	37313	34340.9	36437	45848.6	0.0315573	-0.127208	0.199596
sp|Q8BHK9|ERC6L_MOUSE	Q8BHK9	ERC6L_MOUSE	Ercc6l	DNA excision repair protein ERCC-6-like	37834.8	37415.8	31631.7	40371.6	36214	37424.1	33932.6	37845.6	0.0312501	-0.0323894	-0.0369077
sp|Q9D7G0|PRPS1_MOUSE	Q9D7G0	PRPS1_MOUSE	Prps1	Ribose-phosphate pyrophosphokinase 1	41968.6	37075.5	35982.1	35362	39215.5	38136.1	32341.8	31352.9	0.0312249	-0.116637	-0.280259
sp|Q99KV1|DJB11_MOUSE	Q99KV1	DJB11_MOUSE	Dnajb11	DnaJ homolog subfamily B member 11	46643.8	34771.5	37953.5	37654.9	42582.8	37092.1	34608.5	23477.2	0.0311748	-0.0755785	-0.455941
sp|Q9CXF4|TBC15_MOUSE	Q9CXF4	TBC15_MOUSE	Tbc1d15	TBC1 domain family member 15	36740	42238.6	36119.9	38110.5	34682.3	42610.7	30520.3	35310.5	0.0311251	-0.0583275	-0.231576
sp|Q8CI71|CC132_MOUSE	Q8CI71	CC132_MOUSE	Ccdc132	Coiled-coil domain-containing protein 132	42472.6	33722.6	37922.8	38395.9	33497.2	41086.3	35148.1	30203.4	0.0308427	0.0331798	-0.190637
sp|A2RTL5|RSRC2_MOUSE	A2RTL5	RSRC2_MOUSE	Rsrc2	Arginine/serine-rich coiled-coil protein 2	18181.3	23564.8	15847.1	22447.9	20321.7	20543.9	85200.4	105192	0.0307509	-0.0937316	2.22002
sp|Q9R0X0|MED20_MOUSE	Q9R0X0	MED20_MOUSE	Med20	Mediator of RNA polymerase II transcription subunit 20	32778.6	39987.3	37272	33401.5	39111.5	32125.1	42928.2	38328.2	0.0306427	-0.0114494	0.189863
sp|P62806|H4_MOUSE	P62806	H4_MOUSE	Hist1h4a	Histone H4	39879	35700.6	44376.3	34209.6	38877.7	35114.4	34696.6	33311.8	0.0306244	0.0868972	-0.12166
sp|Q3UWM4|KDM7_MOUSE	Q3UWM4	KDM7_MOUSE	Kdm7a	Lysine-specific demethylase 7A	32366.8	43356.5	44364.8	38144.5	34626	39527.9	30117.7	32422.8	0.0302162	0.154036	-0.245731
sp|Q9JIF7|COPB_MOUSE	Q9JIF7	COPB_MOUSE	Copb1	Coatomer subunit beta	38807.5	38602.3	38949.8	37367.3	37995.6	37835.2	32093.1	28067.4	0.02973	0.00922001	-0.333969
sp|Q91WK2|EIF3H_MOUSE	Q91WK2	EIF3H_MOUSE	Eif3h	Eukaryotic translation initiation factor 3 subunit H	22817.1	50707.7	40834	41076	33052	38991.6	25334.9	49321.9	0.0293613	0.18517	0.0514031
sp|Q69ZX6|MOR2A_MOUSE	Q69ZX6	MOR2A_MOUSE	Morc2a	MORC family CW-type zinc finger protein 2A	42158.3	31856.8	28457.9	30816.4	31838.7	40691.7	46333.6	37358.5	0.0292327	-0.291179	0.206507
tr|Q4VA93|Q4VA93_MOUSE	Q4VA93	Q4VA93_MOUSE	Prkca	Protein kinase C	41075.2	37384	38759.4	40648.1	35084.9	41807.2	31916.9	28328.3	0.0291077	0.0464398	-0.351989
sp|P70182|PI51A_MOUSE	P70182	PI51A_MOUSE	Pip5k1a	Phosphatidylinositol 4-phosphate 5-kinase type-1 alpha	34556.7	37384.3	41439.8	37831	36430	34097.4	25641.2	38274.3	0.0286296	0.168604	-0.142019
sp|Q61655|DD19A_MOUSE	Q61655	DD19A_MOUSE	Ddx19a	ATP-dependent RNA helicase DDX19A	26514.4	47186.1	27973.2	45904	30849.9	41403.7	24386.9	37656.5	0.0286043	0.0320582	-0.219792
sp|Q61656|DDX5_MOUSE	Q61656	DDX5_MOUSE	Ddx5	Probable ATP-dependent RNA helicase DDX5	21451.9	22871.3	18229.7	22852.8	19288.3	24165.3	68874.6	118019	0.0285839	-0.0809516	2.10467
sp|O88477|IF2B1_MOUSE	O88477	IF2B1_MOUSE	Igf2bp1	Insulin-like growth factor 2 mRNA-binding protein 1	34674.2	41244.6	28716.1	37408.4	35235.3	39196	32420.5	36703.8	0.028549	-0.170724	-0.106716
sp|P25206|MCM3_MOUSE	P25206	MCM3_MOUSE	Mcm3	DNA replication licensing factor MCM3	35653.7	33650.3	30755.6	33111.7	34048.5	33920.1	46294.2	45077	0.0280698	-0.0897913	0.426869
tr|D3YTQ3|D3YTQ3_MOUSE	D3YTQ3	D3YTQ3_MOUSE	Hnrnpdl	Heterogeneous nuclear ribonucleoprotein D-like	29872	25393.6	27892.2	27215.8	28012	26196.5	62164.6	77487.5	0.027862	0.023743	1.36525
sp|Q6IFZ6|K2C1B_MOUSE	Q6IFZ6	K2C1B_MOUSE	Krt77	Keratin, type II cytoskeletal 1b	22352.7	49280.1	135326	21537.8	22646.9	47619.8	21988.4	29514.2	0.0277793	1.1586	-0.448194
sp|Q922D8|C1TC_MOUSE	Q922D8	C1TC_MOUSE	Mthfd1	C-1-tetrahydrofolate synthase, cytoplasmic	39548.8	34786.9	33563.7	37346.7	37509	35410.8	36544.8	35881.5	0.0277454	-0.0403129	-0.00979708
sp|Q9D5V5|CUL5_MOUSE	Q9D5V5	CUL5_MOUSE	Cul5	Cullin-5	33944.7	38484.4	32263.3	37464.3	32746.1	38306.4	35812.6	46450.3	0.0276841	-0.027156	0.211355
sp|Q91YQ1|RAB7L_MOUSE	Q91YQ1	RAB7L_MOUSE	Rab29	Ras-related protein Rab-7L1	39564.2	39531.5	42213	33842.3	36491.8	41104.7	30797.9	31610	0.027608	-0.028941	-0.31426
sp|P70280|VAMP7_MOUSE	P70280	VAMP7_MOUSE	Vamp7	Vesicle-associated membrane protein 7	44671.4	33037.1	38171	29651.7	39463.5	36791.2	43724.9	30931.2	0.027246	-0.169056	-0.0305656
sp|Q9EQH3|VPS35_MOUSE	Q9EQH3	VPS35_MOUSE	Vps35	Vacuolar protein sorting-associated protein 35	35188.2	41267.7	35193.3	38161.8	35874.7	39158.1	31248.2	34429.6	0.0271066	-0.0326233	-0.192116
tr|F8VPN4|F8VPN4_MOUSE	F8VPN4	F8VPN4_MOUSE	Agl	Protein Agl	34060.6	38840.7	39405.4	34178	37181.3	34364.6	38189.7	39797.2	0.0270765	0.0405112	0.124362
sp|P60122|RUVB1_MOUSE	P60122	RUVB1_MOUSE	Ruvbl1	RuvB-like 1	37028.3	33262.2	34199.2	37184	33917.1	35074.7	40763.7	42628	0.0269056	0.0491621	0.273479
sp|P49025|CTRO_MOUSE	P49025	CTRO_MOUSE	Cit	Citron Rho-interacting kinase	37643.5	37148.4	31719.9	36917.8	36515.7	36894.8	34520.9	39285.8	0.0268959	-0.0969862	0.00776441
sp|Q9DCL9|PUR6_MOUSE	Q9DCL9	PUR6_MOUSE	Paics	Multifunctional protein ADE2	37965.2	36750.9	37729.8	40428.4	35651	37686.5	35265.1	31446.7	0.0268664	0.0918453	-0.136609
sp|P70362|UFD1_MOUSE	P70362	UFD1_MOUSE	Ufd1l	Ubiquitin fusion degradation protein 1 homolog	36993.7	37202.7	32257.1	34635	38878.6	33949.1	39164.7	38825.6	0.0268639	-0.122651	0.0988091
sp|Q9D8X2|CC124_MOUSE	Q9D8X2	CC124_MOUSE	Ccdc124	Coiled-coil domain-containing protein 124	42415.1	40599.6	39319.6	38149	38001.9	43496.8	31225.3	21982.2	0.0265893	-0.0731651	-0.615149
sp|Q9WVJ2|PSD13_MOUSE	Q9WVJ2	PSD13_MOUSE	Psmd13	26S proteasome non-ATPase regulatory subunit 13	34569.3	41190.7	32362.3	33475.6	38414.1	35966.3	35255.8	38104.7	0.0265144	-0.176004	-0.0199179
sp|Q8R5J9|PRAF3_MOUSE	Q8R5J9	PRAF3_MOUSE	Arl6ip5	PRA1 family protein 3	37831.6	38243.5	32783.8	34441.5	40181.1	34521.5	36762.4	37367	0.0262646	-0.152155	-0.0111124
sp|Q8K1X1|WDR11_MOUSE	Q8K1X1	WDR11_MOUSE	Wdr11	WD repeat-containing protein 11	40961.1	38172.3	26684.9	29236.2	40998.3	36710.8	31603	47712.7	0.0262045	-0.474688	0.0295243
sp|Q8BHL3|TB10B_MOUSE	Q8BHL3	TB10B_MOUSE	Tbc1d10b	TBC1 domain family member 10B	41524.6	35224.4	34586.8	35657.4	41672.4	33710.3	33214.4	37776	0.0259142	-0.101854	-0.086609
sp|Q9CZH3|PSMG3_MOUSE	Q9CZH3	PSMG3_MOUSE	Psmg3	Proteasome assembly chaperone 3	30398	39251.3	39235.4	35877.2	29971.7	38440.8	34289.2	51581.1	0.0258492	0.134793	0.327899
sp|P08775|RPB1_MOUSE	P08775	RPB1_MOUSE	Polr2a	DNA-directed RNA polymerase II subunit RPB1	36141.4	30364.2	31006.7	30785.9	36794.9	28534.5	54268.3	45078.1	0.025743	-0.0802997	0.604735
sp|P05201|AATC_MOUSE	P05201	AATC_MOUSE	Got1	Aspartate aminotransferase, cytoplasmic	35892.3	39625.5	43986.2	29237.3	37252.3	36936.3	35342.2	37592.2	0.0256208	-0.0188899	-0.0245989
sp|Q6PCP5|MFF_MOUSE	Q6PCP5	MFF_MOUSE	Mff	Mitochondrial fission factor	35779.8	39451.7	38864.1	40304	41527.8	32382.2	32371.9	27241.2	0.0255676	0.0991507	-0.310138
sp|Q2TPA8|HSDL2_MOUSE	Q2TPA8	HSDL2_MOUSE	Hsdl2	Hydroxysteroid dehydrogenase-like protein 2	42030.6	35152.4	36234.1	39048.4	37781.2	38046.9	31630.5	30470.2	0.0255513	-0.0104184	-0.288123
sp|Q3UIL6|PKHA7_MOUSE	Q3UIL6	PKHA7_MOUSE	Plekha7	Pleckstrin homology domain-containing family A member 7	36117.7	34259.2	35187.3	40240.5	35644.9	33498.4	33712.2	43330.3	0.0255129	0.125507	0.156065
sp|Q9ER88|RT29_MOUSE	Q9ER88	RT29_MOUSE	Dap3	28S ribosomal protein S29, mitochondrial	38797.7	38654.6	34369.6	36204.3	39431.3	36669.8	35438.3	33193.4	0.0253915	-0.108783	-0.149043
sp|Q9QYG0|NDRG2_MOUSE	Q9QYG0	NDRG2_MOUSE	Ndrg2	Protein NDRG2	38182.4	36956.2	37280.9	35324.5	36926.8	36903.4	34868.6	37622.1	0.0253454	-0.0241329	-0.0264154
sp|Q9WVL2|STAT2_MOUSE	Q9WVL2	STAT2_MOUSE	Stat2	Signal transducer and activator of transcription 2	37061.4	39135.3	35835	36900.2	36717.3	38158.7	37580.3	31727.9	0.0252247	-0.0418501	-0.111477
sp|B2RWS6|EP300_MOUSE	B2RWS6	EP300_MOUSE	Ep300	Histone acetyltransferase p300	31430.6	27551.4	34471.2	34060.3	29688.5	28276.1	54857.4	55423.3	0.0251044	0.241596	0.927936
sp|P28651|CAH8_MOUSE	P28651	CAH8_MOUSE	Ca8	Carbonic anhydrase-related protein	38967.8	38426.5	41135.8	37581.8	38232.7	37849	33885.3	30050.7	0.0246773	0.0491372	-0.250922
sp|P35700|PRDX1_MOUSE	P35700	PRDX1_MOUSE	Prdx1	Peroxiredoxin-1	34690.3	38509.5	33726.1	41046.4	33566.1	38424.4	33409.5	39865.7	0.0240313	0.0546997	0.025518
sp|Q8BHJ5|TBL1R_MOUSE	Q8BHJ5	TBL1R_MOUSE	Tbl1xr1	F-box-like/WD repeat-containing protein TBL1XR1	36596.4	32530.9	38686.7	33564.5	34263.8	33724.5	41054.8	42727.1	0.0239686	0.0877348	0.301351
sp|P70261|PALD_MOUSE	P70261	PALD_MOUSE	Pald1	Paladin	38565	33741.5	36320.4	41048.6	39893.9	31227.3	34393.7	36380.4	0.0238462	0.121476	-0.00705908
sp|Q0P678|ZCH18_MOUSE	Q0P678	ZCH18_MOUSE	Zc3h18	Zinc finger CCCH domain-containing protein 18	18918.7	18382	15921.4	14098.2	18075.4	18624	98407.7	116006	0.0234481	-0.289853	2.54657
sp|Q922B6|TRAF7_MOUSE	Q922B6	TRAF7_MOUSE	Traf7	E3 ubiquitin-protein ligase TRAF7	36601.1	35940.1	39701.2	38959.8	37687.4	33685.4	35139.3	34854.1	0.0234259	0.140273	-0.0281559
sp|O55222|ILK_MOUSE	O55222	ILK_MOUSE	Ilk	Integrin-linked protein kinase	35949.9	37338	43435	35396.3	35261.1	36853.8	33784.8	35865.1	0.0232758	0.12847	-0.050176
sp|Q64727|VINC_MOUSE	Q64727	VINC_MOUSE	Vcl	Vinculin	37939.4	38181	36478.5	36579.3	37613.6	37291.6	34386	31800	0.023217	-0.0360262	-0.17854
sp|Q9CQU0|TXD12_MOUSE	Q9CQU0	TXD12_MOUSE	Txndc12	Thioredoxin domain-containing protein 12	40058.6	35488.8	37304.2	41190.1	35302.2	39044.6	30413	28703.4	0.0231111	0.0783175	-0.33071
sp|A2A6Q5|CDC27_MOUSE	A2A6Q5	CDC27_MOUSE	Cdc27	Cell division cycle protein 27 homolog	33837.1	43863.7	35087.8	40680.8	35348.4	41145.6	28624.6	29590.8	0.0225834	-0.013746	-0.393945
sp|Q78JW9|UBFD1_MOUSE	Q78JW9	UBFD1_MOUSE	Ubfd1	Ubiquitin domain-containing protein UBFD1	32801.3	38104.9	38314	36420.5	32491	37329.3	39085.5	42016.8	0.0222671	0.0981278	0.216097
sp|Q9CQC6|BZW1_MOUSE	Q9CQC6	BZW1_MOUSE	Bzw1	Basic leucine zipper and W2 domain-containing protein 1	44439.5	32876.9	33425.5	34196.1	39146.3	37004.7	35415.1	30413.3	0.0219112	-0.17138	-0.210154
sp|P60335|PCBP1_MOUSE	P60335	PCBP1_MOUSE	Pcbp1	Poly(rC)-binding protein 1	34790.2	27465.4	35058.7	33765.9	31368.8	29953	50959	58823	0.0218048	0.166525	0.84017
sp|Q60631|GRB2_MOUSE	Q60631	GRB2_MOUSE	Grb2	Growth factor receptor-bound protein 2	36069.8	32881.8	31014.2	33437.7	33683.3	34237.1	41193.4	48297.3	0.0217392	-0.0756215	0.397892
tr|E9Q912|E9Q912_MOUSE	E9Q912	E9Q912_MOUSE	Rap1gds1	Protein Rap1gds1	37580.2	39927.8	42466.5	43794.4	33202.5	43155.9	29804.9	24441.5	0.0215579	0.175919	-0.49326
sp|Q9DAM7|CL023_MOUSE	Q9DAM7	CL023_MOUSE	Tmem263	Transmembrane protein 263	36454.9	37575.3	42984.1	39217.3	34826.8	38106.8	32461.3	32432.9	0.0215319	0.172581	-0.168494
sp|Q9QXZ0|MACF1_MOUSE	Q9QXZ0	MACF1_MOUSE	Macf1	Microtubule-actin cross-linking factor 1	35381.2	37294.5	36463.4	36854	34950.8	36651.3	35187.4	39505.3	0.02147	0.0341542	0.0609658
sp|O08848|RO60_MOUSE	O08848	RO60_MOUSE	Trove2	60 kDa SS-A/Ro ribonucleoprotein	37599.2	39369.4	37892.2	35660	34243.2	41592.3	31185.4	37631.8	0.0213978	-0.0441033	-0.140103
sp|Q9Z0H3|SNF5_MOUSE	Q9Z0H3	SNF5_MOUSE	Smarcb1	SWI/SNF-related matrix-associated actin-dependent regulator of chromatin subfamily B member 1	39186.7	31604.5	42322.7	38207.6	37845.2	31910.3	39477.2	34120.8	0.0212611	0.207222	0.0773594
sp|Q9D0E1|HNRPM_MOUSE	Q9D0E1	HNRPM_MOUSE	Hnrnpm	Heterogeneous nuclear ribonucleoprotein M	35278.8	22959.3	27658.6	18963.5	29678.1	27714.7	61880.6	72318.2	0.021093	-0.299858	1.22543
sp|Q9DAW6|PRP4_MOUSE	Q9DAW6	PRP4_MOUSE	Prpf4	U4/U6 small nuclear ribonucleoprotein Prp4	28456.7	37632.5	32017.2	29802	32448.9	32683.2	48056	59498.2	0.0210469	-0.0753115	0.723625
sp|P52293|IMA1_MOUSE	P52293	IMA1_MOUSE	Kpna2	Importin subunit alpha-1	34560.6	36927.2	41055.3	34307.5	34974.9	35477.7	37920.1	44971	0.0210441	0.0971988	0.234563
sp|P68040|GBLP_MOUSE	P68040	GBLP_MOUSE	Gnb2l1	Guanine nucleotide-binding protein subunit beta-2-like 1	40277.9	36063.2	37764.6	37469.6	38702.4	36559.2	30849.1	33113.5	0.0205461	-0.000525261	-0.234684
sp|P49722|PSA2_MOUSE	P49722	PSA2_MOUSE	Psma2	Proteasome subunit alpha type-2	40717.7	32199.7	41983	38462.4	36334.2	35569.2	35924.9	29066.8	0.0202018	0.16195	-0.145805
sp|Q9WV85|NDK3_MOUSE	Q9WV85	NDK3_MOUSE	Nme3	Nucleoside diphosphate kinase 3	38241.7	35159.3	41556.5	39323.5	38514.5	33877.3	35189.1	37055.8	0.0199726	0.159957	-0.00293044
sp|Q9CQF3|CPSF5_MOUSE	Q9CQF3	CPSF5_MOUSE	Nudt21	Cleavage and polyadenylation specificity factor subunit 5	25587.6	36241	23954.4	26040.4	27388.4	33594.8	50287.6	76809.3	0.019863	-0.286631	1.05945
sp|Q6GYP7|RGPA1_MOUSE	Q6GYP7	RGPA1_MOUSE	Ralgapa1	Ral GTPase-activating protein subunit alpha-1	40876.9	38463.7	36133.4	37115.9	35152.8	43110.2	31162	32350.8	0.0197276	-0.0955165	-0.301286
sp|O08788|DCTN1_MOUSE	O08788	DCTN1_MOUSE	Dctn1	Dynactin subunit 1	35812.5	36455.6	47563.3	38416.7	36399	34887.7	32227	34756.6	0.0197273	0.270369	-0.0898217
sp|Q8CBW3|ABI1_MOUSE	Q8CBW3	ABI1_MOUSE	Abi1	Abl interactor 1	38076.5	35339.8	37414.4	37872.6	36519	35904.7	38861.1	33062.2	0.0196373	0.0559379	-0.0100028
sp|Q9WUM4|COR1C_MOUSE	Q9WUM4	COR1C_MOUSE	Coro1c	Coronin-1C	35619.7	44128.4	34265.2	34177.6	34133.8	44539.8	29137.9	37068.6	0.0195701	-0.200982	-0.248905
tr|Q9EQC8|Q9EQC8_MOUSE	Q9EQC8	Q9EQC8_MOUSE	Prcc	Papillary renal cell carcinoma (Translocation-associated)	29408.9	33804.3	36112.3	28302.4	29305.7	33063.8	47711.8	79145.1	0.0193874	0.0465495	1.02429
sp|Q80U70|SUZ12_MOUSE	Q80U70	SUZ12_MOUSE	Suz12	Polycomb protein Suz12	34874.6	35834.9	34976.6	26817.9	35555	34217	45703.7	54111.4	0.0192545	-0.175171	0.51661
sp|Q8BRF7|SCFD1_MOUSE	Q8BRF7	SCFD1_MOUSE	Scfd1	Sec1 family domain-containing protein 1	34905.5	43459.6	36874.3	31421.2	41628.9	35708.1	39847.8	35143.8	0.0190526	-0.179366	-0.0444281
sp|Q8BSZ2|AP3S2_MOUSE	Q8BSZ2	AP3S2_MOUSE	Ap3s2	AP-3 complex subunit sigma-2	39665.1	38319.9	43735.7	34569.4	36652.8	40324	28671.4	39697.3	0.0187749	0.0246844	-0.171087
sp|Q811J3|IREB2_MOUSE	Q811J3	IREB2_MOUSE	Ireb2	Iron-responsive element-binding protein 2	34824.7	36363.2	37473.8	38441	32988.9	37283.9	40513.3	38593.9	0.0186656	0.111415	0.170844
sp|Q8R311|CTGE5_MOUSE	Q8R311	CTGE5_MOUSE	Ctage5	cTAGE family member 5	33483.8	35496.9	34367	43732.5	37085.6	31012.4	34883	29880.5	0.0185785	0.197698	-0.0724334
sp|P20029|GRP78_MOUSE	P20029	GRP78_MOUSE	Hspa5	78 kDa glucose-regulated protein	38065.2	40529.3	34411.5	36910	37659.8	39930.8	30713.2	30842.3	0.0185472	-0.121544	-0.333995
sp|Q9JHR7|IDE_MOUSE	Q9JHR7	IDE_MOUSE	Ide	Insulin-degrading enzyme	36017	38933.8	35029.2	35899	35509.2	38484.3	33527.9	43979.6	0.0185456	-0.0610393	0.0669376
sp|Q8CIE6|COPA_MOUSE	Q8CIE6	COPA_MOUSE	Copa	Coatomer subunit alpha	37529.3	41861.2	32933	35816.6	37665.8	40728.9	31803.6	33855.1	0.0182101	-0.189405	-0.255769
sp|Q9JLV1|BAG3_MOUSE	Q9JLV1	BAG3_MOUSE	Bag3	BAG family molecular chaperone regulator 3	37658.5	37613	40121.1	40491.9	35587.3	38753.2	31240.8	30149.6	0.0179583	0.116867	-0.276134
sp|P62196|PRS8_MOUSE	P62196	PRS8_MOUSE	Psmc5	26S protease regulatory subunit 8	41201.8	35432.9	38180.1	36610.7	38032.7	37654.2	32858	31129.9	0.0179544	-0.017182	-0.242243
sp|Q9D864|ARP6_MOUSE	Q9D864	ARP6_MOUSE	Actr6	Actin-related protein 6	40473.7	31411.2	42811.6	37694	34363.7	36640.9	36081.4	38673.2	0.0177749	0.181175	0.0742485
sp|Q9D1J3|SARNP_MOUSE	Q9D1J3	SARNP_MOUSE	Sarnp	SAP domain-containing ribonucleoprotein	27953.5	34086	30734.9	29402.6	29904.5	31381	47160.1	73405	0.0176395	-0.0272802	0.976193
sp|Q2TBE6|P4K2A_MOUSE	Q2TBE6	P4K2A_MOUSE	Pi4k2a	Phosphatidylinositol 4-kinase type 2-alpha	37524.3	37926.4	34781.9	37344.4	40381.5	34161	29897.5	33336.5	0.0174693	-0.0475375	-0.237363
sp|Q91WK5|GCSH_MOUSE	Q91WK5	GCSH_MOUSE	Gcsh	Glycine cleavage system H protein, mitochondrial	33637.2	40540.6	32121.3	43833.6	33228.2	40060.4	32010.2	40550.9	0.0173983	0.0515549	-0.014392
sp|Q61083|M3K2_MOUSE	Q61083	M3K2_MOUSE	Map3k2	Mitogen-activated protein kinase kinase kinase 2	43789	33255	33492	39032.4	40536.6	35586.4	35478.9	28597.8	0.0173494	-0.0698672	-0.248532
sp|Q8K1H1|TDRD7_MOUSE	Q8K1H1	TDRD7_MOUSE	Tdrd7	Tudor domain-containing protein 7	37653.3	29461.7	47297.5	39742.2	36411	29904	34350.3	40005.1	0.0172992	0.392337	0.165103
sp|Q9QZ08|NAGK_MOUSE	Q9QZ08	NAGK_MOUSE	Nagk	N-acetyl-D-glucosamine kinase	30753.6	42160.5	41988	39451.4	33356.8	38710.9	26680.2	47616.1	0.0168441	0.176373	0.0439375
sp|P16381|DDX3L_MOUSE	P16381	DDX3L_MOUSE	D1Pas1	Putative ATP-dependent RNA helicase Pl10	36541.1	33794.2	42751.2	37429.1	35116.3	34418	36158.9	38433.4	0.0165243	0.205523	0.101301
sp|Q8C4Y3|NELFB_MOUSE	Q8C4Y3	NELFB_MOUSE	Nelfb	Negative elongation factor B	43063.9	31802.3	39799.7	28775	41767	32247.3	42582.8	31393.9	0.0165096	-0.110127	-0.000733453
sp|Q8K0C4|CP51A_MOUSE	Q8K0C4	CP51A_MOUSE	Cyp51a1	Lanosterol 14-alpha demethylase	40492.4	34569.7	39677.9	40896.5	38501.3	35713.2	29598.5	30969.3	0.0163843	0.118621	-0.29315
tr|E9Q2H1|E9Q2H1_MOUSE	E9Q2H1	E9Q2H1_MOUSE	Ubr5	E3 ubiquitin-protein ligase UBR5	36756.3	34656.5	30147.1	31813.6	37440.4	33166.2	41032	47397.9	0.0163794	-0.18845	0.324731
sp|Q8CFI7|RPB2_MOUSE	Q8CFI7	RPB2_MOUSE	Polr2b	DNA-directed RNA polymerase II subunit RPB2	31168.4	31524.7	30457.5	30366	30895	31097.8	48344.5	67298.6	0.0162049	-0.0274724	0.899507
sp|A2A690|TANC2_MOUSE	A2A690	TANC2_MOUSE	Tanc2	Protein TANC2	32434.4	40353.5	50123.6	40024.6	30757	41220.9	33096.4	29309.7	0.0161459	0.324744	-0.205868
sp|Q03145|EPHA2_MOUSE	Q03145	EPHA2_MOUSE	Epha2	Ephrin type-A receptor 2	39988.2	31001.4	36834.5	34993.6	44325.6	25877.5	41773	32077.1	0.0160723	0.0330138	0.0730633
sp|Q6KAR6|EXOC3_MOUSE	Q6KAR6	EXOC3_MOUSE	Exoc3	Exocyst complex component 3	38951	36712.8	36806.8	43258.6	36775.3	38072.5	34370.6	25175.3	0.0156429	0.09722	-0.329958
sp|Q8CGZ0|CHERP_MOUSE	Q8CGZ0	CHERP_MOUSE	Cherp	Calcium homeostasis endoplasmic reticulum protein	19430.9	21826	25004.4	21591.1	22037.5	18793.7	83226.2	101731	0.0149623	0.190517	2.17945
sp|P51881|ADT2_MOUSE	P51881	ADT2_MOUSE	Slc25a5	ADP/ATP translocase 2	35982.7	35587	34385.6	39699.5	35916.6	34928.8	39089.4	39517.8	0.0146728	0.0645064	0.149987
sp|P60867|RS20_MOUSE	P60867	RS20_MOUSE	Rps20	40S ribosomal protein S20	38598.3	40140.4	31285.9	38979.6	38169.6	39774.1	31038.4	28119.1	0.014639	-0.149617	-0.397872
sp|Q6PDL0|DC1L2_MOUSE	Q6PDL0	DC1L2_MOUSE	Dync1li2	Cytoplasmic dynein 1 light intermediate chain 2	32115.4	45207.3	42328.1	30971	33253.3	43300.3	28162.4	39601.4	0.0144225	-0.0626745	-0.175956
sp|P48036|ANXA5_MOUSE	P48036	ANXA5_MOUSE	Anxa5	Annexin A5	38706.2	37894.9	39706.6	36412.7	38503.9	37355	30344.2	29059.1	0.0140466	0.00494483	-0.352777
sp|Q6PER3|MARE3_MOUSE	Q6PER3	MARE3_MOUSE	Mapre3	Microtubule-associated protein RP/EB family member 3	40862.1	36080	33453.2	35142.3	36160.8	40043.6	34254.9	45960	0.0138962	-0.151762	0.0739943
sp|Q9D7N9|APMAP_MOUSE	Q9D7N9	APMAP_MOUSE	Apmap	Adipocyte plasma membrane-associated protein	34230.6	41344.1	33729.4	39473.5	37151.2	37702.1	30182	35068.8	0.0138367	-0.0321646	-0.19807
sp|Q8BWJ3|KPB2_MOUSE	Q8BWJ3	KPB2_MOUSE	Phka2	Phosphorylase b kinase regulatory subunit alpha, liver isoform	38113.5	32712.7	36869.8	40275.3	36783.5	33369.2	32847.2	34073.5	0.0137828	0.137077	-0.0680455
sp|Q99LB6|MAT2B_MOUSE	Q99LB6	MAT2B_MOUSE	Mat2b	Methionine adenosyltransferase 2 subunit beta	35599.1	35087.4	39033.4	38099.6	36108.8	33942.2	34951.3	41685	0.0130289	0.138942	0.129622
sp|Q8BL97|SRSF7_MOUSE	Q8BL97	SRSF7_MOUSE	Srsf7	Serine/arginine-rich splicing factor 7	19879.4	19018.2	19799	18838.3	18642.9	19909.4	78088.9	124935	0.0128644	0.00317769	2.39676
sp|P97496|SMRC1_MOUSE	P97496	SMRC1_MOUSE	Smarcc1	SWI/SNF complex subunit SMARCC1	34435.9	37969	25152.8	24297.3	38101.1	33664.8	45093.8	55798.9	0.0127889	-0.537323	0.491451
sp|Q3TTA7|CBLB_MOUSE	Q3TTA7	CBLB_MOUSE	Cblb	E3 ubiquitin-protein ligase CBL-B	39801.8	34305.7	35941.2	38807.1	35139.5	38318.5	40865.2	31935.5	0.0127007	0.0251231	-0.0129667
sp|Q9DBN5|LONP2_MOUSE	Q9DBN5	LONP2_MOUSE	Lonp2	Lon protease homolog 2, peroxisomal	36549.4	34057	43152.7	39834.4	30721.6	39267.2	31394	30348.6	0.0126736	0.245762	-0.180859
sp|Q8C167|PPCEL_MOUSE	Q8C167	PPCEL_MOUSE	Prepl	Prolyl endopeptidase-like	37249.5	38352.1	38157.5	37952.4	36960.1	37989.7	36885.6	31135.4	0.0124906	0.0221574	-0.139945
sp|P17918|PCNA_MOUSE	P17918	PCNA_MOUSE	Pcna	Proliferating cell nuclear antigen	37532.6	37183.6	42966.7	33040.4	38295.2	35788.2	35500.1	30229.3	0.0122717	0.0369843	-0.172612
sp|Q4FK66|PR38A_MOUSE	Q4FK66	PR38A_MOUSE	Prpf38a	Pre-mRNA-splicing factor 38A	25709	27782.3	30964.8	22052.9	27660.5	25380	62042.4	95409.1	0.0122116	-0.000619295	1.56974
sp|Q8CI78|RMND1_MOUSE	Q8CI78	RMND1_MOUSE	Rmnd1	Required for meiotic nuclear division protein 1 homolog	39515.4	36253.2	39421.7	36756.2	39851.3	35281	31650.7	34818	0.0121684	0.0199382	-0.176759
sp|Q8K339|KIN17_MOUSE	Q8K339	KIN17_MOUSE	Kin	DNA/RNA-binding protein KIN17	31891.7	34460.6	35195.5	23642.7	34155.7	31639.7	50898.8	58135.6	0.0121581	-0.161234	0.728724
sp|Q8C166|CPNE1_MOUSE	Q8C166	CPNE1_MOUSE	Cpne1	Copine-1	39875.4	33865.2	45002	35641.7	35378.1	37749.7	40957.2	32469.1	0.0120419	0.141143	0.00587888
sp|Q9D0N7|CAF1B_MOUSE	Q9D0N7	CAF1B_MOUSE	Chaf1b	Chromatin assembly factor 1 subunit B	31297.1	37265.6	38350.6	34847.6	35503	32493.8	42511.4	43100.7	0.0119551	0.106342	0.332346
tr|A2BDX0|A2BDX0_MOUSE	A2BDX0	A2BDX0_MOUSE	Adnp	Activity-dependent neuroprotector homeobox protein	41476	32628.4	39605.9	37916.5	34851.9	38645.7	35587.9	34991.4	0.0118642	0.0769162	-0.0584514
sp|P39447|ZO1_MOUSE	P39447	ZO1_MOUSE	Tjp1	Tight junction protein ZO-1	33697	38415.6	30216.4	31549.5	35721.5	35805.2	41080	47774	0.0117702	-0.211673	0.312954
sp|O88545|CSN6_MOUSE	O88545	CSN6_MOUSE	Cops6	COP9 signalosome complex subunit 6	43921.9	39489.3	34072	21484.3	44970.3	37792.1	39559.8	38573	0.0112665	-0.575027	-0.0830459
sp|Q9EPC1|PARVA_MOUSE	Q9EPC1	PARVA_MOUSE	Parva	Alpha-parvin	28895.8	46711.2	45454.1	35451.9	37145.6	37877.7	27498.7	39551.4	0.0111824	0.108911	-0.162097
sp|P59999|ARPC4_MOUSE	P59999	ARPC4_MOUSE	Arpc4	Actin-related protein 2/3 complex subunit 4	42755.5	34807.5	40272.1	31159.9	45639.5	31324.6	32171.2	27973.9	0.0111811	-0.107614	-0.355739
sp|O88811|STAM2_MOUSE	O88811	STAM2_MOUSE	Stam2	Signal transducing adapter molecule 2	43545.3	34275.1	40768.5	36441.5	38531.7	38689.6	35023.8	29635.8	0.0111495	-0.000210666	-0.256132
sp|Q8JZQ9|EIF3B_MOUSE	Q8JZQ9	EIF3B_MOUSE	Eif3b	Eukaryotic translation initiation factor 3 subunit B	38633.8	35232.6	39316.9	34922.3	37204	36104.5	35645	37759.2	0.0109394	0.0182004	0.00188308
sp|Q91V81|RBM42_MOUSE	Q91V81	RBM42_MOUSE	Rbm42	RNA-binding protein 42	31787.7	24682.7	28164.5	31656.4	25841	30213.3	56470.2	76770.5	0.0106701	0.0938238	1.24914
sp|Q99LF4|RTCB_MOUSE	Q99LF4	RTCB_MOUSE	Rtcb	tRNA-splicing ligase RtcB homolog	32074.6	35977.7	31943.1	33123.6	31379.8	36176.6	39358.9	56704.9	0.0105506	-0.0541719	0.5079
sp|O55106|STRN_MOUSE	O55106	STRN_MOUSE	Strn	Striatin	33593.1	44836.1	33884.2	37330.2	39571.3	38298.2	30341.2	29849.7	0.0103315	-0.128888	-0.371513
sp|Q9JIF0|ANM1_MOUSE	Q9JIF0	ANM1_MOUSE	Prmt1	Protein arginine N-methyltransferase 1	34561.4	31454.2	25843.1	29842.3	33802.5	31745	44658.5	66627.8	0.0102676	-0.235239	0.763665
sp|Q8BX09|RBBP5_MOUSE	Q8BX09	RBBP5_MOUSE	Rbbp5	Retinoblastoma-binding protein 5	38142	29781.9	39662	31515.5	38330.8	29112	42598.6	43709.8	0.0102542	0.077756	0.355835
tr|Q5XJF6|Q5XJF6_MOUSE	Q5XJF6	Q5XJF6_MOUSE	Rpl10a	Ribosomal protein	39845.2	37924.7	34040.7	39793.1	38055.7	39180.2	31106.3	28107.5	0.00994143	-0.0649902	-0.383339
sp|Q9CZY3|UB2V1_MOUSE	Q9CZY3	UB2V1_MOUSE	Ube2v1	Ubiquitin-conjugating enzyme E2 variant 1	39964.9	35395.1	41037.1	35454.6	39244.4	35599.9	37004.8	32237.7	0.00990526	0.0314097	-0.112236
sp|Q60996|2A5G_MOUSE	Q60996	2A5G_MOUSE	Ppp2r5c	Serine/threonine-protein phosphatase 2A 56 kDa regulatory subunit gamma isoform	34957.9	38577	35112	34357.5	37976.2	35062	35435.3	44397.3	0.00977745	-0.0722702	0.128327
sp|P46061|RAGP1_MOUSE	P46061	RAGP1_MOUSE	Rangap1	Ran GTPase-activating protein 1	40500.8	38136.2	35709.4	37211.8	39897.7	38213.3	31393.9	29521.9	0.00968346	-0.0991866	-0.358709
sp|Q8R016|BLMH_MOUSE	Q8R016	BLMH_MOUSE	Blmh	Bleomycin hydrolase	34349.7	38303.5	58841	32013.6	36455.5	35719.4	33201.2	30847.7	0.00953093	0.332064	-0.172322
sp|Q8VDR9|DOCK6_MOUSE	Q8VDR9	DOCK6_MOUSE	Dock6	Dedicator of cytokinesis protein 6	38161.7	37163.2	30156	39850	38539.1	36292.6	35993.5	27195	0.0094772	-0.0961703	-0.243986
sp|P70700|RPA2_MOUSE	P70700	RPA2_MOUSE	Polr1b	DNA-directed RNA polymerase I subunit RPA2	37360.1	37708.6	36196	35268.2	35346.6	39235	36521.9	38585.8	0.00939134	-0.0616004	0.0101409
sp|Q9WU28|PFD5_MOUSE	Q9WU28	PFD5_MOUSE	Pfdn5	Prefoldin subunit 5	37516.9	40258.3	31801.3	38849.5	38089	39208.2	31277.2	30665.9	0.00889508	-0.12971	-0.319473
sp|P70296|PEBP1_MOUSE	P70296	PEBP1_MOUSE	Pebp1	Phosphatidylethanolamine-binding protein 1	37668.5	30571.9	29778.2	37836.2	33236.5	34601.9	40056.4	48380.4	0.00852572	-0.0047704	0.382545
sp|Q99L47|F10A1_MOUSE	Q99L47	F10A1_MOUSE	St13	Hsc70-interacting protein	36808.3	40496.1	38040	33802.8	38124.1	38732.7	27810.2	35707.6	0.00838002	-0.0973281	-0.27501
sp|P23116|EIF3A_MOUSE	P23116	EIF3A_MOUSE	Eif3a	Eukaryotic translation initiation factor 3 subunit A	36582	38551.1	41218.5	37427	36407.2	38315.1	32190.4	31314.3	0.00791135	0.0738279	-0.234673
sp|Q8CG48|SMC2_MOUSE	Q8CG48	SMC2_MOUSE	Smc2	Structural maintenance of chromosomes protein 2	38057.2	37192.4	35040.4	34581.1	38122.7	36722.4	36972	37273.2	0.00777608	-0.104374	-0.0116089
sp|P62915|TF2B_MOUSE	P62915	TF2B_MOUSE	Gtf2b	Transcription initiation factor IIB	35707	36724	33188.5	32856.1	33268.7	38774.1	42055	47182	0.00775204	-0.125415	0.308786
sp|Q9QYB1|CLIC4_MOUSE	Q9QYB1	CLIC4_MOUSE	Clic4	Chloride intracellular channel protein 4	38054.9	35199.3	38099.3	36487.8	35185.9	37676.1	38272	36412.3	0.00774407	0.0337596	0.0356399
sp|P48722|HS74L_MOUSE	P48722	HS74L_MOUSE	Hspa4l	Heat shock 70 kDa protein 4L	35242.1	34222.3	42953.5	33016.6	34496.1	34612	43751.4	41657.9	0.00741874	0.136577	0.30554
sp|Q91WE6|CDKAL_MOUSE	Q91WE6	CDKAL_MOUSE	Cdkal1	Threonylcarbamoyladenosine tRNA methylthiotransferase	37242.1	40609.2	31379.8	41658.2	36773.9	40685.9	29916.6	29977.6	0.00727152	-0.0848014	-0.371032
sp|Q9DCH4|EIF3F_MOUSE	Q9DCH4	EIF3F_MOUSE	Eif3f	Eukaryotic translation initiation factor 3 subunit F	38400.2	39205.5	40553.3	34267.7	38122.9	39101.8	32681.9	29660.3	0.00709988	-0.0456191	-0.308855
sp|Q6ZPY7|KDM3B_MOUSE	Q6ZPY7	KDM3B_MOUSE	Kdm3b	Lysine-specific demethylase 3B	37219.1	34092	34088.4	33523.3	39004.4	31968.2	41179.6	38113.2	0.00686364	-0.0699901	0.159927
sp|Q62189|SNRPA_MOUSE	Q62189	SNRPA_MOUSE	Snrpa	U1 small nuclear ribonucleoprotein A	16891.5	12537.8	16706.3	12405.3	17763.1	11527.7	110221	126773	0.00680132	-0.00885913	3.01632
sp|Q8BTV2|CPSF7_MOUSE	Q8BTV2	CPSF7_MOUSE	Cpsf7	Cleavage and polyadenylation specificity factor subunit 7	27198.6	29195.9	31578	26179.8	30532.9	25600.4	62715.7	70899.4	0.00669913	0.0411607	1.25116
sp|Q08943|SSRP1_MOUSE	Q08943	SSRP1_MOUSE	Ssrp1	FACT complex subunit SSRP1	39115.1	35322.3	36715.8	34600.7	38381.5	35723.8	38132.4	36425.7	0.00645296	-0.0553392	0.00878935
sp|Q60865|CAPR1_MOUSE	Q60865	CAPR1_MOUSE	Caprin1	Caprin-1	39650.3	31160.8	42044.5	29885	39968.5	30532.4	42299.2	33776.7	0.00633293	0.028942	0.109798
sp|P11031|TCP4_MOUSE	P11031	TCP4_MOUSE	Sub1	Activated RNA polymerase II transcriptional coactivator p15	37190.1	29865.7	38767.6	22587.5	41066.7	25697.4	57222.9	45694.3	0.00629054	-0.121889	0.624339
sp|Q8VHE0|SEC63_MOUSE	Q8VHE0	SEC63_MOUSE	Sec63	Translocation protein SEC63 homolog	35955.5	41067.1	30935	39537	37021.6	39670.9	32919.9	28592.1	0.00619512	-0.122034	-0.318218
sp|P06745|G6PI_MOUSE	P06745	G6PI_MOUSE	Gpi	Glucose-6-phosphate isomerase	39032.1	40712.3	34625.3	29935.7	40774	38630	37054.5	35023.1	0.00617257	-0.298549	-0.13966
sp|Q61035|SYHC_MOUSE	Q61035	SYHC_MOUSE	Hars	Histidine--tRNA ligase, cytoplasmic	41408.7	36675.8	50113.5	25952.3	41584.2	36219.2	33041.1	33010.2	0.00520182	-0.032585	-0.236249
sp|Q9R0U0|SRS10_MOUSE	Q9R0U0	SRS10_MOUSE	Srsf10	Serine/arginine-rich splicing factor 10	17861.3	14975.3	18191.4	16278.8	17099.1	15620.6	90520.8	128772	0.0051487	0.0751894	2.74463
sp|Q9ES97|RTN3_MOUSE	Q9ES97	RTN3_MOUSE	Rtn3	Reticulon-3	38793.6	39558.7	34689.5	34353	40998.9	37080.3	34506.7	30093.7	0.00503642	-0.177452	-0.273396
sp|P61089|UBE2N_MOUSE	P61089	UBE2N_MOUSE	Ube2n	Ubiquitin-conjugating enzyme E2 N	32968.7	41161.7	45667.1	38897.1	33409.9	40473.3	31383.2	32592.7	0.00481858	0.194802	-0.207718
sp|Q8C170|MYO9A_MOUSE	Q8C170	MYO9A_MOUSE	Myo9a	Unconventional myosin-IXa	33905.1	38629.3	33742.7	41721.3	36017.3	36278	33895.1	29952.3	0.00476331	0.0618869	-0.179274
sp|Q9CXS4|CENPV_MOUSE	Q9CXS4	CENPV_MOUSE	Cenpv	Centromere protein V	42516.3	32437.4	28059.6	43994.4	35210	39516.7	32816.3	31838.3	0.0043761	-0.0525459	-0.208871
sp|Q76MZ3|2AAA_MOUSE	Q76MZ3	2AAA_MOUSE	Ppp2r1a	Serine/threonine-protein phosphatase 2A 65 kDa regulatory subunit A alpha isoform	39494.8	35353	37584.8	35082.1	39368.5	35257	36167.1	32904.3	0.00429174	-0.0383691	-0.11158
sp|Q9QZD9|EIF3I_MOUSE	Q9QZD9	EIF3I_MOUSE	Eif3i	Eukaryotic translation initiation factor 3 subunit I	34935.3	47910.1	25450.8	35424.7	36524.5	46083.9	28600.3	35523.8	0.00413145	-0.440428	-0.365421
sp|Q8C1Y8|CCZ1_MOUSE	Q8C1Y8	CCZ1_MOUSE	Ccz1	Vacuolar fusion protein CCZ1 homolog	37781.7	31400.8	37692	35447.6	34618	34369.8	42028.3	36141.1	0.00406465	0.0843112	0.180263
sp|P61971|NTF2_MOUSE	P61971	NTF2_MOUSE	Nutf2	Nuclear transport factor 2	36237.5	37660.8	45581.9	32798.5	35779	37931.1	32647.7	34462.3	0.00367994	0.088631	-0.135332
sp|Q9QUI0|RHOA_MOUSE	Q9QUI0	RHOA_MOUSE	Rhoa	Transforming protein RhoA	34997.3	41782.2	39913.7	34805.1	39778.2	36810.9	32774.2	28184.2	0.00358181	-0.0356679	-0.329315
tr|Q8VCQ8|Q8VCQ8_MOUSE	Q8VCQ8	Q8VCQ8_MOUSE	Cald1	Caldesmon 1	36073.6	43790.7	28116.1	33577.7	39255.9	40411.4	31145.6	30300.9	0.00356154	-0.368864	-0.374658
sp|Q9DCR2|AP3S1_MOUSE	Q9DCR2	AP3S1_MOUSE	Ap3s1	AP-3 complex subunit sigma-1	40017.7	38820.5	35361.4	37488.6	39277.7	39382.3	28068.2	30031	0.00326581	-0.110701	-0.437112
tr|E9Q1M6|E9Q1M6_MOUSE	E9Q1M6	E9Q1M6_MOUSE	Ankhd1	Protein Ankhd1	41693.3	35124.8	38285	39459	35773.1	40873.8	27636.5	32346.6	0.00321863	0.0205047	-0.353672
sp|P97371|PSME1_MOUSE	P97371	PSME1_MOUSE	Psme1	Proteasome activator complex subunit 1	31129.3	42841.3	31399.8	48612.7	31568.3	42239.4	28310.7	31883.6	0.00317996	0.116456	-0.294145
sp|O35326|SRSF5_MOUSE	O35326	SRSF5_MOUSE	Srsf5	Serine/arginine-rich splicing factor 5	19746.8	17733.4	17311	16047.8	19609.6	17791.2	96452.1	112947	0.0030565	-0.165001	2.48511
sp|O08759|UBE3A_MOUSE	O08759	UBE3A_MOUSE	Ube3a	Ubiquitin-protein ligase E3A	38585.9	37302.2	36076.4	38796.8	38100.2	37629.6	35621.9	27746.2	0.00301082	-0.0164115	-0.257106
tr|G3X972|G3X972_MOUSE	G3X972	G3X972_MOUSE	Sec24c	Protein Sec24c	36894.9	41366.9	35677.2	34025.4	39473.4	38626.1	30284.2	33205.8	0.00299524	-0.164098	-0.298782
sp|P52479|UBP10_MOUSE	P52479	UBP10_MOUSE	Usp10	Ubiquitin carboxyl-terminal hydrolase 10	37831.1	42676.9	26669.5	36958.1	44973.6	35373.9	32381.2	32109	0.00287752	-0.336601	-0.317175
sp|Q80XI3|IF4G3_MOUSE	Q80XI3	IF4G3_MOUSE	Eif4g3	Eukaryotic translation initiation factor 4 gamma 3	35993.5	39044.8	32620.8	36460.8	34407.9	40486	36414.7	47578.3	0.00277977	-0.116549	0.16542
sp|Q8BGT7|SPF30_MOUSE	Q8BGT7	SPF30_MOUSE	Smndc1	Survival of motor neuron-related-splicing factor 30	31070	22849.4	25552.2	23945.7	26897	26927.8	69483.8	77301.7	0.0025346	-0.120903	1.44737
sp|O35943|FRDA_MOUSE	O35943	FRDA_MOUSE	Fxn	Frataxin, mitochondrial	45546.8	27828.8	46110.5	33223.8	39374.8	33893.1	38386.8	31959.3	0.0021201	0.114764	-0.0587097
sp|Q91WM1|STRBP_MOUSE	Q91WM1	STRBP_MOUSE	Strbp	Spermatid perinuclear RNA-binding protein	27381.6	33819.3	29876.3	34571.8	25241.2	35871.8	47819.2	67484.4	0.00207474	0.0766589	0.915888
sp|Q9CQ40|RM49_MOUSE	Q9CQ40	RM49_MOUSE	Mrpl49	39S ribosomal protein L49, mitochondrial	33581.3	28157.8	43120.8	62376.7	32834.6	28818.7	31427.8	24440.9	0.00200623	0.774959	-0.142137
sp|Q8R3S6|EXOC1_MOUSE	Q8R3S6	EXOC1_MOUSE	Exoc1	Exocyst complex component 1	40746.5	35860	45847.3	36647.8	35399.3	41102.5	35476.3	26158.3	0.00197264	0.108814	-0.311753
sp|O70551|SRPK1_MOUSE	O70551	SRPK1_MOUSE	Srpk1	SRSF protein kinase 1	34484.5	35245	28398.9	32638.3	35346.1	34315.7	43072	55289.9	0.00140161	-0.190678	0.497731
sp|Q60668|HNRPD_MOUSE	Q60668	HNRPD_MOUSE	Hnrnpd	Heterogeneous nuclear ribonucleoprotein D0	30974.8	26499.9	29139.3	27072.4	30012.8	27412.4	58531.6	70310.5	0.00124258	-0.0308134	1.16585
sp|Q6ZQ88|KDM1A_MOUSE	Q6ZQ88	KDM1A_MOUSE	Kdm1a	Lysine-specific histone demethylase 1A	35144.3	33917.8	33573.8	38459.8	33840.5	35164.8	39530.2	41944.5	0.00118754	0.0619631	0.239646
sp|Q3THK3|T2FA_MOUSE	Q3THK3	T2FA_MOUSE	Gtf2f1	General transcription factor IIF subunit 1	38924.1	32741.4	39728.6	41489.6	35993.5	35638.4	32820.8	33556.1	0.000675262	0.1812	-0.109924
sp|Q9JKX6|NUDT5_MOUSE	Q9JKX6	NUDT5_MOUSE	Nudt5	ADP-sugar pyrophosphatase	32417.9	40978.9	35748.3	39419.7	35770.6	37602.2	35973.3	26071.8	0.000469993	0.0348713	-0.241932
sp|Q91VH2|SNX9_MOUSE	Q91VH2	SNX9_MOUSE	Snx9	Sorting nexin-9	33924.8	42796.2	33808	39228.9	37440.5	39307.5	29431.1	35629.7	-0.000509195	-0.0715028	-0.238341
sp|P27546|MAP4_MOUSE	P27546	MAP4_MOUSE	Map4	Microtubule-associated protein 4	43284.1	32399.7	32141.6	37260.7	40822.3	34890.6	35749.4	29554.8	-0.000555391	-0.125556	-0.213362
sp|Q91W39|NCOA5_MOUSE	Q91W39	NCOA5_MOUSE	Ncoa5	Nuclear receptor coactivator 5	24937.4	17549.3	19649.8	18105.5	21241.5	21273.5	82952.2	111650	-0.000962428	-0.171293	2.19449
sp|Q9WVG6|CARM1_MOUSE	Q9WVG6	CARM1_MOUSE	Carm1	Histone-arginine methyltransferase CARM1	36827.2	33535.7	31120.3	29995.3	37713.7	32696.5	44438.6	49332.8	-0.000970017	-0.204246	0.413363
sp|P21107-2|TPM3_MOUSE	P21107-2	TPM3_MOUSE	Tpm3	Isoform 2 of Tropomyosin alpha-3 chain	42102.7	33872.2	38150.1	38710.3	38324.5	37706.8	31369.6	31215.1	-0.0010709	0.0156458	-0.280784
sp|Q80X41|VRK1_MOUSE	Q80X41	VRK1_MOUSE	Vrk1	Serine/threonine-protein kinase VRK1	35162.8	39805.3	47595.9	30817.3	36538.3	38495.3	39257	37596.8	-0.00126153	0.0635593	0.0345792
sp|O35286|DHX15_MOUSE	O35286	DHX15_MOUSE	Dhx15	Putative pre-mRNA-splicing factor ATP-dependent RNA helicase DHX15	27070.7	32754	32789.6	30822.7	29566.2	30336.1	51000.3	63359.4	-0.00187057	0.0866921	0.932894
sp|Q6P5E4|UGGG1_MOUSE	Q6P5E4	UGGG1_MOUSE	Uggt1	UDP-glucose:glycoprotein glucosyltransferase 1	34462.4	43531.3	27250.2	31887.6	41676.4	36431	34862.4	36641.4	-0.00210288	-0.401381	-0.127439
sp|P35980|RL18_MOUSE	P35980	RL18_MOUSE	Rpl18	60S ribosomal protein L18	38605.2	38834.6	36524.7	39962.2	36981.9	40589	31578.9	29507.1	-0.00244054	-0.020303	-0.344674
sp|Q921G8|GCP2_MOUSE	Q921G8	GCP2_MOUSE	Tubgcp2	Gamma-tubulin complex component 2	37300.5	36634.8	40692.9	34284.2	41587.1	32475.6	37018.5	29140.6	-0.00248554	0.0177018	-0.162808
sp|Q9DBA9|TF2H1_MOUSE	Q9DBA9	TF2H1_MOUSE	Gtf2h1	General transcription factor IIH subunit 1	33181.4	32182.6	36074	33240.4	31734.8	33744.8	44751.2	53738.8	-0.00255005	0.0821098	0.588931
sp|Q99N94|RM09_MOUSE	Q99N94	RM09_MOUSE	Mrpl9	39S ribosomal protein L9, mitochondrial	18114.1	31160.5	42996.3	89416.9	22061.4	27301.5	19543.6	32977.3	-0.00258184	1.42355	0.0894647
sp|Q60972|RBBP4_MOUSE	Q60972	RBBP4_MOUSE	Rbbp4	Histone-binding protein RBBP4	36407.8	34156.6	34674.5	39102.7	33270.2	37424.6	37322.5	41338.7	-0.0026631	0.0615709	0.154048
sp|A6H6A9|RBG1L_MOUSE	A6H6A9	RBG1L_MOUSE	Rabgap1l	Rab GTPase-activating protein 1-like	40648.6	35711.1	41726.2	26504.1	39368.9	37152.7	41720.3	29187.9	-0.00305651	-0.165453	-0.109915
sp|Q61753|SERA_MOUSE	Q61753	SERA_MOUSE	Phgdh	D-3-phosphoglycerate dehydrogenase	38442.7	37402.1	34516.8	41803.7	36470.3	39550	30298.9	30487.3	-0.00333546	0.00568491	-0.322642
sp|O08583|THOC4_MOUSE	O08583	THOC4_MOUSE	Alyref	THO complex subunit 4	26312.4	32572	24120.9	26732.1	26600.5	32422.4	48328.8	95456.9	-0.0033898	-0.214945	1.28457
sp|P42230|STA5A_MOUSE	P42230	STA5A_MOUSE	Stat5a	Signal transducer and activator of transcription 5A	43369.4	34811.8	40287.2	38424.3	36776.8	41595.3	36113.6	28567.7	-0.00351776	0.00623376	-0.276991
sp|O55029|COPB2_MOUSE	O55029	COPB2_MOUSE	Copb2	Coatomer subunit beta'	39702.7	35404.7	35312.1	39156.6	38652.8	36642.3	33710.6	28142	-0.00360179	-0.0159225	-0.283722
sp|Q9WU84|CCS_MOUSE	Q9WU84	CCS_MOUSE	Ccs	Copper chaperone for superoxide dismutase	36478.4	36958	36809.9	36665.6	37148.6	36476.7	39340	34984.3	-0.00370602	-0.00293711	0.0136329
sp|Q8BTS4|NUP54_MOUSE	Q8BTS4	NUP54_MOUSE	Nup54	Nuclear pore complex protein Nup54	31443.4	41360	36869.8	42469.1	34951.8	38041.2	29651.5	40203.3	-0.00375127	0.120271	-0.063398
sp|Q6PFD9|NUP98_MOUSE	Q6PFD9	NUP98_MOUSE	Nup98	Nuclear pore complex protein Nup98-Nup96	39730.9	36470.2	36031.1	36923.8	37460.7	38939.1	34777.7	30306.3	-0.00375736	-0.0665629	-0.231263
sp|Q99N91|RM34_MOUSE	Q99N91	RM34_MOUSE	Mrpl34	39S ribosomal protein L34, mitochondrial	34508.5	31016.7	43087.1	57062.4	31649.8	34050.7	30659.5	28506.5	-0.00385442	0.60818	-0.151135
sp|P14824|ANXA6_MOUSE	P14824	ANXA6_MOUSE	Anxa6	Annexin A6	41358.3	34305.1	41373.2	35873.2	40585.7	35293.8	32705.1	31877	-0.0041129	0.0257601	-0.232575
sp|O08547|SC22B_MOUSE	O08547	SC22B_MOUSE	Sec22b	Vesicle-trafficking protein SEC22b	38903.9	37672	29843.1	38572.7	39807.4	37008.2	34182.7	29711	-0.00451018	-0.167072	-0.265725
sp|A8C756|THADA_MOUSE	A8C756	THADA_MOUSE	Thada	Thyroid adenoma-associated protein homolog	35942.4	39415.4	39371.6	35365.2	35625.7	39972.3	31375.2	39304.1	-0.00459133	-0.01653	-0.0970611
sp|P28740|KIF2A_MOUSE	P28740	KIF2A_MOUSE	Kif2a	Kinesin-like protein KIF2A	37536.2	33388.9	31826.2	33963.3	35631.1	35522.6	37413.3	43051.9	-0.00464166	-0.113083	0.177425
sp|O70194|EIF3D_MOUSE	O70194	EIF3D_MOUSE	Eif3d	Eukaryotic translation initiation factor 3 subunit D	39471.6	36021	37911.2	34347	39651.4	36091.4	38694.4	30561.5	-0.00477258	-0.0679472	-0.129172
sp|Q9D855|QCR7_MOUSE	Q9D855	QCR7_MOUSE	Uqcrb	Cytochrome b-c1 complex subunit 7	28465.5	36932.2	34171.9	41040	29560.9	36057.2	48909.5	43593.7	-0.0048543	0.196866	0.495409
sp|Q9DBR7|MYPT1_MOUSE	Q9DBR7	MYPT1_MOUSE	Ppp1r12a	Protein phosphatase 1 regulatory subunit 12A	35856.1	38724.8	36616.5	36111.6	34217.8	40614.6	35020.6	38142.7	-0.00485769	-0.0411513	-0.0325421
sp|Q62448|IF4G2_MOUSE	Q62448	IF4G2_MOUSE	Eif4g2	Eukaryotic translation initiation factor 4 gamma 2	38807.8	36579.8	36433.9	36715.3	36484.2	39159.5	33372.9	32064.1	-0.00489312	-0.0483775	-0.209114
sp|Q9JLV6|PNKP_MOUSE	Q9JLV6	PNKP_MOUSE	Pnkp	Bifunctional polynucleotide phosphatase/kinase	32396.3	32815.4	29074	33860.5	32986.9	32448.4	45239.5	47956.8	-0.00493661	-0.0562159	0.510204
tr|Q8K1G9|Q8K1G9_MOUSE	Q8K1G9	Q8K1G9_MOUSE	Dhx35	DEAH (Asp-Glu-Ala-His) box polypeptide 35	30691.5	29892.9	27842.2	29787.5	29716.7	31086.6	59149.3	61331.8	-0.00520273	-0.0773356	0.986587
sp|Q922V4|PLRG1_MOUSE	Q922V4	PLRG1_MOUSE	Plrg1	Pleiotropic regulator 1	20800.8	24681.8	22962.6	22521.8	22323.9	23324.4	76954.7	94044	-0.00524711	-0.00518704	1.90535
sp|Q9Z1M8|RED_MOUSE	Q9Z1M8	RED_MOUSE	Ik	Protein Red	26039.4	28172.9	22670	28869.7	25748.6	28664.1	57732.8	87509.6	-0.00532355	-0.078259	1.41645
sp|Q99JR8|SMRD2_MOUSE	Q99JR8	SMRD2_MOUSE	Smarcd2	SWI/SNF-related matrix-associated actin-dependent regulator of chromatin subfamily D member 2	34829	35592.6	34012.4	37667.5	32292	38395.8	36807.3	51185.7	-0.00544316	0.0201077	0.315929
sp|P63001|RAC1_MOUSE	P63001	RAC1_MOUSE	Rac1	Ras-related C3 botulinum toxin substrate 1	34961.6	39741.2	39571.5	39335.7	37621.4	37406.3	30346.4	26627.9	-0.0062589	0.0727363	-0.397109
sp|Q9Z0Z3|SKP2_MOUSE	Q9Z0Z3	SKP2_MOUSE	Skp2	S-phase kinase-associated protein 2	38864.3	35025	34612.7	34991.3	34469.2	39741.7	34775.9	43613.3	-0.00626575	-0.0924612	0.0790232
sp|Q9CYZ2|TPD54_MOUSE	Q9CYZ2	TPD54_MOUSE	Tpd52l2	Tumor protein D54	37272.9	37329.8	49991.7	35561.6	36146.3	38786.8	28420	32991	-0.00637576	0.191219	-0.287107
sp|Q8BHN3|GANAB_MOUSE	Q8BHN3	GANAB_MOUSE	Ganab	Neutral alpha-glucosidase AB	39691.4	35223.4	41156.6	40174.5	36951.2	38296.5	27740	33277	-0.0063957	0.11216	-0.302435
sp|Q9CQQ4|GEMI2_MOUSE	Q9CQQ4	GEMI2_MOUSE	Gemin2	Gem-associated protein 2	15872.9	14289.4	14697.7	13168.3	14892.5	15406	96396.3	152418	-0.0064977	-0.12074	3.03776
sp|P45481|CBP_MOUSE	P45481	CBP_MOUSE	Crebbp	CREB-binding protein	27441.8	36156.9	48104.7	33235.9	29940.4	33946.5	39040.5	57940.5	-0.00652107	0.348455	0.602182
sp|P51432|PLCB3_MOUSE	P51432	PLCB3_MOUSE	Plcb3	1-phosphatidylinositol 4,5-bisphosphate phosphodiesterase beta-3	37931.2	36784.7	42342.7	43061.7	33803.6	41254.3	28831.3	25746.7	-0.0065878	0.186307	-0.459683
sp|P68369|TBA1A_MOUSE	P68369	TBA1A_MOUSE	Tuba1a	Tubulin alpha-1A chain	38133.3	37551.5	32353.8	40916.1	35057.4	40979.8	33321.3	33551	-0.00670445	-0.0534857	-0.1853
sp|Q6P1B1|XPP1_MOUSE	Q6P1B1	XPP1_MOUSE	Xpnpep1	Xaa-Pro aminopeptidase 1	33552.1	34958	45958.5	35257.5	33565.8	35266.7	38865.2	39934.7	-0.00677208	0.238674	0.195105
tr|D3Z5F7|D3Z5F7_MOUSE	D3Z5F7	D3Z5F7_MOUSE	Gm20521	Protein Gm20521	33277.2	29343.5	31469.2	34527	30145.9	32781.5	44854.4	58626.4	-0.00704685	0.0686964	0.717605
sp|P99024|TBB5_MOUSE	P99024	TBB5_MOUSE	Tubb5	Tubulin beta-5 chain	35496.2	41936.7	30719.5	40087.8	33752.6	44062.6	29311.4	32756.3	-0.00710713	-0.136155	-0.32621
sp|O70435|PSA3_MOUSE	O70435	PSA3_MOUSE	Psma3	Proteasome subunit alpha type-3	41865.4	30658.8	43933.3	37581.1	38125.2	34776.6	36383.8	28138.7	-0.00749265	0.161099	-0.176152
sp|O09044|SNP23_MOUSE	O09044	SNP23_MOUSE	Snap23	Synaptosomal-associated protein 23	36469.2	41888	36286.5	36754.9	38854.5	39911.4	30856.3	32276.2	-0.00750503	-0.108857	-0.319188
sp|Q9Z2S7-3|T22D3_MOUSE	Q9Z2S7-3	T22D3_MOUSE	Tsc22d3	Isoform 3 of TSC22 domain family protein 3	37578.7	36718.3	40202.8	41494.3	35435.4	39255.7	34053.3	29263.2	-0.00763256	0.129347	-0.238355
sp|Q9CPR4|RL17_MOUSE	Q9CPR4	RL17_MOUSE	Rpl17	60S ribosomal protein L17	37201.1	37167	33217.6	35951.8	38829.9	35934.3	36226.8	33281.9	-0.00766165	-0.112213	-0.105154
sp|Q9JHJ0|TMOD3_MOUSE	Q9JHJ0	TMOD3_MOUSE	Tmod3	Tropomodulin-3	35928.4	35082.6	42063.3	36517.4	33031.5	38363.1	34868.3	36939.9	-0.00777383	0.138361	0.00833506
sp|Q91YN9|BAG2_MOUSE	Q91YN9	BAG2_MOUSE	Bag2	BAG family molecular chaperone regulator 2	41899.1	35044.5	40902.4	31748.8	41810.2	35552.6	36549.1	28473.6	-0.007839	-0.0906543	-0.250697
sp|Q9WV55|VAPA_MOUSE	Q9WV55	VAPA_MOUSE	Vapa	Vesicle-associated membrane protein-associated protein A	38890	36073.5	33160.3	44710.1	35146.9	40225.8	29121.5	29644	-0.00785355	0.0470328	-0.359074
sp|Q9EPW0|INP4A_MOUSE	Q9EPW0	INP4A_MOUSE	Inpp4a	Type I inositol 3,4-bisphosphate 4-phosphatase	36732.9	36433.5	31689	42255	33184.9	40404.9	29444.1	41381.5	-0.00832425	0.00692583	-0.0552339
sp|Q80UW8|RPAB1_MOUSE	Q80UW8	RPAB1_MOUSE	Polr2e	DNA-directed RNA polymerases I, II, and III subunit RPABC1	42331.8	29016.8	40511.9	28189.7	31496	40271	45485.5	37818.5	-0.00843433	-0.0629753	0.215066
sp|O70152|DPM1_MOUSE	O70152	DPM1_MOUSE	Dpm1	Dolichol-phosphate mannosyltransferase subunit 1	40348.2	35903.1	40796.4	38919.2	38113.5	38599.3	31186.8	27732.4	-0.008707	0.0553938	-0.380729
sp|Q8C460|ERI3_MOUSE	Q8C460	ERI3_MOUSE	Eri3	ERI1 exoribonuclease 3	31844	41629.6	37221.4	38270	33948.1	39977.1	32321.1	37340.2	-0.00883912	0.0302467	-0.0857075
sp|Q6DID3|SCAF8_MOUSE	Q6DID3	SCAF8_MOUSE	Scaf8	Protein SCAF8	29781.5	28596.7	30236.9	28396.2	31174.9	27565.2	54478.5	72767.3	-0.00891585	-0.00263095	1.1152
sp|Q9CRC0|VKOR1_MOUSE	Q9CRC0	VKOR1_MOUSE	Vkorc1	Vitamin K epoxide reductase complex subunit 1	37755.1	38374.2	36869.7	37479.5	36596	40016.8	31948.9	33436.5	-0.00913336	-0.0432681	-0.228618
sp|Q9Z1Q5|CLIC1_MOUSE	Q9Z1Q5	CLIC1_MOUSE	Clic1	Chloride intracellular channel protein 1	35945.6	41224.7	37195.9	32002.6	39975.1	37685.8	32689.8	34546.3	-0.00914231	-0.166447	-0.207953
sp|Q9QXL2|KI21A_MOUSE	Q9QXL2	KI21A_MOUSE	Kif21a	Kinesin-like protein KIF21A	26034.2	43831	25556.9	43801.6	33462.9	36846.9	28190.6	48174.6	-0.00915134	-0.0196517	0.11919
sp|Q9D7X3|DUS3_MOUSE	Q9D7X3	DUS3_MOUSE	Dusp3	Dual specificity protein phosphatase 3	34255.5	36545.6	43697.5	36244.4	36195.3	35059.4	36985.6	40040.5	-0.00921346	0.165968	0.112362
sp|Q9DBF1|AL7A1_MOUSE	Q9DBF1	AL7A1_MOUSE	Aldh7a1	Alpha-aminoadipic semialdehyde dehydrogenase	37357.3	37153.9	37048.9	39019.9	35227.7	39771.4	31832	35052.4	-0.00941661	0.0204317	-0.165204
sp|Q9WTX6|CUL1_MOUSE	Q9WTX6	CUL1_MOUSE	Cul1	Cullin-1	36395.5	33245.5	32418.6	33595.5	36337.9	33765.7	43453	48950.1	-0.00955212	-0.086716	0.398452
sp|P09055|ITB1_MOUSE	P09055	ITB1_MOUSE	Itgb1	Integrin beta-1	37493.2	35105.5	41620.5	26894	38817.8	34273.8	42041.2	33290.1	-0.00976185	-0.0932951	0.0435442
sp|Q9CPT4|CS010_MOUSE	Q9CPT4	CS010_MOUSE	D17Wsu104e	UPF0556 protein C19orf10 homolog	35677.5	36984.7	43650.6	38946.7	37507.8	35650.2	32322.6	29491.5	-0.0098112	0.175079	-0.243079
sp|P54822|PUR8_MOUSE	P54822	PUR8_MOUSE	Adsl	Adenylosuccinate lyase	36919.9	36417.2	41545.9	36474.7	34819.4	39038.5	36642.4	30176.2	-0.0102086	0.0791046	-0.144501
sp|P97372|PSME2_MOUSE	P97372	PSME2_MOUSE	Psme2	Proteasome activator complex subunit 2	39211	33914.4	36420.4	37162	38236.1	35417.4	34304.8	31791.8	-0.0103825	-0.00139574	-0.156179
sp|P97765|WBP2_MOUSE	P97765	WBP2_MOUSE	Wbp2	WW domain-binding protein 2	32991.1	34003.4	40704.5	33810.7	35859.5	31621.5	42764.4	43065.4	-0.0104374	0.143053	0.346998
sp|O08749|DLDH_MOUSE	O08749	DLDH_MOUSE	Dld	Dihydrolipoyl dehydrogenase, mitochondrial	37005.5	39613	36431.7	37333.4	39640	37559.7	34235.5	33953.9	-0.0109035	-0.0656577	-0.179049
sp|Q8BLN5|ERG7_MOUSE	Q8BLN5	ERG7_MOUSE	Lss	Lanosterol synthase	30210.8	37969.4	44950.9	44041.1	35508.3	33189.8	35997.5	35874.3	-0.010917	0.373406	0.0651561
sp|P53810|PIPNA_MOUSE	P53810	PIPNA_MOUSE	Pitpna	Phosphatidylinositol transfer protein alpha isoform	31645.7	32491.2	47277.1	32889	32182.3	32446.1	42151	53107.6	-0.0110131	0.310826	0.559683
sp|Q8K3H0|DP13A_MOUSE	Q8K3H0	DP13A_MOUSE	Appl1	DCC-interacting protein 13-alpha	35255.7	39877.8	34367.7	38060.6	40441.1	35269.7	37140.3	30395	-0.0110422	-0.0639447	-0.164856
sp|Q99PV0|PRP8_MOUSE	Q99PV0	PRP8_MOUSE	Prpf8	Pre-mRNA-processing-splicing factor 8	27833	28710.4	26170.3	25679.1	28530.3	28454.8	59519.4	80327.7	-0.0112265	-0.136256	1.29519
sp|Q3UKJ7|SMU1_MOUSE	Q3UKJ7	SMU1_MOUSE	Smu1	WD40 repeat-containing protein SMU1	21958.9	33358.8	16126.6	29040.8	24778.3	30979.2	50715.3	106967	-0.0114254	-0.303881	1.49978
sp|Q9QYB2|DACH1_MOUSE	Q9QYB2	DACH1_MOUSE	Dach1	Dachshund homolog 1	35629.9	36753.5	29589.4	40356.3	34307.6	38652.5	30650.8	41973.8	-0.0114485	-0.0608718	-0.00664965
sp|Q61136|PRP4B_MOUSE	Q61136	PRP4B_MOUSE	Prpf4b	Serine/threonine-protein kinase PRP4 homolog	28752	26727.9	30018.5	28410	27577.3	28349.6	54865.9	84463.3	-0.0115753	0.0631302	1.31688
sp|Q8C8U0|LIPB1_MOUSE	Q8C8U0	LIPB1_MOUSE	Ppfibp1	Liprin-beta-1	36910.1	39225.6	39091.3	33792.8	44058.2	32708.1	41480.4	21925.8	-0.0118989	-0.07487	-0.275848
sp|Q9CR89|ERGI2_MOUSE	Q9CR89	ERGI2_MOUSE	Ergic2	Endoplasmic reticulum-Golgi intermediate compartment protein 2	42896.8	35604.6	40289	33709.4	40782	38369.6	34341.9	25249.3	-0.0119001	-0.0971254	-0.409521
sp|O55060|TPMT_MOUSE	O55060	TPMT_MOUSE	Tpmt	Thiopurine S-methyltransferase	38865.3	34724.1	45024.3	35262.2	38978.1	35237.5	32108.7	30913.5	-0.0122234	0.113437	-0.235861
sp|Q8K1E0|STX5_MOUSE	Q8K1E0	STX5_MOUSE	Stx5	Syntaxin-5	36071.8	40957.8	33024.5	38338.3	37174	40526.9	30319	36153.4	-0.0125185	-0.12276	-0.225176
sp|Q6SJ95|TBPL2_MOUSE	Q6SJ95	TBPL2_MOUSE	Tbpl2	TATA box-binding protein-like protein 2	34942	32361.1	36788.4	43339.9	31608.5	36282.4	43734.8	34093.6	-0.0125436	0.239095	0.197079
sp|P26043|RADI_MOUSE	P26043	RADI_MOUSE	Rdx	Radixin	42254.5	33592	36634	36626.4	40220.1	36298.4	31977	28575.8	-0.012727	-0.0627753	-0.337614
sp|Q8K003|TMA7_MOUSE	Q8K003	TMA7_MOUSE	Tma7	Translation machinery-associated protein 7	38615	38199.1	34714.5	36489.6	40887.9	36609.7	32063.6	27338.5	-0.01278	-0.122189	-0.383636
sp|Q3U1J4|DDB1_MOUSE	Q3U1J4	DDB1_MOUSE	Ddb1	DNA damage-binding protein 1	33269.2	37056.6	31422.5	35782.7	33825.1	37136.8	37814	49900	-0.0129917	-0.0784741	0.305761
sp|Q8R3C0|MCMBP_MOUSE	Q8R3C0	MCMBP_MOUSE	Mcmbp	Mini-chromosome maintenance complex-binding protein	34586.1	34084.6	34336.2	39309	32226.9	37067.5	33953.9	52494.3	-0.0130457	0.0878523	0.319096
sp|Q3UDE2|TTL12_MOUSE	Q3UDE2	TTL12_MOUSE	Ttll12	Tubulin--tyrosine ligase-like protein 12	40077.6	30119.8	34484.7	42763	36555.6	34280.9	35030.4	34280.1	-0.0130764	0.124997	-0.0314199
sp|Q9D6L8|PPIL3_MOUSE	Q9D6L8	PPIL3_MOUSE	Ppil3	Peptidyl-prolyl cis-trans isomerase-like 3	39513.3	26441.1	33078.7	30621.8	36690	29872.5	44303.6	54620.1	-0.0132415	-0.0634059	0.571606
sp|Q6P069|SORCN_MOUSE	Q6P069	SORCN_MOUSE	Sri	Sorcin	35427.1	38242.8	54987.4	33695.3	34782.2	39595.2	35654.2	26492.6	-0.0137879	0.253789	-0.259185
sp|A3KMP2|TTC38_MOUSE	A3KMP2	TTC38_MOUSE	Ttc38	Tetratricopeptide repeat protein 38	41116.3	32324.2	44280.3	41721.8	35562.4	38588.2	32291.6	25772.1	-0.0138809	0.213914	-0.352822
sp|Q9EPA7|NMNA1_MOUSE	Q9EPA7	NMNA1_MOUSE	Nmnat1	Nicotinamide mononucleotide adenylyltransferase 1	32790	36440.7	25622.7	46074.9	30151.5	39764.1	29867.6	37223.7	-0.0142007	0.0363101	-0.0594862
sp|Q8BW72|KDM4A_MOUSE	Q8BW72	KDM4A_MOUSE	Kdm4a	Lysine-specific demethylase 4A	36068.4	26884.2	49123.1	31648.3	33354.2	30230.7	49879.5	48577.8	-0.0144187	0.34516	0.630814
sp|Q9CU62|SMC1A_MOUSE	Q9CU62	SMC1A_MOUSE	Smc1a	Structural maintenance of chromosomes protein 1A	34773.1	34967.5	49182.4	34284.6	32547.8	37917.7	36156.4	41649	-0.0149189	0.244288	0.142951
sp|Q9QZX7|SRR_MOUSE	Q9QZX7	SRR_MOUSE	Srr	Serine racemase	35503.9	40222.9	42845.1	33409.9	41786.6	34730	29646.5	31956.8	-0.0149691	-0.00494141	-0.312767
sp|O54774|AP3D1_MOUSE	O54774	AP3D1_MOUSE	Ap3d1	AP-3 complex subunit delta-1	40600.5	33684.3	33244.8	38515.1	37473.4	37598.8	35944.6	31084.9	-0.0152132	-0.0651031	-0.163483
sp|P70340|SMAD1_MOUSE	P70340	SMAD1_MOUSE	Smad1	Mothers against decapentaplegic homolog 1	36231.2	36177.7	39105.4	42820.7	35152	38024.7	32421.1	29382.6	-0.0152153	0.16294	-0.24369
sp|Q9CQW2|ARL8B_MOUSE	Q9CQW2	ARL8B_MOUSE	Arl8b	ADP-ribosylation factor-like protein 8B	30051.9	41045.7	47168.5	38525.9	37524.5	34339.6	37755.5	21787.9	-0.0154718	0.253929	-0.27133
sp|P80318|TCPG_MOUSE	P80318	TCPG_MOUSE	Cct3	T-complex protein 1 subunit gamma	40775.7	33843.9	38776.6	38390	38643.5	36789.1	36741.6	28133.2	-0.0156326	0.0327871	-0.217531
sp|Q6A009|LTN1_MOUSE	Q6A009	LTN1_MOUSE	Ltn1	E3 ubiquitin-protein ligase listerin	37258.8	32907.3	32632.8	39247.3	37793.7	33143.3	40502.1	34109.2	-0.0157661	0.0190524	0.0728557
sp|Q6P8M1|TATD1_MOUSE	Q6P8M1	TATD1_MOUSE	Tatdn1	Putative deoxyribonuclease TATDN1	39404.1	36392.4	45392.9	35369.9	37512	39119.4	28627.1	37668.3	-0.0158031	0.0757555	-0.209025
sp|Q6ZWX6|IF2A_MOUSE	Q6ZWX6	IF2A_MOUSE	Eif2s1	Eukaryotic translation initiation factor 2 subunit 1	37175.6	33487.3	39321.5	31204.1	39940.9	31511.8	43877.9	33845.6	-0.0160345	-0.01884	0.121363
sp|Q6PR54|RIF1_MOUSE	Q6PR54	RIF1_MOUSE	Rif1	Telomere-associated protein RIF1	40720.2	30258.9	32619.7	41804.6	33539.4	38234.6	36496.9	40444.2	-0.0160665	0.0523134	0.100294
sp|P42932|TCPQ_MOUSE	P42932	TCPQ_MOUSE	Cct8	T-complex protein 1 subunit theta	37644.1	36141.2	38392.7	35386	38557.4	36058.1	35154.4	34033.1	-0.0161425	-0.0162713	-0.108964
sp|P59326|YTHD1_MOUSE	P59326	YTHD1_MOUSE	Ythdf1	YTH domain-containing family protein 1	26995	40913.4	39728.9	39943.3	29273.6	39400.8	43197.8	46985.1	-0.0161816	0.214304	0.393083
sp|Q8BYB9|PGLT1_MOUSE	Q8BYB9	PGLT1_MOUSE	Poglut1	Protein O-glucosyltransferase 1	37054.4	33661.2	40528.8	39553.3	32630	38884.7	35710.6	36008	-0.01621	0.163241	0.00410776
sp|Q9WVA3|BUB3_MOUSE	Q9WVA3	BUB3_MOUSE	Bub3	Mitotic checkpoint protein BUB3	34219.1	28113.7	34236.1	29851.8	32426	30629.1	48572.9	60468.7	-0.0166213	0.023441	0.790193
sp|P62702|RS4X_MOUSE	P62702	RS4X_MOUSE	Rps4x	40S ribosomal protein S4, X isoform	37326.8	38637.4	26396.8	32499.9	40754.3	36105.1	35128.4	43631.1	-0.0169007	-0.384032	0.0352337
sp|O08795|GLU2B_MOUSE	O08795	GLU2B_MOUSE	Prkcsh	Glucosidase 2 subunit beta	35053	43981.7	32536.8	43223.5	36414.3	43565.8	26549.8	27215.3	-0.0171546	-0.0781964	-0.572969
sp|Q65Z40|WAPL_MOUSE	Q65Z40	WAPL_MOUSE	Wapal	Wings apart-like protein homolog	36375.5	35533.8	29512.5	37685	33298.2	39474.1	37091.9	46772.7	-0.0172114	-0.114981	0.204671
sp|Q7TPR4|ACTN1_MOUSE	Q7TPR4	ACTN1_MOUSE	Actn1	Alpha-actinin-1	38181.3	37095.7	39156.9	35452.1	38839.8	37348.2	33460.9	31886.8	-0.0173556	-0.0302159	-0.22143
sp|P62488|RPB7_MOUSE	P62488	RPB7_MOUSE	Polr2g	DNA-directed RNA polymerase II subunit RPB7	32062.8	31897.7	30945.5	30593.6	33039.8	31708.4	45996.3	56077.5	-0.0176598	-0.0733369	0.6567
sp|Q80U78|PUM1_MOUSE	Q80U78	PUM1_MOUSE	Pum1	Pumilio homolog 1	35445.5	37545.4	25711.5	37612.8	37948.7	35947.4	37693.1	37474.7	-0.0177812	-0.222739	0.0246161
sp|Q8VDZ4|ZDHC5_MOUSE	Q8VDZ4	ZDHC5_MOUSE	Zdhhc5	Palmitoyltransferase ZDHHC5	33084.4	36529.3	33444.5	42783.5	40720.7	29767.9	33237.9	38912.7	-0.018019	0.11293	0.0336208
sp|Q61990|PCBP2_MOUSE	Q61990	PCBP2_MOUSE	Pcbp2	Poly(rC)-binding protein 2	37655.6	29573.2	33645.9	43221	31418	36657.9	35737.6	45495.8	-0.0180646	0.175218	0.254928
sp|Q8C6E0|CC104_MOUSE	Q8C6E0	CC104_MOUSE	Ccdc104	Coiled-coil domain-containing protein 104	37129.9	34239.2	37551.2	40237	31649.1	40620.3	38475.1	31686	-0.0180845	0.106168	-0.0427144
sp|Q922Q8|LRC59_MOUSE	Q922Q8	LRC59_MOUSE	Lrrc59	Leucine-rich repeat-containing protein 59	35992.5	35173.6	41132.7	39314.7	36849.5	35219.6	35995.6	35193.6	-0.0181911	0.158664	-0.017722
sp|P62821|RAB1A_MOUSE	P62821	RAB1A_MOUSE	Rab1A	Ras-related protein Rab-1A	38297.4	37862.7	38862.6	35292.2	40158.1	36972.9	31757.2	29480.4	-0.018277	-0.0567704	-0.332896
sp|P62242|RS8_MOUSE	P62242	RS8_MOUSE	Rps8	40S ribosomal protein S8	38660.1	36511	36276.1	39367.6	37486.2	38653.5	34814.1	34338.1	-0.0184703	-0.0094295	-0.138874
sp|Q6ZQB6|VIP2_MOUSE	Q6ZQB6	VIP2_MOUSE	Ppip5k2	Inositol hexakisphosphate and diphosphoinositol-pentakisphosphate kinase 2	34000	34687.1	40530.1	37952.5	35950.9	33626.4	39087.8	39543.7	-0.0185769	0.173756	0.176492
sp|Q9CQ65|MTAP_MOUSE	Q9CQ65	MTAP_MOUSE	Mtap	S-methyl-5'-thioadenosine phosphorylase	37748.1	33539	32969.1	28537.4	39673.4	32563.1	44068.8	46013.5	-0.019086	-0.231989	0.318516
sp|P31254|UBA1Y_MOUSE	P31254	UBA1Y_MOUSE	Uba1y	Ubiquitin-like modifier-activating enzyme 1 Y	35875.1	36749.6	40374.1	35025.4	37681.3	35916.3	33937.9	39170.6	-0.0191977	0.0348964	-0.00961768
sp|Q9CY58|PAIRB_MOUSE	Q9CY58	PAIRB_MOUSE	Serbp1	Plasminogen activator inhibitor 1 RNA-binding protein	31895.9	31870.3	28349.3	57787.1	33256.5	31364.8	35358.4	35737.3	-0.0192176	0.414615	0.137753
sp|Q3U9G9|LBR_MOUSE	Q3U9G9	LBR_MOUSE	Lbr	Lamin-B receptor	34471.6	50900.4	19200.6	28100.3	42527.4	43999	27887.5	37357.5	-0.0193766	-0.871273	-0.407272
sp|Q6P1F6|2ABA_MOUSE	Q6P1F6	2ABA_MOUSE	Ppp2r2a	Serine/threonine-protein phosphatase 2A 55 kDa regulatory subunit B alpha isoform	38951.5	34803.2	38078.7	34163.1	38344.2	36412	38611.8	33634.6	-0.0194575	-0.0493591	-0.0492668
sp|Q91WC0|SETD3_MOUSE	Q91WC0	SETD3_MOUSE	Setd3	Histone-lysine N-methyltransferase setd3	41581.7	32999.3	40905.4	33692.5	39315.2	36305.5	42973.7	25906.2	-0.0199724	-0.019646	-0.134698
sp|Q8CEC0|NUP88_MOUSE	Q8CEC0	NUP88_MOUSE	Nup88	Nuclear pore complex protein Nup88	40369	37751.8	35370.2	39966.2	38011.2	41213.1	30914.4	28478.4	-0.0202362	-0.0725962	-0.415657
sp|Q6P5G6|UBXN7_MOUSE	Q6P5G6	UBXN7_MOUSE	Ubxn7	UBX domain-containing protein 7	38407	32509.8	43163.7	35039.8	34875.4	37043.7	37281.1	39387	-0.0202452	0.120859	0.0922521
sp|Q9Z1X4|ILF3_MOUSE	Q9Z1X4	ILF3_MOUSE	Ilf3	Interleukin enhancer-binding factor 3	31263.4	33881.1	32042.2	32342.6	32835.7	33230	46637.6	56427.1	-0.0202576	-0.0371826	0.641577
sp|Q8VIJ6|SFPQ_MOUSE	Q8VIJ6	SFPQ_MOUSE	Sfpq	Splicing factor, proline- and glutamine-rich	25866.8	25174.4	26297.8	26339.4	26064.9	25699.1	65063.6	84547.8	-0.020287	0.0241327	1.5312
sp|P62334|PRS10_MOUSE	P62334	PRS10_MOUSE	Psmc6	26S protease regulatory subunit 10B	38455.8	38416.3	34500.2	47621.1	40764.5	37245.5	24162.7	31030.8	-0.0211994	0.0740968	-0.499161
sp|P09103|PDIA1_MOUSE	P09103	PDIA1_MOUSE	P4hb	Protein disulfide-isomerase	41510.5	35124	41398.1	32660.1	40087.8	37697.9	31116.2	30194.6	-0.0215117	-0.0708451	-0.343364
sp|P68037|UB2L3_MOUSE	P68037	UB2L3_MOUSE	Ube2l3	Ubiquitin-conjugating enzyme E2 L3	41241.7	35641.6	34995.3	40214	37404	40656.5	32349.6	25348.2	-0.0219214	-0.0536809	-0.436075
sp|O08992|SDCB1_MOUSE	O08992	SDCB1_MOUSE	Sdcbp	Syntenin-1	37796.2	41942.5	18906.1	23596.2	47557	33443.2	42188.9	44528	-0.0226439	-0.930385	0.098388
sp|O70546|KDM6A_MOUSE	O70546	KDM6A_MOUSE	Kdm6a	Lysine-specific demethylase 6A	32980.6	31335.4	33851.5	33128.8	33222	32125.3	49885.2	51791.8	-0.0229495	0.0356085	0.637793
sp|Q04735|CDK16_MOUSE	Q04735	CDK16_MOUSE	Cdk16	Cyclin-dependent kinase 16	41664	38679.8	32110.6	31890.5	39416.8	42227.5	33515.3	30748.4	-0.0231658	-0.351257	-0.345351
sp|Q8K4Z5|SF3A1_MOUSE	Q8K4Z5	SF3A1_MOUSE	Sf3a1	Splicing factor 3A subunit 1	27887.9	23603.5	23823.9	25746.8	25774.3	26551	66060.6	87966.5	-0.0231767	-0.0780223	1.5576
sp|P62814|VATB2_MOUSE	P62814	VATB2_MOUSE	Atp6v1b2	V-type proton ATPase subunit B, brain isoform	33726.1	34023.6	36719.1	32039.2	37418.8	31431.7	40907.1	48347.6	-0.02325	-0.00193271	0.374462
sp|Q9D824|FIP1_MOUSE	Q9D824	FIP1_MOUSE	Fip1l1	Pre-mRNA 3'-end-processing factor FIP1	26347.5	26600.8	29886.9	26958.6	26982.1	26829.1	65637.3	76406.9	-0.0233235	0.0791378	1.40036
sp|Q80YQ8|RMD5A_MOUSE	Q80YQ8	RMD5A_MOUSE	Rmnd5a	Protein RMD5 homolog A	38233.4	38664.2	37698.4	35439.4	39366	38796.7	31934.4	33856	-0.0235414	-0.0958633	-0.248601
sp|Q9DCD0|6PGD_MOUSE	Q9DCD0	6PGD_MOUSE	Pgd	6-phosphogluconate dehydrogenase, decarboxylating	34131.9	35268.9	34549.1	34847.2	36825.2	33720.9	39003	48131.1	-0.0236146	-0.0237075	0.304671
sp|Q99NB1|ACS2L_MOUSE	Q99NB1	ACS2L_MOUSE	Acss1	Acetyl-coenzyme A synthetase 2-like, mitochondrial	34758.2	40577.3	34463.6	30186.1	36531	40049.8	39159.9	32234	-0.0236531	-0.24434	-0.101181
sp|Q05D44|IF2P_MOUSE	Q05D44	IF2P_MOUSE	Eif5b	Eukaryotic translation initiation factor 5B	37379.5	38661.8	31421.2	39536.7	39209.9	38095.4	32938.9	30309.7	-0.0237847	-0.123605	-0.289535
sp|Q8BG81|PDIP3_MOUSE	Q8BG81	PDIP3_MOUSE	Poldip3	Polymerase delta-interacting protein 3	25880.8	28840.4	23677.6	25679.1	27286.2	28347.7	61856.4	84855.6	-0.0238647	-0.172719	1.39895
sp|Q5SYL3|K0100_MOUSE	Q5SYL3	K0100_MOUSE	Kiaa0100	UPF0378 protein KIAA0100	36007.5	39252.6	34555.9	32355.2	36758.1	39771.1	34473.9	40142	-0.0241257	-0.193766	-0.0365283
sp|Q3UFB2|BCD1_MOUSE	Q3UFB2	BCD1_MOUSE	Znhit6	Box C/D snoRNA protein 1	30962.1	26752.2	33728.2	29582	31318.5	27369.2	55153.4	66757.1	-0.0241296	0.109381	1.05469
sp|P30051|TEAD1_MOUSE	P30051	TEAD1_MOUSE	Tead1	Transcriptional enhancer factor TEF-1	37224.6	35066.4	38247.3	32050.7	37164.2	36359.8	41219.3	37181	-0.0244008	-0.0647325	0.0926439
sp|Q91YR7|PRP6_MOUSE	Q91YR7	PRP6_MOUSE	Prpf6	Pre-mRNA-processing factor 6	25942.3	26709.9	25033.6	25251.1	26493.3	27065.4	61497.2	94974.8	-0.0246272	-0.091002	1.54671
sp|Q8CH77|NAV1_MOUSE	Q8CH77	NAV1_MOUSE	Nav1	Neuron navigator 1	33168	36540.5	37040.6	44298.8	34919.7	35989.7	31393	31873.4	-0.0246421	0.197977	-0.164538
sp|Q62158|TRI27_MOUSE	Q62158	TRI27_MOUSE	Trim27	Zinc finger protein RFP	37778.8	33919.4	37141	33984	37922.6	35029.9	43174.3	31873.8	-0.0250211	-0.0366008	0.0408582
sp|Q9QUM9|PSA6_MOUSE	Q9QUM9	PSA6_MOUSE	Psma6	Proteasome subunit alpha type-6	37293.8	37962.5	36245.7	33306.6	37954.9	38630.6	35419.9	32509.4	-0.0252588	-0.138973	-0.173037
sp|Q7TQ95|LNP_MOUSE	Q7TQ95	LNP_MOUSE	Lnp	Protein lunapark	32449.1	39266.6	41939	39998.7	37279.9	35708.6	30028.2	34228.4	-0.0253796	0.166858	-0.183823
sp|Q6NZF1|ZC11A_MOUSE	Q6NZF1	ZC11A_MOUSE	Zc3h11a	Zinc finger CCCH domain-containing protein 11A	34281.9	31990.6	25352.2	33159.2	30013.5	37438.2	39439.9	57778.6	-0.0254444	-0.205138	0.527377
sp|Q3UUG6|TBC24_MOUSE	Q3UUG6	TBC24_MOUSE	Tbc1d24	TBC1 domain family member 24	29136.5	39637.8	33572.2	47563.6	31071.7	38938.6	29756	41400.6	-0.0256969	0.212772	0.0234328
sp|Q9JKF1|IQGA1_MOUSE	Q9JKF1	IQGA1_MOUSE	Iqgap1	Ras GTPase-activating-like protein IQGAP1	34422.4	39659.9	34998.2	38887	35361.5	40054.3	30865.7	32755.3	-0.025737	-0.0295825	-0.245366
sp|Q9CQ49|NCBP2_MOUSE	Q9CQ49	NCBP2_MOUSE	Ncbp2	Nuclear cap-binding protein subunit 2	33424.7	24891.6	32358.3	17466.2	35100.6	24265.9	60917.2	83555.4	-0.0257483	-0.252795	1.28308
sp|Q9DB50|AP1S2_MOUSE	Q9DB50	AP1S2_MOUSE	Ap1s2	AP-1 complex subunit sigma-2	37335.4	35574.9	36038.5	39779.8	38165.1	36062.5	36104.3	35500.9	-0.0258331	0.0305916	-0.0518901
sp|Q99LG2|TNPO2_MOUSE	Q99LG2	TNPO2_MOUSE	Tnpo2	Transportin-2	38330.6	32880.6	29866.3	45587	37161.9	35338.3	28691.3	28636.8	-0.0258797	0.0576004	-0.338741
sp|P34022|RANG_MOUSE	P34022	RANG_MOUSE	Ranbp1	Ran-specific GTPase-activating protein	37178	36425.7	44090.9	37692.7	41560	33381.5	34577.9	20175.3	-0.0259871	0.126047	-0.452821
sp|P83877|TXN4A_MOUSE	P83877	TXN4A_MOUSE	Txnl4a	Thioredoxin-like protein 4A	20231.2	26865.3	24401.6	24635.8	24321.3	23638.4	74416.8	85137.2	-0.0262056	0.0320573	1.73415
sp|Q60989|XIAP_MOUSE	Q60989	XIAP_MOUSE	Xiap	E3 ubiquitin-protein ligase XIAP	36153.5	34492.2	34687.4	39562.2	36254.3	35693.5	37642.1	41628.1	-0.026348	0.0454327	0.13983
sp|Q9D6K5|SYJ2B_MOUSE	Q9D6K5	SYJ2B_MOUSE	Synj2bp	Synaptojanin-2-binding protein	32847.8	42223.1	39261.1	37237.3	34666.7	41788	29278.6	40523.8	-0.0263521	0.000824188	-0.131328
sp|Q8BND4|DX26B_MOUSE	Q8BND4	DX26B_MOUSE	Ddx26b	Protein DDX26B	39995.5	32335.6	37871.2	28090.2	41431.7	32238.6	39907.5	39553.2	-0.0264666	-0.159461	0.10916
sp|Q8BRT1|CLAP2_MOUSE	Q8BRT1	CLAP2_MOUSE	Clasp2	CLIP-associating protein 2	37830	37526.4	34205.6	37836.5	40367.3	36391.5	35432.7	29582.5	-0.0266025	-0.0914942	-0.239557
sp|Q8CHP8|PGP_MOUSE	Q8CHP8	PGP_MOUSE	Pgp	Phosphoglycolate phosphatase	33925.6	40327.5	35785.6	37147	36282.9	39353.5	34452.3	34667.2	-0.0266272	-0.0525156	-0.129987
sp|Q8CFQ3|AQR_MOUSE	Q8CFQ3	AQR_MOUSE	Aqr	Intron-binding protein aquarius	28295	29545.9	29718.7	30733.9	29110	29812.8	47423.5	87646.9	-0.0267359	0.0369776	1.19681
sp|Q60737|CSK21_MOUSE	Q60737	CSK21_MOUSE	Csnk2a1	Casein kinase II subunit alpha	36206.6	31144.8	39055.2	38861.4	34273.1	34353.7	40536.2	43298.9	-0.0270622	0.18316	0.288783
sp|P97379|G3BP2_MOUSE	P97379	G3BP2_MOUSE	G3bp2	Ras GTPase-activating protein-binding protein 2	36890.3	35846.2	39352	37056.6	36495.7	37635.4	34003.3	33262.9	-0.0273992	0.0436545	-0.140199
sp|Q61166|MARE1_MOUSE	Q61166	MARE1_MOUSE	Mapre1	Microtubule-associated protein RP/EB family member 1	39924.7	39759.3	28702.6	33183.7	44355.1	36862.6	33146.9	32582.4	-0.0275057	-0.392174	-0.305257
sp|Q91XU0|WRIP1_MOUSE	Q91XU0	WRIP1_MOUSE	Wrnip1	ATPase WRNIP1	34917	33362	40715.4	36745.1	35423.5	34172.8	35836.1	45626.3	-0.0275692	0.154449	0.227123
sp|P70336|ROCK2_MOUSE	P70336	ROCK2_MOUSE	Rock2	Rho-associated protein kinase 2	35287.6	37184.4	36261.7	38077.8	37121	36754.6	31715.3	41815.4	-0.0276738	0.0090298	-0.00675091
sp|P61979-3|HNRPK_MOUSE	P61979-3	HNRPK_MOUSE	Hnrnpk	Isoform 3 of Heterogeneous nuclear ribonucleoprotein K	29698	25273.6	30895.3	29123.2	27632.2	28409.4	63884.1	65357.3	-0.0278128	0.0989068	1.2055
sp|Q9Z2U2|ZN292_MOUSE	Q9Z2U2	ZN292_MOUSE	Zfp292	Zinc finger protein 292	42018.5	31878.3	48097.3	40263.6	39079.3	36260.3	35754.6	31068.1	-0.0278956	0.230001	-0.17307
sp|P70318|TIAR_MOUSE	P70318	TIAR_MOUSE	Tial1	Nucleolysin TIAR	25667.2	24745.7	26253.5	23930.7	26169.9	25234.9	63659.8	95803.3	-0.0281119	-0.034668	1.63325
sp|Q80ZJ1|RAP2A_MOUSE	Q80ZJ1	RAP2A_MOUSE	Rap2a	Ras-related protein Rap-2a	34926.2	41332.9	35087.2	38640.7	37853.7	39906.1	33102	29705.5	-0.0281155	-0.0768124	-0.308088
sp|Q9WTM5|RUVB2_MOUSE	Q9WTM5	RUVB2_MOUSE	Ruvbl2	RuvB-like 2	36349.4	34415.2	34206.4	38272.7	34568.3	37593.8	38700	40967.5	-0.0282152	0.00632308	0.14275
sp|Q4VAA2|CDV3_MOUSE	Q4VAA2	CDV3_MOUSE	Cdv3	Protein CDV3	37422.4	35619.3	41574.5	36179.7	38229.1	36264.7	35222.2	33200.6	-0.0284015	0.0617996	-0.122644
sp|Q7M6Y3|PICAL_MOUSE	Q7M6Y3	PICAL_MOUSE	Picalm	Phosphatidylinositol-binding clathrin assembly protein	31828.8	40882.6	33457.3	39406.1	37098.3	37063.9	36131.3	32790.9	-0.0285003	-0.0254902	-0.105715
sp|Q9CZN8|GATA_MOUSE	Q9CZN8	GATA_MOUSE	Qrsl1	Glutamyl-tRNA(Gln) amidotransferase subunit A, mitochondrial	36764.8	38538.8	34321.9	39746.2	38716.2	38103	34082.7	33702.7	-0.028749	-0.0526144	-0.180492
sp|P13439|UMPS_MOUSE	P13439	UMPS_MOUSE	Umps	Uridine 5'-monophosphate synthase	40761.8	35632.9	34004.2	37004	38887.8	39047.8	33357.7	25929	-0.0288099	-0.134297	-0.394574
sp|Q6P2K6|P4R3A_MOUSE	Q6P2K6	P4R3A_MOUSE	Smek1	Serine/threonine-protein phosphatase 4 regulatory subunit 3A	30866.3	41364.2	30188.3	32206.5	39657.6	34034.1	39769.6	41554	-0.0288925	-0.240075	0.142172
sp|Q8VEG6|CNO6L_MOUSE	Q8VEG6	CNO6L_MOUSE	Cnot6l	CCR4-NOT transcription complex subunit 6-like	34823.5	37016.5	27130.4	35232.6	41932.9	31367.4	34915.5	39057.3	-0.0290289	-0.233127	0.0131764
sp|Q61183|PAPOA_MOUSE	Q61183	PAPOA_MOUSE	Papola	Poly(A) polymerase alpha	33638.1	31945.4	30523.7	31511	33318.6	33602.5	45885.9	54141	-0.029131	-0.109385	0.579854
sp|Q924L1|LTMD1_MOUSE	Q924L1	LTMD1_MOUSE	Letmd1	LETM1 domain-containing protein 1	33244.4	40903.2	40561.5	35339.7	41126.7	34533.5	37074.3	27310.9	-0.0291339	0.00458859	-0.232805
sp|Q99PU8|DHX30_MOUSE	Q99PU8	DHX30_MOUSE	Dhx30	Putative ATP-dependent RNA helicase DHX30	36453.7	34707.8	39251.6	39784.2	37184	35436.6	35937.4	35419.2	-0.0292808	0.122129	-0.0253308
sp|Q8K4Z3|NNRE_MOUSE	Q8K4Z3	NNRE_MOUSE	Apoa1bp	NAD(P)H-hydrate epimerase	34837.2	41229.1	39596	34121	39195.6	38440.3	30200	30911.1	-0.0294663	-0.0747254	-0.345288
sp|Q99MJ9|DDX50_MOUSE	Q99MJ9	DDX50_MOUSE	Ddx50	ATP-dependent RNA helicase DDX50	29929.4	37891.7	34443.1	36866.4	33280.3	35958.5	39777.6	46947.7	-0.0298483	0.0425126	0.324871
sp|Q3TIU4|PDE12_MOUSE	Q3TIU4	PDE12_MOUSE	Pde12	2',5'-phosphodiesterase 12	32001.5	39835.7	38500.7	40578.5	31561.2	41780.8	31545.7	37557.3	-0.0299082	0.108659	-0.0858917
sp|P62264|RS14_MOUSE	P62264	RS14_MOUSE	Rps14	40S ribosomal protein S14	43350.9	33722.6	36622.1	40741.3	39802.5	38901.9	32121.1	20191.2	-0.0302093	-0.0247947	-0.589296
sp|Q99LI9|CLP1_MOUSE	Q99LI9	CLP1_MOUSE	Clp1	Polyribonucleotide 5'-hydroxyl-kinase Clp1	30960.6	29892.2	35910.2	32050.5	30752.8	31397.1	45955.6	68738.3	-0.030427	0.128951	0.883966
sp|P26231|CTNA1_MOUSE	P26231	CTNA1_MOUSE	Ctnna1	Catenin alpha-1	34112.5	36793.2	40254.8	34791.5	35768.4	36656.9	38450.1	42296.5	-0.0305949	0.0512852	0.156908
sp|Q9D0R8|LSM12_MOUSE	Q9D0R8	LSM12_MOUSE	Lsm12	Protein LSM12 homolog	42994.9	32111.3	33943.3	34640.3	41410.7	35324.3	39249.4	30712.9	-0.0309528	-0.162022	-0.133307
sp|P83882|RL36A_MOUSE	P83882	RL36A_MOUSE	Rpl36a	60S ribosomal protein L36a	40649.9	39594.8	30809.6	48080.8	36452.9	45539.4	18973	36868.8	-0.0310827	-0.0556391	-0.554141
sp|Q5DU02|UBP22_MOUSE	Q5DU02	UBP22_MOUSE	Usp22	Ubiquitin carboxyl-terminal hydrolase 22	32662.5	37592.3	40260.6	40392.8	35348.9	36442.7	37352.6	33040.7	-0.0312159	0.167921	-0.0283747
sp|Q8BWQ6|CP062_MOUSE	Q8BWQ6	CP062_MOUSE	>sp|Q8BWQ6|CP062_MOUSE	n/a	34640.7	44621.6	39890.9	40711	35590.4	45406.2	28390.7	33841.2	-0.031226	-0.00704856	-0.380207
sp|Q8CAQ8|IMMT_MOUSE	Q8CAQ8	IMMT_MOUSE	Immt	Mitochondrial inner membrane protein	35843	35033.2	35995.2	39274.9	39870.3	32563.8	36530.6	34298.1	-0.031367	0.0554077	-0.0323347
sp|A2AIV2|VIR_MOUSE	A2AIV2	VIR_MOUSE	Kiaa1429	Protein virilizer homolog	27397.4	25882.9	30025.7	26190.7	26625.6	27835.2	62453	81527.3	-0.0316185	0.0457716	1.40258
sp|Q71LX4|TLN2_MOUSE	Q71LX4	TLN2_MOUSE	Tln2	Talin-2	36947.3	36439.4	37120.5	36668	37752.5	37263.5	34556	46233.7	-0.0316796	-0.0238026	0.106972
sp|Q8CEE7|RDH13_MOUSE	Q8CEE7	RDH13_MOUSE	Rdh13	Retinol dehydrogenase 13	38554.8	32311.7	39991.5	34591.7	43180	29270.7	41482.7	37183.9	-0.0318977	0.0418495	0.118749
sp|P99029|PRDX5_MOUSE	P99029	PRDX5_MOUSE	Prdx5	Peroxiredoxin-5, mitochondrial	32232.6	43651.3	35709.1	41965.1	33444	44137.2	27160.4	32696.5	-0.0319139	0.00172863	-0.37419
sp|Q7JJ13|BRD2_MOUSE	Q7JJ13	BRD2_MOUSE	Brd2	Bromodomain-containing protein 2	35705.9	32349.5	32113.5	36939.4	35256.6	34323	40934.2	47157.3	-0.0319533	-0.0109606	0.340339
sp|P62309|RUXG_MOUSE	P62309	RUXG_MOUSE	Snrpg	Small nuclear ribonucleoprotein G	17933.5	18685	21869.4	20359.6	19158.8	18289.1	91920.4	112028	-0.0323119	0.173351	2.44525
sp|Q01853|TERA_MOUSE	Q01853	TERA_MOUSE	Vcp	Transitional endoplasmic reticulum ATPase	37744.3	35199.6	34772.2	38578.9	35737.9	38862.4	33091	35633.4	-0.032394	-0.0243612	-0.118357
sp|Q6ZWV3|RL10_MOUSE	Q6ZWV3	RL10_MOUSE	Rpl10	60S ribosomal protein L10	40056.6	33311	38048.4	32879.2	41435.2	33622.9	37318.5	34087.2	-0.0328655	-0.0816616	-0.0719673
sp|Q9DBG7|SRPR_MOUSE	Q9DBG7	SRPR_MOUSE	Srpr	Signal recognition particle receptor subunit alpha	33963	36278.4	40077	38797.2	37608.9	34259	37185.1	30043.1	-0.0330255	0.134205	-0.0962808
sp|P68254|1433T_MOUSE	P68254	1433T_MOUSE	Ywhaq	14-3-3 protein theta	35888.7	36747.2	34561.7	43473.3	33091.1	41242.2	30665.7	32784.8	-0.0333267	0.0701115	-0.22838
sp|Q45VK7|DYHC2_MOUSE	Q45VK7	DYHC2_MOUSE	Dync2h1	Cytoplasmic dynein 2 heavy chain 1	33725.9	39148	38733.2	36861.9	36549.2	38037.5	38226.2	32849.3	-0.0335174	0.0193736	-0.0695665
sp|P15307|REL_MOUSE	P15307	REL_MOUSE	Rel	Proto-oncogene c-Rel	38009	33698.8	43103.6	35533.5	37347.4	36053.3	36991.3	32687.1	-0.033662	0.0994167	-0.0750816
sp|Q8K3I9|GLCI1_MOUSE	Q8K3I9	GLCI1_MOUSE	Glcci1	Glucocorticoid-induced transcript 1 protein	41459.3	27962.9	58102	30373.3	43686.9	27379.7	41458.5	31967.2	-0.0337757	0.316102	0.047111
sp|Q8VD65|PI3R4_MOUSE	Q8VD65	PI3R4_MOUSE	Pik3r4	Phosphoinositide 3-kinase regulatory subunit 4	32452.7	39038.3	35980.1	39798	34523.2	38666.1	33720.8	41738.6	-0.0338711	0.0501481	0.0440691
sp|Q9ESX4|NO40_MOUSE	Q9ESX4	NO40_MOUSE	Zcchc17	Nucleolar protein of 40 kDa	37350.1	33740.1	37121.1	39141.2	36354.2	36427.3	40089.2	31858.6	-0.0339238	0.0673972	-0.0166223
sp|Q8VE19|MIO_MOUSE	Q8VE19	MIO_MOUSE	Mios	WD repeat-containing protein mio	37715.1	34365.2	40039.7	36365.7	38647	35155.9	38472.1	27935.3	-0.034072	0.0499982	-0.152333
sp|Q91YM2|RHG35_MOUSE	Q91YM2	RHG35_MOUSE	Arhgap35	Rho GTPase-activating protein 35	38024.6	37642.4	34805	39760	40894.3	36581.6	31807.2	29374.2	-0.0340843	-0.055248	-0.340655
sp|Q61598|GDIB_MOUSE	Q61598	GDIB_MOUSE	Gdi2	Rab GDP dissociation inhibitor beta	37464.4	36366.1	36385.1	39600.1	35865.4	39731.1	35468.4	29304.7	-0.0341011	0.00739996	-0.222922
sp|Q6PCL9|PAPOG_MOUSE	Q6PCL9	PAPOG_MOUSE	Papolg	Poly(A) polymerase gamma	29787.6	29163.4	36533.9	28130.4	32568.7	27799.1	51606.5	66605	-0.0342645	0.0991899	0.969517
sp|P39053|DYN1_MOUSE	P39053	DYN1_MOUSE	Dnm1	Dynamin-1	36577.3	36762	39863.4	36779.9	37033.6	38069.6	33537.1	37508.7	-0.0342851	0.0292859	-0.0801241
sp|Q8BG79|C19L2_MOUSE	Q8BG79	C19L2_MOUSE	Cwf19l2	CWF19-like protein 2	29907.2	34623.6	30193.1	31360.4	33010.2	33074.7	46535.8	56438.6	-0.0343317	-0.102479	0.639894
sp|Q8VDS8|STX18_MOUSE	Q8VDS8	STX18_MOUSE	Stx18	Syntaxin-18	40473.3	31403.3	27644.7	43912.9	37909.6	35700.8	33348.1	30744.7	-0.0343877	-0.0408045	-0.199749
sp|Q5SUF2|LC7L3_MOUSE	Q5SUF2	LC7L3_MOUSE	Luc7l3	Luc7-like protein 3	18291.9	17006.8	16620.5	18354.4	17084.8	19068.5	82359.5	137779	-0.0345129	-0.0478048	2.60621
sp|B9EKI3|TMF1_MOUSE	B9EKI3	TMF1_MOUSE	Tmf1	TATA element modulatory factor	39457.1	32383.2	38494.7	39601.3	35892.7	37708.9	37893.9	39152	-0.0349438	0.0855126	0.0659809
sp|Q80Y44|DDX10_MOUSE	Q80Y44	DDX10_MOUSE	Ddx10	Probable ATP-dependent RNA helicase DDX10	32990.1	41470.4	29342.6	33529.4	37233.3	39056.4	32999.5	44826.8	-0.0350128	-0.27907	0.0287695
sp|Q8BNY6|NCS1_MOUSE	Q8BNY6	NCS1_MOUSE	Ncs1	Neuronal calcium sensor 1	34713.1	38704.2	47951.9	32427.1	40342.2	34883.1	37137.8	30250.4	-0.0350969	0.0956019	-0.158721
sp|Q99NB9|SF3B1_MOUSE	Q99NB9	SF3B1_MOUSE	Sf3b1	Splicing factor 3B subunit 1	23604.8	24428.4	24455.9	24870.2	24920.7	24309.4	70072	92103.5	-0.0355079	0.00281089	1.71994
sp|Q99NH0|ANR17_MOUSE	Q99NH0	ANR17_MOUSE	Ankrd17	Ankyrin repeat domain-containing protein 17	34452.6	39573.5	36673.2	40839.2	37666.2	38223.5	33531.7	29615.4	-0.0358699	0.0305233	-0.265188
sp|Q8BX17|GEMI5_MOUSE	Q8BX17	GEMI5_MOUSE	Gemin5	Gem-associated protein 5	16625.4	15550	19018.3	15736	17650.2	15339.3	91456.6	142719	-0.0360492	0.0751855	2.82751
sp|Q9JK48|SHLB1_MOUSE	Q9JK48	SHLB1_MOUSE	Sh3glb1	Endophilin-B1	39243.4	36653.7	38352.2	35417.6	41072.9	36758.8	36240.8	28321.1	-0.0363127	-0.0773281	-0.269675
sp|Q9EQS3|MYCBP_MOUSE	Q9EQS3	MYCBP_MOUSE	Mycbp	C-Myc-binding protein	36811.6	45618.4	32451.3	34680.1	33081.8	51449.6	27745.5	29168.4	-0.0363171	-0.3325	-0.570707
sp|G3X9K3|BIG1_MOUSE	G3X9K3	BIG1_MOUSE	Arfgef1	Brefeldin A-inhibited guanine nucleotide-exchange protein 1	40556.9	33982.1	41319.5	35896.5	38191.4	38252.4	28617.8	37914.7	-0.0364037	0.0145008	-0.200338
sp|Q9WUM3|COR1B_MOUSE	Q9WUM3	COR1B_MOUSE	Coro1b	Coronin-1B	38649.7	37665.2	38179.6	35634.2	38569.4	39701.9	31322.4	30819.4	-0.0365175	-0.0845925	-0.332921
sp|Q9WVE8|PACN2_MOUSE	Q9WVE8	PACN2_MOUSE	Pacsin2	Protein kinase C and casein kinase substrate in neurons protein 2	38132.4	36929.1	35008.7	39178.1	35555.8	41449.9	34623.6	30087	-0.0368942	-0.0538015	-0.250965
sp|Q9CZ30|OLA1_MOUSE	Q9CZ30	OLA1_MOUSE	Ola1	Obg-like ATPase 1	36206.3	40750.7	31035.8	38806.3	36343.5	42608	29362.6	34283.5	-0.0369131	-0.176869	-0.310892
sp|A2BH40|ARI1A_MOUSE	A2BH40	ARI1A_MOUSE	Arid1a	AT-rich interactive domain-containing protein 1A	34124.4	30895.9	28112.8	33313.4	33822.6	32886	48496.8	51785.1	-0.0369849	-0.119019	0.588116
sp|Q9DCD2|SYF1_MOUSE	Q9DCD2	SYF1_MOUSE	Xab2	Pre-mRNA-splicing factor SYF1	30396	42488	34204.9	41819.9	33355	41421.6	29070.7	40598.5	-0.0369865	0.0238827	-0.102067
sp|Q8BUK6|HOOK3_MOUSE	Q8BUK6	HOOK3_MOUSE	Hook3	Protein Hook homolog 3	37784.4	33933.6	33601.8	37744.5	41112	32468.6	39197.8	29552.1	-0.0369905	-0.0444858	-0.097969
sp|Q8C5L7|RBM34_MOUSE	Q8C5L7	RBM34_MOUSE	Rbm34	RNA-binding protein 34	39430.6	33395.8	49297.2	36037.7	37720.7	36997.2	33325.2	22698.9	-0.0369929	0.191682	-0.415408
sp|Q6PGB6|NAA50_MOUSE	Q6PGB6	NAA50_MOUSE	Naa50	N-alpha-acetyltransferase 50	36907	37290.1	31006.1	40084.8	34914.4	41217.9	34220	31946.5	-0.0371458	-0.0988442	-0.202408
sp|Q8BQM4|HEAT3_MOUSE	Q8BQM4	HEAT3_MOUSE	Heatr3	HEAT repeat-containing protein 3	31384.1	30392.3	27009.4	32863.6	32009	31386.1	52058.5	57165	-0.0373144	-0.0824655	0.78484
sp|O88543|CSN3_MOUSE	O88543	CSN3_MOUSE	Cops3	COP9 signalosome complex subunit 3	34817.2	39266.8	28574.7	33725.9	38674.3	37362.7	40092.4	34673.6	-0.0375408	-0.287457	-0.0243194
sp|Q9D1C1|UBE2C_MOUSE	Q9D1C1	UBE2C_MOUSE	Ube2c	Ubiquitin-conjugating enzyme E2 C	35437.5	37439	36842	35667.8	37947.1	36853.6	34863.8	39264.1	-0.037597	-0.0448731	-0.0130341
sp|Q7TPH6|MYCB2_MOUSE	Q7TPH6	MYCB2_MOUSE	Mycbp2	E3 ubiquitin-protein ligase MYCBP2	37875.4	33705.8	40207.5	36499	38086.6	35391.4	39825.3	36222.3	-0.0377316	0.0620368	0.0495905
tr|G3UYU0|G3UYU0_MOUSE	G3UYU0	G3UYU0_MOUSE	Mex3a	Protein Mex3a	35672.1	35694	36196.5	35798.1	34984.6	38288.5	38378.8	48095.6	-0.0380449	-0.0253957	0.238989
sp|P62751|RL23A_MOUSE	P62751	RL23A_MOUSE	Rpl23a	60S ribosomal protein L23a	38591.8	38928.7	33129.2	33509.4	40242.3	39350.2	31500.3	30020.2	-0.038055	-0.256274	-0.371564
sp|P27048|RSMB_MOUSE	P27048	RSMB_MOUSE	Snrpb	Small nuclear ribonucleoprotein-associated protein B	16800.7	16466.3	16480.2	15958.2	18119.2	16040.2	88558.4	143137	-0.0381928	-0.0745839	2.76187
sp|Q8VE37|RCC1_MOUSE	Q8VE37	RCC1_MOUSE	Rcc1	Regulator of chromosome condensation	34088.8	29483.4	163890	25320.8	33911.1	31389.7	30095.2	31473.7	-0.0387047	1.53482	-0.0848987
sp|Q8BVL3|SNX17_MOUSE	Q8BVL3	SNX17_MOUSE	Snx17	Sorting nexin-17	32048.6	43190.6	27778.9	37106.8	34386.5	42904.1	31659.7	42889.9	-0.038808	-0.252392	-0.0520911
sp|Q3UYV9|NCBP1_MOUSE	Q3UYV9	NCBP1_MOUSE	Ncbp1	Nuclear cap-binding protein subunit 1	18683.3	16392.3	18870.8	20833.8	16853	19181.4	86025.1	129188	-0.0389073	0.139927	2.57832
sp|Q9JIK5|DDX21_MOUSE	Q9JIK5	DDX21_MOUSE	Ddx21	Nucleolar RNA helicase 2	30969.4	31101.1	28506.8	30423.3	33037.9	30730.1	54329.5	57670.9	-0.0389242	-0.113827	0.8126
sp|Q78PY7|SND1_MOUSE	Q78PY7	SND1_MOUSE	Snd1	Staphylococcal nuclease domain-containing protein 1	38104.2	37164.1	37394.6	36595.9	37157.3	40172.1	34275.1	30984.2	-0.038974	-0.0636776	-0.244833
sp|P30412|PPIC_MOUSE	P30412	PPIC_MOUSE	Ppic	Peptidyl-prolyl cis-trans isomerase C	32686.6	41724.6	33041.5	41361.6	37601.6	38858	29965.3	31058.6	-0.0391786	-0.0393355	-0.325325
sp|Q80UJ7|RB3GP_MOUSE	Q80UJ7	RB3GP_MOUSE	Rab3gap1	Rab3 GTPase-activating protein catalytic subunit	36862.3	35947.9	32935.1	39974.9	38050.2	36771.3	37084.8	33104.7	-0.0393137	-0.0373361	-0.0921973
sp|Q3UM18|LSG1_MOUSE	Q3UM18	LSG1_MOUSE	Lsg1	Large subunit GTPase 1 homolog	38007	35990.8	31628.8	40223.9	35945	40097.6	39707	27469.8	-0.0393243	-0.0817665	-0.178846
sp|Q9CWV6|PKRI1_MOUSE	Q9CWV6	PKRI1_MOUSE	Prkrip1	PRKR-interacting protein 1	29004.3	36178.6	18569.5	38273.1	27666.5	39327.7	45184	53472	-0.0395428	-0.237063	0.55837
sp|Q64213|SF01_MOUSE	Q64213	SF01_MOUSE	Sf1	Splicing factor 1	20231.4	21045.6	15497.6	24189.5	21330.9	21107.2	75591.4	109960	-0.0400208	-0.0966913	2.12839
sp|Q8CGC4|LS14B_MOUSE	Q8CGC4	LS14B_MOUSE	Lsm14b	Protein LSM14 homolog B	35583.4	37697.7	32885.2	41689.2	34328.7	41020.4	32047.3	36916.2	-0.0401488	-0.0149104	-0.127756
sp|Q9D8E6|RL4_MOUSE	Q9D8E6	RL4_MOUSE	Rpl4	60S ribosomal protein L4	40396.8	33680	42147.6	33503.1	40963.2	35205.7	34606.4	28564.8	-0.0401796	-0.00984892	-0.269935
sp|Q60864|STIP1_MOUSE	Q60864	STIP1_MOUSE	Stip1	Stress-induced-phosphoprotein 1	41943	33195.9	32958.7	33364	42738.3	34527.3	39180.6	28663.6	-0.0402656	-0.220323	-0.187601
sp|P08113|ENPL_MOUSE	P08113	ENPL_MOUSE	Hsp90b1	Endoplasmin	39394.7	37212.5	32853.4	34179.8	41322.2	37464.8	35341.1	30850.9	-0.0404775	-0.23308	-0.2513
sp|Q8K2Q7|BROX_MOUSE	Q8K2Q7	BROX_MOUSE	Brox	BRO1 domain-containing protein BROX	35622.4	37269.8	36331.7	38312.2	38419.6	36548	34691.2	31009.1	-0.040502	-0.00624144	-0.190365
sp|P37040|NCPR_MOUSE	P37040	NCPR_MOUSE	Por	NADPH--cytochrome P450 reductase	34785.7	37020.5	41517.5	37942.5	37565.5	36303	33846.7	28835	-0.04085	0.10527	-0.236916
tr|F6Y616|F6Y616_MOUSE	F6Y616	F6Y616_MOUSE	Paip1	Polyadenylate-binding protein-interacting protein 1	37351.1	36447.8	35771.9	37880.5	39658.4	36260.6	32422.9	36212.5	-0.0408604	-0.0437267	-0.145508
sp|P61358|RL27_MOUSE	P61358	RL27_MOUSE	Rpl27	60S ribosomal protein L27	39447.4	37426.7	34614.2	38022.5	37790.4	41295.5	31310	27314.2	-0.0409235	-0.122721	-0.431922
sp|Q99PM3|TF2AA_MOUSE	Q99PM3	TF2AA_MOUSE	Gtf2a1	Transcription initiation factor IIA subunit 1	33383	35523	31028.3	47127.6	29759.6	41131.2	35816.1	32907.7	-0.0409682	0.140756	-0.0447907
sp|Q8CGP1|H2B1K_MOUSE	Q8CGP1	H2B1K_MOUSE	Hist1h2bk	Histone H2B type 1-K	36161.7	35346.2	42658.7	37222.6	37108	36470	33097.3	35086.4	-0.0411723	0.118583	-0.109847
sp|Q7TT18|MCAF1_MOUSE	Q7TT18	MCAF1_MOUSE	Atf7ip	Activating transcription factor 7-interacting protein 1	25876.3	39629.6	48920.1	38269.1	32392.3	35015	31608.4	45797.6	-0.041279	0.371246	0.199541
sp|P48972|MYBB_MOUSE	P48972	MYBB_MOUSE	Mybl2	Myb-related protein B	34620.2	31089.9	29786.2	28936.3	38601.4	29019.4	52886.1	48772.3	-0.041351	-0.203551	0.58819
sp|P10126|EF1A1_MOUSE	P10126	EF1A1_MOUSE	Eef1a1	Elongation factor 1-alpha 1	35109	42083.6	30755.7	40424.1	36892.4	42563	29530.5	30115.6	-0.0416847	-0.158678	-0.413717
sp|Q00547|HMMR_MOUSE	Q00547	HMMR_MOUSE	Hmmr	Hyaluronan mediated motility receptor	36905.1	33879	41063.3	35542.4	40373	32501.7	41399.5	37090.8	-0.041994	0.0720351	0.107097
sp|P35822|PTPRK_MOUSE	P35822	PTPRK_MOUSE	Ptprk	Receptor-type tyrosine-protein phosphatase kappa	27041.2	46459.3	43357.8	31777.2	37462.9	38217.9	31766.6	35841.3	-0.0421709	-0.0104413	-0.162735
sp|Q6PAR5|GAPD1_MOUSE	Q6PAR5	GAPD1_MOUSE	Gapvd1	GTPase-activating protein and VPS9 domain-containing protein 1	33866.8	38267.6	33575.9	38892.7	36417.6	37869.8	34038.4	34457.7	-0.0424304	-0.0357623	-0.117096
sp|Q01147|CREB1_MOUSE	Q01147	CREB1_MOUSE	Creb1	Cyclic AMP-responsive element-binding protein 1	33940	37617.9	31313.4	37219.7	31258.9	42445.8	33026.2	46452.4	-0.0426441	-0.104955	0.10881
sp|Q99JY9|ARP3_MOUSE	Q99JY9	ARP3_MOUSE	Actr3	Actin-related protein 3	40586.7	35529.6	33431.4	40540	39083.5	39317.2	30814.5	24347.8	-0.0426596	-0.083899	-0.507185
sp|Q8K363|DDX18_MOUSE	Q8K363	DDX18_MOUSE	Ddx18	ATP-dependent RNA helicase DDX18	36996	34051.8	37425.3	37050.9	36542.1	36638	38147.9	34364.5	-0.042664	0.0253278	-0.0132249
sp|Q9D0J4|ARL2_MOUSE	Q9D0J4	ARL2_MOUSE	Arl2	ADP-ribosylation factor-like protein 2	37527.2	36227.1	37991.8	34735.6	39672	36297.3	36693.6	32324.7	-0.0426882	-0.0629192	-0.138439
sp|Q99LD4|CSN1_MOUSE	Q99LD4	CSN1_MOUSE	Gps1	COP9 signalosome complex subunit 1	34037.5	36481.6	45037	29631	40101.6	32538.9	36931.3	33112.1	-0.0427609	0.0397159	-0.0525246
sp|Q9JLJ2|AL9A1_MOUSE	Q9JLJ2	AL9A1_MOUSE	Aldh9a1	4-trimethylaminobutyraldehyde dehydrogenase	42726.9	32715.1	42702	29646.6	42183.3	35531.7	39576.7	26482.6	-0.0428275	-0.103228	-0.234432
sp|Q62241|RU1C_MOUSE	Q62241	RU1C_MOUSE	Snrpc	U1 small nuclear ribonucleoprotein C	20961	15771.8	15972.8	15092.9	18578.3	19261.3	95942.9	123690	-0.0428279	-0.284572	2.53713
sp|Q8BH58|TIPRL_MOUSE	Q8BH58	TIPRL_MOUSE	Tiprl	TIP41-like protein	41536.7	34299.4	48189.4	28650.1	44942.9	33179.4	37868.4	27735.1	-0.0428499	-0.0238867	-0.251962
sp|Q8BIQ5|CSTF2_MOUSE	Q8BIQ5	CSTF2_MOUSE	Cstf2	Cleavage stimulation factor subunit 2	28757.4	21571.3	27931.9	23344.5	27721.4	24132.4	67889.4	89514	-0.0430682	-0.0161545	1.60194
sp|B2RR83|YTDC2_MOUSE	B2RR83	YTDC2_MOUSE	Ythdc2	Probable ATP-dependent RNA helicase YTHDC2	32308.5	37176.4	37641.5	41007.9	36147.2	35444.6	35890.7	35374.4	-0.0430977	0.13564	-0.00659929
sp|Q9R0B9|PLOD2_MOUSE	Q9R0B9	PLOD2_MOUSE	Plod2	Procollagen-lysine,2-oxoglutarate 5-dioxygenase 2	39775.9	38347.8	31772.8	33807.9	42346.3	38155.6	36104	24925.1	-0.0432642	-0.295752	-0.399527
sp|Q9QXB9|DRG2_MOUSE	Q9QXB9	DRG2_MOUSE	Drg2	Developmentally-regulated GTP-binding protein 2	34457.5	38892.2	37440.1	34439	37500.1	38083	39644.7	33735.4	-0.0432716	-0.07249	-0.0426725
sp|Q8BP47|SYNC_MOUSE	Q8BP47	SYNC_MOUSE	Nars	Asparagine--tRNA ligase, cytoplasmic	38538.4	33948.7	39538.1	38319.9	37156.8	37543.6	36017.4	32739.4	-0.0433925	0.0597289	-0.119612
sp|Q9CZU4|ERAL1_MOUSE	Q9CZU4	ERAL1_MOUSE	Eral1	GTPase Era, mitochondrial	36607.7	34819.9	45095.7	27610.6	46215.8	27404.1	41536	37536.7	-0.043614	-0.0180147	0.103084
sp|P38060|HMGCL_MOUSE	P38060	HMGCL_MOUSE	Hmgcl	Hydroxymethylglutaryl-CoA lyase, mitochondrial	32603.4	33816.3	62165.4	42818.9	33868.7	34594.2	36820.2	30562.6	-0.0437098	0.616781	-0.0229404
sp|A3KGV1|ODFP2_MOUSE	A3KGV1	ODFP2_MOUSE	Odf2	Outer dense fiber protein 2	41941.1	34018	34873.6	34411	37615.8	40694.4	30484.5	42216.6	-0.0439764	-0.176667	-0.107224
sp|P62484|ABI2_MOUSE	P62484	ABI2_MOUSE	Abi2	Abl interactor 2	33999.4	37176.8	34276.4	41659.9	35368.8	38015.3	31237.4	40354.8	-0.0440744	0.0493206	-0.0356667
sp|O35900|LSM2_MOUSE	O35900	LSM2_MOUSE	Lsm2	U6 snRNA-associated Sm-like protein LSm2	31983.5	29058.4	26894.5	29104.1	34232.1	28705.7	56652.8	58871.2	-0.0441246	-0.168535	0.876196
sp|Q99104|MYO5A_MOUSE	Q99104	MYO5A_MOUSE	Myo5a	Unconventional myosin-Va	33184.6	36601.8	45761.8	29968.1	35872.9	36082.3	40422.3	36659.6	-0.0441537	0.0737626	0.0992934
sp|P80313|TCPH_MOUSE	P80313	TCPH_MOUSE	Cct7	T-complex protein 1 subunit eta	41283.2	33982.1	39256.7	33244	42738.1	34866.6	36286.1	29254.9	-0.0441611	-0.0981499	-0.243746
sp|Q9QY36|NAA10_MOUSE	Q9QY36	NAA10_MOUSE	Naa10	N-alpha-acetyltransferase 10	23488	50638.1	48741.5	41646.1	30719.2	45725.2	28576	26444.8	-0.0444283	0.241715	-0.474433
sp|Q7TPD0|INT3_MOUSE	Q7TPD0	INT3_MOUSE	Ints3	Integrator complex subunit 3	37359.7	31835.6	33701.5	34364.4	32670.1	38690.7	41986.3	45607.5	-0.0444592	-0.0682021	0.295697
sp|Q9ES70|NEK6_MOUSE	Q9ES70	NEK6_MOUSE	Nek6	Serine/threonine-protein kinase Nek6	35001.6	39609.1	38776.1	35522.1	40072.5	36877.2	36364.1	33261.5	-0.0445327	-0.0505896	-0.144299
sp|Q8K114|INT9_MOUSE	Q8K114	INT9_MOUSE	Ints9	Integrator complex subunit 9	34788.6	30990.3	26823.1	39808.6	35577.1	32268.2	36238	48879.8	-0.0446258	-0.0260403	0.327212
sp|Q80YV4-2|PANK4_MOUSE	Q80YV4-2	PANK4_MOUSE	Pank4	Isoform 2 of Pantothenate kinase 4	38703.9	37508.4	38613.6	35850.4	37363	41244.6	32216.2	34295.9	-0.0446471	-0.0781279	-0.241053
sp|Q11011|PSA_MOUSE	Q11011	PSA_MOUSE	Npepps	Puromycin-sensitive aminopeptidase	40229.7	35775.7	39150	34338.5	40522.9	37888.2	33542.6	30638.1	-0.0449573	-0.0935403	-0.288918
sp|Q3UMG5|LRCH2_MOUSE	Q3UMG5	LRCH2_MOUSE	Lrch2	Leucine-rich repeat and calponin homology domain-containing protein 2	35880.2	41151.2	31741	34423.1	38946.3	40530.5	35092.3	35144.2	-0.0450879	-0.264483	-0.178312
sp|Q9D0M5|DYL2_MOUSE	Q9D0M5	DYL2_MOUSE	Dynll2	Dynein light chain 2, cytoplasmic	37911.3	36567.9	32343.9	36538.9	39540.5	37308.4	34273.2	36095.6	-0.0451872	-0.15788	-0.127089
sp|Q6ZQ03|FNBP4_MOUSE	Q6ZQ03	FNBP4_MOUSE	Fnbp4	Formin-binding protein 4	28984.8	30378.7	32020.4	27423.1	29242.2	32034	54966.6	70625.4	-0.04575	-0.0438071	1.03535
tr|Q8CIH9|Q8CIH9_MOUSE	Q8CIH9	Q8CIH9_MOUSE	Ppat	Amidophosphoribosyltransferase	39073	33313.9	37872.5	35497.2	39852.6	34879.3	38744.7	30154.3	-0.0459963	-0.0265392	-0.117242
sp|Q5SW19|CLU_MOUSE	Q5SW19	CLU_MOUSE	Cluh	Clustered mitochondria protein homolog	35554.4	38803.9	38621.4	35911.4	38480.6	38303.1	31462.5	34420.2	-0.0463061	-0.0429234	-0.220901
sp|O35218|CPSF2_MOUSE	O35218	CPSF2_MOUSE	Cpsf2	Cleavage and polyadenylation specificity factor subunit 2	28779.4	25153.3	30126.7	28871.9	27188.2	28508.1	61188.2	74286.9	-0.0464194	0.0830999	1.28238
sp|Q80T85|DCAF5_MOUSE	Q80T85	DCAF5_MOUSE	Dcaf5	DDB1- and CUL4-associated factor 5	36581.8	32742.5	36274.5	39951.2	36767.4	34831.9	35320.4	40905	-0.0465851	0.0903327	0.0903253
sp|P50516|VATA_MOUSE	P50516	VATA_MOUSE	Atp6v1a	V-type proton ATPase catalytic subunit A	32959.9	38669.7	37157.6	38295	37296.5	36689.2	31922.6	38633.6	-0.0466895	0.0283223	-0.0684743
sp|O35344|IMA4_MOUSE	O35344	IMA4_MOUSE	Kpna3	Importin subunit alpha-4	39616.7	32275.2	30783.6	31455.5	37179	37095.6	41063.1	42090.2	-0.0470396	-0.255047	0.162905
sp|Q99LI8|HGS_MOUSE	Q99LI8	HGS_MOUSE	Hgs	Hepatocyte growth factor-regulated tyrosine kinase substrate	29926.1	43453.7	32578.7	37906.3	39095.4	36719.5	34275.4	32826.6	-0.0471002	-0.105166	-0.176126
sp|Q9Z0N1|IF2G_MOUSE	Q9Z0N1	IF2G_MOUSE	Eif2s3x	Eukaryotic translation initiation factor 2 subunit 3, X-linked	38897.6	32085.8	36430.2	34832.5	37810.5	35535.6	41728.4	31548	-0.047239	-0.0415733	-0.00137141
sp|P14576|SRP54_MOUSE	P14576	SRP54_MOUSE	Srp54	Signal recognition particle 54 kDa protein	43745.4	34622.2	31258.8	37672.8	42794.2	38185.7	34231.9	21004.2	-0.0473056	-0.232399	-0.551952
sp|Q9R190|MTA2_MOUSE	Q9R190	MTA2_MOUSE	Mta2	Metastasis-associated protein MTA2	38609.9	32103.4	38506.1	35674.6	37452.9	35622.6	38584.1	40565	-0.0474046	0.0216571	0.115186
sp|Q9D906|ATG7_MOUSE	Q9D906	ATG7_MOUSE	Atg7	Ubiquitin-like modifier-activating enzyme ATG7	35561.6	41847.7	40464.2	37322.9	37522.8	42476	30036.4	28647.4	-0.0474725	-0.0404491	-0.447018
tr|E9PZF0|E9PZF0_MOUSE	E9PZF0	E9PZF0_MOUSE	Gm20390	Nucleoside diphosphate kinase	28955.3	44258.5	30783.1	46631.7	28077.6	47593.8	27862.7	34232	-0.0476308	0.0328615	-0.285278
sp|P35585|AP1M1_MOUSE	P35585	AP1M1_MOUSE	Ap1m1	AP-1 complex subunit mu-1	35054.3	37724.7	38078.8	37368.6	37762.9	37461.7	32046.7	36933.6	-0.0476831	0.00426678	-0.125019
sp|Q5DW34|EHMT1_MOUSE	Q5DW34	EHMT1_MOUSE	Ehmt1	Histone-lysine N-methyltransferase EHMT1	40777.7	29433.5	27349.2	44500.7	34611.2	37959.7	30192.2	36261.7	-0.0476905	-0.0144069	-0.127038
sp|Q61937|NPM_MOUSE	Q61937	NPM_MOUSE	Npm1	Nucleophosmin	38319.7	37746.2	35106.9	35576.2	39791.7	38835.7	31024.4	29055.6	-0.0477831	-0.153668	-0.388147
sp|O35129|PHB2_MOUSE	O35129	PHB2_MOUSE	Phb2	Prohibitin-2	34401.7	42523.1	30676.8	40240.9	37979.9	41565.1	30615.8	29483.7	-0.0483229	-0.165627	-0.404418
sp|Q8BGQ7|SYAC_MOUSE	Q8BGQ7	SYAC_MOUSE	Aars	Alanine--tRNA ligase, cytoplasmic	36568.2	37918.8	35837.5	37741.7	37562.2	39463.7	34728.8	32564.6	-0.0483571	-0.0660464	-0.19488
sp|Q9D868-2|PPIH_MOUSE	Q9D868-2	PPIH_MOUSE	Ppih	Isoform 2 of Peptidyl-prolyl cis-trans isomerase H	31152.7	36456.9	32067.7	33389.9	37071.8	32844.3	45138.3	44486.8	-0.0483961	-0.0950622	0.358279
sp|P68433|H31_MOUSE	P68433	H31_MOUSE	Hist1h3a	Histone H3.1	31760.3	45717.2	37548.8	37504.7	41167.5	38960.9	35024.4	28836.1	-0.0485355	-0.0943926	-0.327388
sp|Q99ME2|WDR6_MOUSE	Q99ME2	WDR6_MOUSE	Wdr6	WD repeat-containing protein 6	33290.3	41798.7	37538.3	37650.9	36590.4	41101.9	33688.6	32038	-0.0491702	-0.0472472	-0.241296
sp|Q9DBT5|AMPD2_MOUSE	Q9DBT5	AMPD2_MOUSE	Ampd2	AMP deaminase 2	37998.7	33852	39185.2	32837.9	41093.8	33249.5	39510.6	33564.3	-0.0492003	-0.0457415	-0.0248261
sp|Q9DC16|ERGI1_MOUSE	Q9DC16	ERGI1_MOUSE	Ergic1	Endoplasmic reticulum-Golgi intermediate compartment protein 1	36468.5	39708.7	34291.6	34672.3	39986.7	38840.3	34933.4	27803.3	-0.0493315	-0.19285	-0.329382
sp|Q5IRJ6|ZNT9_MOUSE	Q5IRJ6	ZNT9_MOUSE	Slc30a9	Zinc transporter 9	30793.7	44508.6	36238.7	40523.1	36954.4	40977	30695.7	36640	-0.0495109	-0.0218158	-0.210835
sp|Q9Z1E4|GYS1_MOUSE	Q9Z1E4	GYS1_MOUSE	Gys1	Glycogen [starch] synthase, muscle	37754.2	40997.7	35144.8	27304.2	43624.8	37881.3	34970.6	33275.1	-0.0495948	-0.384231	-0.25617
sp|P60710|ACTB_MOUSE	P60710	ACTB_MOUSE	Actb	Actin, cytoplasmic 1	36251.5	38307.4	33724.9	38656.6	38767.3	38413.4	34164.7	28388.2	-0.0498596	-0.0926193	-0.303166
sp|Q8R5H1|UBP15_MOUSE	Q8R5H1	UBP15_MOUSE	Usp15	Ubiquitin carboxyl-terminal hydrolase 15	36645.8	34936.9	41299.9	32950.2	39249.6	34851.1	39252.3	34345.2	-0.0498777	0.00290341	-0.00983192
sp|Q3UJB9|EDC4_MOUSE	Q3UJB9	EDC4_MOUSE	Edc4	Enhancer of mRNA-decapping protein 4	32084.4	38176	39739.8	36451.5	35353.3	37381.5	34731	37112.7	-0.0499332	0.0669827	-0.0177822
sp|P63139|NFYB_MOUSE	P63139	NFYB_MOUSE	Nfyb	Nuclear transcription factor Y subunit beta	32734.5	39152.5	26720.2	30452	43315.2	31107.7	38847.2	47306.9	-0.0500139	-0.380432	0.211174
sp|P63325|RS10_MOUSE	P63325	RS10_MOUSE	Rps10	40S ribosomal protein S10	35632.5	38188.6	33484.5	35067.2	38901.8	37525.2	33622.8	36011.5	-0.0500493	-0.15689	-0.134286
sp|P62313|LSM6_MOUSE	P62313	LSM6_MOUSE	Lsm6	U6 snRNA-associated Sm-like protein LSm6	28113.2	39933.1	27020.6	42197.5	29680.7	40779.1	30393.5	59018	-0.0502846	-0.0256516	0.343659
sp|Q9EQQ9|NCOAT_MOUSE	Q9EQQ9	NCOAT_MOUSE	Mgea5	Bifunctional protein NCOAT	37188.7	35215.9	39979.7	32961.9	42366	32608.9	37026.2	32196.8	-0.0503274	-0.0396659	-0.115157
sp|P26039|TLN1_MOUSE	P26039	TLN1_MOUSE	Tln1	Talin-1	36542.5	36053.4	38420.5	35982	38142.2	37032.8	36110.1	33673.2	-0.0503663	-0.0149014	-0.107372
sp|P54227|STMN1_MOUSE	P54227	STMN1_MOUSE	Stmn1	Stathmin	39852.7	32923.6	41289.5	38645	38296	37075.4	35299.4	29743.2	-0.0505472	0.084803	-0.212631
sp|Q3TC93|H1BP3_MOUSE	Q3TC93	H1BP3_MOUSE	Hs1bp3	HCLS1-binding protein 3	40922	33042.6	35777.1	44988.1	37356.8	39277.3	34253.4	22288.3	-0.0511529	0.0757468	-0.438671
sp|Q8BUV3|GEPH_MOUSE	Q8BUV3	GEPH_MOUSE	Gphn	Gephyrin	35797.9	38408.9	40086.4	35691	40970.4	35938.1	36470.8	27537.6	-0.0515923	-0.0213764	-0.264883
sp|P58501|PAXB1_MOUSE	P58501	PAXB1_MOUSE	Paxbp1	PAX3- and PAX7-binding protein 1	24861.2	21627.3	24459.9	23042.3	23048.6	25132.8	74121.4	93962.5	-0.0516037	-0.0204834	1.80263
sp|O88544|CSN4_MOUSE	O88544	CSN4_MOUSE	Cops4	COP9 signalosome complex subunit 4	35070.9	36096.7	35168.2	35685.9	37797	35963.3	37932.4	38392.6	-0.0516242	-0.0579937	0.0493095
sp|Q99J95|CDK9_MOUSE	Q99J95	CDK9_MOUSE	Cdk9	Cyclin-dependent kinase 9	34787.5	27740.5	39067.4	30092.8	34499.6	30308.9	41814.7	53754.5	-0.0516794	0.0937603	0.560363
sp|Q61768|KINH_MOUSE	Q61768	KINH_MOUSE	Kif5b	Kinesin-1 heavy chain	36113.8	34976.5	39475	37623.7	36295.6	37389.3	33959.5	33915.3	-0.0517164	0.0653376	-0.118494
sp|Q9JLV5|CUL3_MOUSE	Q9JLV5	CUL3_MOUSE	Cul3	Cullin-3	38439.3	34281.7	32213.4	37881.7	37797	37582.3	36085.8	35169.6	-0.0517953	-0.104854	-0.0811684
sp|O88513|GEMI_MOUSE	O88513	GEMI_MOUSE	Gmnn	Geminin	31934.9	40283.8	37889.1	38714.7	34940.6	39928.8	34389.2	30801.3	-0.0520042	0.0330379	-0.199714
sp|Q3B7Z2|OSBP1_MOUSE	Q3B7Z2	OSBP1_MOUSE	Osbp	Oxysterol-binding protein 1	42106.9	36903.7	31625	40749.7	38072.2	43860.9	27540.5	25967.8	-0.0524015	-0.178962	-0.614683
sp|Q4KMM3|OXR1_MOUSE	Q4KMM3	OXR1_MOUSE	Oxr1	Oxidation resistance protein 1	37325.6	36827.9	33042.2	32924.4	34151	42748.4	37009.9	38216.8	-0.0524577	-0.221236	-0.0317275
sp|Q99KP6|PRP19_MOUSE	Q99KP6	PRP19_MOUSE	Prpf19	Pre-mRNA-processing factor 19	25463.8	21686.3	26328.6	20727.9	27739	21157.5	75149.1	92967.1	-0.0524731	-0.0553383	1.78165
sp|Q8BHG1|NRDC_MOUSE	Q8BHG1	NRDC_MOUSE	Nrd1	Nardilysin	33443.3	37613.2	39214	36176.7	38181.2	35510.1	38764.6	33816.8	-0.0525289	0.0328911	-0.0218965
sp|Q8K4P0|WDR33_MOUSE	Q8K4P0	WDR33_MOUSE	Wdr33	pre-mRNA 3' end processing protein WDR33	22993.6	25253.2	18839.6	20955.2	24870	25173.7	72785.6	99580.6	-0.0527541	-0.330609	1.78422
sp|G3XA57|RFIP2_MOUSE	G3XA57	RFIP2_MOUSE	Rab11fip2	Rab11 family-interacting protein 2	36647.4	35258.7	28802	45586	35270.5	39323.4	29602	40788.9	-0.0529423	-0.00398805	-0.0836679
sp|P84078|ARF1_MOUSE	P84078	ARF1_MOUSE	Arf1	ADP-ribosylation factor 1	35712.9	38091.4	31732.8	39019	37373.8	39192.1	32775.7	35832.3	-0.0529952	-0.113934	-0.158323
sp|P46737|BRCC3_MOUSE	P46737	BRCC3_MOUSE	Brcc3	Lys-63-specific deubiquitinase BRCC36	42475	30329.9	39507.6	31621.8	44456.3	31076	38961.9	29024.5	-0.0530598	-0.0866493	-0.151848
sp|Q6PGC1|DHX29_MOUSE	Q6PGC1	DHX29_MOUSE	Dhx29	ATP-dependent RNA helicase Dhx29	39042.6	35664.1	39620.4	36383.4	35900.9	41605.3	32304.3	28696.6	-0.0530747	-0.0282407	-0.345481
tr|Q6PHQ9|Q6PHQ9_MOUSE	Q6PHQ9	Q6PHQ9_MOUSE	Pabpc4	MCG5546, isoform CRA_c	36611.9	38255.3	33538.4	36106.2	38903.9	38769.7	33604.2	29725.2	-0.053091	-0.157412	-0.294547
sp|Q922M7|ASHWN_MOUSE	Q922M7	ASHWN_MOUSE	>sp|Q922M7|ASHWN_MOUSE	n/a	36452.4	31548.5	37445.2	40135.3	34301.6	36258	37218.6	35811.6	-0.0532881	0.136851	0.0496504
sp|Q9JKB1|UCHL3_MOUSE	Q9JKB1	UCHL3_MOUSE	Uchl3	Ubiquitin carboxyl-terminal hydrolase isozyme L3	34636.1	37808.5	37112	38376.4	35770.7	39417.5	32809.8	33203.5	-0.0536278	0.00574871	-0.187751
sp|Q91V64|ISOC1_MOUSE	Q91V64	ISOC1_MOUSE	Isoc1	Isochorismatase domain-containing protein 1	36212.6	38478.3	40865.9	34011.3	39308.4	38218.5	29869.5	30638.9	-0.053764	-0.050168	-0.357561
sp|Q9CZT4|RPC5_MOUSE	Q9CZT4	RPC5_MOUSE	Polr3e	DNA-directed RNA polymerase III subunit RPC5	34073	38670.5	34005.5	40547.1	35319	40189.2	34153.2	33930.5	-0.0538137	-0.0183741	-0.149322
sp|Q9CYR6|AGM1_MOUSE	Q9CYR6	AGM1_MOUSE	Pgm3	Phosphoacetylglucosamine mutase	42176.1	34038.9	27865.7	30687.7	38860.8	40279.1	37879.4	31795.6	-0.0543314	-0.434653	-0.183764
sp|Q921M3|SF3B3_MOUSE	Q921M3	SF3B3_MOUSE	Sf3b3	Splicing factor 3B subunit 3	26707.7	28221.1	27285.6	25000.3	28641.7	28399.1	61362.3	76694.5	-0.0544325	-0.125574	1.27519
sp|P29341|PABP1_MOUSE	P29341	PABP1_MOUSE	Pabpc1	Polyadenylate-binding protein 1	35556.2	37227.5	36097.4	36046.8	36628	38958.1	34079.1	34129.2	-0.0545052	-0.0672379	-0.148174
sp|Q07076|ANXA7_MOUSE	Q07076	ANXA7_MOUSE	Anxa7	Annexin A7	33241	33320.8	38344.8	31869.4	36390.6	32745.4	47022.8	39695.6	-0.0547442	0.022326	0.326902
sp|Q61823|PDCD4_MOUSE	Q61823	PDCD4_MOUSE	Pdcd4	Programmed cell death protein 4	39765.4	36032.5	48047.9	30524.3	40203.4	38526.2	43501.3	28127.7	-0.054748	-0.00288681	-0.136361
sp|Q9D892|ITPA_MOUSE	Q9D892	ITPA_MOUSE	Itpa	Inosine triphosphate pyrophosphatase	37495.3	33922.7	37222.9	37821.6	38431.8	35756.4	37252.1	31513.2	-0.0548998	0.0165568	-0.109508
sp|Q8BRN9|C2D1B_MOUSE	Q8BRN9	C2D1B_MOUSE	Cc2d1b	Coiled-coil and C2 domain-containing protein 1B	34722.6	37371.2	36640.2	39219.5	40516	34392.1	37687.6	32208.9	-0.0552475	0.0182119	-0.0999016
sp|Q9CQD1|RAB5A_MOUSE	Q9CQD1	RAB5A_MOUSE	Rab5a	Ras-related protein Rab-5A	40063.6	34837.8	41493.7	32413.6	40490.3	37341.6	34259.1	30033.1	-0.0553706	-0.074646	-0.275717
sp|Q62465|VAT1_MOUSE	Q62465	VAT1_MOUSE	Vat1	Synaptic vesicle membrane protein VAT-1 homolog	40282	34223.5	30876.1	36345.9	37171	40264.7	31856.4	29995.9	-0.0556532	-0.204068	-0.324173
sp|P52432|RPAC1_MOUSE	P52432	RPAC1_MOUSE	Polr1c	DNA-directed RNA polymerases I and III subunit RPAC1	35491.8	37382.9	33718.9	37197	37846.9	37894.5	33382.8	36335.7	-0.0556633	-0.0949734	-0.119541
sp|Q3TEA8|HP1B3_MOUSE	Q3TEA8	HP1B3_MOUSE	Hp1bp3	Heterochromatin protein 1-binding protein 3	38603.7	36977.2	37171.9	38757.7	38320.7	40268.3	31970.5	25672.2	-0.0563048	-0.0496633	-0.447188
sp|Q91ZW3|SMCA5_MOUSE	Q91ZW3	SMCA5_MOUSE	Smarca5	SWI/SNF-related matrix-associated actin-dependent regulator of chromatin subfamily A member 5	35428.6	36194.4	35169.3	33249.1	36684.1	37799.4	37923.3	43039.6	-0.056499	-0.122537	0.12034
sp|P19324|SERPH_MOUSE	P19324	SERPH_MOUSE	Serpinh1	Serpin H1	37860.9	31607.3	49633.2	32993.1	40424	31819.4	40741.9	28717.9	-0.0565134	0.193736	-0.0566868
sp|Q6PD10|IP6K1_MOUSE	Q6PD10	IP6K1_MOUSE	Ip6k1	Inositol hexakisphosphate kinase 1	38928.8	34496.4	52754.2	38234.9	36859.6	39503.1	33094.3	25891.3	-0.0565909	0.252826	-0.372505
sp|O35857|TIM44_MOUSE	O35857	TIM44_MOUSE	Timm44	Mitochondrial import inner membrane translocase subunit TIM44	38220	38897.1	30536	39576.8	39074.3	41130.5	30152	28147.8	-0.0566387	-0.194013	-0.4602
sp|Q7TPV4|MBB1A_MOUSE	Q7TPV4	MBB1A_MOUSE	Mybbp1a	Myb-binding protein 1A	32542.6	29878.8	32370.4	29818.5	34889.2	30034.4	50903.7	57134.1	-0.0567022	-0.0620851	0.734722
sp|Q8C0N2|GPAT3_MOUSE	Q8C0N2	GPAT3_MOUSE	Agpat9	Glycerol-3-phosphate acyltransferase 3	30864.4	32223.4	42156.5	35423.6	29833.6	35783.4	47996.4	49302.8	-0.0567074	0.241617	0.568358
sp|Q8R3N6|THOC1_MOUSE	Q8R3N6	THOC1_MOUSE	Thoc1	THO complex subunit 1	28696	30237.1	26847.9	25317.8	31880.8	29424.8	56679.1	70122.5	-0.0569407	-0.232916	1.04848
sp|Q8K1M6|DNM1L_MOUSE	Q8K1M6	DNM1L_MOUSE	Dnm1l	Dynamin-1-like protein	35580.2	38912.4	31285.4	40094.6	38314.1	39179.2	31170.5	33081	-0.0569744	-0.118551	-0.270342
sp|Q3UMW7|MAPK3_MOUSE	Q3UMW7	MAPK3_MOUSE	Mapkapk3	MAP kinase-activated protein kinase 3	31638.8	37928	42615.1	28213.8	46781.3	25588	33627.7	31423	-0.0569789	-0.0310396	-0.153813
sp|Q9CZW4|ACSL3_MOUSE	Q9CZW4	ACSL3_MOUSE	Acsl3	Long-chain-fatty-acid--CoA ligase 3	36228.9	38682.2	33648.7	36438.1	41539.4	36397.6	35936.6	29233.2	-0.0571284	-0.153165	-0.258102
sp|Q6ZWZ2|UB2R2_MOUSE	Q6ZWZ2	UB2R2_MOUSE	Ube2r2	Ubiquitin-conjugating enzyme E2 R2	35237.7	40351	35484.8	36980.1	38635.2	40018.2	32218.5	31778.6	-0.0573377	-0.118227	-0.297502
sp|P97447|FHL1_MOUSE	P97447	FHL1_MOUSE	Fhl1	Four and a half LIM domains protein 1	35942.5	35038.4	33109.8	33599	36500.1	37370.5	37756.6	46066.5	-0.0575706	-0.147123	0.182347
sp|Q6ZPZ3|ZC3H4_MOUSE	Q6ZPZ3	ZC3H4_MOUSE	Zc3h4	Zinc finger CCCH domain-containing protein 4	22197	30105.9	30994.7	31008	25504.4	28929.3	48904.2	91086.5	-0.057609	0.187831	1.36276
sp|Q3V009|TMED1_MOUSE	Q3V009	TMED1_MOUSE	Tmed1	Transmembrane emp24 domain-containing protein 1	28736.8	48889.1	34485.4	28688.5	41976.3	38815.6	34093.5	37905.8	-0.0576726	-0.354882	-0.166228
sp|P83741|WNK1_MOUSE	P83741	WNK1_MOUSE	Wnk1	Serine/threonine-protein kinase WNK1	35640.3	39003.2	34919.5	41690.4	39423.5	38264.9	33017	27445.7	-0.0576829	-0.0201695	-0.361655
sp|Q62311|TAF6_MOUSE	Q62311	TAF6_MOUSE	Taf6	Transcription initiation factor TFIID subunit 6	36132.3	33562.6	41660.4	38969	34409.2	38128.9	38546.8	36702.5	-0.0576865	0.152567	0.0529394
sp|Q923G2|RPAB3_MOUSE	Q923G2	RPAB3_MOUSE	Polr2h	DNA-directed RNA polymerases I, II, and III subunit RPABC3	33199.1	36948.1	35194.2	36707.7	36538.6	36474.3	38417	36385.2	-0.0577686	-0.0221224	0.034926
sp|Q6P9Q4|FHOD1_MOUSE	Q6P9Q4	FHOD1_MOUSE	Fhod1	FH1/FH2 domain-containing protein 1	40447.4	33800.2	30496.4	33727.4	46604	30684.5	37609.5	18653.3	-0.0579102	-0.267148	-0.458074
sp|Q3UEB3-2|PUF60_MOUSE	Q3UEB3-2	PUF60_MOUSE	Puf60	Isoform 2 of Poly(U)-binding-splicing factor PUF60	25866.6	26993.4	24876.2	26006	29227.8	25798.5	63844.4	84535.5	-0.0579444	-0.11296	1.4311
sp|Q80UG5|SEPT9_MOUSE	Q80UG5	SEPT9_MOUSE	42256	Septin-9	34631.7	38173.1	39975	38730.5	35476.7	40321.4	31255.5	35810.6	-0.0581288	0.0543035	-0.176577
sp|Q9CR62|M2OM_MOUSE	Q9CR62	M2OM_MOUSE	Slc25a11	Mitochondrial 2-oxoglutarate/malate carrier protein	32164.7	42820.4	27896.8	43884.9	37592	40487.5	28606.6	27900.5	-0.0583401	-0.121328	-0.466512
tr|B2RXC6|B2RXC6_MOUSE	B2RXC6	B2RXC6_MOUSE	Polr3a	DNA-directed RNA polymerase	37248.2	34018.6	38046.8	34701.7	39448.4	34762.3	36609.1	34589.1	-0.0583989	-0.0287124	-0.0597887
sp|Q8BX70|VP13C_MOUSE	Q8BX70	VP13C_MOUSE	Vps13c	Vacuolar protein sorting-associated protein 13C	35061.4	39345.4	35894.4	35035.2	38487.6	39008.5	35623.6	37695.1	-0.0586888	-0.127735	-0.0799445
sp|P60824|CIRBP_MOUSE	P60824	CIRBP_MOUSE	Cirbp	Cold-inducible RNA-binding protein	33871.2	32188.8	29841.8	34715	33264.6	35540	44336.6	49951.5	-0.0587297	-0.091937	0.454569
sp|Q9D1N9|RM21_MOUSE	Q9D1N9	RM21_MOUSE	Mrpl21	39S ribosomal protein L21, mitochondrial	15743.5	17452.2	51644.3	121065	18062.5	16512.8	15473.4	18504.3	-0.0587479	2.32054	-0.025152
sp|Q9QUJ7|ACSL4_MOUSE	Q9QUJ7	ACSL4_MOUSE	Acsl4	Long-chain-fatty-acid--CoA ligase 4	34074.4	39970.7	31674.3	37292.7	40594.5	36536	32452.5	31233.7	-0.0588971	-0.161395	-0.27632
sp|Q9JHC9|ELF2_MOUSE	Q9JHC9	ELF2_MOUSE	Elf2	ETS-related transcription factor Elf-2	35355.4	36967.8	37768.4	35603.6	39005.6	36333.9	36858	36435.9	-0.0589468	-0.0381767	-0.0397125
sp|P54775|PRS6B_MOUSE	P54775	PRS6B_MOUSE	Psmc4	26S protease regulatory subunit 6B	35225.2	36994.7	36442.3	39826.5	36728.3	38509.9	36121.2	27808.8	-0.0590694	0.0196274	-0.234972
sp|P61759|PFD3_MOUSE	P61759	PFD3_MOUSE	Vbp1	Prefoldin subunit 3	30362.1	45811.4	25197.2	38158	35099.3	44267.8	30041.3	36563.9	-0.0592531	-0.325078	-0.252907
sp|Q8K409|DPOLB_MOUSE	Q8K409	DPOLB_MOUSE	Polb	DNA polymerase beta	31554.3	41399.1	25683	28799.6	33535.2	42495.9	34945.1	61305.7	-0.0596154	-0.480793	0.340209
sp|Q3UXZ9|KDM5A_MOUSE	Q3UXZ9	KDM5A_MOUSE	Kdm5a	Lysine-specific demethylase 5A	33326.1	31431.9	37138.7	33883.6	32622.9	34874.6	42278.7	45919.5	-0.0597786	0.0734367	0.385914
sp|O88342|WDR1_MOUSE	O88342	WDR1_MOUSE	Wdr1	WD repeat-containing protein 1	36059.5	40423.6	41388.8	27808.2	40102.3	39617.4	35547.5	28930.3	-0.0597952	-0.204226	-0.306134
sp|Q6A0A2|LAR4B_MOUSE	Q6A0A2	LAR4B_MOUSE	Larp4b	La-related protein 4B	46342.8	30070.4	41592.1	28445.6	44746.3	34906.7	36407.7	31121.5	-0.059907	-0.185597	-0.238217
sp|Q9EP71|RAI14_MOUSE	Q9EP71	RAI14_MOUSE	Rai14	Ankycorbin	33740.3	38501.4	41392.8	37320.3	36061.3	39257	30319.7	31599.9	-0.0601685	0.0636012	-0.282604
sp|Q9EP97|SENP3_MOUSE	Q9EP97	SENP3_MOUSE	Senp3	Sentrin-specific protease 3	35484.4	38849.6	30132.6	39235.1	39310.8	38195.7	35452.5	25366.9	-0.0602939	-0.160052	-0.349785
sp|Q8BVI4|DHPR_MOUSE	Q8BVI4	DHPR_MOUSE	Qdpr	Dihydropteridine reductase	44317.7	30400.2	32679.7	43671.4	34815.3	43095.3	30659.4	27063.8	-0.0603676	-0.0291716	-0.43267
sp|Q02248|CTNB1_MOUSE	Q02248	CTNB1_MOUSE	Ctnnb1	Catenin beta-1	38331.7	36955.2	40697.9	35819.2	40307.1	38203	33915.6	31874.6	-0.0604802	-0.037096	-0.255006
sp|Q3UMU9|HDGR2_MOUSE	Q3UMU9	HDGR2_MOUSE	Hdgfrp2	Hepatoma-derived growth factor-related protein 2	36505	39395.3	25962	31494.2	40598.9	38557.8	37659.9	38432.3	-0.0606058	-0.462248	-0.056963
sp|Q9JMA2|TGT_MOUSE	Q9JMA2	TGT_MOUSE	Qtrt1	Queuine tRNA-ribosyltransferase	37578.7	33212.8	37777.5	35045.4	39482.2	34350.1	41171.5	35736.8	-0.0606749	-0.0198602	0.0588892
sp|Q3URQ0|TEX10_MOUSE	Q3URQ0	TEX10_MOUSE	Tex10	Testis-expressed sequence 10 protein	35716.3	32546.7	33434.8	41097.1	35521.9	35673.7	36318.9	41329.2	-0.060682	0.0660705	0.125165
sp|P61982|1433G_MOUSE	P61982	1433G_MOUSE	Ywhag	14-3-3 protein gamma	41416.6	32714.9	46946.3	31159.3	41888.8	35466.8	33269	37498.4	-0.0614175	0.0139212	-0.128421
sp|O08810|U5S1_MOUSE	O08810	U5S1_MOUSE	Eftud2	116 kDa U5 small nuclear ribonucleoprotein component	26034.2	27300.5	24720.9	26856	27614.1	28049.8	60893.1	84211.2	-0.0616687	-0.110017	1.38228
sp|Q62419|SH3G1_MOUSE	Q62419	SH3G1_MOUSE	Sh3gl1	Endophilin-A2	34894.9	33869.6	42084.5	36846.9	34453.1	37323.4	34642.5	42570.4	-0.0618468	0.137088	0.10533
sp|O35691|PININ_MOUSE	O35691	PININ_MOUSE	Pnn	Pinin	27167.9	24545.8	24077.8	26183.1	26165.6	27828.4	65520	87925.7	-0.0622545	-0.103365	1.50686
sp|Q8K2C9|HACD3_MOUSE	Q8K2C9	HACD3_MOUSE	ptplad1	Very-long-chain (3R)-3-hydroxyacyl-CoA dehydratase 3	38550.5	35259.7	36371.4	39198.7	42465.9	34603.2	33533	31857.4	-0.062332	-0.0283365	-0.237075
sp|P84089|ERH_MOUSE	P84089	ERH_MOUSE	Erh	Enhancer of rudimentary homolog	23365.4	19784.6	22363.7	21822.7	26973.8	18083.5	85319.3	90704.8	-0.0623999	-0.0281611	1.96594
sp|P28741|KIF3A_MOUSE	P28741	KIF3A_MOUSE	Kif3a	Kinesin-like protein KIF3A	38919.8	34906.4	37931	38404.8	38571.9	38517.9	32232.2	27714.4	-0.0624081	-0.014181	-0.362862
tr|Q68FG2|Q68FG2_MOUSE	Q68FG2	Q68FG2_MOUSE	Sptbn2	Protein Sptbn2	35395.1	39666.2	42263.1	39104.6	35623.9	42756.6	30164.9	32798.8	-0.0624263	0.0539612	-0.315975
sp|Q8CH18|CCAR1_MOUSE	Q8CH18	CCAR1_MOUSE	Ccar1	Cell division cycle and apoptosis regulator protein 1	30256.4	27063.2	30864.4	29130.6	30415.8	29445.1	55088.2	72871.9	-0.0625866	0.0032292	1.09601
sp|P16546|SPTN1_MOUSE	P16546	SPTN1_MOUSE	Sptan1	Spectrin alpha chain, non-erythrocytic 1	38015.5	36864.3	37979	36213.6	39340.6	38870	32967.8	27086.9	-0.0627868	-0.0760885	-0.381088
sp|P19426|NELFE_MOUSE	P19426	NELFE_MOUSE	Nelfe	Negative elongation factor E	39233.5	29212	40988.4	34370	37805.8	33698	41164.1	39893.9	-0.0630652	0.0757474	0.180935
sp|Q8CI33|C19L1_MOUSE	Q8CI33	C19L1_MOUSE	Cwf19l1	CWF19-like protein 1	34587.9	32709.8	34677	34686.2	35604.1	34704.1	41891	45186.4	-0.0631345	-0.0195231	0.308605
sp|Q9WTU0|PHF2_MOUSE	Q9WTU0	PHF2_MOUSE	Phf2	Lysine-specific demethylase PHF2	41659.4	29822.8	38582.5	30303.9	42746.1	31934.8	35227	31583.6	-0.0631555	-0.116519	-0.160661
sp|O88958|GNPI1_MOUSE	O88958	GNPI1_MOUSE	Gnpda1	Glucosamine-6-phosphate isomerase 1	31703.3	42788.7	39029.8	43995.4	32532.2	45299.5	24816.2	31951.8	-0.063273	0.0931904	-0.455283
sp|O70566|DIAP2_MOUSE	O70566	DIAP2_MOUSE	Diaph2	Protein diaphanous homolog 2	27773.5	48462.3	36094	43993.8	31585.9	48071.5	24037.1	37330.3	-0.0633387	0.00777462	-0.376336
sp|P62908|RS3_MOUSE	P62908	RS3_MOUSE	Rps3	40S ribosomal protein S3	36993.2	37889.1	37358.8	38519.4	39230	39015.8	30850.2	27879.3	-0.0633908	-0.0443286	-0.413929
sp|P63154|CRNL1_MOUSE	P63154	CRNL1_MOUSE	Crnkl1	Crooked neck-like protein 1	24038.6	23162.1	25963.1	23809.8	24759.8	24569.6	72744.7	92358.7	-0.063641	0.0129116	1.74285
sp|Q99ME9|NOG1_MOUSE	Q99ME9	NOG1_MOUSE	Gtpbp4	Nucleolar GTP-binding protein 1	39505.6	35981.7	33089.1	38008.2	39057.8	39836.8	35187.6	26861.4	-0.0636927	-0.150131	-0.346517
sp|O88967|YMEL1_MOUSE	O88967	YMEL1_MOUSE	Yme1l1	ATP-dependent zinc metalloprotease YME1L1	31503.6	36708.5	31626.4	42095.6	36735.5	34561.6	34373	36554.8	-0.0638156	0.0482508	-0.0074913
sp|Q9DBX2|PHLP_MOUSE	Q9DBX2	PHLP_MOUSE	Pdcl	Phosducin-like protein	36779.2	31299.7	43323.1	33775.1	33143.2	38025.9	38905.1	39296.1	-0.0640425	0.115447	0.13594
sp|O08582|GTPB1_MOUSE	O08582	GTPB1_MOUSE	Gtpbp1	GTP-binding protein 1	37225.3	36729.1	35423.1	38686.6	42593.7	34725.2	35660.8	29712.4	-0.0641844	-0.0611586	-0.242121
sp|Q9CQR5|ZMAT5_MOUSE	Q9CQR5	ZMAT5_MOUSE	Zmat5	Zinc finger matrin-type protein 5	35730.4	33732.1	36742.5	35455.5	32315.6	40307.8	29364.1	50064.4	-0.0642011	-0.00847661	0.129221
tr|Q3UIX4|Q3UIX4_MOUSE	Q3UIX4	Q3UIX4_MOUSE	Srsf11	Protein Srsf11	20351.7	18132.3	22694.2	20060.2	18825.7	21424.8	84624.7	115150	-0.0647502	0.0870626	2.3113
sp|Q9D819|IPYR_MOUSE	Q9D819	IPYR_MOUSE	Ppa1	Inorganic pyrophosphatase	36540.1	35051.3	36436.7	33228.9	39374.9	35510	38441.7	32442.7	-0.0648888	-0.104228	-0.0792076
sp|Q921E2|RAB31_MOUSE	Q921E2	RAB31_MOUSE	Rab31	Ras-related protein Rab-31	39095.9	34485.7	40298.9	38035.5	40500.3	36479.3	31820.3	28245.1	-0.0651295	0.0251695	-0.357942
sp|P16330|CN37_MOUSE	P16330	CN37_MOUSE	Cnp	2',3'-cyclic-nucleotide 3'-phosphodiesterase	35403.4	38274	36492.9	44919.4	33677.7	43402.1	31837.4	27715.8	-0.0651311	0.078893	-0.372174
sp|Q8R0F6|ILKAP_MOUSE	Q8R0F6	ILKAP_MOUSE	Ilkap	Integrin-linked kinase-associated serine/threonine phosphatase 2C	27478.7	38593.4	38838.2	36523.4	32315	36813.3	36132.1	48903.9	-0.0652323	0.124555	0.2988
sp|Q9R0L7|AKP8L_MOUSE	Q9R0L7	AKP8L_MOUSE	Akap8l	A-kinase anchor protein 8-like	32669	30438.7	29916.4	26840.3	33855.9	32178.1	49490.8	60971.4	-0.0653915	-0.218417	0.742271
sp|Q8R2R3|AAGAB_MOUSE	Q8R2R3	AAGAB_MOUSE	Aagab	Alpha- and gamma-adaptin-binding protein p34	32146.4	39499.2	35847.8	40373.2	36963	38009.2	29541.8	32890.4	-0.0654788	0.0238328	-0.264064
sp|O35841|API5_MOUSE	O35841	API5_MOUSE	Api5	Apoptosis inhibitor 5	29198.3	35307.3	29522.1	35391.3	29990.4	37515.1	44652.4	57866.8	-0.0655789	-0.056488	0.602819
sp|Q8BZR9|CQ085_MOUSE	Q8BZR9	CQ085_MOUSE	>sp|Q8BZR9|CQ085_MOUSE	Ncbp3	27381.9	30044.3	24090.9	33016.5	27943	32154.7	51451.4	78142.5	-0.0655991	-0.0736302	1.10862
sp|O09012|PEX5_MOUSE	O09012	PEX5_MOUSE	Pex5	Peroxisomal targeting signal 1 receptor	35747.9	36000.4	39875.6	38896.1	35775.1	39321	33186	33582.1	-0.0657935	0.0689391	-0.169581
sp|O08579|EMD_MOUSE	O08579	EMD_MOUSE	Emd	Emerin	39785.7	35245.4	33513.8	35363.2	44386.9	34145.8	36022.1	26507.1	-0.0658061	-0.189271	-0.328765
sp|Q6P4S8|INT1_MOUSE	Q6P4S8	INT1_MOUSE	Ints1	Integrator complex subunit 1	33300.8	34808.6	31458.5	33403.9	36168.9	35133	36532.5	49268.1	-0.0660877	-0.136559	0.267047
sp|O88685|PRS6A_MOUSE	O88685	PRS6A_MOUSE	Psmc3	26S protease regulatory subunit 6A	31241.6	43395.7	32528.3	41596	35125.1	43011.4	28944.9	32221.6	-0.0661015	-0.0760505	-0.353256
sp|A2RSY6|TRM1L_MOUSE	A2RSY6	TRM1L_MOUSE	Trmt1l	TRMT1-like protein	33617.7	36950.1	35151.3	29697.8	37727.1	36152.8	41338.9	44858.2	-0.0661728	-0.188095	0.222458
sp|P39054|DYN2_MOUSE	P39054	DYN2_MOUSE	Dnm2	Dynamin-2	37355.2	35897	42037.3	36520.7	38204.9	38498.2	32615.1	30402.7	-0.0664106	0.034475	-0.283524
sp|Q9D7N3|RT09_MOUSE	Q9D7N3	RT09_MOUSE	Mrps9	28S ribosomal protein S9, mitochondrial	34203.6	36926.3	32958.4	48213.5	34995.2	39489.8	30327	26331.6	-0.0664917	0.124032	-0.394655
sp|Q5SF07|IF2B2_MOUSE	Q5SF07	IF2B2_MOUSE	Igf2bp2	Insulin-like growth factor 2 mRNA-binding protein 2	42222.8	29947.2	40252.4	33706.6	42095.1	33479.8	38742	27916.9	-0.0665079	-0.0311833	-0.181111
sp|Q8BUR4|DOCK1_MOUSE	Q8BUR4	DOCK1_MOUSE	Dock1	Dedicator of cytokinesis protein 1	35812.2	35832.7	34464.6	38853.3	41440.5	33587.5	33233.6	32591.1	-0.0665661	-0.0332618	-0.1888
sp|O08808|DIAP1_MOUSE	O08808	DIAP1_MOUSE	Diaph1	Protein diaphanous homolog 1	34490.4	38576.8	45808.1	36014.2	36925.9	39593.3	27510.8	29917.7	-0.0665971	0.0966721	-0.414055
sp|Q80UZ2|SDA1_MOUSE	Q80UZ2	SDA1_MOUSE	Sdad1	Protein SDA1 homolog	31382.8	37693.8	36335.2	41762.2	33161.1	39181	35315.1	33682.3	-0.0666386	0.110438	-0.0682931
sp|Q64261|CDK6_MOUSE	Q64261	CDK6_MOUSE	Cdk6	Cyclin-dependent kinase 6	39757.7	35509.3	33261.4	35791.2	36203	42631.9	36975.6	32543	-0.0668159	-0.191139	-0.181434
sp|P14733|LMNB1_MOUSE	P14733	LMNB1_MOUSE	Lmnb1	Lamin-B1	44078.2	36387.3	29869.1	31998.8	48094.1	36197	31852.5	27880.6	-0.0670077	-0.446187	-0.496847
sp|P10637|TAU_MOUSE	P10637	TAU_MOUSE	Mapt	Microtubule-associated protein tau	28164.9	44742.7	26087.3	42575.1	34301.3	42077	29204.4	40372	-0.0670925	-0.153642	-0.134562
sp|Q9WUA2|SYFB_MOUSE	Q9WUA2	SYFB_MOUSE	Farsb	Phenylalanine--tRNA ligase beta subunit	37836.7	36431.6	35049.8	38259.7	36145.1	41662.7	33388.3	31728.1	-0.06717	-0.0859163	-0.256894
sp|Q91W50|CSDE1_MOUSE	Q91W50	CSDE1_MOUSE	Csde1	Cold shock domain-containing protein E1	39629.1	32346.4	39279.2	36749.6	37934.4	37477.2	37267.7	29530	-0.0672821	0.0117591	-0.174987
sp|B1AZI6|THOC2_MOUSE	B1AZI6	THOC2_MOUSE	Thoc2	THO complex subunit 2	29944	32407.9	27992.6	30733.1	32563.7	32770.8	47089.7	60765	-0.0674103	-0.153852	0.723174
sp|Q6NZB0|DNJC8_MOUSE	Q6NZB0	DNJC8_MOUSE	Dnajc8	DnaJ homolog subfamily C member 8	39797.9	28589.7	28102.7	36499.1	33945.9	37714.4	42512.6	43195.2	-0.0674389	-0.149601	0.258252
sp|Q80X50|UBP2L_MOUSE	Q80X50	UBP2L_MOUSE	Ubap2l	Ubiquitin-associated protein 2-like	38787.6	36174.5	34814.9	38053.7	39958.7	38591.4	30889.3	31953.6	-0.0674526	-0.108317	-0.321865
sp|Q8R0F5|RBMX2_MOUSE	Q8R0F5	RBMX2_MOUSE	Rbmx2	RNA-binding motif protein, X-linked 2	10980	12202.6	14286.8	11022.7	8397.38	15895.2	105133	157537	-0.0674666	0.059165	3.43466
sp|Q6PAM1|TXLNA_MOUSE	Q6PAM1	TXLNA_MOUSE	Txlna	Alpha-taxilin	35398.6	38777.6	35126.1	36371.9	37082.8	40655	36288.8	32763.9	-0.0676618	-0.120716	-0.170921
sp|P59759|MKL2_MOUSE	P59759	MKL2_MOUSE	Mkl2	MKL/myocardin-like protein 2	37162.8	36136.8	49363.7	36581.8	36403.6	40417.8	28801.5	30654.3	-0.067705	0.161913	-0.369693
sp|Q9EPK7|XPO7_MOUSE	Q9EPK7	XPO7_MOUSE	Xpo7	Exportin-7	32522.5	35168	33979.9	38845.7	34134.1	36816.7	37401.3	43517.3	-0.0678671	0.0376263	0.189653
sp|Q6DFW4|NOP58_MOUSE	Q6DFW4	NOP58_MOUSE	Nop58	Nucleolar protein 58	37511.8	33519.1	37325	34567.3	40864.8	33599	43664.2	31914	-0.0680925	-0.0507008	0.0214312
sp|O88491|NSD1_MOUSE	O88491	NSD1_MOUSE	Nsd1	Histone-lysine N-methyltransferase, H3 lysine-36 and H4 lysine-20 specific	30153.6	32714.5	37127.6	33462.7	29786.6	36123.1	21518.8	97585.3	-0.0681621	0.0989803	0.853659
sp|Q9Z315|SNUT1_MOUSE	Q9Z315	SNUT1_MOUSE	Sart1	U4/U6.U5 tri-snRNP-associated protein 1	30325	22840.1	29477.9	28312.7	26984.4	28756.9	67992.8	62521.4	-0.0682668	0.0520874	1.22739
sp|Q8BTH8|KC1G1_MOUSE	Q8BTH8	KC1G1_MOUSE	Csnk1g1	Casein kinase I isoform gamma-1	33261.1	33665.6	33855.9	43978.9	37943	32258.1	36997	32457.4	-0.0689128	0.148922	-0.0154271
sp|Q8CFI2|UB2R1_MOUSE	Q8CFI2	UB2R1_MOUSE	Cdc34	Ubiquitin-conjugating enzyme E2 R1	32090.7	33742.4	34565.1	38508.2	31998.8	37065.4	38360.6	47114	-0.0691232	0.0814069	0.307559
sp|Q8K2A7|INT10_MOUSE	Q8K2A7	INT10_MOUSE	Ints10	Integrator complex subunit 10	40345.2	29731.4	49670.3	30734.8	36472.4	37046.4	42578.9	38424.4	-0.0691811	0.129174	0.139867
sp|Q8BL66|EEA1_MOUSE	Q8BL66	EEA1_MOUSE	Eea1	Early endosome antigen 1	34994.9	38287	40977.2	40554.3	38108.7	38799.5	31159.8	33203.5	-0.0696812	0.0842189	-0.2569
sp|P58252|EF2_MOUSE	P58252	EF2_MOUSE	Eef2	Elongation factor 2	35032.6	39596.6	32249.9	37442.4	38648.3	39676.4	33156.1	31219.1	-0.0697289	-0.168469	-0.282965
sp|Q62425|NDUA4_MOUSE	Q62425	NDUA4_MOUSE	Ndufa4	NADH dehydrogenase [ubiquinone] 1 alpha subcomplex subunit 4	39761.8	32969.4	37989.2	35949.3	41940.9	34392	40858.7	27749.6	-0.0697316	-0.0459804	-0.153923
sp|Q3V1V3|ESF1_MOUSE	Q3V1V3	ESF1_MOUSE	Esf1	ESF1 homolog	35197.1	34663.9	30584.4	35860.5	36762.2	36562.4	41387.3	41592.6	-0.069809	-0.142137	0.178467
sp|Q8BU14|SEC62_MOUSE	Q8BU14	SEC62_MOUSE	Sec62	Translocation protein SEC62	34958.7	38360.9	34611.8	35275.9	30592.3	46372.9	29536.3	47696.5	-0.0700067	-0.139167	0.00500864
sp|Q9WV03|FA50A_MOUSE	Q9WV03	FA50A_MOUSE	Fam50a	Protein FAM50A	36108.3	33494.1	30630.1	33064.2	35376.8	37689.3	41773.5	48445.5	-0.0700674	-0.198039	0.304227
sp|P50396|GDIA_MOUSE	P50396	GDIA_MOUSE	Gdi1	Rab GDP dissociation inhibitor alpha	34240.2	38837.2	36807.1	33936	39295.2	37429.5	34176.7	36284.1	-0.0702682	-0.117102	-0.122871
sp|Q7TMY8|HUWE1_MOUSE	Q7TMY8	HUWE1_MOUSE	Huwe1	E3 ubiquitin-protein ligase HUWE1	36075.3	38135.3	32921.2	35628.3	38475	39443.8	33074.2	31997.6	-0.0703463	-0.184824	-0.259938
sp|Q9Z199|SPT4B_MOUSE	Q9Z199	SPT4B_MOUSE	Supt4h1b	Transcription elongation factor SPT4-B	36517.9	40769.5	27165.1	29976	41554.2	39613.3	35925.8	32816.6	-0.0706709	-0.506376	-0.239703
sp|Q505F5|LRC47_MOUSE	Q505F5	LRC47_MOUSE	Lrrc47	Leucine-rich repeat-containing protein 47	37722.9	36886.7	32093.9	35769.5	41225.9	37135.3	33649.7	32468.3	-0.0707774	-0.207507	-0.245096
sp|Q61187|TS101_MOUSE	Q61187	TS101_MOUSE	Tsg101	Tumor susceptibility gene 101 protein	41150.7	32520.2	39160.8	37193.5	40858.8	36519.1	40279	21986.3	-0.0708279	-0.0192122	-0.313492
sp|Q8R1A4|DOCK7_MOUSE	Q8R1A4	DOCK7_MOUSE	Dock7	Dedicator of cytokinesis protein 7	34761.6	38792.1	36333	39527.8	38958.1	38300.3	32777.1	31402.9	-0.0708944	-0.0263371	-0.26757
sp|Q8R4H2|ARHGC_MOUSE	Q8R4H2	ARHGC_MOUSE	Arhgef12	Rho guanine nucleotide exchange factor 12	37039.8	37208	41884.4	38954.4	40700.2	37299.9	29183.2	32491	-0.0711275	0.0515717	-0.33881
tr|Q99J77|Q99J77_MOUSE	Q99J77	Q99J77_MOUSE	Nans	N-acetylneuraminic acid synthase (Sialic acid synthase)	36355.7	37734.2	31480.7	35193	39587.3	38273.2	36555.2	33262.2	-0.0716157	-0.223774	-0.157304
sp|Q8JZQ2|AFG32_MOUSE	Q8JZQ2	AFG32_MOUSE	Afg3l2	AFG3-like protein 2	37432	33875.8	41622	37207.8	39442.1	35506.7	36915.8	30600.2	-0.0718475	0.0728355	-0.150677
sp|Q8BYC6|TAOK3_MOUSE	Q8BYC6	TAOK3_MOUSE	Taok3	Serine/threonine-protein kinase TAO3	34258.3	40641.9	26963	46963.6	33072.8	45662.7	24850.3	37070.8	-0.0720464	-0.0909226	-0.346584
sp|P62245|RS15A_MOUSE	P62245	RS15A_MOUSE	Rps15a	40S ribosomal protein S15a	36144.1	36111.7	39489.1	32400.1	42896.6	33065.3	35619.5	33944.6	-0.072163	-0.0795009	-0.126932
tr|Q91VU7|Q91VU7_MOUSE	Q91VU7	Q91VU7_MOUSE	Pus7	Protein Pus7	36014.5	30997	35278.6	37234.6	34796.3	35664.5	42400.1	38820.2	-0.072414	0.0414217	0.205018
sp|P00493|HPRT_MOUSE	P00493	HPRT_MOUSE	Hprt1	Hypoxanthine-guanine phosphoribosyltransferase	37365.5	34555.4	41027.2	37552.2	37920	37707.9	31459.9	34064	-0.0725088	0.055231	-0.206897
sp|Q8CI70|LRC20_MOUSE	Q8CI70	LRC20_MOUSE	Lrrc20	Leucine-rich repeat-containing protein 20	32706.2	39848.8	45099.4	35388.5	38385.1	37913.1	30050.6	30988.2	-0.0725733	0.0771245	-0.321924
sp|Q5U405|TMPSD_MOUSE	Q5U405	TMPSD_MOUSE	Tmprss13	Transmembrane protease serine 13	22800.7	41305.6	65286.6	28716.7	28937.9	38479.3	32660	31371.5	-0.0726505	0.479593	-0.0743357
sp|P61600|NAA20_MOUSE	P61600	NAA20_MOUSE	Naa20	N-alpha-acetyltransferase 20	37272.1	36471.7	35686.7	38792.7	39381.6	38180.7	31909.5	36298.2	-0.0728362	-0.0585147	-0.185422
sp|Q8BT14|CNOT4_MOUSE	Q8BT14	CNOT4_MOUSE	Cnot4	CCR4-NOT transcription complex subunit 4	42134	31243.5	36776.5	35541.6	40904	36278.1	33806.8	35656.2	-0.0729294	-0.0939085	-0.152023
sp|Q9CXU9|EIF1B_MOUSE	Q9CXU9	EIF1B_MOUSE	Eif1b	Eukaryotic translation initiation factor 1b	35319	34883.6	35834.1	36474	38171.7	35677.4	36993.8	37345	-0.0730565	-0.0304239	0.00953491
sp|Q6PIJ4|NFRKB_MOUSE	Q6PIJ4	NFRKB_MOUSE	Nfrkb	Nuclear factor related to kappa-B-binding protein	28132.7	40090.8	33067.8	37961.2	36602	35168.8	38557	46026.2	-0.0731286	-0.0149897	0.236973
sp|Q810A7|DDX42_MOUSE	Q810A7	DDX42_MOUSE	Ddx42	ATP-dependent RNA helicase DDX42	25825.6	22821.4	24366.5	25593.3	26872.8	24315.3	68288	89733	-0.0734602	-0.0350401	1.62624
sp|P32233|DRG1_MOUSE	P32233	DRG1_MOUSE	Drg1	Developmentally-regulated GTP-binding protein 1	34185.5	40545.1	36417.7	37693.5	37143.9	41494.4	35710.4	29317.1	-0.0735335	-0.0855398	-0.274183
sp|P99027|RLA2_MOUSE	P99027	RLA2_MOUSE	Rplp2	60S acidic ribosomal protein P2	40838	32683.7	32065.2	42159.9	36992.5	40386.8	31153.4	29724.8	-0.0737771	-0.0600403	-0.346021
sp|Q6ZWN5|RS9_MOUSE	Q6ZWN5	RS9_MOUSE	Rps9	40S ribosomal protein S9	34869.9	31502.6	41402.9	27193.4	37444.3	32411.1	46675.9	45835	-0.0737863	-0.0262405	0.405252
sp|O08585|CLCA_MOUSE	O08585	CLCA_MOUSE	Clta	Clathrin light chain A	41586.8	33296.3	38749.7	37560.1	40181.8	38638.5	29962	29216.7	-0.0739273	-0.0467002	-0.413491
tr|E9PVA8|E9PVA8_MOUSE	E9PVA8	E9PVA8_MOUSE	Gcn1l1	Protein Gcn1l1	37627.2	37147.2	34742.5	37634.8	38915.9	39792	32696.8	30511.6	-0.0739639	-0.120971	-0.316392
sp|Q9DB91|MED29_MOUSE	Q9DB91	MED29_MOUSE	Med29	Mediator of RNA polymerase II transcription subunit 29	35523.3	28207.6	41092.6	40671	36529.2	30555.9	39773.8	44575.6	-0.0739999	0.285468	0.330385
sp|Q9D0F6|RFC5_MOUSE	Q9D0F6	RFC5_MOUSE	Rfc5	Replication factor C subunit 5	31796.6	39356.4	42697.5	37864.6	35365.5	39552.4	30202.9	39519.5	-0.0743864	0.104791	-0.103687
sp|O35226|PSMD4_MOUSE	O35226	PSMD4_MOUSE	Psmd4	26S proteasome non-ATPase regulatory subunit 4	37270.8	37010.8	33863.9	37702.8	36506.6	41712	34069.8	31072.8	-0.0745047	-0.128222	-0.26391
sp|Q52KE7|CCNL1_MOUSE	Q52KE7	CCNL1_MOUSE	Ccnl1	Cyclin-L1	20727.2	17480.9	26431.1	23577	20751.8	19483.6	66840	121519	-0.0745814	0.313697	2.22695
sp|Q6GQT6|SCAP_MOUSE	Q6GQT6	SCAP_MOUSE	Scap	Sterol regulatory element-binding protein cleavage-activating protein	33750.7	36770.8	42098.9	41130.1	39489.3	34790.3	35681.5	21882.1	-0.0749027	0.164122	-0.36781
sp|Q9CXW3|CYBP_MOUSE	Q9CXW3	CYBP_MOUSE	Cacybp	Calcyclin-binding protein	34980.9	39889.7	32977.8	32680.6	37744.5	41117.1	33538.9	37581.2	-0.0749226	-0.264343	-0.149065
sp|Q04447|KCRB_MOUSE	Q04447	KCRB_MOUSE	Ckb	Creatine kinase B-type	33476.4	36002.6	30762.5	37070.6	35667.5	37532.3	35067.6	42732.3	-0.0752635	-0.109849	0.0879285
sp|Q9JJV2|PROF2_MOUSE	Q9JJV2	PROF2_MOUSE	Pfn2	Profilin-2	32496.5	42353.4	36076.6	38300.7	36568.3	42292.3	31696.2	31506.3	-0.0753038	-0.0844416	-0.319322
tr|Q91YT7|Q91YT7_MOUSE	Q91YT7	Q91YT7_MOUSE	Ythdf2	YTH domain-containing family protein 2	31642.7	45382	32716.8	31741.4	41719.5	39437.8	35860.6	33570.4	-0.0754004	-0.332356	-0.225141
sp|P60843|IF4A1_MOUSE	P60843	IF4A1_MOUSE	Eif4a1	Eukaryotic initiation factor 4A-I	34581.3	36237.1	35175.8	38046.7	36790.7	37833.7	36340.3	35571.4	-0.0755251	-0.0273633	-0.0534217
sp|P58463|FOXP2_MOUSE	P58463	FOXP2_MOUSE	Foxp2	Forkhead box protein P2	33015	38142.5	34201.4	43328.6	40229.4	34753	30744.9	33295.8	-0.0755368	0.0482035	-0.227564
sp|Q8CFD5|ERCC8_MOUSE	Q8CFD5	ERCC8_MOUSE	Ercc8	DNA excision repair protein ERCC-8	33700.5	33989.2	37420.9	38356.6	35039.8	36296.6	37701.9	40717.5	-0.0757023	0.0871303	0.136572
sp|Q8BL48|UNK_MOUSE	Q8BL48	UNK_MOUSE	Unk	RING finger protein unkempt homolog	32220.4	41724.8	44856	33134.9	41483.2	36452.1	32242	29220.7	-0.0758212	0.00102934	-0.342567
sp|Q9R0Q7|TEBP_MOUSE	Q9R0Q7	TEBP_MOUSE	Ptges3	Prostaglandin E synthase 3	34423.2	41349.5	37765.1	38337.7	38601	41272.7	28298	30703.7	-0.0760409	-0.0697711	-0.436964
sp|Q60931|VDAC3_MOUSE	Q60931	VDAC3_MOUSE	Vdac3	Voltage-dependent anion-selective channel protein 3	39733.1	37316.9	34577.3	36779.3	40836.7	40397.5	33559.8	27391	-0.0762916	-0.18704	-0.414444
sp|P18760|COF1_MOUSE	P18760	COF1_MOUSE	Cfl1	Cofilin-1	34731.1	37363.2	33698.5	39028.2	36631.2	39380.1	33875.4	34928.5	-0.0763286	-0.0637294	-0.143722
sp|Q99KQ4|NAMPT_MOUSE	Q99KQ4	NAMPT_MOUSE	Nampt	Nicotinamide phosphoribosyltransferase	38336.6	35353.2	34314.8	32582.1	41932	35764.5	35931.2	27795	-0.0763849	-0.21591	-0.285962
sp|Q8CDG3|VCIP1_MOUSE	Q8CDG3	VCIP1_MOUSE	Vcpip1	Deubiquitinating protein VCIP135	33004.8	38425.1	42265.6	34321.6	39250.5	36068.9	33736.2	37132.4	-0.0764917	0.024083	-0.0878732
sp|Q9ER00|STX12_MOUSE	Q9ER00	STX12_MOUSE	Stx12	Syntaxin-12	37676.4	34550.2	38365	37901.2	39326.4	36833.1	37651.8	30948.8	-0.0764937	0.00202209	-0.150801
tr|F8VPK0|F8VPK0_MOUSE	F8VPK0	F8VPK0_MOUSE	Ttc37	Protein Ttc37	37154.8	35363.1	43243.1	33542.2	39784.1	36686.6	37008.1	32131.1	-0.0765715	0.005922	-0.145404
sp|Q6A065|CE170_MOUSE	Q6A065	CE170_MOUSE	Cep170	Centrosomal protein of 170 kDa	34307.5	39691.3	31511.2	37953.1	39580.4	38492.1	34440.9	31074.3	-0.0773116	-0.168542	-0.252983
sp|Q93092|TALDO_MOUSE	Q93092	TALDO_MOUSE	Taldo1	Transaldolase	38490.7	33630.1	31000.5	33256.6	41449.7	34661.6	39579.8	34098.8	-0.0776941	-0.244253	-0.0468642
sp|Q8K3W0|BRE_MOUSE	Q8K3W0	BRE_MOUSE	Bre	BRCA1-A complex subunit BRE	37365.2	32176.2	39552.8	36214.3	41354	32036.7	40147.6	38916.9	-0.0777241	0.0459736	0.107432
sp|Q9CR20|IR3IP_MOUSE	Q9CR20	IR3IP_MOUSE	Ier3ip1	Immediate early response 3-interacting protein 1	36047	38931.2	35623.9	37861	42161.5	36968.8	33476.3	27008.2	-0.077759	-0.106783	-0.387665
sp|P61027|RAB10_MOUSE	P61027	RAB10_MOUSE	Rab10	Ras-related protein Rab-10	36391	36097.1	40460	37472.7	37467.6	39043.5	31368.6	35071	-0.0779248	0.0265602	-0.203627
sp|Q3U319|BRE1B_MOUSE	Q3U319	BRE1B_MOUSE	Rnf40	E3 ubiquitin-protein ligase BRE1B	32899.6	36198.9	34023.7	37350.3	36532.6	36411.3	36873.6	38942.7	-0.0781334	-0.0313867	0.055722
sp|Q4PZA2|ECE1_MOUSE	Q4PZA2	ECE1_MOUSE	Ece1	Endothelin-converting enzyme 1	28420.6	39800.8	29901.6	36810.7	34261.4	37757.8	30224.6	46260.6	-0.0781581	-0.110429	0.0867984
sp|Q99KJ8|DCTN2_MOUSE	Q99KJ8	DCTN2_MOUSE	Dctn2	Dynactin subunit 2	36036.9	37242.7	38261.3	33923.1	43384.2	33988.2	35912.3	31175.8	-0.0784075	-0.100131	-0.205763
sp|Q8CIG8|ANM5_MOUSE	Q8CIG8	ANM5_MOUSE	Prmt5	Protein arginine N-methyltransferase 5	36240.6	35789.8	37721.3	42115.5	36256.7	39816.3	30896.4	27822.8	-0.0787789	0.0696694	-0.373551
sp|Q8VD04|GRAP1_MOUSE	Q8VD04	GRAP1_MOUSE	Gripap1	GRIP1-associated protein 1	32214.1	41963.9	35593.6	49938.7	32767.7	45576	27406	20141.3	-0.0788245	0.126651	-0.720454
sp|Q9Z2U0|PSA7_MOUSE	Q9Z2U0	PSA7_MOUSE	Psma7	Proteasome subunit alpha type-7	34049	40602.8	36005.9	35150.6	39693.5	39176.5	30468.1	33311.9	-0.0793004	-0.148481	-0.306372
sp|Q9JJ28|FLII_MOUSE	Q9JJ28	FLII_MOUSE	Flii	Protein flightless-1 homolog	37524.9	37212.8	35657.5	38393.9	37593.8	41369.5	34103.3	28340.2	-0.0793464	-0.0926564	-0.338632
sp|Q8CGF7|TCRG1_MOUSE	Q8CGF7	TCRG1_MOUSE	Tcerg1	Transcription elongation regulator 1	28143.4	24541.7	25577.1	22632.9	28077.1	27588.3	64951.8	88757.3	-0.0793848	-0.207449	1.46535
sp|P59470|RPC2_MOUSE	P59470	RPC2_MOUSE	Polr3b	DNA-directed RNA polymerase III subunit RPC2	33158	37978.8	34239.7	33819.2	39999.5	35166.3	34125	41912.2	-0.0794816	-0.143294	0.0166267
sp|Q9JLM8|DCLK1_MOUSE	Q9JLM8	DCLK1_MOUSE	Dclk1	Serine/threonine-protein kinase DCLK1	37294.2	35755.2	37514.1	40663.5	32772.6	44420.5	37197.5	31585.5	-0.079597	0.0182843	-0.166419
sp|P24547|IMDH2_MOUSE	P24547	IMDH2_MOUSE	Impdh2	Inosine-5'-monophosphate dehydrogenase 2	37867.9	35147.7	37522.8	38522.7	38936.1	38221.7	34153.4	31641.6	-0.0796067	-0.0209496	-0.229834
sp|Q8R332|NUPL1_MOUSE	Q8R332	NUPL1_MOUSE	Nupl1	Nucleoporin p58/p45	36645.6	37304.3	35564.1	31602.8	43936	34214.6	39559.6	24807.6	-0.079709	-0.218507	-0.279931
sp|Q8K4B0|MTA1_MOUSE	Q8K4B0	MTA1_MOUSE	Mta1	Metastasis-associated protein MTA1	40207.8	32923.8	36024.6	34092	40473.4	36813.5	40445.7	28527.6	-0.0797294	-0.140468	-0.164186
tr|Q8VHM5|Q8VHM5_MOUSE	Q8VHM5	Q8VHM5_MOUSE	Hnrnpr	Heterogeneous nuclear ribonucleoprotein R	33522.7	28793.4	30615.6	30975	32623.5	33235	52421.6	52496.9	-0.0797672	-0.0966586	0.671827
sp|Q8BMQ2|TF3C4_MOUSE	Q8BMQ2	TF3C4_MOUSE	Gtf3c4	General transcription factor 3C polypeptide 4	37945.2	34513.3	38750.7	32928.4	41392.6	35190.7	39353.6	31355.5	-0.0798739	-0.0954756	-0.115132
sp|P62320|SMD3_MOUSE	P62320	SMD3_MOUSE	Snrpd3	Small nuclear ribonucleoprotein Sm D3	15306.7	15980.7	16856	12071.1	16653.1	16417.8	90985.3	148347	-0.079983	-0.193138	2.85538
sp|Q6PDI5|ECM29_MOUSE	Q6PDI5	ECM29_MOUSE	Ecm29	Proteasome-associated protein ECM29 homolog	34313.9	38796.1	35454.8	39275.2	39073.7	38229.1	33494.3	30936.4	-0.0804506	-0.0488317	-0.262772
sp|Q9DB30|PHKG2_MOUSE	Q9DB30	PHKG2_MOUSE	Phkg2	Phosphorylase b kinase gamma catalytic chain, liver/testis isoform	38843.2	30244.2	46750.6	39197.9	37911.7	35159.4	33487.7	29692.4	-0.0808784	0.234171	-0.209832
sp|Q3ULJ0|GPD1L_MOUSE	Q3ULJ0	GPD1L_MOUSE	Gpd1l	Glycerol-3-phosphate dehydrogenase 1-like protein	35959.2	32644.3	39308.9	43190.4	36302.6	36265.2	31524.6	40103.3	-0.0810469	0.185053	-0.0188066
sp|Q922H4|GMPPA_MOUSE	Q922H4	GMPPA_MOUSE	Gmppa	Mannose-1-phosphate guanyltransferase alpha	38371	30869.4	31895.1	35195.2	40517.1	32740.8	45307.8	33354.3	-0.0813687	-0.126878	0.102686
sp|Q99LX5|MMTA2_MOUSE	Q99LX5	MMTA2_MOUSE	Mmtag2	Multiple myeloma tumor-associated protein 2 homolog	29454.2	39805.8	43009.5	37443.7	36352	36929.1	36382.9	35464.9	-0.0814203	0.134706	-0.0284979
sp|Q8CGA0|PPM1F_MOUSE	Q8CGA0	PPM1F_MOUSE	Ppm1f	Protein phosphatase 1F	36214.2	41545.6	40184.4	35617.2	40434.5	41843.3	36801.9	22279.2	-0.0814776	-0.118273	-0.477808
sp|Q8R1Q8|DC1L1_MOUSE	Q8R1Q8	DC1L1_MOUSE	Dync1li1	Cytoplasmic dynein 1 light intermediate chain 1	36894.4	37216.9	36432.2	40986.4	35940.9	42480	31383.3	28657.2	-0.0815459	-0.0185582	-0.385302
sp|Q9WU00|NRF1_MOUSE	Q9WU00	NRF1_MOUSE	Nrf1	Nuclear respiratory factor 1	35386.3	36125.3	44302.9	33570.9	37429.9	38241.7	36405.9	39013	-0.0815766	0.0413865	-0.00482786
tr|E9Q3Y4|E9Q3Y4_MOUSE	E9Q3Y4	E9Q3Y4_MOUSE	Lrba	Lipopolysaccharide-responsive and beige-like anchor protein	34659.8	35471.2	36184.7	38867.6	35895.2	38318.8	32006.5	40357.5	-0.0816387	0.0162029	-0.0364198
tr|E9Q7E2|E9Q7E2_MOUSE	E9Q7E2	E9Q7E2_MOUSE	Arid2	Protein Arid2	38113.8	31632.3	36350.6	41230.2	31346.5	42461	36356.5	30343.6	-0.0816535	0.0719335	-0.146078
sp|P46735|MYO1B_MOUSE	P46735	MYO1B_MOUSE	Myo1b	Unconventional myosin-Ib	38357.7	36599	37999.3	35974.7	40273.4	39057.2	33276.1	28345.3	-0.0818185	-0.10086	-0.364447
sp|Q9D020|5NT3A_MOUSE	Q9D020	5NT3A_MOUSE	Nt5c3a	Cytosolic 5'-nucleotidase 3A	33365.4	32182.2	45412.6	38565.4	34710	34681.2	30999.1	42460.4	-0.0822104	0.27526	0.0821953
sp|P14869|RLA0_MOUSE	P14869	RLA0_MOUSE	Rplp0	60S acidic ribosomal protein P0	38832.8	34335.8	41566.5	35133.3	41367	36096	35848.4	28273.6	-0.0822826	-0.0142849	-0.27269
sp|Q9CWU9|NUP37_MOUSE	Q9CWU9	NUP37_MOUSE	Nup37	Nucleoporin Nup37	25584.7	46978.6	34287.5	41846	34910.2	41916.6	28938.6	31778.7	-0.0823675	-0.0130776	-0.339502
sp|Q9Z2A0|PDPK1_MOUSE	Q9Z2A0	PDPK1_MOUSE	Pdpk1	3-phosphoinositide-dependent protein kinase 1	39063.9	35719.4	37344.5	39943.6	38896.4	40292.6	35445.4	30066.4	-0.0825864	-0.035056	-0.273547
sp|Q62446|FKBP3_MOUSE	Q62446	FKBP3_MOUSE	Fkbp3	Peptidyl-prolyl cis-trans isomerase FKBP3	35127.3	37923.5	38470.4	35564.6	38898.2	38456.7	36192.8	29090.8	-0.0825924	-0.0632853	-0.244772
sp|P41241|CSK_MOUSE	P41241	CSK_MOUSE	Csk	Tyrosine-protein kinase CSK	33745.4	40794.6	27605	40433.8	38445.7	40488.5	32064.2	28896.9	-0.0826348	-0.214292	-0.372759
tr|A2AT37|A2AT37_MOUSE	A2AT37	A2AT37_MOUSE	Upf2	Protein Upf2	27306.8	42406.4	38069.9	39827.8	35933.6	37896.8	35258.2	34988.3	-0.0827846	0.0773648	-0.0717895
sp|P13864|DNMT1_MOUSE	P13864	DNMT1_MOUSE	Dnmt1	DNA (cytosine-5)-methyltransferase 1	32748.2	28907.7	33484.3	28604.5	36899.4	28400	50528.2	63313.3	-0.0828311	-0.0727357	0.801885
sp|Q9R117|TYK2_MOUSE	Q9R117	TYK2_MOUSE	Tyk2	Non-receptor tyrosine-protein kinase TYK2	37170.1	41383.5	37060.9	24685	46611.1	36586	32076.7	44892	-0.0828574	-0.43019	-0.112261
tr|E9PYG6|E9PYG6_MOUSE	E9PYG6	E9PYG6_MOUSE	Rasa1	Protein Rasa1	37198.4	34899.8	44936.7	32256.7	33188.3	43185.2	38010.7	31831.8	-0.0831066	0.0154054	-0.128965
sp|Q6PGG6|GNL3L_MOUSE	Q6PGG6	GNL3L_MOUSE	Gnl3l	Guanine nucleotide-binding protein-like 3-like protein	38426.6	37789.6	37705.5	38547.4	40043.1	40699.2	29609.8	24253.4	-0.0832259	-0.0825319	-0.584024
sp|Q8R317|UBQL1_MOUSE	Q8R317	UBQL1_MOUSE	Ubqln1	Ubiquilin-1	34542.8	36033.8	37802.8	40421.4	35324.9	39445.6	35052.9	31774.6	-0.083279	0.0651456	-0.162026
sp|Q7TMM9|TBB2A_MOUSE	Q7TMM9	TBB2A_MOUSE	Tubb2a	Tubulin beta-2A chain	31580.8	41265.4	28955.9	44369.9	35389.1	41787.4	31621.6	30287	-0.0833063	-0.0738382	-0.318021
sp|Q9DB40|MED27_MOUSE	Q9DB40	MED27_MOUSE	Med27	Mediator of RNA polymerase II transcription subunit 27	36391.4	41196.6	27577.5	37665.2	35483.6	46735.3	24469.9	45023.3	-0.0836357	-0.333653	-0.242597
sp|O70310|NMT1_MOUSE	O70310	NMT1_MOUSE	Nmt1	Glycylpeptide N-tetradecanoyltransferase 1	36821.3	37748.3	36173.8	39292.2	37740.6	41280.4	32725.2	26939.8	-0.0836484	-0.0664078	-0.40535
sp|Q9CWU4|CA052_MOUSE	Q9CWU4	CA052_MOUSE	>sp|Q9CWU4|CA052_MOUSE	n/a	38359.7	32085.7	40654.1	32357.5	34753.1	39940.4	39119.9	40101	-0.0844778	-0.0328592	0.0848963
sp|Q08122|TLE3_MOUSE	Q08122	TLE3_MOUSE	Tle3	Transducin-like enhancer protein 3	30033.8	39167.7	31787.5	43272.1	31911.7	41464.9	31598.1	43151.4	-0.0845185	0.0327166	0.0267427
sp|P30999|CTND1_MOUSE	P30999	CTND1_MOUSE	Ctnnd1	Catenin delta-1	36428.6	32491.1	38823.1	33163.6	39442.6	33640.5	38015.5	40476.6	-0.084622	-0.0218078	0.103008
sp|Q6NZM9|HDAC4_MOUSE	Q6NZM9	HDAC4_MOUSE	Hdac4	Histone deacetylase 4	39855.4	32703	42114.2	36039.8	41863.6	35092.3	33334.6	28223.2	-0.0848894	0.0222866	-0.32209
sp|Q62172|RBP1_MOUSE	Q62172	RBP1_MOUSE	Ralbp1	RalA-binding protein 1	32430.8	37820.7	39143.9	38795.9	36682.8	37834.6	36671.2	36217.7	-0.0850485	0.0647821	-0.0318768
sp|Q9DD02|HIKES_MOUSE	Q9DD02	HIKES_MOUSE	L7rn6	Protein Hikeshi	30668.5	35991.8	54719.7	36440.3	39576.1	31132.7	34274.2	38757.3	-0.0850604	0.366511	0.0466295
sp|Q9JHP7|KDEL1_MOUSE	Q9JHP7	KDEL1_MOUSE	Kdelc1	KDEL motif-containing protein 1	32305.3	36138.4	42818.6	40713.1	33987.2	38613.5	33027.4	38216.2	-0.0850648	0.20234	-0.0272227
sp|P49813|TMOD1_MOUSE	P49813	TMOD1_MOUSE	Tmod1	Tropomodulin-1	39689.5	32683.4	42994.9	32339.2	42335.7	34444.9	34171.2	28969.2	-0.0852921	-0.0274376	-0.282177
sp|P62874|GBB1_MOUSE	P62874	GBB1_MOUSE	Gnb1	Guanine nucleotide-binding protein G(I)/G(S)/G(T) subunit beta-1	30282.3	44117.2	28693.8	43461.7	34451	44482.3	26521.8	33327.3	-0.0853396	-0.129523	-0.399302
sp|Q6P5B0|RRP12_MOUSE	Q6P5B0	RRP12_MOUSE	Rrp12	RRP12-like protein	37688.9	35028.4	33386.6	37648.9	38656.9	38497.5	35506	37574.8	-0.0854507	-0.119209	-0.0782572
sp|Q80X82|SYMPK_MOUSE	Q80X82	SYMPK_MOUSE	Sympk	Symplekin	26733.1	29258.6	25951.2	31854.3	28593.5	30818.6	60444.5	64240.5	-0.0855435	-0.0395508	1.06946
sp|Q6P542|ABCF1_MOUSE	Q6P542	ABCF1_MOUSE	Abcf1	ATP-binding cassette sub-family F member 1	35317.4	36975.7	34530	35634.3	39776.1	36942.9	37597.7	32578.3	-0.0857276	-0.128849	-0.128608
sp|P15532|NDKA_MOUSE	P15532	NDKA_MOUSE	Nme1	Nucleoside diphosphate kinase A	38482.3	33118.4	37526.5	38894.4	37900.4	38093.3	34641	30190.1	-0.0859057	0.00808643	-0.229195
sp|P60229|EIF3E_MOUSE	P60229	EIF3E_MOUSE	Eif3e	Eukaryotic translation initiation factor 3 subunit E	37795.7	34527.3	39327.8	36807.3	40242.8	36521.6	35079.6	30191.6	-0.0859837	-0.0118767	-0.23399
tr|Q9D3J3|Q9D3J3_MOUSE	Q9D3J3	Q9D3J3_MOUSE	Bcl2l12	BCL2-like 12 (Proline rich), isoform CRA_b	36924.3	30959.5	32208.7	43319.3	31552.8	40500.4	38288.7	36289	-0.085996	0.0679493	0.0496832
sp|Q5SVR0|TBC9B_MOUSE	Q5SVR0	TBC9B_MOUSE	Tbc1d9b	TBC1 domain family member 9B	36261.8	35793.7	33363.3	35844.9	39031.7	37452.3	37755	32971.3	-0.0860511	-0.144215	-0.112911
sp|Q9CPU0|LGUL_MOUSE	Q9CPU0	LGUL_MOUSE	Glo1	Lactoylglutathione lyase	40197.8	33705.2	37344.7	42820.3	35992	42455.9	32642.5	22106.1	-0.086102	0.0312366	-0.518913
sp|Q9WTX5|SKP1_MOUSE	Q9WTX5	SKP1_MOUSE	Skp1	S-phase kinase-associated protein 1	38280.1	31325.6	40097.1	39826.3	36882.3	37013.4	36793.2	32261.4	-0.0862846	0.113127	-0.0977508
sp|P28700|RXRA_MOUSE	P28700	RXRA_MOUSE	Rxra	Retinoic acid receptor RXR-alpha	41859.9	28681.7	33249.5	33662.3	32347.9	42554.2	40382.4	38170.4	-0.0865308	-0.162745	0.0686559
sp|Q6NZJ6|IF4G1_MOUSE	Q6NZJ6	IF4G1_MOUSE	Eif4g1	Eukaryotic translation initiation factor 4 gamma 1	34249.2	38864.8	34554.7	39468.4	38135.6	39500.2	32868	27659.8	-0.0865732	-0.0687461	-0.359125
sp|P47740|AL3A2_MOUSE	P47740	AL3A2_MOUSE	Aldh3a2	Fatty aldehyde dehydrogenase	37509.1	35125.5	39361	34690	42485.3	34684.6	34326.8	33499.8	-0.0873817	-0.0595188	-0.186188
sp|P11103|PARP1_MOUSE	P11103	PARP1_MOUSE	Parp1	Poly [ADP-ribose] polymerase 1	35952.4	34731	33141	34766.4	37982.1	37119.7	37522.8	42125.6	-0.087475	-0.145278	0.0847999
sp|Q9CXY6|ILF2_MOUSE	Q9CXY6	ILF2_MOUSE	Ilf2	Interleukin enhancer-binding factor 2	34798	30272.7	30970.9	35270.2	33552.8	35585.4	46869.1	49665.9	-0.0874776	-0.0617576	0.481569
sp|Q9Z108|STAU1_MOUSE	Q9Z108	STAU1_MOUSE	Stau1	Double-stranded RNA-binding protein Staufen homolog 1	36049.1	35706.1	33955.5	39187.2	34890.2	41352.3	33717.7	33580	-0.0875135	-0.0598827	-0.18004
sp|Q9JKY5|HIP1R_MOUSE	Q9JKY5	HIP1R_MOUSE	Hip1r	Huntingtin-interacting protein 1-related protein	35027.1	38329.6	28377.6	40056.3	35389.4	42570	32846.5	37375.4	-0.087795	-0.188012	-0.150801
sp|Q8VEM8|MPCP_MOUSE	Q8VEM8	MPCP_MOUSE	Slc25a3	Phosphate carrier protein, mitochondrial	30923.6	35476.8	32569.4	42755.6	37768.4	32799.3	36470.5	40986	-0.0878161	0.0941198	0.13438
sp|Q8R429|AT2A1_MOUSE	Q8R429	AT2A1_MOUSE	Atp2a1	Sarcoplasmic/endoplasmic reticulum calcium ATPase 1	38083.7	37359.6	37567.8	38757.1	38805.3	41375.2	31316.9	28895.3	-0.0878582	-0.0710977	-0.413196
sp|Q8BU30|SYIC_MOUSE	Q8BU30	SYIC_MOUSE	Iars	Isoleucine--tRNA ligase, cytoplasmic	39404.6	35564.9	35923.2	33254.6	43266.4	36415.3	35618	27320.8	-0.0879444	-0.203939	-0.3403
sp|Q8BGR9|UBCP1_MOUSE	Q8BGR9	UBCP1_MOUSE	Ublcp1	Ubiquitin-like domain-containing CTD phosphatase 1	31632.1	36228.4	35520.8	37789.3	37129.8	35019.1	38946.8	39412.2	-0.088405	0.0230334	0.119122
sp|Q8VEE1|LMCD1_MOUSE	Q8VEE1	LMCD1_MOUSE	Lmcd1	LIM and cysteine-rich domains protein 1	38623.2	34503.1	28538.5	42865.1	40983.3	36764.7	30478.7	26179.1	-0.0884136	-0.122808	-0.45653
sp|Q9QXS6|DREB_MOUSE	Q9QXS6	DREB_MOUSE	Dbn1	Drebrin	34248	38714	33087.4	41988.3	34625.3	42950.5	34085.5	30890.9	-0.0884612	-0.0472607	-0.255691
sp|Q99PL5|RRBP1_MOUSE	Q99PL5	RRBP1_MOUSE	Rrbp1	Ribosome-binding protein 1	39896.1	34900.5	31449.7	38681.3	34812.1	44714.9	31273.5	33511.6	-0.0884718	-0.181394	-0.295783
sp|Q9D0K0|TBCD7_MOUSE	Q9D0K0	TBCD7_MOUSE	Tbc1d7	TBC1 domain family member 7	38764.3	34966.8	34453.9	39686	39027.7	39366.9	32320.9	31639.7	-0.0884808	-0.0805053	-0.293571
sp|Q9QY76|VAPB_MOUSE	Q9QY76	VAPB_MOUSE	Vapb	Vesicle-associated membrane protein-associated protein B	34009.3	39433.9	32049.6	40840.4	36791.4	41300	32174.1	30992.7	-0.0885356	-0.0994455	-0.305998
sp|Q9DBY8|NVL_MOUSE	Q9DBY8	NVL_MOUSE	Nvl	Nuclear valosin-containing protein-like	37999.1	25984.2	40582.7	39496.3	35745.3	32295.9	42343.3	39262.2	-0.0887133	0.235013	0.262256
sp|P24369|PPIB_MOUSE	P24369	PPIB_MOUSE	Ppib	Peptidyl-prolyl cis-trans isomerase B	36082	36104	32520.6	30431.1	40735.2	36029.8	36319.3	36645.2	-0.0887286	-0.286201	-0.0732518
sp|P62717|RL18A_MOUSE	P62717	RL18A_MOUSE	Rpl18a	60S ribosomal protein L18a	34257.2	42363.4	28716.5	36010.2	41781.9	39699.9	33163.5	27870.4	-0.0887445	-0.332116	-0.416868
sp|Q8C7R4|UBA6_MOUSE	Q8C7R4	UBA6_MOUSE	Uba6	Ubiquitin-like modifier-activating enzyme 6	33728.6	35212.7	39896.8	34525.4	36013.6	37310.3	39339.9	33175.9	-0.088915	0.0214484	-0.0159882
sp|A2A5R2|BIG2_MOUSE	A2A5R2	BIG2_MOUSE	Arfgef2	Brefeldin A-inhibited guanine nucleotide-exchange protein 2	33542.8	38925	33811.6	33570.5	39551.4	37538.6	34802.8	33811.4	-0.0892053	-0.194179	-0.168038
sp|Q9D0T1|NH2L1_MOUSE	Q9D0T1	NH2L1_MOUSE	Nhp2l1	NHP2-like protein 1	38527.8	29730.4	36213.8	34321	37887.3	34727.7	43545	38513.3	-0.0892637	-0.0419319	0.176383
sp|Q9WU78|PDC6I_MOUSE	Q9WU78	PDC6I_MOUSE	Pdcd6ip	Programmed cell death 6-interacting protein	37315	37875.7	38208.4	36729.6	39357	40637.9	31746.5	25792.9	-0.0893528	-0.0942088	-0.475355
sp|Q9CQ92|FIS1_MOUSE	Q9CQ92	FIS1_MOUSE	Fis1	Mitochondrial fission 1 protein	37268.8	33632.9	35688.3	34896.3	48874.1	26562.1	36175	37272.1	-0.0894372	-0.0959039	-0.0385524
tr|G3X9B1|G3X9B1_MOUSE	G3X9B1	G3X9B1_MOUSE	Heatr1	HEAT repeat containing 1	33910.9	43206.8	30059.5	40158.3	37057.6	45016.3	29742.7	31700.5	-0.0898605	-0.225087	-0.417669
[truncated: 879 more rows]
