# Supplementary material for: iDRiP for the systematic discovery of proteins bound directly to noncoding RNA
Source: Springer Nature journal article supplement (doi:10.1038/s41596-021-00555-9), 2021-06-09
Supplement: MOESM6 [file 41596_2021_555_MOESM6_ESM19.xlsx]

## Sheet: U1-iDRiP statistics by fitting
Reference	Entry	Uniprot_Gene_name	GeneName	Protein_description	Abundance Ratio	log2(Abundance Ratio)	p value	FDR
sp|Q9CQI7|RU2B_MOUSE	Q9CQI7	RU2B_MOUSE	Snrpb2	U2 small nuclear ribonucleoprotein B''	48.6537	5.60448	8.43089e-17	2.00486e-13
sp|Q62082|MYL10_MOUSE	Q62082	MYL10_MOUSE	Myl10	Myosin regulatory light chain 10	43.2005	5.43298	7.03466e-16	8.36421e-13
sp|Q62189|SNRPA_MOUSE	Q62189	SNRPA_MOUSE	Snrpa	U1 small nuclear ribonucleoprotein A	32.2751	5.01235	9.78165e-14	7.3005e-11
sp|Q91Z83|MYH7_MOUSE	Q91Z83	MYH7_MOUSE	Myh7	Myosin-7	31.8261	4.99214	1.22801e-13	7.3005e-11
sp|Q62376|RU17_MOUSE	Q62376	RU17_MOUSE	Snrnp70	U1 small nuclear ribonucleoprotein 70 kDa	31.2025	4.96359	1.69091e-13	8.04197e-11
sp|P62309|RUXG_MOUSE	P62309	RUXG_MOUSE	Snrpg	Small nuclear ribonucleoprotein G	29.8125	4.89784	3.50855e-13	1.39056e-10
sp|P62305|RUXE_MOUSE	P62305	RUXE_MOUSE	Snrpe	Small nuclear ribonucleoprotein E	29.1237	4.86412	5.08336e-13	1.72689e-10
sp|Q8K4Z5|SF3A1_MOUSE	Q8K4Z5	SF3A1_MOUSE	Sf3a1	Splicing factor 3A subunit 1	26.5905	4.73284	2.10331e-12	6.2521e-10
sp|Q62241|RU1C_MOUSE	Q62241	RU1C_MOUSE	Snrpc	U1 small nuclear ribonucleoprotein C	22.6076	4.49874	2.41332e-11	6.37653e-09
sp|P62320|SMD3_MOUSE	P62320	SMD3_MOUSE	Snrpd3	Small nuclear ribonucleoprotein Sm D3	22.3683	4.48338	2.82048e-11	6.70709e-09
sp|P27048|RSMB_MOUSE	P27048	RSMB_MOUSE	Snrpb	Small nuclear ribonucleoprotein-associated protein B	18.1615	4.18281	5.38667e-10	1.1645e-07
sp|P13541|MYH3_MOUSE	P13541	MYH3_MOUSE	Myh3	Myosin-3	18.0381	4.17297	5.91325e-10	1.17181e-07
sp|Q5SX39|MYH4_MOUSE	Q5SX39	MYH4_MOUSE	Myh4	Myosin-4	16.1975	4.0177	2.50608e-09	4.5842e-07
sp|Q9QZ47|TNNT3_MOUSE	Q9QZ47	TNNT3_MOUSE	Tnnt3	Troponin T, fast skeletal muscle	14.4337	3.85137	1.11118e-08	1.88741e-06
sp|P62315|SMD1_MOUSE	P62315	SMD1_MOUSE	Snrpd1	Small nuclear ribonucleoprotein Sm D1	11.2914	3.49715	2.17195e-07	3.44326e-05
sp|P13542|MYH8_MOUSE	P13542	MYH8_MOUSE	Myh8	Myosin-8	11.1387	3.47751	2.54089e-07	3.7764e-05
sp|O09161|CASQ2_MOUSE	O09161	CASQ2_MOUSE	Casq2	Calsequestrin-2	10.6793	3.41675	4.10717e-07	5.74521e-05
sp|P05977|MYL1_MOUSE	P05977	MYL1_MOUSE	Myl1	Myosin light chain 1/3, skeletal muscle isoform	10.1265	3.34007	7.44342e-07	9.83359e-05
sp|P56959|FUS_MOUSE	P56959	FUS_MOUSE	Fus	RNA-binding protein FUS	7.68286	2.94164	1.33315e-05	0.00166855
sp|Q8BX17|GEMI5_MOUSE	Q8BX17	GEMI5_MOUSE	Gemin5	Gem-associated protein 5	7.10525	2.82888	2.83485e-05	0.00337064
sp|Q9R1C7|PR40A_MOUSE	Q9R1C7	PR40A_MOUSE	Prpf40a	Pre-mRNA-processing factor 40 homolog A	6.52459	2.70589	6.25677e-05	0.00708505
sp|Q80W14|PR40B_MOUSE	Q80W14	PR40B_MOUSE	Prpf40b	Pre-mRNA-processing factor 40 homolog B	6.1544	2.62162	0.000105617	0.0114163
sp|Q8BHR2|ENOX1_MOUSE	Q8BHR2	ENOX1_MOUSE	Enox1	Ecto-NOX disulfide-thiol exchanger 1	6.04891	2.59667	0.000122959	0.0127129
sp|Q8CH02|SUGP1_MOUSE	Q8CH02	SUGP1_MOUSE	Sugp1	SURP and G-patch domain-containing protein 1	5.73899	2.5208	0.000193659	0.0191884
sp|Q80SY5|PR38B_MOUSE	Q80SY5	PR38B_MOUSE	Prpf38b	Pre-mRNA-splicing factor 38B	5.59667	2.48457	0.00023951	0.0227822
sp|Q80W00|PP1RA_MOUSE	Q80W00	PP1RA_MOUSE	Ppp1r10	Serine/threonine-protein phosphatase 1 regulatory subunit 10	5.53684	2.46906	0.000262087	0.0239709
sp|Q5SUF2|LC7L3_MOUSE	Q5SUF2	LC7L3_MOUSE	Luc7l3	Luc7-like protein 3	5.41182	2.43611	0.000316836	0.0279051
sp|Q5SU73|COIL_MOUSE	Q5SU73	COIL_MOUSE	Coil	Coilin	5.35669	2.42134	0.000344701	0.029275
sp|Q3U0V1|FUBP2_MOUSE	Q3U0V1	FUBP2_MOUSE	Khsrp	Far upstream element-binding protein 2	5.28904	2.40301	0.00038247	0.0313625
sp|Q9D2E2|TOE1_MOUSE	Q9D2E2	TOE1_MOUSE	Toe1	Target of EGR1 protein 1	4.77357	2.25507	0.000861773	0.066723
sp|B2RY56|RBM25_MOUSE	B2RY56	RBM25_MOUSE	Rbm25	RNA-binding protein 25	4.76781	2.25333	0.000869813	0.066723
sp|P58771|TPM1_MOUSE	P58771	TPM1_MOUSE	Tpm1	Tropomyosin alpha-1 chain	4.68556	2.22822	0.000993607	0.0738374
sp|P62307|RUXF_MOUSE	P62307	RUXF_MOUSE	Snrpf	Small nuclear ribonucleoprotein F	4.37984	2.13088	0.00164333	0.117461
tr|Q6P6L6|Q6P6L6_MOUSE	Q6P6L6	Q6P6L6_MOUSE	Gemin4	Gem (Nuclear organelle) associated protein 4	4.36682	2.12658	0.00167943	0.117461
sp|Q99KG3|RBM10_MOUSE	Q99KG3	RBM10_MOUSE	Rbm10	RNA-binding protein 10	4.34093	2.118	0.00175372	0.119153
sp|A2A6A1|GPTC8_MOUSE	A2A6A1	GPTC8_MOUSE	Gpatch8	G patch domain-containing protein 8	4.26701	2.09322	0.0019855	0.131154
sp|P97801|SMN_MOUSE	P97801	SMN_MOUSE	Smn1	Survival motor neuron protein	4.22746	2.07979	0.00212254	0.136416
sp|Q8R0F5|RBMX2_MOUSE	Q8R0F5	RBMX2_MOUSE	Rbmx2	RNA-binding motif protein, X-linked 2	4.1908	2.06723	0.00225844	0.141331
sp|Q9JJY4|DDX20_MOUSE	Q9JJY4	DDX20_MOUSE	Ddx20	Probable ATP-dependent RNA helicase DDX20	4.10696	2.03807	0.00260489	0.157053
sp|Q8CGZ0|CHERP_MOUSE	Q8CGZ0	CHERP_MOUSE	Cherp	Calcium homeostasis endoplasmic reticulum protein	4.09873	2.03518	0.00264177	0.157053
sp|Q8CH25|SLTM_MOUSE	Q8CH25	SLTM_MOUSE	Sltm	SAFB-like transcription modulator	3.97893	1.99238	0.00324577	0.188254
tr|B2RT41|B2RT41_MOUSE	B2RT41	B2RT41_MOUSE	Zfc3h1	Protein Zfc3h1	3.92661	1.97328	0.0035536	0.201201
sp|Q91WJ8|FUBP1_MOUSE	Q91WJ8	FUBP1_MOUSE	Fubp1	Far upstream element-binding protein 1	3.81466	1.93155	0.00431981	0.238896
sp|O35326|SRSF5_MOUSE	O35326	SRSF5_MOUSE	Srsf5	Serine/arginine-rich splicing factor 5	3.78166	1.91902	0.00457734	0.242034
tr|Q3TIX6|Q3TIX6_MOUSE	Q3TIX6	Q3TIX6_MOUSE	Fubp3	Protein Fubp3	3.78131	1.91889	0.00458013	0.242034
sp|Q9CQF3|CPSF5_MOUSE	Q9CQF3	CPSF5_MOUSE	Nudt21	Cleavage and polyadenylation specificity factor subunit 5	3.74668	1.90561	0.00486805	0.251657
sp|Q80YR5|SAFB2_MOUSE	Q80YR5	SAFB2_MOUSE	Safb2	Scaffold attachment factor B2	3.66936	1.87553	0.00558133	0.282392
sp|Q6ZPZ3|ZC3H4_MOUSE	Q6ZPZ3	ZC3H4_MOUSE	Zc3h4	Zinc finger CCCH domain-containing protein 4	3.61468	1.85387	0.00615143	0.304752
sp|Q921F2|TADBP_MOUSE	Q921F2	TADBP_MOUSE	Tardbp	TAR DNA-binding protein 43	3.59396	1.84557	0.00638312	0.309777
sp|E9Q5F9|SETD2_MOUSE	E9Q5F9	SETD2_MOUSE	Setd2	Histone-lysine N-methyltransferase SETD2	3.54878	1.82732	0.00692042	0.329135
sp|Q6P8I4|PCNP_MOUSE	Q6P8I4	PCNP_MOUSE	Pcnp	PEST proteolytic signal-containing nuclear protein	3.44916	1.78625	0.00827939	0.386047
sp|P70318|TIAR_MOUSE	P70318	TIAR_MOUSE	Tial1	Nucleolysin TIAR	3.3933	1.76269	0.00916095	0.402464
sp|Q8BL97|SRSF7_MOUSE	Q8BL97	SRSF7_MOUSE	Srsf7	Serine/arginine-rich splicing factor 7	3.38963	1.76113	0.00922219	0.402464
sp|A2A4P0|DHX8_MOUSE	A2A4P0	DHX8_MOUSE	Dhx8	ATP-dependent RNA helicase DHX8	3.38522	1.75925	0.00929639	0.402464
sp|Q61545|EWS_MOUSE	Q61545	EWS_MOUSE	Ewsr1	RNA-binding protein EWS	3.3731	1.75407	0.00950341	0.402464
sp|Q6PDM2|SRSF1_MOUSE	Q6PDM2	SRSF1_MOUSE	Srsf1	Serine/arginine-rich splicing factor 1	3.36104	1.74891	0.00971412	0.402464
sp|Q61464|ZN638_MOUSE	Q61464	ZN638_MOUSE	Znf638	Zinc finger protein 638	3.35307	1.74548	0.00985603	0.402464
sp|Q91YK2|RRP1B_MOUSE	Q91YK2	RRP1B_MOUSE	Rrp1b	Ribosomal RNA processing protein 1 homolog B	3.34766	1.74315	0.00995369	0.402464
sp|Q6NXI6|RPRD2_MOUSE	Q6NXI6	RPRD2_MOUSE	Rprd2	Regulation of nuclear pre-mRNA domain-containing protein 2	3.33939	1.73958	0.0101049	0.402464
sp|O88466|ZN106_MOUSE	O88466	ZN106_MOUSE	Znf106	Zinc finger protein 106	3.33214	1.73645	0.0102393	0.402464
sp|Q9DBR0|AKAP8_MOUSE	Q9DBR0	AKAP8_MOUSE	Akap8	A-kinase anchor protein 8	3.32763	1.7345	0.0103239	0.402464
sp|P32067|LA_MOUSE	P32067	LA_MOUSE	Ssb	Lupus La protein homolog	3.29941	1.72221	0.0108702	0.416924
sp|Q3TYA6|MPP8_MOUSE	Q3TYA6	MPP8_MOUSE	Mphosph8	M-phase phosphoprotein 8	3.27743	1.71256	0.0113163	0.420473
sp|Q9CYI4|LUC7L_MOUSE	Q9CYI4	LUC7L_MOUSE	Luc7l	Putative RNA-binding protein Luc7-like 1	3.2419	1.69684	0.0120785	0.441887
sp|Q501J6|DDX17_MOUSE	Q501J6	DDX17_MOUSE	Ddx17	Probable ATP-dependent RNA helicase DDX17	3.19145	1.67421	0.0132536	0.477531
tr|Q3ULB0|Q3ULB0_MOUSE	Q3ULB0	Q3ULB0_MOUSE	Rbm6	Protein Rbm6	3.16621	1.66276	0.0138856	0.492835
sp|D3YXK2|SAFB1_MOUSE	D3YXK2	SAFB1_MOUSE	Safb	Scaffold attachment factor B1	3.14099	1.65122	0.0145484	0.508431
sp|P97868|RBBP6_MOUSE	P97868	RBBP6_MOUSE	Rbbp6	E3 ubiquitin-protein ligase RBBP6	3.13346	1.64776	0.0147526	0.508431
sp|Q9QX47|SON_MOUSE	Q9QX47	SON_MOUSE	Son	Protein SON	3.11488	1.63918	0.0152693	0.514882
sp|Q8C9B9|DIDO1_MOUSE	Q8C9B9	DIDO1_MOUSE	Dido1	Death-inducer obliterator 1	3.11124	1.63749	0.0153729	0.514882
sp|Q924W5|SMC6_MOUSE	Q924W5	SMC6_MOUSE	Smc6	Structural maintenance of chromosomes protein 6	3.08727	1.62633	0.016072	0.521136
sp|Q3USH5|SFSWA_MOUSE	Q3USH5	SFSWA_MOUSE	Sfswap	Splicing factor, suppressor of white-apricot homolog	3.08405	1.62483	0.0161684	0.521136
tr|B2RQG2|B2RQG2_MOUSE	B2RQG2	B2RQG2_MOUSE	Phf3	PHD finger protein 3	3.08244	1.62407	0.016217	0.521136
sp|Q9CR57|RL14_MOUSE	Q9CR57	RL14_MOUSE	Rpl14	60S ribosomal protein L14	3.03469	1.60155	0.0177246	0.547746
sp|Q8JZX4|SPF45_MOUSE	Q8JZX4	SPF45_MOUSE	Rbm17	Splicing factor 45	3.03434	1.60138	0.0177361	0.547746
sp|Q99J83|ATG5_MOUSE	Q99J83	ATG5_MOUSE	Atg5	Autophagy protein 5	2.96911	1.57003	0.0200352	0.603085
sp|Q8JZS6|N42L2_MOUSE	Q8JZS6	N42L2_MOUSE	N4bp2l2	NEDD4-binding protein 2-like 2	2.9607	1.56594	0.0203536	0.605009
sp|Q9CY66|GAR1_MOUSE	Q9CY66	GAR1_MOUSE	Gar1	H/ACA ribonucleoprotein complex subunit 1	2.92761	1.54972	0.0216568	0.627073
sp|Q8BTI8|SRRM2_MOUSE	Q8BTI8	SRRM2_MOUSE	Srrm2	Serine/arginine repetitive matrix protein 2	2.91965	1.54579	0.0219831	0.627073
sp|Q8VIJ6|SFPQ_MOUSE	Q8VIJ6	SFPQ_MOUSE	Sfpq	Splicing factor, proline- and glutamine-rich	2.85832	1.51517	0.0246725	0.627073
sp|Q9JII5|DAZP1_MOUSE	Q9JII5	DAZP1_MOUSE	Dazap1	DAZ-associated protein 1	2.85341	1.51269	0.0249022	0.627073
sp|O88291|ZN326_MOUSE	O88291	ZN326_MOUSE	Znf326	DBIRD complex subunit ZNF326	2.84827	1.51009	0.0251447	0.627073
sp|Q9R0U0|SRS10_MOUSE	Q9R0U0	SRS10_MOUSE	Srsf10	Serine/arginine-rich splicing factor 10	2.8278	1.49968	0.0261354	0.627073
sp|Q569Z6|TR150_MOUSE	Q569Z6	TR150_MOUSE	Thrap3	Thyroid hormone receptor-associated protein 3	2.81619	1.49375	0.0267152	0.627073
sp|Q6NV83|SR140_MOUSE	Q6NV83	SR140_MOUSE	U2surp	U2 snRNP-associated SURP motif-containing protein	2.81292	1.49207	0.026881	0.627073
sp|P26369|U2AF2_MOUSE	P26369	U2AF2_MOUSE	U2af2	Splicing factor U2AF 65 kDa subunit	2.71399	1.44042	0.032425	0.627073
sp|P97457|MLRS_MOUSE	P97457	MLRS_MOUSE	Mylpf	Myosin regulatory light chain 2, skeletal muscle isoform	2.7087	1.4376	0.0327525	0.627073
sp|Q64012|RALY_MOUSE	Q64012	RALY_MOUSE	Raly	RNA-binding protein Raly	2.69828	1.43204	0.0334078	0.627073
sp|Q8K4P0|WDR33_MOUSE	Q8K4P0	WDR33_MOUSE	Wdr33	pre-mRNA 3' end processing protein WDR33	2.68856	1.42683	0.0340313	0.627073
sp|B1AZI6|THOC2_MOUSE	B1AZI6	THOC2_MOUSE	Thoc2	THO complex subunit 2	2.67555	1.41984	0.034884	0.627073
tr|E9PZM7|E9PZM7_MOUSE	E9PZM7	E9PZM7_MOUSE	Scaf11	Protein Scaf11	2.66368	1.41342	0.0356814	0.627073
tr|Q8CCB2|Q8CCB2_MOUSE	Q8CCB2	Q8CCB2_MOUSE	Zfp207	BUB3-interacting and GLEBS motif-containing protein ZNF207	2.66186	1.41243	0.0358056	0.627073
tr|E9PZM4|E9PZM4_MOUSE	E9PZM4	E9PZM4_MOUSE	Chd2	Chromodomain-helicase-DNA-binding protein 2	2.65235	1.40727	0.03646	0.627073
sp|P22518|CLK1_MOUSE	P22518	CLK1_MOUSE	Clk1	Dual specificity protein kinase CLK1	2.6493	1.40561	0.0366726	0.627073
tr|Q0VBL3|Q0VBL3_MOUSE	Q0VBL3	Q0VBL3_MOUSE	Rbm15	Protein Rbm15	2.64857	1.40521	0.036724	0.627073
sp|Q8BI72|CARF_MOUSE	Q8BI72	CARF_MOUSE	Cdkn2aip	CDKN2A-interacting protein	2.64313	1.40225	0.0371063	0.627073
sp|Q9D1P2|KAT8_MOUSE	Q9D1P2	KAT8_MOUSE	Kat8	Histone acetyltransferase KAT8	2.63366	1.39707	0.0377821	0.627073
sp|Q60749|KHDR1_MOUSE	Q60749	KHDR1_MOUSE	Khdrbs1	KH domain-containing, RNA-binding, signal transduction-associated protein 1	2.63249	1.39643	0.0378669	0.627073
tr|E9Q5K9|E9Q5K9_MOUSE	E9Q5K9	E9Q5K9_MOUSE	Ythdc1	YTH domain-containing protein 1	2.62949	1.39479	0.0380837	0.627073
sp|Q8CH18|CCAR1_MOUSE	Q8CH18	CCAR1_MOUSE	Ccar1	Cell division cycle and apoptosis regulator protein 1	2.623	1.39122	0.0385582	0.627073
tr|G5E924|G5E924_MOUSE	G5E924	G5E924_MOUSE	Hnrnpl	Heterogeneous nuclear ribonucleoprotein L (Fragment)	2.59049	1.37323	0.0410269	0.627073
sp|Q99K48|NONO_MOUSE	Q99K48	NONO_MOUSE	Nono	Non-POU domain-containing octamer-binding protein	2.58547	1.37042	0.0414228	0.627073
sp|Q8C5L3|CNOT2_MOUSE	Q8C5L3	CNOT2_MOUSE	Cnot2	CCR4-NOT transcription complex subunit 2	2.55539	1.35354	0.0438736	0.627073
sp|Q8C854|MYEF2_MOUSE	Q8C854	MYEF2_MOUSE	Myef2	Myelin expression factor 2	2.55532	1.3535	0.0438799	0.627073
sp|P21550|ENOB_MOUSE	P21550	ENOB_MOUSE	Eno3	Beta-enolase	2.5529	1.35214	0.0440834	0.627073
sp|Q69ZR9|F208A_MOUSE	Q69ZR9	F208A_MOUSE	Fam208a	Protein FAM208A	2.53979	1.34471	0.045203	0.627073
sp|P10922|H10_MOUSE	P10922	H10_MOUSE	H1f0	Histone H1.0	2.52851	1.33829	0.0461889	0.627073
sp|P28659|CELF1_MOUSE	P28659	CELF1_MOUSE	Celf1	CUGBP Elav-like family member 1	2.52496	1.33626	0.0465042	0.627073
tr|E9Q796|E9Q796_MOUSE	E9Q796	E9Q796_MOUSE	Scml2	Protein Scml2	2.52449	1.33599	0.0465456	0.627073
tr|A2AJ71|A2AJ71_MOUSE	A2AJ71	A2AJ71_MOUSE	Fubp3	Protein Fubp3 (Fragment)	2.49273	1.31773	0.0494639	0.627073
tr|Q8BGJ5|Q8BGJ5_MOUSE	Q8BGJ5	Q8BGJ5_MOUSE	Ptbp1	MCG13402, isoform CRA_a	2.48991	1.31609	0.0497323	0.627073
sp|Q14AX6|CDK12_MOUSE	Q14AX6	CDK12_MOUSE	Cdk12	Cyclin-dependent kinase 12	2.47981	1.31023	0.0507042	0.627073
sp|Q9Z2X1|HNRPF_MOUSE	Q9Z2X1	HNRPF_MOUSE	Hnrnpf	Heterogeneous nuclear ribonucleoprotein F	2.4663	1.30235	0.0520342	0.627073
sp|Q99JX7|NXF1_MOUSE	Q99JX7	NXF1_MOUSE	Nxf1	Nuclear RNA export factor 1	2.46526	1.30174	0.0521376	0.627073
sp|Q9D0E1|HNRPM_MOUSE	Q9D0E1	HNRPM_MOUSE	Hnrnpm	Heterogeneous nuclear ribonucleoprotein M	2.46144	1.2995	0.0525208	0.627073
sp|P15864|H12_MOUSE	P15864	H12_MOUSE	Hist1h1c	Histone H1.2	2.45815	1.29758	0.0528528	0.627073
sp|Q91VM5|RMXL1_MOUSE	Q91VM5	RMXL1_MOUSE	Rbmxl1	RNA binding motif protein, X-linked-like-1	2.44796	1.29158	0.0538962	0.627073
sp|Q91ZA3|PCCA_MOUSE	Q91ZA3	PCCA_MOUSE	Pcca	Propionyl-CoA carboxylase alpha chain, mitochondrial	2.41742	1.27347	0.0571475	0.627073
tr|B7ZNL9|B7ZNL9_MOUSE	B7ZNL9	B7ZNL9_MOUSE	Tatdn2	Protein Tatdn2	2.3878	1.25568	0.0604888	0.627073
sp|Q6PFR5|TRA2A_MOUSE	Q6PFR5	TRA2A_MOUSE	Tra2a	Transformer-2 protein homolog alpha	2.38213	1.25225	0.0611509	0.627073
sp|Q6A068|CDC5L_MOUSE	Q6A068	CDC5L_MOUSE	Cdc5l	Cell division cycle 5-like protein	2.3519	1.23383	0.0648038	0.627073
sp|P40201|CHD1_MOUSE	P40201	CHD1_MOUSE	Chd1	Chromodomain-helicase-DNA-binding protein 1	2.35111	1.23334	0.0649022	0.627073
sp|A2AJT4|PNISR_MOUSE	A2AJT4	PNISR_MOUSE	Pnisr	Arginine/serine-rich protein PNISR	2.34974	1.2325	0.0650734	0.627073
sp|Q9Z2Q2|KNOP1_MOUSE	Q9Z2Q2	KNOP1_MOUSE	Knop1	Lysine-rich nucleolar protein 1	2.33983	1.2264	0.0663228	0.627073
sp|O35286|DHX15_MOUSE	O35286	DHX15_MOUSE	Dhx15	Putative pre-mRNA-splicing factor ATP-dependent RNA helicase DHX15	2.33824	1.22542	0.0665251	0.627073
sp|Q6NVF9|CPSF6_MOUSE	Q6NVF9	CPSF6_MOUSE	Cpsf6	Cleavage and polyadenylation specificity factor subunit 6	2.33354	1.22252	0.0671281	0.627073
sp|Q9Z0H1|WDR46_MOUSE	Q9Z0H1	WDR46_MOUSE	Wdr46	WD repeat-containing protein 46	2.33346	1.22247	0.0671384	0.627073
sp|Q3URR7|ZSC10_MOUSE	Q3URR7	ZSC10_MOUSE	Zscan10	Zinc finger and SCAN domain-containing protein 10	2.32675	1.21832	0.0680086	0.627073
sp|Q7TNC4|LC7L2_MOUSE	Q7TNC4	LC7L2_MOUSE	Luc7l2	Putative RNA-binding protein Luc7-like 2	2.29827	1.20055	0.071829	0.627073
sp|Q8VE97|SRSF4_MOUSE	Q8VE97	SRSF4_MOUSE	Srsf4	Serine/arginine-rich splicing factor 4	2.29682	1.19964	0.0720298	0.627073
sp|P70372|ELAV1_MOUSE	P70372	ELAV1_MOUSE	Elavl1	ELAV-like protein 1	2.27561	1.18626	0.0750212	0.627073
sp|Q9D824|FIP1_MOUSE	Q9D824	FIP1_MOUSE	Fip1l1	Pre-mRNA 3'-end-processing factor FIP1	2.2395	1.16318	0.0804016	0.627073
tr|E9PVX6|E9PVX6_MOUSE	E9PVX6	E9PVX6_MOUSE	Mki67	Protein Mki67	2.23281	1.15886	0.0814406	0.627073
sp|Q571H0|NPA1P_MOUSE	Q571H0	NPA1P_MOUSE	Urb1	Nucleolar pre-ribosomal-associated protein 1	2.22687	1.15502	0.0823722	0.627073
sp|Q07139|ECT2_MOUSE	Q07139	ECT2_MOUSE	Ect2	Protein ECT2	2.22217	1.15197	0.0831186	0.627073
sp|Q9D0B0|SRSF9_MOUSE	Q9D0B0	SRSF9_MOUSE	Srsf9	Serine/arginine-rich splicing factor 9	2.22075	1.15104	0.0833456	0.627073
sp|Q8K327|CHAP1_MOUSE	Q8K327	CHAP1_MOUSE	Champ1	Chromosome alignment-maintaining phosphoprotein 1	2.20875	1.14323	0.0852835	0.627073
sp|Q3UHX0|NOL8_MOUSE	Q3UHX0	NOL8_MOUSE	Nol8	Nucleolar protein 8	2.20093	1.13811	0.086572	0.627073
sp|O35492|CLK3_MOUSE	O35492	CLK3_MOUSE	Clk3	Dual specificity protein kinase CLK3	2.19747	1.13584	0.0871471	0.627073
tr|Q3U109|Q3U109_MOUSE	Q3U109	Q3U109_MOUSE	Brpf1	Protein Brpf1	2.19391	1.13351	0.0877431	0.627073
sp|Q9Z204-2|HNRPC_MOUSE	Q9Z204-2	HNRPC_MOUSE	Hnrnpc	Isoform C1 of Heterogeneous nuclear ribonucleoproteins C1/C2	2.18396	1.12694	0.0894318	0.627073
sp|Q91YU8|SSF1_MOUSE	Q91YU8	SSF1_MOUSE	Ppan	Suppressor of SWI4 1 homolog	2.1746	1.12075	0.0910487	0.627073
sp|Q91XI1|DUS3L_MOUSE	Q91XI1	DUS3L_MOUSE	Dus3l	tRNA-dihydrouridine(47) synthase [NAD(P)(+)]-like	2.15826	1.10987	0.0939405	0.627073
sp|O55201|SPT5H_MOUSE	O55201	SPT5H_MOUSE	Supt5h	Transcription elongation factor SPT5	2.15255	1.10604	0.0949721	0.627073
sp|P70279|SURF6_MOUSE	P70279	SURF6_MOUSE	Surf6	Surfeit locus protein 6	2.15207	1.10573	0.0950585	0.627073
tr|G3UY19|G3UY19_MOUSE	G3UY19	G3UY19_MOUSE	Prc1	Protein regulator of cytokinesis 1	2.14326	1.09981	0.0966724	0.627073
sp|Q61188|EZH2_MOUSE	Q61188	EZH2_MOUSE	Ezh2	Histone-lysine N-methyltransferase EZH2	2.13468	1.09402	0.0982721	0.627073
sp|Q810A7|DDX42_MOUSE	Q810A7	DDX42_MOUSE	Ddx42	ATP-dependent RNA helicase DDX42	2.13236	1.09245	0.0987091	0.627073
sp|Q8CFQ3|AQR_MOUSE	Q8CFQ3	AQR_MOUSE	Aqr	Intron-binding protein aquarius	2.13038	1.09111	0.0990832	0.627073
sp|Q8R2M2|TDIF2_MOUSE	Q8R2M2	TDIF2_MOUSE	Dnttip2	Deoxynucleotidyltransferase terminal-interacting protein 2	2.12436	1.08703	0.100229	0.627073
sp|Q6NZN0|RBM26_MOUSE	Q6NZN0	RBM26_MOUSE	Rbm26	RNA-binding protein 26	2.11756	1.08241	0.101538	0.627073
tr|D3Z0M9|D3Z0M9_MOUSE	D3Z0M9	D3Z0M9_MOUSE	Ddx23	MCG18410, isoform CRA_a	2.11745	1.08233	0.10156	0.627073
tr|A2A7B5|A2A7B5_MOUSE	A2A7B5	A2A7B5_MOUSE	Prdm2	Protein Prdm2	2.11598	1.08133	0.101844	0.627073
sp|Q60899|ELAV2_MOUSE	Q60899	ELAV2_MOUSE	Elavl2	ELAV-like protein 2	2.11557	1.08105	0.101925	0.627073
sp|Q08288|LYAR_MOUSE	Q08288	LYAR_MOUSE	Lyar	Cell growth-regulating nucleolar protein	2.11496	1.08063	0.102045	0.627073
sp|Q60668|HNRPD_MOUSE	Q60668	HNRPD_MOUSE	Hnrnpd	Heterogeneous nuclear ribonucleoprotein D0	2.10798	1.07586	0.103412	0.627073
sp|Q8BU03|PWP2_MOUSE	Q8BU03	PWP2_MOUSE	Pwp2	Periodic tryptophan protein 2 homolog	2.10456	1.07352	0.10409	0.627073
sp|Q8BHN5|RBM45_MOUSE	Q8BHN5	RBM45_MOUSE	Rbm45	RNA-binding protein 45	2.10268	1.07223	0.104462	0.627073
tr|Q8BVY0|Q8BVY0_MOUSE	Q8BVY0	Q8BVY0_MOUSE	Rsl1d1	Protein Rsl1d1	2.09548	1.06728	0.105907	0.627073
sp|Q3UCQ1|FOXK2_MOUSE	Q3UCQ1	FOXK2_MOUSE	Foxk2	Forkhead box protein K2	2.09202	1.0649	0.106609	0.627073
sp|Q6P4T2|U520_MOUSE	Q6P4T2	U520_MOUSE	Snrnp200	U5 small nuclear ribonucleoprotein 200 kDa helicase	2.0861	1.06081	0.107818	0.627073
tr|E9Q9Y4|E9Q9Y4_MOUSE	E9Q9Y4	E9Q9Y4_MOUSE	Tet1	Methylcytosine dioxygenase TET1	2.08551	1.0604	0.10794	0.627073
sp|Q9D168|INT12_MOUSE	Q9D168	INT12_MOUSE	Ints12	Integrator complex subunit 12	2.0842	1.05949	0.10821	0.627073
tr|A2ART2|A2ART2_MOUSE	A2ART2	A2ART2_MOUSE	Gm4245	Protein Gm14431	2.08062	1.05701	0.10895	0.627073
tr|B1AWL2|B1AWL2_MOUSE	B1AWL2	B1AWL2_MOUSE	Zfp462	Protein Zfp462	2.08016	1.05669	0.109046	0.627073
sp|Q9CSN1|SNW1_MOUSE	Q9CSN1	SNW1_MOUSE	Snw1	SNW domain-containing protein 1	2.07484	1.053	0.110156	0.627073
sp|Q9EPU4|CPSF1_MOUSE	Q9EPU4	CPSF1_MOUSE	Cpsf1	Cleavage and polyadenylation specificity factor subunit 1	2.06998	1.04961	0.111182	0.627073
sp|Q5SFM8|RBM27_MOUSE	Q5SFM8	RBM27_MOUSE	Rbm27	RNA-binding protein 27	2.06746	1.04786	0.111716	0.627073
sp|Q8K363|DDX18_MOUSE	Q8K363	DDX18_MOUSE	Ddx18	ATP-dependent RNA helicase DDX18	2.06462	1.04587	0.112322	0.627073
sp|Q9JIH2|NUP50_MOUSE	Q9JIH2	NUP50_MOUSE	Nup50	Nuclear pore complex protein Nup50	2.05965	1.0424	0.113389	0.627073
sp|Q8C7V3|UTP15_MOUSE	Q8C7V3	UTP15_MOUSE	Utp15	U3 small nucleolar RNA-associated protein 15 homolog	2.04759	1.03392	0.116019	0.627073
sp|Q5DW34|EHMT1_MOUSE	Q5DW34	EHMT1_MOUSE	Ehmt1	Histone-lysine N-methyltransferase EHMT1	2.04664	1.03326	0.116228	0.627073
sp|A2APB8|TPX2_MOUSE	A2APB8	TPX2_MOUSE	Tpx2	Targeting protein for Xklp2	2.0456	1.03252	0.116459	0.627073
sp|Q6P3Y5|Z280C_MOUSE	Q6P3Y5	Z280C_MOUSE	Znf280c	Zinc finger protein 280C	2.0415	1.02963	0.117368	0.627073
sp|P97452|BOP1_MOUSE	P97452	BOP1_MOUSE	Bop1	Ribosome biogenesis protein BOP1	2.03743	1.02675	0.118281	0.627073
sp|Q5HZJ0|RNC_MOUSE	Q5HZJ0	RNC_MOUSE	Drosha	Ribonuclease 3	2.02544	1.01824	0.121002	0.627073
sp|Q6PAC3|DCA13_MOUSE	Q6PAC3	DCA13_MOUSE	Dcaf13	DDB1- and CUL4-associated factor 13	2.02205	1.01582	0.121783	0.627073
sp|Q9R0L7|AKP8L_MOUSE	Q9R0L7	AKP8L_MOUSE	Akap8l	A-kinase anchor protein 8-like	2.02109	1.01513	0.122007	0.627073
sp|P43275|H11_MOUSE	P43275	H11_MOUSE	Hist1h1a	Histone H1.1	2.01682	1.01208	0.122999	0.627073
sp|Q91W39|NCOA5_MOUSE	Q91W39	NCOA5_MOUSE	Ncoa5	Nuclear receptor coactivator 5	2.00872	1.00628	0.124902	0.627073
sp|Q02395|MTF2_MOUSE	Q02395	MTF2_MOUSE	Mtf2	Metal-response element-binding transcription factor 2	1.99784	0.998439	0.127502	0.627073
sp|Q9CZJ1|UTP11_MOUSE	Q9CZJ1	UTP11_MOUSE	Utp11l	Probable U3 small nucleolar RNA-associated protein 11	1.98	0.985497	0.131878	0.627073
tr|F7BJB9|F7BJB9_MOUSE	F7BJB9	F7BJB9_MOUSE	Morc3	Protein Morc3	1.96992	0.978137	0.134412	0.627073
sp|A2AR02|PPIG_MOUSE	A2AR02	PPIG_MOUSE	Ppig	Peptidyl-prolyl cis-trans isomerase G	1.96429	0.974011	0.135846	0.627073
sp|O88491|NSD1_MOUSE	O88491	NSD1_MOUSE	Nsd1	Histone-lysine N-methyltransferase, H3 lysine-36 and H4 lysine-20 specific	1.9631	0.973133	0.136153	0.627073
sp|Q8BTT6|DIEXF_MOUSE	Q8BTT6	DIEXF_MOUSE	Diexf	Digestive organ expansion factor homolog	1.94951	0.963109	0.139686	0.627073
sp|P61979|HNRPK_MOUSE	P61979	HNRPK_MOUSE	Hnrnpk	Heterogeneous nuclear ribonucleoprotein K	1.94851	0.962371	0.139949	0.627073
sp|P35550|FBRL_MOUSE	P35550	FBRL_MOUSE	Fbl	rRNA 2'-O-methyltransferase fibrillarin	1.93361	0.951294	0.143929	0.627073
sp|Q8VIG1|REST_MOUSE	Q8VIG1	REST_MOUSE	Rest	RE1-silencing transcription factor	1.92414	0.944217	0.14651	0.627073
sp|A6H619|PHRF1_MOUSE	A6H619	PHRF1_MOUSE	Phrf1	PHD and RING finger domain-containing protein 1	1.92383	0.943979	0.146597	0.627073
sp|Q8VI84|NOC3L_MOUSE	Q8VI84	NOC3L_MOUSE	Noc3l	Nucleolar complex protein 3 homolog	1.92032	0.94135	0.147565	0.627073
sp|Q6DVA0|LEMD2_MOUSE	Q6DVA0	LEMD2_MOUSE	Lemd2	LEM domain-containing protein 2	1.9155	0.937722	0.148906	0.627073
sp|Q9D0D4|DIM1_MOUSE	Q9D0D4	DIM1_MOUSE	Dimt1	Probable dimethyladenosine transferase	1.91179	0.934924	0.149946	0.627073
tr|E9Q4F8|E9Q4F8_MOUSE	E9Q4F8	E9Q4F8_MOUSE	Ankrd11	Protein Ankrd11	1.90348	0.928639	0.152299	0.627073
sp|Q8CGF7|TCRG1_MOUSE	Q8CGF7	TCRG1_MOUSE	Tcerg1	Transcription elongation regulator 1	1.90083	0.92663	0.153056	0.627073
sp|Q69ZK6|JHD2C_MOUSE	Q69ZK6	JHD2C_MOUSE	Jmjd1c	Probable JmjC domain-containing histone demethylation protein 2C	1.89606	0.923002	0.15443	0.627073
sp|Q6NS46|RRP5_MOUSE	Q6NS46	RRP5_MOUSE	Pdcd11	Protein RRP5 homolog	1.89433	0.921687	0.15493	0.627073
sp|Q8CGC6|RBM28_MOUSE	Q8CGC6	RBM28_MOUSE	Rbm28	RNA-binding protein 28	1.89312	0.920769	0.155279	0.627073
sp|Q68ED3|PAPD5_MOUSE	Q68ED3	PAPD5_MOUSE	Papd5	Non-canonical poly(A) RNA polymerase PAPD5	1.89227	0.920115	0.155528	0.627073
sp|Q80WE4|KI20B_MOUSE	Q80WE4	KI20B_MOUSE	Kif20b	Kinesin-like protein KIF20B	1.88903	0.917645	0.156472	0.627073
sp|Q8R326|PSPC1_MOUSE	Q8R326	PSPC1_MOUSE	Pspc1	Paraspeckle component 1	1.88864	0.917348	0.156586	0.627073
sp|Q497V5|SRBD1_MOUSE	Q497V5	SRBD1_MOUSE	Srbd1	S1 RNA-binding domain-containing protein 1	1.88444	0.914135	0.15782	0.627073
tr|Q3TA68|Q3TA68_MOUSE	Q3TA68	Q3TA68_MOUSE	Wdr36	Protein Wdr36	1.87911	0.910047	0.159399	0.627073
sp|Q09XV5|CHD8_MOUSE	Q09XV5	CHD8_MOUSE	Chd8	Chromodomain-helicase-DNA-binding protein 8	1.87524	0.907078	0.160552	0.627073
sp|Q9CQT2|RBM7_MOUSE	Q9CQT2	RBM7_MOUSE	Rbm7	RNA-binding protein 7	1.87306	0.905399	0.161206	0.627073
sp|P23249|MOV10_MOUSE	P23249	MOV10_MOUSE	Mov10	Putative helicase MOV-10	1.87304	0.905382	0.161213	0.627073
sp|Q6KCD5|NIPBL_MOUSE	Q6KCD5	NIPBL_MOUSE	Nipbl	Nipped-B-like protein	1.87209	0.904651	0.161498	0.627073
sp|Q99ME9|NOG1_MOUSE	Q99ME9	NOG1_MOUSE	Gtpbp4	Nucleolar GTP-binding protein 1	1.86972	0.902822	0.162214	0.627073
sp|Q9R226|KHDR3_MOUSE	Q9R226	KHDR3_MOUSE	Khdrbs3	KH domain-containing, RNA-binding, signal transduction-associated protein 3	1.86541	0.89949	0.163522	0.627073
sp|Q00PI9|HNRL2_MOUSE	Q00PI9	HNRL2_MOUSE	Hnrnpul2	Heterogeneous nuclear ribonucleoprotein U-like protein 2	1.86495	0.899136	0.163662	0.627073
tr|D3YWX2|D3YWX2_MOUSE	D3YWX2	D3YWX2_MOUSE	Ylpm1	YLP motif-containing protein 1	1.86377	0.898224	0.164021	0.627073
tr|E9Q3G8|E9Q3G8_MOUSE	E9Q3G8	E9Q3G8_MOUSE	Nup153	Protein Nup153	1.85884	0.894401	0.165534	0.627073
sp|Q8BIQ5|CSTF2_MOUSE	Q8BIQ5	CSTF2_MOUSE	Cstf2	Cleavage stimulation factor subunit 2	1.85528	0.891638	0.166632	0.627073
sp|O70310|NMT1_MOUSE	O70310	NMT1_MOUSE	Nmt1	Glycylpeptide N-tetradecanoyltransferase 1	1.85289	0.889778	0.167374	0.627073
sp|Q9Z315|SNUT1_MOUSE	Q9Z315	SNUT1_MOUSE	Sart1	U4/U6.U5 tri-snRNP-associated protein 1	1.85212	0.889176	0.167615	0.627073
sp|Q9JIX8|ACINU_MOUSE	Q9JIX8	ACINU_MOUSE	Acin1	Apoptotic chromatin condensation inducer in the nucleus	1.85016	0.887651	0.168226	0.627073
sp|Q640M1|UT14A_MOUSE	Q640M1	UT14A_MOUSE	Utp14a	U3 small nucleolar RNA-associated protein 14 homolog A	1.84662	0.884889	0.169335	0.627073
sp|Q8K3Y3|LN28A_MOUSE	Q8K3Y3	LN28A_MOUSE	Lin28a	Protein lin-28 homolog A	1.84407	0.882893	0.170139	0.627073
sp|Q8BG05|ROA3_MOUSE	Q8BG05	ROA3_MOUSE	Hnrnpa3	Heterogeneous nuclear ribonucleoprotein A3	1.84357	0.882502	0.170297	0.627073
sp|Q80UU2|RPP38_MOUSE	Q80UU2	RPP38_MOUSE	Rpp38	Ribonuclease P protein subunit p38	1.83869	0.878678	0.171846	0.627073
sp|Q14B71|CDCA2_MOUSE	Q14B71	CDCA2_MOUSE	Cdca2	Cell division cycle-associated protein 2	1.8313	0.872868	0.174215	0.627073
sp|Q8BY02|NKRF_MOUSE	Q8BY02	NKRF_MOUSE	Nkrf	NF-kappa-B-repressing factor	1.83089	0.872545	0.174347	0.627073
sp|P31266|SUH_MOUSE	P31266	SUH_MOUSE	Rbpj	Recombining binding protein suppressor of hairless	1.82951	0.871455	0.174794	0.627073
tr|Q6PFF0|Q6PFF0_MOUSE	Q6PFF0	Q6PFF0_MOUSE	Scaf4	Protein Scaf4	1.82703	0.869499	0.175598	0.627073
sp|Q8C2Q3|RBM14_MOUSE	Q8C2Q3	RBM14_MOUSE	Rbm14	RNA-binding protein 14	1.82276	0.866124	0.176989	0.627073
sp|Q9QY81|PO210_MOUSE	Q9QY81	PO210_MOUSE	Nup210	Nuclear pore membrane glycoprotein 210	1.81937	0.863438	0.178102	0.627073
sp|Q8VHK9|DHX36_MOUSE	Q8VHK9	DHX36_MOUSE	Dhx36	ATP-dependent RNA helicase DHX36	1.81916	0.863274	0.17817	0.627073
sp|Q8BJ05|ZC3HE_MOUSE	Q8BJ05	ZC3HE_MOUSE	Zc3h14	Zinc finger CCCH domain-containing protein 14	1.81569	0.860515	0.179317	0.627073
sp|P14148|RL7_MOUSE	P14148	RL7_MOUSE	Rpl7	60S ribosomal protein L7	1.81102	0.856805	0.180867	0.627073
sp|Q01320|TOP2A_MOUSE	Q01320	TOP2A_MOUSE	Top2a	DNA topoisomerase 2-alpha	1.81014	0.856101	0.181162	0.627073
sp|Q9DBY8|NVL_MOUSE	Q9DBY8	NVL_MOUSE	Nvl	Nuclear valosin-containing protein-like	1.80867	0.854931	0.181654	0.627073
sp|Q8R1J3|ZCHC9_MOUSE	Q8R1J3	ZCHC9_MOUSE	Zcchc9	Zinc finger CCHC domain-containing protein 9	1.80697	0.853574	0.182224	0.627073
sp|Q9WVB0|RBPMS_MOUSE	Q9WVB0	RBPMS_MOUSE	Rbpms	RNA-binding protein with multiple splicing	1.80246	0.84997	0.183744	0.627073
tr|A2A8V7|A2A8V7_MOUSE	A2A8V7	A2A8V7_MOUSE	Gm13247	Protein Gm13247	1.79045	0.840322	0.18785	0.627073
tr|Q6PGF5|Q6PGF5_MOUSE	Q6PGF5	Q6PGF5_MOUSE	Bms1	BMS1 homolog, ribosome assembly protein (Yeast)	1.78823	0.838535	0.188617	0.627073
tr|J3QQ16|J3QQ16_MOUSE	J3QQ16	J3QQ16_MOUSE	Col6a3	Protein Col6a3	1.78741	0.837872	0.188901	0.627073
tr|E9QN31|E9QN31_MOUSE	E9QN31	E9QN31_MOUSE	Nop2	Putative ribosomal RNA methyltransferase NOP2	1.78417	0.835249	0.19003	0.627073
sp|Q8C5N3|CWC22_MOUSE	Q8C5N3	CWC22_MOUSE	Cwc22	Pre-mRNA-splicing factor CWC22 homolog	1.78302	0.834326	0.190429	0.627073
sp|Q8CD15|MINA_MOUSE	Q8CD15	MINA_MOUSE	Mina	Bifunctional lysine-specific demethylase and histidyl-hydroxylase MINA	1.7793	0.831306	0.191735	0.627073
sp|P70333|HNRH2_MOUSE	P70333	HNRH2_MOUSE	Hnrnph2	Heterogeneous nuclear ribonucleoprotein H2	1.77789	0.830165	0.19223	0.627073
sp|P53569|CEBPZ_MOUSE	P53569	CEBPZ_MOUSE	Cebpz	CCAAT/enhancer-binding protein zeta	1.77755	0.829891	0.192349	0.627073
sp|O35218|CPSF2_MOUSE	O35218	CPSF2_MOUSE	Cpsf2	Cleavage and polyadenylation specificity factor subunit 2	1.77103	0.824586	0.194661	0.627073
sp|Q8VDD9|PHIP_MOUSE	Q8VDD9	PHIP_MOUSE	Phip	PH-interacting protein	1.76684	0.821172	0.196157	0.627073
sp|Q4QY64|ATAD5_MOUSE	Q4QY64	ATAD5_MOUSE	Atad5	ATPase family AAA domain-containing protein 5	1.76452	0.819278	0.19699	0.627073
sp|Q8BJW5|NOL11_MOUSE	Q8BJW5	NOL11_MOUSE	Nol11	Nucleolar protein 11	1.76377	0.818662	0.197261	0.627073
sp|A2A791|ZMYM4_MOUSE	A2A791	ZMYM4_MOUSE	Zmym4	Zinc finger MYM-type protein 4	1.76372	0.818621	0.197279	0.627073
sp|Q921M3|SF3B3_MOUSE	Q921M3	SF3B3_MOUSE	Sf3b3	Splicing factor 3B subunit 3	1.7597	0.815328	0.198733	0.627073
sp|Q9DCA5|BRX1_MOUSE	Q9DCA5	BRX1_MOUSE	Brix1	Ribosome biogenesis protein BRX1 homolog	1.75849	0.814336	0.199173	0.627073
sp|P83917|CBX1_MOUSE	P83917	CBX1_MOUSE	Cbx1	Chromobox protein homolog 1	1.75693	0.813056	0.19974	0.627073
sp|Q99MR6|SRRT_MOUSE	Q99MR6	SRRT_MOUSE	Srrt	Serrate RNA effector molecule homolog	1.75306	0.809875	0.201154	0.627073
sp|Q61666|HIRA_MOUSE	Q61666	HIRA_MOUSE	Hira	Protein HIRA	1.75208	0.809071	0.201513	0.627073
tr|Q6NZL1|Q6NZL1_MOUSE	Q6NZL1	Q6NZL1_MOUSE	Dhx37	DEAH (Asp-Glu-Ala-His) box polypeptide 37	1.74988	0.807258	0.202322	0.627073
sp|Q6PR54|RIF1_MOUSE	Q6PR54	RIF1_MOUSE	Rif1	Telomere-associated protein RIF1	1.74661	0.804559	0.20353	0.627073
tr|Q3U821|Q3U821_MOUSE	Q3U821	Q3U821_MOUSE	Wdr75	Protein Wdr75	1.74653	0.804491	0.20356	0.627073
sp|P30051|TEAD1_MOUSE	P30051	TEAD1_MOUSE	Tead1	Transcriptional enhancer factor TEF-1	1.74052	0.799518	0.205798	0.627073
sp|Q8R2N2|CIR1A_MOUSE	Q8R2N2	CIR1A_MOUSE	Cirh1a	Cirhin	1.74001	0.799092	0.20599	0.627073
sp|Q8BFQ4|WDR82_MOUSE	Q8BFQ4	WDR82_MOUSE	Wdr82	WD repeat-containing protein 82	1.73683	0.79646	0.20718	0.627073
sp|Q64368|DAZL_MOUSE	Q64368	DAZL_MOUSE	Dazl	Deleted in azoospermia-like	1.73635	0.796057	0.207362	0.627073
sp|Q8BR65|SDS3_MOUSE	Q8BR65	SDS3_MOUSE	Suds3	Sin3 histone deacetylase corepressor complex component SDS3	1.73383	0.793959	0.208314	0.627073
sp|Q9CXK8|NIP7_MOUSE	Q9CXK8	NIP7_MOUSE	Nip7	60S ribosome subunit biogenesis protein NIP7 homolog	1.73315	0.793399	0.208568	0.627073
sp|Q8BQZ5|CPSF4_MOUSE	Q8BQZ5	CPSF4_MOUSE	Cpsf4	Cleavage and polyadenylation specificity factor subunit 4	1.73296	0.793239	0.208641	0.627073
sp|P62317|SMD2_MOUSE	P62317	SMD2_MOUSE	Snrpd2	Small nuclear ribonucleoprotein Sm D2	1.73219	0.792598	0.208933	0.627073
sp|Q9DCE5|PK1IP_MOUSE	Q9DCE5	PK1IP_MOUSE	Pak1ip1	p21-activated protein kinase-interacting protein 1	1.731	0.791609	0.209383	0.627073
sp|Q62018|CTR9_MOUSE	Q62018	CTR9_MOUSE	Ctr9	RNA polymerase-associated protein CTR9 homolog	1.72594	0.787384	0.211312	0.627073
tr|E9QNN1|E9QNN1_MOUSE	E9QNN1	E9QNN1_MOUSE	Dhx9	ATP-dependent RNA helicase A	1.72532	0.786861	0.211551	0.627073
sp|Q9ERU9|RBP2_MOUSE	Q9ERU9	RBP2_MOUSE	Ranbp2	E3 SUMO-protein ligase RanBP2	1.72373	0.785533	0.21216	0.627073
sp|Q8BKS9|K0020_MOUSE	Q8BKS9	K0020_MOUSE	Kiaa0020	Pumilio domain-containing protein KIAA0020	1.72362	0.785443	0.212202	0.627073
sp|Q9D6Z1|NOP56_MOUSE	Q9D6Z1	NOP56_MOUSE	Nop56	Nucleolar protein 56	1.72183	0.783945	0.212889	0.627073
sp|Q8BKT7|THOC5_MOUSE	Q8BKT7	THOC5_MOUSE	Thoc5	THO complex subunit 5 homolog	1.71708	0.779958	0.214725	0.627073
sp|Q9Z1N2|ORC1_MOUSE	Q9Z1N2	ORC1_MOUSE	Orc1	Origin recognition complex subunit 1	1.71657	0.779532	0.214922	0.627073
sp|Q0VEE6|ZN800_MOUSE	Q0VEE6	ZN800_MOUSE	Znf800	Zinc finger protein 800	1.71485	0.778083	0.215592	0.627073
sp|Q8K4B0|MTA1_MOUSE	Q8K4B0	MTA1_MOUSE	Mta1	Metastasis-associated protein MTA1	1.7127	0.776269	0.216432	0.627073
sp|Q8K4L0|DDX54_MOUSE	Q8K4L0	DDX54_MOUSE	Ddx54	ATP-dependent RNA helicase DDX54	1.70773	0.772077	0.218381	0.627073
tr|A3KGI3|A3KGI3_MOUSE	A3KGI3	A3KGI3_MOUSE	Casc5	Protein CASC5	1.70472	0.769535	0.219567	0.627073
sp|P47911|RL6_MOUSE	P47911	RL6_MOUSE	Rpl6	60S ribosomal protein L6	1.70417	0.769071	0.219783	0.627073
sp|Q8CG46|SMC5_MOUSE	Q8CG46	SMC5_MOUSE	Smc5	Structural maintenance of chromosomes protein 5	1.70335	0.768372	0.22011	0.627073
sp|Q9R1A8|RFWD2_MOUSE	Q9R1A8	RFWD2_MOUSE	Rfwd2	E3 ubiquitin-protein ligase RFWD2	1.70265	0.767778	0.220388	0.627073
sp|Q99KK2|NEUA_MOUSE	Q99KK2	NEUA_MOUSE	Cmas	N-acylneuraminate cytidylyltransferase	1.70184	0.767099	0.220706	0.627073
sp|Q9WUV0|ORC5_MOUSE	Q9WUV0	ORC5_MOUSE	Orc5	Origin recognition complex subunit 5	1.70048	0.765939	0.22125	0.627073
sp|Q3U1G5|I20L2_MOUSE	Q3U1G5	I20L2_MOUSE	Isg20l2	Interferon-stimulated 20 kDa exonuclease-like 2	1.69883	0.76454	0.221906	0.627073
sp|Q9WUQ2|PREB_MOUSE	Q9WUQ2	PREB_MOUSE	Preb	Prolactin regulatory element-binding protein	1.69725	0.763198	0.222537	0.627073
sp|Q3TIX9|SNUT2_MOUSE	Q3TIX9	SNUT2_MOUSE	Usp39	U4/U6.U5 tri-snRNP-associated protein 2	1.69639	0.762466	0.222882	0.627073
sp|Q9DB85|RRP8_MOUSE	Q9DB85	RRP8_MOUSE	Rrp8	Ribosomal RNA-processing protein 8	1.69472	0.761046	0.223551	0.627073
sp|Q8R2Y9|SOSB1_MOUSE	Q8R2Y9	SOSB1_MOUSE	Nabp2	SOSS complex subunit B1	1.69403	0.76046	0.223827	0.627073
sp|O88508|DNM3A_MOUSE	O88508	DNM3A_MOUSE	Dnmt3a	DNA (cytosine-5)-methyltransferase 3A	1.69394	0.760384	0.223863	0.627073
sp|O88554|PARP2_MOUSE	O88554	PARP2_MOUSE	Parp2	Poly [ADP-ribose] polymerase 2	1.68599	0.753599	0.227076	0.627073
sp|Q9CYH6|RRS1_MOUSE	Q9CYH6	RRS1_MOUSE	Rrs1	Ribosome biogenesis regulatory protein homolog	1.68483	0.752604	0.227549	0.627073
sp|Q91VN6|DDX41_MOUSE	Q91VN6	DDX41_MOUSE	Ddx41	Probable ATP-dependent RNA helicase DDX41	1.68329	0.751286	0.228177	0.627073
tr|G5E8E3|G5E8E3_MOUSE	G5E8E3	G5E8E3_MOUSE	2310022A10Rik	Protein 2310022A10Rik	1.68022	0.748654	0.229433	0.627073
sp|Q6NZF1|ZC11A_MOUSE	Q6NZF1	ZC11A_MOUSE	Zc3h11a	Zinc finger CCCH domain-containing protein 11A	1.67832	0.74702	0.230214	0.627073
sp|Q8JZM7|CDC73_MOUSE	Q8JZM7	CDC73_MOUSE	Cdc73	Parafibromin	1.67714	0.746002	0.230702	0.627073
sp|Q8K298|ANLN_MOUSE	Q8K298	ANLN_MOUSE	Anln	Actin-binding protein anillin	1.67526	0.744386	0.231477	0.627073
sp|P68433|H31_MOUSE	P68433	H31_MOUSE	Hist1h3a	Histone H3.1	1.67467	0.743875	0.231722	0.627073
sp|A2AHJ4|BRWD3_MOUSE	A2AHJ4	BRWD3_MOUSE	Brwd3	Bromodomain and WD repeat-containing protein 3	1.67221	0.741754	0.232741	0.627073
sp|Q8R3C6|RBM19_MOUSE	Q8R3C6	RBM19_MOUSE	Rbm19	Probable RNA-binding protein 19	1.67149	0.741134	0.23304	0.627073
sp|Q8VCY6|UTP6_MOUSE	Q8VCY6	UTP6_MOUSE	Utp6	U3 small nucleolar RNA-associated protein 6 homolog	1.67031	0.740113	0.233532	0.627073
sp|P53995|APC1_MOUSE	P53995	APC1_MOUSE	Anapc1	Anaphase-promoting complex subunit 1	1.67011	0.739946	0.233612	0.627073
sp|P56960|EXOSX_MOUSE	P56960	EXOSX_MOUSE	Exosc10	Exosome component 10	1.6679	0.738036	0.234534	0.627073
sp|Q61656|DDX5_MOUSE	Q61656	DDX5_MOUSE	Ddx5	Probable ATP-dependent RNA helicase DDX5	1.66759	0.737762	0.234667	0.627073
sp|Q9CZU3|SK2L2_MOUSE	Q9CZU3	SK2L2_MOUSE	Skiv2l2	Superkiller viralicidic activity 2-like 2	1.66718	0.737412	0.234836	0.627073
sp|Q8R2S9|ARP8_MOUSE	Q8R2S9	ARP8_MOUSE	Actr8	Actin-related protein 8	1.6661	0.736471	0.235291	0.627073
sp|Q61539|ERR2_MOUSE	Q61539	ERR2_MOUSE	Esrrb	Steroid hormone receptor ERR2	1.66303	0.73381	0.23658	0.627073
sp|A2AWL7|MGAP_MOUSE	A2AWL7	MGAP_MOUSE	Mga	MAX gene-associated protein	1.66223	0.733117	0.236916	0.627073
sp|P97496|SMRC1_MOUSE	P97496	SMRC1_MOUSE	Smarcc1	SWI/SNF complex subunit SMARCC1	1.66087	0.731936	0.23749	0.627073
sp|Q91YI6|GLD2_MOUSE	Q91YI6	GLD2_MOUSE	Papd4	Poly(A) RNA polymerase GLD2	1.65819	0.729613	0.23862	0.627073
sp|Q9CR47|NSA2_MOUSE	Q9CR47	NSA2_MOUSE	Nsa2	Ribosome biogenesis protein NSA2 homolog	1.65481	0.726667	0.240058	0.627073
tr|E9Q7L1|E9Q7L1_MOUSE	E9Q7L1	E9Q7L1_MOUSE	Urb2	Protein Urb2	1.65368	0.725677	0.240541	0.627073
sp|P62488|RPB7_MOUSE	P62488	RPB7_MOUSE	Polr2g	DNA-directed RNA polymerase II subunit RPB7	1.65199	0.724204	0.241262	0.627073
sp|Q8K3Z9|PO121_MOUSE	Q8K3Z9	PO121_MOUSE	Pom121	Nuclear envelope pore membrane protein POM 121	1.65187	0.724099	0.241314	0.627073
sp|Q64213|SF01_MOUSE	Q64213	SF01_MOUSE	Sf1	Splicing factor 1	1.64473	0.71785	0.244383	0.627073
sp|Q91Z31|PTBP2_MOUSE	Q91Z31	PTBP2_MOUSE	Ptbp2	Polypyrimidine tract-binding protein 2	1.6427	0.716067	0.245263	0.627073
sp|Q9D8M4|RL7L_MOUSE	Q9D8M4	RL7L_MOUSE	Rpl7l1	60S ribosomal protein L7-like 1	1.63925	0.713037	0.24676	0.627073
sp|Q3UEB3-2|PUF60_MOUSE	Q3UEB3-2	PUF60_MOUSE	Puf60	Isoform 2 of Poly(U)-binding-splicing factor PUF60	1.63841	0.712294	0.247128	0.627073
sp|Q8CJF7|ELYS_MOUSE	Q8CJF7	ELYS_MOUSE	Ahctf1	Protein ELYS	1.63739	0.711396	0.247573	0.627073
sp|Q6DFW4|NOP58_MOUSE	Q6DFW4	NOP58_MOUSE	Nop58	Nucleolar protein 58	1.63667	0.710767	0.247885	0.627073
sp|Q5SUQ9|CTC1_MOUSE	Q5SUQ9	CTC1_MOUSE	Ctc1	CST complex subunit CTC1	1.63593	0.710107	0.248212	0.627073
sp|Q9DC28|KC1D_MOUSE	Q9DC28	KC1D_MOUSE	Csnk1d	Casein kinase I isoform delta	1.63446	0.708818	0.248852	0.627073
sp|Q921M4|GOGA2_MOUSE	Q921M4	GOGA2_MOUSE	Golga2	Golgin subfamily A member 2	1.63001	0.704882	0.250812	0.627073
tr|E9Q8G3|E9Q8G3_MOUSE	E9Q8G3	E9Q8G3_MOUSE	Srcap	Protein Srcap	1.62953	0.704454	0.251025	0.627073
sp|P21107-2|TPM3_MOUSE	P21107-2	TPM3_MOUSE	Tpm3	Isoform 2 of Tropomyosin alpha-3 chain	1.62935	0.704301	0.251101	0.627073
sp|P02089|HBB2_MOUSE	P02089	HBB2_MOUSE	Hbb-b2	Hemoglobin subunit beta-2	1.62188	0.697666	0.254422	0.627073
tr|Q3V1Z5|Q3V1Z5_MOUSE	Q3V1Z5	Q3V1Z5_MOUSE	Rps4l	40S ribosomal protein S4	1.6217	0.69751	0.2545	0.627073
tr|F8VPM0|F8VPM0_MOUSE	F8VPM0	F8VPM0_MOUSE	Baz2a	Bromodomain adjacent to zinc finger domain protein 2A	1.62149	0.69732	0.254595	0.627073
sp|Q80X82|SYMPK_MOUSE	Q80X82	SYMPK_MOUSE	Sympk	Symplekin	1.61804	0.694249	0.256139	0.627073
sp|Q8VEK3|HNRPU_MOUSE	Q8VEK3	HNRPU_MOUSE	Hnrnpu	Heterogeneous nuclear ribonucleoprotein U	1.61567	0.692136	0.257204	0.627073
sp|Q91ZW3|SMCA5_MOUSE	Q91ZW3	SMCA5_MOUSE	Smarca5	SWI/SNF-related matrix-associated actin-dependent regulator of chromatin subfamily A member 5	1.61443	0.691023	0.257765	0.627073
sp|Q80Y44|DDX10_MOUSE	Q80Y44	DDX10_MOUSE	Ddx10	Probable ATP-dependent RNA helicase DDX10	1.61349	0.69018	0.258191	0.627073
sp|Q99LI7|CSTF3_MOUSE	Q99LI7	CSTF3_MOUSE	Cstf3	Cleavage stimulation factor subunit 3	1.61277	0.68954	0.258514	0.627073
sp|O08811|ERCC2_MOUSE	O08811	ERCC2_MOUSE	Ercc2	TFIIH basal transcription factor complex helicase XPD subunit	1.61197	0.688824	0.258876	0.627073
sp|Q5RJY2|G2E3_MOUSE	Q5RJY2	G2E3_MOUSE	G2e3	G2/M phase-specific E3 ubiquitin-protein ligase	1.61162	0.68851	0.259035	0.627073
sp|P06151|LDHA_MOUSE	P06151	LDHA_MOUSE	Ldha	L-lactate dehydrogenase A chain	1.61147	0.688377	0.259102	0.627073
sp|Q8K301|DDX52_MOUSE	Q8K301	DDX52_MOUSE	Ddx52	Probable ATP-dependent RNA helicase DDX52	1.60866	0.685859	0.260377	0.627073
sp|Q3TZX8|NOL9_MOUSE	Q3TZX8	NOL9_MOUSE	Nol9	Polynucleotide 5'-hydroxyl-kinase NOL9	1.60672	0.684114	0.261263	0.627073
tr|E9PWT1|E9PWT1_MOUSE	E9PWT1	E9PWT1_MOUSE	Trrap	Transformation/transcription domain-associated protein	1.60659	0.683998	0.261322	0.627073
sp|P35980|RL18_MOUSE	P35980	RL18_MOUSE	Rpl18	60S ribosomal protein L18	1.60449	0.682113	0.26228	0.627073
sp|Q9WVF7|DPOE1_MOUSE	Q9WVF7	DPOE1_MOUSE	Pole	DNA polymerase epsilon catalytic subunit A	1.60441	0.68204	0.262317	0.627073
tr|E9Q2I4|E9Q2I4_MOUSE	E9Q2I4	E9Q2I4_MOUSE	Elmsan1	Protein Elmsan1	1.59978	0.677877	0.264438	0.627073
sp|P32037|GTR3_MOUSE	P32037	GTR3_MOUSE	Slc2a3	Solute carrier family 2, facilitated glucose transporter member 3	1.59921	0.677359	0.264702	0.627073
sp|Q8BUI3|LRWD1_MOUSE	Q8BUI3	LRWD1_MOUSE	LRWD1	Leucine-rich repeat and WD repeat-containing protein 1	1.59853	0.676745	0.265016	0.627073
sp|Q8BHX3|BOREA_MOUSE	Q8BHX3	BOREA_MOUSE	Cdca8	Borealin	1.59844	0.676665	0.265056	0.627073
sp|Q9CR08|RPP29_MOUSE	Q9CR08	RPP29_MOUSE	Pop4	Ribonuclease P protein subunit p29	1.59773	0.67602	0.265386	0.627073
sp|Q6ZQH8|NU188_MOUSE	Q6ZQH8	NU188_MOUSE	Nup188	Nucleoporin NUP188 homolog	1.59675	0.675135	0.265839	0.627073
sp|Q9EP69|SAC1_MOUSE	Q9EP69	SAC1_MOUSE	Sacm1l	Phosphatidylinositide phosphatase SAC1	1.59587	0.674344	0.266243	0.627073
sp|Q9Z148|EHMT2_MOUSE	Q9Z148	EHMT2_MOUSE	Ehmt2	Histone-lysine N-methyltransferase EHMT2	1.5954	0.673914	0.266463	0.627073
sp|Q9CQQ7|AT5F1_MOUSE	Q9CQQ7	AT5F1_MOUSE	Atp5f1	ATP synthase F(0) complex subunit B1, mitochondrial	1.59285	0.671614	0.267642	0.627073
sp|Q8BHB4|WDR3_MOUSE	Q8BHB4	WDR3_MOUSE	Wdr3	WD repeat-containing protein 3	1.58781	0.667035	0.269995	0.627073
sp|Q8VE37|RCC1_MOUSE	Q8VE37	RCC1_MOUSE	Rcc1	Regulator of chromosome condensation	1.58756	0.666809	0.270111	0.627073
sp|Q923B1|DBR1_MOUSE	Q923B1	DBR1_MOUSE	Dbr1	Lariat debranching enzyme	1.58644	0.665791	0.270636	0.627073
sp|Q80U93|NU214_MOUSE	Q80U93	NU214_MOUSE	Nup214	Nuclear pore complex protein Nup214	1.58633	0.665696	0.270685	0.627073
sp|Q6NXK2|ZN532_MOUSE	Q6NXK2	ZN532_MOUSE	Znf532	Zinc finger protein 532	1.5846	0.664121	0.271497	0.627073
sp|Q8C176|TAF2_MOUSE	Q8C176	TAF2_MOUSE	Taf2	Transcription initiation factor TFIID subunit 2	1.5808	0.660657	0.273286	0.627073
sp|Q6DID3|SCAF8_MOUSE	Q6DID3	SCAF8_MOUSE	Scaf8	Protein SCAF8	1.58012	0.660035	0.273608	0.627073
sp|Q9EST5|AN32B_MOUSE	Q9EST5	AN32B_MOUSE	Anp32b	Acidic leucine-rich nuclear phosphoprotein 32 family member B	1.57936	0.659341	0.273967	0.627073
tr|F7B5B5|F7B5B5_MOUSE	F7B5B5	F7B5B5_MOUSE	Hnrnpr	Protein Hnrnpr	1.57778	0.657895	0.274716	0.627073
sp|Q921N6|DDX27_MOUSE	Q921N6	DDX27_MOUSE	Ddx27	Probable ATP-dependent RNA helicase DDX27	1.57479	0.655163	0.276134	0.627073
sp|Q8BG79|C19L2_MOUSE	Q8BG79	C19L2_MOUSE	Cwf19l2	CWF19-like protein 2	1.57477	0.655145	0.276143	0.627073
sp|Q9CTH6|FCF1_MOUSE	Q9CTH6	FCF1_MOUSE	Fcf1	rRNA-processing protein FCF1 homolog	1.57431	0.654723	0.276363	0.627073
tr|B8JJZ4|B8JJZ4_MOUSE	B8JJZ4	B8JJZ4_MOUSE	Zfp808	Protein Zfp808	1.57148	0.65212	0.277716	0.627073
sp|Q9Z0W3|NU160_MOUSE	Q9Z0W3	NU160_MOUSE	Nup160	Nuclear pore complex protein Nup160	1.57128	0.651938	0.277811	0.627073
sp|O35130|NEP1_MOUSE	O35130	NEP1_MOUSE	Emg1	Ribosomal RNA small subunit methyltransferase NEP1	1.57016	0.650915	0.278344	0.627073
sp|Q8CEC0|NUP88_MOUSE	Q8CEC0	NUP88_MOUSE	Nup88	Nuclear pore complex protein Nup88	1.56686	0.647877	0.279928	0.627073
sp|Q9WV70|NOC2L_MOUSE	Q9WV70	NOC2L_MOUSE	Noc2l	Nucleolar complex protein 2 homolog	1.56681	0.647831	0.279952	0.627073
sp|Q9R207|NBN_MOUSE	Q9R207	NBN_MOUSE	Nbn	Nibrin	1.56638	0.647435	0.280159	0.627073
sp|Q8BJL0|SMAL1_MOUSE	Q8BJL0	SMAL1_MOUSE	Smarcal1	SWI/SNF-related matrix-associated actin-dependent regulator of chromatin subfamily A-like protein 1	1.56604	0.647125	0.280321	0.627073
tr|Q91V89|Q91V89_MOUSE	Q91V89	Q91V89_MOUSE	Ppp2r5d	Protein Ppp2r5d	1.56516	0.646306	0.280749	0.627073
sp|P62849|RS24_MOUSE	P62849	RS24_MOUSE	Rps24	40S ribosomal protein S24	1.5646	0.645794	0.281016	0.627073
sp|Q6P5B0|RRP12_MOUSE	Q6P5B0	RRP12_MOUSE	Rrp12	RRP12-like protein	1.56293	0.644254	0.281822	0.627073
sp|Q9CX86|ROA0_MOUSE	Q9CX86	ROA0_MOUSE	Hnrnpa0	Heterogeneous nuclear ribonucleoprotein A0	1.56267	0.64401	0.28195	0.627073
tr|Q91VU7|Q91VU7_MOUSE	Q91VU7	Q91VU7_MOUSE	Pus7	Protein Pus7	1.55747	0.639203	0.284471	0.627073
sp|Q5RJG1|NOL10_MOUSE	Q5RJG1	NOL10_MOUSE	Nol10	Nucleolar protein 10	1.55709	0.638852	0.284655	0.627073
sp|Q60520|SIN3A_MOUSE	Q60520	SIN3A_MOUSE	Sin3a	Paired amphipathic helix protein Sin3a	1.55707	0.638829	0.284667	0.627073
sp|Q9WU62|INCE_MOUSE	Q9WU62	INCE_MOUSE	Incenp	Inner centromere protein	1.55699	0.638761	0.284703	0.627073
sp|Q921E6|EED_MOUSE	Q921E6	EED_MOUSE	Eed	Polycomb protein EED	1.55615	0.637984	0.285111	0.627073
sp|Q9JJ80|RPF2_MOUSE	Q9JJ80	RPF2_MOUSE	Rpf2	Ribosome production factor 2 homolog	1.55612	0.637953	0.285128	0.627073
sp|Q5SSI6|UTP18_MOUSE	Q5SSI6	UTP18_MOUSE	Utp18	U3 small nucleolar RNA-associated protein 18 homolog	1.55496	0.636877	0.285694	0.627073
sp|B1AQJ2|UBP36_MOUSE	B1AQJ2	UBP36_MOUSE	Usp36	Ubiquitin carboxyl-terminal hydrolase 36	1.55415	0.636126	0.286089	0.627073
sp|Q3URQ0|TEX10_MOUSE	Q3URQ0	TEX10_MOUSE	Tex10	Testis-expressed sequence 10 protein	1.55302	0.635078	0.28664	0.627073
tr|D3YTQ3|D3YTQ3_MOUSE	D3YTQ3	D3YTQ3_MOUSE	Hnrnpdl	Heterogeneous nuclear ribonucleoprotein D-like	1.54985	0.632125	0.288198	0.627073
sp|Q9ESX5|DKC1_MOUSE	Q9ESX5	DKC1_MOUSE	Dkc1	H/ACA ribonucleoprotein complex subunit 4	1.5422	0.624988	0.291973	0.627073
sp|O88569|ROA2_MOUSE	O88569	ROA2_MOUSE	Hnrnpa2b1	Heterogeneous nuclear ribonucleoproteins A2/B1	1.53983	0.622771	0.293149	0.627073
sp|Q9Z321|TOP3B_MOUSE	Q9Z321	TOP3B_MOUSE	Top3b	DNA topoisomerase 3-beta-1	1.53756	0.620641	0.294281	0.627073
sp|Q99LC2|CSTF1_MOUSE	Q99LC2	CSTF1_MOUSE	Cstf1	Cleavage stimulation factor subunit 1	1.5375	0.620582	0.294312	0.627073
sp|Q99KP6|PRP19_MOUSE	Q99KP6	PRP19_MOUSE	Prpf19	Pre-mRNA-processing factor 19	1.53746	0.620549	0.294329	0.627073
sp|Q9CSH3|RRP44_MOUSE	Q9CSH3	RRP44_MOUSE	Dis3	Exosome complex exonuclease RRP44	1.53706	0.620175	0.294528	0.627073
sp|Q62315|JARD2_MOUSE	Q62315	JARD2_MOUSE	Jarid2	Protein Jumonji	1.53701	0.620129	0.294553	0.627073
sp|Q8BJW7|EME1_MOUSE	Q8BJW7	EME1_MOUSE	Eme1	Crossover junction endonuclease EME1	1.53637	0.619527	0.294873	0.627073
sp|P97329|KI20A_MOUSE	P97329	KI20A_MOUSE	Kif20a	Kinesin-like protein KIF20A	1.53577	0.618967	0.295171	0.627073
sp|Q80VY9|DHX33_MOUSE	Q80VY9	DHX33_MOUSE	Dhx33	Putative ATP-dependent RNA helicase DHX33	1.53545	0.618665	0.295332	0.627073
tr|E9PWW9|E9PWW9_MOUSE	E9PWW9	E9PWW9_MOUSE	Rsf1	Protein Rsf1	1.53438	0.617654	0.29587	0.627073
sp|Q3TWF6|WDR70_MOUSE	Q3TWF6	WDR70_MOUSE	Wdr70	WD repeat-containing protein 70	1.534	0.617302	0.296058	0.627073
sp|P52912|TIA1_MOUSE	P52912	TIA1_MOUSE	Tia1	Nucleolysin TIA-1	1.53372	0.617036	0.296199	0.627073
sp|Q8CHI8|EP400_MOUSE	Q8CHI8	EP400_MOUSE	Ep400	E1A-binding protein p400	1.53355	0.616872	0.296287	0.627073
sp|Q3UPF5|ZCCHV_MOUSE	Q3UPF5	ZCCHV_MOUSE	Zc3hav1	Zinc finger CCCH-type antiviral protein 1	1.53175	0.615179	0.297189	0.627073
sp|P08775|RPB1_MOUSE	P08775	RPB1_MOUSE	Polr2a	DNA-directed RNA polymerase II subunit RPB1	1.53092	0.614395	0.297607	0.627073
sp|Q8CIB9|ESCO2_MOUSE	Q8CIB9	ESCO2_MOUSE	Esco2	N-acetyltransferase ESCO2	1.53041	0.613917	0.297862	0.627073
sp|Q8K224|NAT10_MOUSE	Q8K224	NAT10_MOUSE	Nat10	N-acetyltransferase 10	1.52948	0.613043	0.298329	0.627073
sp|Q8BU00|IKZF5_MOUSE	Q8BU00	IKZF5_MOUSE	Ikzf5	Zinc finger protein Pegasus	1.52661	0.610333	0.299777	0.627073
sp|Q9Z205-2|RFXK_MOUSE	Q9Z205-2	RFXK_MOUSE	Rfxank	Isoform Short of DNA-binding protein RFXANK	1.52362	0.607508	0.30129	0.627073
sp|P09405|NUCL_MOUSE	P09405	NUCL_MOUSE	Ncl	Nucleolin	1.52338	0.607278	0.301413	0.627073
sp|P58742|AAAS_MOUSE	P58742	AAAS_MOUSE	Aaas	Aladin	1.52247	0.606415	0.301876	0.627073
sp|Q8C5L7|RBM34_MOUSE	Q8C5L7	RBM34_MOUSE	Rbm34	RNA-binding protein 34	1.5197	0.603785	0.303286	0.627073
sp|O08997|ATOX1_MOUSE	O08997	ATOX1_MOUSE	Atox1	Copper transport protein ATOX1	1.51832	0.60248	0.303987	0.627073
tr|B9EJ54|B9EJ54_MOUSE	B9EJ54	B9EJ54_MOUSE	Nup205	MCG21756, isoform CRA_b	1.51625	0.600503	0.30505	0.627073
tr|Q6ZWZ4|Q6ZWZ4_MOUSE	Q6ZWZ4	Q6ZWZ4_MOUSE	Rpl36	60S ribosomal protein L36	1.51494	0.599262	0.305717	0.627073
sp|Q8R3P6|VWA9_MOUSE	Q8R3P6	VWA9_MOUSE	Vwa9	von Willebrand factor A domain-containing protein 9	1.51382	0.598195	0.306292	0.627073
sp|O08550|KMT2B_MOUSE	O08550	KMT2B_MOUSE	Kmt2b	Histone-lysine N-methyltransferase 2B	1.51319	0.597589	0.306618	0.627073
tr|G3X963|G3X963_MOUSE	G3X963	G3X963_MOUSE	Atad2	ATPase family AAA domain-containing protein 2	1.51208	0.596535	0.307186	0.627073
sp|P24788|CD11B_MOUSE	P24788	CD11B_MOUSE	Cdk11b	Cyclin-dependent kinase 11B	1.51077	0.59528	0.307863	0.627073
sp|Q8R480|NUP85_MOUSE	Q8R480	NUP85_MOUSE	Nup85	Nuclear pore complex protein Nup85	1.50849	0.593101	0.309039	0.627073
sp|Q8CHC8|ADNP2_MOUSE	Q8CHC8	ADNP2_MOUSE	Adnp2	ADNP homeobox protein 2	1.50623	0.590946	0.310203	0.627073
tr|F6RGI3|F6RGI3_MOUSE	F6RGI3	F6RGI3_MOUSE	Gm340	Protein Gm340	1.50216	0.587035	0.312319	0.627073
tr|E9QA25|E9QA25_MOUSE	E9QA25	E9QA25_MOUSE	Cecr2	Protein Cecr2	1.50064	0.585575	0.31311	0.627073
tr|Q9D4G5|Q9D4G5_MOUSE	Q9D4G5	Q9D4G5_MOUSE	Pop1	Blood vessel epicardial substance	1.49906	0.584058	0.313932	0.627073
sp|Q9CXS4|CENPV_MOUSE	Q9CXS4	CENPV_MOUSE	Cenpv	Centromere protein V	1.49875	0.583764	0.314091	0.627073
sp|O70157|TOP3A_MOUSE	O70157	TOP3A_MOUSE	Top3a	DNA topoisomerase 3-alpha	1.49653	0.581623	0.315253	0.627073
sp|P43274|H14_MOUSE	P43274	H14_MOUSE	Hist1h1e	Histone H1.4	1.49638	0.581478	0.315332	0.627073
sp|Q920B9|SP16H_MOUSE	Q920B9	SP16H_MOUSE	Supt16h	FACT complex subunit SPT16	1.49618	0.581284	0.315437	0.627073
sp|Q5XG71|UTP20_MOUSE	Q5XG71	UTP20_MOUSE	Utp20	Small subunit processome component 20 homolog	1.49553	0.580655	0.315779	0.627073
sp|G5E870|TRIPC_MOUSE	G5E870	TRIPC_MOUSE	Trip12	E3 ubiquitin-protein ligase TRIP12	1.49528	0.580417	0.315908	0.627073
sp|P84104|SRSF3_MOUSE	P84104	SRSF3_MOUSE	Srsf3	Serine/arginine-rich splicing factor 3	1.49475	0.579905	0.316187	0.627073
sp|Q9DC23|DJC10_MOUSE	Q9DC23	DJC10_MOUSE	Dnajc10	DnaJ homolog subfamily C member 10	1.49279	0.578009	0.317217	0.627073
sp|A2AJK6|CHD7_MOUSE	A2AJK6	CHD7_MOUSE	Chd7	Chromodomain-helicase-DNA-binding protein 7	1.49233	0.577571	0.317456	0.627073
sp|Q810D6|GRWD1_MOUSE	Q810D6	GRWD1_MOUSE	Grwd1	Glutamate-rich WD repeat-containing protein 1	1.49112	0.576393	0.318097	0.627073
sp|Q8BJ71|NUP93_MOUSE	Q8BJ71	NUP93_MOUSE	Nup93	Nuclear pore complex protein Nup93	1.48868	0.574038	0.319379	0.627073
sp|Q6DID5|MUM1_MOUSE	Q6DID5	MUM1_MOUSE	Mum1	PWWP domain-containing protein MUM1	1.48778	0.573162	0.319856	0.627073
sp|O09106|HDAC1_MOUSE	O09106	HDAC1_MOUSE	Hdac1	Histone deacetylase 1	1.4866	0.572021	0.320479	0.627073
sp|Q9ESV0|DDX24_MOUSE	Q9ESV0	DDX24_MOUSE	Ddx24	ATP-dependent RNA helicase DDX24	1.48653	0.571945	0.32052	0.627073
sp|Q6P9R1|DDX51_MOUSE	Q6P9R1	DDX51_MOUSE	Ddx51	ATP-dependent RNA helicase DDX51	1.48643	0.571856	0.320569	0.627073
sp|Q810V0|MPP10_MOUSE	Q810V0	MPP10_MOUSE	Mphosph10	U3 small nucleolar ribonucleoprotein protein MPP10	1.48607	0.571497	0.320764	0.627073
sp|Q07832|PLK1_MOUSE	Q07832	PLK1_MOUSE	Plk1	Serine/threonine-protein kinase PLK1	1.48553	0.570973	0.32105	0.627073
sp|Q91VX2|UBAP2_MOUSE	Q91VX2	UBAP2_MOUSE	Ubap2	Ubiquitin-associated protein 2	1.48552	0.57097	0.321052	0.627073
sp|Q8C092|TAF5_MOUSE	Q8C092	TAF5_MOUSE	Taf5	Transcription initiation factor TFIID subunit 5	1.48474	0.570207	0.321468	0.627073
sp|Q8CIM8|INT4_MOUSE	Q8CIM8	INT4_MOUSE	Ints4	Integrator complex subunit 4	1.48433	0.569808	0.321686	0.627073
sp|Q69Z99|ZN512_MOUSE	Q69Z99	ZN512_MOUSE	Znf512	Zinc finger protein 512	1.48345	0.568959	0.322149	0.627073
sp|Q80X41|VRK1_MOUSE	Q80X41	VRK1_MOUSE	Vrk1	Serine/threonine-protein kinase VRK1	1.47972	0.565323	0.324136	0.627073
sp|Q7TMK9|HNRPQ_MOUSE	Q7TMK9	HNRPQ_MOUSE	Syncrip	Heterogeneous nuclear ribonucleoprotein Q	1.47796	0.563611	0.325073	0.627073
sp|Q8C4J7|TBL3_MOUSE	Q8C4J7	TBL3_MOUSE	Tbl3	Transducin beta-like protein 3	1.47424	0.559971	0.327066	0.627073
sp|O08810|U5S1_MOUSE	O08810	U5S1_MOUSE	Eftud2	116 kDa U5 small nuclear ribonucleoprotein component	1.47384	0.559584	0.327278	0.627073
sp|Q922V4|PLRG1_MOUSE	Q922V4	PLRG1_MOUSE	Plrg1	Pleiotropic regulator 1	1.47254	0.558305	0.32798	0.627073
sp|Q9JJA4|WDR12_MOUSE	Q9JJA4	WDR12_MOUSE	Wdr12	Ribosome biogenesis protein WDR12	1.4721	0.557876	0.328215	0.627073
tr|A2A654|A2A654_MOUSE	A2A654	A2A654_MOUSE	Bptf	Protein Bptf	1.47014	0.555957	0.329268	0.627073
tr|E9Q7G0|E9Q7G0_MOUSE	E9Q7G0	E9Q7G0_MOUSE	Numa1	Protein Numa1	1.46962	0.555444	0.32955	0.627073
sp|Q8CCG4|DPPA4_MOUSE	Q8CCG4	DPPA4_MOUSE	Dppa4	Developmental pluripotency-associated protein 4	1.46853	0.554368	0.33014	0.627073
sp|Q8R2U0|SEH1_MOUSE	Q8R2U0	SEH1_MOUSE	Seh1l	Nucleoporin SEH1	1.46833	0.554172	0.330248	0.627073
sp|Q8VHX6|FLNC_MOUSE	Q8VHX6	FLNC_MOUSE	Flnc	Filamin-C	1.46777	0.553624	0.330549	0.627073
sp|P62267|RS23_MOUSE	P62267	RS23_MOUSE	Rps23	40S ribosomal protein S23	1.46704	0.552905	0.330944	0.627073
sp|O35134|RPA1_MOUSE	O35134	RPA1_MOUSE	Polr1a	DNA-directed RNA polymerase I subunit RPA1	1.46664	0.552513	0.331159	0.627073
sp|Q62383|SPT6H_MOUSE	Q62383	SPT6H_MOUSE	Supt6h	Transcription elongation factor SPT6	1.4642	0.550115	0.332478	0.627073
sp|Q3V300|KIF22_MOUSE	Q3V300	KIF22_MOUSE	Kif22	Kinesin-like protein KIF22	1.46321	0.549139	0.333015	0.627073
sp|P97820|M4K4_MOUSE	P97820	M4K4_MOUSE	Map4k4	Mitogen-activated protein kinase kinase kinase kinase 4	1.4629	0.548831	0.333184	0.627073
sp|P11103|PARP1_MOUSE	P11103	PARP1_MOUSE	Parp1	Poly [ADP-ribose] polymerase 1	1.4596	0.545578	0.334975	0.627073
sp|Q9CWU9|NUP37_MOUSE	Q9CWU9	NUP37_MOUSE	Nup37	Nucleoporin Nup37	1.45821	0.544197	0.335736	0.627073
sp|Q8VDQ9|KRI1_MOUSE	Q8VDQ9	KRI1_MOUSE	Kri1	Protein KRI1 homolog	1.45649	0.542493	0.336676	0.627073
sp|Q9JL70|FANCA_MOUSE	Q9JL70	FANCA_MOUSE	Fanca	Fanconi anemia group A protein homolog	1.4551	0.541114	0.337436	0.627073
sp|O88974|SETB1_MOUSE	O88974	SETB1_MOUSE	Setdb1	Histone-lysine N-methyltransferase SETDB1	1.455	0.54102	0.337488	0.627073
sp|Q91WM1|STRBP_MOUSE	Q91WM1	STRBP_MOUSE	Strbp	Spermatid perinuclear RNA-binding protein	1.45486	0.540881	0.337565	0.627073
sp|Q9CXJ1|SYEM_MOUSE	Q9CXJ1	SYEM_MOUSE	Ears2	Probable glutamate--tRNA ligase, mitochondrial	1.45441	0.540432	0.337813	0.627073
sp|Q9Z277|BAZ1B_MOUSE	Q9Z277	BAZ1B_MOUSE	Baz1b	Tyrosine-protein kinase BAZ1B	1.45416	0.540187	0.337948	0.627073
sp|P49452|CENPC_MOUSE	P49452	CENPC_MOUSE	Cenpc	Centromere protein C	1.45236	0.538402	0.338933	0.627073
sp|P60335|PCBP1_MOUSE	P60335	PCBP1_MOUSE	Pcbp1	Poly(rC)-binding protein 1	1.4519	0.537946	0.339185	0.627073
sp|O88532|ZFR_MOUSE	O88532	ZFR_MOUSE	Zfr	Zinc finger RNA-binding protein	1.45147	0.53752	0.33942	0.627073
sp|Q9QXE7|TBL1X_MOUSE	Q9QXE7	TBL1X_MOUSE	Tbl1x	F-box-like/WD repeat-containing protein TBL1X	1.44947	0.535526	0.340522	0.627073
sp|Q99P88|NU155_MOUSE	Q99P88	NU155_MOUSE	Nup155	Nuclear pore complex protein Nup155	1.44916	0.535216	0.340693	0.627073
sp|O35621|PMM1_MOUSE	O35621	PMM1_MOUSE	Pmm1	Phosphomannomutase 1	1.44877	0.534831	0.340906	0.627073
sp|Q8BFV2|PCID2_MOUSE	Q8BFV2	PCID2_MOUSE	Pcid2	PCI domain-containing protein 2	1.44795	0.534009	0.34136	0.627073
sp|Q9D0F6|RFC5_MOUSE	Q9D0F6	RFC5_MOUSE	Rfc5	Replication factor C subunit 5	1.44694	0.533001	0.341918	0.627073
sp|Q6P5D8|SMHD1_MOUSE	Q6P5D8	SMHD1_MOUSE	Smchd1	Structural maintenance of chromosomes flexible hinge domain-containing protein 1	1.44388	0.529946	0.343608	0.627073
sp|P14115|RL27A_MOUSE	P14115	RL27A_MOUSE	Rpl27a	60S ribosomal protein L27a	1.44304	0.52911	0.344071	0.627073
sp|A2A432|CUL4B_MOUSE	A2A432	CUL4B_MOUSE	Cul4b	Cullin-4B	1.44222	0.528288	0.344526	0.627073
sp|Q9D4H8|CUL2_MOUSE	Q9D4H8	CUL2_MOUSE	Cul2	Cullin-2	1.44184	0.527911	0.344735	0.627073
sp|Q8VCD7|KDM4C_MOUSE	Q8VCD7	KDM4C_MOUSE	Kdm4c	Lysine-specific demethylase 4C	1.44142	0.527492	0.344967	0.627073
sp|Q8BIZ6|SNIP1_MOUSE	Q8BIZ6	SNIP1_MOUSE	Snip1	Smad nuclear-interacting protein 1	1.43982	0.525893	0.345853	0.627073
sp|Q9CW46|RAVR1_MOUSE	Q9CW46	RAVR1_MOUSE	Raver1	Ribonucleoprotein PTB-binding 1	1.43982	0.52589	0.345854	0.627073
sp|Q9CXK9|RBM33_MOUSE	Q9CXK9	RBM33_MOUSE	Rbm33	RNA-binding protein 33	1.43783	0.52389	0.346962	0.627073
sp|Q8BZH4|POGZ_MOUSE	Q8BZH4	POGZ_MOUSE	Pogz	Pogo transposable element with ZNF domain	1.43672	0.522774	0.347581	0.627073
sp|Q6P4S8|INT1_MOUSE	Q6P4S8	INT1_MOUSE	Ints1	Integrator complex subunit 1	1.43608	0.522138	0.347934	0.627073
sp|Q6ZQF0|TOPB1_MOUSE	Q6ZQF0	TOPB1_MOUSE	Topbp1	DNA topoisomerase 2-binding protein 1	1.43561	0.521666	0.348196	0.627073
sp|Q64133|AOFA_MOUSE	Q64133	AOFA_MOUSE	Maoa	Amine oxidase [flavin-containing] A	1.43497	0.521017	0.348556	0.627073
sp|Q8VDP2|CX056_MOUSE	Q8VDP2	CX056_MOUSE	>sp|Q8VDP2|CX056_MOUSE	UPF0428 protein CXorf56 homolog	1.43423	0.52028	0.348965	0.627073
tr|A2A7V0|A2A7V0_MOUSE	A2A7V0	A2A7V0_MOUSE	Zfp600	Protein Zfp600	1.43345	0.519489	0.349403	0.627073
sp|P97386|DNLI3_MOUSE	P97386	DNLI3_MOUSE	Lig3	DNA ligase 3	1.43258	0.518619	0.349886	0.627073
sp|Q9DBR1|XRN2_MOUSE	Q9DBR1	XRN2_MOUSE	Xrn2	5'-3' exoribonuclease 2	1.43218	0.518213	0.350112	0.627073
sp|Q6PFD9|NUP98_MOUSE	Q6PFD9	NUP98_MOUSE	Nup98	Nuclear pore complex protein Nup98-Nup96	1.42897	0.514974	0.351911	0.627073
sp|Q69ZN7|MYOF_MOUSE	Q69ZN7	MYOF_MOUSE	Myof	Myoferlin	1.42872	0.514728	0.352047	0.627073
sp|Q4VBE8|WDR18_MOUSE	Q4VBE8	WDR18_MOUSE	Wdr18	WD repeat-containing protein 18	1.42779	0.513787	0.35257	0.627073
sp|Q80WQ8|M18BP_MOUSE	Q80WQ8	M18BP_MOUSE	Mis18bp1	Mis18-binding protein 1	1.42251	0.508435	0.355545	0.627073
sp|Q6PGB8|SMCA1_MOUSE	Q6PGB8	SMCA1_MOUSE	Smarca1	Probable global transcription activator SNF2L1	1.422	0.507923	0.35583	0.627073
sp|P27659|RL3_MOUSE	P27659	RL3_MOUSE	Rpl3	60S ribosomal protein L3	1.41657	0.502401	0.358904	0.627073
sp|Q8BK67|RCC2_MOUSE	Q8BK67	RCC2_MOUSE	Rcc2	Protein RCC2	1.4125	0.498253	0.361214	0.627073
sp|Q9Z2Z6|MCAT_MOUSE	Q9Z2Z6	MCAT_MOUSE	Slc25a20	Mitochondrial carnitine/acylcarnitine carrier protein	1.41246	0.498213	0.361236	0.627073
sp|Q6NZQ4|PAXI1_MOUSE	Q6NZQ4	PAXI1_MOUSE	Paxip1	PAX-interacting protein 1	1.41162	0.497347	0.361719	0.627073
sp|Q9ERG0|LIMA1_MOUSE	Q9ERG0	LIMA1_MOUSE	Lima1	LIM domain and actin-binding protein 1	1.4112	0.496919	0.361958	0.627073
sp|P06837|NEUM_MOUSE	P06837	NEUM_MOUSE	Gap43	Neuromodulin	1.40982	0.495511	0.362742	0.627073
sp|Q8VDF2|UHRF1_MOUSE	Q8VDF2	UHRF1_MOUSE	Uhrf1	E3 ubiquitin-protein ligase UHRF1	1.40946	0.495146	0.362945	0.627073
sp|Q8VCB1|NDC1_MOUSE	Q8VCB1	NDC1_MOUSE	Ndc1	Nucleoporin NDC1	1.40922	0.494901	0.363082	0.627073
sp|Q61687|ATRX_MOUSE	Q61687	ATRX_MOUSE	Atrx	Transcriptional regulator ATRX	1.40718	0.49281	0.364248	0.627073
sp|Q9WTM5|RUVB2_MOUSE	Q9WTM5	RUVB2_MOUSE	Ruvbl2	RuvB-like 2	1.40632	0.491927	0.364741	0.627073
sp|Q9D1C9|RRP7A_MOUSE	Q9D1C9	RRP7A_MOUSE	Rrp7a	Ribosomal RNA-processing protein 7 homolog A	1.40593	0.491525	0.364964	0.627073
tr|A2BDX0|A2BDX0_MOUSE	A2BDX0	A2BDX0_MOUSE	Adnp	Activity-dependent neuroprotector homeobox protein	1.40411	0.48966	0.366005	0.627073
sp|Q7TPQ3|SHPRH_MOUSE	Q7TPQ3	SHPRH_MOUSE	Shprh	E3 ubiquitin-protein ligase SHPRH	1.40122	0.486681	0.367667	0.627073
tr|G3X9B1|G3X9B1_MOUSE	G3X9B1	G3X9B1_MOUSE	Heatr1	HEAT repeat containing 1	1.40043	0.485865	0.368122	0.627073
sp|Q64511|TOP2B_MOUSE	Q64511	TOP2B_MOUSE	Top2b	DNA topoisomerase 2-beta	1.39885	0.484236	0.369031	0.627073
sp|Q99MU3|DSRAD_MOUSE	Q99MU3	DSRAD_MOUSE	Adar	Double-stranded RNA-specific adenosine deaminase	1.39868	0.484066	0.369126	0.627073
sp|A6PWY4|WDR76_MOUSE	A6PWY4	WDR76_MOUSE	Wdr76	WD repeat-containing protein 76	1.39845	0.483829	0.369258	0.627073
sp|Q65Z40|WAPL_MOUSE	Q65Z40	WAPL_MOUSE	Wapal	Wings apart-like protein homolog	1.39561	0.480892	0.370898	0.627073
sp|Q99M73|KRT84_MOUSE	Q99M73	KRT84_MOUSE	Krt84	Keratin, type II cuticular Hb4	1.39219	0.477361	0.372869	0.627073
sp|Q6ZPV2|INO80_MOUSE	Q6ZPV2	INO80_MOUSE	Ino80	DNA helicase INO80	1.39167	0.476812	0.373175	0.627073
sp|Q05CL8|LARP7_MOUSE	Q05CL8	LARP7_MOUSE	Larp7	La-related protein 7	1.38879	0.473828	0.374842	0.627073
sp|Q64127|TIF1A_MOUSE	Q64127	TIF1A_MOUSE	Trim24	Transcription intermediary factor 1-alpha	1.38593	0.470852	0.376504	0.627073
sp|P18406|CYR61_MOUSE	P18406	CYR61_MOUSE	Cyr61	Protein CYR61	1.38404	0.468881	0.377604	0.627073
sp|Q9D8E6|RL4_MOUSE	Q9D8E6	RL4_MOUSE	Rpl4	60S ribosomal protein L4	1.38225	0.467014	0.378647	0.627073
sp|Q9QWT9|KIFC1_MOUSE	Q9QWT9	KIFC1_MOUSE	Kifc1	Kinesin-like protein KIFC1	1.38038	0.46507	0.379733	0.627073
sp|Q8CI11|GNL3_MOUSE	Q8CI11	GNL3_MOUSE	Gnl3	Guanine nucleotide-binding protein-like 3	1.37923	0.46386	0.380409	0.627073
sp|Q6PDQ2|CHD4_MOUSE	Q6PDQ2	CHD4_MOUSE	Chd4	Chromodomain-helicase-DNA-binding protein 4	1.3763	0.460797	0.382119	0.627073
sp|Q8BJ03|COX15_MOUSE	Q8BJ03	COX15_MOUSE	Cox15	Cytochrome c oxidase assembly protein COX15 homolog	1.376	0.460479	0.382298	0.627073
sp|Q91WG4|ELP2_MOUSE	Q91WG4	ELP2_MOUSE	Elp2	Elongator complex protein 2	1.37548	0.459933	0.382602	0.627073
sp|Q9CY58|PAIRB_MOUSE	Q9CY58	PAIRB_MOUSE	Serbp1	Plasminogen activator inhibitor 1 RNA-binding protein	1.37513	0.459568	0.382806	0.627073
sp|P61965|WDR5_MOUSE	P61965	WDR5_MOUSE	Wdr5	WD repeat-containing protein 5	1.37479	0.459216	0.383003	0.627073
sp|Q8R3N6|THOC1_MOUSE	Q8R3N6	THOC1_MOUSE	Thoc1	THO complex subunit 1	1.37354	0.457897	0.383739	0.627073
sp|P35601|RFC1_MOUSE	P35601	RFC1_MOUSE	Rfc1	Replication factor C subunit 1	1.37294	0.457264	0.384093	0.627073
sp|A2RSY6|TRM1L_MOUSE	A2RSY6	TRM1L_MOUSE	Trmt1l	TRMT1-like protein	1.37274	0.457063	0.384205	0.627073
sp|Q9QXK7|CPSF3_MOUSE	Q9QXK7	CPSF3_MOUSE	Cpsf3	Cleavage and polyadenylation specificity factor subunit 3	1.37248	0.456781	0.384363	0.627073
tr|D3YWS8|D3YWS8_MOUSE	D3YWS8	D3YWS8_MOUSE	Leng8	Leukocyte receptor cluster (LRC) member 8, isoform CRA_a	1.37142	0.455674	0.384981	0.627073
sp|Q3TJD7|PDLI7_MOUSE	Q3TJD7	PDLI7_MOUSE	Pdlim7	PDZ and LIM domain protein 7	1.37005	0.454229	0.385788	0.627073
sp|Q8VEJ4|NLE1_MOUSE	Q8VEJ4	NLE1_MOUSE	Nle1	Notchless protein homolog 1	1.36998	0.454157	0.385828	0.627073
sp|Q99LH1|NOG2_MOUSE	Q99LH1	NOG2_MOUSE	Gnl2	Nucleolar GTP-binding protein 2	1.3693	0.453435	0.386231	0.627073
sp|Q62193|RFA2_MOUSE	Q62193	RFA2_MOUSE	Rpa2	Replication protein A 32 kDa subunit	1.36839	0.452478	0.386766	0.627073
sp|Q99PV0|PRP8_MOUSE	Q99PV0	PRP8_MOUSE	Prpf8	Pre-mRNA-processing-splicing factor 8	1.36668	0.450678	0.387771	0.627073
sp|Q7TPV4|MBB1A_MOUSE	Q7TPV4	MBB1A_MOUSE	Mybbp1a	Myb-binding protein 1A	1.36608	0.450039	0.388128	0.627073
sp|Q9JIK5|DDX21_MOUSE	Q9JIK5	DDX21_MOUSE	Ddx21	Nucleolar RNA helicase 2	1.36545	0.449381	0.388495	0.627073
sp|O88874|CCNK_MOUSE	O88874	CCNK_MOUSE	Ccnk	Cyclin-K	1.36542	0.449347	0.388514	0.627073
tr|E9Q9V7|E9Q9V7_MOUSE	E9Q9V7	E9Q9V7_MOUSE	Srcap	Protein Srcap	1.36515	0.449062	0.388673	0.627073
sp|Q922M5|CDA7L_MOUSE	Q922M5	CDA7L_MOUSE	Cdca7l	Cell division cycle-associated 7-like protein	1.36444	0.448312	0.389092	0.627073
sp|Q9JJT0|RCL1_MOUSE	Q9JJT0	RCL1_MOUSE	Rcl1	RNA 3'-terminal phosphate cyclase-like protein	1.36103	0.444695	0.391111	0.627073
sp|O88322|NID2_MOUSE	O88322	NID2_MOUSE	Nid2	Nidogen-2	1.36075	0.444404	0.391273	0.627073
tr|Q6NZQ2|Q6NZQ2_MOUSE	Q6NZQ2	Q6NZQ2_MOUSE	Ddx31	DEAD/H (Asp-Glu-Ala-Asp/His) box polypeptide 31	1.3594	0.44297	0.392074	0.627073
sp|P46978|STT3A_MOUSE	P46978	STT3A_MOUSE	Stt3a	Dolichyl-diphosphooligosaccharide--protein glycosyltransferase subunit STT3A	1.35849	0.442008	0.39261	0.627073
sp|Q925J9|MED1_MOUSE	Q925J9	MED1_MOUSE	Med1	Mediator of RNA polymerase II transcription subunit 1	1.35826	0.441762	0.392748	0.627073
sp|Q8BX10|PGAM5_MOUSE	Q8BX10	PGAM5_MOUSE	Pgam5	Serine/threonine-protein phosphatase PGAM5, mitochondrial	1.3552	0.438501	0.394567	0.627073
sp|Q8BG81|PDIP3_MOUSE	Q8BG81	PDIP3_MOUSE	Poldip3	Polymerase delta-interacting protein 3	1.35514	0.438444	0.394599	0.627073
sp|Q9EQ61|PESC_MOUSE	Q9EQ61	PESC_MOUSE	Pes1	Pescadillo homolog	1.35481	0.438096	0.394793	0.627073
sp|Q61466|SMRD1_MOUSE	Q61466	SMRD1_MOUSE	Smarcd1	SWI/SNF-related matrix-associated actin-dependent regulator of chromatin subfamily D member 1	1.35269	0.435836	0.396053	0.627073
sp|Q9CR11|YETS4_MOUSE	Q9CR11	YETS4_MOUSE	Yeats4	YEATS domain-containing protein 4	1.3503	0.433283	0.397476	0.627073
sp|Q7TSZ8|NACC1_MOUSE	Q7TSZ8	NACC1_MOUSE	Nacc1	Nucleus accumbens-associated protein 1	1.35006	0.433021	0.397622	0.627073
sp|Q9D0R4|DDX56_MOUSE	Q9D0R4	DDX56_MOUSE	Ddx56	Probable ATP-dependent RNA helicase DDX56	1.35003	0.432994	0.397637	0.627073
sp|Q9EP97|SENP3_MOUSE	Q9EP97	SENP3_MOUSE	Senp3	Sentrin-specific protease 3	1.34772	0.430517	0.399018	0.627073
sp|Q8VE92|RBM4B_MOUSE	Q8VE92	RBM4B_MOUSE	Rbm4b	RNA-binding protein 4B	1.34682	0.429561	0.39955	0.627073
tr|L7N1W9|L7N1W9_MOUSE	L7N1W9	L7N1W9_MOUSE	Nlrp4f	NACHT, LRR and PYD domains-containing protein 4F	1.34522	0.427844	0.400507	0.627073
sp|Q9R099|TBL2_MOUSE	Q9R099	TBL2_MOUSE	Tbl2	Transducin beta-like protein 2	1.34412	0.426658	0.401167	0.627073
sp|Q8BJW6|EIF2A_MOUSE	Q8BJW6	EIF2A_MOUSE	Eif2a	Eukaryotic translation initiation factor 2A	1.34411	0.426654	0.40117	0.627073
sp|Q8VEE4|RFA1_MOUSE	Q8VEE4	RFA1_MOUSE	Rpa1	Replication protein A 70 kDa DNA-binding subunit	1.34031	0.422568	0.403444	0.627073
sp|Q9WUN2|TBK1_MOUSE	Q9WUN2	TBK1_MOUSE	Tbk1	Serine/threonine-protein kinase TBK1	1.33769	0.419741	0.405017	0.627073
sp|Q8R1A4|DOCK7_MOUSE	Q8R1A4	DOCK7_MOUSE	Dock7	Dedicator of cytokinesis protein 7	1.33691	0.418898	0.405486	0.627073
sp|Q9DAW6|PRP4_MOUSE	Q9DAW6	PRP4_MOUSE	Prpf4	U4/U6 small nuclear ribonucleoprotein Prp4	1.33661	0.418575	0.405665	0.627073
tr|A2ANY6|A2ANY6_MOUSE	A2ANY6	A2ANY6_MOUSE	Mdn1	Midasin	1.33652	0.418482	0.405717	0.627073
sp|Q9D0L8|MCES_MOUSE	Q9D0L8	MCES_MOUSE	Rnmt	mRNA cap guanine-N7 methyltransferase	1.33584	0.417745	0.406126	0.627073
sp|Q9WVG6|CARM1_MOUSE	Q9WVG6	CARM1_MOUSE	Carm1	Histone-arginine methyltransferase CARM1	1.33443	0.416225	0.406971	0.627073
sp|Q9EP72|EMC7_MOUSE	Q9EP72	EMC7_MOUSE	Emc7	ER membrane protein complex subunit 7	1.33337	0.415077	0.407609	0.627073
sp|Q99JF8|PSIP1_MOUSE	Q99JF8	PSIP1_MOUSE	Psip1	PC4 and SFRS1-interacting protein	1.3325	0.414141	0.40813	0.627073
sp|P59110|SENP1_MOUSE	P59110	SENP1_MOUSE	Senp1	Sentrin-specific protease 1	1.33144	0.41299	0.408769	0.627073
sp|Q8R0G9|NU133_MOUSE	Q8R0G9	NU133_MOUSE	Nup133	Nuclear pore complex protein Nup133	1.33094	0.412449	0.409069	0.627073
sp|Q6ZQL4|WDR43_MOUSE	Q6ZQL4	WDR43_MOUSE	Wdr43	WD repeat-containing protein 43	1.3309	0.412407	0.409093	0.627073
sp|Q8K2X3|STN1_MOUSE	Q8K2X3	STN1_MOUSE	Obfc1	CST complex subunit STN1	1.33083	0.41233	0.409135	0.627073
tr|A2A7F4|A2A7F4_MOUSE	A2A7F4	A2A7F4_MOUSE	Rlf	Insulin-like 3	1.32977	0.411176	0.409776	0.627073
sp|Q91XU0|WRIP1_MOUSE	Q91XU0	WRIP1_MOUSE	Wrnip1	ATPase WRNIP1	1.32615	0.407248	0.411955	0.627073
sp|P63154|CRNL1_MOUSE	P63154	CRNL1_MOUSE	Crnkl1	Crooked neck-like protein 1	1.325	0.405995	0.41265	0.627073
sp|P48754|BRCA1_MOUSE	P48754	BRCA1_MOUSE	Brca1	Breast cancer type 1 susceptibility protein homolog	1.32357	0.404436	0.413514	0.627073
sp|Q3U1J4|DDB1_MOUSE	Q3U1J4	DDB1_MOUSE	Ddb1	DNA damage-binding protein 1	1.32169	0.402381	0.414653	0.627073
sp|Q80Y84|KDM5B_MOUSE	Q80Y84	KDM5B_MOUSE	Kdm5b	Lysine-specific demethylase 5B	1.32054	0.401132	0.415345	0.627073
sp|O70494|SP3_MOUSE	O70494	SP3_MOUSE	Sp3	Transcription factor Sp3	1.32054	0.401124	0.415349	0.627073
sp|Q922Q8|LRC59_MOUSE	Q922Q8	LRC59_MOUSE	Lrrc59	Leucine-rich repeat-containing protein 59	1.31979	0.400304	0.415803	0.627073
sp|Q78WZ7|RPA43_MOUSE	Q78WZ7	RPA43_MOUSE	Twistnb	DNA-directed RNA polymerase I subunit RPA43	1.31977	0.400288	0.415812	0.627073
sp|Q9CXV9|DCNL5_MOUSE	Q9CXV9	DCNL5_MOUSE	Dcun1d5	DCN1-like protein 5	1.31961	0.400113	0.415909	0.627073
sp|Q7TSY8|SGOL2_MOUSE	Q7TSY8	SGOL2_MOUSE	Sgol2	Shugoshin-like 2	1.31954	0.400037	0.415951	0.627073
sp|Q03147|CDK7_MOUSE	Q03147	CDK7_MOUSE	Cdk7	Cyclin-dependent kinase 7	1.31946	0.399951	0.415998	0.627073
sp|P33174|KIF4_MOUSE	P33174	KIF4_MOUSE	Kif4	Chromosome-associated kinesin KIF4	1.31933	0.399806	0.416079	0.627073
sp|Q8BH15|CNO10_MOUSE	Q8BH15	CNO10_MOUSE	Cnot10	CCR4-NOT transcription complex subunit 10	1.31897	0.399416	0.416294	0.627073
tr|L7N1Z0|L7N1Z0_MOUSE	L7N1Z0	L7N1Z0_MOUSE	Gm6871	Protein Gm6871	1.31766	0.397978	0.41709	0.627073
sp|Q8C570|RAE1L_MOUSE	Q8C570	RAE1L_MOUSE	Rae1	mRNA export factor	1.31724	0.397515	0.417346	0.627073
sp|Q5SS00|ZDBF2_MOUSE	Q5SS00	ZDBF2_MOUSE	Zdbf2	DBF4-type zinc finger-containing protein 2 homolog	1.31659	0.396804	0.417739	0.627073
sp|Q6IFX4|K1C39_MOUSE	Q6IFX4	K1C39_MOUSE	Krt39	Keratin, type I cytoskeletal 39	1.31633	0.396519	0.417897	0.627073
sp|Q924K8|MTA3_MOUSE	Q924K8	MTA3_MOUSE	Mta3	Metastasis-associated protein MTA3	1.31602	0.396178	0.418086	0.627073
tr|B2RXC6|B2RXC6_MOUSE	B2RXC6	B2RXC6_MOUSE	Polr3a	DNA-directed RNA polymerase	1.31434	0.394337	0.419103	0.627073
sp|P14733|LMNB1_MOUSE	P14733	LMNB1_MOUSE	Lmnb1	Lamin-B1	1.31388	0.393838	0.419379	0.627073
sp|P37889|FBLN2_MOUSE	P37889	FBLN2_MOUSE	Fbln2	Fibulin-2	1.31323	0.393125	0.419773	0.627073
sp|O89086|RBM3_MOUSE	O89086	RBM3_MOUSE	Rbm3	Putative RNA-binding protein 3	1.31314	0.393022	0.41983	0.627073
sp|Q6PCM1|KDM3A_MOUSE	Q6PCM1	KDM3A_MOUSE	Kdm3a	Lysine-specific demethylase 3A	1.31271	0.392549	0.420091	0.627073
sp|P47962|RL5_MOUSE	P47962	RL5_MOUSE	Rpl5	60S ribosomal protein L5	1.31253	0.392352	0.4202	0.627073
sp|P47754|CAZA2_MOUSE	P47754	CAZA2_MOUSE	Capza2	F-actin-capping protein subunit alpha-2	1.31247	0.392289	0.420234	0.627073
sp|Q8BHJ5|TBL1R_MOUSE	Q8BHJ5	TBL1R_MOUSE	Tbl1xr1	F-box-like/WD repeat-containing protein TBL1XR1	1.30851	0.387927	0.422641	0.627073
sp|P13864|DNMT1_MOUSE	P13864	DNMT1_MOUSE	Dnmt1	DNA (cytosine-5)-methyltransferase 1	1.30706	0.38633	0.423522	0.627073
sp|F6ZDS4|TPR_MOUSE	F6ZDS4	TPR_MOUSE	Tpr	Nucleoprotein TPR	1.30705	0.38631	0.423532	0.627073
sp|Q99J72|ABEC3_MOUSE	Q99J72	ABEC3_MOUSE	Apobec3	DNA dC->dU-editing enzyme APOBEC-3	1.30638	0.385579	0.423935	0.627073
sp|Q62073|M3K7_MOUSE	Q62073	M3K7_MOUSE	Map3k7	Mitogen-activated protein kinase kinase kinase 7	1.30312	0.381966	0.425924	0.627073
sp|Q6ZPR5|NSMA3_MOUSE	Q6ZPR5	NSMA3_MOUSE	Smpd4	Sphingomyelin phosphodiesterase 4	1.30305	0.381896	0.425963	0.627073
sp|Q91X20|ASH2L_MOUSE	Q91X20	ASH2L_MOUSE	Ash2l	Set1/Ash2 histone methyltransferase complex subunit ASH2	1.30239	0.381166	0.426364	0.627073
tr|E9Q5G3|E9Q5G3_MOUSE	E9Q5G3	E9Q5G3_MOUSE	Kif23	Kinesin-like protein KIF23	1.30183	0.380539	0.426709	0.627073
sp|Q8CCF0|PRP31_MOUSE	Q8CCF0	PRP31_MOUSE	Prpf31	U4/U6 small nuclear ribonucleoprotein Prp31	1.30154	0.380217	0.426886	0.627073
sp|Q04692|SMRCD_MOUSE	Q04692	SMRCD_MOUSE	Smarcad1	SWI/SNF-related matrix-associated actin-dependent regulator of chromatin subfamily A containing DEAD/H box 1	1.29927	0.377704	0.428267	0.627073
sp|Q8BW72|KDM4A_MOUSE	Q8BW72	KDM4A_MOUSE	Kdm4a	Lysine-specific demethylase 4A	1.29898	0.377377	0.428446	0.627073
sp|P58022|LOXL2_MOUSE	P58022	LOXL2_MOUSE	Loxl2	Lysyl oxidase homolog 2	1.29888	0.377264	0.428509	0.627073
sp|Q9CQL1|MGN2_MOUSE	Q9CQL1	MGN2_MOUSE	Magohb	Protein mago nashi homolog 2	1.29606	0.374132	0.430228	0.627073
sp|Q4VA53|PDS5B_MOUSE	Q4VA53	PDS5B_MOUSE	Pds5b	Sister chromatid cohesion protein PDS5 homolog B	1.29568	0.373708	0.43046	0.627073
sp|O08715|AKAP1_MOUSE	O08715	AKAP1_MOUSE	Akap1	A-kinase anchor protein 1, mitochondrial	1.29489	0.37283	0.430942	0.627073
sp|Q61164|CTCF_MOUSE	Q61164	CTCF_MOUSE	Ctcf	Transcriptional repressor CTCF	1.2944	0.372278	0.431244	0.627073
sp|Q9CPP0|NPM3_MOUSE	Q9CPP0	NPM3_MOUSE	Npm3	Nucleoplasmin-3	1.28927	0.366553	0.434378	0.627073
sp|P52431|DPOD1_MOUSE	P52431	DPOD1_MOUSE	Pold1	DNA polymerase delta catalytic subunit	1.28786	0.364974	0.435241	0.627073
sp|Q9D666|SUN1_MOUSE	Q9D666	SUN1_MOUSE	Sun1	SUN domain-containing protein 1	1.28571	0.36256	0.436558	0.627073
sp|Q8BGS0|MAK16_MOUSE	Q8BGS0	MAK16_MOUSE	Mak16	Protein MAK16 homolog	1.28495	0.361711	0.437022	0.627073
sp|Q9CU65|ZMYM2_MOUSE	Q9CU65	ZMYM2_MOUSE	Zmym2	Zinc finger MYM-type protein 2	1.28404	0.360695	0.437575	0.627073
sp|P12970|RL7A_MOUSE	P12970	RL7A_MOUSE	Rpl7a	60S ribosomal protein L7a	1.28333	0.359895	0.438011	0.627073
sp|Q8BIX3|AL14E_MOUSE	Q8BIX3	AL14E_MOUSE	Arl14ep	ARL14 effector protein	1.28091	0.357169	0.439496	0.627073
sp|B2RRE7|OTUD4_MOUSE	B2RRE7	OTUD4_MOUSE	Otud4	OTU domain-containing protein 4	1.27957	0.355654	0.44032	0.627073
tr|Q921K2|Q921K2_MOUSE	Q921K2	Q921K2_MOUSE	Parp1	Poly (ADP-ribose) polymerase family, member 1	1.2795	0.355576	0.440362	0.627073
sp|Q569Z5|DDX46_MOUSE	Q569Z5	DDX46_MOUSE	Ddx46	Probable ATP-dependent RNA helicase DDX46	1.27894	0.354946	0.440705	0.627073
sp|Q6PGG6|GNL3L_MOUSE	Q6PGG6	GNL3L_MOUSE	Gnl3l	Guanine nucleotide-binding protein-like 3-like protein	1.27857	0.354526	0.440933	0.627073
sp|Q8R3N1|NOP14_MOUSE	Q8R3N1	NOP14_MOUSE	Nop14	Nucleolar protein 14	1.27791	0.353783	0.441337	0.627073
sp|Q9WUM4|COR1C_MOUSE	Q9WUM4	COR1C_MOUSE	Coro1c	Coronin-1C	1.2755	0.351061	0.442815	0.627073
sp|Q9ESU6|BRD4_MOUSE	Q9ESU6	BRD4_MOUSE	Brd4	Bromodomain-containing protein 4	1.27531	0.350853	0.442927	0.627073
sp|Q9D4J7|PHF6_MOUSE	Q9D4J7	PHF6_MOUSE	Phf6	PHD finger protein 6	1.27471	0.350169	0.443298	0.627073
tr|A2AUY4|A2AUY4_MOUSE	A2AUY4	A2AUY4_MOUSE	Baz2b	Protein Baz2b	1.2747	0.350161	0.443303	0.627073
sp|P42208|SEPT2_MOUSE	P42208	SEPT2_MOUSE	42249	Septin-2	1.27468	0.350135	0.443317	0.627073
sp|Q8BRB7|KAT6B_MOUSE	Q8BRB7	KAT6B_MOUSE	Kat6b	Histone acetyltransferase KAT6B	1.27112	0.346099	0.445503	0.627073
sp|Q00422|GABPA_MOUSE	Q00422	GABPA_MOUSE	Gabpa	GA-binding protein alpha chain	1.2708	0.345742	0.445696	0.627073
sp|P59178|LMBL2_MOUSE	P59178	LMBL2_MOUSE	L3mbtl2	Lethal(3)malignant brain tumor-like protein 2	1.27065	0.34557	0.445789	0.627073
sp|Q8BX22|SALL4_MOUSE	Q8BX22	SALL4_MOUSE	Sall4	Sal-like protein 4	1.26837	0.342975	0.447191	0.627073
sp|Q9Z0N1|IF2G_MOUSE	Q9Z0N1	IF2G_MOUSE	Eif2s3x	Eukaryotic translation initiation factor 2 subunit 3, X-linked	1.26802	0.34258	0.447405	0.627073
sp|P59328|WDHD1_MOUSE	P59328	WDHD1_MOUSE	Wdhd1	WD repeat and HMG-box DNA-binding protein 1	1.26726	0.34171	0.447874	0.627073
sp|Q3TEA8|HP1B3_MOUSE	Q3TEA8	HP1B3_MOUSE	Hp1bp3	Heterochromatin protein 1-binding protein 3	1.26642	0.340761	0.448386	0.627073
tr|Q3U1M7|Q3U1M7_MOUSE	Q3U1M7	Q3U1M7_MOUSE	Zmynd8	Protein Zmynd8	1.26606	0.340344	0.448611	0.627073
sp|P48962|ADT1_MOUSE	P48962	ADT1_MOUSE	Slc25a4	ADP/ATP translocase 1	1.26334	0.337237	0.450285	0.627073
sp|Q8BHS3|RBM22_MOUSE	Q8BHS3	RBM22_MOUSE	Rbm22	Pre-mRNA-splicing factor RBM22	1.2609	0.334458	0.451779	0.627073
sp|Q9CY57|CHTOP_MOUSE	Q9CY57	CHTOP_MOUSE	Chtop	Chromatin target of PRMT1 protein	1.25944	0.332781	0.45268	0.627073
sp|Q9DCD2|SYF1_MOUSE	Q9DCD2	SYF1_MOUSE	Xab2	Pre-mRNA-splicing factor SYF1	1.2593	0.332621	0.452765	0.627073
sp|Q9CWZ3|RBM8A_MOUSE	Q9CWZ3	RBM8A_MOUSE	Rbm8a	RNA-binding protein 8A	1.25861	0.33183	0.45319	0.627073
sp|Q6PCN7|HLTF_MOUSE	Q6PCN7	HLTF_MOUSE	Hltf	Helicase-like transcription factor	1.25856	0.331774	0.45322	0.627073
sp|Q3TLH4|PRC2C_MOUSE	Q3TLH4	PRC2C_MOUSE	Prrc2c	Protein PRRC2C	1.2569	0.329875	0.454238	0.627073
sp|Q99MX1|UBP26_MOUSE	Q99MX1	UBP26_MOUSE	Usp26	Ubiquitin carboxyl-terminal hydrolase 26	1.2558	0.328606	0.454917	0.627073
sp|Q9WTX8|MD1L1_MOUSE	Q9WTX8	MD1L1_MOUSE	Mad1l1	Mitotic spindle assembly checkpoint protein MAD1	1.25496	0.32764	0.455434	0.627073
sp|P10493|NID1_MOUSE	P10493	NID1_MOUSE	Nid1	Nidogen-1	1.25488	0.327554	0.455481	0.627073
sp|Q61033|LAP2A_MOUSE	Q61033	LAP2A_MOUSE	Tmpo	Lamina-associated polypeptide 2, isoforms alpha/zeta	1.25233	0.32461	0.457053	0.627073
sp|O89112|LANC1_MOUSE	O89112	LANC1_MOUSE	Lancl1	LanC-like protein 1	1.2506	0.322625	0.458113	0.627073
sp|Q9DBE9|SPB1_MOUSE	Q9DBE9	SPB1_MOUSE	Ftsj3	pre-rRNA processing protein FTSJ3	1.24966	0.321537	0.458693	0.627073
sp|Q9D0W5|PPIL1_MOUSE	Q9D0W5	PPIL1_MOUSE	Ppil1	Peptidyl-prolyl cis-trans isomerase-like 1	1.24936	0.321188	0.458878	0.627073
sp|Q9CWR8|DNM3L_MOUSE	Q9CWR8	DNM3L_MOUSE	Dnmt3l	DNA (cytosine-5)-methyltransferase 3-like	1.24786	0.319454	0.459801	0.627073
sp|Q6PAV2|HERC4_MOUSE	Q6PAV2	HERC4_MOUSE	Herc4	Probable E3 ubiquitin-protein ligase HERC4	1.24662	0.31802	0.460563	0.627073
sp|O88445|AURKC_MOUSE	O88445	AURKC_MOUSE	Aurkc	Aurora kinase C	1.24521	0.316385	0.461432	0.627073
sp|P62137|PP1A_MOUSE	P62137	PP1A_MOUSE	Ppp1ca	Serine/threonine-protein phosphatase PP1-alpha catalytic subunit	1.2451	0.316267	0.461495	0.627073
sp|P33611|DPOA2_MOUSE	P33611	DPOA2_MOUSE	Pola2	DNA polymerase alpha subunit B	1.242	0.312667	0.463402	0.627073
sp|O70546|KDM6A_MOUSE	O70546	KDM6A_MOUSE	Kdm6a	Lysine-specific demethylase 6A	1.24199	0.312656	0.463408	0.627073
sp|Q8VBU8|BANP_MOUSE	Q8VBU8	BANP_MOUSE	Banp	Protein BANP	1.24157	0.312165	0.463668	0.627073
sp|Q9JIF0|ANM1_MOUSE	Q9JIF0	ANM1_MOUSE	Prmt1	Protein arginine N-methyltransferase 1	1.24087	0.311353	0.464098	0.627073
sp|Q9WUU9|GANP_MOUSE	Q9WUU9	GANP_MOUSE	Mcm3ap	Germinal-center associated nuclear protein	1.23974	0.31004	0.464791	0.627073
sp|Q60862|ORC2_MOUSE	Q60862	ORC2_MOUSE	Orc2	Origin recognition complex subunit 2	1.23809	0.308122	0.465804	0.627073
sp|Q6ZWX6|IF2A_MOUSE	Q6ZWX6	IF2A_MOUSE	Eif2s1	Eukaryotic translation initiation factor 2 subunit 1	1.23435	0.303755	0.468104	0.627073
sp|O70194|EIF3D_MOUSE	O70194	EIF3D_MOUSE	Eif3d	Eukaryotic translation initiation factor 3 subunit D	1.23322	0.302432	0.468799	0.627073
sp|Q99J62|RFC4_MOUSE	Q99J62	RFC4_MOUSE	Rfc4	Replication factor C subunit 4	1.2317	0.300649	0.469735	0.627073
sp|P84099|RL19_MOUSE	P84099	RL19_MOUSE	Rpl19	60S ribosomal protein L19	1.22944	0.297997	0.471124	0.627073
sp|Q6P542|ABCF1_MOUSE	Q6P542	ABCF1_MOUSE	Abcf1	ATP-binding cassette sub-family F member 1	1.22786	0.296143	0.472093	0.627073
sp|Q08943|SSRP1_MOUSE	Q08943	SSRP1_MOUSE	Ssrp1	FACT complex subunit SSRP1	1.22782	0.296104	0.472114	0.627073
sp|Q8VDP4|CCAR2_MOUSE	Q8VDP4	CCAR2_MOUSE	Ccar2	Cell cycle and apoptosis regulator protein 2	1.22756	0.295789	0.472278	0.627073
sp|Q9D8C3|ALG13_MOUSE	Q9D8C3	ALG13_MOUSE	Alg13	Putative bifunctional UDP-N-acetylglucosamine transferase and deubiquitinase ALG13	1.22671	0.294795	0.472797	0.627073
sp|Q8BIH0|SP130_MOUSE	Q8BIH0	SP130_MOUSE	Sap130	Histone deacetylase complex subunit SAP130	1.22664	0.294712	0.47284	0.627073
sp|Q61102|ABCB7_MOUSE	Q61102	ABCB7_MOUSE	Abcb7	ATP-binding cassette sub-family B member 7, mitochondrial	1.2255	0.293367	0.473542	0.627073
tr|E9Q1Z0|E9Q1Z0_MOUSE	E9Q1Z0	E9Q1Z0_MOUSE	4732456N10Rik	Protein 4732456N10Rik	1.22349	0.291001	0.474773	0.627073
tr|A2AT37|A2AT37_MOUSE	A2AT37	A2AT37_MOUSE	Upf2	Protein Upf2	1.22233	0.28963	0.475486	0.627073
sp|Q9D753|EXOS8_MOUSE	Q9D753	EXOS8_MOUSE	Exosc8	Exosome complex component RRP43	1.22195	0.289181	0.475719	0.627073
tr|G3X922|G3X922_MOUSE	G3X922	G3X922_MOUSE	Dnajc13	MCG115602	1.22159	0.288764	0.475936	0.627073
sp|Q9Z1Q9|SYVC_MOUSE	Q9Z1Q9	SYVC_MOUSE	Vars	Valine--tRNA ligase	1.2212	0.288298	0.476178	0.627073
sp|P52293|IMA1_MOUSE	P52293	IMA1_MOUSE	Kpna2	Importin subunit alpha-1	1.22054	0.287516	0.476583	0.627073
sp|Q99NA9|PCGF6_MOUSE	Q99NA9	PCGF6_MOUSE	Pcgf6	Polycomb group RING finger protein 6	1.22041	0.287365	0.476662	0.627073
sp|Q80U78|PUM1_MOUSE	Q80U78	PUM1_MOUSE	Pum1	Pumilio homolog 1	1.21934	0.286103	0.477315	0.627073
sp|P56546|CTBP2_MOUSE	P56546	CTBP2_MOUSE	Ctbp2	C-terminal-binding protein 2	1.21817	0.284716	0.478033	0.627073
sp|Q61846|MELK_MOUSE	Q61846	MELK_MOUSE	Melk	Maternal embryonic leucine zipper kinase	1.21757	0.283999	0.478404	0.627073
sp|Q80X72|LRC15_MOUSE	Q80X72	LRC15_MOUSE	Lrrc15	Leucine-rich repeat-containing protein 15	1.21602	0.282168	0.479349	0.627073
sp|Q6PE01|SNR40_MOUSE	Q6PE01	SNR40_MOUSE	Snrnp40	U5 small nuclear ribonucleoprotein 40 kDa protein	1.21593	0.282059	0.479406	0.627073
sp|P83882|RL36A_MOUSE	P83882	RL36A_MOUSE	Rpl36a	60S ribosomal protein L36a	1.21585	0.281969	0.479452	0.627073
sp|Q8BZR9|CQ085_MOUSE	Q8BZR9	CQ085_MOUSE	Ncbp3	Uncharacterized protein C17orf85 homolog	1.21552	0.281573	0.479656	0.627073
sp|P62754|RS6_MOUSE	P62754	RS6_MOUSE	Rps6	40S ribosomal protein S6	1.21519	0.281184	0.479857	0.627073
sp|Q8BGC0|HTSF1_MOUSE	Q8BGC0	HTSF1_MOUSE	Htatsf1	HIV Tat-specific factor 1 homolog	1.21422	0.280026	0.480454	0.627073
sp|Q91VR5|DDX1_MOUSE	Q91VR5	DDX1_MOUSE	Ddx1	ATP-dependent RNA helicase DDX1	1.21203	0.27742	0.481794	0.627073
sp|Q6A4J8|UBP7_MOUSE	Q6A4J8	UBP7_MOUSE	Usp7	Ubiquitin carboxyl-terminal hydrolase 7	1.20989	0.27488	0.483097	0.627073
sp|Q8R5K4|NOL6_MOUSE	Q8R5K4	NOL6_MOUSE	Nol6	Nucleolar protein 6	1.20912	0.273963	0.483567	0.627073
sp|Q9D0N7|CAF1B_MOUSE	Q9D0N7	CAF1B_MOUSE	Chaf1b	Chromatin assembly factor 1 subunit B	1.2082	0.27286	0.484131	0.627073
sp|Q60848|HELLS_MOUSE	Q60848	HELLS_MOUSE	Hells	Lymphocyte-specific helicase	1.20657	0.27091	0.485127	0.627073
sp|Q60953|PML_MOUSE	Q60953	PML_MOUSE	Pml	Protein PML	1.20583	0.270031	0.485576	0.627073
sp|Q920L1|FADS1_MOUSE	Q920L1	FADS1_MOUSE	Fads1	Fatty acid desaturase 1	1.20551	0.269648	0.485771	0.627073
sp|Q91XU3|PI42C_MOUSE	Q91XU3	PI42C_MOUSE	Pip4k2c	Phosphatidylinositol 5-phosphate 4-kinase type-2 gamma	1.20525	0.269333	0.485932	0.627073
sp|P54276|MSH6_MOUSE	P54276	MSH6_MOUSE	Msh6	DNA mismatch repair protein Msh6	1.20503	0.269066	0.486068	0.627073
sp|Q9EQW8|NDST4_MOUSE	Q9EQW8	NDST4_MOUSE	Ndst4	Bifunctional heparan sulfate N-deacetylase/N-sulfotransferase 4	1.2021	0.265558	0.487852	0.627073
sp|Q64514|TPP2_MOUSE	Q64514	TPP2_MOUSE	Tpp2	Tripeptidyl-peptidase 2	1.20109	0.264342	0.488469	0.627073
sp|Q9QYA2|TOM40_MOUSE	Q9QYA2	TOM40_MOUSE	Tomm40	Mitochondrial import receptor subunit TOM40 homolog	1.20094	0.26417	0.488557	0.627073
sp|P35441|TSP1_MOUSE	P35441	TSP1_MOUSE	Thbs1	Thrombospondin-1	1.20028	0.263369	0.488962	0.627073
sp|O70325|GPX41_MOUSE	O70325	GPX41_MOUSE	Gpx4	Phospholipid hydroperoxide glutathione peroxidase, mitochondrial	1.19857	0.261315	0.490001	0.627073
sp|Q8K268|ABCF3_MOUSE	Q8K268	ABCF3_MOUSE	Abcf3	ATP-binding cassette sub-family F member 3	1.19798	0.2606	0.490363	0.627073
sp|O70230|ZN143_MOUSE	O70230	ZN143_MOUSE	Znf143	Zinc finger protein 143	1.19796	0.260581	0.490372	0.627073
sp|Q8BMB0|EMSY_MOUSE	Q8BMB0	EMSY_MOUSE	Emsy	Protein EMSY	1.19669	0.259048	0.491146	0.627073
sp|O70126|AURKB_MOUSE	O70126	AURKB_MOUSE	Aurkb	Aurora kinase B	1.19561	0.257745	0.491803	0.627073
sp|P48377|RFX1_MOUSE	P48377	RFX1_MOUSE	Rfx1	MHC class II regulatory factor RFX1	1.19511	0.257145	0.492105	0.627073
sp|P13020-2|GELS_MOUSE	P13020-2	GELS_MOUSE	Gsn	Isoform 2 of Gelsolin	1.19499	0.257003	0.492176	0.627073
tr|G3X9Z4|G3X9Z4_MOUSE	G3X9Z4	G3X9Z4_MOUSE	Pcf11	Cleavage and polyadenylation factor subunit homolog (S. cerevisiae)	1.19455	0.256465	0.492447	0.627073
sp|P21995|EMB_MOUSE	P21995	EMB_MOUSE	Emb	Embigin	1.19387	0.255641	0.492861	0.627073
sp|Q60973|RBBP7_MOUSE	Q60973	RBBP7_MOUSE	Rbbp7	Histone-binding protein RBBP7	1.19336	0.255034	0.493165	0.627073
sp|Q8VE80|THOC3_MOUSE	Q8VE80	THOC3_MOUSE	Thoc3	THO complex subunit 3	1.19178	0.253122	0.494124	0.627073
sp|P17426|AP2A1_MOUSE	P17426	AP2A1_MOUSE	Ap2a1	AP-2 complex subunit alpha-1	1.19092	0.252082	0.494645	0.627073
sp|P35922|FMR1_MOUSE	P35922	FMR1_MOUSE	Fmr1	Fragile X mental retardation protein 1 homolog	1.19069	0.251802	0.494785	0.627073
sp|P11983|TCPA_MOUSE	P11983	TCPA_MOUSE	Tcp1	T-complex protein 1 subunit alpha	1.18994	0.250891	0.495241	0.627073
sp|P62245|RS15A_MOUSE	P62245	RS15A_MOUSE	Rps15a	40S ribosomal protein S15a	1.18982	0.250739	0.495317	0.627073
sp|Q8BMQ2|TF3C4_MOUSE	Q8BMQ2	TF3C4_MOUSE	Gtf3c4	General transcription factor 3C polypeptide 4	1.18972	0.250624	0.495374	0.627073
sp|Q8K385|FRRS1_MOUSE	Q8K385	FRRS1_MOUSE	FRRS1	Ferric-chelate reductase 1	1.18887	0.24959	0.49589	0.627073
sp|Q7TT18|MCAF1_MOUSE	Q7TT18	MCAF1_MOUSE	Atf7ip	Activating transcription factor 7-interacting protein 1	1.18885	0.249572	0.495899	0.627073
sp|Q91VC9|GHITM_MOUSE	Q91VC9	GHITM_MOUSE	Ghitm	Growth hormone-inducible transmembrane protein	1.18814	0.248702	0.496333	0.627073
sp|Q922H2|PDK3_MOUSE	Q922H2	PDK3_MOUSE	Pdk3	[Pyruvate dehydrogenase (acetyl-transferring)] kinase isozyme 3, mitochondrial	1.18718	0.247543	0.49691	0.627073
sp|Q8K284|TF3C1_MOUSE	Q8K284	TF3C1_MOUSE	Gtf3c1	General transcription factor 3C polypeptide 1	1.18707	0.247408	0.496978	0.627073
tr|A2AWT5|A2AWT5_MOUSE	A2AWT5	A2AWT5_MOUSE	Ubtf	Nucleolar transcription factor 1	1.18681	0.247094	0.497134	0.627073
sp|Q6A0A9|F120A_MOUSE	Q6A0A9	F120A_MOUSE	FAM120A	Constitutive coactivator of PPAR-gamma-like protein 1	1.18601	0.246115	0.497621	0.627073
sp|Q61191|HCFC1_MOUSE	Q61191	HCFC1_MOUSE	Hcfc1	Host cell factor 1	1.18469	0.244504	0.49842	0.627073
sp|Q6DFV5|HELZ_MOUSE	Q6DFV5	HELZ_MOUSE	Helz	Probable helicase with zinc finger domain	1.18374	0.243347	0.498994	0.627073
sp|P55200|KMT2A_MOUSE	P55200	KMT2A_MOUSE	Kmt2a	Histone-lysine N-methyltransferase 2A	1.18344	0.24299	0.499171	0.627073
tr|Q6IQX8|Q6IQX8_MOUSE	Q6IQX8	Q6IQX8_MOUSE	Zfp219	Protein Zfp219	1.18278	0.242188	0.499568	0.627073
tr|E9Q7E2|E9Q7E2_MOUSE	E9Q7E2	E9Q7E2_MOUSE	Arid2	Protein Arid2	1.18253	0.241879	0.499721	0.627073
sp|O09167|RL21_MOUSE	O09167	RL21_MOUSE	Rpl21	60S ribosomal protein L21	1.18037	0.239244	0.501022	0.627073
sp|A2AKX3|SETX_MOUSE	A2AKX3	SETX_MOUSE	Setx	Probable helicase senataxin	1.1802	0.239031	0.501127	0.627073
sp|Q8VDW0|DX39A_MOUSE	Q8VDW0	DX39A_MOUSE	Ddx39a	ATP-dependent RNA helicase DDX39A	1.17571	0.233528	0.50383	0.627073
sp|P59470|RPC2_MOUSE	P59470	RPC2_MOUSE	Polr3b	DNA-directed RNA polymerase III subunit RPC2	1.17409	0.231546	0.504799	0.627073
sp|Q3UKJ7|SMU1_MOUSE	Q3UKJ7	SMU1_MOUSE	Smu1	WD40 repeat-containing protein SMU1	1.17229	0.22933	0.505879	0.627073
sp|Q6NWW9|FND3B_MOUSE	Q6NWW9	FND3B_MOUSE	Fndc3b	Fibronectin type III domain-containing protein 3B	1.17138	0.228212	0.506423	0.627073
sp|Q9CPS7|PNO1_MOUSE	Q9CPS7	PNO1_MOUSE	Pno1	RNA-binding protein PNO1	1.17106	0.227818	0.506614	0.627073
sp|Q922H1|ANM3_MOUSE	Q922H1	ANM3_MOUSE	Prmt3	Protein arginine N-methyltransferase 3	1.17104	0.227786	0.50663	0.627073
sp|Q99LF4|RTCB_MOUSE	Q99LF4	RTCB_MOUSE	Rtcb	tRNA-splicing ligase RtcB homolog	1.17029	0.226863	0.507078	0.627073
sp|Q61550|RAD21_MOUSE	Q61550	RAD21_MOUSE	Rad21	Double-strand-break repair protein rad21 homolog	1.16959	0.226	0.507497	0.627073
tr|A6ZI44|A6ZI44_MOUSE	A6ZI44	A6ZI44_MOUSE	Aldoa	Aldolase A splice variant 2	1.16738	0.223275	0.508816	0.627073
sp|Q99LI5|ZN281_MOUSE	Q99LI5	ZN281_MOUSE	Znf281	Zinc finger protein 281	1.16643	0.222103	0.509381	0.627073
sp|Q05920|PYC_MOUSE	Q05920	PYC_MOUSE	Pc	Pyruvate carboxylase, mitochondrial	1.16565	0.22114	0.509846	0.627073
sp|P86048|RL10L_MOUSE	P86048	RL10L_MOUSE	Rpl10l	60S ribosomal protein L10-like	1.16428	0.219437	0.510665	0.627073
sp|Q9CQ62|DECR_MOUSE	Q9CQ62	DECR_MOUSE	Decr1	2,4-dienoyl-CoA reductase, mitochondrial	1.16411	0.219222	0.510768	0.627073
sp|Q91VE0|S27A4_MOUSE	Q91VE0	S27A4_MOUSE	Slc27a4	Long-chain fatty acid transport protein 4	1.16274	0.217525	0.511583	0.627073
sp|Q6ZQ29|TAOK2_MOUSE	Q6ZQ29	TAOK2_MOUSE	Taok2	Serine/threonine-protein kinase TAO2	1.16239	0.2171	0.511786	0.627073
sp|Q07235|GDN_MOUSE	Q07235	GDN_MOUSE	Serpine2	Glia-derived nexin	1.16183	0.216405	0.512119	0.627073
sp|Q8BMJ3|IF1AX_MOUSE	Q8BMJ3	IF1AX_MOUSE	Eif1ax	Eukaryotic translation initiation factor 1A, X-chromosomal	1.16157	0.216078	0.512276	0.627073
sp|P16381|DDX3L_MOUSE	P16381	DDX3L_MOUSE	D1Pas1	Putative ATP-dependent RNA helicase Pl10	1.16108	0.215469	0.512567	0.627073
sp|Q9D1M0|SEC13_MOUSE	Q9D1M0	SEC13_MOUSE	Sec13	Protein SEC13 homolog	1.16104	0.215413	0.512594	0.627073
sp|Q8BU04|UBR7_MOUSE	Q8BU04	UBR7_MOUSE	Ubr7	Putative E3 ubiquitin-protein ligase UBR7	1.16095	0.215312	0.512642	0.627073
sp|Q9D0B6|PBDC1_MOUSE	Q9D0B6	PBDC1_MOUSE	Pbdc1	Protein PBDC1	1.15968	0.213726	0.513399	0.627073
sp|O35344|IMA4_MOUSE	O35344	IMA4_MOUSE	Kpna3	Importin subunit alpha-4	1.15813	0.2118	0.514316	0.627073
sp|O08582|GTPB1_MOUSE	O08582	GTPB1_MOUSE	Gtpbp1	GTP-binding protein 1	1.15741	0.2109	0.514744	0.627073
sp|B2RRE4|Z518B_MOUSE	B2RRE4	Z518B_MOUSE	Znf518b	Zinc finger protein 518B	1.1561	0.209267	0.515519	0.627073
sp|Q9D0R8|LSM12_MOUSE	Q9D0R8	LSM12_MOUSE	Lsm12	Protein LSM12 homolog	1.15556	0.208591	0.515839	0.627073
sp|Q5NC05|TTF2_MOUSE	Q5NC05	TTF2_MOUSE	Ttf2	Transcription termination factor 2	1.15479	0.20763	0.516293	0.627073
sp|Q0VGM9|RTEL1_MOUSE	Q0VGM9	RTEL1_MOUSE	Rtel1	Regulator of telomere elongation helicase 1	1.15404	0.206695	0.516735	0.627073
sp|P33609|DPOLA_MOUSE	P33609	DPOLA_MOUSE	Pola1	DNA polymerase alpha catalytic subunit	1.15385	0.206452	0.51685	0.627073
sp|Q02614|S30BP_MOUSE	Q02614	S30BP_MOUSE	Sap30bp	SAP30-binding protein	1.15378	0.206368	0.51689	0.627073
sp|Q91WD5|NDUS2_MOUSE	Q91WD5	NDUS2_MOUSE	Ndufs2	NADH dehydrogenase [ubiquinone] iron-sulfur protein 2, mitochondrial	1.15337	0.205859	0.51713	0.627073
sp|Q9ERE2|KRT81_MOUSE	Q9ERE2	KRT81_MOUSE	Krt81	Keratin, type II cuticular Hb1	1.15324	0.205696	0.517207	0.627073
sp|P97310|MCM2_MOUSE	P97310	MCM2_MOUSE	Mcm2	DNA replication licensing factor MCM2	1.15283	0.205182	0.517449	0.627073
sp|P70227|ITPR3_MOUSE	P70227	ITPR3_MOUSE	Itpr3	Inositol 1,4,5-trisphosphate receptor type 3	1.15257	0.204858	0.517601	0.627073
sp|P62911|RL32_MOUSE	P62911	RL32_MOUSE	Rpl32	60S ribosomal protein L32	1.15244	0.204691	0.51768	0.627073
sp|Q8R016|BLMH_MOUSE	Q8R016	BLMH_MOUSE	Blmh	Bleomycin hydrolase	1.1498	0.201385	0.519233	0.627073
sp|Q62504|MINT_MOUSE	Q62504	MINT_MOUSE	Spen	Msx2-interacting protein	1.14876	0.200071	0.519847	0.627073
sp|P35700|PRDX1_MOUSE	P35700	PRDX1_MOUSE	Prdx1	Peroxiredoxin-1	1.14873	0.200036	0.519864	0.627073
sp|Q3U9G9|LBR_MOUSE	Q3U9G9	LBR_MOUSE	Lbr	Lamin-B receptor	1.14814	0.199298	0.520209	0.627073
sp|Q8VH51|RBM39_MOUSE	Q8VH51	RBM39_MOUSE	Rbm39	RNA-binding protein 39	1.14771	0.198763	0.520459	0.627073
tr|D3YYT1|D3YYT1_MOUSE	D3YYT1	D3YYT1_MOUSE	Glyr1	Putative oxidoreductase GLYR1	1.14656	0.197314	0.521134	0.627073
sp|Q6PE54|DHX40_MOUSE	Q6PE54	DHX40_MOUSE	Dhx40	Probable ATP-dependent RNA helicase DHX40	1.14621	0.196867	0.521342	0.627073
sp|P59235|NUP43_MOUSE	P59235	NUP43_MOUSE	Nup43	Nucleoporin Nup43	1.14546	0.195928	0.521779	0.627073
sp|Q3V0C5-5|UBP48_MOUSE	Q3V0C5-5	UBP48_MOUSE	Usp48	Isoform 5 of Ubiquitin carboxyl-terminal hydrolase 48	1.14241	0.192075	0.523563	0.627073
sp|Q60972|RBBP4_MOUSE	Q60972	RBBP4_MOUSE	Rbbp4	Histone-binding protein RBBP4	1.14155	0.19099	0.524064	0.627073
sp|Q9DAA6|EXOS1_MOUSE	Q9DAA6	EXOS1_MOUSE	Exosc1	Exosome complex component CSL4	1.13888	0.187612	0.525618	0.627073
sp|Q791N7|RPA12_MOUSE	Q791N7	RPA12_MOUSE	Znrd1	DNA-directed RNA polymerase I subunit RPA12	1.13633	0.184379	0.527096	0.627073
sp|Q497I4|KRT35_MOUSE	Q497I4	KRT35_MOUSE	Krt35	Keratin, type I cuticular Ha5	1.13598	0.18394	0.527297	0.627073
sp|P61620|S61A1_MOUSE	P61620	S61A1_MOUSE	Sec61a1	Protein transport protein Sec61 subunit alpha isoform 1	1.13286	0.179971	0.5291	0.627073
sp|Q9CW03|SMC3_MOUSE	Q9CW03	SMC3_MOUSE	Smc3	Structural maintenance of chromosomes protein 3	1.13284	0.179949	0.52911	0.627073
sp|Q9ES52|SHIP1_MOUSE	Q9ES52	SHIP1_MOUSE	Inpp5d	Phosphatidylinositol 3,4,5-trisphosphate 5-phosphatase 1	1.13064	0.177139	0.53038	0.627073
sp|Q99PU8|DHX30_MOUSE	Q99PU8	DHX30_MOUSE	Dhx30	Putative ATP-dependent RNA helicase DHX30	1.13035	0.176774	0.530544	0.627073
sp|P70399|TP53B_MOUSE	P70399	TP53B_MOUSE	Tp53bp1	Tumor suppressor p53-binding protein 1	1.13016	0.176523	0.530658	0.627073
sp|Q7TT37|ELP1_MOUSE	Q7TT37	ELP1_MOUSE	Ikbkap	Elongator complex protein 1	1.12939	0.175543	0.531099	0.627073
sp|Q8BRG8|TM209_MOUSE	Q8BRG8	TM209_MOUSE	Tmem209	Transmembrane protein 209	1.12885	0.17485	0.53141	0.627073
sp|P41105|RL28_MOUSE	P41105	RL28_MOUSE	Rpl28	60S ribosomal protein L28	1.12672	0.172133	0.532627	0.627073
sp|P22935|RABP2_MOUSE	P22935	RABP2_MOUSE	Crabp2	Cellular retinoic acid-binding protein 2	1.12387	0.16848	0.534254	0.627073
sp|Q9WUK4|RFC2_MOUSE	Q9WUK4	RFC2_MOUSE	Rfc2	Replication factor C subunit 2	1.12277	0.167063	0.534883	0.627073
sp|Q9D0L7|ARM10_MOUSE	Q9D0L7	ARM10_MOUSE	Armc10	Armadillo repeat-containing protein 10	1.1213	0.165176	0.535718	0.627073
sp|Q9R061|NUBP2_MOUSE	Q9R061	NUBP2_MOUSE	Nubp2	Cytosolic Fe-S cluster assembly factor NUBP2	1.12088	0.16463	0.535958	0.627073
tr|B1B0C7|B1B0C7_MOUSE	B1B0C7	B1B0C7_MOUSE	Hspg2	Basement membrane-specific heparan sulfate proteoglycan core protein	1.12063	0.164312	0.536099	0.627073
sp|Q9CQG2|MET16_MOUSE	Q9CQG2	MET16_MOUSE	Mettl16	Methyltransferase-like protein 16	1.1195	0.162851	0.536742	0.627073
sp|P07724|ALBU_MOUSE	P07724	ALBU_MOUSE	Alb	Serum albumin	1.11745	0.160211	0.5379	0.627073
sp|P43247|MSH2_MOUSE	P43247	MSH2_MOUSE	Msh2	DNA mismatch repair protein Msh2	1.11724	0.159937	0.53802	0.627073
sp|Q922Q4|P5CR2_MOUSE	Q922Q4	P5CR2_MOUSE	Pycr2	Pyrroline-5-carboxylate reductase 2	1.11704	0.15968	0.538132	0.627073
sp|Q91W43|GCSP_MOUSE	Q91W43	GCSP_MOUSE	Gldc	Glycine dehydrogenase (decarboxylating), mitochondrial	1.11626	0.158668	0.538574	0.627073
sp|P17809|GTR1_MOUSE	P17809	GTR1_MOUSE	Slc2a1	Solute carrier family 2, facilitated glucose transporter member 1	1.11502	0.157066	0.539272	0.627073
sp|Q8QZV7|ASUN_MOUSE	Q8QZV7	ASUN_MOUSE	Asun	Protein asunder homolog	1.11384	0.155538	0.539935	0.627073
sp|Q61584|FXR1_MOUSE	Q61584	FXR1_MOUSE	Fxr1	Fragile X mental retardation syndrome-related protein 1	1.11338	0.154943	0.540194	0.627073
sp|Q8CGY8|OGT1_MOUSE	Q8CGY8	OGT1_MOUSE	Ogt	UDP-N-acetylglucosamine--peptide N-acetylglucosaminyltransferase 110 kDa subunit	1.11147	0.152464	0.541265	0.627073
sp|P61750|ARF4_MOUSE	P61750	ARF4_MOUSE	Arf4	ADP-ribosylation factor 4	1.11111	0.152	0.541465	0.627073
sp|A2BE28|LAS1L_MOUSE	A2BE28	LAS1L_MOUSE	Las1l	Ribosomal biogenesis protein LAS1L	1.11104	0.151906	0.541505	0.627073
sp|Q8BWW4|LARP4_MOUSE	Q8BWW4	LARP4_MOUSE	Larp4	La-related protein 4	1.11026	0.150896	0.54194	0.627073
sp|P62918|RL8_MOUSE	P62918	RL8_MOUSE	Rpl8	60S ribosomal protein L8	1.10903	0.149298	0.542626	0.627073
sp|Q3US41|ESRP1_MOUSE	Q3US41	ESRP1_MOUSE	Esrp1	Epithelial splicing regulatory protein 1	1.1082	0.148221	0.543087	0.627073
sp|Q9ERF3|WDR61_MOUSE	Q9ERF3	WDR61_MOUSE	Wdr61	WD repeat-containing protein 61	1.10819	0.148209	0.543092	0.627073
sp|Q99KK7|DPP3_MOUSE	Q99KK7	DPP3_MOUSE	Dpp3	Dipeptidyl peptidase 3	1.10743	0.147221	0.543515	0.627073
sp|Q9D1G1|RAB1B_MOUSE	Q9D1G1	RAB1B_MOUSE	Rab1b	Ras-related protein Rab-1B	1.10743	0.147217	0.543516	0.627073
sp|P49718|MCM5_MOUSE	P49718	MCM5_MOUSE	Mcm5	DNA replication licensing factor MCM5	1.10656	0.14608	0.544001	0.627073
sp|O35643|AP1B1_MOUSE	O35643	AP1B1_MOUSE	Ap1b1	AP-1 complex subunit beta-1	1.10584	0.145145	0.544399	0.627073
sp|Q9D787|PPIL2_MOUSE	Q9D787	PPIL2_MOUSE	Ppil2	Peptidyl-prolyl cis-trans isomerase-like 2	1.10479	0.143769	0.544983	0.627073
sp|Q9D0D3|PAPD1_MOUSE	Q9D0D3	PAPD1_MOUSE	Mtpap	Poly(A) RNA polymerase, mitochondrial	1.10466	0.143605	0.545052	0.627073
sp|Q921S7|RM37_MOUSE	Q921S7	RM37_MOUSE	Mrpl37	39S ribosomal protein L37, mitochondrial	1.10352	0.142111	0.545685	0.627073
sp|Q91YE7|RBM5_MOUSE	Q91YE7	RBM5_MOUSE	Rbm5	RNA-binding protein 5	1.10259	0.140902	0.546195	0.627073
sp|Q91VY9|ZN622_MOUSE	Q91VY9	ZN622_MOUSE	Znf622	Zinc finger protein 622	1.102	0.140121	0.546524	0.627073
sp|P35821|PTN1_MOUSE	P35821	PTN1_MOUSE	Ptpn1	Tyrosine-protein phosphatase non-receptor type 1	1.10058	0.138268	0.547303	0.627073
sp|Q8BH74|NU107_MOUSE	Q8BH74	NU107_MOUSE	Nup107	Nuclear pore complex protein Nup107	1.09959	0.136962	0.54785	0.627073
sp|Q61510|TRI25_MOUSE	Q61510	TRI25_MOUSE	Trim25	E3 ubiquitin/ISG15 ligase TRIM25	1.09846	0.135483	0.548467	0.627073
sp|Q00547|HMMR_MOUSE	Q00547	HMMR_MOUSE	Hmmr	Hyaluronan mediated motility receptor	1.09742	0.134112	0.549038	0.627073
sp|P62996|TRA2B_MOUSE	P62996	TRA2B_MOUSE	Tra2b	Transformer-2 protein homolog beta	1.09675	0.133232	0.549403	0.627073
sp|Q922U1|PRPF3_MOUSE	Q922U1	PRPF3_MOUSE	Prpf3	U4/U6 small nuclear ribonucleoprotein Prp3	1.09623	0.132545	0.549688	0.627073
sp|P14131|RS16_MOUSE	P14131	RS16_MOUSE	Rps16	40S ribosomal protein S16	1.09354	0.129007	0.551148	0.627073
sp|Q99ME2|WDR6_MOUSE	Q99ME2	WDR6_MOUSE	Wdr6	WD repeat-containing protein 6	1.09204	0.127022	0.551963	0.627073
sp|Q8C1D8|IWS1_MOUSE	Q8C1D8	IWS1_MOUSE	Iws1	Protein IWS1 homolog	1.0917	0.126579	0.552144	0.627073
sp|Q9CQW2|ARL8B_MOUSE	Q9CQW2	ARL8B_MOUSE	Arl8b	ADP-ribosylation factor-like protein 8B	1.09165	0.126508	0.552173	0.627073
tr|D3YYU8|D3YYU8_MOUSE	D3YYU8	D3YYU8_MOUSE	Obsl1	Obscurin-like protein 1	1.09148	0.126284	0.552265	0.627073
sp|P70371|TERF1_MOUSE	P70371	TERF1_MOUSE	Terf1	Telomeric repeat-binding factor 1	1.09124	0.125967	0.552394	0.627073
sp|Q99L48|NMD3_MOUSE	Q99L48	NMD3_MOUSE	Nmd3	60S ribosomal export protein NMD3	1.09119	0.125908	0.552419	0.627073
sp|Q3UFM5|NOM1_MOUSE	Q3UFM5	NOM1_MOUSE	Nom1	Nucleolar MIF4G domain-containing protein 1	1.09062	0.125144	0.552731	0.627073
sp|Q6P9P6|KIF11_MOUSE	Q6P9P6	KIF11_MOUSE	Kif11	Kinesin-like protein KIF11	1.09033	0.124758	0.552888	0.627073
sp|Q8CIB5|FERM2_MOUSE	Q8CIB5	FERM2_MOUSE	Fermt2	Fermitin family homolog 2	1.0887	0.122611	0.553761	0.627073
sp|Q80ZK9|WDTC1_MOUSE	Q80ZK9	WDTC1_MOUSE	Wdtc1	WD and tetratricopeptide repeats protein 1	1.0886	0.122473	0.553816	0.627073
sp|Q8C796|RCOR2_MOUSE	Q8C796	RCOR2_MOUSE	Rcor2	REST corepressor 2	1.08851	0.122356	0.553864	0.627073
sp|Q08122|TLE3_MOUSE	Q08122	TLE3_MOUSE	Tle3	Transducin-like enhancer protein 3	1.08846	0.122294	0.553889	0.627073
sp|Q91X78|ERLN1_MOUSE	Q91X78	ERLN1_MOUSE	Erlin1	Erlin-1	1.08757	0.121109	0.554368	0.627073
sp|Q9Z1B5|MD2L1_MOUSE	Q9Z1B5	MD2L1_MOUSE	Mad2l1	Mitotic spindle assembly checkpoint protein MAD2A	1.08744	0.120934	0.554439	0.627073
sp|P62830|RL23_MOUSE	P62830	RL23_MOUSE	Rpl23	60S ribosomal protein L23	1.08702	0.120381	0.554662	0.627073
sp|Q9QYS9|QKI_MOUSE	Q9QYS9	QKI_MOUSE	Qki	Protein quaking	1.0867	0.119955	0.554834	0.627073
sp|Q5U4D9|THOC6_MOUSE	Q5U4D9	THOC6_MOUSE	Thoc6	THO complex subunit 6 homolog	1.0859	0.118892	0.555263	0.627073
sp|Q9D7G0|PRPS1_MOUSE	Q9D7G0	PRPS1_MOUSE	Prps1	Ribose-phosphate pyrophosphokinase 1	1.08535	0.11816	0.555557	0.627073
sp|Q9CXF7|CHD1L_MOUSE	Q9CXF7	CHD1L_MOUSE	Chd1l	Chromodomain-helicase-DNA-binding protein 1-like	1.08482	0.117456	0.555839	0.627073
sp|Q5SVQ0|KAT7_MOUSE	Q5SVQ0	KAT7_MOUSE	Kat7	Histone acetyltransferase KAT7	1.08382	0.11612	0.556374	0.627073
sp|P62141|PP1B_MOUSE	P62141	PP1B_MOUSE	Ppp1cb	Serine/threonine-protein phosphatase PP1-beta catalytic subunit	1.08237	0.1142	0.55714	0.627073
sp|P49717|MCM4_MOUSE	P49717	MCM4_MOUSE	Mcm4	DNA replication licensing factor MCM4	1.07985	0.110835	0.558473	0.627073
tr|F8VQJ3|F8VQJ3_MOUSE	F8VQJ3	F8VQJ3_MOUSE	Lamc1	Laminin subunit gamma-1	1.07801	0.108373	0.559442	0.627073
sp|A6H8H2|DEN4C_MOUSE	A6H8H2	DEN4C_MOUSE	Dennd4c	DENN domain-containing protein 4C	1.07697	0.106976	0.55999	0.627073
sp|P14824|ANXA6_MOUSE	P14824	ANXA6_MOUSE	Anxa6	Annexin A6	1.07656	0.106422	0.560206	0.627073
sp|Q9DBS1|TMM43_MOUSE	Q9DBS1	TMM43_MOUSE	Tmem43	Transmembrane protein 43	1.07574	0.105325	0.560635	0.627073
sp|Q64674|SPEE_MOUSE	Q64674	SPEE_MOUSE	Srm	Spermidine synthase	1.07479	0.104052	0.56113	0.627073
sp|Q4FZF3|DDX49_MOUSE	Q4FZF3	DDX49_MOUSE	Ddx49	Probable ATP-dependent RNA helicase DDX49	1.07452	0.103698	0.561267	0.627073
sp|O35841|API5_MOUSE	O35841	API5_MOUSE	Api5	Apoptosis inhibitor 5	1.07385	0.102791	0.561619	0.627073
sp|Q62433|NDRG1_MOUSE	Q62433	NDRG1_MOUSE	Ndrg1	Protein NDRG1	1.0731	0.101778	0.56201	0.627073
sp|Q61937|NPM_MOUSE	Q61937	NPM_MOUSE	Npm1	Nucleophosmin	1.07203	0.100345	0.562563	0.627073
sp|B1AY13|UBP24_MOUSE	B1AY13	UBP24_MOUSE	Usp24	Ubiquitin carboxyl-terminal hydrolase 24	1.07122	0.0992587	0.562981	0.627073
tr|F8VQC7|F8VQC7_MOUSE	F8VQC7	F8VQC7_MOUSE	Ktn1	Kinectin	1.06989	0.0974662	0.563668	0.627073
sp|Q99NH2|PARD3_MOUSE	Q99NH2	PARD3_MOUSE	Pard3	Partitioning defective 3 homolog	1.0691	0.096398	0.564075	0.627073
sp|O88895|HDAC3_MOUSE	O88895	HDAC3_MOUSE	Hdac3	Histone deacetylase 3	1.06904	0.0963095	0.564109	0.627073
sp|Q99MN9|PCCB_MOUSE	Q99MN9	PCCB_MOUSE	Pccb	Propionyl-CoA carboxylase beta chain, mitochondrial	1.0688	0.0959955	0.564229	0.627073
sp|Q810B6|ANFY1_MOUSE	Q810B6	ANFY1_MOUSE	Ankfy1	Ankyrin repeat and FYVE domain-containing protein 1	1.06823	0.095224	0.564522	0.627073
sp|Q8C6P8|ZFP57_MOUSE	Q8C6P8	ZFP57_MOUSE	Zfp57	Zinc finger protein 57	1.06778	0.0946144	0.564754	0.627073
sp|P60762|MO4L1_MOUSE	P60762	MO4L1_MOUSE	Morf4l1	Mortality factor 4-like protein 1	1.06709	0.0936879	0.565105	0.627073
sp|Q9QYI3|DNJC7_MOUSE	Q9QYI3	DNJC7_MOUSE	Dnajc7	DnaJ homolog subfamily C member 7	1.06678	0.0932654	0.565265	0.627073
sp|P35979|RL12_MOUSE	P35979	RL12_MOUSE	Rpl12	60S ribosomal protein L12	1.06644	0.0927979	0.565441	0.627073
sp|P84091|AP2M1_MOUSE	P84091	AP2M1_MOUSE	Ap2m1	AP-2 complex subunit mu	1.06432	0.0899322	0.56652	0.627073
sp|Q07076|ANXA7_MOUSE	Q07076	ANXA7_MOUSE	Anxa7	Annexin A7	1.06283	0.0879148	0.567274	0.627073
sp|Q9JIW9|RALB_MOUSE	Q9JIW9	RALB_MOUSE	Ralb	Ras-related protein Ral-B	1.06258	0.0875666	0.567404	0.627073
sp|Q8CIL4|CA131_MOUSE	Q8CIL4	CA131_MOUSE	>sp|Q8CIL4|CA131_MOUSE	Uncharacterized protein C1orf131 homolog	1.06137	0.0859305	0.568013	0.627073
sp|Q9JK91|MLH1_MOUSE	Q9JK91	MLH1_MOUSE	Mlh1	DNA mismatch repair protein Mlh1	1.06014	0.0842599	0.568631	0.627073
sp|P70122|SBDS_MOUSE	P70122	SBDS_MOUSE	Sbds	Ribosome maturation protein SBDS	1.05976	0.0837331	0.568825	0.627073
sp|Q60575|KIF1B_MOUSE	Q60575	KIF1B_MOUSE	Kif1b	Kinesin-like protein KIF1B	1.05939	0.0832297	0.569011	0.627073
sp|Q922S8|KIF2C_MOUSE	Q922S8	KIF2C_MOUSE	Kif2c	Kinesin-like protein KIF2C	1.05937	0.0832079	0.569019	0.627073
sp|Q91WC1|POTE1_MOUSE	Q91WC1	POTE1_MOUSE	Pot1	Protection of telomeres protein 1	1.05922	0.0830021	0.569095	0.627073
sp|Q61103|REQU_MOUSE	Q61103	REQU_MOUSE	Dpf2	Zinc finger protein ubi-d4	1.05827	0.0817063	0.569571	0.627073
sp|Q9Z2N8|ACL6A_MOUSE	Q9Z2N8	ACL6A_MOUSE	Actl6a	Actin-like protein 6A	1.05764	0.0808538	0.569883	0.627073
sp|Q8BKG3|PTK7_MOUSE	Q8BKG3	PTK7_MOUSE	Ptk7	Inactive tyrosine-protein kinase 7	1.05733	0.0804261	0.57004	0.627073
sp|Q9D5T0|ATAD1_MOUSE	Q9D5T0	ATAD1_MOUSE	Atad1	ATPase family AAA domain-containing protein 1	1.05668	0.0795412	0.570363	0.627073
sp|Q9D6K8|FUND2_MOUSE	Q9D6K8	FUND2_MOUSE	Fundc2	FUN14 domain-containing protein 2	1.05567	0.0781563	0.570867	0.627073
sp|Q791V5|MTCH2_MOUSE	Q791V5	MTCH2_MOUSE	Mtch2	Mitochondrial carrier homolog 2	1.05491	0.0771214	0.571243	0.627073
sp|Q9CX34|SUGT1_MOUSE	Q9CX34	SUGT1_MOUSE	Sugt1	Suppressor of G2 allele of SKP1 homolog	1.05364	0.0753762	0.571873	0.627073
sp|O88477|IF2B1_MOUSE	O88477	IF2B1_MOUSE	Igf2bp1	Insulin-like growth factor 2 mRNA-binding protein 1	1.05304	0.0745637	0.572166	0.627073
sp|Q64378|FKBP5_MOUSE	Q64378	FKBP5_MOUSE	Fkbp5	Peptidyl-prolyl cis-trans isomerase FKBP5	1.05218	0.0733782	0.572592	0.627073
sp|P62874|GBB1_MOUSE	P62874	GBB1_MOUSE	Gnb1	Guanine nucleotide-binding protein G(I)/G(S)/G(T) subunit beta-1	1.05097	0.0717262	0.573183	0.627073
sp|Q61235|SNTB2_MOUSE	Q61235	SNTB2_MOUSE	Sntb2	Beta-2-syntrophin	1.04932	0.0694539	0.573991	0.627073
sp|P11881|ITPR1_MOUSE	P11881	ITPR1_MOUSE	Itpr1	Inositol 1,4,5-trisphosphate receptor type 1	1.04854	0.0683789	0.574371	0.627073
sp|Q60596|XRCC1_MOUSE	Q60596	XRCC1_MOUSE	Xrcc1	DNA repair protein XRCC1	1.04749	0.0669324	0.574882	0.627073
sp|Q8K4L4|POF1B_MOUSE	Q8K4L4	POF1B_MOUSE	Pof1b	Protein POF1B	1.04659	0.0656904	0.575318	0.627073
sp|Q60930|VDAC2_MOUSE	Q60930	VDAC2_MOUSE	Vdac2	Voltage-dependent anion-selective channel protein 2	1.04618	0.0651248	0.575516	0.627073
sp|Q9JLN9|MTOR_MOUSE	Q9JLN9	MTOR_MOUSE	Mtor	Serine/threonine-protein kinase mTOR	1.04509	0.0636214	0.576041	0.627073
tr|Q6P5B5|Q6P5B5_MOUSE	Q6P5B5	Q6P5B5_MOUSE	Fxr2	Fragile X mental retardation syndrome-related protein 2	1.04484	0.0632761	0.576162	0.627073
sp|P54731|FAF1_MOUSE	P54731	FAF1_MOUSE	Faf1	FAS-associated factor 1	1.04481	0.0632378	0.576175	0.627073
sp|Q925I1|ATAD3_MOUSE	Q925I1	ATAD3_MOUSE	Atad3	ATPase family AAA domain-containing protein 3	1.04423	0.0624375	0.576453	0.627073
sp|Q9CU62|SMC1A_MOUSE	Q9CU62	SMC1A_MOUSE	Smc1a	Structural maintenance of chromosomes protein 1A	1.0441	0.0622634	0.576514	0.627073
sp|P21278|GNA11_MOUSE	P21278	GNA11_MOUSE	Gna11	Guanine nucleotide-binding protein subunit alpha-11	1.04407	0.0622157	0.57653	0.627073
sp|Q3UA06|PCH2_MOUSE	Q3UA06	PCH2_MOUSE	Trip13	Pachytene checkpoint protein 2 homolog	1.04365	0.061635	0.576732	0.627073
sp|P58404|STRN4_MOUSE	P58404	STRN4_MOUSE	Strn4	Striatin-4	1.04068	0.0575245	0.578147	0.627073
sp|Q9CWS4|INT11_MOUSE	Q9CWS4	INT11_MOUSE	Cpsf3l	Integrator complex subunit 11	1.04067	0.0575149	0.578151	0.627073
sp|Q6P2B1|TNPO3_MOUSE	Q6P2B1	TNPO3_MOUSE	Tnpo3	Transportin-3	1.03991	0.0564597	0.578511	0.627073
sp|O35737|HNRH1_MOUSE	O35737	HNRH1_MOUSE	Hnrnph1	Heterogeneous nuclear ribonucleoprotein H	1.03911	0.0553513	0.578889	0.627073
sp|P37913|DNLI1_MOUSE	P37913	DNLI1_MOUSE	Lig1	DNA ligase 1	1.03815	0.0540164	0.579341	0.627073
sp|Q8VCH8|UBXN4_MOUSE	Q8VCH8	UBXN4_MOUSE	Ubxn4	UBX domain-containing protein 4	1.03758	0.0532258	0.579609	0.627073
sp|P70388|RAD50_MOUSE	P70388	RAD50_MOUSE	Rad50	DNA repair protein RAD50	1.03596	0.0509709	0.580368	0.627073
sp|Q8CFI7|RPB2_MOUSE	Q8CFI7	RPB2_MOUSE	Polr2b	DNA-directed RNA polymerase II subunit RPB2	1.03543	0.0502365	0.580614	0.627073
sp|Q8BUV3|GEPH_MOUSE	Q8BUV3	GEPH_MOUSE	Gphn	Gephyrin	1.03522	0.0499342	0.580715	0.627073
sp|P62876|RPAB5_MOUSE	P62876	RPAB5_MOUSE	Polr2l	DNA-directed RNA polymerases I, II, and III subunit RPABC5	1.03396	0.0481859	0.581297	0.627073
sp|Q8VDR9|DOCK6_MOUSE	Q8VDR9	DOCK6_MOUSE	Dock6	Dedicator of cytokinesis protein 6	1.03292	0.0467271	0.581781	0.627073
tr|E9Q0S6|E9Q0S6_MOUSE	E9Q0S6	E9Q0S6_MOUSE	Tns1	Protein Tns1	1.03249	0.0461232	0.581981	0.627073
sp|Q9D1R9|RL34_MOUSE	Q9D1R9	RL34_MOUSE	Rpl34	60S ribosomal protein L34	1.03175	0.0450889	0.582322	0.627073
sp|Q9CWH0|DPPA2_MOUSE	Q9CWH0	DPPA2_MOUSE	Dppa2	Developmental pluripotency-associated protein 2	1.02981	0.0423753	0.583211	0.627073
sp|Q8VCG3|WDR74_MOUSE	Q8VCG3	WDR74_MOUSE	Wdr74	WD repeat-containing protein 74	1.029	0.0412378	0.583581	0.627073
sp|B1AQ75|KRT36_MOUSE	B1AQ75	KRT36_MOUSE	Krt36	Keratin, type I cuticular Ha6	1.02886	0.041043	0.583644	0.627073
sp|Q99PP7|TRI33_MOUSE	Q99PP7	TRI33_MOUSE	Trim33	E3 ubiquitin-protein ligase TRIM33	1.02867	0.0407793	0.58373	0.627073
sp|P62889|RL30_MOUSE	P62889	RL30_MOUSE	Rpl30	60S ribosomal protein L30	1.02844	0.0404627	0.583833	0.627073
sp|Q5EE38|ACD_MOUSE	Q5EE38	ACD_MOUSE	Acd	Adrenocortical dysplasia protein	1.02804	0.039896	0.584016	0.627073
sp|Q80TP3|UBR5_MOUSE	Q80TP3	UBR5_MOUSE	Ubr5	E3 ubiquitin-protein ligase UBR5	1.02774	0.0394782	0.584151	0.627073
sp|P97377|CDK2_MOUSE	P97377	CDK2_MOUSE	Cdk2	Cyclin-dependent kinase 2	1.02742	0.03903	0.584296	0.627073
sp|Q9ESW4|AGK_MOUSE	Q9ESW4	AGK_MOUSE	Agk	Acylglycerol kinase, mitochondrial	1.02723	0.0387545	0.584385	0.627073
sp|Q9D903|EBP2_MOUSE	Q9D903	EBP2_MOUSE	Ebna1bp2	Probable rRNA-processing protein EBP2	1.02701	0.0384437	0.584485	0.627073
sp|Q7TN89|RASE_MOUSE	Q7TN89	RASE_MOUSE	Eras	GTPase ERas	1.02689	0.0382756	0.584539	0.627073
sp|Q99MN1|SYK_MOUSE	Q99MN1	SYK_MOUSE	Kars	Lysine--tRNA ligase	1.02547	0.0362842	0.585178	0.627073
sp|P97311|MCM6_MOUSE	P97311	MCM6_MOUSE	Mcm6	DNA replication licensing factor MCM6	1.02534	0.0361092	0.585233	0.627073
sp|Q91YM4|TBRG4_MOUSE	Q91YM4	TBRG4_MOUSE	Tbrg4	Protein TBRG4	1.02503	0.035673	0.585373	0.627073
sp|P62908|RS3_MOUSE	P62908	RS3_MOUSE	Rps3	40S ribosomal protein S3	1.02361	0.0336674	0.58601	0.627073
sp|Q9Z0U1|ZO2_MOUSE	Q9Z0U1	ZO2_MOUSE	Tjp2	Tight junction protein ZO-2	1.02328	0.0332057	0.586156	0.627073
sp|Q9Z2L7|CRLF3_MOUSE	Q9Z2L7	CRLF3_MOUSE	Crlf3	Cytokine receptor-like factor 3	1.02255	0.0321773	0.586481	0.627073
sp|O35654|DPOD2_MOUSE	O35654	DPOD2_MOUSE	Pold2	DNA polymerase delta subunit 2	1.02233	0.0318564	0.586582	0.627073
sp|P51410|RL9_MOUSE	P51410	RL9_MOUSE	Rpl9	60S ribosomal protein L9	1.02169	0.0309541	0.586866	0.627073
sp|Q05512|MARK2_MOUSE	Q05512	MARK2_MOUSE	Mark2	Serine/threonine-protein kinase MARK2	1.02019	0.0288327	0.587529	0.627073
sp|Q9WUA2|SYFB_MOUSE	Q9WUA2	SYFB_MOUSE	Farsb	Phenylalanine--tRNA ligase beta subunit	1.0199	0.0284285	0.587654	0.627073
sp|Q5U4C1|GASP1_MOUSE	Q5U4C1	GASP1_MOUSE	Gprasp1	G-protein coupled receptor-associated sorting protein 1	1.01867	0.02668	0.588197	0.627073
sp|Q99020|ROAA_MOUSE	Q99020	ROAA_MOUSE	Hnrnpab	Heterogeneous nuclear ribonucleoprotein A/B	1.01855	0.0265161	0.588247	0.627073
sp|Q91VC3|IF4A3_MOUSE	Q91VC3	IF4A3_MOUSE	Eif4a3	Eukaryotic initiation factor 4A-III	1.01726	0.0246846	0.588811	0.627073
sp|Q9WU00|NRF1_MOUSE	Q9WU00	NRF1_MOUSE	Nrf1	Nuclear respiratory factor 1	1.015	0.0214728	0.589791	0.627073
sp|P17918|PCNA_MOUSE	P17918	PCNA_MOUSE	Pcna	Proliferating cell nuclear antigen	1.01365	0.0195652	0.590367	0.627073
sp|Q3TXS7|PSMD1_MOUSE	Q3TXS7	PSMD1_MOUSE	Psmd1	26S proteasome non-ATPase regulatory subunit 1	1.01262	0.0180997	0.590807	0.627073
sp|P46735|MYO1B_MOUSE	P46735	MYO1B_MOUSE	Myo1b	Unconventional myosin-Ib	1.01241	0.0177927	0.590899	0.627073
sp|Q9CQC6|BZW1_MOUSE	Q9CQC6	BZW1_MOUSE	Bzw1	Basic leucine zipper and W2 domain-containing protein 1	1.01209	0.0173316	0.591037	0.627073
sp|Q64516|GLPK_MOUSE	Q64516	GLPK_MOUSE	Gk	Glycerol kinase	1.01193	0.0171084	0.591104	0.627073
sp|Q9EPK7|XPO7_MOUSE	Q9EPK7	XPO7_MOUSE	Xpo7	Exportin-7	1.0118	0.0169233	0.591159	0.627073
sp|P62702|RS4X_MOUSE	P62702	RS4X_MOUSE	Rps4x	40S ribosomal protein S4, X isoform	1.01037	0.014886	0.591764	0.627073
sp|P97379|G3BP2_MOUSE	P97379	G3BP2_MOUSE	G3bp2	Ras GTPase-activating protein-binding protein 2	1.01006	0.0144372	0.591897	0.627073
sp|Q3UV17|K22O_MOUSE	Q3UV17	K22O_MOUSE	Krt76	Keratin, type II cytoskeletal 2 oral	1.0099	0.014212	0.591963	0.627073
sp|Q8BU30|SYIC_MOUSE	Q8BU30	SYIC_MOUSE	Iars	Isoleucine--tRNA ligase, cytoplasmic	1.00953	0.0136824	0.592119	0.627073
sp|P62737|ACTA_MOUSE	P62737	ACTA_MOUSE	Acta2	Actin, aortic smooth muscle	1.00839	0.0120503	0.592599	0.627073
sp|Q9WVA3|BUB3_MOUSE	Q9WVA3	BUB3_MOUSE	Bub3	Mitotic checkpoint protein BUB3	1.00664	0.00954816	0.593327	0.627073
sp|Q99MJ9|DDX50_MOUSE	Q99MJ9	DDX50_MOUSE	Ddx50	ATP-dependent RNA helicase DDX50	1.0053	0.00762281	0.593883	0.627073
sp|Q9CPQ3|TOM22_MOUSE	Q9CPQ3	TOM22_MOUSE	Tomm22	Mitochondrial import receptor subunit TOM22 homolog	1.00499	0.00718542	0.594009	0.627073
sp|P63087-2|PP1G_MOUSE	P63087-2	PP1G_MOUSE	Ppp1cc	Isoform Gamma-2 of Serine/threonine-protein phosphatase PP1-gamma catalytic subunit	1.00409	0.00589306	0.594379	0.627073
sp|Q91VI7|RINI_MOUSE	Q91VI7	RINI_MOUSE	Rnh1	Ribonuclease inhibitor	1.00376	0.00540872	0.594517	0.627073
sp|P14602|HSPB1_MOUSE	P14602	HSPB1_MOUSE	Hspb1	Heat shock protein beta-1	1.00323	0.00465706	0.594731	0.627073
sp|P05784|K1C18_MOUSE	P05784	K1C18_MOUSE	Krt18	Keratin, type I cytoskeletal 18	1.0027	0.00389461	0.594948	0.627073
sp|Q80Y17|L2GL1_MOUSE	Q80Y17	L2GL1_MOUSE	Llgl1	Lethal(2) giant larvae protein homolog 1	1.00259	0.00373587	0.594993	0.627073
sp|O88700|BLM_MOUSE	O88700	BLM_MOUSE	Blm	Bloom syndrome protein homolog	1.00245	0.00353709	0.595049	0.627073
sp|Q8CHT3|INT5_MOUSE	Q8CHT3	INT5_MOUSE	Ints5	Integrator complex subunit 5	1.00085	0.00122071	0.595701	0.627073
sp|O35382|EXOC4_MOUSE	O35382	EXOC4_MOUSE	Exoc4	Exocyst complex component 4	0.999408	-0.000854866	0.59628	0.627073
sp|Q8C0C7|SYFA_MOUSE	Q8C0C7	SYFA_MOUSE	Farsa	Phenylalanine--tRNA ligase alpha subunit	0.998556	-0.00208469	0.596621	0.627073
sp|Q9QZQ8|H2AY_MOUSE	Q9QZQ8	H2AY_MOUSE	H2afy	Core histone macro-H2A.1	0.998051	-0.00281449	0.596823	0.627073
sp|Q6IME9|K2C72_MOUSE	Q6IME9	K2C72_MOUSE	Krt72	Keratin, type II cytoskeletal 72	0.997228	-0.00400532	0.59715	0.627073
sp|Q9JKP5|MBNL1_MOUSE	Q9JKP5	MBNL1_MOUSE	Mbnl1	Muscleblind-like protein 1	0.997054	-0.0042559	0.597219	0.627073
sp|P61514|RL37A_MOUSE	P61514	RL37A_MOUSE	Rpl37a	60S ribosomal protein L37a	0.996845	-0.00455931	0.597302	0.627073
sp|Q9QXK3|COPG2_MOUSE	Q9QXK3	COPG2_MOUSE	Copg2	Coatomer subunit gamma-2	0.995286	-0.00681698	0.597917	0.627073
sp|Q1HFZ0|NSUN2_MOUSE	Q1HFZ0	NSUN2_MOUSE	Nsun2	tRNA (cytosine(34)-C(5))-methyltransferase	0.995228	-0.00690052	0.597939	0.627073
sp|Q3UFY8|MRRP1_MOUSE	Q3UFY8	MRRP1_MOUSE	Trmt10c	Mitochondrial ribonuclease P protein 1	0.994952	-0.00730186	0.598048	0.627073
sp|A2BH40|ARI1A_MOUSE	A2BH40	ARI1A_MOUSE	Arid1a	AT-rich interactive domain-containing protein 1A	0.993259	-0.0097583	0.598709	0.627073
sp|P57785|LFTY2_MOUSE	P57785	LFTY2_MOUSE	Lefty2	Left-right determination factor 2	0.993025	-0.0100981	0.598799	0.627073
sp|Q80W47|WIPI2_MOUSE	Q80W47	WIPI2_MOUSE	Wipi2	WD repeat domain phosphoinositide-interacting protein 2	0.992271	-0.0111933	0.599091	0.627073
sp|P80314|TCPB_MOUSE	P80314	TCPB_MOUSE	Cct2	T-complex protein 1 subunit beta	0.99213	-0.0113987	0.599146	0.627073
sp|P97930|KTHY_MOUSE	P97930	KTHY_MOUSE	Dtymk	Thymidylate kinase	0.991834	-0.0118288	0.59926	0.627073
sp|Q6A026|PDS5A_MOUSE	Q6A026	PDS5A_MOUSE	Pds5a	Sister chromatid cohesion protein PDS5 homolog A	0.990991	-0.0130565	0.599585	0.627073
sp|P55096|ABCD3_MOUSE	P55096	ABCD3_MOUSE	Abcd3	ATP-binding cassette sub-family D member 3	0.990795	-0.0133414	0.59966	0.627073
sp|Q99LB2|DHRS4_MOUSE	Q99LB2	DHRS4_MOUSE	Dhrs4	Dehydrogenase/reductase SDR family member 4	0.990183	-0.0142336	0.599894	0.627073
sp|Q8R323|RFC3_MOUSE	Q8R323	RFC3_MOUSE	Rfc3	Replication factor C subunit 3	0.989738	-0.0148816	0.600064	0.627073
sp|Q8BMC4|NOP9_MOUSE	Q8BMC4	NOP9_MOUSE	Nop9	Nucleolar protein 9	0.98946	-0.0152867	0.60017	0.627073
sp|Q8BVU5|NUDT9_MOUSE	Q8BVU5	NUDT9_MOUSE	Nudt9	ADP-ribose pyrophosphatase, mitochondrial	0.989138	-0.0157568	0.600292	0.627073
sp|Q3UMU9|HDGR2_MOUSE	Q3UMU9	HDGR2_MOUSE	Hdgfrp2	Hepatoma-derived growth factor-related protein 2	0.98911	-0.0157967	0.600303	0.627073
sp|Q61234|SNTA1_MOUSE	Q61234	SNTA1_MOUSE	Snta1	Alpha-1-syntrophin	0.988646	-0.0164748	0.600479	0.627073
sp|Q9ERV1|MKRN2_MOUSE	Q9ERV1	MKRN2_MOUSE	Mkrn2	Probable E3 ubiquitin-protein ligase makorin-2	0.988317	-0.0169541	0.600603	0.627073
sp|P61255|RL26_MOUSE	P61255	RL26_MOUSE	Rpl26	60S ribosomal protein L26	0.98782	-0.0176798	0.600791	0.627073
sp|O35900|LSM2_MOUSE	O35900	LSM2_MOUSE	Lsm2	U6 snRNA-associated Sm-like protein LSm2	0.98699	-0.018893	0.601103	0.627073
sp|P29268|CTGF_MOUSE	P29268	CTGF_MOUSE	Ctgf	Connective tissue growth factor	0.986902	-0.0190216	0.601136	0.627073
sp|P50580|PA2G4_MOUSE	P50580	PA2G4_MOUSE	Pa2g4	Proliferation-associated protein 2G4	0.986863	-0.0190789	0.601151	0.627073
sp|P62281|RS11_MOUSE	P62281	RS11_MOUSE	Rps11	40S ribosomal protein S11	0.986076	-0.0202286	0.601445	0.627073
sp|Q8BHK9|ERC6L_MOUSE	Q8BHK9	ERC6L_MOUSE	Ercc6l	DNA excision repair protein ERCC-6-like	0.985584	-0.0209487	0.601629	0.627073
sp|P97477|AURKA_MOUSE	P97477	AURKA_MOUSE	Aurka	Aurora kinase A	0.9855	-0.0210719	0.60166	0.627073
sp|Q922B2|SYDC_MOUSE	Q922B2	SYDC_MOUSE	Dars	Aspartate--tRNA ligase, cytoplasmic	0.984992	-0.0218156	0.601849	0.627073
sp|E9PZJ8|ASCC3_MOUSE	E9PZJ8	ASCC3_MOUSE	Ascc3	Activating signal cointegrator 1 complex subunit 3	0.984599	-0.0223914	0.601994	0.627073
sp|Q8BGA5|KRR1_MOUSE	Q8BGA5	KRR1_MOUSE	Krr1	KRR1 small subunit processome component homolog	0.982577	-0.0253579	0.602738	0.627073
sp|A2AGT5|CKAP5_MOUSE	A2AGT5	CKAP5_MOUSE	Ckap5	Cytoskeleton-associated protein 5	0.9825	-0.0254701	0.602766	0.627073
sp|Q9CRC8|LRC40_MOUSE	Q9CRC8	LRC40_MOUSE	Lrrc40	Leucine-rich repeat-containing protein 40	0.980662	-0.0281728	0.603435	0.627073
sp|Q9ESZ8|GTF2I_MOUSE	Q9ESZ8	GTF2I_MOUSE	Gtf2i	General transcription factor II-I	0.980373	-0.028597	0.603539	0.627073
sp|Q9CPN8|IF2B3_MOUSE	Q9CPN8	IF2B3_MOUSE	Igf2bp3	Insulin-like growth factor 2 mRNA-binding protein 3	0.979904	-0.0292879	0.603708	0.627073
sp|Q5SSZ5|TENS3_MOUSE	Q5SSZ5	TENS3_MOUSE	Tns3	Tensin-3	0.979675	-0.0296247	0.60379	0.627073
sp|Q3TUH1|TAM41_MOUSE	Q3TUH1	TAM41_MOUSE	Tamm41	Mitochondrial translocator assembly and maintenance protein 41 homolog	0.978074	-0.0319845	0.604362	0.627073
sp|P46935|NEDD4_MOUSE	P46935	NEDD4_MOUSE	Nedd4	E3 ubiquitin-protein ligase NEDD4	0.978054	-0.0320138	0.604369	0.627073
sp|Q8QZY1|EIF3L_MOUSE	Q8QZY1	EIF3L_MOUSE	Eif3l	Eukaryotic translation initiation factor 3 subunit L	0.977823	-0.0323553	0.604452	0.627073
tr|E9PYH6|E9PYH6_MOUSE	E9PYH6	E9PYH6_MOUSE	Setd1a	Protein Setd1a	0.977716	-0.0325128	0.604489	0.627073
sp|P70700|RPA2_MOUSE	P70700	RPA2_MOUSE	Polr1b	DNA-directed RNA polymerase I subunit RPA2	0.977712	-0.0325187	0.604491	0.627073
sp|P62717|RL18A_MOUSE	P62717	RL18A_MOUSE	Rpl18a	60S ribosomal protein L18a	0.977374	-0.033018	0.604611	0.627073
sp|P67778|PHB_MOUSE	P67778	PHB_MOUSE	Phb	Prohibitin	0.975843	-0.0352792	0.60515	0.627073
sp|P61963|DCAF7_MOUSE	P61963	DCAF7_MOUSE	Dcaf7	DDB1- and CUL4-associated factor 7	0.975406	-0.0359258	0.605303	0.627073
sp|Q9D0I9|SYRC_MOUSE	Q9D0I9	SYRC_MOUSE	Rars	Arginine--tRNA ligase, cytoplasmic	0.974986	-0.0365463	0.605449	0.627073
sp|Q61211|EIF2D_MOUSE	Q61211	EIF2D_MOUSE	Eif2d	Eukaryotic translation initiation factor 2D	0.974462	-0.0373217	0.605632	0.627073
sp|Q587J6|LITD1_MOUSE	Q587J6	LITD1_MOUSE	L1td1	LINE-1 type transposase domain-containing protein 1	0.974456	-0.0373304	0.605634	0.627073
sp|Q99MV7|RNF17_MOUSE	Q99MV7	RNF17_MOUSE	Rnf17	RING finger protein 17	0.97414	-0.0377991	0.605744	0.627073
sp|P05480|SRC_MOUSE	P05480	SRC_MOUSE	Src	Neuronal proto-oncogene tyrosine-protein kinase Src	0.973846	-0.0382349	0.605845	0.627073
sp|Q9D8W5|PSD12_MOUSE	Q9D8W5	PSD12_MOUSE	Psmd12	26S proteasome non-ATPase regulatory subunit 12	0.97378	-0.0383317	0.605868	0.627073
sp|P68040|GBLP_MOUSE	P68040	GBLP_MOUSE	Gnb2l1	Guanine nucleotide-binding protein subunit beta-2-like 1	0.973533	-0.0386983	0.605953	0.627073
sp|Q99N94|RM09_MOUSE	Q99N94	RM09_MOUSE	Mrpl9	39S ribosomal protein L9, mitochondrial	0.973081	-0.0393675	0.606109	0.627073
sp|P14211|CALR_MOUSE	P14211	CALR_MOUSE	Calr	Calreticulin	0.972106	-0.0408149	0.606444	0.627073
sp|Q91W36|UBP3_MOUSE	Q91W36	UBP3_MOUSE	Usp3	Ubiquitin carboxyl-terminal hydrolase 3	0.972022	-0.0409386	0.606472	0.627073
sp|Q8BWT5|DIP2A_MOUSE	Q8BWT5	DIP2A_MOUSE	Dip2a	Disco-interacting protein 2 homolog A	0.971937	-0.0410657	0.606502	0.627073
sp|Q8CG48|SMC2_MOUSE	Q8CG48	SMC2_MOUSE	Smc2	Structural maintenance of chromosomes protein 2	0.970886	-0.0426255	0.606859	0.627073
sp|Q60931|VDAC3_MOUSE	Q60931	VDAC3_MOUSE	Vdac3	Voltage-dependent anion-selective channel protein 3	0.970365	-0.0434005	0.607035	0.627073
sp|Q9QXX4|CMC2_MOUSE	Q9QXX4	CMC2_MOUSE	Slc25a13	Calcium-binding mitochondrial carrier protein Aralar2	0.969198	-0.0451369	0.607428	0.627073
sp|Q9CYR0|SSBP_MOUSE	Q9CYR0	SSBP_MOUSE	Ssbp1	Single-stranded DNA-binding protein, mitochondrial	0.96909	-0.0452975	0.607464	0.627073
sp|Q9CT10|RANB3_MOUSE	Q9CT10	RANB3_MOUSE	Ranbp3	Ran-binding protein 3	0.968922	-0.0455477	0.60752	0.627073
sp|P19253|RL13A_MOUSE	P19253	RL13A_MOUSE	Rpl13a	60S ribosomal protein L13a	0.967857	-0.0471349	0.607875	0.627073
sp|Q04735|CDK16_MOUSE	Q04735	CDK16_MOUSE	Cdk16	Cyclin-dependent kinase 16	0.967784	-0.0472423	0.607899	0.627073
sp|Q9JI44|DMAP1_MOUSE	Q9JI44	DMAP1_MOUSE	Dmap1	DNA methyltransferase 1-associated protein 1	0.966583	-0.0490351	0.608296	0.627073
sp|Q9R0N0|GALK1_MOUSE	Q9R0N0	GALK1_MOUSE	Galk1	Galactokinase	0.966409	-0.0492946	0.608353	0.627073
sp|A2ABU4|MYOM3_MOUSE	A2ABU4	MYOM3_MOUSE	Myom3	Myomesin-3	0.966297	-0.0494608	0.60839	0.627073
sp|Q9JI11|STK4_MOUSE	Q9JI11	STK4_MOUSE	Stk4	Serine/threonine-protein kinase 4	0.965402	-0.0507976	0.608682	0.627073
sp|P80317|TCPZ_MOUSE	P80317	TCPZ_MOUSE	Cct6a	T-complex protein 1 subunit zeta	0.96518	-0.05113	0.608755	0.627073
sp|Q8K126|RF1M_MOUSE	Q8K126	RF1M_MOUSE	Mtrf1	Peptide chain release factor 1, mitochondrial	0.963865	-0.0530966	0.609181	0.627073
sp|P43006|EAA2_MOUSE	P43006	EAA2_MOUSE	Slc1a2	Excitatory amino acid transporter 2	0.963264	-0.0539967	0.609374	0.627073
sp|Q9JHW4|SELB_MOUSE	Q9JHW4	SELB_MOUSE	Eefsec	Selenocysteine-specific elongation factor	0.963211	-0.0540755	0.609391	0.627073
tr|Q3UJB0|Q3UJB0_MOUSE	Q3UJB0	Q3UJB0_MOUSE	Sf3b2	Protein Sf3b2	0.963045	-0.0543249	0.609444	0.627073
sp|Q99J95|CDK9_MOUSE	Q99J95	CDK9_MOUSE	Cdk9	Cyclin-dependent kinase 9	0.962722	-0.0548081	0.609547	0.627073
sp|Q8BIW1|PRUNE_MOUSE	Q8BIW1	PRUNE_MOUSE	Prune	Protein prune homolog	0.961822	-0.0561577	0.609834	0.627073
sp|A6H611|MIPEP_MOUSE	A6H611	MIPEP_MOUSE	Mipep	Mitochondrial intermediate peptidase	0.961517	-0.0566162	0.60993	0.627073
sp|Q9Z0X1|AIFM1_MOUSE	Q9Z0X1	AIFM1_MOUSE	Aifm1	Apoptosis-inducing factor 1, mitochondrial	0.961239	-0.0570324	0.610018	0.627073
sp|Q8K1C0|ANGE2_MOUSE	Q8K1C0	ANGE2_MOUSE	Angel2	Protein angel homolog 2	0.959679	-0.0593764	0.610508	0.627073
sp|O08528|HXK2_MOUSE	O08528	HXK2_MOUSE	Hk2	Hexokinase-2	0.959545	-0.0595775	0.61055	0.627073
sp|P41230|KDM5C_MOUSE	P41230	KDM5C_MOUSE	Kdm5c	Lysine-specific demethylase 5C	0.958481	-0.0611778	0.61088	0.627073
sp|Q91YQ5|RPN1_MOUSE	Q91YQ5	RPN1_MOUSE	Rpn1	Dolichyl-diphosphooligosaccharide--protein glycosyltransferase subunit 1	0.958357	-0.0613642	0.610918	0.627073
sp|Q62351|TFR1_MOUSE	Q62351	TFR1_MOUSE	Tfrc	Transferrin receptor protein 1	0.95794	-0.0619931	0.611046	0.627073
sp|Q922W5|P5CR1_MOUSE	Q922W5	P5CR1_MOUSE	Pycr1	Pyrroline-5-carboxylate reductase 1, mitochondrial	0.95762	-0.0624752	0.611145	0.627073
sp|P52479|UBP10_MOUSE	P52479	UBP10_MOUSE	Usp10	Ubiquitin carboxyl-terminal hydrolase 10	0.956598	-0.0640149	0.611457	0.627073
sp|Q60932|VDAC1_MOUSE	Q60932	VDAC1_MOUSE	Vdac1	Voltage-dependent anion-selective channel protein 1	0.954286	-0.0675061	0.612153	0.627073
sp|Q9D2R8|RT33_MOUSE	Q9D2R8	RT33_MOUSE	Mrps33	28S ribosomal protein S33, mitochondrial	0.952803	-0.0697505	0.612593	0.627073
sp|Q5SF07|IF2B2_MOUSE	Q5SF07	IF2B2_MOUSE	Igf2bp2	Insulin-like growth factor 2 mRNA-binding protein 2	0.951827	-0.0712286	0.612879	0.627073
sp|Q9CZD3|SYG_MOUSE	Q9CZD3	SYG_MOUSE	Gars	Glycine--tRNA ligase	0.951066	-0.0723821	0.6131	0.627073
sp|Q8CDG3|VCIP1_MOUSE	Q8CDG3	VCIP1_MOUSE	Vcpip1	Deubiquitinating protein VCIP135	0.950514	-0.0732197	0.61326	0.627073
sp|E9Q557|DESP_MOUSE	E9Q557	DESP_MOUSE	Dsp	Desmoplakin	0.950179	-0.0737292	0.613357	0.627073
sp|P27641|XRCC5_MOUSE	P27641	XRCC5_MOUSE	Xrcc5	X-ray repair cross-complementing protein 5	0.950028	-0.0739586	0.6134	0.627073
sp|Q62167|DDX3X_MOUSE	Q62167	DDX3X_MOUSE	Ddx3x	ATP-dependent RNA helicase DDX3X	0.94938	-0.0749422	0.613585	0.627073
sp|P52432|RPAC1_MOUSE	P52432	RPAC1_MOUSE	Polr1c	DNA-directed RNA polymerases I and III subunit RPAC1	0.949311	-0.0750471	0.613605	0.627073
sp|Q6P9R4|ARHGI_MOUSE	Q6P9R4	ARHGI_MOUSE	Arhgef18	Rho guanine nucleotide exchange factor 18	0.949186	-0.075237	0.613641	0.627073
sp|Q99K70|RRAGC_MOUSE	Q99K70	RRAGC_MOUSE	Rragc	Ras-related GTP-binding protein C	0.946513	-0.079306	0.614393	0.627073
sp|Q9Z2V5|HDAC6_MOUSE	Q9Z2V5	HDAC6_MOUSE	Hdac6	Histone deacetylase 6	0.946329	-0.0795867	0.614445	0.627073
sp|Q99M87|DNJA3_MOUSE	Q99M87	DNJA3_MOUSE	Dnaja3	DnaJ homolog subfamily A member 3, mitochondrial	0.945655	-0.080614	0.614631	0.627073
sp|Q91YD3|DCP1A_MOUSE	Q91YD3	DCP1A_MOUSE	Dcp1a	mRNA-decapping enzyme 1A	0.94467	-0.0821179	0.614901	0.627073
sp|Q9JK30-2|ORC3_MOUSE	Q9JK30-2	ORC3_MOUSE	Orc3	Isoform 2 of Origin recognition complex subunit 3	0.94355	-0.0838293	0.615205	0.627073
sp|Q78PY7|SND1_MOUSE	Q78PY7	SND1_MOUSE	Snd1	Staphylococcal nuclease domain-containing protein 1	0.942398	-0.0855911	0.615514	0.627073
sp|Q8BPM2|M4K5_MOUSE	Q8BPM2	M4K5_MOUSE	Map4k5	Mitogen-activated protein kinase kinase kinase kinase 5	0.941944	-0.0862863	0.615635	0.627073
sp|Q8BP67|RL24_MOUSE	Q8BP67	RL24_MOUSE	Rpl24	60S ribosomal protein L24	0.941299	-0.0872756	0.615806	0.627073
sp|Q9Z1F9|SAE2_MOUSE	Q9Z1F9	SAE2_MOUSE	Uba2	SUMO-activating enzyme subunit 2	0.941158	-0.0874909	0.615843	0.627073
sp|Q9JJI8|RL38_MOUSE	Q9JJI8	RL38_MOUSE	Rpl38	60S ribosomal protein L38	0.941141	-0.0875178	0.615848	0.627073
sp|Q91WQ5|TAF5L_MOUSE	Q91WQ5	TAF5L_MOUSE	Taf5l	TAF5-like RNA polymerase II p300/CBP-associated factor-associated factor 65 kDa subunit 5L	0.940769	-0.088088	0.615946	0.627073
sp|Q9DBG3|AP2B1_MOUSE	Q9DBG3	AP2B1_MOUSE	Ap2b1	AP-2 complex subunit beta	0.94039	-0.0886687	0.616045	0.627073
sp|Q61001|LAMA5_MOUSE	Q61001	LAMA5_MOUSE	Lama5	Laminin subunit alpha-5	0.940056	-0.0891815	0.616132	0.627073
sp|O88487|DC1I2_MOUSE	O88487	DC1I2_MOUSE	Dync1i2	Cytoplasmic dynein 1 intermediate chain 2	0.939331	-0.0902941	0.61632	0.627073
sp|Q9QZH3|PPIE_MOUSE	Q9QZH3	PPIE_MOUSE	Ppie	Peptidyl-prolyl cis-trans isomerase E	0.938781	-0.0911389	0.616462	0.627073
sp|Q9CXW4|RL11_MOUSE	Q9CXW4	RL11_MOUSE	Rpl11	60S ribosomal protein L11	0.938226	-0.0919934	0.616605	0.627073
sp|Q6IFZ6|K2C1B_MOUSE	Q6IFZ6	K2C1B_MOUSE	Krt77	Keratin, type II cytoskeletal 1b	0.937304	-0.0934106	0.616839	0.627073
sp|Q61024|ASNS_MOUSE	Q61024	ASNS_MOUSE	Asns	Asparagine synthetase [glutamine-hydrolyzing]	0.936895	-0.0940407	0.616942	0.627073
sp|Q62318|TIF1B_MOUSE	Q62318	TIF1B_MOUSE	Trim28	Transcription intermediary factor 1-beta	0.936847	-0.0941147	0.616954	0.627073
sp|Q9DAW9|CNN3_MOUSE	Q9DAW9	CNN3_MOUSE	Cnn3	Calponin-3	0.934749	-0.0973488	0.617476	0.627073
tr|Q80ZM5|Q80ZM5_MOUSE	Q80ZM5	Q80ZM5_MOUSE	H1fx	H1 histone family, member X	0.934715	-0.0974019	0.617484	0.627073
sp|P20263|PO5F1_MOUSE	P20263	PO5F1_MOUSE	Pou5f1	POU domain, class 5, transcription factor 1	0.933343	-0.0995207	0.617819	0.627073
sp|P43276|H15_MOUSE	P43276	H15_MOUSE	Hist1h1b	Histone H1.5	0.933284	-0.0996126	0.617833	0.627073
sp|Q61136|PRP4B_MOUSE	Q61136	PRP4B_MOUSE	Prpf4b	Serine/threonine-protein kinase PRP4 homolog	0.932605	-0.100662	0.617997	0.627073
sp|Q69ZS7|HBS1L_MOUSE	Q69ZS7	HBS1L_MOUSE	Hbs1l	HBS1-like protein	0.932214	-0.101267	0.61809	0.627073
sp|Q9JLI8|SART3_MOUSE	Q9JLI8	SART3_MOUSE	Sart3	Squamous cell carcinoma antigen recognized by T-cells 3	0.931933	-0.101701	0.618157	0.627073
sp|O35691|PININ_MOUSE	O35691	PININ_MOUSE	Pnn	Pinin	0.931924	-0.101716	0.618159	0.627073
sp|Q80XN0|BDH_MOUSE	Q80XN0	BDH_MOUSE	Bdh1	D-beta-hydroxybutyrate dehydrogenase, mitochondrial	0.931383	-0.102553	0.618287	0.627073
sp|P97366|EVI5_MOUSE	P97366	EVI5_MOUSE	Evi5	Ecotropic viral integration site 5 protein	0.930367	-0.104128	0.618526	0.627073
sp|Q8BQM4|HEAT3_MOUSE	Q8BQM4	HEAT3_MOUSE	Heatr3	HEAT repeat-containing protein 3	0.929304	-0.105777	0.618772	0.627073
sp|Q8VED9|LEGL_MOUSE	Q8VED9	LEGL_MOUSE	Lgalsl	Galectin-related protein	0.92926	-0.105846	0.618782	0.627073
sp|Q5I043|UBP28_MOUSE	Q5I043	UBP28_MOUSE	Usp28	Ubiquitin carboxyl-terminal hydrolase 28	0.928894	-0.106414	0.618867	0.627073
sp|Q6PGH2|HN1L_MOUSE	Q6PGH2	HN1L_MOUSE	Hn1l	Hematological and neurological expressed 1-like protein	0.928702	-0.106712	0.61891	0.627073
sp|Q921G7|ETFD_MOUSE	Q921G7	ETFD_MOUSE	Etfdh	Electron transfer flavoprotein-ubiquinone oxidoreductase, mitochondrial	0.928603	-0.106866	0.618933	0.627073
sp|P42669|PURA_MOUSE	P42669	PURA_MOUSE	Pura	Transcriptional activator protein Pur-alpha	0.928093	-0.107658	0.619049	0.627073
sp|Q8CG47|SMC4_MOUSE	Q8CG47	SMC4_MOUSE	Smc4	Structural maintenance of chromosomes protein 4	0.927265	-0.108947	0.619236	0.627073
sp|P61211|ARL1_MOUSE	P61211	ARL1_MOUSE	Arl1	ADP-ribosylation factor-like protein 1	0.926431	-0.110244	0.619422	0.627073
sp|Q8BWZ3|NAA25_MOUSE	Q8BWZ3	NAA25_MOUSE	Naa25	N-alpha-acetyltransferase 25, NatB auxiliary subunit	0.925959	-0.110979	0.619526	0.627073
sp|P35585|AP1M1_MOUSE	P35585	AP1M1_MOUSE	Ap1m1	AP-1 complex subunit mu-1	0.925786	-0.11125	0.619565	0.627073
sp|O54774|AP3D1_MOUSE	O54774	AP3D1_MOUSE	Ap3d1	AP-3 complex subunit delta-1	0.925703	-0.111378	0.619583	0.627073
sp|Q99NB9|SF3B1_MOUSE	Q99NB9	SF3B1_MOUSE	Sf3b1	Splicing factor 3B subunit 1	0.925516	-0.11167	0.619624	0.627073
sp|Q8K310|MATR3_MOUSE	Q8K310	MATR3_MOUSE	Matr3	Matrin-3	0.925277	-0.112043	0.619676	0.627073
sp|Q63932|MP2K2_MOUSE	Q63932	MP2K2_MOUSE	Map2k2	Dual specificity mitogen-activated protein kinase kinase 2	0.924851	-0.112708	0.619769	0.627073
sp|P11276|FINC_MOUSE	P11276	FINC_MOUSE	Fn1	Fibronectin	0.924833	-0.112735	0.619773	0.627073
sp|Q9R0M6|RAB9A_MOUSE	Q9R0M6	RAB9A_MOUSE	Rab9a	Ras-related protein Rab-9A	0.922762	-0.11597	0.620217	0.627073
sp|P62071|RRAS2_MOUSE	P62071	RRAS2_MOUSE	Rras2	Ras-related protein R-Ras2	0.922463	-0.116437	0.62028	0.627073
sp|P30681|HMGB2_MOUSE	P30681	HMGB2_MOUSE	Hmgb2	High mobility group protein B2	0.922125	-0.116966	0.620351	0.627073
sp|Q9EPE9|AT131_MOUSE	Q9EPE9	AT131_MOUSE	Atp13a1	Manganese-transporting ATPase 13A1	0.92194	-0.117255	0.620389	0.627073
sp|Q8CEC6|PPWD1_MOUSE	Q8CEC6	PPWD1_MOUSE	Ppwd1	Peptidylprolyl isomerase domain and WD repeat-containing protein 1	0.921742	-0.117564	0.62043	0.627073
sp|Q8R4X3|RBM12_MOUSE	Q8R4X3	RBM12_MOUSE	Rbm12	RNA-binding protein 12	0.921298	-0.11826	0.620523	0.627073
sp|Q811S7|UBIP1_MOUSE	Q811S7	UBIP1_MOUSE	Ubp1	Upstream-binding protein 1	0.920789	-0.119057	0.620627	0.627073
sp|P16858|G3P_MOUSE	P16858	G3P_MOUSE	Gapdh	Glyceraldehyde-3-phosphate dehydrogenase	0.919863	-0.120509	0.620816	0.627073
sp|Q9D0F1|NDC80_MOUSE	Q9D0F1	NDC80_MOUSE	Ndc80	Kinetochore protein NDC80 homolog	0.919292	-0.121405	0.620931	0.627073
sp|Q9JL04|FMN2_MOUSE	Q9JL04	FMN2_MOUSE	Fmn2	Formin-2	0.918489	-0.122665	0.621092	0.627073
sp|P62880|GBB2_MOUSE	P62880	GBB2_MOUSE	Gnb2	Guanine nucleotide-binding protein G(I)/G(S)/G(T) subunit beta-2	0.918407	-0.122795	0.621108	0.627073
sp|Q64737|PUR2_MOUSE	Q64737	PUR2_MOUSE	Gart	Trifunctional purine biosynthetic protein adenosine-3	0.917175	-0.124731	0.62135	0.627073
sp|Q91W50|CSDE1_MOUSE	Q91W50	CSDE1_MOUSE	Csde1	Cold shock domain-containing protein E1	0.916836	-0.125265	0.621416	0.627073
sp|O88559|MEN1_MOUSE	O88559	MEN1_MOUSE	Men1	Menin	0.916722	-0.125443	0.621437	0.627073
sp|Q99KK9|SYHM_MOUSE	Q99KK9	SYHM_MOUSE	Hars2	Probable histidine--tRNA ligase, mitochondrial	0.916462	-0.125853	0.621488	0.627073
sp|P54729|NUB1_MOUSE	P54729	NUB1_MOUSE	Nub1	NEDD8 ultimate buster 1	0.916375	-0.125991	0.621504	0.627073
sp|Q9ERS5|PKHA2_MOUSE	Q9ERS5	PKHA2_MOUSE	Plekha2	Pleckstrin homology domain-containing family A member 2	0.916303	-0.126103	0.621518	0.627073
sp|Q9D0S9|HINT2_MOUSE	Q9D0S9	HINT2_MOUSE	Hint2	Histidine triad nucleotide-binding protein 2, mitochondrial	0.916282	-0.126137	0.621522	0.627073
sp|Q924C1|XPO5_MOUSE	Q924C1	XPO5_MOUSE	Xpo5	Exportin-5	0.915886	-0.126761	0.621598	0.627073
sp|P32233|DRG1_MOUSE	P32233	DRG1_MOUSE	Drg1	Developmentally-regulated GTP-binding protein 1	0.915533	-0.127316	0.621665	0.627073
sp|Q9Z1N5|DX39B_MOUSE	Q9Z1N5	DX39B_MOUSE	Ddx39b	Spliceosome RNA helicase Ddx39b	0.915187	-0.127861	0.62173	0.627073
sp|Q9CQ75|NDUA2_MOUSE	Q9CQ75	NDUA2_MOUSE	Ndufa2	NADH dehydrogenase [ubiquinone] 1 alpha subcomplex subunit 2	0.914683	-0.128656	0.621825	0.627073
sp|P58281|OPA1_MOUSE	P58281	OPA1_MOUSE	Opa1	Dynamin-like 120 kDa protein, mitochondrial	0.914635	-0.128732	0.621834	0.627073
sp|Q61881|MCM7_MOUSE	Q61881	MCM7_MOUSE	Mcm7	DNA replication licensing factor MCM7	0.914318	-0.129233	0.621893	0.627073
sp|Q91WK2|EIF3H_MOUSE	Q91WK2	EIF3H_MOUSE	Eif3h	Eukaryotic translation initiation factor 3 subunit H	0.913758	-0.130116	0.621996	0.627073
sp|Q8C3Y4|KNTC1_MOUSE	Q8C3Y4	KNTC1_MOUSE	Kntc1	Kinetochore-associated protein 1	0.913683	-0.130235	0.62201	0.627073
sp|Q60865|CAPR1_MOUSE	Q60865	CAPR1_MOUSE	Caprin1	Caprin-1	0.913247	-0.130922	0.62209	0.627073
sp|Q99JF5|MVD1_MOUSE	Q99JF5	MVD1_MOUSE	Mvd	Diphosphomevalonate decarboxylase	0.913196	-0.131004	0.622099	0.627073
sp|P07742|RIR1_MOUSE	P07742	RIR1_MOUSE	Rrm1	Ribonucleoside-diphosphate reductase large subunit	0.912753	-0.131704	0.622179	0.627073
sp|P47811|MK14_MOUSE	P47811	MK14_MOUSE	Mapk14	Mitogen-activated protein kinase 14	0.91214	-0.132673	0.62229	0.627073
sp|P80318|TCPG_MOUSE	P80318	TCPG_MOUSE	Cct3	T-complex protein 1 subunit gamma	0.911419	-0.133814	0.622418	0.627073
sp|P30416|FKBP4_MOUSE	P30416	FKBP4_MOUSE	Fkbp4	Peptidyl-prolyl cis-trans isomerase FKBP4	0.911182	-0.134189	0.622459	0.627073
sp|Q8BTS4|NUP54_MOUSE	Q8BTS4	NUP54_MOUSE	Nup54	Nuclear pore complex protein Nup54	0.910205	-0.135737	0.62263	0.627073
sp|Q91YR7|PRP6_MOUSE	Q91YR7	PRP6_MOUSE	Prpf6	Pre-mRNA-processing factor 6	0.909865	-0.136276	0.622688	0.627073
sp|Q922U2|K2C5_MOUSE	Q922U2	K2C5_MOUSE	Krt5	Keratin, type II cytoskeletal 5	0.908069	-0.139126	0.622992	0.627073
sp|P02469|LAMB1_MOUSE	P02469	LAMB1_MOUSE	Lamb1	Laminin subunit beta-1	0.908024	-0.139197	0.622999	0.627073
sp|P12960|CNTN1_MOUSE	P12960	CNTN1_MOUSE	Cntn1	Contactin-1	0.908011	-0.139218	0.623001	0.627073
sp|Q68FL6|SYMC_MOUSE	Q68FL6	SYMC_MOUSE	Mars	Methionine--tRNA ligase, cytoplasmic	0.90782	-0.139522	0.623033	0.627073
sp|P51174|ACADL_MOUSE	P51174	ACADL_MOUSE	Acadl	Long-chain specific acyl-CoA dehydrogenase, mitochondrial	0.907778	-0.139589	0.62304	0.627073
sp|Q60649|CLPB_MOUSE	Q60649	CLPB_MOUSE	Clpb	Caseinolytic peptidase B protein homolog	0.907637	-0.139813	0.623063	0.627073
sp|Q9D0T1|NH2L1_MOUSE	Q9D0T1	NH2L1_MOUSE	Nhp2l1	NHP2-like protein 1	0.907404	-0.140184	0.623102	0.627073
sp|P29351|PTN6_MOUSE	P29351	PTN6_MOUSE	Ptpn6	Tyrosine-protein phosphatase non-receptor type 6	0.906575	-0.141501	0.623236	0.627073
sp|Q9D2D7|ZN687_MOUSE	Q9D2D7	ZN687_MOUSE	Znf687	Zinc finger protein 687	0.905834	-0.142681	0.623355	0.627073
sp|Q02257|PLAK_MOUSE	Q02257	PLAK_MOUSE	Jup	Junction plakoglobin	0.904924	-0.144131	0.623498	0.627073
sp|Q8C0T5|SI1L1_MOUSE	Q8C0T5	SI1L1_MOUSE	Sipa1l1	Signal-induced proliferation-associated 1-like protein 1	0.904644	-0.144579	0.623542	0.627073
sp|Q9DBG6|RPN2_MOUSE	Q9DBG6	RPN2_MOUSE	Rpn2	Dolichyl-diphosphooligosaccharide--protein glycosyltransferase subunit 2	0.904369	-0.145017	0.623585	0.627073
sp|Q9CPR5|RM15_MOUSE	Q9CPR5	RM15_MOUSE	Mrpl15	39S ribosomal protein L15, mitochondrial	0.903682	-0.146114	0.62369	0.627073
sp|Q9D7N6|RM30_MOUSE	Q9D7N6	RM30_MOUSE	Mrpl30	39S ribosomal protein L30, mitochondrial	0.902903	-0.147358	0.623807	0.627073
sp|P47757-2|CAPZB_MOUSE	P47757-2	CAPZB_MOUSE	Capzb	Isoform 2 of F-actin-capping protein subunit beta	0.902482	-0.14803	0.62387	0.627073
sp|Q3TBW2|RM10_MOUSE	Q3TBW2	RM10_MOUSE	Mrpl10	39S ribosomal protein L10, mitochondrial	0.901935	-0.148905	0.623951	0.627073
sp|Q8BH24|TM9S4_MOUSE	Q8BH24	TM9S4_MOUSE	Tm9sf4	Transmembrane 9 superfamily member 4	0.901756	-0.149191	0.623977	0.627073
sp|Q6PGF7|EXOC8_MOUSE	Q6PGF7	EXOC8_MOUSE	Exoc8	Exocyst complex component 8	0.901437	-0.149702	0.624023	0.627073
sp|Q91V12|BACH_MOUSE	Q91V12	BACH_MOUSE	Acot7	Cytosolic acyl coenzyme A thioester hydrolase	0.901333	-0.149867	0.624038	0.627073
sp|P16460|ASSY_MOUSE	P16460	ASSY_MOUSE	Ass1	Argininosuccinate synthase	0.90092	-0.150529	0.624098	0.627073
sp|Q8K013|GTPBA_MOUSE	Q8K013	GTPBA_MOUSE	Gtpbp10	GTP-binding protein 10	0.899984	-0.152029	0.62423	0.627073
sp|Q9CQF0|RM11_MOUSE	Q9CQF0	RM11_MOUSE	Mrpl11	39S ribosomal protein L11, mitochondrial	0.899348	-0.153049	0.624319	0.627073
sp|Q5SSK3|TEFM_MOUSE	Q5SSK3	TEFM_MOUSE	Tefm	Transcription elongation factor, mitochondrial	0.899242	-0.153218	0.624333	0.627073
sp|Q99MR8|MCCA_MOUSE	Q99MR8	MCCA_MOUSE	Mccc1	Methylcrotonoyl-CoA carboxylase subunit alpha, mitochondrial	0.899046	-0.153534	0.62436	0.627073
sp|P61804|DAD1_MOUSE	P61804	DAD1_MOUSE	Dad1	Dolichyl-diphosphooligosaccharide--protein glycosyltransferase subunit DAD1	0.898519	-0.154379	0.624432	0.627073
tr|Q5XJF6|Q5XJF6_MOUSE	Q5XJF6	Q5XJF6_MOUSE	Rpl10a	Ribosomal protein	0.898477	-0.154447	0.624438	0.627073
sp|O08759|UBE3A_MOUSE	O08759	UBE3A_MOUSE	Ube3a	Ubiquitin-protein ligase E3A	0.897839	-0.155471	0.624523	0.627073
sp|Q8C3X4|GUF1_MOUSE	Q8C3X4	GUF1_MOUSE	Guf1	Translation factor Guf1, mitochondrial	0.89726	-0.156402	0.6246	0.627073
sp|Q8BFZ9|ERLN2_MOUSE	Q8BFZ9	ERLN2_MOUSE	Erlin2	Erlin-2	0.897182	-0.156527	0.62461	0.627073
sp|Q80TJ7|PHF8_MOUSE	Q80TJ7	PHF8_MOUSE	Phf8	Histone lysine demethylase PHF8	0.896746	-0.157229	0.624667	0.627073
sp|P20152|VIME_MOUSE	P20152	VIME_MOUSE	Vim	Vimentin	0.896252	-0.158023	0.62473	0.627073
sp|Q9CZN8|GATA_MOUSE	Q9CZN8	GATA_MOUSE	Qrsl1	Glutamyl-tRNA(Gln) amidotransferase subunit A, mitochondrial	0.895649	-0.158995	0.624806	0.627073
sp|Q9WVM1|RGAP1_MOUSE	Q9WVM1	RGAP1_MOUSE	Racgap1	Rac GTPase-activating protein 1	0.894927	-0.160158	0.624896	0.627073
sp|P25444|RS2_MOUSE	P25444	RS2_MOUSE	Rps2	40S ribosomal protein S2	0.893347	-0.162707	0.625087	0.627073
sp|O70311|NMT2_MOUSE	O70311	NMT2_MOUSE	Nmt2	Glycylpeptide N-tetradecanoyltransferase 2	0.892789	-0.163609	0.625153	0.627073
sp|O54879|HMGB3_MOUSE	O54879	HMGB3_MOUSE	Hmgb3	High mobility group protein B3	0.892505	-0.164067	0.625185	0.627073
sp|Q8CGC7|SYEP_MOUSE	Q8CGC7	SYEP_MOUSE	Eprs	Bifunctional glutamate/proline--tRNA ligase	0.892485	-0.164101	0.625188	0.627073
sp|Q61495|DSG1A_MOUSE	Q61495	DSG1A_MOUSE	Dsg1a	Desmoglein-1-alpha	0.891403	-0.16585	0.62531	0.627073
sp|Q9Z1T1|AP3B1_MOUSE	Q9Z1T1	AP3B1_MOUSE	Ap3b1	AP-3 complex subunit beta-1	0.889303	-0.169253	0.625537	0.627073
sp|Q9D4H1|EXOC2_MOUSE	Q9D4H1	EXOC2_MOUSE	Exoc2	Exocyst complex component 2	0.889293	-0.169269	0.625538	0.627073
sp|Q7TMB8|CYFP1_MOUSE	Q7TMB8	CYFP1_MOUSE	Cyfip1	Cytoplasmic FMR1-interacting protein 1	0.888802	-0.170066	0.625589	0.627073
sp|Q9Z110|P5CS_MOUSE	Q9Z110	P5CS_MOUSE	Aldh18a1	Delta-1-pyrroline-5-carboxylate synthase	0.888736	-0.170174	0.625596	0.627073
sp|Q80SW1|SAHH2_MOUSE	Q80SW1	SAHH2_MOUSE	Ahcyl1	Putative adenosylhomocysteinase 2	0.888137	-0.171146	0.625656	0.627073
sp|Q99JB2|STML2_MOUSE	Q99JB2	STML2_MOUSE	Stoml2	Stomatin-like protein 2, mitochondrial	0.887594	-0.172027	0.62571	0.627073
sp|Q61655|DD19A_MOUSE	Q61655	DD19A_MOUSE	Ddx19a	ATP-dependent RNA helicase DDX19A	0.887453	-0.172258	0.625724	0.627073
sp|Q6A009|LTN1_MOUSE	Q6A009	LTN1_MOUSE	Ltn1	E3 ubiquitin-protein ligase listerin	0.887396	-0.17235	0.62573	0.627073
sp|P54103|DNJC2_MOUSE	P54103	DNJC2_MOUSE	Dnajc2	DnaJ homolog subfamily C member 2	0.886399	-0.173972	0.625826	0.627073
sp|Q8BW10|NOB1_MOUSE	Q8BW10	NOB1_MOUSE	Nob1	RNA-binding protein NOB1	0.885887	-0.174805	0.625873	0.627073
sp|Q921H8|THIKA_MOUSE	Q921H8	THIKA_MOUSE	Acaa1a	3-ketoacyl-CoA thiolase A, peroxisomal	0.885791	-0.174962	0.625882	0.627073
sp|P27612|PLAP_MOUSE	P27612	PLAP_MOUSE	Plaa	Phospholipase A-2-activating protein	0.885592	-0.175287	0.625901	0.627073
sp|Q3ULF4|SPG7_MOUSE	Q3ULF4	SPG7_MOUSE	Spg7	Paraplegin	0.885467	-0.175489	0.625912	0.627073
sp|Q99LC8|EI2BA_MOUSE	Q99LC8	EI2BA_MOUSE	Eif2b1	Translation initiation factor eIF-2B subunit alpha	0.885325	-0.17572	0.625925	0.627073
sp|P10639|THIO_MOUSE	P10639	THIO_MOUSE	Txn	Thioredoxin	0.885236	-0.175866	0.625933	0.627073
sp|Q9DC70|NDUS7_MOUSE	Q9DC70	NDUS7_MOUSE	Ndufs7	NADH dehydrogenase [ubiquinone] iron-sulfur protein 7, mitochondrial	0.88377	-0.178257	0.626062	0.627073
sp|P00375|DYR_MOUSE	P00375	DYR_MOUSE	Dhfr	Dihydrofolate reductase	0.882995	-0.179523	0.626127	0.627073
sp|Q9EQU5|SET_MOUSE	Q9EQU5	SET_MOUSE	Set	Protein SET	0.882315	-0.180635	0.626182	0.627073
sp|P52624|UPP1_MOUSE	P52624	UPP1_MOUSE	Upp1	Uridine phosphorylase 1	0.881888	-0.181332	0.626216	0.627073
sp|Q9DC61|MPPA_MOUSE	Q9DC61	MPPA_MOUSE	Pmpca	Mitochondrial-processing peptidase subunit alpha	0.881665	-0.181697	0.626233	0.627073
sp|Q91YE6|IPO9_MOUSE	Q91YE6	IPO9_MOUSE	Ipo9	Importin-9	0.881227	-0.182414	0.626267	0.627073
sp|Q9CZM2|RL15_MOUSE	Q9CZM2	RL15_MOUSE	Rpl15	60S ribosomal protein L15	0.881024	-0.182746	0.626283	0.627073
sp|O55125|NIPS1_MOUSE	O55125	NIPS1_MOUSE	Nipsnap1	Protein NipSnap homolog 1	0.88086	-0.183015	0.626295	0.627073
sp|Q8C0P0|GWL_MOUSE	Q8C0P0	GWL_MOUSE	Mastl	Serine/threonine-protein kinase greatwall	0.880684	-0.183304	0.626308	0.627073
sp|Q9WTI7|MYO1C_MOUSE	Q9WTI7	MYO1C_MOUSE	Myo1c	Unconventional myosin-Ic	0.880583	-0.183469	0.626316	0.627073
sp|P18654|KS6A3_MOUSE	P18654	KS6A3_MOUSE	Rps6ka3	Ribosomal protein S6 kinase alpha-3	0.880154	-0.184171	0.626347	0.627073
sp|P28740|KIF2A_MOUSE	P28740	KIF2A_MOUSE	Kif2a	Kinesin-like protein KIF2A	0.880012	-0.184405	0.626357	0.627073
sp|Q9R0L6|PCM1_MOUSE	Q9R0L6	PCM1_MOUSE	Pcm1	Pericentriolar material 1 protein	0.879807	-0.184741	0.626372	0.627073
sp|Q8K019|BCLF1_MOUSE	Q8K019	BCLF1_MOUSE	Bclaf1	Bcl-2-associated transcription factor 1	0.87919	-0.185753	0.626415	0.627073
sp|Q99N95|RM03_MOUSE	Q99N95	RM03_MOUSE	Mrpl3	39S ribosomal protein L3, mitochondrial	0.878858	-0.186297	0.626438	0.627073
sp|Q99N87|RT05_MOUSE	Q99N87	RT05_MOUSE	Mrps5	28S ribosomal protein S5, mitochondrial	0.877936	-0.187812	0.626499	0.627073
sp|Q9CR95|NECP1_MOUSE	Q9CR95	NECP1_MOUSE	Necap1	Adaptin ear-binding coat-associated protein 1	0.877718	-0.18817	0.626513	0.627073
sp|Q9Z1Z2|STRAP_MOUSE	Q9Z1Z2	STRAP_MOUSE	Strap	Serine-threonine kinase receptor-associated protein	0.877487	-0.188551	0.626528	0.627073
sp|Q03145|EPHA2_MOUSE	Q03145	EPHA2_MOUSE	Epha2	Ephrin type-A receptor 2	0.877175	-0.189064	0.626548	0.627073
sp|Q8BGH2|SAM50_MOUSE	Q8BGH2	SAM50_MOUSE	Samm50	Sorting and assembly machinery component 50 homolog	0.876457	-0.190245	0.626591	0.627073
sp|Q8JZK9|HMCS1_MOUSE	Q8JZK9	HMCS1_MOUSE	Hmgcs1	Hydroxymethylglutaryl-CoA synthase, cytoplasmic	0.875862	-0.191225	0.626626	0.627073
sp|Q9CZW4|ACSL3_MOUSE	Q9CZW4	ACSL3_MOUSE	Acsl3	Long-chain-fatty-acid--CoA ligase 3	0.875684	-0.191517	0.626636	0.627073
sp|Q8C0D5|ETUD1_MOUSE	Q8C0D5	ETUD1_MOUSE	Eftud1	Elongation factor Tu GTP-binding domain-containing protein 1	0.875557	-0.191727	0.626643	0.627073
sp|Q8BWY3|ERF1_MOUSE	Q8BWY3	ERF1_MOUSE	Etf1	Eukaryotic peptide chain release factor subunit 1	0.875299	-0.192152	0.626657	0.627073
sp|A2AUU0|METL8_MOUSE	A2AUU0	METL8_MOUSE	Mettl8	Methyltransferase-like protein 8	0.875151	-0.192396	0.626666	0.627073
sp|Q6ZQ08|CNOT1_MOUSE	Q6ZQ08	CNOT1_MOUSE	Cnot1	CCR4-NOT transcription complex subunit 1	0.87469	-0.193157	0.62669	0.627073
sp|Q9D1P4|CHRD1_MOUSE	Q9D1P4	CHRD1_MOUSE	Chordc1	Cysteine and histidine-rich domain-containing protein 1	0.874409	-0.19362	0.626705	0.627073
sp|P23475|XRCC6_MOUSE	P23475	XRCC6_MOUSE	Xrcc6	X-ray repair cross-complementing protein 6	0.874122	-0.194094	0.62672	0.627073
sp|Q9R1J0|NSDHL_MOUSE	Q9R1J0	NSDHL_MOUSE	Nsdhl	Sterol-4-alpha-carboxylate 3-dehydrogenase, decarboxylating	0.873121	-0.195747	0.626769	0.627073
sp|Q04750|TOP1_MOUSE	Q04750	TOP1_MOUSE	Top1	DNA topoisomerase 1	0.872554	-0.196684	0.626795	0.627073
sp|O35425|BOK_MOUSE	O35425	BOK_MOUSE	Bok	Bcl-2-related ovarian killer protein	0.87198	-0.197633	0.626821	0.627073
sp|Q8R3F5|FABD_MOUSE	Q8R3F5	FABD_MOUSE	Mcat	Malonyl-CoA-acyl carrier protein transacylase, mitochondrial	0.871274	-0.198802	0.62685	0.627073
sp|Q9JLB0-2|MPP6_MOUSE	Q9JLB0-2	MPP6_MOUSE	Mpp6	Isoform Alpha of MAGUK p55 subfamily member 6	0.8712	-0.198924	0.626853	0.627073
sp|P52825|CPT2_MOUSE	P52825	CPT2_MOUSE	Cpt2	Carnitine O-palmitoyltransferase 2, mitochondrial	0.870823	-0.199548	0.626868	0.627073
sp|P48760|FOLC_MOUSE	P48760	FOLC_MOUSE	Fpgs	Folylpolyglutamate synthase, mitochondrial	0.870341	-0.200348	0.626887	0.627073
sp|Q9D0M5|DYL2_MOUSE	Q9D0M5	DYL2_MOUSE	Dynll2	Dynein light chain 2, cytoplasmic	0.869348	-0.201994	0.626922	0.627073
sp|Q99PS0|K1C23_MOUSE	Q99PS0	K1C23_MOUSE	Krt23	Keratin, type I cytoskeletal 23	0.868525	-0.203361	0.626948	0.627073
sp|Q9R0X4|ACOT9_MOUSE	Q9R0X4	ACOT9_MOUSE	Acot9	Acyl-coenzyme A thioesterase 9, mitochondrial	0.868507	-0.20339	0.626949	0.627073
sp|P51863|VA0D1_MOUSE	P51863	VA0D1_MOUSE	Atp6v0d1	V-type proton ATPase subunit d 1	0.867944	-0.204326	0.626965	0.627073
sp|Q8BMA6|SRP68_MOUSE	Q8BMA6	SRP68_MOUSE	Srp68	Signal recognition particle subunit SRP68	0.867875	-0.204441	0.626967	0.627073
sp|Q9DBG7|SRPR_MOUSE	Q9DBG7	SRPR_MOUSE	Srpr	Signal recognition particle receptor subunit alpha	0.867182	-0.205593	0.626986	0.627073
sp|Q9CWT6|DDX28_MOUSE	Q9CWT6	DDX28_MOUSE	Ddx28	Probable ATP-dependent RNA helicase DDX28	0.866223	-0.207189	0.627008	0.627073
sp|Q640Q5|PAN3_MOUSE	Q640Q5	PAN3_MOUSE	Pan3	PAB-dependent poly(A)-specific ribonuclease subunit PAN3	0.865664	-0.208121	0.62702	0.627073
sp|Q99LJ1|FUCO_MOUSE	Q99LJ1	FUCO_MOUSE	Fuca1	Tissue alpha-L-fucosidase	0.864895	-0.209403	0.627034	0.627073
sp|Q6ZWN5|RS9_MOUSE	Q6ZWN5	RS9_MOUSE	Rps9	40S ribosomal protein S9	0.864484	-0.210089	0.627041	0.627073
sp|Q8CAQ8|IMMT_MOUSE	Q8CAQ8	IMMT_MOUSE	Immt	Mitochondrial inner membrane protein	0.864274	-0.210439	0.627044	0.627073
sp|Q9D287|SPF27_MOUSE	Q9D287	SPF27_MOUSE	Bcas2	Pre-mRNA-splicing factor SPF27	0.864187	-0.210585	0.627045	0.627073
sp|Q9Z2I8|SUCB2_MOUSE	Q9Z2I8	SUCB2_MOUSE	Suclg2	Succinyl-CoA ligase [GDP-forming] subunit beta, mitochondrial	0.863754	-0.211308	0.627051	0.627073
sp|Q8R5H1|UBP15_MOUSE	Q8R5H1	UBP15_MOUSE	Usp15	Ubiquitin carboxyl-terminal hydrolase 15	0.862925	-0.212694	0.62706	0.627073
tr|G3X9N6|G3X9N6_MOUSE	G3X9N6	G3X9N6_MOUSE	Osbpl8	Oxysterol-binding protein	0.861428	-0.215197	0.627071	0.627073
sp|Q64467|G3PT_MOUSE	Q64467	G3PT_MOUSE	Gapdhs	Glyceraldehyde-3-phosphate dehydrogenase, testis-specific	0.861386	-0.215268	0.627071	0.627073
sp|Q8R2K4|TAF6L_MOUSE	Q8R2K4	TAF6L_MOUSE	Taf6l	TAF6-like RNA polymerase II p300/CBP-associated factor-associated factor 65 kDa subunit 6L	0.860952	-0.215995	0.627072	0.627073
sp|Q8R1U1|COG4_MOUSE	Q8R1U1	COG4_MOUSE	Cog4	Conserved oligomeric Golgi complex subunit 4	0.860744	-0.216344	0.627072	0.627073
sp|P11087|CO1A1_MOUSE	P11087	CO1A1_MOUSE	Col1a1	Collagen alpha-1(I) chain	0.860621	-0.21655	0.627073	0.627073
sp|P29758|OAT_MOUSE	P29758	OAT_MOUSE	Oat	Ornithine aminotransferase, mitochondrial	0.859995	-0.217599	0.627072	0.627073
sp|Q61165|SL9A1_MOUSE	Q61165	SL9A1_MOUSE	Slc9a1	Sodium/hydrogen exchanger 1	0.859763	-0.217989	0.627072	0.627073
sp|Q8BKF1|RPOM_MOUSE	Q8BKF1	RPOM_MOUSE	Polrmt	DNA-directed RNA polymerase, mitochondrial	0.85941	-0.218582	0.627071	0.627073
sp|Q61696|HS71A_MOUSE	Q61696	HS71A_MOUSE	Hspa1a	Heat shock 70 kDa protein 1A	0.859274	-0.21881	0.62707	0.627073
sp|Q8BT07|CEP55_MOUSE	Q8BT07	CEP55_MOUSE	Cep55	Centrosomal protein of 55 kDa	0.859206	-0.218924	0.62707	0.627073
sp|Q9EQI8|RM46_MOUSE	Q9EQI8	RM46_MOUSE	Mrpl46	39S ribosomal protein L46, mitochondrial	0.859161	-0.218999	0.62707	0.627073
sp|Q8K2Z4|CND1_MOUSE	Q8K2Z4	CND1_MOUSE	Ncapd2	Condensin complex subunit 1	0.858781	-0.219637	0.627068	0.627073
sp|Q99LC3|NDUAA_MOUSE	Q99LC3	NDUAA_MOUSE	Ndufa10	NADH dehydrogenase [ubiquinone] 1 alpha subcomplex subunit 10, mitochondrial	0.858581	-0.219975	0.627066	0.627073
sp|Q6RT24|CENPE_MOUSE	Q6RT24	CENPE_MOUSE	Cenpe	Centromere-associated protein E	0.858449	-0.220195	0.627065	0.627073
tr|F7BPW6|F7BPW6_MOUSE	F7BPW6	F7BPW6_MOUSE	Sec16a	Protein Sec16a (Fragment)	0.857868	-0.221173	0.627061	0.627073
sp|Q8VE38|OXND1_MOUSE	Q8VE38	OXND1_MOUSE	Oxnad1	Oxidoreductase NAD-binding domain-containing protein 1	0.857758	-0.221357	0.627059	0.627073
tr|Q3TJW2|Q3TJW2_MOUSE	Q3TJW2	Q3TJW2_MOUSE	Fbxo15	F-box only protein 15	0.85726	-0.222195	0.627054	0.627073
tr|Q91X76|Q91X76_MOUSE	Q91X76	Q91X76_MOUSE	Nt5dc2	5'-nucleotidase domain containing 2	0.856714	-0.223115	0.627047	0.627073
sp|Q3UHD6|SNX27_MOUSE	Q3UHD6	SNX27_MOUSE	Snx27	Sorting nexin-27	0.856696	-0.223145	0.627047	0.627073
sp|Q99LE6|ABCF2_MOUSE	Q99LE6	ABCF2_MOUSE	Abcf2	ATP-binding cassette sub-family F member 2	0.85667	-0.223189	0.627046	0.627073
sp|Q9EPL8|IPO7_MOUSE	Q9EPL8	IPO7_MOUSE	Ipo7	Importin-7	0.856239	-0.223914	0.62704	0.627073
sp|Q8R3Y8|I2BP1_MOUSE	Q8R3Y8	I2BP1_MOUSE	Irf2bp1	Interferon regulatory factor 2-binding protein 1	0.855737	-0.22476	0.627031	0.627073
sp|Q9DCU6|RM04_MOUSE	Q9DCU6	RM04_MOUSE	Mrpl4	39S ribosomal protein L4, mitochondrial	0.854949	-0.22609	0.627016	0.627073
sp|Q9WV55|VAPA_MOUSE	Q9WV55	VAPA_MOUSE	Vapa	Vesicle-associated membrane protein-associated protein A	0.854011	-0.227674	0.626995	0.627073
sp|Q9CR16|PPID_MOUSE	Q9CR16	PPID_MOUSE	Ppid	Peptidyl-prolyl cis-trans isomerase D	0.853901	-0.227859	0.626992	0.627073
sp|Q61753|SERA_MOUSE	Q61753	SERA_MOUSE	Phgdh	D-3-phosphoglycerate dehydrogenase	0.853735	-0.228139	0.626988	0.627073
sp|Q63844|MK03_MOUSE	Q63844	MK03_MOUSE	Mapk3	Mitogen-activated protein kinase 3	0.853	-0.229383	0.626968	0.627073
sp|Q8BX02|KANK2_MOUSE	Q8BX02	KANK2_MOUSE	Kank2	KN motif and ankyrin repeat domain-containing protein 2	0.85204	-0.231007	0.626939	0.627073
sp|Q6ZQB6|VIP2_MOUSE	Q6ZQB6	VIP2_MOUSE	Ppip5k2	Inositol hexakisphosphate and diphosphoinositol-pentakisphosphate kinase 2	0.852011	-0.231056	0.626938	0.627073
tr|Q80X98|Q80X98_MOUSE	Q80X98	Q80X98_MOUSE	Dhx38	DEAH (Asp-Glu-Ala-His) box polypeptide 38	0.851609	-0.231737	0.626925	0.627073
sp|Q8BG51|MIRO1_MOUSE	Q8BG51	MIRO1_MOUSE	Rhot1	Mitochondrial Rho GTPase 1	0.851574	-0.231796	0.626923	0.627073
sp|Q9Z2T6|KRT85_MOUSE	Q9Z2T6	KRT85_MOUSE	Krt85	Keratin, type II cuticular Hb5	0.851455	-0.231998	0.626919	0.627073
sp|Q9R0Q6|ARC1A_MOUSE	Q9R0Q6	ARC1A_MOUSE	Arpc1a	Actin-related protein 2/3 complex subunit 1A	0.85109	-0.232616	0.626906	0.627073
sp|Q8K1R7|NEK9_MOUSE	Q8K1R7	NEK9_MOUSE	Nek9	Serine/threonine-protein kinase Nek9	0.850109	-0.23428	0.626869	0.627073
sp|Q922J9|FACR1_MOUSE	Q922J9	FACR1_MOUSE	Far1	Fatty acyl-CoA reductase 1	0.850102	-0.234292	0.626869	0.627073
sp|Q61176|ARGI1_MOUSE	Q61176	ARGI1_MOUSE	Arg1	Arginase-1	0.850043	-0.234393	0.626867	0.627073
sp|O70554|SPR2B_MOUSE	O70554	SPR2B_MOUSE	Sprr2b	Small proline-rich protein 2B	0.850014	-0.234441	0.626866	0.627073
sp|Q921F4|HNRLL_MOUSE	Q921F4	HNRLL_MOUSE	Hnrnpll	Heterogeneous nuclear ribonucleoprotein L-like	0.849116	-0.235966	0.626828	0.627073
sp|Q8K1J6|TRNT1_MOUSE	Q8K1J6	TRNT1_MOUSE	Trnt1	CCA tRNA nucleotidyltransferase 1, mitochondrial	0.849015	-0.236138	0.626823	0.627073
sp|P19096|FAS_MOUSE	P19096	FAS_MOUSE	Fasn	Fatty acid synthase	0.848688	-0.236694	0.626809	0.627073
sp|P80316|TCPE_MOUSE	P80316	TCPE_MOUSE	Cct5	T-complex protein 1 subunit epsilon	0.848441	-0.237113	0.626797	0.627073
sp|P40694|SMBP2_MOUSE	P40694	SMBP2_MOUSE	Ighmbp2	DNA-binding protein SMUBP-2	0.848391	-0.237199	0.626795	0.627073
sp|Q91VT4|CBR4_MOUSE	Q91VT4	CBR4_MOUSE	Cbr4	Carbonyl reductase family member 4	0.848319	-0.237321	0.626792	0.627073
sp|Q9D7H3|RTCA_MOUSE	Q9D7H3	RTCA_MOUSE	RtcA	RNA 3'-terminal phosphate cyclase	0.848232	-0.237469	0.626788	0.627073
sp|Q8C166|CPNE1_MOUSE	Q8C166	CPNE1_MOUSE	Cpne1	Copine-1	0.84747	-0.238765	0.626751	0.627073
sp|Q62432|SMAD2_MOUSE	Q62432	SMAD2_MOUSE	Smad2	Mothers against decapentaplegic homolog 2	0.847287	-0.239078	0.626741	0.627073
sp|Q9DC69|NDUA9_MOUSE	Q9DC69	NDUA9_MOUSE	Ndufa9	NADH dehydrogenase [ubiquinone] 1 alpha subcomplex subunit 9, mitochondrial	0.846367	-0.240644	0.626693	0.627073
sp|Q9Z2Z9|GFPT2_MOUSE	Q9Z2Z9	GFPT2_MOUSE	Gfpt2	Glutamine--fructose-6-phosphate aminotransferase [isomerizing] 2	0.846199	-0.24093	0.626683	0.627073
sp|Q3TCH7|CUL4A_MOUSE	Q3TCH7	CUL4A_MOUSE	Cul4a	Cullin-4A	0.843706	-0.245188	0.626533	0.627073
sp|Q80YD1|SUV3_MOUSE	Q80YD1	SUV3_MOUSE	Supv3l1	ATP-dependent RNA helicase SUPV3L1, mitochondrial	0.843639	-0.245302	0.626529	0.627073
sp|P31001|DESM_MOUSE	P31001	DESM_MOUSE	Des	Desmin	0.843323	-0.245843	0.626508	0.627073
sp|Q3TTY5|K22E_MOUSE	Q3TTY5	K22E_MOUSE	Krt2	Keratin, type II cytoskeletal 2 epidermal	0.843311	-0.245864	0.626507	0.627073
sp|Q9Z2U2|ZN292_MOUSE	Q9Z2U2	ZN292_MOUSE	Zfp292	Zinc finger protein 292	0.842813	-0.246716	0.626473	0.627073
sp|Q99PM9|UCK2_MOUSE	Q99PM9	UCK2_MOUSE	Uck2	Uridine-cytidine kinase 2	0.842244	-0.247689	0.626433	0.627073
sp|Q62077|PLCG1_MOUSE	Q62077	PLCG1_MOUSE	Plcg1	1-phosphatidylinositol 4,5-bisphosphate phosphodiesterase gamma-1	0.841885	-0.248304	0.626408	0.627073
sp|Q9CY73|RM44_MOUSE	Q9CY73	RM44_MOUSE	Mrpl44	39S ribosomal protein L44, mitochondrial	0.841486	-0.248988	0.626378	0.627073
sp|Q9QZ06|TOLIP_MOUSE	Q9QZ06	TOLIP_MOUSE	Tollip	Toll-interacting protein	0.841385	-0.249162	0.626371	0.627073
sp|P13439|UMPS_MOUSE	P13439	UMPS_MOUSE	Umps	Uridine 5'-monophosphate synthase	0.841281	-0.24934	0.626363	0.627073
sp|Q8BYL4|SYYM_MOUSE	Q8BYL4	SYYM_MOUSE	Yars2	Tyrosine--tRNA ligase, mitochondrial	0.840899	-0.249996	0.626334	0.627073
sp|Q91VJ4|STK38_MOUSE	Q91VJ4	STK38_MOUSE	Stk38	Serine/threonine-protein kinase 38	0.840101	-0.251366	0.626272	0.627073
sp|Q8K2B3|DHSA_MOUSE	Q8K2B3	DHSA_MOUSE	Sdha	Succinate dehydrogenase [ubiquinone] flavoprotein subunit, mitochondrial	0.839775	-0.251925	0.626245	0.627073
sp|Q8JZY4|MRRP3_MOUSE	Q8JZY4	MRRP3_MOUSE	Kiaa0391	Mitochondrial ribonuclease P protein 3	0.839089	-0.253105	0.626189	0.627073
sp|P28667|MRP_MOUSE	P28667	MRP_MOUSE	Marcksl1	MARCKS-related protein	0.839077	-0.253126	0.626188	0.627073
sp|Q8BMD8|SCMC1_MOUSE	Q8BMD8	SCMC1_MOUSE	Slc25a24	Calcium-binding mitochondrial carrier protein SCaMC-1	0.838669	-0.253826	0.626153	0.627073
sp|Q6P3A8|ODBB_MOUSE	Q6P3A8	ODBB_MOUSE	Bckdhb	2-oxoisovalerate dehydrogenase subunit beta, mitochondrial	0.837585	-0.255692	0.626058	0.627073
sp|O54988|SLK_MOUSE	O54988	SLK_MOUSE	Slk	STE20-like serine/threonine-protein kinase	0.836876	-0.256915	0.625993	0.627073
sp|Q9CQC7|NDUB4_MOUSE	Q9CQC7	NDUB4_MOUSE	Ndufb4	NADH dehydrogenase [ubiquinone] 1 beta subcomplex subunit 4	0.835948	-0.258515	0.625905	0.627073
sp|Q99KR3|LACB2_MOUSE	Q99KR3	LACB2_MOUSE	Lactb2	Beta-lactamase-like protein 2	0.83586	-0.258666	0.625896	0.627073
tr|Q9CZN7|Q9CZN7_MOUSE	Q9CZN7	Q9CZN7_MOUSE	Shmt2	Serine hydroxymethyltransferase	0.83556	-0.259185	0.625867	0.627073
sp|Q9R1T2|SAE1_MOUSE	Q9R1T2	SAE1_MOUSE	Sae1	SUMO-activating enzyme subunit 1	0.835315	-0.259608	0.625843	0.627073
sp|Q9R0P3|ESTD_MOUSE	Q9R0P3	ESTD_MOUSE	Esd	S-formylglutathione hydrolase	0.834431	-0.261135	0.625753	0.627073
sp|P97447|FHL1_MOUSE	P97447	FHL1_MOUSE	Fhl1	Four and a half LIM domains protein 1	0.834116	-0.261679	0.62572	0.627073
sp|Q4U2R1|HERC2_MOUSE	Q4U2R1	HERC2_MOUSE	Herc2	E3 ubiquitin-protein ligase HERC2	0.834115	-0.261681	0.62572	0.627073
sp|Q8C167|PPCEL_MOUSE	Q8C167	PPCEL_MOUSE	Prepl	Prolyl endopeptidase-like	0.833939	-0.261985	0.625702	0.627073
sp|Q8VCI0|PLBL1_MOUSE	Q8VCI0	PLBL1_MOUSE	Plbd1	Phospholipase B-like 1	0.832686	-0.264156	0.625567	0.627073
sp|Q7TPC1|CDSN_MOUSE	Q7TPC1	CDSN_MOUSE	Cdsn	Corneodesmosin	0.83237	-0.264703	0.625532	0.627073
sp|P63276|RS17_MOUSE	P63276	RS17_MOUSE	Rps17	40S ribosomal protein S17	0.831968	-0.2654	0.625486	0.627073
sp|Q3UQ84|SYTM_MOUSE	Q3UQ84	SYTM_MOUSE	Tars2	Threonine--tRNA ligase, mitochondrial	0.831813	-0.265669	0.625469	0.627073
sp|Q6PIP5|NUDC1_MOUSE	Q6PIP5	NUDC1_MOUSE	Nudcd1	NudC domain-containing protein 1	0.8317	-0.265866	0.625456	0.627073
sp|P49312|ROA1_MOUSE	P49312	ROA1_MOUSE	Hnrnpa1	Heterogeneous nuclear ribonucleoprotein A1	0.831295	-0.266568	0.625409	0.627073
sp|Q05D44|IF2P_MOUSE	Q05D44	IF2P_MOUSE	Eif5b	Eukaryotic translation initiation factor 5B	0.831197	-0.266737	0.625398	0.627073
sp|P62631|EF1A2_MOUSE	P62631	EF1A2_MOUSE	Eef1a2	Elongation factor 1-alpha 2	0.830942	-0.26718	0.625368	0.627073
sp|Q8JZN5|ACAD9_MOUSE	Q8JZN5	ACAD9_MOUSE	Acad9	Acyl-CoA dehydrogenase family member 9, mitochondrial	0.830364	-0.268184	0.625299	0.627073
sp|Q61765|K1H1_MOUSE	Q61765	K1H1_MOUSE	Krt31	Keratin, type I cuticular Ha1	0.830206	-0.268459	0.62528	0.627073
sp|Q3TQQ9|CA112_MOUSE	Q3TQQ9	CA112_MOUSE	>sp|Q3TQQ9|CA112_MOUSE	Uncharacterized protein C1orf112 homolog	0.82962	-0.269477	0.625209	0.627073
sp|P80313|TCPH_MOUSE	P80313	TCPH_MOUSE	Cct7	T-complex protein 1 subunit eta	0.829491	-0.269702	0.625193	0.627073
sp|Q91YP2|NEUL_MOUSE	Q91YP2	NEUL_MOUSE	Nln	Neurolysin, mitochondrial	0.828043	-0.272222	0.625009	0.627073
sp|P47809|MP2K4_MOUSE	P47809	MP2K4_MOUSE	Map2k4	Dual specificity mitogen-activated protein kinase kinase 4	0.827798	-0.272649	0.624977	0.627073
sp|Q8CIE6|COPA_MOUSE	Q8CIE6	COPA_MOUSE	Copa	Coatomer subunit alpha	0.827034	-0.273981	0.624876	0.627073
sp|Q9Z1J3|NFS1_MOUSE	Q9Z1J3	NFS1_MOUSE	Nfs1	Cysteine desulfurase, mitochondrial	0.826936	-0.274152	0.624863	0.627073
sp|P62334|PRS10_MOUSE	P62334	PRS10_MOUSE	Psmc6	26S protease regulatory subunit 10B	0.826411	-0.275069	0.624792	0.627073
sp|Q8C2E4|PTCD1_MOUSE	Q8C2E4	PTCD1_MOUSE	Ptcd1	Pentatricopeptide repeat-containing protein 1, mitochondrial	0.826357	-0.275163	0.624784	0.627073
sp|Q60631|GRB2_MOUSE	Q60631	GRB2_MOUSE	Grb2	Growth factor receptor-bound protein 2	0.82578	-0.276171	0.624704	0.627073
sp|Q8CCK0|H2AW_MOUSE	Q8CCK0	H2AW_MOUSE	H2afy2	Core histone macro-H2A.2	0.825568	-0.276541	0.624675	0.627073
sp|P60670|NPL4_MOUSE	P60670	NPL4_MOUSE	Nploc4	Nuclear protein localization protein 4 homolog	0.82542	-0.276799	0.624654	0.627073
sp|Q99N84|RT18B_MOUSE	Q99N84	RT18B_MOUSE	Mrps18b	28S ribosomal protein S18b, mitochondrial	0.824102	-0.279105	0.624464	0.627073
sp|Q8K003|TMA7_MOUSE	Q8K003	TMA7_MOUSE	Tma7	Translation machinery-associated protein 7	0.823927	-0.279411	0.624439	0.627073
sp|P28653|PGS1_MOUSE	P28653	PGS1_MOUSE	Bgn	Biglycan	0.823711	-0.27979	0.624407	0.627073
sp|Q6GQT9|NOMO1_MOUSE	Q6GQT9	NOMO1_MOUSE	Nomo1	Nodal modulator 1	0.823657	-0.279884	0.624399	0.627073
sp|Q61578|ADRO_MOUSE	Q61578	ADRO_MOUSE	Fdxr	NADPH:adrenodoxin oxidoreductase, mitochondrial	0.823444	-0.280258	0.624367	0.627073
tr|H7BX60|H7BX60_MOUSE	H7BX60	H7BX60_MOUSE	Pot1b	Protein Pot1b	0.823289	-0.28053	0.624344	0.627073
sp|Q8BJZ4|RT35_MOUSE	Q8BJZ4	RT35_MOUSE	Mrps35	28S ribosomal protein S35, mitochondrial	0.8231	-0.280861	0.624315	0.627073
sp|Q3TDN2|FAF2_MOUSE	Q3TDN2	FAF2_MOUSE	Faf2	FAS-associated factor 2	0.822717	-0.281533	0.624257	0.627073
sp|Q8BFY9|TNPO1_MOUSE	Q8BFY9	TNPO1_MOUSE	Tnpo1	Transportin-1	0.822573	-0.281785	0.624235	0.627073
sp|Q8R3G1|PP1R8_MOUSE	Q8R3G1	PP1R8_MOUSE	Ppp1r8	Nuclear inhibitor of protein phosphatase 1	0.822169	-0.282493	0.624173	0.627073
sp|P48722|HS74L_MOUSE	P48722	HS74L_MOUSE	Hspa4l	Heat shock 70 kDa protein 4L	0.821987	-0.282813	0.624145	0.627073
sp|Q9EPU0|RENT1_MOUSE	Q9EPU0	RENT1_MOUSE	Upf1	Regulator of nonsense transcripts 1	0.821056	-0.284448	0.623998	0.627073
sp|Q8CCS6|PABP2_MOUSE	Q8CCS6	PABP2_MOUSE	Pabpn1	Polyadenylate-binding protein 2	0.820997	-0.284552	0.623989	0.627073
sp|P10518|HEM2_MOUSE	P10518	HEM2_MOUSE	Alad	Delta-aminolevulinic acid dehydratase	0.820882	-0.284754	0.62397	0.627073
sp|Q8CCP0|NEMF_MOUSE	Q8CCP0	NEMF_MOUSE	Nemf	Nuclear export mediator factor Nemf	0.820814	-0.284873	0.623959	0.627073
sp|P28474|ADHX_MOUSE	P28474	ADHX_MOUSE	Adh5	Alcohol dehydrogenase class-3	0.820712	-0.285053	0.623943	0.627073
sp|Q91WK1|SPRY4_MOUSE	Q91WK1	SPRY4_MOUSE	Spryd4	SPRY domain-containing protein 4	0.820535	-0.285364	0.623914	0.627073
sp|P62196|PRS8_MOUSE	P62196	PRS8_MOUSE	Psmc5	26S protease regulatory subunit 8	0.820492	-0.28544	0.623907	0.627073
sp|Q9CQ22|LTOR1_MOUSE	Q9CQ22	LTOR1_MOUSE	Lamtor1	Ragulator complex protein LAMTOR1	0.820403	-0.285595	0.623893	0.627073
sp|Q91YP0|L2HDH_MOUSE	Q91YP0	L2HDH_MOUSE	L2hgdh	L-2-hydroxyglutarate dehydrogenase, mitochondrial	0.81967	-0.286884	0.623773	0.627073
sp|Q60680|IKKA_MOUSE	Q60680	IKKA_MOUSE	Chuk	Inhibitor of nuclear factor kappa-B kinase subunit alpha	0.819355	-0.28744	0.62372	0.627073
sp|Q922D4|PP6R3_MOUSE	Q922D4	PP6R3_MOUSE	Ppp6r3	Serine/threonine-protein phosphatase 6 regulatory subunit 3	0.818756	-0.288494	0.62362	0.627073
sp|Q91V41|RAB14_MOUSE	Q91V41	RAB14_MOUSE	Rab14	Ras-related protein Rab-14	0.818483	-0.288975	0.623573	0.627073
sp|Q8R1B4|EIF3C_MOUSE	Q8R1B4	EIF3C_MOUSE	Eif3c	Eukaryotic translation initiation factor 3 subunit C	0.818308	-0.289284	0.623543	0.627073
sp|P26443|DHE3_MOUSE	P26443	DHE3_MOUSE	Glud1	Glutamate dehydrogenase 1, mitochondrial	0.818238	-0.289408	0.623531	0.627073
tr|E0CX20|E0CX20_MOUSE	E0CX20	E0CX20_MOUSE	Bud31	Protein BUD31 homolog	0.818207	-0.289463	0.623526	0.627073
sp|Q8VDJ3|VIGLN_MOUSE	Q8VDJ3	VIGLN_MOUSE	Hdlbp	Vigilin	0.817789	-0.2902	0.623453	0.627073
sp|O70318|E41L2_MOUSE	O70318	E41L2_MOUSE	Epb41l2	Band 4.1-like protein 2	0.816544	-0.292398	0.623234	0.627073
sp|P24369|PPIB_MOUSE	P24369	PPIB_MOUSE	Ppib	Peptidyl-prolyl cis-trans isomerase B	0.816057	-0.293259	0.623146	0.627073
sp|Q9R190|MTA2_MOUSE	Q9R190	MTA2_MOUSE	Mta2	Metastasis-associated protein MTA2	0.815802	-0.293708	0.6231	0.627073
sp|Q8BY71|HAT1_MOUSE	Q8BY71	HAT1_MOUSE	Hat1	Histone acetyltransferase type B catalytic subunit	0.815747	-0.293807	0.62309	0.627073
sp|P59325|IF5_MOUSE	P59325	IF5_MOUSE	Eif5	Eukaryotic translation initiation factor 5	0.81566	-0.29396	0.623074	0.627073
sp|Q9QXG9|TINF2_MOUSE	Q9QXG9	TINF2_MOUSE	Tinf2	TERF1-interacting nuclear factor 2	0.814621	-0.295798	0.622881	0.627073
sp|O35593|PSDE_MOUSE	O35593	PSDE_MOUSE	Psmd14	26S proteasome non-ATPase regulatory subunit 14	0.814276	-0.296411	0.622816	0.627073
sp|Q9D5K4-2|S1PBP_MOUSE	Q9D5K4-2	S1PBP_MOUSE	S100pbp	Isoform 2 of S100P-binding protein	0.814161	-0.296614	0.622794	0.627073
sp|Q3THK7|GUAA_MOUSE	Q3THK7	GUAA_MOUSE	Gmps	GMP synthase [glutamine-hydrolyzing]	0.814064	-0.296786	0.622776	0.627073
sp|Q9QXZ0|MACF1_MOUSE	Q9QXZ0	MACF1_MOUSE	Macf1	Microtubule-actin cross-linking factor 1	0.813804	-0.297246	0.622726	0.627073
sp|P62984|RL40_MOUSE	P62984	RL40_MOUSE	Uba52	Ubiquitin-60S ribosomal protein L40	0.813584	-0.297637	0.622684	0.627073
sp|P42932|TCPQ_MOUSE	P42932	TCPQ_MOUSE	Cct8	T-complex protein 1 subunit theta	0.813476	-0.297828	0.622663	0.627073
sp|Q8BT60|CPNE3_MOUSE	Q8BT60	CPNE3_MOUSE	Cpne3	Copine-3	0.812783	-0.299057	0.622529	0.627073
sp|Q9JHI5|IVD_MOUSE	Q9JHI5	IVD_MOUSE	Ivd	Isovaleryl-CoA dehydrogenase, mitochondrial	0.812268	-0.299972	0.622427	0.627073
sp|O35857|TIM44_MOUSE	O35857	TIM44_MOUSE	Timm44	Mitochondrial import inner membrane translocase subunit TIM44	0.811996	-0.300455	0.622373	0.627073
sp|P35486|ODPA_MOUSE	P35486	ODPA_MOUSE	Pdha1	Pyruvate dehydrogenase E1 component subunit alpha, somatic form, mitochondrial	0.811992	-0.300462	0.622373	0.627073
sp|Q8C156|CND2_MOUSE	Q8C156	CND2_MOUSE	Ncaph	Condensin complex subunit 2	0.811953	-0.300531	0.622365	0.627073
sp|P18572|BASI_MOUSE	P18572	BASI_MOUSE	Bsg	Basigin	0.810717	-0.302729	0.622115	0.627073
sp|Q62168|K1H2_MOUSE	Q62168	K1H2_MOUSE	Krt32	Keratin, type I cuticular Ha2	0.810512	-0.303095	0.622073	0.627073
sp|Q9DB77|QCR2_MOUSE	Q9DB77	QCR2_MOUSE	Uqcrc2	Cytochrome b-c1 complex subunit 2, mitochondrial	0.810113	-0.303804	0.621991	0.627073
sp|Q91YJ5|IF2M_MOUSE	Q91YJ5	IF2M_MOUSE	Mtif2	Translation initiation factor IF-2, mitochondrial	0.810056	-0.303907	0.621979	0.627073
sp|P14869|RLA0_MOUSE	P14869	RLA0_MOUSE	Rplp0	60S acidic ribosomal protein P0	0.809698	-0.304543	0.621904	0.627073
sp|Q02053|UBA1_MOUSE	Q02053	UBA1_MOUSE	Uba1	Ubiquitin-like modifier-activating enzyme 1	0.809023	-0.305747	0.621762	0.627073
sp|P63280|UBC9_MOUSE	P63280	UBC9_MOUSE	Ube2i	SUMO-conjugating enzyme UBC9	0.808609	-0.306486	0.621673	0.627073
sp|Q8C5Q4|GRSF1_MOUSE	Q8C5Q4	GRSF1_MOUSE	Grsf1	G-rich sequence factor 1	0.807068	-0.309238	0.621338	0.627073
sp|Q8K2Y7|RM47_MOUSE	Q8K2Y7	RM47_MOUSE	Mrpl47	39S ribosomal protein L47, mitochondrial	0.806628	-0.310025	0.62124	0.627073
sp|Q9ERG2|STRN3_MOUSE	Q9ERG2	STRN3_MOUSE	Strn3	Striatin-3	0.806185	-0.310818	0.621141	0.627073
sp|Q99LB6|MAT2B_MOUSE	Q99LB6	MAT2B_MOUSE	Mat2b	Methionine adenosyltransferase 2 subunit beta	0.804766	-0.313358	0.620817	0.627073
sp|Q8JZQ2|AFG32_MOUSE	Q8JZQ2	AFG32_MOUSE	Afg3l2	AFG3-like protein 2	0.804036	-0.314669	0.620647	0.627073
sp|Q6NZB0|DNJC8_MOUSE	Q6NZB0	DNJC8_MOUSE	Dnajc8	DnaJ homolog subfamily C member 8	0.803417	-0.315778	0.620501	0.627073
sp|P32921|SYWC_MOUSE	P32921	SYWC_MOUSE	Wars	Tryptophan--tRNA ligase, cytoplasmic	0.803387	-0.315833	0.620494	0.627073
sp|Q505D1|ANR28_MOUSE	Q505D1	ANR28_MOUSE	Ankrd28	Serine/threonine-protein phosphatase 6 regulatory ankyrin repeat subunit A	0.803161	-0.316238	0.62044	0.627073
sp|Q9D8N0|EF1G_MOUSE	Q9D8N0	EF1G_MOUSE	Eef1g	Elongation factor 1-gamma	0.803034	-0.316467	0.620409	0.627073
sp|P62192|PRS4_MOUSE	P62192	PRS4_MOUSE	Psmc1	26S protease regulatory subunit 4	0.802703	-0.317061	0.62033	0.627073
sp|Q9D1J3|SARNP_MOUSE	Q9D1J3	SARNP_MOUSE	Sarnp	SAP domain-containing ribonucleoprotein	0.802444	-0.317528	0.620267	0.627073
sp|Q9CPU0|LGUL_MOUSE	Q9CPU0	LGUL_MOUSE	Glo1	Lactoylglutathione lyase	0.80224	-0.317895	0.620218	0.627073
sp|Q9EQK7|ICMT_MOUSE	Q9EQK7	ICMT_MOUSE	Icmt	Protein-S-isoprenylcysteine O-methyltransferase	0.802158	-0.318042	0.620198	0.627073
sp|Q8BG32|PSD11_MOUSE	Q8BG32	PSD11_MOUSE	Psmd11	26S proteasome non-ATPase regulatory subunit 11	0.802067	-0.318205	0.620176	0.627073
tr|E9Q4K7|E9Q4K7_MOUSE	E9Q4K7	E9Q4K7_MOUSE	Kif13b	Protein Kif13b	0.801925	-0.318461	0.620141	0.627073
tr|Q6PHQ9|Q6PHQ9_MOUSE	Q6PHQ9	Q6PHQ9_MOUSE	Pabpc4	MCG5546, isoform CRA_c	0.801585	-0.319073	0.620058	0.627073
sp|Q9CQR4|ACO13_MOUSE	Q9CQR4	ACO13_MOUSE	Acot13	Acyl-coenzyme A thioesterase 13	0.801294	-0.319596	0.619986	0.627073
sp|Q99KE1|MAOM_MOUSE	Q99KE1	MAOM_MOUSE	Me2	NAD-dependent malic enzyme, mitochondrial	0.801291	-0.319601	0.619986	0.627073
sp|Q8BK64|AHSA1_MOUSE	Q8BK64	AHSA1_MOUSE	Ahsa1	Activator of 90 kDa heat shock protein ATPase homolog 1	0.801266	-0.319647	0.619979	0.627073
sp|P52196|THTR_MOUSE	P52196	THTR_MOUSE	Tst	Thiosulfate sulfurtransferase	0.800711	-0.320646	0.619841	0.627073
sp|O55143|AT2A2_MOUSE	O55143	AT2A2_MOUSE	Atp2a2	Sarcoplasmic/endoplasmic reticulum calcium ATPase 2	0.800404	-0.3212	0.619764	0.627073
sp|Q8K1R3|PNPT1_MOUSE	Q8K1R3	PNPT1_MOUSE	Pnpt1	Polyribonucleotide nucleotidyltransferase 1, mitochondrial	0.79999	-0.321947	0.61966	0.627073
sp|P23116|EIF3A_MOUSE	P23116	EIF3A_MOUSE	Eif3a	Eukaryotic translation initiation factor 3 subunit A	0.799739	-0.322398	0.619596	0.627073
sp|Q9DCW4|ETFB_MOUSE	Q9DCW4	ETFB_MOUSE	Etfb	Electron transfer flavoprotein subunit beta	0.79929	-0.323209	0.619482	0.627073
sp|P10852|4F2_MOUSE	P10852	4F2_MOUSE	Slc3a2	4F2 cell-surface antigen heavy chain	0.798148	-0.325272	0.619186	0.627073
sp|Q6P8K8|CBPA4_MOUSE	Q6P8K8	CBPA4_MOUSE	Cpa4	Carboxypeptidase A4	0.798099	-0.325361	0.619173	0.627073
sp|P12382|K6PL_MOUSE	P12382	K6PL_MOUSE	Pfkl	ATP-dependent 6-phosphofructokinase, liver type	0.797544	-0.326363	0.619027	0.627073
sp|O54692|ZW10_MOUSE	O54692	ZW10_MOUSE	Zw10	Centromere/kinetochore protein zw10 homolog	0.797428	-0.326574	0.618997	0.627073
sp|Q3URE1|ACSF3_MOUSE	Q3URE1	ACSF3_MOUSE	Acsf3	Acyl-CoA synthetase family member 3, mitochondrial	0.797337	-0.326739	0.618972	0.627073
sp|Q61210|ARHG1_MOUSE	Q61210	ARHG1_MOUSE	Arhgef1	Rho guanine nucleotide exchange factor 1	0.79722	-0.326949	0.618942	0.627073
sp|Q99N96|RM01_MOUSE	Q99N96	RM01_MOUSE	Mrpl1	39S ribosomal protein L1, mitochondrial	0.797192	-0.327001	0.618934	0.627073
sp|P41241|CSK_MOUSE	P41241	CSK_MOUSE	Csk	Tyrosine-protein kinase CSK	0.796723	-0.327851	0.618809	0.627073
sp|Q9D7B6|ACAD8_MOUSE	Q9D7B6	ACAD8_MOUSE	Acad8	Isobutyryl-CoA dehydrogenase, mitochondrial	0.796363	-0.328502	0.618712	0.627073
tr|E9Q7L0|E9Q7L0_MOUSE	E9Q7L0	E9Q7L0_MOUSE	Ogdhl	Protein Ogdhl	0.796356	-0.328515	0.61871	0.627073
sp|P24270|CATA_MOUSE	P24270	CATA_MOUSE	Cat	Catalase	0.79632	-0.32858	0.6187	0.627073
sp|Q61941|NNTM_MOUSE	Q61941	NNTM_MOUSE	Nnt	NAD(P) transhydrogenase, mitochondrial	0.795891	-0.329357	0.618584	0.627073
sp|Q61292|LAMB2_MOUSE	Q61292	LAMB2_MOUSE	Lamb2	Laminin subunit beta-2	0.795853	-0.329426	0.618574	0.627073
sp|P70288|HDAC2_MOUSE	P70288	HDAC2_MOUSE	Hdac2	Histone deacetylase 2	0.795322	-0.330388	0.618429	0.627073
sp|P63037|DNJA1_MOUSE	P63037	DNJA1_MOUSE	Dnaja1	DnaJ homolog subfamily A member 1	0.794791	-0.331353	0.618282	0.627073
sp|Q3TQB2|FXRD1_MOUSE	Q3TQB2	FXRD1_MOUSE	Foxred1	FAD-dependent oxidoreductase domain-containing protein 1	0.794737	-0.331451	0.618267	0.627073
sp|Q8JZQ9|EIF3B_MOUSE	Q8JZQ9	EIF3B_MOUSE	Eif3b	Eukaryotic translation initiation factor 3 subunit B	0.794633	-0.33164	0.618238	0.627073
sp|P50516|VATA_MOUSE	P50516	VATA_MOUSE	Atp6v1a	V-type proton ATPase catalytic subunit A	0.794465	-0.331944	0.618192	0.627073
sp|Q8BIP0|SYDM_MOUSE	Q8BIP0	SYDM_MOUSE	Dars2	Aspartate--tRNA ligase, mitochondrial	0.794086	-0.332634	0.618086	0.627073
sp|P39447|ZO1_MOUSE	P39447	ZO1_MOUSE	Tjp1	Tight junction protein ZO-1	0.793813	-0.33313	0.618009	0.627073
sp|Q9D662|SC23B_MOUSE	Q9D662	SC23B_MOUSE	Sec23b	Protein transport protein Sec23B	0.793752	-0.33324	0.617992	0.627073
sp|Q9Z2A0|PDPK1_MOUSE	Q9Z2A0	PDPK1_MOUSE	Pdpk1	3-phosphoinositide-dependent protein kinase 1	0.792658	-0.335229	0.617681	0.627073
sp|O88967|YMEL1_MOUSE	O88967	YMEL1_MOUSE	Yme1l1	ATP-dependent zinc metalloprotease YME1L1	0.792521	-0.335479	0.617642	0.627073
sp|O88543|CSN3_MOUSE	O88543	CSN3_MOUSE	Cops3	COP9 signalosome complex subunit 3	0.792429	-0.335647	0.617615	0.627073
sp|P62311|LSM3_MOUSE	P62311	LSM3_MOUSE	Lsm3	U6 snRNA-associated Sm-like protein LSm3	0.791915	-0.336583	0.617467	0.627073
sp|A2AN08|UBR4_MOUSE	A2AN08	UBR4_MOUSE	Ubr4	E3 ubiquitin-protein ligase UBR4	0.791305	-0.337695	0.617289	0.627073
sp|Q9CXT8|MPPB_MOUSE	Q9CXT8	MPPB_MOUSE	Pmpcb	Mitochondrial-processing peptidase subunit beta	0.790996	-0.338257	0.617198	0.627073
sp|Q61879|MYH10_MOUSE	Q61879	MYH10_MOUSE	Myh10	Myosin-10	0.790947	-0.338347	0.617183	0.627073
sp|P60843|IF4A1_MOUSE	P60843	IF4A1_MOUSE	Eif4a1	Eukaryotic initiation factor 4A-I	0.790909	-0.338417	0.617172	0.627073
sp|Q9DCN2|NB5R3_MOUSE	Q9DCN2	NB5R3_MOUSE	Cyb5r3	NADH-cytochrome b5 reductase 3	0.790591	-0.338996	0.617078	0.627073
sp|Q8VDM6|HNRL1_MOUSE	Q8VDM6	HNRL1_MOUSE	Hnrnpul1	Heterogeneous nuclear ribonucleoprotein U-like protein 1	0.790369	-0.339401	0.617012	0.627073
sp|Q7TSS2|UB2Q1_MOUSE	Q7TSS2	UB2Q1_MOUSE	Ube2q1	Ubiquitin-conjugating enzyme E2 Q1	0.790246	-0.339627	0.616976	0.627073
sp|P25206|MCM3_MOUSE	P25206	MCM3_MOUSE	Mcm3	DNA replication licensing factor MCM3	0.790157	-0.339789	0.616949	0.627073
sp|Q6PB66|LPPRC_MOUSE	Q6PB66	LPPRC_MOUSE	Lrpprc	Leucine-rich PPR motif-containing protein, mitochondrial	0.789254	-0.341438	0.616678	0.627073
sp|Q61553|FSCN1_MOUSE	Q61553	FSCN1_MOUSE	Fscn1	Fascin	0.789068	-0.341779	0.616621	0.627073
sp|Q9CQ48|NUDC2_MOUSE	Q9CQ48	NUDC2_MOUSE	Nudcd2	NudC domain-containing protein 2	0.788762	-0.342338	0.616528	0.627073
sp|Q9Z1X4|ILF3_MOUSE	Q9Z1X4	ILF3_MOUSE	Ilf3	Interleukin enhancer-binding factor 3	0.788265	-0.343247	0.616376	0.627073
sp|Q8K3H0|DP13A_MOUSE	Q8K3H0	DP13A_MOUSE	Appl1	DCC-interacting protein 13-alpha	0.787319	-0.34498	0.616083	0.627073
sp|Q08093|CNN2_MOUSE	Q08093	CNN2_MOUSE	Cnn2	Calponin-2	0.787089	-0.345402	0.616011	0.627073
sp|Q5SWU9|ACACA_MOUSE	Q5SWU9	ACACA_MOUSE	Acaca	Acetyl-CoA carboxylase 1	0.787051	-0.345471	0.616	0.627073
sp|P61759|PFD3_MOUSE	P61759	PFD3_MOUSE	Vbp1	Prefoldin subunit 3	0.786514	-0.346455	0.615831	0.627073
sp|P62077|TIM8B_MOUSE	P62077	TIM8B_MOUSE	Timm8b	Mitochondrial import inner membrane translocase subunit Tim8 B	0.786097	-0.34722	0.615699	0.627073
sp|Q5F2E8|TAOK1_MOUSE	Q5F2E8	TAOK1_MOUSE	Taok1	Serine/threonine-protein kinase TAO1	0.785846	-0.347681	0.615619	0.627073
sp|Q9CQR6|PPP6_MOUSE	Q9CQR6	PPP6_MOUSE	Ppp6c	Serine/threonine-protein phosphatase 6 catalytic subunit	0.785827	-0.347717	0.615613	0.627073
sp|Q9WUM5|SUCA_MOUSE	Q9WUM5	SUCA_MOUSE	Suclg1	Succinyl-CoA ligase [ADP/GDP-forming] subunit alpha, mitochondrial	0.784873	-0.349469	0.615307	0.627073
sp|Q9CZR8|EFTS_MOUSE	Q9CZR8	EFTS_MOUSE	Tsfm	Elongation factor Ts, mitochondrial	0.784627	-0.34992	0.615227	0.627073
sp|Q566J8|ADCK4_MOUSE	Q566J8	ADCK4_MOUSE	Adck4	AarF domain-containing protein kinase 4	0.784185	-0.350734	0.615083	0.627073
sp|A2A7S8|K1522_MOUSE	A2A7S8	K1522_MOUSE	Kiaa1522	Uncharacterized protein KIAA1522	0.783472	-0.352046	0.614849	0.627073
sp|Q6NXW6|RAD17_MOUSE	Q6NXW6	RAD17_MOUSE	Rad17	Cell cycle checkpoint protein RAD17	0.783444	-0.352097	0.61484	0.627073
sp|Q9R111|GUAD_MOUSE	Q9R111	GUAD_MOUSE	Gda	Guanine deaminase	0.781899	-0.354946	0.614324	0.627073
sp|Q8R180|ERO1A_MOUSE	Q8R180	ERO1A_MOUSE	Ero1l	ERO1-like protein alpha	0.781868	-0.355002	0.614314	0.627073
sp|P62814|VATB2_MOUSE	P62814	VATB2_MOUSE	Atp6v1b2	V-type proton ATPase subunit B, brain isoform	0.781422	-0.355825	0.614163	0.627073
sp|P17950|IER2_MOUSE	P17950	IER2_MOUSE	Ier2	Immediate early response gene 2 protein	0.781414	-0.355841	0.61416	0.627073
sp|P62082|RS7_MOUSE	P62082	RS7_MOUSE	Rps7	40S ribosomal protein S7	0.781097	-0.356426	0.614052	0.627073
sp|Q9CXY6|ILF2_MOUSE	Q9CXY6	ILF2_MOUSE	Ilf2	Interleukin enhancer-binding factor 2	0.780409	-0.357698	0.613816	0.627073
sp|Q9CWX9|DDX47_MOUSE	Q9CWX9	DDX47_MOUSE	Ddx47	Probable ATP-dependent RNA helicase DDX47	0.779536	-0.359312	0.613514	0.627073
sp|Q61026|NCOA2_MOUSE	Q61026	NCOA2_MOUSE	Ncoa2	Nuclear receptor coactivator 2	0.778845	-0.360592	0.613272	0.627073
sp|O88351|IKKB_MOUSE	O88351	IKKB_MOUSE	Ikbkb	Inhibitor of nuclear factor kappa-B kinase subunit beta	0.778595	-0.361055	0.613183	0.627073
sp|P49722|PSA2_MOUSE	P49722	PSA2_MOUSE	Psma2	Proteasome subunit alpha type-2	0.777944	-0.362261	0.612953	0.627073
sp|Q8BLN5|ERG7_MOUSE	Q8BLN5	ERG7_MOUSE	Lss	Lanosterol synthase	0.77767	-0.36277	0.612855	0.627073
sp|Q8CC88|VWA8_MOUSE	Q8CC88	VWA8_MOUSE	Vwa8	von Willebrand factor A domain-containing protein 8	0.77739	-0.36329	0.612754	0.627073
sp|P14685|PSMD3_MOUSE	P14685	PSMD3_MOUSE	Psmd3	26S proteasome non-ATPase regulatory subunit 3	0.776956	-0.364096	0.612598	0.627073
sp|Q9WU56|TRUA_MOUSE	Q9WU56	TRUA_MOUSE	Pus1	tRNA pseudouridine synthase A, mitochondrial	0.776781	-0.364421	0.612535	0.627073
sp|E9Q634|MYO1E_MOUSE	E9Q634	MYO1E_MOUSE	Myo1e	Unconventional myosin-Ie	0.776593	-0.364769	0.612467	0.627073
sp|P70268|PKN1_MOUSE	P70268	PKN1_MOUSE	Pkn1	Serine/threonine-protein kinase N1	0.776092	-0.365701	0.612284	0.627073
sp|Q8K215|LYRM4_MOUSE	Q8K215	LYRM4_MOUSE	Lyrm4	LYR motif-containing protein 4	0.774976	-0.367777	0.611874	0.627073
sp|Q3UKC1|TAXB1_MOUSE	Q3UKC1	TAXB1_MOUSE	Tax1bp1	Tax1-binding protein 1 homolog	0.774539	-0.36859	0.611712	0.627073
sp|Q8BGQ7|SYAC_MOUSE	Q8BGQ7	SYAC_MOUSE	Aars	Alanine--tRNA ligase, cytoplasmic	0.774513	-0.368638	0.611702	0.627073
sp|Q8C1B7|SEP11_MOUSE	Q8C1B7	SEP11_MOUSE	42258	Septin-11	0.77417	-0.369278	0.611574	0.627073
sp|Q9WVL5|MORC1_MOUSE	Q9WVL5	MORC1_MOUSE	Morc1	MORC family CW-type zinc finger protein 1	0.77409	-0.369427	0.611544	0.627073
sp|P70398|USP9X_MOUSE	P70398	USP9X_MOUSE	Usp9x	Probable ubiquitin carboxyl-terminal hydrolase FAF-X	0.77386	-0.369855	0.611457	0.627073
sp|Q8BFP9|PDK1_MOUSE	Q8BFP9	PDK1_MOUSE	Pdk1	[Pyruvate dehydrogenase (acetyl-transferring)] kinase isozyme 1, mitochondrial	0.773593	-0.370353	0.611357	0.627073
sp|P29341|PABP1_MOUSE	P29341	PABP1_MOUSE	Pabpc1	Polyadenylate-binding protein 1	0.773219	-0.37105	0.611215	0.627073
sp|Q9D071|MMS19_MOUSE	Q9D071	MMS19_MOUSE	Mms19	MMS19 nucleotide excision repair protein homolog	0.772297	-0.372772	0.610864	0.627073
sp|Q9WUD1|CHIP_MOUSE	Q9WUD1	CHIP_MOUSE	Stub1	STIP1 homology and U box-containing protein 1	0.772236	-0.372886	0.61084	0.627073
sp|Q91WQ3|SYYC_MOUSE	Q91WQ3	SYYC_MOUSE	Yars	Tyrosine--tRNA ligase, cytoplasmic	0.771766	-0.373764	0.61066	0.627073
sp|Q9DCT8|CRIP2_MOUSE	Q9DCT8	CRIP2_MOUSE	Crip2	Cysteine-rich protein 2	0.771232	-0.374763	0.610453	0.627073
sp|Q8C050|KS6A5_MOUSE	Q8C050	KS6A5_MOUSE	Rps6ka5	Ribosomal protein S6 kinase alpha-5	0.771033	-0.375135	0.610375	0.627073
sp|P10630|IF4A2_MOUSE	P10630	IF4A2_MOUSE	Eif4a2	Eukaryotic initiation factor 4A-II	0.770733	-0.375697	0.610258	0.627073
sp|Q9QZ08|NAGK_MOUSE	Q9QZ08	NAGK_MOUSE	Nagk	N-acetyl-D-glucosamine kinase	0.770458	-0.376212	0.61015	0.627073
sp|P08752|GNAI2_MOUSE	P08752	GNAI2_MOUSE	Gnai2	Guanine nucleotide-binding protein G(i) subunit alpha-2	0.76996	-0.377144	0.609954	0.627073
sp|Q99K85|SERC_MOUSE	Q99K85	SERC_MOUSE	Psat1	Phosphoserine aminotransferase	0.769585	-0.377847	0.609806	0.627073
sp|Q9QZH6|ECSIT_MOUSE	Q9QZH6	ECSIT_MOUSE	Ecsit	Evolutionarily conserved signaling intermediate in Toll pathway, mitochondrial	0.769374	-0.378243	0.609722	0.627073
sp|P70404|IDHG1_MOUSE	P70404	IDHG1_MOUSE	Idh3g	Isocitrate dehydrogenase [NAD] subunit gamma 1, mitochondrial	0.769105	-0.378748	0.609615	0.627073
sp|Q8BWU5|OSGEP_MOUSE	Q8BWU5	OSGEP_MOUSE	Osgep	Probable tRNA N6-adenosine threonylcarbamoyltransferase	0.769081	-0.378792	0.609605	0.627073
sp|Q61474|MSI1H_MOUSE	Q61474	MSI1H_MOUSE	Msi1	RNA-binding protein Musashi homolog 1	0.768605	-0.379686	0.609415	0.627073
sp|Q9D172|ES1_MOUSE	Q9D172	ES1_MOUSE	D10Jhu81e	ES1 protein homolog, mitochondrial	0.768539	-0.37981	0.609388	0.627073
sp|P46467|VPS4B_MOUSE	P46467	VPS4B_MOUSE	Vps4b	Vacuolar protein sorting-associated protein 4B	0.768382	-0.380104	0.609325	0.627073
sp|Q8BMJ2|SYLC_MOUSE	Q8BMJ2	SYLC_MOUSE	Lars	Leucine--tRNA ligase, cytoplasmic	0.768	-0.380822	0.609171	0.627073
sp|Q9D2V7|CORO7_MOUSE	Q9D2V7	CORO7_MOUSE	Coro7	Coronin-7	0.767611	-0.381552	0.609013	0.627073
sp|P53395|ODB2_MOUSE	P53395	ODB2_MOUSE	Dbt	Lipoamide acyltransferase component of branched-chain alpha-keto acid dehydrogenase complex, mitochondrial	0.767118	-0.38248	0.608812	0.627073
sp|O35855|BCAT2_MOUSE	O35855	BCAT2_MOUSE	Bcat2	Branched-chain-amino-acid aminotransferase, mitochondrial	0.766993	-0.382716	0.608761	0.627073
sp|Q8VDM4|PSMD2_MOUSE	Q8VDM4	PSMD2_MOUSE	Psmd2	26S proteasome non-ATPase regulatory subunit 2	0.76614	-0.38432	0.60841	0.627073
sp|P26231|CTNA1_MOUSE	P26231	CTNA1_MOUSE	Ctnna1	Catenin alpha-1	0.765726	-0.385101	0.608238	0.627073
sp|Q3UM18|LSG1_MOUSE	Q3UM18	LSG1_MOUSE	Lsg1	Large subunit GTPase 1 homolog	0.764716	-0.387004	0.607816	0.627073
sp|Q9QZD9|EIF3I_MOUSE	Q9QZD9	EIF3I_MOUSE	Eif3i	Eukaryotic translation initiation factor 3 subunit I	0.764688	-0.387057	0.607804	0.627073
sp|Q99M31|HSP7E_MOUSE	Q99M31	HSP7E_MOUSE	Hspa14	Heat shock 70 kDa protein 14	0.764498	-0.387415	0.607724	0.627073
sp|Q9DCL9|PUR6_MOUSE	Q9DCL9	PUR6_MOUSE	Paics	Multifunctional protein ADE2	0.763857	-0.388625	0.607453	0.627073
tr|Q6ZWZ6|Q6ZWZ6_MOUSE	Q6ZWZ6	Q6ZWZ6_MOUSE	Rps12	40S ribosomal protein S12	0.76347	-0.389357	0.607288	0.627073
sp|Q9JKR6|HYOU1_MOUSE	Q9JKR6	HYOU1_MOUSE	Hyou1	Hypoxia up-regulated protein 1	0.763064	-0.390125	0.607114	0.627073
sp|Q8R059|GALE_MOUSE	Q8R059	GALE_MOUSE	Gale	UDP-glucose 4-epimerase	0.762731	-0.390753	0.606972	0.627073
sp|Q02248|CTNB1_MOUSE	Q02248	CTNB1_MOUSE	Ctnnb1	Catenin beta-1	0.762718	-0.390779	0.606966	0.627073
tr|F8VQ29|F8VQ29_MOUSE	F8VQ29	F8VQ29_MOUSE	Iqgap3	Protein Iqgap3	0.762565	-0.391068	0.6069	0.627073
sp|Q6P5F9|XPO1_MOUSE	Q6P5F9	XPO1_MOUSE	Xpo1	Exportin-1	0.76232	-0.391532	0.606794	0.627073
sp|Q6P5E4|UGGG1_MOUSE	Q6P5E4	UGGG1_MOUSE	Uggt1	UDP-glucose:glycoprotein glucosyltransferase 1	0.762217	-0.391727	0.606749	0.627073
sp|Q07417|ACADS_MOUSE	Q07417	ACADS_MOUSE	Acads	Short-chain specific acyl-CoA dehydrogenase, mitochondrial	0.761877	-0.39237	0.606602	0.627073
sp|P18653|KS6A1_MOUSE	P18653	KS6A1_MOUSE	Rps6ka1	Ribosomal protein S6 kinase alpha-1	0.761854	-0.392413	0.606592	0.627073
sp|Q9JKF7|RM39_MOUSE	Q9JKF7	RM39_MOUSE	Mrpl39	39S ribosomal protein L39, mitochondrial	0.761253	-0.393552	0.60633	0.627073
sp|Q3THE2|ML12B_MOUSE	Q3THE2	ML12B_MOUSE	Myl12b	Myosin regulatory light chain 12B	0.760471	-0.395036	0.605986	0.627073
sp|Q3TPE9|ANKY2_MOUSE	Q3TPE9	ANKY2_MOUSE	Ankmy2	Ankyrin repeat and MYND domain-containing protein 2	0.760118	-0.395704	0.60583	0.627073
sp|Q9CQN7|RM41_MOUSE	Q9CQN7	RM41_MOUSE	Mrpl41	39S ribosomal protein L41, mitochondrial	0.759936	-0.39605	0.605749	0.627073
sp|P62835|RAP1A_MOUSE	P62835	RAP1A_MOUSE	Rap1a	Ras-related protein Rap-1A	0.759876	-0.396163	0.605723	0.627073
sp|Q61699|HS105_MOUSE	Q61699	HS105_MOUSE	Hsph1	Heat shock protein 105 kDa	0.759845	-0.396223	0.605709	0.627073
sp|Q9D892|ITPA_MOUSE	Q9D892	ITPA_MOUSE	Itpa	Inosine triphosphate pyrophosphatase	0.759433	-0.397006	0.605525	0.627073
sp|Q61335|BAP31_MOUSE	Q61335	BAP31_MOUSE	Bcap31	B-cell receptor-associated protein 31	0.759147	-0.39755	0.605397	0.627073
sp|O08807|PRDX4_MOUSE	O08807	PRDX4_MOUSE	Prdx4	Peroxiredoxin-4	0.759067	-0.3977	0.605361	0.627073
sp|Q68FD5|CLH1_MOUSE	Q68FD5	CLH1_MOUSE	Cltc	Clathrin heavy chain 1	0.758992	-0.397844	0.605327	0.627073
sp|P41216|ACSL1_MOUSE	P41216	ACSL1_MOUSE	Acsl1	Long-chain-fatty-acid--CoA ligase 1	0.758435	-0.398902	0.605077	0.627073
sp|Q9WTX2|PRKRA_MOUSE	Q9WTX2	PRKRA_MOUSE	Prkra	Interferon-inducible double-stranded RNA-dependent protein kinase activator A	0.758228	-0.399296	0.604983	0.627073
sp|Q8VDD5|MYH9_MOUSE	Q8VDD5	MYH9_MOUSE	Myh9	Myosin-9	0.758203	-0.399344	0.604972	0.627073
sp|Q8R3K3|PTCD2_MOUSE	Q8R3K3	PTCD2_MOUSE	Ptcd2	Pentatricopeptide repeat-containing protein 2, mitochondrial	0.758051	-0.399633	0.604903	0.627073
sp|P00493|HPRT_MOUSE	P00493	HPRT_MOUSE	Hprt1	Hypoxanthine-guanine phosphoribosyltransferase	0.756813	-0.401991	0.604338	0.627073
sp|O08848|RO60_MOUSE	O08848	RO60_MOUSE	Trove2	60 kDa SS-A/Ro ribonucleoprotein	0.756422	-0.402737	0.604157	0.627073
sp|P12388|PAI2_MOUSE	P12388	PAI2_MOUSE	Serpinb2	Plasminogen activator inhibitor 2, macrophage	0.756212	-0.403138	0.60406	0.627073
sp|Q922D8|C1TC_MOUSE	Q922D8	C1TC_MOUSE	Mthfd1	C-1-tetrahydrofolate synthase, cytoplasmic	0.756166	-0.403225	0.604039	0.627073
sp|Q9DBH5|LMAN2_MOUSE	Q9DBH5	LMAN2_MOUSE	Lman2	Vesicular integral-membrane protein VIP36	0.755646	-0.404218	0.603797	0.627073
sp|Q922H4|GMPPA_MOUSE	Q922H4	GMPPA_MOUSE	Gmppa	Mannose-1-phosphate guanyltransferase alpha	0.75541	-0.404669	0.603687	0.627073
sp|P47758|SRPRB_MOUSE	P47758	SRPRB_MOUSE	Srprb	Signal recognition particle receptor subunit beta	0.755375	-0.404735	0.603671	0.627073
sp|Q9R1P0|PSA4_MOUSE	Q9R1P0	PSA4_MOUSE	Psma4	Proteasome subunit alpha type-4	0.75532	-0.40484	0.603645	0.627073
sp|Q91YY4|ATPF2_MOUSE	Q91YY4	ATPF2_MOUSE	Atpaf2	ATP synthase mitochondrial F1 complex assembly factor 2	0.754742	-0.405944	0.603375	0.627073
sp|Q8K0D5|EFGM_MOUSE	Q8K0D5	EFGM_MOUSE	Gfm1	Elongation factor G, mitochondrial	0.754057	-0.407254	0.603051	0.627073
sp|Q6PB93|GALT2_MOUSE	Q6PB93	GALT2_MOUSE	Galnt2	Polypeptide N-acetylgalactosaminyltransferase 2	0.753868	-0.407615	0.602962	0.627073
sp|P62843|RS15_MOUSE	P62843	RS15_MOUSE	Rps15	40S ribosomal protein S15	0.753491	-0.408337	0.602783	0.627073
sp|O70435|PSA3_MOUSE	O70435	PSA3_MOUSE	Psma3	Proteasome subunit alpha type-3	0.752764	-0.409731	0.602434	0.627073
sp|Q9R0Q3|TMED2_MOUSE	Q9R0Q3	TMED2_MOUSE	Tmed2	Transmembrane emp24 domain-containing protein 2	0.752177	-0.410856	0.602152	0.627073
sp|Q8BWT1|THIM_MOUSE	Q8BWT1	THIM_MOUSE	Acaa2	3-ketoacyl-CoA thiolase, mitochondrial	0.752086	-0.41103	0.602108	0.627073
sp|Q6ZQ88|KDM1A_MOUSE	Q6ZQ88	KDM1A_MOUSE	Kdm1a	Lysine-specific histone demethylase 1A	0.751069	-0.412982	0.601614	0.627073
sp|Q9JJ11|TACC3_MOUSE	Q9JJ11	TACC3_MOUSE	Tacc3	Transforming acidic coiled-coil-containing protein 3	0.750996	-0.413122	0.601578	0.627073
sp|Q3TCN2|PLBL2_MOUSE	Q3TCN2	PLBL2_MOUSE	Plbd2	Putative phospholipase B-like 2	0.750577	-0.413929	0.601373	0.627073
sp|Q64521|GPDM_MOUSE	Q64521	GPDM_MOUSE	Gpd2	Glycerol-3-phosphate dehydrogenase, mitochondrial	0.750346	-0.414372	0.601259	0.627073
sp|P18155|MTDC_MOUSE	P18155	MTDC_MOUSE	Mthfd2	Bifunctional methylenetetrahydrofolate dehydrogenase/cyclohydrolase, mitochondrial	0.750114	-0.414819	0.601145	0.627073
sp|A2A5Z6|SMUF2_MOUSE	A2A5Z6	SMUF2_MOUSE	Smurf2	E3 ubiquitin-protein ligase SMURF2	0.749234	-0.416512	0.600709	0.627073
sp|Q99MD9|NASP_MOUSE	Q99MD9	NASP_MOUSE	Nasp	Nuclear autoantigenic sperm protein	0.749226	-0.416527	0.600705	0.627073
sp|Q6P9R2|OXSR1_MOUSE	Q6P9R2	OXSR1_MOUSE	Oxsr1	Serine/threonine-protein kinase OSR1	0.749043	-0.41688	0.600613	0.627073
sp|Q3UPL0|SC31A_MOUSE	Q3UPL0	SC31A_MOUSE	Sec31a	Protein transport protein Sec31A	0.748343	-0.418228	0.600263	0.627073
sp|P61222|ABCE1_MOUSE	P61222	ABCE1_MOUSE	Abce1	ATP-binding cassette sub-family E member 1	0.747334	-0.420175	0.599754	0.627073
sp|P07310|KCRM_MOUSE	P07310	KCRM_MOUSE	Ckm	Creatine kinase M-type	0.747025	-0.420772	0.599596	0.627073
sp|Q99P72|RTN4_MOUSE	Q99P72	RTN4_MOUSE	Rtn4	Reticulon-4	0.746945	-0.420925	0.599556	0.627073
sp|Q8CCB4|VPS53_MOUSE	Q8CCB4	VPS53_MOUSE	Vps53	Vacuolar protein sorting-associated protein 53 homolog	0.74664	-0.421515	0.5994	0.627073
sp|Q61035|SYHC_MOUSE	Q61035	SYHC_MOUSE	Hars	Histidine--tRNA ligase, cytoplasmic	0.746373	-0.422031	0.599264	0.627073
sp|Q9Z2U0|PSA7_MOUSE	Q9Z2U0	PSA7_MOUSE	Psma7	Proteasome subunit alpha type-7	0.745943	-0.422862	0.599043	0.627073
sp|Q9CXF4|TBC15_MOUSE	Q9CXF4	TBC15_MOUSE	Tbc1d15	TBC1 domain family member 15	0.745893	-0.42296	0.599017	0.627073
sp|Q9D3E6|STAG1_MOUSE	Q9D3E6	STAG1_MOUSE	Stag1	Cohesin subunit SA-1	0.745497	-0.423726	0.598812	0.627073
tr|Q3U2G2|Q3U2G2_MOUSE	Q3U2G2	Q3U2G2_MOUSE	Hspa4	Heat shock 70 kDa protein 4	0.745223	-0.424256	0.598671	0.627073
sp|Q9CZW5|TOM70_MOUSE	Q9CZW5	TOM70_MOUSE	Tomm70a	Mitochondrial import receptor subunit TOM70	0.745221	-0.42426	0.59867	0.627073
sp|Q9DBR7|MYPT1_MOUSE	Q9DBR7	MYPT1_MOUSE	Ppp1r12a	Protein phosphatase 1 regulatory subunit 12A	0.744688	-0.425293	0.598393	0.627073
sp|P28658|ATX10_MOUSE	P28658	ATX10_MOUSE	Atxn10	Ataxin-10	0.744355	-0.425937	0.598219	0.627073
sp|P14206|RSSA_MOUSE	P14206	RSSA_MOUSE	Rpsa	40S ribosomal protein SA	0.74401	-0.426605	0.598039	0.627073
sp|Q9CZ13|QCR1_MOUSE	Q9CZ13	QCR1_MOUSE	Uqcrc1	Cytochrome b-c1 complex subunit 1, mitochondrial	0.743644	-0.427317	0.597846	0.627073
sp|Q8BKC5|IPO5_MOUSE	Q8BKC5	IPO5_MOUSE	Ipo5	Importin-5	0.743611	-0.427379	0.597829	0.627073
sp|Q8K411|PREP_MOUSE	Q8K411	PREP_MOUSE	Pitrm1	Presequence protease, mitochondrial	0.743023	-0.428521	0.597518	0.627073
sp|Q91V92|ACLY_MOUSE	Q91V92	ACLY_MOUSE	Acly	ATP-citrate synthase	0.742322	-0.429884	0.597146	0.627073
sp|P38647|GRP75_MOUSE	P38647	GRP75_MOUSE	Hspa9	Stress-70 protein, mitochondrial	0.742272	-0.429979	0.59712	0.627073
tr|Q5NCJ0|Q5NCJ0_MOUSE	Q5NCJ0	Q5NCJ0_MOUSE	Rapgef6	Protein Rapgef6	0.741834	-0.430831	0.596885	0.627073
sp|Q91YH5|ATLA3_MOUSE	Q91YH5	ATLA3_MOUSE	Atl3	Atlastin-3	0.741461	-0.431558	0.596685	0.627073
sp|Q8VEM8|MPCP_MOUSE	Q8VEM8	MPCP_MOUSE	Slc25a3	Phosphate carrier protein, mitochondrial	0.741334	-0.431804	0.596617	0.627073
sp|Q8BMS1|ECHA_MOUSE	Q8BMS1	ECHA_MOUSE	Hadha	Trifunctional enzyme subunit alpha, mitochondrial	0.741031	-0.432395	0.596453	0.627073
sp|Q8BTV2|CPSF7_MOUSE	Q8BTV2	CPSF7_MOUSE	Cpsf7	Cleavage and polyadenylation specificity factor subunit 7	0.740747	-0.432947	0.5963	0.627073
sp|P48410|ABCD1_MOUSE	P48410	ABCD1_MOUSE	Abcd1	ATP-binding cassette sub-family D member 1	0.740625	-0.433185	0.596234	0.627073
sp|Q99LP6|GRPE1_MOUSE	Q99LP6	GRPE1_MOUSE	Grpel1	GrpE protein homolog 1, mitochondrial	0.740603	-0.433228	0.596222	0.627073
sp|P80315|TCPD_MOUSE	P80315	TCPD_MOUSE	Cct4	T-complex protein 1 subunit delta	0.740127	-0.434155	0.595964	0.627073
sp|Q5SV80|MYO19_MOUSE	Q5SV80	MYO19_MOUSE	Myo19	Unconventional myosin-XIX	0.740026	-0.434352	0.595909	0.627073
sp|P35288|RAB23_MOUSE	P35288	RAB23_MOUSE	Rab23	Ras-related protein Rab-23	0.73994	-0.434519	0.595862	0.627073
tr|E9Q9B7|E9Q9B7_MOUSE	E9Q9B7	E9Q9B7_MOUSE	Kidins220	Protein Kidins220	0.739387	-0.435599	0.595559	0.627073
sp|Q9D6R2|IDH3A_MOUSE	Q9D6R2	IDH3A_MOUSE	Idh3a	Isocitrate dehydrogenase [NAD] subunit alpha, mitochondrial	0.739193	-0.435977	0.595453	0.627073
sp|Q99L45|IF2B_MOUSE	Q99L45	IF2B_MOUSE	Eif2s2	Eukaryotic translation initiation factor 2 subunit 2	0.738628	-0.43708	0.595142	0.627073
sp|P67871|CSK2B_MOUSE	P67871	CSK2B_MOUSE	Csnk2b	Casein kinase II subunit beta	0.738609	-0.437118	0.595132	0.627073
sp|Q923Z3|MTO1_MOUSE	Q923Z3	MTO1_MOUSE	Mto1	Protein MTO1 homolog, mitochondrial	0.738369	-0.437585	0.594999	0.627073
tr|B2RQC6|B2RQC6_MOUSE	B2RQC6	B2RQC6_MOUSE	Cad	CAD protein	0.737704	-0.438885	0.59463	0.627073
sp|P37040|NCPR_MOUSE	P37040	NCPR_MOUSE	Por	NADPH--cytochrome P450 reductase	0.737479	-0.439327	0.594504	0.627073
tr|E9Q4Y4|E9Q4Y4_MOUSE	E9Q4Y4	E9Q4Y4_MOUSE	Cep192	Protein Cep192	0.737275	-0.439726	0.594391	0.627073
sp|Q3TZM9|ALG11_MOUSE	Q3TZM9	ALG11_MOUSE	Alg11	GDP-Man:Man(3)GlcNAc(2)-PP-Dol alpha-1,2-mannosyltransferase	0.737072	-0.440122	0.594277	0.627073
sp|P50096|IMDH1_MOUSE	P50096	IMDH1_MOUSE	Impdh1	Inosine-5'-monophosphate dehydrogenase 1	0.737059	-0.440147	0.59427	0.627073
sp|Q9QXS1-3|PLEC_MOUSE	Q9QXS1-3	PLEC_MOUSE	Plec	Isoform PLEC-1A of Plectin	0.737019	-0.440227	0.594247	0.627073
sp|Q99LI8|HGS_MOUSE	Q99LI8	HGS_MOUSE	Hgs	Hepatocyte growth factor-regulated tyrosine kinase substrate	0.73654	-0.441164	0.593979	0.627073
sp|Q9D051|ODPB_MOUSE	Q9D051	ODPB_MOUSE	Pdhb	Pyruvate dehydrogenase E1 component subunit beta, mitochondrial	0.736499	-0.441244	0.593956	0.627073
sp|P35761|TTK_MOUSE	P35761	TTK_MOUSE	Ttk	Dual specificity protein kinase TTK	0.735499	-0.443206	0.59339	0.627073
sp|O70251|EF1B_MOUSE	O70251	EF1B_MOUSE	Eef1b	Elongation factor 1-beta	0.735408	-0.443383	0.593338	0.627073
sp|Q9Z1M8|RED_MOUSE	Q9Z1M8	RED_MOUSE	Ik	Protein Red	0.735357	-0.443483	0.593309	0.627073
tr|Q91VA7|Q91VA7_MOUSE	Q91VA7	Q91VA7_MOUSE	Idh3b	Isocitrate dehydrogenase 3 (NAD+) beta	0.734509	-0.445149	0.592825	0.627073
sp|Q99K01|PDXD1_MOUSE	Q99K01	PDXD1_MOUSE	Pdxdc1	Pyridoxal-dependent decarboxylase domain-containing protein 1	0.734388	-0.445387	0.592755	0.627073
sp|O35226|PSMD4_MOUSE	O35226	PSMD4_MOUSE	Psmd4	26S proteasome non-ATPase regulatory subunit 4	0.734246	-0.445665	0.592674	0.627073
sp|Q3U186|SYRM_MOUSE	Q3U186	SYRM_MOUSE	Rars2	Probable arginine--tRNA ligase, mitochondrial	0.733933	-0.446279	0.592494	0.627073
sp|Q80YR9|R12BA_MOUSE	Q80YR9	R12BA_MOUSE	Rbm12b1	RNA-binding protein 12B-A	0.733552	-0.447029	0.592274	0.627073
sp|P61027|RAB10_MOUSE	P61027	RAB10_MOUSE	Rab10	Ras-related protein Rab-10	0.733447	-0.447236	0.592213	0.627073
sp|Q8BSQ9|PB1_MOUSE	Q8BSQ9	PB1_MOUSE	Pbrm1	Protein polybromo-1	0.732856	-0.448398	0.591871	0.627073
sp|Q8VHE0|SEC63_MOUSE	Q8VHE0	SEC63_MOUSE	Sec63	Translocation protein SEC63 homolog	0.732582	-0.448938	0.591711	0.627073
sp|Q811I0|ATPF1_MOUSE	Q811I0	ATPF1_MOUSE	Atpaf1	ATP synthase mitochondrial F1 complex assembly factor 1	0.732543	-0.449014	0.591689	0.627073
sp|Q6ZWU9|RS27_MOUSE	Q6ZWU9	RS27_MOUSE	Rps27	40S ribosomal protein S27	0.732453	-0.449192	0.591636	0.627073
sp|Q9EQH3|VPS35_MOUSE	Q9EQH3	VPS35_MOUSE	Vps35	Vacuolar protein sorting-associated protein 35	0.73234	-0.449415	0.59157	0.627073
sp|Q8CFA2|GCST_MOUSE	Q8CFA2	GCST_MOUSE	Amt	Aminomethyltransferase, mitochondrial	0.73216	-0.449768	0.591465	0.627073
sp|Q62186|SSRD_MOUSE	Q62186	SSRD_MOUSE	Ssr4	Translocon-associated protein subunit delta	0.731974	-0.450135	0.591356	0.627073
sp|P01942|HBA_MOUSE	P01942	HBA_MOUSE	Hba	Hemoglobin subunit alpha	0.731044	-0.45197	0.590808	0.627073
sp|Q91VR2|ATPG_MOUSE	Q91VR2	ATPG_MOUSE	Atp5c1	ATP synthase subunit gamma, mitochondrial	0.730461	-0.453121	0.590463	0.627073
sp|Q8JZS9|RM48_MOUSE	Q8JZS9	RM48_MOUSE	Mrpl48	39S ribosomal protein L48, mitochondrial	0.730436	-0.45317	0.590448	0.627073
sp|P54071|IDHP_MOUSE	P54071	IDHP_MOUSE	Idh2	Isocitrate dehydrogenase [NADP], mitochondrial	0.730366	-0.453308	0.590407	0.627073
sp|P26041|MOES_MOUSE	P26041	MOES_MOUSE	Msn	Moesin	0.729753	-0.454519	0.590041	0.627073
tr|E9PWG6|E9PWG6_MOUSE	E9PWG6	E9PWG6_MOUSE	Ncapg	Protein Ncapg	0.729561	-0.454899	0.589926	0.627073
sp|Q80XU3|NUCKS_MOUSE	Q80XU3	NUCKS_MOUSE	Nucks1	Nuclear ubiquitous casein and cyclin-dependent kinase substrate 1	0.729557	-0.454908	0.589923	0.627073
sp|Q8BIJ6|SYIM_MOUSE	Q8BIJ6	SYIM_MOUSE	Iars2	Isoleucine--tRNA ligase, mitochondrial	0.728491	-0.457017	0.589282	0.627073
sp|Q9D0M3|CY1_MOUSE	Q9D0M3	CY1_MOUSE	Cyc1	Cytochrome c1, heme protein, mitochondrial	0.727955	-0.458079	0.588958	0.627073
sp|Q99KR7|PPIF_MOUSE	Q99KR7	PPIF_MOUSE	Ppif	Peptidyl-prolyl cis-trans isomerase F, mitochondrial	0.727836	-0.458314	0.588886	0.627073
sp|Q8BWY9|CIP2A_MOUSE	Q8BWY9	CIP2A_MOUSE	Kiaa1524	Protein CIP2A	0.727097	-0.459781	0.588435	0.627073
tr|F8VQC1|F8VQC1_MOUSE	F8VQC1	F8VQC1_MOUSE	Srp72	Signal recognition particle subunit SRP72	0.72681	-0.46035	0.588259	0.627073
sp|O08915|AIP_MOUSE	O08915	AIP_MOUSE	Aip	AH receptor-interacting protein	0.726626	-0.460715	0.588147	0.627073
sp|P17182|ENOA_MOUSE	P17182	ENOA_MOUSE	Eno1	Alpha-enolase	0.72615	-0.461661	0.587854	0.627073
sp|P16332|MUTA_MOUSE	P16332	MUTA_MOUSE	Mut	Methylmalonyl-CoA mutase, mitochondrial	0.725541	-0.462871	0.587477	0.627073
sp|Q99M74|KRT82_MOUSE	Q99M74	KRT82_MOUSE	Krt82	Keratin, type II cuticular Hb2	0.724345	-0.465252	0.586732	0.627073
sp|P36916|GNL1_MOUSE	P36916	GNL1_MOUSE	Gnl1	Guanine nucleotide-binding protein-like 1	0.724258	-0.465425	0.586678	0.627073
sp|Q64331|MYO6_MOUSE	Q64331	MYO6_MOUSE	Myo6	Unconventional myosin-VI	0.724169	-0.465602	0.586622	0.627073
sp|P61082|UBC12_MOUSE	P61082	UBC12_MOUSE	Ube2m	NEDD8-conjugating enzyme Ubc12	0.723175	-0.467583	0.585997	0.627073
sp|P49025|CTRO_MOUSE	P49025	CTRO_MOUSE	Cit	Citron Rho-interacting kinase	0.723071	-0.467791	0.585931	0.627073
tr|Q3ULL6|Q3ULL6_MOUSE	Q3ULL6	Q3ULL6_MOUSE	Upf3b	Protein Upf3b	0.722935	-0.468062	0.585845	0.627073
tr|Q5SWP0|Q5SWP0_MOUSE	Q5SWP0	Q5SWP0_MOUSE	Tbrg4	Protein TBRG4 (Fragment)	0.722925	-0.468082	0.585838	0.627073
sp|Q9CPY7|AMPL_MOUSE	Q9CPY7	AMPL_MOUSE	Lap3	Cytosol aminopeptidase	0.722396	-0.469137	0.585503	0.627073
sp|Q8BFR5|EFTU_MOUSE	Q8BFR5	EFTU_MOUSE	Tufm	Elongation factor Tu, mitochondrial	0.721753	-0.470423	0.585093	0.627073
sp|P47753|CAZA1_MOUSE	P47753	CAZA1_MOUSE	Capza1	F-actin-capping protein subunit alpha-1	0.721627	-0.470675	0.585012	0.627073
sp|Q8R5C5|ACTY_MOUSE	Q8R5C5	ACTY_MOUSE	Actr1b	Beta-centractin	0.720477	-0.472977	0.584272	0.627073
tr|Q80ZX0|Q80ZX0_MOUSE	Q80ZX0	Q80ZX0_MOUSE	Sec24b	Protein Sec24b	0.720396	-0.473138	0.58422	0.627073
sp|P11835|ITB2_MOUSE	P11835	ITB2_MOUSE	Itgb2	Integrin beta-2	0.720196	-0.473538	0.584091	0.627073
sp|P97355|SPSY_MOUSE	P97355	SPSY_MOUSE	Sms	Spermine synthase	0.719756	-0.47442	0.583805	0.627073
sp|P63005|LIS1_MOUSE	P63005	LIS1_MOUSE	Pafah1b1	Platelet-activating factor acetylhydrolase IB subunit alpha	0.719749	-0.474435	0.5838	0.627073
tr|E9PYL2|E9PYL2_MOUSE	E9PYL2	E9PYL2_MOUSE	Prr12	Protein Prr12	0.719015	-0.475906	0.583322	0.627073
sp|G3X9C2|FBX50_MOUSE	G3X9C2	FBX50_MOUSE	Nccrp1	F-box only protein 50	0.718492	-0.476956	0.58298	0.627073
sp|Q9CVB6|ARPC2_MOUSE	Q9CVB6	ARPC2_MOUSE	Arpc2	Actin-related protein 2/3 complex subunit 2	0.717887	-0.478171	0.582582	0.627073
sp|Q8CHT0|AL4A1_MOUSE	Q8CHT0	AL4A1_MOUSE	Aldh4a1	Delta-1-pyrroline-5-carboxylate dehydrogenase, mitochondrial	0.717825	-0.478296	0.582541	0.627073
sp|Q91UZ5|IMPA2_MOUSE	Q91UZ5	IMPA2_MOUSE	Impa2	Inositol monophosphatase 2	0.717777	-0.478393	0.582509	0.627073
sp|Q9CZU4|ERAL1_MOUSE	Q9CZU4	ERAL1_MOUSE	Eral1	GTPase Era, mitochondrial	0.716977	-0.480002	0.581979	0.627073
sp|P31254|UBA1Y_MOUSE	P31254	UBA1Y_MOUSE	Uba1y	Ubiquitin-like modifier-activating enzyme 1 Y	0.716277	-0.481411	0.581513	0.627073
sp|P61971|NTF2_MOUSE	P61971	NTF2_MOUSE	Nutf2	Nuclear transport factor 2	0.716269	-0.481427	0.581507	0.627073
sp|Q8C0I1|ADAS_MOUSE	Q8C0I1	ADAS_MOUSE	Agps	Alkyldihydroxyacetonephosphate synthase, peroxisomal	0.71623	-0.481506	0.581481	0.627073
sp|P19324|SERPH_MOUSE	P19324	SERPH_MOUSE	Serpinh1	Serpin H1	0.715686	-0.482602	0.581117	0.627073
sp|P26516|PSMD7_MOUSE	P26516	PSMD7_MOUSE	Psmd7	26S proteasome non-ATPase regulatory subunit 7	0.715431	-0.483115	0.580946	0.627073
sp|P50544|ACADV_MOUSE	P50544	ACADV_MOUSE	Acadvl	Very long-chain specific acyl-CoA dehydrogenase, mitochondrial	0.715425	-0.483128	0.580942	0.627073
sp|Q8VHR5|P66B_MOUSE	Q8VHR5	P66B_MOUSE	Gatad2b	Transcriptional repressor p66-beta	0.715347	-0.483285	0.580889	0.627073
sp|O08808|DIAP1_MOUSE	O08808	DIAP1_MOUSE	Diaph1	Protein diaphanous homolog 1	0.715199	-0.483583	0.580789	0.627073
sp|D3Z7P3|GLSK_MOUSE	D3Z7P3	GLSK_MOUSE	Gls	Glutaminase kidney isoform, mitochondrial	0.715039	-0.483906	0.580682	0.627073
sp|Q6ZQ58|LARP1_MOUSE	Q6ZQ58	LARP1_MOUSE	Larp1	La-related protein 1	0.715015	-0.483954	0.580666	0.627073
sp|Q3ULJ0|GPD1L_MOUSE	Q3ULJ0	GPD1L_MOUSE	Gpd1l	Glycerol-3-phosphate dehydrogenase 1-like protein	0.714561	-0.484871	0.580359	0.627073
sp|Q9ERK4|XPO2_MOUSE	Q9ERK4	XPO2_MOUSE	Cse1l	Exportin-2	0.714372	-0.485253	0.580231	0.627073
sp|P62960|YBOX1_MOUSE	P62960	YBOX1_MOUSE	Ybx1	Nuclease-sensitive element-binding protein 1	0.714219	-0.485561	0.580127	0.627073
sp|P97384|ANX11_MOUSE	P97384	ANX11_MOUSE	Anxa11	Annexin A11	0.714131	-0.485739	0.580067	0.627073
sp|Q62172|RBP1_MOUSE	Q62172	RBP1_MOUSE	Ralbp1	RalA-binding protein 1	0.714107	-0.485788	0.580051	0.627073
sp|Q9CWU2|ZDH13_MOUSE	Q9CWU2	ZDH13_MOUSE	Zdhhc13	Palmitoyltransferase ZDHHC13	0.713444	-0.487128	0.579599	0.627073
sp|P46660|AINX_MOUSE	P46660	AINX_MOUSE	Ina	Alpha-internexin	0.713165	-0.487692	0.579408	0.627073
sp|P09671|SODM_MOUSE	P09671	SODM_MOUSE	Sod2	Superoxide dismutase [Mn], mitochondrial	0.713126	-0.487771	0.579382	0.627073
sp|Q9D6F9|TBB4A_MOUSE	Q9D6F9	TBB4A_MOUSE	Tubb4a	Tubulin beta-4A chain	0.71311	-0.487804	0.57937	0.627073
sp|P97855|G3BP1_MOUSE	P97855	G3BP1_MOUSE	G3bp1	Ras GTPase-activating protein-binding protein 1	0.712027	-0.489996	0.578626	0.627073
sp|P51175|PPOX_MOUSE	P51175	PPOX_MOUSE	Ppox	Protoporphyrinogen oxidase	0.711788	-0.49048	0.578461	0.627073
sp|Q80X90|FLNB_MOUSE	Q80X90	FLNB_MOUSE	Flnb	Filamin-B	0.71177	-0.490518	0.578448	0.627073
sp|P56812|PDCD5_MOUSE	P56812	PDCD5_MOUSE	Pdcd5	Programmed cell death protein 5	0.710568	-0.492956	0.577613	0.627073
sp|Q03265|ATPA_MOUSE	Q03265	ATPA_MOUSE	Atp5a1	ATP synthase subunit alpha, mitochondrial	0.710565	-0.492962	0.57761	0.627073
sp|Q9JHS4|CLPX_MOUSE	Q9JHS4	CLPX_MOUSE	Clpx	ATP-dependent Clp protease ATP-binding subunit clpX-like, mitochondrial	0.709305	-0.495521	0.576727	0.627073
sp|Q8BY89|CTL2_MOUSE	Q8BY89	CTL2_MOUSE	Slc44a2	Choline transporter-like protein 2	0.709206	-0.495724	0.576657	0.627073
sp|Q9JK81|MYG1_MOUSE	Q9JK81	MYG1_MOUSE	Myg1	UPF0160 protein MYG1, mitochondrial	0.7086	-0.496956	0.576229	0.627073
sp|Q6PGB6|NAA50_MOUSE	Q6PGB6	NAA50_MOUSE	Naa50	N-alpha-acetyltransferase 50	0.708528	-0.497104	0.576177	0.627073
sp|Q3V3R1|C1TM_MOUSE	Q3V3R1	C1TM_MOUSE	Mthfd1l	Monofunctional C1-tetrahydrofolate synthase, mitochondrial	0.708394	-0.497375	0.576083	0.627073
sp|Q99JZ7|ERRFI_MOUSE	Q99JZ7	ERRFI_MOUSE	Errfi1	ERBB receptor feedback inhibitor 1	0.708016	-0.498146	0.575814	0.627073
sp|P47857|K6PF_MOUSE	P47857	K6PF_MOUSE	Pfkm	ATP-dependent 6-phosphofructokinase, muscle type	0.707893	-0.498397	0.575726	0.627073
sp|P24547|IMDH2_MOUSE	P24547	IMDH2_MOUSE	Impdh2	Inosine-5'-monophosphate dehydrogenase 2	0.70741	-0.499382	0.575382	0.627073
sp|O88379|BAZ1A_MOUSE	O88379	BAZ1A_MOUSE	Baz1a	Bromodomain adjacent to zinc finger domain protein 1A	0.707295	-0.499616	0.575299	0.627073
sp|Q9JLF6|TGM1_MOUSE	Q9JLF6	TGM1_MOUSE	Tgm1	Protein-glutamine gamma-glutamyltransferase K	0.70669	-0.50085	0.574866	0.627073
sp|Q99LC5|ETFA_MOUSE	Q99LC5	ETFA_MOUSE	Etfa	Electron transfer flavoprotein subunit alpha, mitochondrial	0.706652	-0.500929	0.574838	0.627073
sp|P84078|ARF1_MOUSE	P84078	ARF1_MOUSE	Arf1	ADP-ribosylation factor 1	0.70654	-0.501158	0.574758	0.627073
sp|P42227|STAT3_MOUSE	P42227	STAT3_MOUSE	Stat3	Signal transducer and activator of transcription 3	0.706493	-0.501253	0.574724	0.627073
sp|P51881|ADT2_MOUSE	P51881	ADT2_MOUSE	Slc25a5	ADP/ATP translocase 2	0.70637	-0.501504	0.574636	0.627073
sp|O88685|PRS6A_MOUSE	O88685	PRS6A_MOUSE	Psmc3	26S protease regulatory subunit 6A	0.706166	-0.50192	0.574489	0.627073
sp|P09055|ITB1_MOUSE	P09055	ITB1_MOUSE	Itgb1	Integrin beta-1	0.705581	-0.503117	0.574065	0.627073
tr|E9PUQ3|E9PUQ3_MOUSE	E9PUQ3	E9PUQ3_MOUSE	AU019823	Protein AU019823	0.705531	-0.503218	0.574029	0.627073
sp|P21300|ALD1_MOUSE	P21300	ALD1_MOUSE	Akr1b7	Aldose reductase-related protein 1	0.705405	-0.503476	0.573938	0.627073
sp|Q5SYD0|MYO1D_MOUSE	Q5SYD0	MYO1D_MOUSE	Myo1d	Unconventional myosin-Id	0.705259	-0.503776	0.573832	0.627073
sp|P62264|RS14_MOUSE	P62264	RS14_MOUSE	Rps14	40S ribosomal protein S14	0.705209	-0.503877	0.573796	0.627073
sp|Q8K2F8|LS14A_MOUSE	Q8K2F8	LS14A_MOUSE	Lsm14a	Protein LSM14 homolog A	0.705152	-0.503994	0.573754	0.627073
sp|Q61171|PRDX2_MOUSE	Q61171	PRDX2_MOUSE	Prdx2	Peroxiredoxin-2	0.704762	-0.504791	0.573471	0.627073
sp|P51660|DHB4_MOUSE	P51660	DHB4_MOUSE	Hsd17b4	Peroxisomal multifunctional enzyme type 2	0.704469	-0.505391	0.573257	0.627073
sp|Q99LJ0|CT2NL_MOUSE	Q99LJ0	CT2NL_MOUSE	Cttnbp2nl	CTTNBP2 N-terminal-like protein	0.704455	-0.50542	0.573247	0.627073
sp|Q8BTM8|FLNA_MOUSE	Q8BTM8	FLNA_MOUSE	Flna	Filamin-A	0.70439	-0.505553	0.573199	0.627073
sp|Q9CZ62|CEP97_MOUSE	Q9CZ62	CEP97_MOUSE	Cep97	Centrosomal protein of 97 kDa	0.704116	-0.506115	0.572999	0.627073
sp|Q0P678|ZCH18_MOUSE	Q0P678	ZCH18_MOUSE	Zc3h18	Zinc finger CCCH domain-containing protein 18	0.70381	-0.506743	0.572774	0.627073
sp|Q8R0X7|SGPL1_MOUSE	Q8R0X7	SGPL1_MOUSE	Sgpl1	Sphingosine-1-phosphate lyase 1	0.703734	-0.506899	0.572718	0.627073
sp|Q9R0H0|ACOX1_MOUSE	Q9R0H0	ACOX1_MOUSE	Acox1	Peroxisomal acyl-coenzyme A oxidase 1	0.703589	-0.507196	0.572612	0.627073
sp|P97305|NFAC3_MOUSE	P97305	NFAC3_MOUSE	Nfatc3	Nuclear factor of activated T-cells, cytoplasmic 3	0.703562	-0.50725	0.572592	0.627073
sp|Q9JJG9|NOA1_MOUSE	Q9JJG9	NOA1_MOUSE	Noa1	Nitric oxide-associated protein 1	0.703496	-0.507386	0.572543	0.627073
sp|Q8CI51|PDLI5_MOUSE	Q8CI51	PDLI5_MOUSE	Pdlim5	PDZ and LIM domain protein 5	0.7028	-0.508814	0.57203	0.627073
sp|Q8R2Q4|RRF2M_MOUSE	Q8R2Q4	RRF2M_MOUSE	Gfm2	Ribosome-releasing factor 2, mitochondrial	0.702737	-0.508944	0.571983	0.627073
sp|Q9D7N3|RT09_MOUSE	Q9D7N3	RT09_MOUSE	Mrps9	28S ribosomal protein S9, mitochondrial	0.702677	-0.509067	0.571939	0.627073
sp|Q9EQ20|MMSA_MOUSE	Q9EQ20	MMSA_MOUSE	Aldh6a1	Methylmalonate-semialdehyde dehydrogenase [acylating], mitochondrial	0.701825	-0.510818	0.571307	0.627073
sp|Q9R1P4|PSA1_MOUSE	Q9R1P4	PSA1_MOUSE	Psma1	Proteasome subunit alpha type-1	0.70181	-0.510848	0.571296	0.627073
sp|Q64475|H2B1B_MOUSE	Q64475	H2B1B_MOUSE	Hist1h2bb	Histone H2B type 1-B	0.701783	-0.510903	0.571276	0.627073
sp|Q91Y86|MK08_MOUSE	Q91Y86	MK08_MOUSE	Mapk8	Mitogen-activated protein kinase 8	0.701717	-0.511039	0.571227	0.627073
sp|Q9CQN1|TRAP1_MOUSE	Q9CQN1	TRAP1_MOUSE	Trap1	Heat shock protein 75 kDa, mitochondrial	0.701571	-0.51134	0.571118	0.627073
sp|Q9WUA3|K6PP_MOUSE	Q9WUA3	K6PP_MOUSE	Pfkp	ATP-dependent 6-phosphofructokinase, platelet type	0.701518	-0.511449	0.571078	0.627073
sp|Q9D819|IPYR_MOUSE	Q9D819	IPYR_MOUSE	Ppa1	Inorganic pyrophosphatase	0.700592	-0.513354	0.570385	0.627073
sp|Q7TQH0|ATX2L_MOUSE	Q7TQH0	ATX2L_MOUSE	Atxn2l	Ataxin-2-like protein	0.700427	-0.513694	0.570261	0.627073
sp|Q01853|TERA_MOUSE	Q01853	TERA_MOUSE	Vcp	Transitional endoplasmic reticulum ATPase	0.699792	-0.515002	0.569783	0.627073
sp|P48725|PCNT_MOUSE	P48725	PCNT_MOUSE	Pcnt	Pericentrin	0.699346	-0.515922	0.569445	0.627073
sp|Q99P31|HPBP1_MOUSE	Q99P31	HPBP1_MOUSE	Hspbp1	Hsp70-binding protein 1	0.699315	-0.515986	0.569422	0.627073
sp|Q8BVI4|DHPR_MOUSE	Q8BVI4	DHPR_MOUSE	Qdpr	Dihydropteridine reductase	0.699295	-0.516027	0.569407	0.627073
sp|Q9WV30|NFAT5_MOUSE	Q9WV30	NFAT5_MOUSE	Nfat5	Nuclear factor of activated T-cells 5	0.698962	-0.516714	0.569154	0.627073
sp|Q9D3D9|ATPD_MOUSE	Q9D3D9	ATPD_MOUSE	Atp5d	ATP synthase subunit delta, mitochondrial	0.698781	-0.517088	0.569017	0.627073
sp|Q9Z2I9|SUCB1_MOUSE	Q9Z2I9	SUCB1_MOUSE	Sucla2	Succinyl-CoA ligase [ADP-forming] subunit beta, mitochondrial	0.698323	-0.518033	0.568668	0.627073
sp|Q62448|IF4G2_MOUSE	Q62448	IF4G2_MOUSE	Eif4g2	Eukaryotic translation initiation factor 4 gamma 2	0.69785	-0.51901	0.568307	0.627073
sp|P46061|RAGP1_MOUSE	P46061	RAGP1_MOUSE	Rangap1	Ran GTPase-activating protein 1	0.6976	-0.519529	0.568115	0.627073
sp|P63325|RS10_MOUSE	P63325	RS10_MOUSE	Rps10	40S ribosomal protein S10	0.697475	-0.519787	0.568019	0.627073
sp|Q6P1G2|KDM2B_MOUSE	Q6P1G2	KDM2B_MOUSE	Kdm2b	Lysine-specific demethylase 2B	0.697382	-0.519979	0.567947	0.627073
tr|A8DUK4|A8DUK4_MOUSE	A8DUK4	A8DUK4_MOUSE	Hbbt1	Beta-globin	0.697115	-0.520532	0.567742	0.627073
sp|P11679|K2C8_MOUSE	P11679	K2C8_MOUSE	Krt8	Keratin, type II cytoskeletal 8	0.696915	-0.520946	0.567588	0.627073
sp|Q9D0R2|SYTC_MOUSE	Q9D0R2	SYTC_MOUSE	Tars	Threonine--tRNA ligase, cytoplasmic	0.696232	-0.52236	0.567061	0.627073
sp|P11031|TCP4_MOUSE	P11031	TCP4_MOUSE	Sub1	Activated RNA polymerase II transcriptional coactivator p15	0.696079	-0.522678	0.566942	0.627073
sp|P70698|PYRG1_MOUSE	P70698	PYRG1_MOUSE	Ctps1	CTP synthase 1	0.696009	-0.522822	0.566888	0.627073
sp|Q6PAM1|TXLNA_MOUSE	Q6PAM1	TXLNA_MOUSE	Txlna	Alpha-taxilin	0.695646	-0.523574	0.566607	0.627073
sp|Q8BMF4|ODP2_MOUSE	Q8BMF4	ODP2_MOUSE	Dlat	Dihydrolipoyllysine-residue acetyltransferase component of pyruvate dehydrogenase complex, mitochondrial	0.694671	-0.525599	0.565846	0.627073
sp|Q9CQA3|DHSB_MOUSE	Q9CQA3	DHSB_MOUSE	Sdhb	Succinate dehydrogenase [ubiquinone] iron-sulfur subunit, mitochondrial	0.694505	-0.525944	0.565716	0.627073
sp|Q3TZZ7|ESYT2_MOUSE	Q3TZZ7	ESYT2_MOUSE	Esyt2	Extended synaptotagmin-2	0.694463	-0.52603	0.565684	0.627073
sp|O88738|BIRC6_MOUSE	O88738	BIRC6_MOUSE	Birc6	Baculoviral IAP repeat-containing protein 6	0.694391	-0.526181	0.565626	0.627073
sp|Q91XC0|AJUBA_MOUSE	Q91XC0	AJUBA_MOUSE	Ajuba	LIM domain-containing protein ajuba	0.694171	-0.526637	0.565454	0.627073
sp|P35492|HUTH_MOUSE	P35492	HUTH_MOUSE	Hal	Histidine ammonia-lyase	0.694155	-0.526671	0.565441	0.627073
sp|Q91YN5|UAP1_MOUSE	Q91YN5	UAP1_MOUSE	Uap1	UDP-N-acetylhexosamine pyrophosphorylase	0.694153	-0.526675	0.56544	0.627073
sp|P56399|UBP5_MOUSE	P56399	UBP5_MOUSE	Usp5	Ubiquitin carboxyl-terminal hydrolase 5	0.694092	-0.526801	0.565392	0.627073
sp|Q7TMY8|HUWE1_MOUSE	Q7TMY8	HUWE1_MOUSE	Huwe1	E3 ubiquitin-protein ligase HUWE1	0.693793	-0.527422	0.565158	0.627073
sp|Q9WTP6|KAD2_MOUSE	Q9WTP6	KAD2_MOUSE	Ak2	Adenylate kinase 2, mitochondrial	0.693386	-0.528269	0.564836	0.627073
sp|P58252|EF2_MOUSE	P58252	EF2_MOUSE	Eef2	Elongation factor 2	0.693244	-0.528565	0.564724	0.627073
sp|P63158|HMGB1_MOUSE	P63158	HMGB1_MOUSE	Hmgb1	High mobility group protein B1	0.693061	-0.528945	0.56458	0.627073
sp|Q8K0D0|CDK17_MOUSE	Q8K0D0	CDK17_MOUSE	Cdk17	Cyclin-dependent kinase 17	0.692227	-0.530682	0.563919	0.627073
sp|Q8K2T1|NMRL1_MOUSE	Q8K2T1	NMRL1_MOUSE	Nmral1	NmrA-like family domain-containing protein 1	0.692192	-0.530756	0.563891	0.627073
sp|Q99JY0|ECHB_MOUSE	Q99JY0	ECHB_MOUSE	Hadhb	Trifunctional enzyme subunit beta, mitochondrial	0.692191	-0.530758	0.56389	0.627073
sp|P27546|MAP4_MOUSE	P27546	MAP4_MOUSE	Map4	Microtubule-associated protein 4	0.692017	-0.531122	0.563751	0.627073
sp|P63242|IF5A1_MOUSE	P63242	IF5A1_MOUSE	Eif5a	Eukaryotic translation initiation factor 5A-1	0.691649	-0.531888	0.563458	0.627073
sp|Q80X50|UBP2L_MOUSE	Q80X50	UBP2L_MOUSE	Ubap2l	Ubiquitin-associated protein 2-like	0.691127	-0.532977	0.56304	0.627073
sp|P28352|APEX1_MOUSE	P28352	APEX1_MOUSE	Apex1	DNA-(apurinic or apyrimidinic site) lyase	0.691094	-0.533046	0.563014	0.627073
sp|O70400|PDLI1_MOUSE	O70400	PDLI1_MOUSE	Pdlim1	PDZ and LIM domain protein 1	0.690665	-0.533941	0.56267	0.627073
sp|Q99NH0|ANR17_MOUSE	Q99NH0	ANR17_MOUSE	Ankrd17	Ankyrin repeat domain-containing protein 17	0.689978	-0.535379	0.562116	0.627073
sp|P60710|ACTB_MOUSE	P60710	ACTB_MOUSE	Actb	Actin, cytoplasmic 1	0.689839	-0.535667	0.562004	0.627073
sp|P70670|NACAM_MOUSE	P70670	NACAM_MOUSE	Naca	Nascent polypeptide-associated complex subunit alpha, muscle-specific form	0.689135	-0.537141	0.561434	0.627073
sp|Q4V9W2|SR1IP_MOUSE	Q4V9W2	SR1IP_MOUSE	Srek1ip1	Protein SREK1IP1	0.688686	-0.538083	0.561069	0.627073
sp|Q3UH60|DIP2B_MOUSE	Q3UH60	DIP2B_MOUSE	Dip2b	Disco-interacting protein 2 homolog B	0.688504	-0.538463	0.560921	0.627073
sp|Q8VCW8|ACSF2_MOUSE	Q8VCW8	ACSF2_MOUSE	Acsf2	Acyl-CoA synthetase family member 2, mitochondrial	0.687142	-0.541319	0.559806	0.627073
sp|Q9DBJ1|PGAM1_MOUSE	Q9DBJ1	PGAM1_MOUSE	Pgam1	Phosphoglycerate mutase 1	0.686956	-0.541711	0.559652	0.627073
tr|Q99N15|Q99N15_MOUSE	Q99N15	Q99N15_MOUSE	Hsd17b10	17beta-hydroxysteroid dehydrogenase type 10/short chain L-3-hydroxyacyl-CoA dehydrogenase	0.686787	-0.542065	0.559514	0.627073
sp|Q3TKT4|SMCA4_MOUSE	Q3TKT4	SMCA4_MOUSE	Smarca4	Transcription activator BRG1	0.686267	-0.543158	0.559084	0.627073
sp|Q922E6|FAKD2_MOUSE	Q922E6	FAKD2_MOUSE	Fastkd2	FAST kinase domain-containing protein 2	0.685986	-0.543749	0.558852	0.627073
sp|Q80UU9|PGRC2_MOUSE	Q80UU9	PGRC2_MOUSE	Pgrmc2	Membrane-associated progesterone receptor component 2	0.685292	-0.545209	0.558275	0.627073
tr|A7UAK5|A7UAK5_MOUSE	A7UAK5	A7UAK5_MOUSE	Pfkfb3	6-phosphofructo-2-kinase/fructose-2, 6-biphosphatase 3 splice variant 2	0.684738	-0.546376	0.557813	0.627073
sp|Q9DCH4|EIF3F_MOUSE	Q9DCH4	EIF3F_MOUSE	Eif3f	Eukaryotic translation initiation factor 3 subunit F	0.684695	-0.546467	0.557777	0.627073
sp|Q2KN98|CYTSA_MOUSE	Q2KN98	CYTSA_MOUSE	Specc1l	Cytospin-A	0.684213	-0.547483	0.557374	0.627073
sp|Q8BH04|PCKGM_MOUSE	Q8BH04	PCKGM_MOUSE	Pck2	Phosphoenolpyruvate carboxykinase [GTP], mitochondrial	0.6839	-0.548142	0.557112	0.627073
sp|Q60875|ARHG2_MOUSE	Q60875	ARHG2_MOUSE	Arhgef2	Rho guanine nucleotide exchange factor 2	0.683737	-0.548487	0.556975	0.627073
sp|P55258|RAB8A_MOUSE	P55258	RAB8A_MOUSE	Rab8a	Ras-related protein Rab-8A	0.683406	-0.549185	0.556696	0.627073
sp|Q14CH7|SYAM_MOUSE	Q14CH7	SYAM_MOUSE	Aars2	Alanine--tRNA ligase, mitochondrial	0.68325	-0.549514	0.556565	0.627073
sp|Q6Y5D8|RHG10_MOUSE	Q6Y5D8	RHG10_MOUSE	Arhgap10	Rho GTPase-activating protein 10	0.683136	-0.549756	0.556469	0.627073
sp|P32261|ANT3_MOUSE	P32261	ANT3_MOUSE	Serpinc1	Antithrombin-III	0.682631	-0.550822	0.556042	0.627073
sp|Q505F5|LRC47_MOUSE	Q505F5	LRC47_MOUSE	Lrrc47	Leucine-rich repeat-containing protein 47	0.681758	-0.552668	0.555302	0.627073
sp|Q8R050|ERF3A_MOUSE	Q8R050	ERF3A_MOUSE	Gspt1	Eukaryotic peptide chain release factor GTP-binding subunit ERF3A	0.680744	-0.554816	0.554436	0.627073
sp|O55029|COPB2_MOUSE	O55029	COPB2_MOUSE	Copb2	Coatomer subunit beta'	0.679838	-0.556738	0.553657	0.627073
sp|Q6P5E6|GGA2_MOUSE	Q6P5E6	GGA2_MOUSE	Gga2	ADP-ribosylation factor-binding protein GGA2	0.679607	-0.557227	0.553459	0.627073
sp|P08249|MDHM_MOUSE	P08249	MDHM_MOUSE	Mdh2	Malate dehydrogenase, mitochondrial	0.679598	-0.557247	0.553451	0.627073
sp|P67984|RL22_MOUSE	P67984	RL22_MOUSE	Rpl22	60S ribosomal protein L22	0.679496	-0.557464	0.553363	0.627073
sp|P62827|RAN_MOUSE	P62827	RAN_MOUSE	Ran	GTP-binding nuclear protein Ran	0.678239	-0.560135	0.552274	0.627073
sp|O55142|RL35A_MOUSE	O55142	RL35A_MOUSE	Rpl35a	60S ribosomal protein L35a	0.677431	-0.561855	0.55157	0.627073
tr|G3X8Y3|G3X8Y3_MOUSE	G3X8Y3	G3X8Y3_MOUSE	Naa15	N-alpha-acetyltransferase 15, NatA auxiliary subunit	0.676482	-0.563878	0.550738	0.627073
sp|Q61733|RT31_MOUSE	Q61733	RT31_MOUSE	Mrps31	28S ribosomal protein S31, mitochondrial	0.67633	-0.564202	0.550604	0.627073
sp|Q9EPQ8|TCF20_MOUSE	Q9EPQ8	TCF20_MOUSE	Tcf20	Transcription factor 20	0.675737	-0.565466	0.550082	0.627073
sp|Q69ZA1|CDK13_MOUSE	Q69ZA1	CDK13_MOUSE	Cdk13	Cyclin-dependent kinase 13	0.675632	-0.565691	0.549989	0.627073
sp|O88696|CLPP_MOUSE	O88696	CLPP_MOUSE	Clpp	ATP-dependent Clp protease proteolytic subunit, mitochondrial	0.675492	-0.56599	0.549865	0.627073
sp|Q7M6Y3|PICAL_MOUSE	Q7M6Y3	PICAL_MOUSE	Picalm	Phosphatidylinositol-binding clathrin assembly protein	0.675225	-0.56656	0.549629	0.627073
sp|P62270|RS18_MOUSE	P62270	RS18_MOUSE	Rps18	40S ribosomal protein S18	0.675047	-0.566939	0.549472	0.627073
sp|O09110|MP2K3_MOUSE	O09110	MP2K3_MOUSE	Map2k3	Dual specificity mitogen-activated protein kinase kinase 3	0.674985	-0.567072	0.549417	0.627073
sp|Q8K3F7|TDH_MOUSE	Q8K3F7	TDH_MOUSE	Tdh	L-threonine 3-dehydrogenase, mitochondrial	0.674728	-0.567623	0.549188	0.627073
sp|Q8R0W0|EPIPL_MOUSE	Q8R0W0	EPIPL_MOUSE	Eppk1	Epiplakin	0.67452	-0.568066	0.549004	0.627073
sp|Q76MZ3|2AAA_MOUSE	Q76MZ3	2AAA_MOUSE	Ppp2r1a	Serine/threonine-protein phosphatase 2A 65 kDa regulatory subunit A alpha isoform	0.674136	-0.568888	0.548662	0.627073
sp|Q8CGK3|LONM_MOUSE	Q8CGK3	LONM_MOUSE	Lonp1	Lon protease homolog, mitochondrial	0.67387	-0.569457	0.548425	0.627073
sp|Q8CD92|TTC27_MOUSE	Q8CD92	TTC27_MOUSE	Ttc27	Tetratricopeptide repeat protein 27	0.673591	-0.570056	0.548175	0.627073
sp|P61460|DEPD5_MOUSE	P61460	DEPD5_MOUSE	Depdc5	DEP domain-containing protein 5	0.673441	-0.570377	0.548041	0.627073
sp|Q60759|GCDH_MOUSE	Q60759	GCDH_MOUSE	Gcdh	Glutaryl-CoA dehydrogenase, mitochondrial	0.673428	-0.570405	0.548029	0.627073
sp|P35569|IRS1_MOUSE	P35569	IRS1_MOUSE	Irs1	Insulin receptor substrate 1	0.672928	-0.571475	0.547582	0.627073
sp|Q3TWI9|TM63B_MOUSE	Q3TWI9	TM63B_MOUSE	Tmem63b	CSC1-like protein 2	0.672851	-0.571641	0.547512	0.627073
sp|P62862|RS30_MOUSE	P62862	RS30_MOUSE	Fau	40S ribosomal protein S30	0.672385	-0.57264	0.547093	0.627073
sp|Q9R1P1|PSB3_MOUSE	Q9R1P1	PSB3_MOUSE	Psmb3	Proteasome subunit beta type-3	0.67231	-0.572801	0.547026	0.627073
sp|P55097|CATK_MOUSE	P55097	CATK_MOUSE	Ctsk	Cathepsin K	0.672017	-0.57343	0.546761	0.627073
sp|Q91Z49|UIF_MOUSE	Q91Z49	UIF_MOUSE	Fyttd1	UAP56-interacting factor	0.671763	-0.573976	0.546532	0.627073
sp|Q8CFI0|NED4L_MOUSE	Q8CFI0	NED4L_MOUSE	Nedd4l	E3 ubiquitin-protein ligase NEDD4-like	0.671666	-0.574184	0.546444	0.627073
sp|Q91VD9|NDUS1_MOUSE	Q91VD9	NDUS1_MOUSE	Ndufs1	NADH-ubiquinone oxidoreductase 75 kDa subunit, mitochondrial	0.671489	-0.574565	0.546284	0.627073
sp|P47941|CRKL_MOUSE	P47941	CRKL_MOUSE	Crkl	Crk-like protein	0.671273	-0.575028	0.546089	0.627073
sp|Q9CZE3|RAB32_MOUSE	Q9CZE3	RAB32_MOUSE	Rab32	Ras-related protein Rab-32	0.671015	-0.575584	0.545854	0.627073
sp|Q8BY87|UBP47_MOUSE	Q8BY87	UBP47_MOUSE	Usp47	Ubiquitin carboxyl-terminal hydrolase 47	0.670092	-0.57757	0.545014	0.627073
sp|O35343|IMA3_MOUSE	O35343	IMA3_MOUSE	Kpna4	Importin subunit alpha-3	0.670022	-0.577719	0.54495	0.627073
sp|Q8C7R4|UBA6_MOUSE	Q8C7R4	UBA6_MOUSE	Uba6	Ubiquitin-like modifier-activating enzyme 6	0.669843	-0.578105	0.544787	0.627073
sp|P68254|1433T_MOUSE	P68254	1433T_MOUSE	Ywhaq	14-3-3 protein theta	0.669466	-0.578918	0.544442	0.627073
sp|Q571F8|GLSL_MOUSE	Q571F8	GLSL_MOUSE	Gls2	Glutaminase liver isoform, mitochondrial	0.669403	-0.579054	0.544384	0.627073
sp|Q6P9L6|KIF15_MOUSE	Q6P9L6	KIF15_MOUSE	Kif15	Kinesin-like protein KIF15	0.668733	-0.580497	0.543769	0.627073
sp|Q80XI3|IF4G3_MOUSE	Q80XI3	IF4G3_MOUSE	Eif4g3	Eukaryotic translation initiation factor 4 gamma 3	0.668441	-0.581129	0.5435	0.627073
sp|Q9JIF7|COPB_MOUSE	Q9JIF7	COPB_MOUSE	Copb1	Coatomer subunit beta	0.667753	-0.582614	0.542865	0.627073
sp|Q01405|SC23A_MOUSE	Q01405	SC23A_MOUSE	Sec23a	Protein transport protein Sec23A	0.667742	-0.582637	0.542855	0.627073
sp|P59999|ARPC4_MOUSE	P59999	ARPC4_MOUSE	Arpc4	Actin-related protein 2/3 complex subunit 4	0.667414	-0.583347	0.542551	0.627073
sp|Q8K0Z7|TACO1_MOUSE	Q8K0Z7	TACO1_MOUSE	Taco1	Translational activator of cytochrome c oxidase 1	0.666858	-0.584548	0.542035	0.627073
sp|Q9D620|RFIP1_MOUSE	Q9D620	RFIP1_MOUSE	Rab11fip1	Rab11 family-interacting protein 1	0.666787	-0.584702	0.541969	0.627073
sp|Q7TSQ8|PDPR_MOUSE	Q7TSQ8	PDPR_MOUSE	Pdpr	Pyruvate dehydrogenase phosphatase regulatory subunit, mitochondrial	0.666156	-0.586069	0.541381	0.627073
sp|Q3THS6|METK2_MOUSE	Q3THS6	METK2_MOUSE	Mat2a	S-adenosylmethionine synthase isoform type-2	0.666054	-0.586288	0.541286	0.627073
sp|Q9R1P3|PSB2_MOUSE	Q9R1P3	PSB2_MOUSE	Psmb2	Proteasome subunit beta type-2	0.666032	-0.586337	0.541265	0.627073
sp|Q60864|STIP1_MOUSE	Q60864	STIP1_MOUSE	Stip1	Stress-induced-phosphoprotein 1	0.665594	-0.587287	0.540855	0.627073
sp|P45952|ACADM_MOUSE	P45952	ACADM_MOUSE	Acadm	Medium-chain specific acyl-CoA dehydrogenase, mitochondrial	0.665488	-0.587516	0.540756	0.627073
sp|Q61739|ITA6_MOUSE	Q61739	ITA6_MOUSE	Itga6	Integrin alpha-6	0.664425	-0.589821	0.539758	0.627073
tr|D3YWT1|D3YWT1_MOUSE	D3YWT1	D3YWT1_MOUSE	Hnrnph3	MCG11326, isoform CRA_b	0.664043	-0.590651	0.539397	0.627073
sp|Q80YS6|AFAP1_MOUSE	Q80YS6	AFAP1_MOUSE	Afap1	Actin filament-associated protein 1	0.663773	-0.591237	0.539142	0.627073
sp|P61982|1433G_MOUSE	P61982	1433G_MOUSE	Ywhag	14-3-3 protein gamma	0.662215	-0.594628	0.537662	0.627073
sp|Q9JHU4|DYHC1_MOUSE	Q9JHU4	DYHC1_MOUSE	Dync1h1	Cytoplasmic dynein 1 heavy chain 1	0.662017	-0.595059	0.537473	0.627073
sp|O35129|PHB2_MOUSE	O35129	PHB2_MOUSE	Phb2	Prohibitin-2	0.661545	-0.59609	0.537021	0.627073
sp|Q61187|TS101_MOUSE	Q61187	TS101_MOUSE	Tsg101	Tumor susceptibility gene 101 protein	0.661403	-0.596398	0.536885	0.627073
sp|Q61543|GSLG1_MOUSE	Q61543	GSLG1_MOUSE	Glg1	Golgi apparatus protein 1	0.661293	-0.596638	0.53678	0.627073
tr|Q6ZWQ7|Q6ZWQ7_MOUSE	Q6ZWQ7	Q6ZWQ7_MOUSE	Spcs3	Signal peptidase complex subunit 3	0.661101	-0.597058	0.536595	0.627073
sp|Q9Z2U1|PSA5_MOUSE	Q9Z2U1	PSA5_MOUSE	Psma5	Proteasome subunit alpha type-5	0.661024	-0.597226	0.536521	0.627073
sp|P50247|SAHH_MOUSE	P50247	SAHH_MOUSE	Ahcy	Adenosylhomocysteinase	0.661001	-0.597277	0.536499	0.627073
sp|P14576|SRP54_MOUSE	P14576	SRP54_MOUSE	Srp54	Signal recognition particle 54 kDa protein	0.660942	-0.597405	0.536442	0.627073
sp|P08556|RASN_MOUSE	P08556	RASN_MOUSE	Nras	GTPase NRas	0.660806	-0.597702	0.536311	0.627073
sp|P54775|PRS6B_MOUSE	P54775	PRS6B_MOUSE	Psmc4	26S protease regulatory subunit 6B	0.659977	-0.599512	0.535513	0.627073
sp|Q9JKF1|IQGA1_MOUSE	Q9JKF1	IQGA1_MOUSE	Iqgap1	Ras GTPase-activating-like protein IQGAP1	0.659967	-0.599535	0.535503	0.627073
sp|Q91WR5|AK1CL_MOUSE	Q91WR5	AK1CL_MOUSE	Akr1c21	Aldo-keto reductase family 1 member C21	0.659965	-0.599538	0.535501	0.627073
sp|O08547|SC22B_MOUSE	O08547	SC22B_MOUSE	Sec22b	Vesicle-trafficking protein SEC22b	0.659649	-0.600229	0.535196	0.627073
sp|Q6PAM0|AAKB2_MOUSE	Q6PAM0	AAKB2_MOUSE	Prkab2	5'-AMP-activated protein kinase subunit beta-2	0.659595	-0.600348	0.535143	0.627073
sp|Q80U95|UBE3C_MOUSE	Q80U95	UBE3C_MOUSE	Ube3c	Ubiquitin-protein ligase E3C	0.659222	-0.601165	0.534782	0.627073
sp|P60766|CDC42_MOUSE	P60766	CDC42_MOUSE	Cdc42	Cell division control protein 42 homolog	0.65886	-0.601956	0.534431	0.627073
sp|Q61216|MRE11_MOUSE	Q61216	MRE11_MOUSE	Mre11a	Double-strand break repair protein MRE11A	0.658846	-0.601986	0.534417	0.627073
sp|P35293|RAB18_MOUSE	P35293	RAB18_MOUSE	Rab18	Ras-related protein Rab-18	0.658782	-0.602127	0.534355	0.627073
sp|Q91WT8|RBM47_MOUSE	Q91WT8	RBM47_MOUSE	Rbm47	RNA-binding protein 47	0.658756	-0.602183	0.53433	0.627073
sp|Q9ESC8|AFF4_MOUSE	Q9ESC8	AFF4_MOUSE	Aff4	AF4/FMR2 family member 4	0.658148	-0.603516	0.533737	0.627073
sp|P11499|HS90B_MOUSE	P11499	HS90B_MOUSE	Hsp90ab1	Heat shock protein HSP 90-beta	0.657121	-0.60577	0.532733	0.627073
sp|Q9CWJ9|PUR9_MOUSE	Q9CWJ9	PUR9_MOUSE	Atic	Bifunctional purine biosynthesis protein PURH	0.657066	-0.605889	0.532679	0.627073
sp|P46471|PRS7_MOUSE	P46471	PRS7_MOUSE	Psmc2	26S protease regulatory subunit 7	0.65706	-0.605903	0.532673	0.627073
sp|P61290|PSME3_MOUSE	P61290	PSME3_MOUSE	Psme3	Proteasome activator complex subunit 3	0.656692	-0.606711	0.532312	0.627073
sp|Q14C51|PTCD3_MOUSE	Q14C51	PTCD3_MOUSE	Ptcd3	Pentatricopeptide repeat domain-containing protein 3, mitochondrial	0.655756	-0.60877	0.531389	0.627073
sp|Q9CQM9|GLRX3_MOUSE	Q9CQM9	GLRX3_MOUSE	Glrx3	Glutaredoxin-3	0.655616	-0.609077	0.531251	0.627073
sp|Q9JKC8|AP3M1_MOUSE	Q9JKC8	AP3M1_MOUSE	Ap3m1	AP-3 complex subunit mu-1	0.655517	-0.609295	0.531153	0.627073
sp|Q61646|HPT_MOUSE	Q61646	HPT_MOUSE	Hp	Haptoglobin	0.655107	-0.610198	0.530747	0.627073
sp|Q7TNV0|DEK_MOUSE	Q7TNV0	DEK_MOUSE	Dek	Protein DEK	0.654776	-0.610927	0.530418	0.627073
sp|O55047|TLK2_MOUSE	O55047	TLK2_MOUSE	Tlk2	Serine/threonine-protein kinase tousled-like 2	0.65472	-0.61105	0.530363	0.627073
tr|E9Q6H8|E9Q6H8_MOUSE	E9Q6H8	E9Q6H8_MOUSE	Plekha5	Protein Plekha5	0.654431	-0.611687	0.530076	0.627073
sp|B2RUP2|UN13D_MOUSE	B2RUP2	UN13D_MOUSE	Unc13d	Protein unc-13 homolog D	0.654418	-0.611715	0.530063	0.627073
sp|Q9WVJ2|PSD13_MOUSE	Q9WVJ2	PSD13_MOUSE	Psmd13	26S proteasome non-ATPase regulatory subunit 13	0.654072	-0.612479	0.529718	0.627073
sp|P62821|RAB1A_MOUSE	P62821	RAB1A_MOUSE	Rab1A	Ras-related protein Rab-1A	0.654055	-0.612516	0.529701	0.627073
sp|Q8VE19|MIO_MOUSE	Q8VE19	MIO_MOUSE	Mios	WD repeat-containing protein mio	0.65405	-0.612527	0.529696	0.627073
sp|Q9QYB1|CLIC4_MOUSE	Q9QYB1	CLIC4_MOUSE	Clic4	Chloride intracellular channel protein 4	0.65356	-0.613608	0.529207	0.627073
sp|P05132|KAPCA_MOUSE	P05132	KAPCA_MOUSE	Prkaca	cAMP-dependent protein kinase catalytic subunit alpha	0.653516	-0.613705	0.529163	0.627073
sp|Q3UMC0|SPAT5_MOUSE	Q3UMC0	SPAT5_MOUSE	Spata5	Spermatogenesis-associated protein 5	0.653249	-0.614295	0.528896	0.627073
sp|P62242|RS8_MOUSE	P62242	RS8_MOUSE	Rps8	40S ribosomal protein S8	0.65291	-0.615045	0.528556	0.627073
sp|P28660|NCKP1_MOUSE	P28660	NCKP1_MOUSE	Nckap1	Nck-associated protein 1	0.652805	-0.615275	0.528451	0.627073
sp|Q91VW3|SH3L3_MOUSE	Q91VW3	SH3L3_MOUSE	Sh3bgrl3	SH3 domain-binding glutamic acid-rich-like protein 3	0.652784	-0.615322	0.52843	0.627073
sp|P70362|UFD1_MOUSE	P70362	UFD1_MOUSE	Ufd1l	Ubiquitin fusion degradation protein 1 homolog	0.652183	-0.616651	0.527826	0.627073
sp|Q9Z1E4|GYS1_MOUSE	Q9Z1E4	GYS1_MOUSE	Gys1	Glycogen [starch] synthase, muscle	0.651995	-0.617066	0.527637	0.627073
sp|P53996|CNBP_MOUSE	P53996	CNBP_MOUSE	Cnbp	Cellular nucleic acid-binding protein	0.651899	-0.61728	0.527539	0.627073
tr|B2RXQ2|B2RXQ2_MOUSE	B2RXQ2	B2RXQ2_MOUSE	Ppfia1	Ppfia1 protein	0.651788	-0.617525	0.527428	0.627073
sp|Q9D554|SF3A3_MOUSE	Q9D554	SF3A3_MOUSE	Sf3a3	Splicing factor 3A subunit 3	0.651567	-0.618014	0.527205	0.627073
sp|Q62203|SF3A2_MOUSE	Q62203	SF3A2_MOUSE	Sf3a2	Splicing factor 3A subunit 2	0.650963	-0.619354	0.526593	0.627073
sp|Q9WV32|ARC1B_MOUSE	Q9WV32	ARC1B_MOUSE	Arpc1b	Actin-related protein 2/3 complex subunit 1B	0.650317	-0.620784	0.525939	0.627073
sp|P63024|VAMP3_MOUSE	P63024	VAMP3_MOUSE	Vamp3	Vesicle-associated membrane protein 3	0.649697	-0.622161	0.525307	0.627073
sp|P97823|LYPA1_MOUSE	P97823	LYPA1_MOUSE	Lypla1	Acyl-protein thioesterase 1	0.649488	-0.622626	0.525094	0.627073
sp|Q9QZK2|BCAR3_MOUSE	Q9QZK2	BCAR3_MOUSE	Bcar3	Breast cancer anti-estrogen resistance protein 3	0.649445	-0.622722	0.52505	0.627073
sp|O35685|NUDC_MOUSE	O35685	NUDC_MOUSE	Nudc	Nuclear migration protein nudC	0.648899	-0.623933	0.524493	0.627073
sp|P97822|AN32E_MOUSE	P97822	AN32E_MOUSE	Anp32e	Acidic leucine-rich nuclear phosphoprotein 32 family member E	0.648678	-0.624425	0.524266	0.627073
tr|Q68FG2|Q68FG2_MOUSE	Q68FG2	Q68FG2_MOUSE	Sptbn2	Protein Sptbn2	0.648453	-0.624925	0.524035	0.627073
sp|P54726|RD23A_MOUSE	P54726	RD23A_MOUSE	Rad23a	UV excision repair protein RAD23 homolog A	0.64744	-0.627182	0.522993	0.627073
sp|Q4KWH5|PLCH1_MOUSE	Q4KWH5	PLCH1_MOUSE	Plch1	1-phosphatidylinositol 4,5-bisphosphate phosphodiesterase eta-1	0.647411	-0.627247	0.522963	0.627073
sp|P63330|PP2AA_MOUSE	P63330	PP2AA_MOUSE	Ppp2ca	Serine/threonine-protein phosphatase 2A catalytic subunit alpha isoform	0.647321	-0.627447	0.52287	0.627073
sp|Q9CQU0|TXD12_MOUSE	Q9CQU0	TXD12_MOUSE	Txndc12	Thioredoxin domain-containing protein 12	0.647269	-0.627563	0.522817	0.627073
sp|O54724|PTRF_MOUSE	O54724	PTRF_MOUSE	Ptrf	Polymerase I and transcript release factor	0.646005	-0.630383	0.521508	0.627073
sp|P61358|RL27_MOUSE	P61358	RL27_MOUSE	Rpl27	60S ribosomal protein L27	0.645944	-0.630519	0.521445	0.627073
sp|Q6PDI5|ECM29_MOUSE	Q6PDI5	ECM29_MOUSE	Ecm29	Proteasome-associated protein ECM29 homolog	0.645826	-0.630782	0.521323	0.627073
sp|Q8K0C4|CP51A_MOUSE	Q8K0C4	CP51A_MOUSE	Cyp51a1	Lanosterol 14-alpha demethylase	0.645471	-0.631576	0.520953	0.627073
sp|Q9JHR7|IDE_MOUSE	Q9JHR7	IDE_MOUSE	Ide	Insulin-degrading enzyme	0.645127	-0.632345	0.520594	0.627073
sp|P97434|MPRIP_MOUSE	P97434	MPRIP_MOUSE	Mprip	Myosin phosphatase Rho-interacting protein	0.644295	-0.634207	0.519724	0.627073
sp|Q9R062|GLYG_MOUSE	Q9R062	GLYG_MOUSE	Gyg1	Glycogenin-1	0.644077	-0.634695	0.519497	0.627073
sp|Q8C729|F126B_MOUSE	Q8C729	F126B_MOUSE	Fam126b	Protein FAM126B	0.644046	-0.634764	0.519464	0.627073
sp|Q9WTX5|SKP1_MOUSE	Q9WTX5	SKP1_MOUSE	Skp1	S-phase kinase-associated protein 1	0.643479	-0.636036	0.518868	0.627073
sp|P08030|APT_MOUSE	P08030	APT_MOUSE	Aprt	Adenine phosphoribosyltransferase	0.643228	-0.636599	0.518604	0.627073
sp|P97350|PKP1_MOUSE	P97350	PKP1_MOUSE	Pkp1	Plakophilin-1	0.642912	-0.637307	0.518271	0.627073
sp|Q9QZ88|VPS29_MOUSE	Q9QZ88	VPS29_MOUSE	Vps29	Vacuolar protein sorting-associated protein 29	0.642888	-0.63736	0.518246	0.627073
sp|Q8C1A5|THOP1_MOUSE	Q8C1A5	THOP1_MOUSE	Thop1	Thimet oligopeptidase	0.642884	-0.63737	0.518242	0.627073
sp|Q9CY27|TECR_MOUSE	Q9CY27	TECR_MOUSE	Tecr	Very-long-chain enoyl-CoA reductase	0.642823	-0.637506	0.518178	0.627073
sp|Q8C525|M21D2_MOUSE	Q8C525	M21D2_MOUSE	Mb21d2	Protein MB21D2	0.642049	-0.639244	0.51736	0.627073
sp|Q64727|VINC_MOUSE	Q64727	VINC_MOUSE	Vcl	Vinculin	0.642027	-0.639294	0.517336	0.627073
sp|Q9ET54|PALLD_MOUSE	Q9ET54	PALLD_MOUSE	Palld	Palladin	0.64195	-0.639468	0.517254	0.627073
sp|O35623|BET1_MOUSE	O35623	BET1_MOUSE	Bet1	BET1 homolog	0.641702	-0.640025	0.516992	0.627073
sp|Q8BHN3|GANAB_MOUSE	Q8BHN3	GANAB_MOUSE	Ganab	Neutral alpha-glucosidase AB	0.641089	-0.641404	0.516341	0.627073
sp|Q5XJY5|COPD_MOUSE	Q5XJY5	COPD_MOUSE	Arcn1	Coatomer subunit delta	0.640957	-0.6417	0.516201	0.627073
sp|Q8VI59|PCX3_MOUSE	Q8VI59	PCX3_MOUSE	Pcnxl3	Pecanex-like protein 3	0.640539	-0.642641	0.515755	0.627073
sp|Q3UVK0|ERMP1_MOUSE	Q3UVK0	ERMP1_MOUSE	Ermp1	Endoplasmic reticulum metallopeptidase 1	0.640455	-0.642831	0.515665	0.627073
sp|Q6ZQ93|UBP34_MOUSE	Q6ZQ93	UBP34_MOUSE	Usp34	Ubiquitin carboxyl-terminal hydrolase 34	0.640098	-0.643634	0.515284	0.627073
sp|Q9Z1Z0|USO1_MOUSE	Q9Z1Z0	USO1_MOUSE	Uso1	General vesicular transport factor p115	0.639851	-0.644192	0.51502	0.627073
sp|Q922R8|PDIA6_MOUSE	Q922R8	PDIA6_MOUSE	Pdia6	Protein disulfide-isomerase A6	0.639781	-0.644349	0.514945	0.627073
sp|Q9ES97|RTN3_MOUSE	Q9ES97	RTN3_MOUSE	Rtn3	Reticulon-3	0.639649	-0.644648	0.514803	0.627073
sp|D3YZP9|CCDC6_MOUSE	D3YZP9	CCDC6_MOUSE	Ccdc6	Coiled-coil domain-containing protein 6	0.639556	-0.644856	0.514704	0.627073
sp|Q8BMK4|CKAP4_MOUSE	Q8BMK4	CKAP4_MOUSE	Ckap4	Cytoskeleton-associated protein 4	0.639503	-0.644977	0.514647	0.627073
sp|P10126|EF1A1_MOUSE	P10126	EF1A1_MOUSE	Eef1a1	Elongation factor 1-alpha 1	0.63942	-0.645164	0.514558	0.627073
sp|P25425|PO2F1_MOUSE	P25425	PO2F1_MOUSE	Pou2f1	POU domain, class 2, transcription factor 1	0.639094	-0.645899	0.514209	0.627073
sp|Q9CPV4|GLOD4_MOUSE	Q9CPV4	GLOD4_MOUSE	Glod4	Glyoxalase domain-containing protein 4	0.638818	-0.646523	0.513912	0.627073
sp|Q9DCC8|TOM20_MOUSE	Q9DCC8	TOM20_MOUSE	Tomm20	Mitochondrial import receptor subunit TOM20 homolog	0.638686	-0.646822	0.513769	0.627073
sp|Q9D8U8|SNX5_MOUSE	Q9D8U8	SNX5_MOUSE	Snx5	Sorting nexin-5	0.638501	-0.647238	0.513571	0.627073
sp|P17751|TPIS_MOUSE	P17751	TPIS_MOUSE	Tpi1	Triosephosphate isomerase	0.638321	-0.647645	0.513377	0.627073
sp|Q9Z139|ROR1_MOUSE	Q9Z139	ROR1_MOUSE	Ror1	Tyrosine-protein kinase transmembrane receptor ROR1	0.637793	-0.64884	0.512807	0.627073
sp|Q61599|GDIR2_MOUSE	Q61599	GDIR2_MOUSE	Arhgdib	Rho GDP-dissociation inhibitor 2	0.637761	-0.648913	0.512772	0.627073
sp|A2ATU0|DHTK1_MOUSE	A2ATU0	DHTK1_MOUSE	Dhtkd1	Probable 2-oxoglutarate dehydrogenase E1 component DHKTD1, mitochondrial	0.637191	-0.650203	0.512155	0.627073
sp|Q9DB25|ALG5_MOUSE	Q9DB25	ALG5_MOUSE	Alg5	Dolichyl-phosphate beta-glucosyltransferase	0.636896	-0.650869	0.511836	0.627073
sp|P16254|SRP14_MOUSE	P16254	SRP14_MOUSE	Srp14	Signal recognition particle 14 kDa protein	0.636625	-0.651483	0.511542	0.627073
sp|Q99JY9|ARP3_MOUSE	Q99JY9	ARP3_MOUSE	Actr3	Actin-related protein 3	0.636171	-0.652514	0.511047	0.627073
sp|P62259|1433E_MOUSE	P62259	1433E_MOUSE	Ywhae	14-3-3 protein epsilon	0.63596	-0.652993	0.510817	0.627073
sp|Q9CQD1|RAB5A_MOUSE	Q9CQD1	RAB5A_MOUSE	Rab5a	Ras-related protein Rab-5A	0.635553	-0.653916	0.510374	0.627073
sp|P18760|COF1_MOUSE	P18760	COF1_MOUSE	Cfl1	Cofilin-1	0.635127	-0.654883	0.509908	0.627073
tr|Q8CD76|Q8CD76_MOUSE	Q8CD76	Q8CD76_MOUSE	Klc1	Kinesin light chain 1	0.633955	-0.657547	0.508623	0.627073
sp|Q8R1Q8|DC1L1_MOUSE	Q8R1Q8	DC1L1_MOUSE	Dync1li1	Cytoplasmic dynein 1 light intermediate chain 1	0.633458	-0.65868	0.508075	0.627073
sp|Q8R361|RFIP5_MOUSE	Q8R361	RFIP5_MOUSE	Rab11fip5	Rab11 family-interacting protein 5	0.632822	-0.660129	0.507373	0.627073
sp|Q7TN73|CASD1_MOUSE	Q7TN73	CASD1_MOUSE	Casd1	CAS1 domain-containing protein 1	0.63267	-0.660474	0.507205	0.627073
sp|Q8BH95|ECHM_MOUSE	Q8BH95	ECHM_MOUSE	Echs1	Enoyl-CoA hydratase, mitochondrial	0.632469	-0.660932	0.506983	0.627073
sp|Q91YT0|NDUV1_MOUSE	Q91YT0	NDUV1_MOUSE	Ndufv1	NADH dehydrogenase [ubiquinone] flavoprotein 1, mitochondrial	0.632265	-0.661398	0.506757	0.627073
sp|O88574|SAP30_MOUSE	O88574	SAP30_MOUSE	Sap30	Histone deacetylase complex subunit SAP30	0.632264	-0.6614	0.506756	0.627073
tr|E9Q6R7|E9Q6R7_MOUSE	E9Q6R7	E9Q6R7_MOUSE	Utrn	Protein Utrn	0.632176	-0.661602	0.506658	0.627073
sp|P20029|GRP78_MOUSE	P20029	GRP78_MOUSE	Hspa5	78 kDa glucose-regulated protein	0.631762	-0.662547	0.506198	0.627073
sp|Q6JPI3|MD13L_MOUSE	Q6JPI3	MD13L_MOUSE	Med13l	Mediator of RNA polymerase II transcription subunit 13-like	0.630698	-0.664978	0.505014	0.627073
sp|Q8R4R6|NUP53_MOUSE	Q8R4R6	NUP53_MOUSE	Nup35	Nucleoporin NUP53	0.629939	-0.666715	0.504165	0.627073
sp|Q3UHX2|HAP28_MOUSE	Q3UHX2	HAP28_MOUSE	Pdap1	28 kDa heat- and acid-stable phosphoprotein	0.62942	-0.667904	0.503583	0.627073
sp|P97372|PSME2_MOUSE	P97372	PSME2_MOUSE	Psme2	Proteasome activator complex subunit 2	0.629327	-0.668119	0.503478	0.627073
sp|P60867|RS20_MOUSE	P60867	RS20_MOUSE	Rps20	40S ribosomal protein S20	0.629228	-0.668346	0.503367	0.627073
sp|Q3B7Z2|OSBP1_MOUSE	Q3B7Z2	OSBP1_MOUSE	Osbp	Oxysterol-binding protein 1	0.628801	-0.669324	0.502887	0.627073
sp|Q91Z53|GRHPR_MOUSE	Q91Z53	GRHPR_MOUSE	Grhpr	Glyoxylate reductase/hydroxypyruvate reductase	0.62877	-0.669396	0.502852	0.627073
sp|O55131|SEPT7_MOUSE	O55131	SEPT7_MOUSE	42254	Septin-7	0.628625	-0.669729	0.502688	0.627073
sp|Q9CQA1|TPPC5_MOUSE	Q9CQA1	TPPC5_MOUSE	Trappc5	Trafficking protein particle complex subunit 5	0.628361	-0.670334	0.502391	0.627073
sp|P70335|ROCK1_MOUSE	P70335	ROCK1_MOUSE	Rock1	Rho-associated protein kinase 1	0.628283	-0.670513	0.502303	0.627073
sp|Q9QYC0|ADDA_MOUSE	Q9QYC0	ADDA_MOUSE	Add1	Alpha-adducin	0.628216	-0.670668	0.502227	0.627073
sp|P26883|FKB1A_MOUSE	P26883	FKB1A_MOUSE	Fkbp1a	Peptidyl-prolyl cis-trans isomerase FKBP1A	0.627817	-0.671584	0.501776	0.627073
sp|Q8CIN4|PAK2_MOUSE	Q8CIN4	PAK2_MOUSE	Pak2	Serine/threonine-protein kinase PAK 2	0.6276	-0.672083	0.501531	0.627073
sp|Q62261|SPTB2_MOUSE	Q62261	SPTB2_MOUSE	Sptbn1	Spectrin beta chain, non-erythrocytic 1	0.62744	-0.672451	0.50135	0.627073
sp|P45376|ALDR_MOUSE	P45376	ALDR_MOUSE	Akr1b1	Aldose reductase	0.62737	-0.672611	0.501271	0.627073
sp|P06745|G6PI_MOUSE	P06745	G6PI_MOUSE	Gpi	Glucose-6-phosphate isomerase	0.626869	-0.673764	0.500702	0.627073
sp|O35350|CAN1_MOUSE	O35350	CAN1_MOUSE	Capn1	Calpain-1 catalytic subunit	0.626836	-0.673839	0.500665	0.627073
sp|P05063|ALDOC_MOUSE	P05063	ALDOC_MOUSE	Aldoc	Fructose-bisphosphate aldolase C	0.626456	-0.674714	0.500233	0.627073
sp|Q8BKZ9|ODPX_MOUSE	Q8BKZ9	ODPX_MOUSE	Pdhx	Pyruvate dehydrogenase protein X component, mitochondrial	0.626174	-0.675365	0.499912	0.627073
sp|Q62465|VAT1_MOUSE	Q62465	VAT1_MOUSE	Vat1	Synaptic vesicle membrane protein VAT-1 homolog	0.625979	-0.675815	0.499689	0.627073
sp|P60904|DNJC5_MOUSE	P60904	DNJC5_MOUSE	Dnajc5	DnaJ homolog subfamily C member 5	0.625972	-0.675831	0.499682	0.627073
sp|O35864|CSN5_MOUSE	O35864	CSN5_MOUSE	Cops5	COP9 signalosome complex subunit 5	0.625738	-0.67637	0.499415	0.627073
sp|Q8BJU0|SGTA_MOUSE	Q8BJU0	SGTA_MOUSE	Sgta	Small glutamine-rich tetratricopeptide repeat-containing protein alpha	0.62563	-0.676619	0.499292	0.627073
sp|Q3UX43|AN13C_MOUSE	Q3UX43	AN13C_MOUSE	Ankrd13c	Ankyrin repeat domain-containing protein 13C	0.625451	-0.67703	0.499088	0.627073
sp|Q99JW4|LIMS1_MOUSE	Q99JW4	LIMS1_MOUSE	Lims1	LIM and senescent cell antigen-like-containing domain protein 1	0.624677	-0.678819	0.498201	0.627073
sp|Q9R0Q7|TEBP_MOUSE	Q9R0Q7	TEBP_MOUSE	Ptges3	Prostaglandin E synthase 3	0.624508	-0.679208	0.498008	0.627073
sp|Q2NL51|GSK3A_MOUSE	Q2NL51	GSK3A_MOUSE	Gsk3a	Glycogen synthase kinase-3 alpha	0.62448	-0.679273	0.497976	0.627073
sp|Q8C4Q6|AIDA_MOUSE	Q8C4Q6	AIDA_MOUSE	Aida	Axin interactor, dorsalization-associated protein	0.623645	-0.681203	0.497016	0.627073
sp|Q791T5|MTCH1_MOUSE	Q791T5	MTCH1_MOUSE	Mtch1	Mitochondrial carrier homolog 1	0.623597	-0.681315	0.496961	0.627073
sp|Q6ZPJ0|TEX2_MOUSE	Q6ZPJ0	TEX2_MOUSE	Tex2	Testis-expressed sequence 2 protein	0.623367	-0.681845	0.496697	0.627073
sp|O88544|CSN4_MOUSE	O88544	CSN4_MOUSE	Cops4	COP9 signalosome complex subunit 4	0.623209	-0.682212	0.496514	0.627073
sp|P05214|TBA3_MOUSE	P05214	TBA3_MOUSE	Tuba3a	Tubulin alpha-3 chain	0.623142	-0.682366	0.496437	0.627073
sp|Q2TPA8|HSDL2_MOUSE	Q2TPA8	HSDL2_MOUSE	Hsdl2	Hydroxysteroid dehydrogenase-like protein 2	0.622819	-0.683116	0.496063	0.627073
sp|Q8VCM7|FIBG_MOUSE	Q8VCM7	FIBG_MOUSE	Fgg	Fibrinogen gamma chain	0.622666	-0.683469	0.495887	0.627073
sp|Q68FH0|PKP4_MOUSE	Q68FH0	PKP4_MOUSE	Pkp4	Plakophilin-4	0.622096	-0.684791	0.495227	0.627073
sp|O35381|AN32A_MOUSE	O35381	AN32A_MOUSE	Anp32a	Acidic leucine-rich nuclear phosphoprotein 32 family member A	0.62209	-0.684806	0.49522	0.627073
sp|Q9QXB9|DRG2_MOUSE	Q9QXB9	DRG2_MOUSE	Drg2	Developmentally-regulated GTP-binding protein 2	0.621467	-0.68625	0.494497	0.627073
sp|Q8QZY9|SF3B4_MOUSE	Q8QZY9	SF3B4_MOUSE	Sf3b4	Splicing factor 3B subunit 4	0.62139	-0.68643	0.494407	0.627073
sp|P99026|PSB4_MOUSE	P99026	PSB4_MOUSE	Psmb4	Proteasome subunit beta type-4	0.621287	-0.686667	0.494288	0.627073
sp|P53994|RAB2A_MOUSE	P53994	RAB2A_MOUSE	Rab2a	Ras-related protein Rab-2A	0.621204	-0.68686	0.494192	0.627073
sp|Q8CG76|ARK72_MOUSE	Q8CG76	ARK72_MOUSE	Akr7a2	Aflatoxin B1 aldehyde reductase member 2	0.621038	-0.687247	0.493998	0.627073
sp|O54734|OST48_MOUSE	O54734	OST48_MOUSE	Ddost	Dolichyl-diphosphooligosaccharide--protein glycosyltransferase 48 kDa subunit	0.621033	-0.687257	0.493993	0.627073
sp|P97351|RS3A_MOUSE	P97351	RS3A_MOUSE	Rps3a	40S ribosomal protein S3a	0.620793	-0.687816	0.493713	0.627073
sp|P09450|JUNB_MOUSE	P09450	JUNB_MOUSE	Junb	Transcription factor jun-B	0.620531	-0.688425	0.493407	0.627073
sp|Q75UR0|ANO5_MOUSE	Q75UR0	ANO5_MOUSE	Ano5	Anoctamin-5	0.620183	-0.689234	0.493001	0.627073
sp|Q99KV1|DJB11_MOUSE	Q99KV1	DJB11_MOUSE	Dnajb11	DnaJ homolog subfamily B member 11	0.61999	-0.689683	0.492776	0.627073
sp|Q9D7S9|CHMP5_MOUSE	Q9D7S9	CHMP5_MOUSE	Chmp5	Charged multivesicular body protein 5	0.619498	-0.690829	0.4922	0.627073
sp|P08113|ENPL_MOUSE	P08113	ENPL_MOUSE	Hsp90b1	Endoplasmin	0.619406	-0.691042	0.492093	0.627073
tr|E9Q309|E9Q309_MOUSE	E9Q309	E9Q309_MOUSE	Cep350	Protein Cep350	0.619028	-0.691924	0.491648	0.627073
tr|Q3U3J1|Q3U3J1_MOUSE	Q3U3J1	Q3U3J1_MOUSE	Bckdha	2-oxoisovalerate dehydrogenase subunit alpha, mitochondrial	0.61848	-0.693201	0.491005	0.627073
sp|Q921Y0|MOB1A_MOUSE	Q921Y0	MOB1A_MOUSE	Mob1a	MOB kinase activator 1A	0.618149	-0.693973	0.490615	0.627073
sp|Q8BJQ2|UBP1_MOUSE	Q8BJQ2	UBP1_MOUSE	Usp1	Ubiquitin carboxyl-terminal hydrolase 1	0.617793	-0.694805	0.490195	0.627073
sp|P35831|PTN12_MOUSE	P35831	PTN12_MOUSE	Ptpn12	Tyrosine-protein phosphatase non-receptor type 12	0.617542	-0.695392	0.489899	0.627073
sp|Q8CCJ3|UFL1_MOUSE	Q8CCJ3	UFL1_MOUSE	Ufl1	E3 UFM1-protein ligase 1	0.617465	-0.69557	0.489808	0.627073
sp|P30999|CTND1_MOUSE	P30999	CTND1_MOUSE	Ctnnd1	Catenin delta-1	0.617348	-0.695843	0.48967	0.627073
sp|Q91WM2|CECR5_MOUSE	Q91WM2	CECR5_MOUSE	Cecr5	Cat eye syndrome critical region protein 5 homolog	0.616578	-0.697645	0.488758	0.627073
sp|Q99JT2|MST4_MOUSE	Q99JT2	MST4_MOUSE	Mst4	Serine/threonine-protein kinase MST4	0.616557	-0.697694	0.488733	0.627073
sp|P47856|GFPT1_MOUSE	P47856	GFPT1_MOUSE	Gfpt1	Glutamine--fructose-6-phosphate aminotransferase [isomerizing] 1	0.616252	-0.698408	0.488371	0.627073
sp|Q99KI0|ACON_MOUSE	Q99KI0	ACON_MOUSE	Aco2	Aconitate hydratase, mitochondrial	0.61613	-0.698694	0.488226	0.627073
sp|P35564|CALX_MOUSE	P35564	CALX_MOUSE	Canx	Calnexin	0.615876	-0.699288	0.487925	0.627073
sp|Q9CQB5|CISD2_MOUSE	Q9CQB5	CISD2_MOUSE	Cisd2	CDGSH iron-sulfur domain-containing protein 2	0.615689	-0.699727	0.487702	0.627073
sp|P49138|MAPK2_MOUSE	P49138	MAPK2_MOUSE	Mapkapk2	MAP kinase-activated protein kinase 2	0.615686	-0.699733	0.487699	0.627073
sp|Q9Z1Q5|CLIC1_MOUSE	Q9Z1Q5	CLIC1_MOUSE	Clic1	Chloride intracellular channel protein 1	0.615583	-0.699974	0.487576	0.627073
sp|Q8C0E3|TRI47_MOUSE	Q8C0E3	TRI47_MOUSE	Trim47	Tripartite motif-containing protein 47	0.615473	-0.700234	0.487445	0.627073
sp|P54227|STMN1_MOUSE	P54227	STMN1_MOUSE	Stmn1	Stathmin	0.61543	-0.700334	0.487394	0.627073
sp|Q7TT50|MRCKB_MOUSE	Q7TT50	MRCKB_MOUSE	Cdc42bpb	Serine/threonine-protein kinase MRCK beta	0.615343	-0.700536	0.487291	0.627073
sp|Q9QY36|NAA10_MOUSE	Q9QY36	NAA10_MOUSE	Naa10	N-alpha-acetyltransferase 10	0.614769	-0.701884	0.486605	0.627073
sp|Q8K1Y2|KPCD3_MOUSE	Q8K1Y2	KPCD3_MOUSE	Prkd3	Serine/threonine-protein kinase D3	0.614031	-0.703617	0.485723	0.627073
sp|P97429|ANXA4_MOUSE	P97429	ANXA4_MOUSE	Anxa4	Annexin A4	0.613082	-0.705848	0.484584	0.627073
sp|O88271|CFDP1_MOUSE	O88271	CFDP1_MOUSE	Cfdp1	Craniofacial development protein 1	0.612468	-0.707294	0.483844	0.627073
sp|Q9Z0G0|GIPC1_MOUSE	Q9Z0G0	GIPC1_MOUSE	Gipc1	PDZ domain-containing protein GIPC1	0.612269	-0.707763	0.483604	0.627073
sp|Q99N57|RAF1_MOUSE	Q99N57	RAF1_MOUSE	Raf1	RAF proto-oncogene serine/threonine-protein kinase	0.611893	-0.708648	0.483151	0.627073
sp|Q920E5|FPPS_MOUSE	Q920E5	FPPS_MOUSE	Fdps	Farnesyl pyrophosphate synthase	0.611783	-0.708908	0.483018	0.627073
sp|A2AWA9|RBGP1_MOUSE	A2AWA9	RBGP1_MOUSE	Rabgap1	Rab GTPase-activating protein 1	0.611771	-0.708937	0.483003	0.627073
sp|Q8BMP6|GCP60_MOUSE	Q8BMP6	GCP60_MOUSE	Acbd3	Golgi resident protein GCP60	0.611706	-0.709091	0.482924	0.627073
sp|P22892|AP1G1_MOUSE	P22892	AP1G1_MOUSE	Ap1g1	AP-1 complex subunit gamma-1	0.611461	-0.709669	0.482628	0.627073
sp|P62482|KCAB2_MOUSE	P62482	KCAB2_MOUSE	Kcnab2	Voltage-gated potassium channel subunit beta-2	0.611418	-0.709769	0.482576	0.627073
sp|Q6ZQI3|MLEC_MOUSE	Q6ZQI3	MLEC_MOUSE	Mlec	Malectin	0.611346	-0.70994	0.482489	0.627073
sp|P63038|CH60_MOUSE	P63038	CH60_MOUSE	Hspd1	60 kDa heat shock protein, mitochondrial	0.611318	-0.710004	0.482456	0.627073
sp|Q9JK48|SHLB1_MOUSE	Q9JK48	SHLB1_MOUSE	Sh3glb1	Endophilin-B1	0.611281	-0.710093	0.48241	0.627073
sp|Q67FY2|BCL9L_MOUSE	Q67FY2	BCL9L_MOUSE	Bcl9l	B-cell CLL/lymphoma 9-like protein	0.6105	-0.711937	0.481463	0.627073
sp|P42128|FOXK1_MOUSE	P42128	FOXK1_MOUSE	Foxk1	Forkhead box protein K1	0.609913	-0.713324	0.48075	0.627073
sp|P63017|HSP7C_MOUSE	P63017	HSP7C_MOUSE	Hspa8	Heat shock cognate 71 kDa protein	0.608435	-0.716824	0.478945	0.627073
sp|Q4QQM4|P5I11_MOUSE	Q4QQM4	P5I11_MOUSE	Trp53i11	Tumor protein p53-inducible protein 11	0.608057	-0.717723	0.478481	0.627073
sp|O08749|DLDH_MOUSE	O08749	DLDH_MOUSE	Dld	Dihydrolipoyl dehydrogenase, mitochondrial	0.607363	-0.719369	0.47763	0.627073
[truncated: 379 more rows]
