# Supplementary material for: iDRiP for the systematic discovery of proteins bound directly to noncoding RNA
Source: Springer Nature journal article supplement (doi:10.1038/s41596-021-00555-9), 2021-06-09
Supplement: MOESM7 [file 41596_2021_555_MOESM7_ESM20.xlsx]

## Sheet: U1-ChIRP statistics by fitting 
Reference	Entry	Uniprot_Gene_name	GeneName	Protein_description	Abundance Ratio	log2(Abundance Ratio)	p value	FDR
sp|Q8VHN8|SDOS_MOUSE	Q8VHN8	SDOS_MOUSE	Nudt16l1	Protein syndesmos	120.49	6.91277	8.61089e-119	2.47735e-115
sp|Q80VD1|FA98B_MOUSE	Q80VD1	FA98B_MOUSE	Fam98b	Protein FAM98B	87.3093	6.44806	9.64301e-104	1.38715e-100
sp|P20263|PO5F1_MOUSE	P20263	PO5F1_MOUSE	Pou5f1	POU domain, class 5, transcription factor 1	78.1439	6.28806	8.48255e-99	8.13477e-96
sp|P97801|SMN_MOUSE	P97801	SMN_MOUSE	Smn1	Survival motor neuron protein	75.7341	6.24287	2.00886e-97	1.44487e-94
sp|O09000|NCOA3_MOUSE	O09000	NCOA3_MOUSE	Ncoa3	Nuclear receptor coactivator 3	64.1367	6.00308	2.71581e-90	1.56268e-87
sp|Q9CQE8|CN166_MOUSE	Q9CQE8	CN166_MOUSE	>sp|Q9CQE8|CN166_MOUSE	n/a	61.7356	5.94803	1.07744e-88	5.16635e-86
sp|D3YXK2|SAFB1_MOUSE	D3YXK2	SAFB1_MOUSE	Safb	Scaffold attachment factor B1	59.8848	5.90412	1.98233e-87	8.14736e-85
sp|Q3USH5|SFSWA_MOUSE	Q3USH5	SFSWA_MOUSE	Sfswap	Splicing factor, suppressor of white-apricot homolog	54.8701	5.77795	7.59108e-84	2.72994e-81
sp|Q9CX86|ROA0_MOUSE	Q9CX86	ROA0_MOUSE	Hnrnpa0	Heterogeneous nuclear ribonucleoprotein A0	48.0447	5.58631	1.50746e-78	4.81884e-76
sp|Q8K368|FANCI_MOUSE	Q8K368	FANCI_MOUSE	Fanci	Fanconi anemia group I protein homolog	46.3983	5.536	3.46785e-77	9.97701e-75
sp|Q5SU73|COIL_MOUSE	Q5SU73	COIL_MOUSE	Coil	Coilin	38.2402	5.25702	7.48385e-70	1.95737e-67
tr|Q8BGJ5|Q8BGJ5_MOUSE	Q8BGJ5	Q8BGJ5_MOUSE	Ptbp1	MCG13402, isoform CRA_a	34.976	5.12829	1.36002e-66	3.26064e-64
tr|D3YWX2|D3YWX2_MOUSE	D3YWX2	D3YWX2_MOUSE	Ylpm1	YLP motif-containing protein 1	30.1225	4.91277	2.59825e-61	5.75014e-59
tr|Q6P6L6|Q6P6L6_MOUSE	Q6P6L6	Q6P6L6_MOUSE	Gemin4	Gem (Nuclear organelle) associated protein 4	28.8265	4.84932	8.45911e-60	1.73835e-57
sp|Q61539|ERR2_MOUSE	Q61539	ERR2_MOUSE	Esrrb	Steroid hormone receptor ERR2	28.5219	4.834	1.94911e-59	3.73838e-57
sp|Q8BHR2|ENOX1_MOUSE	Q8BHR2	ENOX1_MOUSE	Enox1	Ecto-NOX disulfide-thiol exchanger 1	25.7885	4.68866	4.70311e-56	8.45677e-54
sp|Q64012|RALY_MOUSE	Q64012	RALY_MOUSE	Raly	RNA-binding protein Raly	24.9183	4.63913	6.33832e-55	1.07267e-52
sp|Q9CX48|ZCH10_MOUSE	Q9CX48	ZCH10_MOUSE	Zcchc10	Zinc finger CCHC domain-containing protein 10	22.9924	4.52309	2.53206e-52	4.04708e-50
sp|Q9CWT2|BEX4_MOUSE	Q9CWT2	BEX4_MOUSE	Bex4	Protein BEX4	21.6767	4.43807	1.85657e-50	2.81125e-48
sp|P52624|UPP1_MOUSE	P52624	UPP1_MOUSE	Upp1	Uridine phosphorylase 1	21.4646	4.42389	3.77202e-50	5.42605e-48
sp|Q6PIP5|NUDC1_MOUSE	Q6PIP5	NUDC1_MOUSE	Nudcd1	NudC domain-containing protein 1	20.9768	4.39073	1.96149e-49	2.68724e-47
tr|Q9DAE2|Q9DAE2_MOUSE	Q9DAE2	Q9DAE2_MOUSE	Rbmxl2	Protein Rbmxl2	20.5721	4.36261	7.86121e-49	1.02803e-46
tr|B2RQG2|B2RQG2_MOUSE	B2RQG2	B2RQG2_MOUSE	Phf3	PHD finger protein 3	20.1876	4.3354	2.98933e-48	3.73926e-46
sp|Q3UL36|ARGL1_MOUSE	Q3UL36	ARGL1_MOUSE	Arglu1	Arginine and glutamate-rich protein 1	20.0319	4.32422	5.16147e-48	6.18732e-46
sp|Q9JIY2|HAKAI_MOUSE	Q9JIY2	HAKAI_MOUSE	Cbll1	E3 ubiquitin-protein ligase Hakai	19.8221	4.30904	1.08188e-47	1.24503e-45
sp|Q9CWY4|GEMI7_MOUSE	Q9CWY4	GEMI7_MOUSE	Gemin7	Gem-associated protein 7	18.7307	4.22734	5.54999e-46	6.14128e-44
sp|Q9WVB0|RBPMS_MOUSE	Q9WVB0	RBPMS_MOUSE	Rbpms	RNA-binding protein with multiple splicing	18.1732	4.18374	4.40319e-45	4.69184e-43
sp|O55236|MCE1_MOUSE	O55236	MCE1_MOUSE	Rngtt	mRNA-capping enzyme	18.1369	4.18086	5.04732e-45	5.18612e-43
sp|Q5XG69|F169A_MOUSE	Q5XG69	F169A_MOUSE	Fam169a	Soluble lamin-associated protein of 75 kDa	17.6256	4.1396	3.51137e-44	3.48352e-42
sp|Q3TX08|TRM1_MOUSE	Q3TX08	TRM1_MOUSE	Trmt1	tRNA (guanine(26)-N(2))-dimethyltransferase	17.4839	4.12796	6.05007e-44	5.80202e-42
sp|Q61464|ZN638_MOUSE	Q61464	ZN638_MOUSE	Znf638	Zinc finger protein 638	17.3651	4.11812	9.56909e-44	8.88074e-42
tr|Q3TIX6|Q3TIX6_MOUSE	Q3TIX6	Q3TIX6_MOUSE	Fubp3	Protein Fubp3	17.2857	4.11151	1.30151e-43	1.17014e-41
sp|Q3UQA7|SELH_MOUSE	Q3UQA7	SELH_MOUSE	Selh	Selenoprotein H	16.9465	4.08292	4.89365e-43	4.26638e-41
sp|O08784|TCOF_MOUSE	O08784	TCOF_MOUSE	Tcof1	Treacle protein	16.7246	4.0639	1.17552e-42	9.94696e-41
sp|P32067|LA_MOUSE	P32067	LA_MOUSE	Ssb	Lupus La protein homolog	16.7087	4.06253	1.25178e-42	1.02896e-40
sp|Q80ZV0|RNH2B_MOUSE	Q80ZV0	RNH2B_MOUSE	Rnaseh2b	Ribonuclease H2 subunit B	16.3675	4.03276	4.89084e-42	3.90859e-40
sp|O88700|BLM_MOUSE	O88700	BLM_MOUSE	Blm	Bloom syndrome protein homolog	16.0947	4.00851	1.47406e-41	1.14618e-39
sp|P00375|DYR_MOUSE	P00375	DYR_MOUSE	Dhfr	Dihydrofolate reductase	15.988	3.99892	2.27653e-41	1.72357e-39
sp|P24472|GSTA4_MOUSE	P24472	GSTA4_MOUSE	Gsta4	Glutathione S-transferase A4	15.6152	3.96488	1.05572e-40	7.78798e-39
sp|Q922U1|PRPF3_MOUSE	Q922U1	PRPF3_MOUSE	Prpf3	U4/U6 small nuclear ribonucleoprotein Prp3	15.3933	3.94423	2.66001e-40	1.91321e-38
sp|Q5U4C3|SFR19_MOUSE	Q5U4C3	SFR19_MOUSE	Scaf1	Splicing factor, arginine/serine-rich 19	15.0025	3.90713	1.38399e-39	9.71153e-38
sp|O88874|CCNK_MOUSE	O88874	CCNK_MOUSE	Ccnk	Cyclin-K	14.9622	3.90325	1.64353e-39	1.12582e-37
sp|Q9D2E2|TOE1_MOUSE	Q9D2E2	TOE1_MOUSE	Toe1	Target of EGR1 protein 1	14.7547	3.88311	3.9948e-39	2.6728e-37
sp|Q8C854|MYEF2_MOUSE	Q8C854	MYEF2_MOUSE	Myef2	Myelin expression factor 2	14.5503	3.86298	9.66178e-39	6.31748e-37
sp|Q9CX53|GEMI6_MOUSE	Q9CX53	GEMI6_MOUSE	Gemin6	Gem-associated protein 6	14.523	3.86027	1.08783e-38	6.95487e-37
tr|E9QNN1|E9QNN1_MOUSE	E9QNN1	E9QNN1_MOUSE	Dhx9	ATP-dependent RNA helicase A	14.3456	3.84254	2.3582e-38	1.4749e-36
sp|Q6NXI6|RPRD2_MOUSE	Q6NXI6	RPRD2_MOUSE	Rprd2	Regulation of nuclear pre-mRNA domain-containing protein 2	14.1371	3.82142	5.90137e-38	3.61239e-36
sp|Q62376|RU17_MOUSE	Q62376	RU17_MOUSE	Snrnp70	U1 small nuclear ribonucleoprotein 70 kDa	13.2132	3.72391	3.82405e-36	2.29204e-34
sp|O88574|SAP30_MOUSE	O88574	SAP30_MOUSE	Sap30	Histone deacetylase complex subunit SAP30	13.1995	3.72241	4.07412e-36	2.39209e-34
sp|P30681|HMGB2_MOUSE	P30681	HMGB2_MOUSE	Hmgb2	High mobility group protein B2	12.1777	3.60617	5.1258e-34	2.94939e-32
tr|E9PZP8|E9PZP8_MOUSE	E9PZP8	E9PZP8_MOUSE	Herc1	Protein Herc1	11.9724	3.58164	1.39563e-33	7.87301e-32
sp|Q921F2|TADBP_MOUSE	Q921F2	TADBP_MOUSE	Tardbp	TAR DNA-binding protein 43	11.968	3.58112	1.42568e-33	7.88786e-32
sp|Q9D883|U2AF1_MOUSE	Q9D883	U2AF1_MOUSE	U2af1	Splicing factor U2AF 35 kDa subunit	11.8844	3.571	2.15051e-33	1.16736e-31
sp|Q9CQ60|6PGL_MOUSE	Q9CQ60	6PGL_MOUSE	Pgls	6-phosphogluconolactonase	11.5888	3.53466	9.32555e-33	4.96845e-31
sp|Q9QWT9|KIFC1_MOUSE	Q9QWT9	KIFC1_MOUSE	Kifc1	Kinesin-like protein KIFC1	11.3938	3.51017	2.48639e-32	1.30061e-30
sp|Q9JJT9|PHAX_MOUSE	Q9JJT9	PHAX_MOUSE	Phax	Phosphorylated adapter RNA export protein	11.3891	3.50958	2.54644e-32	1.30823e-30
sp|Q9CRC8|LRC40_MOUSE	Q9CRC8	LRC40_MOUSE	Lrrc40	Leucine-rich repeat-containing protein 40	11.014	3.46126	1.72858e-31	8.7248e-30
sp|P97770|THUM3_MOUSE	P97770	THUM3_MOUSE	Thumpd3	THUMP domain-containing protein 3	10.9212	3.44907	2.79182e-31	1.38484e-29
sp|Q8R0F5|RBMX2_MOUSE	Q8R0F5	RBMX2_MOUSE	Rbmx2	RNA-binding motif protein, X-linked 2	10.8127	3.43466	4.90762e-31	2.39309e-29
tr|E9Q5C9|E9Q5C9_MOUSE	E9Q5C9	E9Q5C9_MOUSE	Nolc1	Protein Nolc1	10.1521	3.34371	1.6411e-29	7.86906e-28
sp|Q9R0P3|ESTD_MOUSE	Q9R0P3	ESTD_MOUSE	Esd	S-formylglutathione hydrolase	10.0288	3.32608	3.20593e-29	1.51204e-27
sp|P56959|FUS_MOUSE	P56959	FUS_MOUSE	Fus	RNA-binding protein FUS	9.98447	3.31969	4.08414e-29	1.89517e-27
sp|Q9CRB6|TPPP3_MOUSE	Q9CRB6	TPPP3_MOUSE	Tppp3	Tubulin polymerization-promoting protein family member 3	9.94069	3.31335	5.1899e-29	2.37005e-27
sp|P34884|MIF_MOUSE	P34884	MIF_MOUSE	Mif	Macrophage migration inhibitory factor	9.92088	3.31047	5.78532e-29	2.60068e-27
sp|Q9CX34|SUGT1_MOUSE	Q9CX34	SUGT1_MOUSE	Sugt1	Suppressor of G2 allele of SKP1 homolog	9.86904	3.30291	7.69177e-29	3.4045e-27
sp|P16460|ASSY_MOUSE	P16460	ASSY_MOUSE	Ass1	Argininosuccinate synthase	9.5888	3.26135	3.64226e-28	1.58769e-26
sp|P70372|ELAV1_MOUSE	P70372	ELAV1_MOUSE	Elavl1	ELAV-like protein 1	9.54078	3.25411	4.76693e-28	2.04694e-26
sp|P37804|TAGL_MOUSE	P37804	TAGL_MOUSE	Tagln	Transgelin	9.37206	3.22837	1.23457e-27	5.22331e-26
sp|P14602|HSPB1_MOUSE	P14602	HSPB1_MOUSE	Hspb1	Heat shock protein beta-1	9.30194	3.21753	1.83878e-27	7.63991e-26
sp|Q3V300|KIF22_MOUSE	Q3V300	KIF22_MOUSE	Kif22	Kinesin-like protein KIF22	9.30004	3.21724	1.85886e-27	7.63991e-26
sp|Q9DBR0|AKAP8_MOUSE	Q9DBR0	AKAP8_MOUSE	Akap8	A-kinase anchor protein 8	9.15669	3.19483	4.22001e-27	1.71e-25
sp|Q99MV1|TDRD1_MOUSE	Q99MV1	TDRD1_MOUSE	Tdrd1	Tudor domain-containing protein 1	9.12034	3.18909	5.2012e-27	2.07831e-25
sp|Q91WJ8|FUBP1_MOUSE	Q91WJ8	FUBP1_MOUSE	Fubp1	Far upstream element-binding protein 1	8.97302	3.16559	1.21954e-26	4.80632e-25
sp|Q9R1C7|PR40A_MOUSE	Q9R1C7	PR40A_MOUSE	Prpf40a	Pre-mRNA-processing factor 40 homolog A	8.96546	3.16438	1.27432e-26	4.95436e-25
sp|Q8CAY6|THIC_MOUSE	Q8CAY6	THIC_MOUSE	Acat2	Acetyl-CoA acetyltransferase, cytosolic	8.89703	3.15332	1.89861e-26	7.28307e-25
sp|Q9JJY4|DDX20_MOUSE	Q9JJY4	DDX20_MOUSE	Ddx20	Probable ATP-dependent RNA helicase DDX20	8.78838	3.1356	3.58829e-26	1.35836e-24
sp|Q8VHK9|DHX36_MOUSE	Q8VHK9	DHX36_MOUSE	Dhx36	ATP-dependent RNA helicase DHX36	8.71934	3.12422	5.38988e-26	2.01385e-24
sp|Q69ZR9|F208A_MOUSE	Q69ZR9	F208A_MOUSE	Fam208a	Protein FAM208A	8.70063	3.12112	6.01976e-26	2.22037e-24
sp|Q99MX1|UBP26_MOUSE	Q99MX1	UBP26_MOUSE	Usp26	Ubiquitin carboxyl-terminal hydrolase 26	8.50172	3.08775	1.96617e-25	7.16034e-24
sp|Q91ZF0|DJC24_MOUSE	Q91ZF0	DJC24_MOUSE	Dnajc24	DnaJ homolog subfamily C member 24	8.49674	3.08691	2.02566e-25	7.28478e-24
sp|Q62203|SF3A2_MOUSE	Q62203	SF3A2_MOUSE	Sf3a2	Splicing factor 3A subunit 2	8.44948	3.07886	2.68982e-25	9.55382e-24
sp|Q9CQQ4|GEMI2_MOUSE	Q9CQQ4	GEMI2_MOUSE	Gemin2	Gem-associated protein 2	8.21213	3.03776	1.13246e-24	3.97328e-23
sp|Q62189|SNRPA_MOUSE	Q62189	SNRPA_MOUSE	Snrpa	U1 small nuclear ribonucleoprotein A	8.09102	3.01632	2.37881e-24	8.24559e-23
sp|Q9DCT8|CRIP2_MOUSE	Q9DCT8	CRIP2_MOUSE	Crip2	Cysteine-rich protein 2	8.04504	3.0081	3.15816e-24	1.08167e-22
sp|P10639|THIO_MOUSE	P10639	THIO_MOUSE	Txn	Thioredoxin	7.9413	2.98937	6.00504e-24	2.03253e-22
sp|Q9EQM6|DGCR8_MOUSE	Q9EQM6	DGCR8_MOUSE	Dgcr8	Microprocessor complex subunit DGCR8	7.59384	2.92483	5.34283e-23	1.78736e-21
sp|Q6PFR5|TRA2A_MOUSE	Q6PFR5	TRA2A_MOUSE	Tra2a	Transformer-2 protein homolog alpha	7.5684	2.91999	6.28318e-23	2.07778e-21
sp|Q8CFE2|CD027_MOUSE	Q8CFE2	CD027_MOUSE	>sp|Q8CFE2|CD027_MOUSE	n/a	7.42607	2.8926	1.56444e-22	5.11465e-21
sp|P62320|SMD3_MOUSE	P62320	SMD3_MOUSE	Snrpd3	Small nuclear ribonucleoprotein Sm D3	7.23694	2.85538	5.33393e-22	1.72424e-20
tr|Q921K2|Q921K2_MOUSE	Q921K2	Q921K2_MOUSE	Parp1	Poly (ADP-ribose) polymerase family, member 1	7.14396	2.83672	9.80796e-22	3.13528e-20
sp|Q8BJW6|EIF2A_MOUSE	Q8BJW6	EIF2A_MOUSE	Eif2a	Eukaryotic translation initiation factor 2A	7.10983	2.82981	1.22783e-21	3.88184e-20
sp|Q8BX17|GEMI5_MOUSE	Q8BX17	GEMI5_MOUSE	Gemin5	Gem-associated protein 5	7.09849	2.82751	1.3231e-21	4.13756e-20
sp|Q640M1|UT14A_MOUSE	Q640M1	UT14A_MOUSE	Utp14a	U3 small nucleolar RNA-associated protein 14 homolog A	6.95752	2.79857	3.36831e-21	1.042e-19
sp|Q8C9B9|DIDO1_MOUSE	Q8C9B9	DIDO1_MOUSE	Dido1	Death-inducer obliterator 1	6.81232	2.76815	8.90823e-21	2.72649e-19
sp|P14069|S10A6_MOUSE	P14069	S10A6_MOUSE	S100a6	Protein S100-A6	6.78966	2.76334	1.03779e-20	3.14287e-19
sp|P27048|RSMB_MOUSE	P27048	RSMB_MOUSE	Snrpb	Small nuclear ribonucleoprotein-associated protein B	6.78276	2.76187	1.08722e-20	3.25827e-19
sp|Q9D0W5|PPIL1_MOUSE	Q9D0W5	PPIL1_MOUSE	Ppil1	Peptidyl-prolyl cis-trans isomerase-like 1	6.73272	2.75119	1.52497e-20	4.52303e-19
sp|Q9R0U0|SRS10_MOUSE	Q9R0U0	SRS10_MOUSE	Srsf10	Serine/arginine-rich splicing factor 10	6.70217	2.74463	1.87605e-20	5.50755e-19
sp|P62305|RUXE_MOUSE	P62305	RUXE_MOUSE	Snrpe	Small nuclear ribonucleoprotein E	6.4724	2.6943	9.04928e-20	2.62978e-18
sp|Q569Z6|TR150_MOUSE	Q569Z6	TR150_MOUSE	Thrap3	Thyroid hormone receptor-associated protein 3	6.36985	2.67126	1.84278e-19	5.30169e-18
sp|Q9Z2X1|HNRPF_MOUSE	Q9Z2X1	HNRPF_MOUSE	Hnrnpf	Heterogeneous nuclear ribonucleoprotein F	6.30646	2.65683	2.86811e-19	8.16986e-18
sp|Q9QX47|SON_MOUSE	Q9QX47	SON_MOUSE	Son	Protein SON	6.25953	2.64606	3.98495e-19	1.12399e-17
sp|P97315|CSRP1_MOUSE	P97315	CSRP1_MOUSE	Csrp1	Cysteine and glycine-rich protein 1	6.23772	2.64102	4.64503e-19	1.29745e-17
sp|Q8BK67|RCC2_MOUSE	Q8BK67	RCC2_MOUSE	Rcc2	Protein RCC2	6.21849	2.63656	5.31838e-19	1.47125e-17
sp|Q8CH25|SLTM_MOUSE	Q8CH25	SLTM_MOUSE	Sltm	SAFB-like transcription modulator	6.1093	2.61101	1.15134e-18	3.15467e-17
sp|Q5SUF2|LC7L3_MOUSE	Q5SUF2	LC7L3_MOUSE	Luc7l3	Luc7-like protein 3	6.08903	2.60621	1.32975e-18	3.60913e-17
sp|Q9CQM9|GLRX3_MOUSE	Q9CQM9	GLRX3_MOUSE	Glrx3	Glutaredoxin-3	6.01645	2.58891	2.2318e-18	6.00082e-17
tr|S4R1W5|S4R1W5_MOUSE	S4R1W5	S4R1W5_MOUSE	Rbm6	Protein Rbm6	5.99428	2.58359	2.61587e-18	6.9684e-17
sp|Q9CQT2|RBM7_MOUSE	Q9CQT2	RBM7_MOUSE	Rbm7	RNA-binding protein 7	5.98765	2.58199	2.74316e-18	7.24044e-17
sp|Q3UYV9|NCBP1_MOUSE	Q3UYV9	NCBP1_MOUSE	Ncbp1	Nuclear cap-binding protein subunit 1	5.97243	2.57832	3.05979e-18	8.00274e-17
sp|Q8BJY1|PSMD5_MOUSE	Q8BJY1	PSMD5_MOUSE	Psmd5	26S proteasome non-ATPase regulatory subunit 5	5.92248	2.5662	4.38286e-18	1.13599e-16
sp|Q7TMF2|ERI1_MOUSE	Q7TMF2	ERI1_MOUSE	Eri1	3'-5' exoribonuclease 1	5.91797	2.5651	4.52742e-18	1.16298e-16
sp|Q0P678|ZCH18_MOUSE	Q0P678	ZCH18_MOUSE	Zc3h18	Zinc finger CCCH domain-containing protein 18	5.84245	2.54657	7.81767e-18	1.99039e-16
sp|Q62241|RU1C_MOUSE	Q62241	RU1C_MOUSE	Snrpc	U1 small nuclear ribonucleoprotein C	5.80432	2.53713	1.03124e-17	2.60253e-16
sp|P62315|SMD1_MOUSE	P62315	SMD1_MOUSE	Snrpd1	Small nuclear ribonucleoprotein Sm D1	5.78788	2.53303	1.16238e-17	2.90797e-16
sp|Q9ERI5|JMJD6_MOUSE	Q9ERI5	JMJD6_MOUSE	Jmjd6	Bifunctional arginine demethylase and lysyl-hydroxylase JMJD6	5.72873	2.51821	1.79036e-17	4.44041e-16
sp|Q9CYA6|ZCHC8_MOUSE	Q9CYA6	ZCHC8_MOUSE	Zcchc8	Zinc finger CCHC domain-containing protein 8	5.66699	2.50258	2.8164e-17	6.92545e-16
sp|Q99JX7|NXF1_MOUSE	Q99JX7	NXF1_MOUSE	Nxf1	Nuclear RNA export factor 1	5.65179	2.49871	3.14976e-17	7.67953e-16
sp|O35326|SRSF5_MOUSE	O35326	SRSF5_MOUSE	Srsf5	Serine/arginine-rich splicing factor 5	5.59878	2.48511	4.65792e-17	1.12612e-15
sp|Q8BUI3|LRWD1_MOUSE	Q8BUI3	LRWD1_MOUSE	LRWD1	Leucine-rich repeat and WD repeat-containing protein 1	5.47671	2.45331	1.15412e-16	2.76701e-15
sp|Q9Z2I8|SUCB2_MOUSE	Q9Z2I8	SUCB2_MOUSE	Suclg2	Succinyl-CoA ligase [GDP-forming] subunit beta, mitochondrial	5.46891	2.45125	1.22332e-16	2.90868e-15
sp|P62309|RUXG_MOUSE	P62309	RUXG_MOUSE	Snrpg	Small nuclear ribonucleoprotein G	5.44619	2.44525	1.44999e-16	3.41937e-15
sp|Q00PI9|HNRL2_MOUSE	Q00PI9	HNRL2_MOUSE	Hnrnpul2	Heterogeneous nuclear ribonucleoprotein U-like protein 2	5.36965	2.42483	2.57655e-16	6.02661e-15
sp|P62996|TRA2B_MOUSE	P62996	TRA2B_MOUSE	Tra2b	Transformer-2 protein homolog beta	5.3603	2.42231	2.76476e-16	6.41469e-15
sp|A2AJT4|PNISR_MOUSE	A2AJT4	PNISR_MOUSE	Pnisr	Arginine/serine-rich protein PNISR	5.33365	2.41512	3.38091e-16	7.78149e-15
sp|P70122|SBDS_MOUSE	P70122	SBDS_MOUSE	Sbds	Ribosome maturation protein SBDS	5.3172	2.41067	3.82865e-16	8.74209e-15
sp|Q61545|EWS_MOUSE	Q61545	EWS_MOUSE	Ewsr1	RNA-binding protein EWS	5.27816	2.40004	5.14695e-16	1.16597e-14
sp|Q8BL97|SRSF7_MOUSE	Q8BL97	SRSF7_MOUSE	Srsf7	Serine/arginine-rich splicing factor 7	5.26619	2.39676	5.63703e-16	1.26701e-14
sp|Q8BTI8|SRRM2_MOUSE	Q8BTI8	SRRM2_MOUSE	Srrm2	Serine/arginine repetitive matrix protein 2	5.26465	2.39634	5.70341e-16	1.27199e-14
sp|O55128|SAP18_MOUSE	O55128	SAP18_MOUSE	Sap18	Histone deacetylase complex subunit SAP18	5.18716	2.37495	1.02966e-15	2.27872e-14
sp|P97311|MCM6_MOUSE	P97311	MCM6_MOUSE	Mcm6	DNA replication licensing factor MCM6	5.14052	2.36192	1.472e-15	3.23278e-14
sp|Q9CX83|ARMX1_MOUSE	Q9CX83	ARMX1_MOUSE	Armcx1	Armadillo repeat-containing X-linked protein 1	5.06119	2.33948	2.712e-15	5.91093e-14
sp|Q9D3U0|PUS10_MOUSE	Q9D3U0	PUS10_MOUSE	Pus10	Putative tRNA pseudouridine synthase Pus10	5.0505	2.33643	2.94583e-15	6.3723e-14
sp|P62317|SMD2_MOUSE	P62317	SMD2_MOUSE	Snrpd2	Small nuclear ribonucleoprotein Sm D2	5.00966	2.32471	4.0422e-15	8.67867e-14
sp|Q9Z2N8|ACL6A_MOUSE	Q9Z2N8	ACL6A_MOUSE	Actl6a	Actin-like protein 6A	5.00798	2.32423	4.09526e-15	8.72746e-14
tr|Q3UIX4|Q3UIX4_MOUSE	Q3UIX4	Q3UIX4_MOUSE	Srsf11	Protein Srsf11	4.96329	2.3113	5.79729e-15	1.22638e-13
tr|Q8CCB2|Q8CCB2_MOUSE	Q8CCB2	Q8CCB2_MOUSE	Zfp207	BUB3-interacting and GLEBS motif-containing protein ZNF207	4.93058	2.30176	7.48264e-15	1.57135e-13
sp|O35613|DAXX_MOUSE	O35613	DAXX_MOUSE	Daxx	Death domain-associated protein 6	4.84918	2.27774	1.41629e-14	2.93804e-13
sp|Q9D0L8|MCES_MOUSE	Q9D0L8	MCES_MOUSE	Rnmt	mRNA cap guanine-N7 methyltransferase	4.84889	2.27766	1.41949e-14	2.93804e-13
tr|Q3UJB0|Q3UJB0_MOUSE	Q3UJB0	Q3UJB0_MOUSE	Sf3b2	Protein Sf3b2	4.80851	2.26559	1.95124e-14	4.00981e-13
sp|Q9ER69|FL2D_MOUSE	Q9ER69	FL2D_MOUSE	Wtap	Pre-mRNA-splicing regulator WTAP	4.80289	2.2639	2.03969e-14	4.16183e-13
sp|Q8C0C7|SYFA_MOUSE	Q8C0C7	SYFA_MOUSE	Farsa	Phenylalanine--tRNA ligase alpha subunit	4.79401	2.26123	2.18802e-14	4.43305e-13
sp|Q6P8I4|PCNP_MOUSE	Q6P8I4	PCNP_MOUSE	Pcnp	PEST proteolytic signal-containing nuclear protein	4.75995	2.25095	2.86473e-14	5.76352e-13
sp|Q9Z204-2|HNRPC_MOUSE	Q9Z204-2	HNRPC_MOUSE	Hnrnpc	Isoform C1 of Heterogeneous nuclear ribonucleoproteins C1/C2	4.71215	2.23639	4.18687e-14	8.36501e-13
sp|Q52KE7|CCNL1_MOUSE	Q52KE7	CCNL1_MOUSE	Ccnl1	Cyclin-L1	4.68144	2.22695	5.34731e-14	1.06098e-12
sp|Q07417|ACADS_MOUSE	Q07417	ACADS_MOUSE	Acads	Short-chain specific acyl-CoA dehydrogenase, mitochondrial	4.66759	2.22268	5.97233e-14	1.17688e-12
sp|A2RTL5|RSRC2_MOUSE	A2RTL5	RSRC2_MOUSE	Rsrc2	Arginine/serine-rich coiled-coil protein 2	4.65899	2.22002	6.39695e-14	1.25197e-12
sp|Q924C1|XPO5_MOUSE	Q924C1	XPO5_MOUSE	Xpo5	Exportin-5	4.63544	2.21271	7.72292e-14	1.50127e-12
sp|Q8BP48|MAP11_MOUSE	Q8BP48	MAP11_MOUSE	Metap1	Methionine aminopeptidase 1	4.61999	2.20789	8.74078e-14	1.68773e-12
sp|Q91W39|NCOA5_MOUSE	Q91W39	NCOA5_MOUSE	Ncoa5	Nuclear receptor coactivator 5	4.57726	2.19449	1.23189e-13	2.36276e-12
sp|P70677|CASP3_MOUSE	P70677	CASP3_MOUSE	Casp3	Caspase-3	4.55952	2.18888	1.42112e-13	2.70765e-12
sp|Q8CGZ0|CHERP_MOUSE	Q8CGZ0	CHERP_MOUSE	Cherp	Calcium homeostasis endoplasmic reticulum protein	4.52981	2.17945	1.80601e-13	3.41834e-12
sp|P84104|SRSF3_MOUSE	P84104	SRSF3_MOUSE	Srsf3	Serine/arginine-rich splicing factor 3	4.47597	2.1622	2.79266e-13	5.2513e-12
sp|Q9QUR7|PIN1_MOUSE	Q9QUR7	PIN1_MOUSE	Pin1	Peptidyl-prolyl cis-trans isomerase NIMA-interacting 1	4.45417	2.15516	3.33348e-13	6.22755e-12
sp|B2RY56|RBM25_MOUSE	B2RY56	RBM25_MOUSE	Rbm25	RNA-binding protein 25	4.4519	2.15442	3.39555e-13	6.30258e-12
sp|Q8BH50|CR025_MOUSE	Q8BH50	CR025_MOUSE	>sp|Q8BH50|CR025_MOUSE	n/a	4.44622	2.15258	3.55609e-13	6.55826e-12
sp|A6H619|PHRF1_MOUSE	A6H619	PHRF1_MOUSE	Phrf1	PHD and RING finger domain-containing protein 1	4.43312	2.14832	3.95629e-13	7.24984e-12
sp|Q8C2Q3|RBM14_MOUSE	Q8C2Q3	RBM14_MOUSE	Rbm14	RNA-binding protein 14	4.41794	2.14337	4.47715e-13	8.15238e-12
sp|Q6NVF9|CPSF6_MOUSE	Q6NVF9	CPSF6_MOUSE	Cpsf6	Cleavage and polyadenylation specificity factor subunit 6	4.40398	2.13881	5.01699e-13	9.07791e-12
sp|P28659|CELF1_MOUSE	P28659	CELF1_MOUSE	Celf1	CUGBP Elav-like family member 1	4.39363	2.13541	5.45959e-13	9.81703e-12
sp|Q91VC3|IF4A3_MOUSE	Q91VC3	IF4A3_MOUSE	Eif4a3	Eukaryotic initiation factor 4A-III	4.38175	2.13151	6.01624e-13	1.07508e-11
sp|Q64213|SF01_MOUSE	Q64213	SF01_MOUSE	Sf1	Splicing factor 1	4.37229	2.12839	6.5005e-13	1.15444e-11
sp|Q8R205|ZC3HA_MOUSE	Q8R205	ZC3HA_MOUSE	Zc3h10	Zinc finger CCCH domain-containing protein 10	4.36846	2.12713	6.70714e-13	1.18383e-11
sp|Q6PE01|SNR40_MOUSE	Q6PE01	SNR40_MOUSE	Snrnp40	U5 small nuclear ribonucleoprotein 40 kDa protein	4.36029	2.12442	7.17166e-13	1.2581e-11
sp|Q8CEC6|PPWD1_MOUSE	Q8CEC6	PPWD1_MOUSE	Ppwd1	Peptidylprolyl isomerase domain and WD repeat-containing protein 1	4.35084	2.12129	7.74897e-13	1.35114e-11
sp|Q8K0D5|EFGM_MOUSE	Q8K0D5	EFGM_MOUSE	Gfm1	Elongation factor G, mitochondrial	4.34789	2.12032	7.93863e-13	1.37587e-11
tr|E9Q784|E9Q784_MOUSE	E9Q784	E9Q784_MOUSE	Zc3h13	Protein Zc3h13	4.31674	2.10994	1.02526e-12	1.76627e-11
sp|Q6NV83|SR140_MOUSE	Q6NV83	SR140_MOUSE	U2surp	U2 snRNP-associated SURP motif-containing protein	4.31559	2.10956	1.035e-12	1.77244e-11
sp|Q61656|DDX5_MOUSE	Q61656	DDX5_MOUSE	Ddx5	Probable ATP-dependent RNA helicase DDX5	4.30099	2.10467	1.16716e-12	1.98694e-11
sp|Q9D0Q7|RM45_MOUSE	Q9D0Q7	RM45_MOUSE	Mrpl45	39S ribosomal protein L45, mitochondrial	4.28546	2.09945	1.32638e-12	2.24471e-11
sp|P16858|G3P_MOUSE	P16858	G3P_MOUSE	Gapdh	Glyceraldehyde-3-phosphate dehydrogenase	4.26546	2.0927	1.56444e-12	2.6321e-11
sp|Q5SFM8|RBM27_MOUSE	Q5SFM8	RBM27_MOUSE	Rbm27	RNA-binding protein 27	4.19536	2.06879	2.79552e-12	4.676e-11
sp|O70456|1433S_MOUSE	O70456	1433S_MOUSE	Sfn	14-3-3 protein sigma	4.1759	2.06209	3.28638e-12	5.46528e-11
sp|Q9WUA3|K6PP_MOUSE	Q9WUA3	K6PP_MOUSE	Pfkp	ATP-dependent 6-phosphofructokinase, platelet type	4.16169	2.05717	3.69911e-12	6.11628e-11
sp|Q8R4N0|CLYBL_MOUSE	Q8R4N0	CLYBL_MOUSE	Clybl	Citrate lyase subunit beta-like protein, mitochondrial	4.15968	2.05647	3.76153e-12	6.18395e-11
sp|Q8VDW0|DX39A_MOUSE	Q8VDW0	DX39A_MOUSE	Ddx39a	ATP-dependent RNA helicase DDX39A	4.14822	2.05249	4.13836e-12	6.76481e-11
sp|Q9WU62|INCE_MOUSE	Q9WU62	INCE_MOUSE	Incenp	Inner centromere protein	4.0265	2.00953	1.14764e-11	1.86541e-10
sp|Q99KG3|RBM10_MOUSE	Q99KG3	RBM10_MOUSE	Rbm10	RNA-binding protein 10	4.02128	2.00765	1.19924e-11	1.93832e-10
sp|P43247|MSH2_MOUSE	P43247	MSH2_MOUSE	Msh2	DNA mismatch repair protein Msh2	3.99851	1.99946	1.45309e-11	2.3355e-10
tr|E9PW44|E9PW44_MOUSE	E9PW44	E9PW44_MOUSE	Ythdc1	YTH domain-containing protein 1	3.98887	1.99598	1.5763e-11	2.51945e-10
sp|Q9CSN1|SNW1_MOUSE	Q9CSN1	SNW1_MOUSE	Snw1	SNW domain-containing protein 1	3.98322	1.99394	1.65336e-11	2.62801e-10
sp|Q8K1J6|TRNT1_MOUSE	Q8K1J6	TRNT1_MOUSE	Trnt1	CCA tRNA nucleotidyltransferase 1, mitochondrial	3.97731	1.99179	1.73808e-11	2.7475e-10
sp|Q80W00|PP1RA_MOUSE	Q80W00	PP1RA_MOUSE	Ppp1r10	Serine/threonine-protein phosphatase 1 regulatory subunit 10	3.97654	1.99151	1.74947e-11	2.7504e-10
sp|Q9CQL1|MGN2_MOUSE	Q9CQL1	MGN2_MOUSE	Magohb	Protein mago nashi homolog 2	3.95825	1.98486	2.04221e-11	3.19318e-10
sp|Q8VH51|RBM39_MOUSE	Q8VH51	RBM39_MOUSE	Rbm39	RNA-binding protein 39	3.94045	1.97836	2.37482e-11	3.69316e-10
sp|P84089|ERH_MOUSE	P84089	ERH_MOUSE	Erh	Enhancer of rudimentary homolog	3.90667	1.96594	3.1639e-11	4.89384e-10
sp|P62962|PROF1_MOUSE	P62962	PROF1_MOUSE	Pfn1	Profilin-1	3.88816	1.95909	3.70377e-11	5.69825e-10
sp|Q9CQV5|RT24_MOUSE	Q9CQV5	RT24_MOUSE	Mrps24	28S ribosomal protein S24, mitochondrial	3.84446	1.94278	5.3772e-11	8.22883e-10
sp|E9Q5F9|SETD2_MOUSE	E9Q5F9	SETD2_MOUSE	Setd2	Histone-lysine N-methyltransferase SETD2	3.7949	1.92406	8.21948e-11	1.25119e-09
sp|Q91VM9|IPYR2_MOUSE	Q91VM9	IPYR2_MOUSE	Ppa2	Inorganic pyrophosphatase 2, mitochondrial	3.77888	1.91796	9.43153e-11	1.42813e-09
sp|Q91YJ5|IF2M_MOUSE	Q91YJ5	IF2M_MOUSE	Mtif2	Translation initiation factor IF-2, mitochondrial	3.75696	1.90957	1.13881e-10	1.71537e-09
sp|Q922V4|PLRG1_MOUSE	Q922V4	PLRG1_MOUSE	Plrg1	Pleiotropic regulator 1	3.74601	1.90535	1.25142e-10	1.87518e-09
sp|Q99K48|NONO_MOUSE	Q99K48	NONO_MOUSE	Nono	Non-POU domain-containing octamer-binding protein	3.73523	1.9012	1.37322e-10	2.04702e-09
tr|Q80X98|Q80X98_MOUSE	Q80X98	Q80X98_MOUSE	Dhx38	DEAH (Asp-Glu-Ala-His) box polypeptide 38	3.68282	1.88081	2.1595e-10	3.20252e-09
sp|Q8BWT1|THIM_MOUSE	Q8BWT1	THIM_MOUSE	Acaa2	3-ketoacyl-CoA thiolase, mitochondrial	3.66683	1.87453	2.48036e-10	3.65949e-09
sp|Q01320|TOP2A_MOUSE	Q01320	TOP2A_MOUSE	Top2a	DNA topoisomerase 2-alpha	3.6388	1.86346	3.16338e-10	4.6434e-09
sp|P54276|MSH6_MOUSE	P54276	MSH6_MOUSE	Msh6	DNA mismatch repair protein Msh6	3.62605	1.8584	3.53401e-10	5.16109e-09
sp|Q91WM2|CECR5_MOUSE	Q91WM2	CECR5_MOUSE	Cecr5	Cat eye syndrome critical region protein 5 homolog	3.61518	1.85407	3.88446e-10	5.64424e-09
sp|Q6A068|CDC5L_MOUSE	Q6A068	CDC5L_MOUSE	Cdc5l	Cell division cycle 5-like protein	3.59023	1.84408	4.82698e-10	6.97851e-09
sp|P27612|PLAP_MOUSE	P27612	PLAP_MOUSE	Plaa	Phospholipase A-2-activating protein	3.57502	1.83795	5.51182e-10	7.89076e-09
sp|O88532|ZFR_MOUSE	O88532	ZFR_MOUSE	Zfr	Zinc finger RNA-binding protein	3.575	1.83794	5.51284e-10	7.89076e-09
tr|G5E924|G5E924_MOUSE	G5E924	G5E924_MOUSE	Hnrnpl	Heterogeneous nuclear ribonucleoprotein L (Fragment)	3.49432	1.80501	1.11726e-09	1.59126e-08
sp|P58501|PAXB1_MOUSE	P58501	PAXB1_MOUSE	Paxbp1	PAX3- and PAX7-binding protein 1	3.48856	1.80263	1.17517e-09	1.66551e-08
sp|Q80Y84|KDM5B_MOUSE	Q80Y84	KDM5B_MOUSE	Kdm5b	Lysine-specific demethylase 5B	3.46006	1.7908	1.50999e-09	2.12953e-08
sp|Q8VDG3|PARN_MOUSE	Q8VDG3	PARN_MOUSE	Parn	Poly(A)-specific ribonuclease PARN	3.45006	1.78662	1.6489e-09	2.3141e-08
sp|Q8K4P0|WDR33_MOUSE	Q8K4P0	WDR33_MOUSE	Wdr33	pre-mRNA 3' end processing protein WDR33	3.44431	1.78422	1.73464e-09	2.4226e-08
sp|Q99KP6|PRP19_MOUSE	Q99KP6	PRP19_MOUSE	Prpf19	Pre-mRNA-processing factor 19	3.4382	1.78165	1.83062e-09	2.54429e-08
sp|Q99MZ7|PECR_MOUSE	Q99MZ7	PECR_MOUSE	Pecr	Peroxisomal trans-2-enoyl-CoA reductase	3.42402	1.77569	2.07453e-09	2.86944e-08
sp|Q587J6|LITD1_MOUSE	Q587J6	LITD1_MOUSE	L1td1	LINE-1 type transposase domain-containing protein 1	3.42088	1.77437	2.13293e-09	2.93609e-08
sp|Q9JII5|DAZP1_MOUSE	Q9JII5	DAZP1_MOUSE	Dazap1	DAZ-associated protein 1	3.39979	1.76545	2.56969e-09	3.52048e-08
sp|Q9WTQ5|AKA12_MOUSE	Q9WTQ5	AKA12_MOUSE	Akap12	A-kinase anchor protein 12	3.39687	1.76421	2.63686e-09	3.59537e-08
sp|Q05920|PYC_MOUSE	Q05920	PYC_MOUSE	Pc	Pyruvate carboxylase, mitochondrial	3.39316	1.76263	2.72491e-09	3.69791e-08
sp|Q8VE97|SRSF4_MOUSE	Q8VE97	SRSF4_MOUSE	Srsf4	Serine/arginine-rich splicing factor 4	3.38286	1.75824	2.98491e-09	4.03173e-08
sp|P62077|TIM8B_MOUSE	P62077	TIM8B_MOUSE	Timm8b	Mitochondrial import inner membrane translocase subunit Tim8 B	3.3706	1.753	3.32744e-09	4.47339e-08
sp|P63154|CRNL1_MOUSE	P63154	CRNL1_MOUSE	Crnkl1	Crooked neck-like protein 1	3.34696	1.74285	4.10336e-09	5.49087e-08
sp|P83877|TXN4A_MOUSE	P83877	TXN4A_MOUSE	Txnl4a	Thioredoxin-like protein 4A	3.32683	1.73415	4.90645e-09	6.53512e-08
sp|Q60759|GCDH_MOUSE	Q60759	GCDH_MOUSE	Gcdh	Glutaryl-CoA dehydrogenase, mitochondrial	3.3091	1.72644	5.74426e-09	7.61577e-08
sp|Q99020|ROAA_MOUSE	Q99020	ROAA_MOUSE	Hnrnpab	Heterogeneous nuclear ribonucleoprotein A/B	3.30438	1.72438	5.9911e-09	7.9066e-08
sp|Q99MN9|PCCB_MOUSE	Q99MN9	PCCB_MOUSE	Pccb	Propionyl-CoA carboxylase beta chain, mitochondrial	3.30264	1.72362	6.08419e-09	7.99279e-08
sp|Q99NB9|SF3B1_MOUSE	Q99NB9	SF3B1_MOUSE	Sf3b1	Splicing factor 3B subunit 1	3.29424	1.71994	6.55714e-09	8.57495e-08
sp|Q99MR6|SRRT_MOUSE	Q99MR6	SRRT_MOUSE	Srrt	Serrate RNA effector molecule homolog	3.27826	1.71293	7.56069e-09	9.84258e-08
sp|Q3URE1|ACSF3_MOUSE	Q3URE1	ACSF3_MOUSE	Acsf3	Acyl-CoA synthetase family member 3, mitochondrial	3.26235	1.70591	8.71381e-09	1.12926e-07
sp|Q91VT4|CBR4_MOUSE	Q91VT4	CBR4_MOUSE	Cbr4	Carbonyl reductase family member 4	3.24955	1.70024	9.76843e-09	1.26026e-07
sp|Q8BG05|ROA3_MOUSE	Q8BG05	ROA3_MOUSE	Hnrnpa3	Heterogeneous nuclear ribonucleoprotein A3	3.23141	1.69217	1.14879e-08	1.47548e-07
sp|Q8K194|SNR27_MOUSE	Q8K194	SNR27_MOUSE	Snrnp27	U4/U6.U5 small nuclear ribonucleoprotein 27 kDa protein	3.2275	1.69041	1.18979e-08	1.52134e-07
sp|Q5SWU9|ACACA_MOUSE	Q5SWU9	ACACA_MOUSE	Acaca	Acetyl-CoA carboxylase 1	3.22475	1.68919	1.21942e-08	1.55234e-07
sp|Q8BH04|PCKGM_MOUSE	Q8BH04	PCKGM_MOUSE	Pck2	Phosphoenolpyruvate carboxykinase [GTP], mitochondrial	3.21104	1.68304	1.37857e-08	1.7472e-07
sp|Q8VEK3|HNRPU_MOUSE	Q8VEK3	HNRPU_MOUSE	Hnrnpu	Heterogeneous nuclear ribonucleoprotein U	3.20109	1.67856	1.50713e-08	1.90176e-07
sp|Q6P4T2|U520_MOUSE	Q6P4T2	U520_MOUSE	Snrnp200	U5 small nuclear ribonucleoprotein 200 kDa helicase	3.19591	1.67623	1.57884e-08	1.98355e-07
sp|Q61881|MCM7_MOUSE	Q61881	MCM7_MOUSE	Mcm7	DNA replication licensing factor MCM7	3.18362	1.67067	1.76276e-08	2.20498e-07
sp|Q9D902|T2EB_MOUSE	Q9D902	T2EB_MOUSE	Gtf2e2	General transcription factor IIE subunit 2	3.17794	1.66809	1.85496e-08	2.31026e-07
sp|Q8K411|PREP_MOUSE	Q8K411	PREP_MOUSE	Pitrm1	Presequence protease, mitochondrial	3.15388	1.65713	2.30237e-08	2.85513e-07
sp|Q8JZY4|MRRP3_MOUSE	Q8JZY4	MRRP3_MOUSE	Kiaa0391	Mitochondrial ribonuclease P protein 3	3.15215	1.65633	2.33862e-08	2.88765e-07
sp|Q3ULD5|MCCB_MOUSE	Q3ULD5	MCCB_MOUSE	Mccc2	Methylcrotonoyl-CoA carboxylase beta chain, mitochondrial	3.14145	1.65143	2.57467e-08	3.16552e-07
sp|Q8BL74|TF3C2_MOUSE	Q8BL74	TF3C2_MOUSE	Gtf3c2	General transcription factor 3C polypeptide 2	3.13349	1.64777	2.766e-08	3.37874e-07
sp|Q9D287|SPF27_MOUSE	Q9D287	SPF27_MOUSE	Bcas2	Pre-mRNA-splicing factor SPF27	3.13326	1.64767	2.77158e-08	3.37874e-07
sp|O88271|CFDP1_MOUSE	O88271	CFDP1_MOUSE	Cfdp1	Craniofacial development protein 1	3.13017	1.64624	2.85e-08	3.45968e-07
sp|Q9Z2Z9|GFPT2_MOUSE	Q9Z2Z9	GFPT2_MOUSE	Gfpt2	Glutamine--fructose-6-phosphate aminotransferase [isomerizing] 2	3.12941	1.64589	2.86934e-08	3.46853e-07
sp|P70318|TIAR_MOUSE	P70318	TIAR_MOUSE	Tial1	Nucleolysin TIAR	3.10211	1.63325	3.66974e-08	4.41751e-07
sp|Q9CQH3|NDUB5_MOUSE	Q9CQH3	NDUB5_MOUSE	Ndufb5	NADH dehydrogenase [ubiquinone] 1 beta subcomplex subunit 5, mitochondrial	3.10064	1.63256	3.71873e-08	4.45783e-07
sp|Q9R0M6|RAB9A_MOUSE	Q9R0M6	RAB9A_MOUSE	Rab9a	Ras-related protein Rab-9A	3.09929	1.63194	3.76409e-08	4.49348e-07
sp|Q810A7|DDX42_MOUSE	Q810A7	DDX42_MOUSE	Ddx42	ATP-dependent RNA helicase DDX42	3.08707	1.62624	4.20317e-08	4.99691e-07
sp|Q99LC3|NDUAA_MOUSE	Q99LC3	NDUAA_MOUSE	Ndufa10	NADH dehydrogenase [ubiquinone] 1 alpha subcomplex subunit 10, mitochondrial	3.07145	1.61892	4.83971e-08	5.72998e-07
sp|P63101|1433Z_MOUSE	P63101	1433Z_MOUSE	Ywhaz	14-3-3 protein zeta/delta	3.07028	1.61837	4.89122e-08	5.76723e-07
sp|Q8CHT0|AL4A1_MOUSE	Q8CHT0	AL4A1_MOUSE	Aldh4a1	Delta-1-pyrroline-5-carboxylate dehydrogenase, mitochondrial	3.06391	1.61537	5.1809e-08	6.08386e-07
sp|Q8BIQ5|CSTF2_MOUSE	Q8BIQ5	CSTF2_MOUSE	Cstf2	Cleavage stimulation factor subunit 2	3.03552	1.60194	6.69774e-08	7.83309e-07
sp|P48962|ADT1_MOUSE	P48962	ADT1_MOUSE	Slc25a4	ADP/ATP translocase 1	3.02523	1.59705	7.35194e-08	8.56337e-07
sp|Q8K310|MATR3_MOUSE	Q8K310	MATR3_MOUSE	Matr3	Matrin-3	3.02148	1.59525	7.60627e-08	8.82388e-07
sp|Q14CH7|SYAM_MOUSE	Q14CH7	SYAM_MOUSE	Aars2	Alanine--tRNA ligase, mitochondrial	3.01131	1.59039	8.34013e-08	9.63637e-07
sp|Q5SSK3|TEFM_MOUSE	Q5SSK3	TEFM_MOUSE	Tefm	Transcription elongation factor, mitochondrial	2.99304	1.58161	9.84336e-08	1.13277e-06
sp|Q9WV02|RBMX_MOUSE	Q9WV02	RBMX_MOUSE	Rbmx	RNA-binding motif protein, X chromosome	2.99037	1.58032	1.00849e-07	1.15595e-06
sp|P45952|ACADM_MOUSE	P45952	ACADM_MOUSE	Acadm	Medium-chain specific acyl-CoA dehydrogenase, mitochondrial	2.98347	1.57699	1.07366e-07	1.22576e-06
sp|Q4FK66|PR38A_MOUSE	Q4FK66	PR38A_MOUSE	Prpf38a	Pre-mRNA-splicing factor 38A	2.96852	1.56974	1.22987e-07	1.39855e-06
sp|P48377|RFX1_MOUSE	P48377	RFX1_MOUSE	Rfx1	MHC class II regulatory factor RFX1	2.96672	1.56887	1.25009e-07	1.41595e-06
sp|Q91Z49|UIF_MOUSE	Q91Z49	UIF_MOUSE	Fyttd1	UAP56-interacting factor	2.96448	1.56778	1.27586e-07	1.43947e-06
sp|Q8BZX4-2|SREK1_MOUSE	Q8BZX4-2	SREK1_MOUSE	Srek1	Isoform 2 of Splicing regulatory glutamine/lysine-rich protein 1	2.95149	1.56144	1.43576e-07	1.61355e-06
sp|Q8K4Z5|SF3A1_MOUSE	Q8K4Z5	SF3A1_MOUSE	Sf3a1	Splicing factor 3A subunit 1	2.94364	1.5576	1.54199e-07	1.72619e-06
sp|Q921G7|ETFD_MOUSE	Q921G7	ETFD_MOUSE	Etfdh	Electron transfer flavoprotein-ubiquinone oxidoreductase, mitochondrial	2.93954	1.55559	1.60073e-07	1.785e-06
sp|P26369|U2AF2_MOUSE	P26369	U2AF2_MOUSE	U2af2	Splicing factor U2AF 65 kDa subunit	2.92928	1.55055	1.75728e-07	1.95201e-06
sp|Q8CH02|SUGP1_MOUSE	Q8CH02	SUGP1_MOUSE	Sugp1	SURP and G-patch domain-containing protein 1	2.9255	1.54868	1.81896e-07	2.01275e-06
sp|Q91YR7|PRP6_MOUSE	Q91YR7	PRP6_MOUSE	Prpf6	Pre-mRNA-processing factor 6	2.9215	1.54671	1.88632e-07	2.07929e-06
sp|Q9DBL1|ACDSB_MOUSE	Q9DBL1	ACDSB_MOUSE	Acadsb	Short/branched chain specific acyl-CoA dehydrogenase, mitochondrial	2.91536	1.54367	1.99498e-07	2.19067e-06
sp|Q0VG62|CH059_MOUSE	Q0VG62	CH059_MOUSE	>sp|Q0VG62|CH059_MOUSE	n/a	2.90559	1.53883	2.18074e-07	2.38554e-06
sp|Q8VIJ6|SFPQ_MOUSE	Q8VIJ6	SFPQ_MOUSE	Sfpq	Splicing factor, proline- and glutamine-rich	2.89026	1.5312	2.50794e-07	2.73308e-06
sp|Q9D1L0|CHCH2_MOUSE	Q9D1L0	CHCH2_MOUSE	Chchd2	Coiled-coil-helix-coiled-coil-helix domain-containing protein 2, mitochondrial	2.88329	1.52772	2.67244e-07	2.90137e-06
sp|Q8VE38|OXND1_MOUSE	Q8VE38	OXND1_MOUSE	Oxnad1	Oxidoreductase NAD-binding domain-containing protein 1	2.88019	1.52617	2.74907e-07	2.97333e-06
sp|Q8JZN5|ACAD9_MOUSE	Q8JZN5	ACAD9_MOUSE	Acad9	Acyl-CoA dehydrogenase family member 9, mitochondrial	2.87247	1.52229	2.94985e-07	3.17855e-06
sp|Q925J9|MED1_MOUSE	Q925J9	MED1_MOUSE	Med1	Mediator of RNA polymerase II transcription subunit 1	2.8663	1.51919	3.12079e-07	3.35019e-06
sp|Q922E6|FAKD2_MOUSE	Q922E6	FAKD2_MOUSE	Fastkd2	FAST kinase domain-containing protein 2	2.85538	1.51368	3.4483e-07	3.68801e-06
sp|Q91ZA3|PCCA_MOUSE	Q91ZA3	PCCA_MOUSE	Pcca	Propionyl-CoA carboxylase alpha chain, mitochondrial	2.85469	1.51333	3.47017e-07	3.69766e-06
sp|O35691|PININ_MOUSE	O35691	PININ_MOUSE	Pnn	Pinin	2.8419	1.50686	3.90026e-07	4.14061e-06
sp|Q3UKJ7|SMU1_MOUSE	Q3UKJ7	SMU1_MOUSE	Smu1	WD40 repeat-containing protein SMU1	2.828	1.49978	4.42898e-07	4.68463e-06
sp|Q99KK9|SYHM_MOUSE	Q99KK9	SYHM_MOUSE	Hars2	Probable histidine--tRNA ligase, mitochondrial	2.82227	1.49686	4.66716e-07	4.91846e-06
sp|Q6PDM2|SRSF1_MOUSE	Q6PDM2	SRSF1_MOUSE	Srsf1	Serine/arginine-rich splicing factor 1	2.81881	1.49509	4.81732e-07	5.05818e-06
sp|Q8K215|LYRM4_MOUSE	Q8K215	LYRM4_MOUSE	Lyrm4	LYR motif-containing protein 4	2.79326	1.48195	6.08728e-07	6.3684e-06
sp|Q99J62|RFC4_MOUSE	Q99J62	RFC4_MOUSE	Rfc4	Replication factor C subunit 4	2.78979	1.48015	6.28406e-07	6.55045e-06
sp|Q9CQ20|M1IP1_MOUSE	Q9CQ20	M1IP1_MOUSE	Mid1ip1	Mid1-interacting protein 1	2.76362	1.46656	7.9877e-07	8.29625e-06
sp|P42125|ECI1_MOUSE	P42125	ECI1_MOUSE	Eci1	Enoyl-CoA delta isomerase 1, mitochondrial	2.76292	1.4662	8.03868e-07	8.31916e-06
sp|Q8CGF7|TCRG1_MOUSE	Q8CGF7	TCRG1_MOUSE	Tcerg1	Transcription elongation regulator 1	2.7613	1.46535	8.15887e-07	8.41329e-06
sp|Q8BVN4|MTER2_MOUSE	Q8BVN4	MTER2_MOUSE	Mterf4	Transcription termination factor 4, mitochondrial	2.75214	1.46055	8.87454e-07	9.11859e-06
sp|O88569|ROA2_MOUSE	O88569	ROA2_MOUSE	Hnrnpa2b1	Heterogeneous nuclear ribonucleoproteins A2/B1	2.7462	1.45744	9.37154e-07	9.59499e-06
sp|Q9CQR4|ACO13_MOUSE	Q9CQR4	ACO13_MOUSE	Acot13	Acyl-coenzyme A thioesterase 13	2.73956	1.45394	9.96077e-07	1.01621e-05
sp|Q8BGT7|SPF30_MOUSE	Q8BGT7	SPF30_MOUSE	Smndc1	Survival of motor neuron-related-splicing factor 30	2.7271	1.44737	1.11677e-06	1.13532e-05
sp|P24788|CD11B_MOUSE	P24788	CD11B_MOUSE	Cdk11b	Cyclin-dependent kinase 11B	2.72497	1.44624	1.13886e-06	1.1537e-05
sp|O55201|SPT5H_MOUSE	O55201	SPT5H_MOUSE	Supt5h	Transcription elongation factor SPT5	2.71763	1.44235	1.2183e-06	1.22984e-05
sp|Q5EE38|ACD_MOUSE	Q5EE38	ACD_MOUSE	Acd	Adrenocortical dysplasia protein	2.70678	1.43658	1.34595e-06	1.35395e-05
sp|O35280|CHK1_MOUSE	O35280	CHK1_MOUSE	Chek1	Serine/threonine-protein kinase Chk1	2.70005	1.43299	1.43183e-06	1.43532e-05
sp|Q3UEB3-2|PUF60_MOUSE	Q3UEB3-2	PUF60_MOUSE	Puf60	Isoform 2 of Poly(U)-binding-splicing factor PUF60	2.69653	1.4311	1.47892e-06	1.47738e-05
sp|Q32MW3|ACO10_MOUSE	Q32MW3	ACO10_MOUSE	Acot10	Acyl-coenzyme A thioesterase 10, mitochondrial	2.69217	1.42877	1.53933e-06	1.53241e-05
sp|P47791|GSHR_MOUSE	P47791	GSHR_MOUSE	Gsr	Glutathione reductase, mitochondrial	2.69003	1.42762	1.56996e-06	1.55751e-05
sp|Q91YE7|RBM5_MOUSE	Q91YE7	RBM5_MOUSE	Rbm5	RNA-binding protein 5	2.6837	1.42422	1.66403e-06	1.64516e-05
sp|P51174|ACADL_MOUSE	P51174	ACADL_MOUSE	Acadl	Long-chain specific acyl-CoA dehydrogenase, mitochondrial	2.68187	1.42324	1.69235e-06	1.66742e-05
sp|Q7TNC4|LC7L2_MOUSE	Q7TNC4	LC7L2_MOUSE	Luc7l2	Putative RNA-binding protein Luc7-like 2	2.67487	1.41947	1.80483e-06	1.77218e-05
sp|Q9Z1M8|RED_MOUSE	Q9Z1M8	RED_MOUSE	Ik	Protein Red	2.66927	1.41645	1.90019e-06	1.85947e-05
sp|Q9JHI5|IVD_MOUSE	Q9JHI5	IVD_MOUSE	Ivd	Isovaleryl-CoA dehydrogenase, mitochondrial	2.66881	1.41619	1.90838e-06	1.86115e-05
tr|E9Q4Z2|E9Q4Z2_MOUSE	E9Q4Z2	E9Q4Z2_MOUSE	Acacb	Protein Acacb	2.66302	1.41306	2.01275e-06	1.95631e-05
sp|Q9D0G0|RT30_MOUSE	Q9D0G0	RT30_MOUSE	Mrps30	28S ribosomal protein S30, mitochondrial	2.65307	1.40767	2.20559e-06	2.13653e-05
sp|Q99LI7|CSTF3_MOUSE	Q99LI7	CSTF3_MOUSE	Cstf3	Cleavage stimulation factor subunit 3	2.64392	1.40268	2.39946e-06	2.31266e-05
sp|A2AIV2|VIR_MOUSE	A2AIV2	VIR_MOUSE	Kiaa1429	Protein virilizer homolog	2.64374	1.40258	2.40349e-06	2.31266e-05
sp|Q9D824|FIP1_MOUSE	Q9D824	FIP1_MOUSE	Fip1l1	Pre-mRNA 3'-end-processing factor FIP1	2.63968	1.40036	2.4951e-06	2.3928e-05
sp|Q8BG81|PDIP3_MOUSE	Q8BG81	PDIP3_MOUSE	Poldip3	Polymerase delta-interacting protein 3	2.6371	1.39895	2.55503e-06	2.44213e-05
sp|P47738|ALDH2_MOUSE	P47738	ALDH2_MOUSE	Aldh2	Aldehyde dehydrogenase, mitochondrial	2.62491	1.39227	2.85844e-06	2.72309e-05
sp|Q9ERF3|WDR61_MOUSE	Q9ERF3	WDR61_MOUSE	Wdr61	WD repeat-containing protein 61	2.61753	1.38821	3.05949e-06	2.905e-05
sp|O08810|U5S1_MOUSE	O08810	U5S1_MOUSE	Eftud2	116 kDa U5 small nuclear ribonucleoprotein component	2.60679	1.38228	3.37759e-06	3.19649e-05
sp|Q80SY5|PR38B_MOUSE	Q80SY5	PR38B_MOUSE	Prpf38b	Pre-mRNA-splicing factor 38B	2.60387	1.38066	3.46992e-06	3.2731e-05
sp|D3Z7P3|GLSK_MOUSE	D3Z7P3	GLSK_MOUSE	Gls	Glutaminase kidney isoform, mitochondrial	2.59812	1.37747	3.65862e-06	3.43982e-05
sp|Q80XP8|FA76B_MOUSE	Q80XP8	FA76B_MOUSE	Fam76b	Protein FAM76B	2.59769	1.37723	3.67303e-06	3.44212e-05
sp|Q99MR8|MCCA_MOUSE	Q99MR8	MCCA_MOUSE	Mccc1	Methylcrotonoyl-CoA carboxylase subunit alpha, mitochondrial	2.58818	1.37194	4.00971e-06	3.73657e-05
sp|Q9CWT6|DDX28_MOUSE	Q9CWT6	DDX28_MOUSE	Ddx28	Probable ATP-dependent RNA helicase DDX28	2.58808	1.37188	4.01321e-06	3.73657e-05
sp|Q60749|KHDR1_MOUSE	Q60749	KHDR1_MOUSE	Khdrbs1	KH domain-containing, RNA-binding, signal transduction-associated protein 1	2.5765	1.36541	4.46522e-06	4.12877e-05
sp|P06151|LDHA_MOUSE	P06151	LDHA_MOUSE	Ldha	L-lactate dehydrogenase A chain	2.57627	1.36528	4.47492e-06	4.12877e-05
tr|D3YTQ3|D3YTQ3_MOUSE	D3YTQ3	D3YTQ3_MOUSE	Hnrnpdl	Heterogeneous nuclear ribonucleoprotein D-like	2.5762	1.36525	4.4775e-06	4.12877e-05
sp|Q8K3F7|TDH_MOUSE	Q8K3F7	TDH_MOUSE	Tdh	L-threonine 3-dehydrogenase, mitochondrial	2.5746	1.36435	4.54404e-06	4.17674e-05
sp|Q6ZPZ3|ZC3H4_MOUSE	Q6ZPZ3	ZC3H4_MOUSE	Zc3h4	Zinc finger CCCH domain-containing protein 4	2.57177	1.36276	4.66451e-06	4.27382e-05
sp|P70349|HINT1_MOUSE	P70349	HINT1_MOUSE	Hint1	Histidine triad nucleotide-binding protein 1	2.56097	1.35669	5.15267e-06	4.70611e-05
sp|Q9DBR1|XRN2_MOUSE	Q9DBR1	XRN2_MOUSE	Xrn2	5'-3' exoribonuclease 2	2.56003	1.35616	5.19755e-06	4.73207e-05
sp|Q3U0V1|FUBP2_MOUSE	Q3U0V1	FUBP2_MOUSE	Khsrp	Far upstream element-binding protein 2	2.55798	1.355	5.29689e-06	4.80731e-05
sp|Q8BIJ6|SYIM_MOUSE	Q8BIJ6	SYIM_MOUSE	Iars2	Isoleucine--tRNA ligase, mitochondrial	2.55104	1.35108	5.64691e-06	5.10885e-05
sp|Q9CPT3|NANP_MOUSE	Q9CPT3	NANP_MOUSE	Nanp	N-acylneuraminate-9-phosphatase	2.55037	1.35071	5.6817e-06	5.12422e-05
sp|Q9QXK7|CPSF3_MOUSE	Q9QXK7	CPSF3_MOUSE	Cpsf3	Cleavage and polyadenylation specificity factor subunit 3	2.54352	1.34683	6.05235e-06	5.44144e-05
sp|Q922Q4|P5CR2_MOUSE	Q922Q4	P5CR2_MOUSE	Pycr2	Pyrroline-5-carboxylate reductase 2	2.54047	1.3451	6.22469e-06	5.57895e-05
sp|Q9JK81|MYG1_MOUSE	Q9JK81	MYG1_MOUSE	Myg1	UPF0160 protein MYG1, mitochondrial	2.53674	1.34297	6.44302e-06	5.75669e-05
sp|Q9DCU6|RM04_MOUSE	Q9DCU6	RM04_MOUSE	Mrpl4	39S ribosomal protein L4, mitochondrial	2.52583	1.33676	7.12506e-06	6.34638e-05
sp|P97360|ETV6_MOUSE	P97360	ETV6_MOUSE	Etv6	Transcription factor ETV6	2.52335	1.33534	7.28977e-06	6.47304e-05
sp|P31266|SUH_MOUSE	P31266	SUH_MOUSE	Rbpj	Recombining binding protein suppressor of hairless	2.51752	1.332	7.69226e-06	6.80943e-05
sp|Q61578|ADRO_MOUSE	Q61578	ADRO_MOUSE	Fdxr	NADPH:adrenodoxin oxidoreductase, mitochondrial	2.50822	1.32666	8.38166e-06	7.39694e-05
sp|Q8CFA2|GCST_MOUSE	Q8CFA2	GCST_MOUSE	Amt	Aminomethyltransferase, mitochondrial	2.50694	1.32593	8.48116e-06	7.46187e-05
sp|Q69Z98|BRSK2_MOUSE	Q69Z98	BRSK2_MOUSE	Brsk2	Serine/threonine-protein kinase BRSK2	2.50437	1.32445	8.68491e-06	7.61783e-05
sp|Q69ZQ2|ISY1_MOUSE	Q69ZQ2	ISY1_MOUSE	Isy1	Pre-mRNA-splicing factor ISY1 homolog	2.49723	1.32033	9.27611e-06	8.11167e-05
sp|Q61136|PRP4B_MOUSE	Q61136	PRP4B_MOUSE	Prpf4b	Serine/threonine-protein kinase PRP4 homolog	2.49127	1.31688	9.79983e-06	8.54367e-05
sp|Q91YP2|NEUL_MOUSE	Q91YP2	NEUL_MOUSE	Nln	Neurolysin, mitochondrial	2.48768	1.3148	1.01299e-05	8.80475e-05
sp|Q62383|SPT6H_MOUSE	Q62383	SPT6H_MOUSE	Supt6h	Transcription elongation factor SPT6	2.48575	1.31368	1.03123e-05	8.93625e-05
sp|Q9CQQ7|AT5F1_MOUSE	Q9CQQ7	AT5F1_MOUSE	Atp5f1	ATP synthase F(0) complex subunit B1, mitochondrial	2.48507	1.31329	1.03774e-05	8.96566e-05
sp|O35658|C1QBP_MOUSE	O35658	C1QBP_MOUSE	C1qbp	Complement component 1 Q subcomponent-binding protein, mitochondrial	2.47881	1.30965	1.09943e-05	9.47021e-05
sp|Q8BJL0|SMAL1_MOUSE	Q8BJL0	SMAL1_MOUSE	Smarcal1	SWI/SNF-related matrix-associated actin-dependent regulator of chromatin subfamily A-like protein 1	2.47192	1.30563	1.17161e-05	0.000100619
sp|Q6P3A8|ODBB_MOUSE	Q6P3A8	ODBB_MOUSE	Bckdhb	2-oxoisovalerate dehydrogenase subunit beta, mitochondrial	2.46859	1.30369	1.20813e-05	0.000103446
sp|Q9EQU5|SET_MOUSE	Q9EQU5	SET_MOUSE	Set	Protein SET	2.46565	1.30197	1.24132e-05	0.000105972
sp|Q9CW46|RAVR1_MOUSE	Q9CW46	RAVR1_MOUSE	Raver1	Ribonucleoprotein PTB-binding 1	2.46246	1.3001	1.27839e-05	0.000108814
sp|Q99PV0|PRP8_MOUSE	Q99PV0	PRP8_MOUSE	Prpf8	Pre-mRNA-processing-splicing factor 8	2.4541	1.29519	1.38095e-05	0.000117197
sp|O08583|THOC4_MOUSE	O08583	THOC4_MOUSE	Alyref	THO complex subunit 4	2.4361	1.28457	1.63045e-05	0.000137965
sp|Q9CQ49|NCBP2_MOUSE	Q9CQ49	NCBP2_MOUSE	Ncbp2	Nuclear cap-binding protein subunit 2	2.43357	1.28308	1.6689e-05	0.000140804
sp|O35218|CPSF2_MOUSE	O35218	CPSF2_MOUSE	Cpsf2	Cleavage and polyadenylation specificity factor subunit 2	2.43239	1.28238	1.68719e-05	0.000141931
sp|Q8C2E4|PTCD1_MOUSE	Q8C2E4	PTCD1_MOUSE	Ptcd1	Pentatricopeptide repeat-containing protein 1, mitochondrial	2.43122	1.28168	1.70546e-05	0.00014305
sp|Q8JZX4|SPF45_MOUSE	Q8JZX4	SPF45_MOUSE	Rbm17	Splicing factor 45	2.42675	1.27903	1.77732e-05	0.000148644
sp|Q02614|S30BP_MOUSE	Q02614	S30BP_MOUSE	Sap30bp	SAP30-binding protein	2.42128	1.27577	1.8694e-05	0.000155891
sp|Q921M3|SF3B3_MOUSE	Q921M3	SF3B3_MOUSE	Sf3b3	Splicing factor 3B subunit 3	2.42032	1.27519	1.88603e-05	0.000156824
sp|Q80TR8|VPRBP_MOUSE	Q80TR8	VPRBP_MOUSE	Vprbp	Protein VPRBP	2.406	1.26663	2.15236e-05	0.000178454
sp|P58064|RT06_MOUSE	P58064	RT06_MOUSE	Mrps6	28S ribosomal protein S6, mitochondrial	2.40093	1.2636	2.25524e-05	0.000186446
sp|O09111|NDUBB_MOUSE	O09111	NDUBB_MOUSE	Ndufb11	NADH dehydrogenase [ubiquinone] 1 beta subcomplex subunit 11, mitochondrial	2.39787	1.26175	2.31992e-05	0.000191244
sp|Q9CY57|CHTOP_MOUSE	Q9CY57	CHTOP_MOUSE	Chtop	Chromatin target of PRMT1 protein	2.38685	1.25511	2.56803e-05	0.000211092
sp|Q8BTV2|CPSF7_MOUSE	Q8BTV2	CPSF7_MOUSE	Cpsf7	Cleavage and polyadenylation specificity factor subunit 7	2.38032	1.25116	2.72737e-05	0.000223551
sp|Q7TSV4|PGM2_MOUSE	Q7TSV4	PGM2_MOUSE	Pgm2	Phosphoglucomutase-2	2.37754	1.24947	2.79832e-05	0.000228715
sp|Q91V81|RBM42_MOUSE	Q91V81	RBM42_MOUSE	Rbm42	RNA-binding protein 42	2.37699	1.24914	2.81233e-05	0.000229209
sp|Q69ZA1|CDK13_MOUSE	Q69ZA1	CDK13_MOUSE	Cdk13	Cyclin-dependent kinase 13	2.36802	1.24368	3.05497e-05	0.000248281
sp|Q8CBY3|LENG8_MOUSE	Q8CBY3	LENG8_MOUSE	Leng8	Leukocyte receptor cluster member 8 homolog	2.36601	1.24246	3.11198e-05	0.000252202
sp|Q8BHX3|BOREA_MOUSE	Q8BHX3	BOREA_MOUSE	Cdca8	Borealin	2.35726	1.23711	3.3735e-05	0.000272628
sp|Q8VDM6|HNRL1_MOUSE	Q8VDM6	HNRL1_MOUSE	Hnrnpul1	Heterogeneous nuclear ribonucleoprotein U-like protein 1	2.35411	1.23518	3.47284e-05	0.00027987
sp|Q3V3R1|C1TM_MOUSE	Q3V3R1	C1TM_MOUSE	Mthfd1l	Monofunctional C1-tetrahydrofolate synthase, mitochondrial	2.35053	1.23299	3.58934e-05	0.00028845
sp|P28658|ATX10_MOUSE	P28658	ATX10_MOUSE	Atxn10	Ataxin-10	2.34302	1.22837	3.84656e-05	0.000308261
sp|Q9Z315|SNUT1_MOUSE	Q9Z315	SNUT1_MOUSE	Sart1	U4/U6.U5 tri-snRNP-associated protein 1	2.34143	1.22739	3.90346e-05	0.000311952
sp|Q9D0E1|HNRPM_MOUSE	Q9D0E1	HNRPM_MOUSE	Hnrnpm	Heterogeneous nuclear ribonucleoprotein M	2.33825	1.22543	4.0193e-05	0.000320319
sp|P56399|UBP5_MOUSE	P56399	UBP5_MOUSE	Usp5	Ubiquitin carboxyl-terminal hydrolase 5	2.33704	1.22468	4.06434e-05	0.000323014
sp|Q8R3F9|STPAP_MOUSE	Q8R3F9	STPAP_MOUSE	Tut1	Speckle targeted PIP5K1A-regulated poly(A) polymerase	2.33131	1.22114	4.28475e-05	0.000339593
sp|P17095|HMGA1_MOUSE	P17095	HMGA1_MOUSE	Hmga1	High mobility group protein HMG-I/HMG-Y	2.32729	1.21865	4.44634e-05	0.000351432
sp|Q91X20|ASH2L_MOUSE	Q91X20	ASH2L_MOUSE	Ash2l	Set1/Ash2 histone methyltransferase complex subunit ASH2	2.32656	1.2182	4.47637e-05	0.000352836
sp|Q9QXG9|TINF2_MOUSE	Q9QXG9	TINF2_MOUSE	Tinf2	TERF1-interacting nuclear factor 2	2.31195	1.20911	5.121e-05	0.000402544
sp|Q8CCF0|PRP31_MOUSE	Q8CCF0	PRP31_MOUSE	Prpf31	U4/U6 small nuclear ribonucleoprotein Prp31	2.31096	1.20849	5.16767e-05	0.000405106
sp|Q811I0|ATPF1_MOUSE	Q811I0	ATPF1_MOUSE	Atpaf1	ATP synthase mitochondrial F1 complex assembly factor 1	2.30967	1.20769	5.2296e-05	0.000408247
sp|Q8VEE4|RFA1_MOUSE	Q8VEE4	RFA1_MOUSE	Rpa1	Replication protein A 70 kDa DNA-binding subunit	2.30953	1.2076	5.23612e-05	0.000408247
sp|P61979-3|HNRPK_MOUSE	P61979-3	HNRPK_MOUSE	Hnrnpk	Isoform 3 of Heterogeneous nuclear ribonucleoprotein K	2.30617	1.2055	5.40094e-05	0.00041996
sp|Q3U186|SYRM_MOUSE	Q3U186	SYRM_MOUSE	Rars2	Probable arginine--tRNA ligase, mitochondrial	2.3023	1.20307	5.59677e-05	0.000434014
sp|Q3UQV5|KBTB8_MOUSE	Q3UQV5	KBTB8_MOUSE	Kbtbd8	Kelch repeat and BTB domain-containing protein 8	2.29657	1.19948	5.89993e-05	0.000456293
sp|Q99M87|DNJA3_MOUSE	Q99M87	DNJA3_MOUSE	Dnaja3	DnaJ homolog subfamily A member 3, mitochondrial	2.29277	1.19709	6.10957e-05	0.000471239
sp|Q8CFQ3|AQR_MOUSE	Q8CFQ3	AQR_MOUSE	Aqr	Intron-binding protein aquarius	2.29233	1.19681	6.13453e-05	0.000471899
sp|Q8BP71|RFOX2_MOUSE	Q8BP71	RFOX2_MOUSE	Rbfox2	RNA binding protein fox-1 homolog 2	2.28953	1.19505	6.29472e-05	0.000482931
sp|A2A4P0|DHX8_MOUSE	A2A4P0	DHX8_MOUSE	Dhx8	ATP-dependent RNA helicase DHX8	2.28534	1.19241	6.54193e-05	0.000500562
sp|Q8CI11|GNL3_MOUSE	Q8CI11	GNL3_MOUSE	Gnl3	Guanine nucleotide-binding protein-like 3	2.24587	1.16728	9.40252e-05	0.000717534
sp|Q60668|HNRPD_MOUSE	Q60668	HNRPD_MOUSE	Hnrnpd	Heterogeneous nuclear ribonucleoprotein D0	2.24365	1.16585	9.59638e-05	0.000730391
sp|Q91W43|GCSP_MOUSE	Q91W43	GCSP_MOUSE	Gldc	Glycine dehydrogenase (decarboxylating), mitochondrial	2.23831	1.16241	0.000100784	0.000765055
sp|Q9DC48|PRP17_MOUSE	Q9DC48	PRP17_MOUSE	Cdc40	Pre-mRNA-processing factor 17	2.23643	1.1612	0.000102538	0.000776324
sp|Q8QZT1|THIL_MOUSE	Q8QZT1	THIL_MOUSE	Acat1	Acetyl-CoA acetyltransferase, mitochondrial	2.23474	1.16011	0.000104142	0.000786393
sp|Q922H2|PDK3_MOUSE	Q922H2	PDK3_MOUSE	Pdk3	[Pyruvate dehydrogenase (acetyl-transferring)] kinase isozyme 3, mitochondrial	2.23328	1.15916	0.000105552	0.000794954
sp|P70270|RAD54_MOUSE	P70270	RAD54_MOUSE	Rad54l	DNA repair and recombination protein RAD54-like	2.22765	1.15552	0.000111144	0.000834889
sp|Q99L13|3HIDH_MOUSE	Q99L13	3HIDH_MOUSE	Hibadh	3-hydroxyisobutyrate dehydrogenase, mitochondrial	2.22229	1.15204	0.000116752	0.00087473
tr|Q0VBL3|Q0VBL3_MOUSE	Q0VBL3	Q0VBL3_MOUSE	Rbm15	Protein Rbm15	2.22189	1.15179	0.000117177	0.000875631
tr|D3Z0M9|D3Z0M9_MOUSE	D3Z0M9	D3Z0M9_MOUSE	Ddx23	MCG18410, isoform CRA_a	2.2088	1.14326	0.000132122	0.000984756
sp|Q689Z5|SBNO1_MOUSE	Q689Z5	SBNO1_MOUSE	Sbno1	Protein strawberry notch homolog 1	2.19401	1.13357	0.00015129	0.00112471
sp|Q8BFP9|PDK1_MOUSE	Q8BFP9	PDK1_MOUSE	Pdk1	[Pyruvate dehydrogenase (acetyl-transferring)] kinase isozyme 1, mitochondrial	2.18765	1.12938	0.000160364	0.00118909
sp|Q3U2A8|SYVM_MOUSE	Q3U2A8	SYVM_MOUSE	Vars2	Valine--tRNA ligase, mitochondrial	2.18556	1.128	0.000163473	0.00120902
sp|Q99KE1|MAOM_MOUSE	Q99KE1	MAOM_MOUSE	Me2	NAD-dependent malic enzyme, mitochondrial	2.18304	1.12634	0.000167286	0.00123405
sp|P51949|MAT1_MOUSE	P51949	MAT1_MOUSE	Mnat1	CDK-activating kinase assembly factor MAT1	2.17641	1.12195	0.000177739	0.00130781
sp|Q61024|ASNS_MOUSE	Q61024	ASNS_MOUSE	Asns	Asparagine synthetase [glutamine-hydrolyzing]	2.16859	1.11676	0.00019092	0.00140121
sp|Q60953|PML_MOUSE	Q60953	PML_MOUSE	Pml	Protein PML	2.16775	1.1162	0.0001924	0.00140849
sp|Q6DID3|SCAF8_MOUSE	Q6DID3	SCAF8_MOUSE	Scaf8	Protein SCAF8	2.16625	1.1152	0.000195046	0.00142423
sp|Q9CR80|FA32A_MOUSE	Q9CR80	FA32A_MOUSE	Fam32a	Protein FAM32A	2.16441	1.11397	0.000198356	0.00144383
sp|Q9CWZ3|RBM8A_MOUSE	Q9CWZ3	RBM8A_MOUSE	Rbm8a	RNA-binding protein 8A	2.1642	1.11384	0.000198734	0.00144383
sp|P19783|COX41_MOUSE	P19783	COX41_MOUSE	Cox4i1	Cytochrome c oxidase subunit 4 isoform 1, mitochondrial	2.16009	1.11109	0.000206349	0.00149538
sp|Q99KS2|NGRN_MOUSE	Q99KS2	NGRN_MOUSE	Ngrn	Neugrin	2.15779	1.10955	0.000210738	0.00152335
sp|Q8BZR9|CQ085_MOUSE	Q8BZR9	CQ085_MOUSE	>sp|Q8BZR9|CQ085_MOUSE	Ncbp3	2.15639	1.10862	0.000213445	0.00153905
sp|Q5RKZ7|MOCS1_MOUSE	Q5RKZ7	MOCS1_MOUSE	Mocs1	Molybdenum cofactor biosynthesis protein 1	2.15486	1.10759	0.000216445	0.00155656
sp|O70126|AURKB_MOUSE	O70126	AURKB_MOUSE	Aurkb	Aurora kinase B	2.1546	1.10742	0.000216955	0.00155656
sp|O54836|ZMAT3_MOUSE	O54836	ZMAT3_MOUSE	Zmat3	Zinc finger matrin-type protein 3	2.14205	1.09899	0.00024331	0.0017413
sp|Q8CH18|CCAR1_MOUSE	Q8CH18	CCAR1_MOUSE	Ccar1	Cell division cycle and apoptosis regulator protein 1	2.13762	1.09601	0.000253333	0.00180854
tr|B2LVG5|B2LVG5_MOUSE	B2LVG5	B2LVG5_MOUSE	Cpsf4	Cleavage and polyadenylation specific factor 4 isoform 1	2.1275	1.08916	0.000277839	0.00197857
sp|Q8BNV1|TRM2A_MOUSE	Q8BNV1	TRM2A_MOUSE	Trmt2a	tRNA (uracil-5-)-methyltransferase homolog A	2.12717	1.08893	0.000278673	0.00197961
sp|P41233|ABCA1_MOUSE	P41233	ABCA1_MOUSE	Abca1	ATP-binding cassette sub-family A member 1	0.387589	-1.3674	0.00028781	0.00203948
sp|Q62318|TIF1B_MOUSE	Q62318	TIF1B_MOUSE	Trim28	Transcription intermediary factor 1-beta	2.12264	1.08586	0.000290413	0.00205287
sp|Q14AX6|CDK12_MOUSE	Q14AX6	CDK12_MOUSE	Cdk12	Cyclin-dependent kinase 12	2.11265	1.07905	0.000318075	0.00224118
sp|Q91WN1|DNJC9_MOUSE	Q91WN1	DNJC9_MOUSE	Dnajc9	DnaJ homolog subfamily C member 9	2.11247	1.07893	0.00031861	0.00224118
sp|Q6ZQJ5|DNA2_MOUSE	Q6ZQJ5	DNA2_MOUSE	Dna2	DNA replication ATP-dependent helicase/nuclease DNA2	2.10836	1.07612	0.000330752	0.00232091
sp|Q80X82|SYMPK_MOUSE	Q80X82	SYMPK_MOUSE	Sympk	Symplekin	2.09865	1.06946	0.000361299	0.0025291
sp|Q9CWW6|PIN4_MOUSE	Q9CWW6	PIN4_MOUSE	Pin4	Peptidyl-prolyl cis-trans isomerase NIMA-interacting 4	2.09766	1.06878	0.000364567	0.00254577
sp|Q8K2Z2|PRP39_MOUSE	Q8K2Z2	PRP39_MOUSE	Prpf39	Pre-mRNA-processing factor 39	2.09448	1.06659	0.000375239	0.00261395
sp|Q501J6|DDX17_MOUSE	Q501J6	DDX17_MOUSE	Ddx17	Probable ATP-dependent RNA helicase DDX17	2.09041	1.06379	0.00038937	0.00270584
sp|Q9WUR2|ECI2_MOUSE	Q9WUR2	ECI2_MOUSE	Eci2	Enoyl-CoA delta isomerase 2, mitochondrial	2.08871	1.06261	0.00039544	0.0027414
sp|Q9CQF3|CPSF5_MOUSE	Q9CQF3	CPSF5_MOUSE	Nudt21	Cleavage and polyadenylation specificity factor subunit 5	2.08413	1.05945	0.000412239	0.00285099
sp|Q3UFB2|BCD1_MOUSE	Q3UFB2	BCD1_MOUSE	Znhit6	Box C/D snoRNA protein 1	2.07728	1.05469	0.000438704	0.00302674
sp|P01867|IGG2B_MOUSE	P01867	IGG2B_MOUSE	Igh-3	Ig gamma-2B chain C region	2.07533	1.05334	0.000446501	0.00307317
sp|Q9D0L7|ARM10_MOUSE	Q9D0L7	ARM10_MOUSE	Armc10	Armadillo repeat-containing protein 10	2.06916	1.04904	0.000472222	0.00324244
sp|Q8R3N6|THOC1_MOUSE	Q8R3N6	THOC1_MOUSE	Thoc1	THO complex subunit 1	2.06835	1.04848	0.000475684	0.00325844
sp|Q8VCN5|CGL_MOUSE	Q8VCN5	CGL_MOUSE	Cth	Cystathionine gamma-lyase	2.06479	1.04599	0.000491304	0.00335744
sp|Q921F4|HNRLL_MOUSE	Q921F4	HNRLL_MOUSE	Hnrnpll	Heterogeneous nuclear ribonucleoprotein L-like	2.06271	1.04454	0.000500661	0.00341327
sp|Q923D4|SF3B5_MOUSE	Q923D4	SF3B5_MOUSE	Sf3b5	Splicing factor 3B subunit 5	2.06172	1.04385	0.000505137	0.00343565
sp|Q9ERS5|PKHA2_MOUSE	Q9ERS5	PKHA2_MOUSE	Plekha2	Pleckstrin homology domain-containing family A member 2	2.06064	1.04309	0.000510131	0.00346143
sp|Q3TYA6|MPP8_MOUSE	Q3TYA6	MPP8_MOUSE	Mphosph8	M-phase phosphoprotein 8	2.05854	1.04162	0.000519906	0.00351946
sp|P20108|PRDX3_MOUSE	P20108	PRDX3_MOUSE	Prdx3	Thioredoxin-dependent peroxide reductase, mitochondrial	2.05678	1.04039	0.000528272	0.0035677
sp|Q60974|NCOR1_MOUSE	Q60974	NCOR1_MOUSE	Ncor1	Nuclear receptor corepressor 1	2.05407	1.03848	0.000541413	0.00364788
sp|Q9CRT8|XPOT_MOUSE	Q9CRT8	XPOT_MOUSE	Xpot	Exportin-T	2.05366	1.0382	0.000543395	0.00365268
sp|Q9EPU4|CPSF1_MOUSE	Q9EPU4	CPSF1_MOUSE	Cpsf1	Cleavage and polyadenylation specificity factor subunit 1	2.05309	1.0378	0.000546213	0.00366306
sp|Q6ZQ03|FNBP4_MOUSE	Q6ZQ03	FNBP4_MOUSE	Fnbp4	Formin-binding protein 4	2.04961	1.03535	0.000563709	0.00376564
sp|Q8K2D6|DCTD_MOUSE	Q8K2D6	DCTD_MOUSE	Dctd	Deoxycytidylate deaminase	2.04953	1.03529	0.000564126	0.00376564
sp|Q9D1I6|RM14_MOUSE	Q9D1I6	RM14_MOUSE	Mrpl14	39S ribosomal protein L14, mitochondrial	2.04283	1.03057	0.000599353	0.00399152
sp|Q9CPQ1|COX6C_MOUSE	Q9CPQ1	COX6C_MOUSE	Cox6c	Cytochrome c oxidase subunit 6C	2.03625	1.02592	0.000636047	0.00422611
tr|Q9EQC8|Q9EQC8_MOUSE	Q9EQC8	Q9EQC8_MOUSE	Prcc	Papillary renal cell carcinoma (Translocation-associated)	2.03396	1.02429	0.000649369	0.00430469
sp|Q8R3G1|PP1R8_MOUSE	Q8R3G1	PP1R8_MOUSE	Ppp1r8	Nuclear inhibitor of protein phosphatase 1	2.0274	1.01963	0.000688982	0.00455679
sp|Q9R0P5|DEST_MOUSE	Q9R0P5	DEST_MOUSE	Dstn	Destrin	2.01059	1.00762	0.000801705	0.00529015
sp|Q91VN6|DDX41_MOUSE	Q91VN6	DDX41_MOUSE	Ddx41	Probable ATP-dependent RNA helicase DDX41	2.00185	1.00133	0.000867346	0.00571019
sp|Q9ERA6|TFP11_MOUSE	Q9ERA6	TFP11_MOUSE	Tfip11	Tuftelin-interacting protein 11	1.99737	0.9981	0.000903017	0.00593146
sp|Q6NZQ4|PAXI1_MOUSE	Q6NZQ4	PAXI1_MOUSE	Paxip1	PAX-interacting protein 1	1.99598	0.997098	0.000914339	0.00599215
sp|Q9CZU3|SK2L2_MOUSE	Q9CZU3	SK2L2_MOUSE	Skiv2l2	Superkiller viralicidic activity 2-like 2	1.99104	0.993519	0.000955891	0.00625022
sp|Q8BHS3|RBM22_MOUSE	Q8BHS3	RBM22_MOUSE	Rbm22	Pre-mRNA-splicing factor RBM22	1.98834	0.991562	0.000979338	0.00638902
tr|Q8K1G9|Q8K1G9_MOUSE	Q8K1G9	Q8K1G9_MOUSE	Dhx35	DEAH (Asp-Glu-Ala-His) box polypeptide 35	1.98149	0.986587	0.0010414	0.00677851
sp|Q8CHY6|P66A_MOUSE	Q8CHY6	P66A_MOUSE	Gatad2a	Transcriptional repressor p66 alpha	1.98097	0.986208	0.00104626	0.00679479
sp|Q60848|HELLS_MOUSE	Q60848	HELLS_MOUSE	Hells	Lymphocyte-specific helicase	1.97781	0.983902	0.00107638	0.00697464
sp|Q91VY9|ZN622_MOUSE	Q91VY9	ZN622_MOUSE	Znf622	Zinc finger protein 622	1.97197	0.979635	0.00113423	0.00733301
sp|Q8K2C6|SIR5_MOUSE	Q8K2C6	SIR5_MOUSE	Sirt5	NAD-dependent protein deacylase sirtuin-5, mitochondrial	1.96997	0.978174	0.00115469	0.00744853
sp|A2ATU0|DHTK1_MOUSE	A2ATU0	DHTK1_MOUSE	Dhtkd1	Probable 2-oxoglutarate dehydrogenase E1 component DHKTD1, mitochondrial	1.96898	0.977451	0.00116493	0.00749779
sp|A2APB8|TPX2_MOUSE	A2APB8	TPX2_MOUSE	Tpx2	Targeting protein for Xklp2	1.9683	0.976948	0.00117212	0.00752723
sp|Q9D1J3|SARNP_MOUSE	Q9D1J3	SARNP_MOUSE	Sarnp	SAP domain-containing ribonucleoprotein	1.96727	0.976193	0.00118297	0.00758
sp|P97807|FUMH_MOUSE	P97807	FUMH_MOUSE	Fh	Fumarate hydratase, mitochondrial	1.96612	0.975354	0.00119515	0.00764099
sp|Q6PAV2|HERC4_MOUSE	Q6PAV2	HERC4_MOUSE	Herc4	Probable E3 ubiquitin-protein ligase HERC4	1.96344	0.973386	0.00122417	0.0078053
sp|P47911|RL6_MOUSE	P47911	RL6_MOUSE	Rpl6	60S ribosomal protein L6	1.96325	0.973244	0.00122628	0.0078053
tr|E9Q7G0|E9Q7G0_MOUSE	E9Q7G0	E9Q7G0_MOUSE	Numa1	Protein Numa1	1.96152	0.971972	0.0012454	0.00790956
sp|Q6PCL9|PAPOG_MOUSE	Q6PCL9	PAPOG_MOUSE	Papolg	Poly(A) polymerase gamma	1.95818	0.969517	0.00128311	0.00813108
sp|O08740|RPB11_MOUSE	O08740	RPB11_MOUSE	Polr2j	DNA-directed RNA polymerase II subunit RPB11	1.95335	0.965949	0.00133979	0.0084716
sp|Q9DCW4|ETFB_MOUSE	Q9DCW4	ETFB_MOUSE	Etfb	Electron transfer flavoprotein subunit beta	1.94239	0.957831	0.00147748	0.00932176
sp|Q9Z2I9|SUCB1_MOUSE	Q9Z2I9	SUCB1_MOUSE	Sucla2	Succinyl-CoA ligase [ADP-forming] subunit beta, mitochondrial	1.93942	0.955625	0.0015171	0.00955073
sp|Q7TSZ8|NACC1_MOUSE	Q7TSZ8	NACC1_MOUSE	Nacc1	Nucleus accumbens-associated protein 1	1.91916	0.940476	0.0018168	0.0114125
sp|Q9QXX8|NUFP1_MOUSE	Q9QXX8	NUFP1_MOUSE	Nufip1	Nuclear fragile X mental retardation-interacting protein 1	1.91745	0.939188	0.00184463	0.0115621
sp|Q9DB20|ATPO_MOUSE	Q9DB20	ATPO_MOUSE	Atp5o	ATP synthase subunit O, mitochondrial	1.91268	0.935596	0.0019244	0.0120115
sp|O70348|DXO_MOUSE	O70348	DXO_MOUSE	Dxo	Decapping and exoribonuclease protein	1.91266	0.935583	0.00192468	0.0120115
sp|Q9DBP5|KCY_MOUSE	Q9DBP5	KCY_MOUSE	Cmpk1	UMP-CMP kinase	1.91155	0.934743	0.0019438	0.0121045
sp|O35286|DHX15_MOUSE	O35286	DHX15_MOUSE	Dhx15	Putative pre-mRNA-splicing factor ATP-dependent RNA helicase DHX15	1.9091	0.932894	0.00198645	0.0123435
sp|Q8R409|HEXI1_MOUSE	Q8R409	HEXI1_MOUSE	Hexim1	Protein HEXIM1	1.9068	0.931156	0.00202736	0.0125705
sp|B2RWS6|EP300_MOUSE	B2RWS6	EP300_MOUSE	Ep300	Histone acetyltransferase p300	1.90255	0.927936	0.00210516	0.0130249
tr|E9Q1Z0|E9Q1Z0_MOUSE	E9Q1Z0	E9Q1Z0_MOUSE	4732456N10Rik	Protein 4732456N10Rik	0.433152	-1.20706	0.00214858	0.013265
sp|P42227|STAT3_MOUSE	P42227	STAT3_MOUSE	Stat3	Signal transducer and activator of transcription 3	1.89858	0.924921	0.00218052	0.0134333
sp|Q80YD1|SUV3_MOUSE	Q80YD1	SUV3_MOUSE	Supv3l1	ATP-dependent RNA helicase SUPV3L1, mitochondrial	1.89825	0.924673	0.00218681	0.0134433
sp|Q9WUM5|SUCA_MOUSE	Q9WUM5	SUCA_MOUSE	Suclg1	Succinyl-CoA ligase [ADP/GDP-forming] subunit alpha, mitochondrial	1.89258	0.920353	0.00229941	0.0141054
sp|Q99LC2|CSTF1_MOUSE	Q99LC2	CSTF1_MOUSE	Cstf1	Cleavage stimulation factor subunit 1	1.88706	0.916137	0.00241439	0.0147791
sp|Q91WM1|STRBP_MOUSE	Q91WM1	STRBP_MOUSE	Strbp	Spermatid perinuclear RNA-binding protein	1.88673	0.915888	0.00242133	0.0147902
sp|Q99PP2|ZN318_MOUSE	Q99PP2	ZN318_MOUSE	Znf318	Zinc finger protein 318 (Fragment)	1.87816	0.909318	0.0026116	0.0159186
sp|Q8K1R3|PNPT1_MOUSE	Q8K1R3	PNPT1_MOUSE	Pnpt1	Polyribonucleotide nucleotidyltransferase 1, mitochondrial	1.8777	0.908964	0.00262223	0.0159412
sp|Q923D5|WBP11_MOUSE	Q923D5	WBP11_MOUSE	Wbp11	WW domain-binding protein 11	1.87752	0.908825	0.0026264	0.0159412
tr|E9Q7L0|E9Q7L0_MOUSE	E9Q7L0	E9Q7L0_MOUSE	Ogdhl	Protein Ogdhl	1.87346	0.905708	0.00272185	0.0164858
sp|Q8R2Q4|RRF2M_MOUSE	Q8R2Q4	RRF2M_MOUSE	Gfm2	Ribosome-releasing factor 2, mitochondrial	1.8723	0.90481	0.00274993	0.0166209
sp|Q8CFI7|RPB2_MOUSE	Q8CFI7	RPB2_MOUSE	Polr2b	DNA-directed RNA polymerase II subunit RPB2	1.86543	0.899507	0.0029213	0.0176197
sp|Q9QZH3|PPIE_MOUSE	Q9QZH3	PPIE_MOUSE	Ppie	Peptidyl-prolyl cis-trans isomerase E	1.8459	0.884327	0.00346719	0.0208657
sp|Q8R326|PSPC1_MOUSE	Q8R326	PSPC1_MOUSE	Pspc1	Paraspeckle component 1	1.84565	0.884131	0.00347484	0.0208657
sp|Q99LI9|CLP1_MOUSE	Q99LI9	CLP1_MOUSE	Clp1	Polyribonucleotide 5'-hydroxyl-kinase Clp1	1.84544	0.883966	0.00348124	0.0208657
sp|O35900|LSM2_MOUSE	O35900	LSM2_MOUSE	Lsm2	U6 snRNA-associated Sm-like protein LSm2	1.83553	0.876196	0.00379652	0.0227081
sp|Q9Z2D0|MTMR9_MOUSE	Q9Z2D0	MTMR9_MOUSE	Mtmr9	Myotubularin-related protein 9	1.83273	0.873993	0.00389049	0.0232219
sp|Q9JIX8|ACINU_MOUSE	Q9JIX8	ACINU_MOUSE	Acin1	Apoptotic chromatin condensation inducer in the nucleus	1.83201	0.873424	0.00391514	0.0233206
sp|O08709|PRDX6_MOUSE	O08709	PRDX6_MOUSE	Prdx6	Peroxiredoxin-6	1.83159	0.873098	0.00392928	0.0233565
sp|P23475|XRCC6_MOUSE	P23475	XRCC6_MOUSE	Xrcc6	X-ray repair cross-complementing protein 6	1.82583	0.868551	0.00413185	0.02451
sp|Q91YM4|TBRG4_MOUSE	Q91YM4	TBRG4_MOUSE	Tbrg4	Protein TBRG4	1.82465	0.867618	0.00417459	0.0247125
sp|Q9D338|RM19_MOUSE	Q9D338	RM19_MOUSE	Mrpl19	39S ribosomal protein L19, mitochondrial	1.81623	0.860951	0.00449178	0.0265356
sp|P61965|WDR5_MOUSE	P61965	WDR5_MOUSE	Wdr5	WD repeat-containing protein 5	1.81384	0.859047	0.0045863	0.0270385
sp|Q9DCX2|ATP5H_MOUSE	Q9DCX2	ATP5H_MOUSE	Atp5h	ATP synthase subunit d, mitochondrial	1.8093	0.855431	0.00477076	0.0280685
sp|O88491|NSD1_MOUSE	O88491	NSD1_MOUSE	Nsd1	Histone-lysine N-methyltransferase, H3 lysine-36 and H4 lysine-20 specific	1.80708	0.853659	0.00486364	0.0285565
sp|Q9CWS4|INT11_MOUSE	Q9CWS4	INT11_MOUSE	Cpsf3l	Integrator complex subunit 11	1.80571	0.85257	0.0049215	0.0288374
sp|Q9WU56|TRUA_MOUSE	Q9WU56	TRUA_MOUSE	Pus1	tRNA pseudouridine synthase A, mitochondrial	1.80458	0.851661	0.00497028	0.029064
sp|Q9D6J6|NDUV2_MOUSE	Q9D6J6	NDUV2_MOUSE	Ndufv2	NADH dehydrogenase [ubiquinone] flavoprotein 2, mitochondrial	1.80125	0.849002	0.00511549	0.0298525
sp|Q8K2V6|IPO11_MOUSE	Q8K2V6	IPO11_MOUSE	Ipo11	Importin-11	1.79881	0.847047	0.00522476	0.0304284
sp|Q8CGY8|OGT1_MOUSE	Q8CGY8	OGT1_MOUSE	Ogt	UDP-N-acetylglucosamine--peptide N-acetylglucosaminyltransferase 110 kDa subunit	1.79119	0.840917	0.00558106	0.0324378
sp|P54071|IDHP_MOUSE	P54071	IDHP_MOUSE	Idh2	Isocitrate dehydrogenase [NADP], mitochondrial	1.79053	0.840386	0.00561291	0.0325015
sp|O70475|UGDH_MOUSE	O70475	UGDH_MOUSE	Ugdh	UDP-glucose 6-dehydrogenase	1.79034	0.840233	0.00562213	0.0325015
sp|P60335|PCBP1_MOUSE	P60335	PCBP1_MOUSE	Pcbp1	Poly(rC)-binding protein 1	1.79026	0.84017	0.00562592	0.0325015
sp|Q8BW10|NOB1_MOUSE	Q8BW10	NOB1_MOUSE	Nob1	RNA-binding protein NOB1	1.78447	0.835499	0.0059141	0.0340319
sp|Q07832|PLK1_MOUSE	Q07832	PLK1_MOUSE	Plk1	Serine/threonine-protein kinase PLK1	1.78447	0.835493	0.00591448	0.0340319
sp|Q8K019|BCLF1_MOUSE	Q8K019	BCLF1_MOUSE	Bclaf1	Bcl-2-associated transcription factor 1	1.78134	0.832959	0.00607635	0.0348935
sp|Q80SW1|SAHH2_MOUSE	Q80SW1	SAHH2_MOUSE	Ahcyl1	Putative adenosylhomocysteinase 2	1.77753	0.829874	0.00627882	0.0359844
sp|Q80YR9|R12BA_MOUSE	Q80YR9	R12BA_MOUSE	Rbm12b1	RNA-binding protein 12B-A	1.77329	0.826431	0.00651197	0.0372464
sp|Q5SVQ0|KAT7_MOUSE	Q5SVQ0	KAT7_MOUSE	Kat7	Histone acetyltransferase KAT7	1.771	0.824567	0.00664143	0.0379115
sp|Q91VR2|ATPG_MOUSE	Q91VR2	ATPG_MOUSE	Atp5c1	ATP synthase subunit gamma, mitochondrial	1.77065	0.824277	0.00666178	0.0379524
sp|P50544|ACADV_MOUSE	P50544	ACADV_MOUSE	Acadvl	Very long-chain specific acyl-CoA dehydrogenase, mitochondrial	1.77019	0.823902	0.00668818	0.0380275
sp|P50247|SAHH_MOUSE	P50247	SAHH_MOUSE	Ahcy	Adenosylhomocysteinase	1.75769	0.813678	0.00744504	0.0422142
sp|P55194|3BP1_MOUSE	P55194	3BP1_MOUSE	Sh3bp1	SH3 domain-binding protein 1	1.75755	0.813565	0.00745388	0.0422142
sp|Q9JIK5|DDX21_MOUSE	Q9JIK5	DDX21_MOUSE	Ddx21	Nucleolar RNA helicase 2	1.75637	0.8126	0.00752921	0.042557
sp|Q62018|CTR9_MOUSE	Q62018	CTR9_MOUSE	Ctr9	RNA polymerase-associated protein CTR9 homolog	1.75529	0.81171	0.00759932	0.0428691
sp|Q91VR5|DDX1_MOUSE	Q91VR5	DDX1_MOUSE	Ddx1	ATP-dependent RNA helicase DDX1	1.75449	0.811052	0.00765157	0.0430794
sp|Q569Z5|DDX46_MOUSE	Q569Z5	DDX46_MOUSE	Ddx46	Probable ATP-dependent RNA helicase DDX46	1.7512	0.808342	0.00786996	0.0442224
sp|Q80UN9|MOD5_MOUSE	Q80UN9	MOD5_MOUSE	Trit1	tRNA dimethylallyltransferase, mitochondrial	1.74994	0.807303	0.0079552	0.0446143
sp|Q8BGT5|ALAT2_MOUSE	Q8BGT5	ALAT2_MOUSE	Gpt2	Alanine aminotransferase 2	1.74473	0.803002	0.00831686	0.0465518
sp|Q61025|IFT20_MOUSE	Q61025	IFT20_MOUSE	Ift20	Intraflagellar transport protein 20 homolog	1.7441	0.80248	0.00836178	0.0466508
sp|Q3V0C5|UBP48_MOUSE	Q3V0C5	UBP48_MOUSE	Usp48	Ubiquitin carboxyl-terminal hydrolase 48	1.74402	0.80242	0.00836699	0.0466508
sp|P13864|DNMT1_MOUSE	P13864	DNMT1_MOUSE	Dnmt1	DNA (cytosine-5)-methyltransferase 1	1.74338	0.801885	0.00841321	0.0468178
sp|Q8R5F3|OARD1_MOUSE	Q8R5F3	OARD1_MOUSE	Oard1	O-acetyl-ADP-ribose deacetylase 1	1.74266	0.801292	0.00846474	0.0470136
sp|P10711|TCEA1_MOUSE	P10711	TCEA1_MOUSE	Tcea1	Transcription elongation factor A protein 1	1.74139	0.800239	0.00855696	0.0474342
sp|Q9Z2Q5|RM40_MOUSE	Q9Z2Q5	RM40_MOUSE	Mrpl40	39S ribosomal protein L40, mitochondrial	1.73983	0.79895	0.00867108	0.0479744
sp|Q8C1A5|THOP1_MOUSE	Q8C1A5	THOP1_MOUSE	Thop1	Thimet oligopeptidase	1.73564	0.795466	0.00898636	0.0496233
sp|Q8BH95|ECHM_MOUSE	Q8BH95	ECHM_MOUSE	Echs1	Enoyl-CoA hydratase, mitochondrial	1.7314	0.791935	0.00931629	0.0513467
sp|Q02053|UBA1_MOUSE	Q02053	UBA1_MOUSE	Uba1	Ubiquitin-like modifier-activating enzyme 1	1.73067	0.791331	0.0093738	0.0515648
tr|B2RT41|B2RT41_MOUSE	B2RT41	B2RT41_MOUSE	Zfc3h1	Protein Zfc3h1	1.73023	0.790965	0.00940882	0.0516587
sp|Q9WVA3|BUB3_MOUSE	Q9WVA3	BUB3_MOUSE	Bub3	Mitotic checkpoint protein BUB3	1.72931	0.790193	0.00948301	0.0519669
sp|Q9CZ44|NSF1C_MOUSE	Q9CZ44	NSF1C_MOUSE	Nsfl1c	NSFL1 cofactor p47	1.72807	0.789158	0.00958333	0.0524168
sp|Q64092|TFE3_MOUSE	Q64092	TFE3_MOUSE	Tfe3	Transcription factor E3	1.72491	0.786519	0.0098435	0.0537377
sp|Q8BQM4|HEAT3_MOUSE	Q8BQM4	HEAT3_MOUSE	Heatr3	HEAT repeat-containing protein 3	1.7229	0.78484	0.0100122	0.0544859
sp|Q9CZD3|SYG_MOUSE	Q9CZD3	SYG_MOUSE	Gars	Glycine--tRNA ligase	1.72283	0.784779	0.0100184	0.0544859
sp|Q64674|SPEE_MOUSE	Q64674	SPEE_MOUSE	Srm	Spermidine synthase	1.72242	0.784439	0.010053	0.0545706
sp|P46718|PDCD2_MOUSE	P46718	PDCD2_MOUSE	Pdcd2	Programmed cell death protein 2	1.72018	0.782558	0.0102458	0.0555125
sp|Q8BFY9|TNPO1_MOUSE	Q8BFY9	TNPO1_MOUSE	Tnpo1	Transportin-1	1.7143	0.777619	0.0107678	0.0582314
sp|Q9Z1P6|NDUA7_MOUSE	Q9Z1P6	NDUA7_MOUSE	Ndufa7	NADH dehydrogenase [ubiquinone] 1 alpha subcomplex subunit 7	1.71253	0.776128	0.0109301	0.0589979
sp|Q80YR5|SAFB2_MOUSE	Q80YR5	SAFB2_MOUSE	Safb2	Scaffold attachment factor B2	1.70704	0.771498	0.0114479	0.0616769
sp|Q6ZQ93|UBP34_MOUSE	Q6ZQ93	UBP34_MOUSE	Usp34	Ubiquitin carboxyl-terminal hydrolase 34	1.70584	0.770482	0.0115643	0.0621879
sp|Q9EQ20|MMSA_MOUSE	Q9EQ20	MMSA_MOUSE	Aldh6a1	Methylmalonate-semialdehyde dehydrogenase [acylating], mitochondrial	1.70504	0.769809	0.0116421	0.0624892
sp|Q9ESK4|ING2_MOUSE	Q9ESK4	ING2_MOUSE	Ing2	Inhibitor of growth protein 2	1.7044	0.769268	0.0117048	0.0627091
sp|Q06985|SIA1B_MOUSE	Q06985	SIA1B_MOUSE	Siah1b	E3 ubiquitin-protein ligase SIAH1B	1.70345	0.768459	0.0117994	0.0630983
sp|Q9JIF0|ANM1_MOUSE	Q9JIF0	ANM1_MOUSE	Prmt1	Protein arginine N-methyltransferase 1	1.6978	0.763665	0.0123735	0.0660456
sp|P18155|MTDC_MOUSE	P18155	MTDC_MOUSE	Mthfd2	Bifunctional methylenetetrahydrofolate dehydrogenase/cyclohydrolase, mitochondrial	1.69739	0.763321	0.0124156	0.0661475
sp|B1AR13|CISD3_MOUSE	B1AR13	CISD3_MOUSE	Cisd3	CDGSH iron-sulfur domain-containing protein 3, mitochondrial	1.69308	0.759652	0.0128729	0.0683995
sp|Q8K385|FRRS1_MOUSE	Q8K385	FRRS1_MOUSE	FRRS1	Ferric-chelate reductase 1	1.69296	0.759551	0.0128858	0.0683995
sp|Q9R0Q4|MO4L2_MOUSE	Q9R0Q4	MO4L2_MOUSE	Morf4l2	Mortality factor 4-like protein 2	1.68387	0.751779	0.0139052	0.0736743
tr|G3X9Z4|G3X9Z4_MOUSE	G3X9Z4	G3X9Z4_MOUSE	Pcf11	Cleavage and polyadenylation factor subunit homolog (S. cerevisiae)	1.68271	0.750788	0.0140402	0.074253
sp|Q9R0L7|AKP8L_MOUSE	Q9R0L7	AKP8L_MOUSE	Akap8l	A-kinase anchor protein 8-like	1.67281	0.742271	0.0152489	0.0804976
sp|Q7TPV4|MBB1A_MOUSE	Q7TPV4	MBB1A_MOUSE	Mybbp1a	Myb-binding protein 1A	1.66408	0.734722	0.0163962	0.0863952
sp|Q6PB66|LPPRC_MOUSE	Q6PB66	LPPRC_MOUSE	Lrpprc	Leucine-rich PPR motif-containing protein, mitochondrial	1.66253	0.733378	0.0166081	0.0873522
tr|E9Q6J6|E9Q6J6_MOUSE	E9Q6J6	E9Q6J6_MOUSE	Psg20	Protein Psg20	1.6597	0.730919	0.0170024	0.0892627
sp|Q9DCT2|NDUS3_MOUSE	Q9DCT2	NDUS3_MOUSE	Ndufs3	NADH dehydrogenase [ubiquinone] iron-sulfur protein 3, mitochondrial	1.65753	0.729034	0.01731	0.0907121
sp|Q8K339|KIN17_MOUSE	Q8K339	KIN17_MOUSE	Kin	DNA/RNA-binding protein KIN17	1.65717	0.728724	0.0173612	0.0908149
sp|Q64433|CH10_MOUSE	Q64433	CH10_MOUSE	Hspe1	10 kDa heat shock protein, mitochondrial	1.65594	0.727647	0.0175396	0.0915817
tr|B7ZNL9|B7ZNL9_MOUSE	B7ZNL9	B7ZNL9_MOUSE	Tatdn2	Protein Tatdn2	1.65505	0.726876	0.0176684	0.0920871
sp|Q8BJ05|ZC3HE_MOUSE	Q8BJ05	ZC3HE_MOUSE	Zc3h14	Zinc finger CCCH domain-containing protein 14	1.65429	0.72621	0.0177803	0.0925023
sp|Q6P9L6|KIF15_MOUSE	Q6P9L6	KIF15_MOUSE	Kif15	Kinesin-like protein KIF15	1.65376	0.725748	0.0178583	0.0927405
sp|Q9DAW6|PRP4_MOUSE	Q9DAW6	PRP4_MOUSE	Prpf4	U4/U6 small nuclear ribonucleoprotein Prp4	1.65133	0.723625	0.0182204	0.0944509
sp|B1AZI6|THOC2_MOUSE	B1AZI6	THOC2_MOUSE	Thoc2	THO complex subunit 2	1.65081	0.723174	0.0182983	0.0946837
tr|D3Z5F7|D3Z5F7_MOUSE	D3Z5F7	D3Z5F7_MOUSE	Gm20521	Protein Gm20521	1.64445	0.717605	0.0192829	0.0995993
sp|Q60854|SPB6_MOUSE	Q60854	SPB6_MOUSE	Serpinb6	Serpin B6	1.63929	0.713071	0.0201183	0.103728
sp|Q8VC19|HEM1_MOUSE	Q8VC19	HEM1_MOUSE	Alas1	5-aminolevulinate synthase, nonspecific, mitochondrial	1.6371	0.711141	0.0204834	0.105422
sp|Q3THK7|GUAA_MOUSE	Q3THK7	GUAA_MOUSE	Gmps	GMP synthase [glutamine-hydrolyzing]	1.63217	0.706788	0.0213284	0.109575
sp|Q9DBM1|GPTC1_MOUSE	Q9DBM1	GPTC1_MOUSE	Gpatch1	G patch domain-containing protein 1	1.63159	0.706283	0.0214285	0.109892
sp|Q9Z179|SHCBP_MOUSE	Q9Z179	SHCBP_MOUSE	Shcbp1	SHC SH2 domain-binding protein 1	1.6256	0.700976	0.0225039	0.115203
tr|E9QAR1|E9QAR1_MOUSE	E9QAR1	E9QAR1_MOUSE	Zfp384	Protein Zfp384	1.62505	0.700485	0.0226057	0.115518
sp|Q9EPU0|RENT1_MOUSE	Q9EPU0	RENT1_MOUSE	Upf1	Regulator of nonsense transcripts 1	1.62244	0.698167	0.023092	0.117794
sp|O88986|KBL_MOUSE	O88986	KBL_MOUSE	Gcat	2-amino-3-ketobutyrate coenzyme A ligase, mitochondrial	1.62116	0.697029	0.0233339	0.118817
sp|Q9DCE5|PK1IP_MOUSE	Q9DCE5	PK1IP_MOUSE	Pak1ip1	p21-activated protein kinase-interacting protein 1	1.6199	0.695906	0.0235749	0.119832
sp|Q6A4J8|UBP7_MOUSE	Q6A4J8	UBP7_MOUSE	Usp7	Ubiquitin carboxyl-terminal hydrolase 7	1.61729	0.693581	0.0240807	0.122187
sp|Q9D6R2|IDH3A_MOUSE	Q9D6R2	IDH3A_MOUSE	Idh3a	Isocitrate dehydrogenase [NAD] subunit alpha, mitochondrial	1.61707	0.693378	0.0241253	0.122198
sp|Q9CRD0|OCAD1_MOUSE	Q9CRD0	OCAD1_MOUSE	Ociad1	OCIA domain-containing protein 1	1.61155	0.688446	0.0252313	0.127575
sp|Q3UVG3|F91A1_MOUSE	Q3UVG3	F91A1_MOUSE	Fam91a1	Protein FAM91A1	0.511879	-0.966125	0.02597	0.13108
sp|Q8R035|ICT1_MOUSE	Q8R035	ICT1_MOUSE	Ict1	Peptidyl-tRNA hydrolase ICT1, mitochondrial	1.60529	0.682834	0.0265431	0.133738
sp|Q8BFR5|EFTU_MOUSE	Q8BFR5	EFTU_MOUSE	Tufm	Elongation factor Tu, mitochondrial	1.60405	0.68172	0.0268105	0.134849
sp|P01863|GCAA_MOUSE	P01863	GCAA_MOUSE	Ighg	Ig gamma-2A chain C region, A allele	1.60296	0.680739	0.0270476	0.135804
sp|Q8BHG9|CGBP1_MOUSE	Q8BHG9	CGBP1_MOUSE	Cggbp1	CGG triplet repeat-binding protein 1	1.59709	0.675445	0.0283599	0.142145
tr|H7BX60|H7BX60_MOUSE	H7BX60	H7BX60_MOUSE	Pot1b	Protein Pot1b	1.59587	0.674342	0.02864	0.1433
sp|O35130|NEP1_MOUSE	O35130	NEP1_MOUSE	Emg1	Ribosomal RNA small subunit methyltransferase NEP1	1.59407	0.672715	0.0290578	0.145138
tr|Q8VHM5|Q8VHM5_MOUSE	Q8VHM5	Q8VHM5_MOUSE	Hnrnpr	Heterogeneous nuclear ribonucleoprotein R	1.59309	0.671827	0.0292879	0.146033
sp|Q9WUK4|RFC2_MOUSE	Q9WUK4	RFC2_MOUSE	Rfc2	Replication factor C subunit 2	1.59177	0.670631	0.0296003	0.147336
sp|P60762|MO4L1_MOUSE	P60762	MO4L1_MOUSE	Morf4l1	Mortality factor 4-like protein 1	1.58966	0.668716	0.0301068	0.149378
sp|Q8CIM8|INT4_MOUSE	Q8CIM8	INT4_MOUSE	Ints4	Integrator complex subunit 4	1.58963	0.668687	0.0301145	0.149378
sp|Q9CQB5|CISD2_MOUSE	Q9CQB5	CISD2_MOUSE	Cisd2	CDGSH iron-sulfur domain-containing protein 2	0.518573	-0.947381	0.0306988	0.152014
sp|Q9CR16|PPID_MOUSE	Q9CR16	PPID_MOUSE	Ppid	Peptidyl-prolyl cis-trans isomerase D	1.58628	0.665647	0.0309336	0.152914
sp|A2A432|CUL4B_MOUSE	A2A432	CUL4B_MOUSE	Cul4b	Cullin-4B	1.58538	0.664826	0.0311583	0.15376
sp|Q8R001|MARE2_MOUSE	Q8R001	MARE2_MOUSE	Mapre2	Microtubule-associated protein RP/EB family member 2	0.520606	-0.941735	0.0322607	0.158928
sp|Q6NZN0|RBM26_MOUSE	Q6NZN0	RBM26_MOUSE	Rbm26	RNA-binding protein 26	1.57928	0.65927	0.0327147	0.160889
sp|Q64311|NTAN1_MOUSE	Q64311	NTAN1_MOUSE	Ntan1	Protein N-terminal asparagine amidohydrolase	1.57795	0.658049	0.0330653	0.162336
sp|Q9D7B6|ACAD8_MOUSE	Q9D7B6	ACAD8_MOUSE	Acad8	Isobutyryl-CoA dehydrogenase, mitochondrial	1.5765	0.656723	0.0334501	0.163699
sp|P62488|RPB7_MOUSE	P62488	RPB7_MOUSE	Polr2g	DNA-directed RNA polymerase II subunit RPB7	1.57647	0.6567	0.0334568	0.163699
sp|Q8BK63|KC1A_MOUSE	Q8BK63	KC1A_MOUSE	Csnk1a1	Casein kinase I isoform alpha	1.57573	0.656021	0.0336551	0.16439
sp|Q5I043|UBP28_MOUSE	Q5I043	UBP28_MOUSE	Usp28	Ubiquitin carboxyl-terminal hydrolase 28	1.57509	0.655436	0.033827	0.164949
sp|Q64127|TIF1A_MOUSE	Q64127	TIF1A_MOUSE	Trim24	Transcription intermediary factor 1-alpha	1.57121	0.651879	0.0348878	0.169835
sp|P23249|MOV10_MOUSE	P23249	MOV10_MOUSE	Mov10	Putative helicase MOV-10	1.5683	0.649204	0.0357041	0.173515
sp|P97310|MCM2_MOUSE	P97310	MCM2_MOUSE	Mcm2	DNA replication licensing factor MCM2	1.56582	0.646916	0.0364153	0.176663
sp|Q925I1|ATAD3_MOUSE	Q925I1	ATAD3_MOUSE	Atad3	ATPase family AAA domain-containing protein 3	1.56561	0.646727	0.0364746	0.176663
sp|Q61687|ATRX_MOUSE	Q61687	ATRX_MOUSE	Atrx	Transcriptional regulator ATRX	1.56188	0.643282	0.0375698	0.181661
sp|Q9Z1X4|ILF3_MOUSE	Q9Z1X4	ILF3_MOUSE	Ilf3	Interleukin enhancer-binding factor 3	1.56003	0.641577	0.038122	0.184022
sp|Q8BG79|C19L2_MOUSE	Q8BG79	C19L2_MOUSE	Cwf19l2	CWF19-like protein 2	1.55822	0.639894	0.0386738	0.186373
sp|P83940|ELOC_MOUSE	P83940	ELOC_MOUSE	Tceb1	Transcription elongation factor B polypeptide 1	1.55698	0.638754	0.0390517	0.187879
sp|O70546|KDM6A_MOUSE	O70546	KDM6A_MOUSE	Kdm6a	Lysine-specific demethylase 6A	1.55595	0.637793	0.0393724	0.189106
sp|Q99KI0|ACON_MOUSE	Q99KI0	ACON_MOUSE	Aco2	Aconitate hydratase, mitochondrial	1.55573	0.637595	0.0394387	0.189109
sp|Q6IFX3|K1C40_MOUSE	Q6IFX3	K1C40_MOUSE	Krt40	Keratin, type I cytoskeletal 40	1.55324	0.635285	0.0402202	0.192535
sp|P49312|ROA1_MOUSE	P49312	ROA1_MOUSE	Hnrnpa1	Heterogeneous nuclear ribonucleoprotein A1	1.55067	0.632892	0.0410435	0.19615
sp|P80316|TCPE_MOUSE	P80316	TCPE_MOUSE	Cct5	T-complex protein 1 subunit epsilon	1.55024	0.63249	0.041183	0.19649
sp|Q8BW72|KDM4A_MOUSE	Q8BW72	KDM4A_MOUSE	Kdm4a	Lysine-specific demethylase 4A	1.54844	0.630814	0.0417697	0.198959
sp|Q60597|ODO1_MOUSE	Q60597	ODO1_MOUSE	Ogdh	2-oxoglutarate dehydrogenase, mitochondrial	1.5457	0.628262	0.0426768	0.202944
sp|Q8C4J7|TBL3_MOUSE	Q8C4J7	TBL3_MOUSE	Tbl3	Transducin beta-like protein 3	1.54491	0.627526	0.0429415	0.203859
sp|Q9DB77|QCR2_MOUSE	Q9DB77	QCR2_MOUSE	Uqcrc2	Cytochrome b-c1 complex subunit 2, mitochondrial	1.54471	0.627334	0.0430108	0.203859
sp|P11031|TCP4_MOUSE	P11031	TCP4_MOUSE	Sub1	Activated RNA polymerase II transcriptional coactivator p15	1.5415	0.624339	0.0441037	0.208695
sp|O88708|ORC4_MOUSE	O88708	ORC4_MOUSE	Orc4	Origin recognition complex subunit 4	1.53512	0.618347	0.0463601	0.219012
sp|Q921S7|RM37_MOUSE	Q921S7	RM37_MOUSE	Mrpl37	39S ribosomal protein L37, mitochondrial	1.53472	0.617979	0.0465017	0.219321
sp|P33609|DPOLA_MOUSE	P33609	DPOLA_MOUSE	Pola1	DNA polymerase alpha catalytic subunit	1.53144	0.614892	0.0477052	0.224628
sp|Q6GSS7|H2A2A_MOUSE	Q6GSS7	H2A2A_MOUSE	Hist2h2aa1	Histone H2A type 2-A	1.53015	0.613675	0.0481867	0.226525
sp|P83917|CBX1_MOUSE	P83917	CBX1_MOUSE	Cbx1	Chromobox protein homolog 1	1.52926	0.612831	0.0485228	0.227732
sp|P19096|FAS_MOUSE	P19096	FAS_MOUSE	Fasn	Fatty acid synthase	1.52593	0.609687	0.0497929	0.233313
sp|Q8K009|AL1L2_MOUSE	Q8K009	AL1L2_MOUSE	Aldh1l2	Mitochondrial 10-formyltetrahydrofolate dehydrogenase	1.52343	0.607325	0.0507649	0.237481
sp|P08775|RPB1_MOUSE	P08775	RPB1_MOUSE	Polr2a	DNA-directed RNA polymerase II subunit RPB1	1.5207	0.604735	0.0518493	0.24216
sp|Q9DB34|CHM2A_MOUSE	Q9DB34	CHM2A_MOUSE	Chmp2a	Charged multivesicular body protein 2a	1.51946	0.603558	0.0523486	0.244096
sp|Q61171|PRDX2_MOUSE	Q61171	PRDX2_MOUSE	Prdx2	Peroxiredoxin-2	1.5187	0.602836	0.0526569	0.244774
sp|O35841|API5_MOUSE	O35841	API5_MOUSE	Api5	Apoptosis inhibitor 5	1.51868	0.602819	0.0526642	0.244774
sp|Q8C3Y4|KNTC1_MOUSE	Q8C3Y4	KNTC1_MOUSE	Kntc1	Kinetochore-associated protein 1	1.51831	0.602462	0.0528171	0.244915
sp|P45481|CBP_MOUSE	P45481	CBP_MOUSE	Crebbp	CREB-binding protein	1.51801	0.602182	0.0529371	0.244915
sp|Q9CQ69|QCR8_MOUSE	Q9CQ69	QCR8_MOUSE	Uqcrq	Cytochrome b-c1 complex subunit 8	1.51798	0.602153	0.0529499	0.244915
sp|P33174|KIF4_MOUSE	P33174	KIF4_MOUSE	Kif4	Chromosome-associated kinesin KIF4	1.51356	0.597946	0.0547842	0.252992
tr|Q91X76|Q91X76_MOUSE	Q91X76	Q91X76_MOUSE	Nt5dc2	5'-nucleotidase domain containing 2	1.51138	0.595867	0.0557099	0.256855
sp|P07742|RIR1_MOUSE	P07742	RIR1_MOUSE	Rrm1	Ribonucleoside-diphosphate reductase large subunit	1.51069	0.595204	0.056008	0.257816
sp|A2AQ19|RTF1_MOUSE	A2AQ19	RTF1_MOUSE	Rtf1	RNA polymerase-associated protein RTF1 homolog	1.5078	0.592443	0.0572631	0.263173
sp|Q9DBA9|TF2H1_MOUSE	Q9DBA9	TF2H1_MOUSE	Gtf2h1	General transcription factor IIH subunit 1	1.50413	0.588931	0.0588934	0.270233
sp|P48972|MYBB_MOUSE	P48972	MYBB_MOUSE	Mybl2	Myb-related protein B	1.50336	0.58819	0.0592422	0.271129
sp|A2BH40|ARI1A_MOUSE	A2BH40	ARI1A_MOUSE	Arid1a	AT-rich interactive domain-containing protein 1A	1.50328	0.588116	0.059277	0.271129
sp|Q8JZM7|CDC73_MOUSE	Q8JZM7	CDC73_MOUSE	Cdc73	Parafibromin	1.50268	0.587537	0.0595507	0.271948
sp|Q8CJG0|AGO2_MOUSE	Q8CJG0	AGO2_MOUSE	Ago2	Protein argonaute-2	1.49851	0.583526	0.0614772	0.280301
sp|Q8BU04|UBR7_MOUSE	Q8BU04	UBR7_MOUSE	Ubr7	Putative E3 ubiquitin-protein ligase UBR7	1.49654	0.581633	0.0624038	0.284076
sp|Q61183|PAPOA_MOUSE	Q61183	PAPOA_MOUSE	Papola	Poly(A) polymerase alpha	1.4947	0.579854	0.0632853	0.287633
sp|Q8C5H8|NAKD2_MOUSE	Q8C5H8	NAKD2_MOUSE	Nadk2	NAD kinase 2, mitochondrial	1.49393	0.579115	0.0636546	0.288855
sp|P04186|CFAB_MOUSE	P04186	CFAB_MOUSE	Cfb	Complement factor B	1.49255	0.577776	0.0643281	0.291452
sp|Q9CWJ9|PUR9_MOUSE	Q9CWJ9	PUR9_MOUSE	Atic	Bifunctional purine biosynthesis protein PURH	1.49106	0.576335	0.0650593	0.294301
sp|Q91W36|UBP3_MOUSE	Q91W36	UBP3_MOUSE	Usp3	Ubiquitin carboxyl-terminal hydrolase 3	1.48769	0.573074	0.0667393	0.301187
sp|Q3UPL0|SC31A_MOUSE	Q3UPL0	SC31A_MOUSE	Sec31a	Protein transport protein Sec31A	1.48759	0.572975	0.0667909	0.301187
sp|Q9D6L8|PPIL3_MOUSE	Q9D6L8	PPIL3_MOUSE	Ppil3	Peptidyl-prolyl cis-trans isomerase-like 3	1.48618	0.571606	0.0675069	0.30394
sp|Q8BFW7|LPP_MOUSE	Q8BFW7	LPP_MOUSE	Lpp	Lipoma-preferred partner homolog	1.48471	0.570183	0.0682583	0.306842
sp|Q8CG47|SMC4_MOUSE	Q8CG47	SMC4_MOUSE	Smc4	Structural maintenance of chromosomes protein 4	1.48378	0.569273	0.068742	0.308521
sp|Q60649|CLPB_MOUSE	Q60649	CLPB_MOUSE	Clpb	Caseinolytic peptidase B protein homolog	1.48358	0.569078	0.0688461	0.308521
sp|Q8C0N2|GPAT3_MOUSE	Q8C0N2	GPAT3_MOUSE	Agpat9	Glycerol-3-phosphate acyltransferase 3	1.48283	0.568358	0.0692318	0.309766
sp|Q6PGH2|HN1L_MOUSE	Q6PGH2	HN1L_MOUSE	Hn1l	Hematological and neurological expressed 1-like protein	1.47835	0.56399	0.0716076	0.319899
sp|Q9CQQ8|LSM7_MOUSE	Q9CQQ8	LSM7_MOUSE	Lsm7	U6 snRNA-associated Sm-like protein LSm7	1.47811	0.563755	0.071737	0.31998
sp|Q9D8W5|PSD12_MOUSE	Q9D8W5	PSD12_MOUSE	Psmd12	26S proteasome non-ATPase regulatory subunit 12	1.47779	0.563439	0.0719117	0.320263
sp|O08528|HXK2_MOUSE	O08528	HXK2_MOUSE	Hk2	Hexokinase-2	1.47685	0.562526	0.0724183	0.322021
sp|P46664|PURA2_MOUSE	P46664	PURA2_MOUSE	Adss	Adenylosuccinate synthetase isozyme 2	1.47623	0.561913	0.0727601	0.323041
sp|Q8VDP4|CCAR2_MOUSE	Q8VDP4	CCAR2_MOUSE	Ccar2	Cell cycle and apoptosis regulator protein 2	1.47595	0.561647	0.0729093	0.323205
sp|Q99J95|CDK9_MOUSE	Q99J95	CDK9_MOUSE	Cdk9	Cyclin-dependent kinase 9	1.47464	0.560363	0.0736305	0.3259
sp|P53810|PIPNA_MOUSE	P53810	PIPNA_MOUSE	Pitpna	Phosphatidylinositol transfer protein alpha isoform	1.47394	0.559683	0.0740151	0.327099
sp|Q9CWV6|PKRI1_MOUSE	Q9CWV6	PKRI1_MOUSE	Prkrip1	PRKR-interacting protein 1	1.4726	0.55837	0.0747616	0.329891
sp|Q8K2M0|RM38_MOUSE	Q8K2M0	RM38_MOUSE	Mrpl38	39S ribosomal protein L38, mitochondrial	1.47219	0.557963	0.0749944	0.330412
sp|P09405|NUCL_MOUSE	P09405	NUCL_MOUSE	Ncl	Nucleolin	1.4714	0.557188	0.075439	0.331863
sp|Q9JL60|GMEB1_MOUSE	Q9JL60	GMEB1_MOUSE	Gmeb1	Glucocorticoid modulatory element-binding protein 1	1.4706	0.556403	0.075892	0.333346
sp|Q9CPP6|NDUA5_MOUSE	Q9CPP6	NDUA5_MOUSE	Ndufa5	NADH dehydrogenase [ubiquinone] 1 alpha subcomplex subunit 5	1.46993	0.555749	0.0762711	0.3345
sp|Q5XJE5|LEO1_MOUSE	Q5XJE5	LEO1_MOUSE	Leo1	RNA polymerase-associated protein LEO1	1.46811	0.553962	0.0773138	0.338557
sp|P17897|LYZ1_MOUSE	P17897	LYZ1_MOUSE	Lyz1	Lysozyme C-1	1.46781	0.553669	0.0774864	0.338797
sp|G5E870|TRIPC_MOUSE	G5E870	TRIPC_MOUSE	Trip12	E3 ubiquitin-protein ligase TRIP12	1.46653	0.552411	0.0782286	0.341523
sp|Q8K2T8|PAF1_MOUSE	Q8K2T8	PAF1_MOUSE	Paf1	RNA polymerase II-associated factor 1 homolog	1.46573	0.551624	0.0786962	0.343044
sp|Q9R1P3|PSB2_MOUSE	Q9R1P3	PSB2_MOUSE	Psmb2	Proteasome subunit beta type-2	1.4648	0.550703	0.0792459	0.344917
sp|Q8BPY9|FIGL1_MOUSE	Q8BPY9	FIGL1_MOUSE	Fignl1	Fidgetin-like protein 1	1.4635	0.549422	0.0800161	0.347744
sp|Q9QYJ0|DNJA2_MOUSE	Q9QYJ0	DNJA2_MOUSE	Dnaja2	DnaJ homolog subfamily A member 2	1.45354	0.539566	0.0861446	0.373813
sp|P58774-2|TPM2_MOUSE	P58774-2	TPM2_MOUSE	Tpm2	Isoform 2 of Tropomyosin beta chain	1.45226	0.538295	0.0869616	0.37679
sp|Q5BKP2|UBP13_MOUSE	Q5BKP2	UBP13_MOUSE	Usp13	Ubiquitin carboxyl-terminal hydrolase 13	1.44972	0.535779	0.0885975	0.383301
tr|F6TQW2|F6TQW2_MOUSE	F6TQW2	F6TQW2_MOUSE	Ighg2c	Protein Ighg2c	1.44764	0.533698	0.0899685	0.388648
sp|Q3TWF6|WDR70_MOUSE	Q3TWF6	WDR70_MOUSE	Wdr70	WD repeat-containing protein 70	1.44639	0.532452	0.0907982	0.391644
sp|Q3TIX9|SNUT2_MOUSE	Q3TIX9	SNUT2_MOUSE	Usp39	U4/U6.U5 tri-snRNP-associated protein 2	1.44593	0.531997	0.0911023	0.392367
sp|P13020|GELS_MOUSE	P13020	GELS_MOUSE	Gsn	Gelsolin	1.44358	0.529651	0.0926844	0.398585
sp|Q6NZF1|ZC11A_MOUSE	Q6NZF1	ZC11A_MOUSE	Zc3h11a	Zinc finger CCCH domain-containing protein 11A	1.44131	0.527377	0.0942389	0.404665
sp|P47754|CAZA2_MOUSE	P47754	CAZA2_MOUSE	Capza2	F-actin-capping protein subunit alpha-2	1.43972	0.525789	0.0953361	0.408766
sp|Q9DB15|RM12_MOUSE	Q9DB15	RM12_MOUSE	Mrpl12	39S ribosomal protein L12, mitochondrial	0.574458	-0.799726	0.100247	0.429182
sp|Q14C51|PTCD3_MOUSE	Q14C51	PTCD3_MOUSE	Ptcd3	Pentatricopeptide repeat domain-containing protein 3, mitochondrial	1.43118	0.517202	0.101448	0.433648
sp|Q9ES46|PARVB_MOUSE	Q9ES46	PARVB_MOUSE	Parvb	Beta-parvin	1.43098	0.517006	0.101592	0.433648
sp|Q80U70|SUZ12_MOUSE	Q80U70	SUZ12_MOUSE	Suz12	Polycomb protein Suz12	1.43059	0.51661	0.101881	0.434238
sp|Q99LP6|GRPE1_MOUSE	Q99LP6	GRPE1_MOUSE	Grpel1	GrpE protein homolog 1, mitochondrial	1.42949	0.515502	0.102694	0.437059
sp|P62754|RS6_MOUSE	P62754	RS6_MOUSE	Rps6	40S ribosomal protein S6	1.42787	0.513865	0.103905	0.441559
sp|Q9JLV6|PNKP_MOUSE	Q9JLV6	PNKP_MOUSE	Pnkp	Bifunctional polynucleotide phosphatase/kinase	1.42425	0.510204	0.106654	0.452572
sp|Q99LF4|RTCB_MOUSE	Q99LF4	RTCB_MOUSE	Rtcb	tRNA-splicing ligase RtcB homolog	1.42198	0.5079	0.108414	0.459361
sp|Q8BLH7|HIRP3_MOUSE	Q8BLH7	HIRP3_MOUSE	Hirip3	HIRA-interacting protein 3	1.42047	0.506367	0.109597	0.46369
sp|A2AKX3|SETX_MOUSE	A2AKX3	SETX_MOUSE	Setx	Probable helicase senataxin	1.41768	0.503535	0.111809	0.47168
sp|P57784|RU2A_MOUSE	P57784	RU2A_MOUSE	Snrpa1	U2 small nuclear ribonucleoprotein A'	1.41768	0.503529	0.111813	0.47168
sp|Q9Z2I0|LETM1_MOUSE	Q9Z2I0	LETM1_MOUSE	Letm1	LETM1 and EF-hand domain-containing protein 1, mitochondrial	1.41632	0.502148	0.112905	0.475589
sp|Q68FL6|SYMC_MOUSE	Q68FL6	SYMC_MOUSE	Mars	Methionine--tRNA ligase, cytoplasmic	1.41554	0.501351	0.113538	0.47755
sp|Q60875|ARHG2_MOUSE	Q60875	ARHG2_MOUSE	Arhgef2	Rho guanine nucleotide exchange factor 2	1.41534	0.501145	0.113702	0.47755
sp|Q9D1P4|CHRD1_MOUSE	Q9D1P4	CHRD1_MOUSE	Chordc1	Cysteine and histidine-rich domain-containing protein 1	0.582143	-0.780554	0.114871	0.481756
sp|Q9WTK5|NFKB2_MOUSE	Q9WTK5	NFKB2_MOUSE	Nfkb2	Nuclear factor NF-kappa-B p100 subunit	1.41259	0.49834	0.115956	0.485598
sp|O70551|SRPK1_MOUSE	O70551	SRPK1_MOUSE	Srpk1	SRSF protein kinase 1	1.41199	0.497731	0.11645	0.486957
sp|P49117|NR2C2_MOUSE	P49117	NR2C2_MOUSE	Nr2c2	Nuclear receptor subfamily 2 group C member 2	1.41161	0.497342	0.116767	0.486971
sp|Q9DC61|MPPA_MOUSE	Q9DC61	MPPA_MOUSE	Pmpca	Mitochondrial-processing peptidase subunit alpha	1.41155	0.497275	0.116821	0.486971
sp|Q9CQ28|DPH6_MOUSE	Q9CQ28	DPH6_MOUSE	Dph6	Diphthine--ammonia ligase	1.41138	0.497104	0.116961	0.486971
sp|Q9D855|QCR7_MOUSE	Q9D855	QCR7_MOUSE	Uqcrb	Cytochrome b-c1 complex subunit 7	1.40972	0.495409	0.118349	0.492036
sp|P97496|SMRC1_MOUSE	P97496	SMRC1_MOUSE	Smarcc1	SWI/SNF complex subunit SMARCC1	1.40586	0.491451	0.121639	0.504695
sp|Q9CY16|RT28_MOUSE	Q9CY16	RT28_MOUSE	Mrps28	28S ribosomal protein S28, mitochondrial	1.40554	0.491123	0.121915	0.504695
sp|P61202|CSN2_MOUSE	P61202	CSN2_MOUSE	Cops2	COP9 signalosome complex subunit 2	1.40553	0.491118	0.12192	0.504695
sp|Q6A026|PDS5A_MOUSE	Q6A026	PDS5A_MOUSE	Pds5a	Sister chromatid cohesion protein PDS5 homolog A	1.4053	0.490873	0.122126	0.504822
sp|Q8CCK0|H2AW_MOUSE	Q8CCK0	H2AW_MOUSE	H2afy2	Core histone macro-H2A.2	1.40262	0.488128	0.124457	0.51372
sp|P97386|DNLI3_MOUSE	P97386	DNLI3_MOUSE	Lig3	DNA ligase 3	1.39782	0.483178	0.128746	0.53066
sp|Q9CXY6|ILF2_MOUSE	Q9CXY6	ILF2_MOUSE	Ilf2	Interleukin enhancer-binding factor 2	1.39626	0.481569	0.130164	0.53574
sp|Q9EQI8|RM46_MOUSE	Q9EQI8	RM46_MOUSE	Mrpl46	39S ribosomal protein L46, mitochondrial	1.39545	0.480729	0.130909	0.538037
sp|O35737|HNRH1_MOUSE	O35737	HNRH1_MOUSE	Hnrnph1	Heterogeneous nuclear ribonucleoprotein H	1.3934	0.47861	0.132803	0.545043
sp|Q8VEJ4|NLE1_MOUSE	Q8VEJ4	NLE1_MOUSE	Nle1	Notchless protein homolog 1	1.39295	0.478139	0.133227	0.546001
sp|Q8BH69|SPS1_MOUSE	Q8BH69	SPS1_MOUSE	Sephs1	Selenide, water dikinase 1	1.3925	0.47768	0.133641	0.546922
sp|Q99K46|UBP11_MOUSE	Q99K46	UBP11_MOUSE	Usp11	Ubiquitin carboxyl-terminal hydrolase 11	1.39205	0.477216	0.13406	0.547858
sp|P49718|MCM5_MOUSE	P49718	MCM5_MOUSE	Mcm5	DNA replication licensing factor MCM5	1.38956	0.47463	0.136417	0.556189
tr|Q8C788|Q8C788_MOUSE	Q8C788	Q8C788_MOUSE	Snx18	Sorting nexin	1.3894	0.474458	0.136575	0.556189
sp|Q9Z1B5|MD2L1_MOUSE	Q9Z1B5	MD2L1_MOUSE	Mad2l1	Mitotic spindle assembly checkpoint protein MAD2A	1.38929	0.474345	0.136679	0.556189
sp|P05784|K1C18_MOUSE	P05784	K1C18_MOUSE	Krt18	Keratin, type I cytoskeletal 18	0.592802	-0.754377	0.137449	0.558532
sp|Q3UFS0|ZY11B_MOUSE	Q3UFS0	ZY11B_MOUSE	Zyg11b	Protein zyg-11 homolog B	1.38742	0.472405	0.138469	0.561885
sp|Q9ESX5|DKC1_MOUSE	Q9ESX5	DKC1_MOUSE	Dkc1	H/ACA ribonucleoprotein complex subunit 4	1.38614	0.471071	0.139712	0.566127
sp|O35654|DPOD2_MOUSE	O35654	DPOD2_MOUSE	Pold2	DNA polymerase delta subunit 2	1.38499	0.469875	0.140832	0.569863
sp|Q8VDP2|CX056_MOUSE	Q8VDP2	CX056_MOUSE	>sp|Q8VDP2|CX056_MOUSE	n/a	1.38361	0.468439	0.142185	0.574533
sp|P07759|SPA3K_MOUSE	P07759	SPA3K_MOUSE	Serpina3k	Serine protease inhibitor A3K	1.38138	0.466111	0.144402	0.582673
sp|P42567|EPS15_MOUSE	P42567	EPS15_MOUSE	Eps15	Epidermal growth factor receptor substrate 15	0.597098	-0.743961	0.147314	0.59359
sp|Q3UFY7|5NT3B_MOUSE	Q3UFY7	5NT3B_MOUSE	Nt5c3b	7-methylguanosine phosphate-specific 5'-nucleotidase	1.37792	0.462492	0.147899	0.594343
sp|P01027|CO3_MOUSE	P01027	CO3_MOUSE	C3	Complement C3	1.3779	0.462476	0.147914	0.594343
sp|Q9CPY7|AMPL_MOUSE	Q9CPY7	AMPL_MOUSE	Lap3	Cytosol aminopeptidase	1.37671	0.461224	0.149139	0.598428
sp|Q61466|SMRD1_MOUSE	Q61466	SMRD1_MOUSE	Smarcd1	SWI/SNF-related matrix-associated actin-dependent regulator of chromatin subfamily D member 1	1.37427	0.458669	0.151661	0.607698
sp|Q6A028|SWP70_MOUSE	Q6A028	SWP70_MOUSE	Swap70	Switch-associated protein 70	1.37355	0.457905	0.152421	0.609896
sp|P60824|CIRBP_MOUSE	P60824	CIRBP_MOUSE	Cirbp	Cold-inducible RNA-binding protein	1.37037	0.454569	0.155774	0.622448
sp|Q91X72|HEMO_MOUSE	Q91X72	HEMO_MOUSE	Hpx	Hemopexin	1.36948	0.453631	0.156727	0.625384
sp|Q61765|K1H1_MOUSE	Q61765	K1H1_MOUSE	Krt31	Keratin, type I cuticular Ha1	1.36603	0.449994	0.160462	0.639402
sp|Q91Z53|GRHPR_MOUSE	Q91Z53	GRHPR_MOUSE	Grhpr	Glyoxylate reductase/hydroxypyruvate reductase	1.36464	0.448516	0.161998	0.644359
sp|Q9ER81|IFG15_MOUSE	Q9ER81	IFG15_MOUSE	Tor1aip2	Torsin-1A-interacting protein 2, isoform IFRG15	1.36449	0.448367	0.162153	0.644359
sp|Q91VM3|WIPI4_MOUSE	Q91VM3	WIPI4_MOUSE	Wdr45	WD repeat domain phosphoinositide-interacting protein 4	1.36276	0.446531	0.164078	0.651106
sp|Q9D8U8|SNX5_MOUSE	Q9D8U8	SNX5_MOUSE	Snx5	Sorting nexin-5	1.36238	0.446131	0.1645	0.651882
sp|Q8BH57|WDR48_MOUSE	Q8BH57	WDR48_MOUSE	Wdr48	WD repeat-containing protein 48	1.36179	0.445507	0.165159	0.653536
sp|Q9D554|SF3A3_MOUSE	Q9D554	SF3A3_MOUSE	Sf3a3	Splicing factor 3A subunit 3	1.3616	0.445306	0.165372	0.653536
sp|Q64524|H2B2E_MOUSE	Q64524	H2B2E_MOUSE	Hist2h2be	Histone H2B type 2-E	0.605433	-0.723962	0.167728	0.661937
sp|Q9CQA5|MED4_MOUSE	Q9CQA5	MED4_MOUSE	Med4	Mediator of RNA polymerase II transcription subunit 4	1.35918	0.442732	0.168114	0.662554
sp|Q8VD04|GRAP1_MOUSE	Q8VD04	GRAP1_MOUSE	Gripap1	GRIP1-associated protein 1	0.606906	-0.720454	0.171511	0.675017
sp|P52431|DPOD1_MOUSE	P52431	DPOD1_MOUSE	Pold1	DNA polymerase delta catalytic subunit	1.35497	0.438262	0.172955	0.679768
sp|P97930|KTHY_MOUSE	P97930	KTHY_MOUSE	Dtymk	Thymidylate kinase	1.35358	0.43678	0.174582	0.68523
sp|Q78PG9|CCD25_MOUSE	Q78PG9	CCD25_MOUSE	Ccdc25	Coiled-coil domain-containing protein 25	1.35196	0.435057	0.176487	0.691763
sp|Q99KN9|EPN4_MOUSE	Q99KN9	EPN4_MOUSE	Clint1	Clathrin interactor 1	1.35117	0.434206	0.177434	0.694205
sp|P27659|RL3_MOUSE	P27659	RL3_MOUSE	Rpl3	60S ribosomal protein L3	1.35103	0.434064	0.177593	0.694205
sp|Q8BY02|NKRF_MOUSE	Q8BY02	NKRF_MOUSE	Nkrf	NF-kappa-B-repressing factor	1.35057	0.433574	0.17814	0.695399
sp|Q61624|ZN148_MOUSE	Q61624	ZN148_MOUSE	Znf148	Zinc finger protein 148	1.34982	0.432764	0.179047	0.697991
sp|Q8BJ37|TYDP1_MOUSE	Q8BJ37	TYDP1_MOUSE	Tdp1	Tyrosyl-DNA phosphodiesterase 1	1.34783	0.430638	0.181444	0.706378
sp|Q60899|ELAV2_MOUSE	Q60899	ELAV2_MOUSE	Elavl2	ELAV-like protein 2	1.34686	0.429604	0.182618	0.709304
sp|Q64516|GLPK_MOUSE	Q64516	GLPK_MOUSE	Gk	Glycerol kinase	0.611146	-0.710411	0.182688	0.709304
sp|Q8BH51|COX14_MOUSE	Q8BH51	COX14_MOUSE	Cox14	Cytochrome c oxidase assembly protein COX14	0.611683	-0.709144	0.184134	0.713954
sp|P25206|MCM3_MOUSE	P25206	MCM3_MOUSE	Mcm3	DNA replication licensing factor MCM3	1.34431	0.426869	0.185749	0.719246
sp|Q60598|SRC8_MOUSE	Q60598	SRC8_MOUSE	Cttn	Src substrate cortactin	1.34359	0.426091	0.186647	0.721697
sp|P50136|ODBA_MOUSE	P50136	ODBA_MOUSE	Bckdha	2-oxoisovalerate dehydrogenase subunit alpha, mitochondrial	1.34332	0.425799	0.186985	0.721697
sp|O35710|NOCT_MOUSE	O35710	NOCT_MOUSE	Ccrn4l	Nocturnin	1.3432	0.42567	0.187134	0.721697
sp|Q8R3K3|PTCD2_MOUSE	Q8R3K3	PTCD2_MOUSE	Ptcd2	Pentatricopeptide repeat-containing protein 2, mitochondrial	1.34189	0.424266	0.188765	0.727012
sp|Q9Z2W0|DNPEP_MOUSE	Q9Z2W0	DNPEP_MOUSE	Dnpep	Aspartyl aminopeptidase	1.34007	0.422307	0.191058	0.734859
sp|Q8R3D1|TBC13_MOUSE	Q8R3D1	TBC13_MOUSE	Tbc1d13	TBC1 domain family member 13	1.33883	0.420977	0.192626	0.739692
sp|P60003|ELOF1_MOUSE	P60003	ELOF1_MOUSE	Elof1	Transcription elongation factor 1 homolog	1.33867	0.420805	0.192829	0.739692
sp|Q91VA6|PDIP2_MOUSE	Q91VA6	PDIP2_MOUSE	Poldip2	Polymerase delta-interacting protein 2	1.33842	0.420526	0.19316	0.739975
sp|Q8BLY2|SYTC2_MOUSE	Q8BLY2	SYTC2_MOUSE	Tarsl2	Probable threonine--tRNA ligase 2, cytoplasmic	0.615623	-0.69988	0.19496	0.745878
sp|P62918|RL8_MOUSE	P62918	RL8_MOUSE	Rpl8	60S ribosomal protein L8	0.616193	-0.698546	0.196555	0.750981
tr|Q61635|Q61635_MOUSE	Q61635	Q61635_MOUSE	Ifi47	GTP-binding protein	0.616614	-0.697559	0.197741	0.754511
sp|Q9D1Q6|ERP44_MOUSE	Q9D1Q6	ERP44_MOUSE	Erp44	Endoplasmic reticulum resident protein 44	0.617061	-0.696515	0.199002	0.758315
sp|Q9WVG6|CARM1_MOUSE	Q9WVG6	CARM1_MOUSE	Carm1	Histone-arginine methyltransferase CARM1	1.33179	0.413363	0.201777	0.767874
sp|Q8CFI0|NED4L_MOUSE	Q8CFI0	NED4L_MOUSE	Nedd4l	E3 ubiquitin-protein ligase NEDD4-like	0.618308	-0.693602	0.202548	0.769791
sp|Q924W5|SMC6_MOUSE	Q924W5	SMC6_MOUSE	Smc6	Structural maintenance of chromosomes protein 6	1.33002	0.411447	0.204127	0.774769
sp|Q9WU63|HEBP2_MOUSE	Q9WU63	HEBP2_MOUSE	Hebp2	Heme-binding protein 2	0.62038	-0.688776	0.208519	0.790396
sp|P59328|WDHD1_MOUSE	P59328	WDHD1_MOUSE	Wdhd1	WD repeat and HMG-box DNA-binding protein 1	1.32515	0.406154	0.210719	0.797681
sp|Q8BYJ6|TBCD4_MOUSE	Q8BYJ6	TBCD4_MOUSE	Tbc1d4	TBC1 domain family member 4	0.621303	-0.686631	0.211213	0.798502
sp|Q6ZWN5|RS9_MOUSE	Q6ZWN5	RS9_MOUSE	Rps9	40S ribosomal protein S9	1.32432	0.405252	0.211857	0.799883
sp|P43274|H14_MOUSE	P43274	H14_MOUSE	Hist1h1e	Histone H1.4	1.32387	0.404758	0.212482	0.801195
sp|Q91VD9|NDUS1_MOUSE	Q91VD9	NDUS1_MOUSE	Ndufs1	NADH-ubiquinone oxidoreductase 75 kDa subunit, mitochondrial	1.3228	0.403597	0.213956	0.805696
sp|Q8BTW8|CK5P1_MOUSE	Q8BTW8	CK5P1_MOUSE	Cdk5rap1	CDK5 regulatory subunit-associated protein 1	1.32233	0.403086	0.214607	0.807091
sp|Q8R4X3|RBM12_MOUSE	Q8R4X3	RBM12_MOUSE	Rbm12	RNA-binding protein 12	1.32176	0.402455	0.215413	0.809063
sp|Q8C1D8|IWS1_MOUSE	Q8C1D8	IWS1_MOUSE	Iws1	Protein IWS1 homolog	1.32119	0.401836	0.216205	0.810981
sp|P18052|PTPRA_MOUSE	P18052	PTPRA_MOUSE	Ptpra	Receptor-type tyrosine-protein phosphatase alpha	1.32026	0.400827	0.2175	0.814777
sp|Q922L6|NELFD_MOUSE	Q922L6	NELFD_MOUSE	Nelfcd	Negative elongation factor D	1.3184	0.398794	0.220129	0.823071
sp|Q8R0W0|EPIPL_MOUSE	Q8R0W0	EPIPL_MOUSE	Eppk1	Epiplakin	1.31812	0.398476	0.220541	0.823071
sp|Q9WTX6|CUL1_MOUSE	Q9WTX6	CUL1_MOUSE	Cul1	Cullin-1	1.31809	0.398452	0.220573	0.823071
sp|Q60631|GRB2_MOUSE	Q60631	GRB2_MOUSE	Grb2	Growth factor receptor-bound protein 2	1.31758	0.397892	0.2213	0.824716
sp|Q7TT37|ELP1_MOUSE	Q7TT37	ELP1_MOUSE	Ikbkap	Elongator complex protein 1	1.3152	0.395278	0.224723	0.836387
sp|Q00623|APOA1_MOUSE	Q00623	APOA1_MOUSE	Apoa1	Apolipoprotein A-I	1.31388	0.393829	0.226636	0.841675
sp|Q9D1Q1|MPH6_MOUSE	Q9D1Q1	MPH6_MOUSE	Mphosph6	M-phase phosphoprotein 6	1.31381	0.393759	0.226728	0.841675
sp|Q9JMH6|TRXR1_MOUSE	Q9JMH6	TRXR1_MOUSE	Txnrd1	Thioredoxin reductase 1, cytoplasmic	1.31332	0.393221	0.227442	0.842829
sp|P59326|YTHD1_MOUSE	P59326	YTHD1_MOUSE	Ythdf1	YTH domain-containing family protein 1	1.3132	0.393083	0.227625	0.842829
sp|Q9D051|ODPB_MOUSE	Q9D051	ODPB_MOUSE	Pdhb	Pyruvate dehydrogenase E1 component subunit beta, mitochondrial	1.30679	0.386026	0.237125	0.876315
sp|Q3UXZ9|KDM5A_MOUSE	Q3UXZ9	KDM5A_MOUSE	Kdm5a	Lysine-specific demethylase 5A	1.30669	0.385914	0.237278	0.876315
sp|Q9CXK8|NIP7_MOUSE	Q9CXK8	NIP7_MOUSE	Nip7	60S ribosome subunit biogenesis protein NIP7 homolog	0.630197	-0.666126	0.238177	0.878019
sp|Q99N89|RM43_MOUSE	Q99N89	RM43_MOUSE	Mrpl43	39S ribosomal protein L43, mitochondrial	1.30598	0.38513	0.23835	0.878019
sp|P70296|PEBP1_MOUSE	P70296	PEBP1_MOUSE	Pebp1	Phosphatidylethanolamine-binding protein 1	1.30364	0.382545	0.241907	0.889984
sp|Q99J36|THUM1_MOUSE	Q99J36	THUM1_MOUSE	Thumpd1	THUMP domain-containing protein 1	1.30322	0.382079	0.242552	0.891216
sp|Q921H9|SELR1_MOUSE	Q921H9	SELR1_MOUSE	Coa7	Cytochrome c oxidase assembly factor 7	0.632659	-0.660501	0.245959	0.902582
sp|P61406|EST1A_MOUSE	P61406	EST1A_MOUSE	Smg6	Telomerase-binding protein EST1A	1.29792	0.376204	0.250784	0.919116
sp|Q99M74|KRT82_MOUSE	Q99M74	KRT82_MOUSE	Krt82	Keratin, type II cuticular Hb2	1.29746	0.375695	0.251505	0.920586
sp|Q9D4H1|EXOC2_MOUSE	Q9D4H1	EXOC2_MOUSE	Exoc2	Exocyst complex component 2	1.29675	0.374901	0.252634	0.923542
sp|P62814|VATB2_MOUSE	P62814	VATB2_MOUSE	Atp6v1b2	V-type proton ATPase subunit B, brain isoform	1.29636	0.374462	0.253259	0.924654
sp|Q80ZW0|STK35_MOUSE	Q80ZW0	STK35_MOUSE	Stk35	Serine/threonine-protein kinase 35	1.29348	0.371255	0.257857	0.940248
sp|P62855|RS26_MOUSE	P62855	RS26_MOUSE	Rps26	40S ribosomal protein S26	0.636463	-0.651851	0.258252	0.940494
sp|O70325|GPX41_MOUSE	O70325	GPX41_MOUSE	Gpx4	Phospholipid hydroperoxide glutathione peroxidase, mitochondrial	1.29282	0.370517	0.258924	0.941749
sp|Q8R3V5|SHLB2_MOUSE	Q8R3V5	SHLB2_MOUSE	Sh3glb2	Endophilin-B2	1.29188	0.369471	0.260439	0.945482
sp|Q9Z321|TOP3B_MOUSE	Q9Z321	TOP3B_MOUSE	Top3b	DNA topoisomerase 3-beta-1	1.29178	0.369356	0.260607	0.945482
sp|Q1HFZ0|NSUN2_MOUSE	Q1HFZ0	NSUN2_MOUSE	Nsun2	tRNA (cytosine(34)-C(5))-methyltransferase	1.29142	0.368955	0.261189	0.9464
sp|Q9WUR9|KAD4_MOUSE	Q9WUR9	KAD4_MOUSE	Ak4	Adenylate kinase 4, mitochondrial	1.29019	0.367582	0.263192	0.952457
tr|E9PWG6|E9PWG6_MOUSE	E9PWG6	E9PWG6_MOUSE	Ncapg	Protein Ncapg	1.28991	0.36727	0.263647	0.952906
sp|Q4KWH5|PLCH1_MOUSE	Q4KWH5	PLCH1_MOUSE	Plch1	1-phosphatidylinositol 4,5-bisphosphate phosphodiesterase eta-1	0.638426	-0.647408	0.264719	0.95558
sp|Q8N7N5|DCAF8_MOUSE	Q8N7N5	DCAF8_MOUSE	Dcaf8	DDB1- and CUL4-associated factor 8	1.28672	0.363699	0.268907	0.96948
sp|P01837|IGKC_MOUSE	P01837	IGKC_MOUSE	>sp|P01837|IGKC_MOUSE	n/a	1.28634	0.363273	0.269538	0.970541
tr|Q91VA7|Q91VA7_MOUSE	Q91VA7	Q91VA7_MOUSE	Idh3b	Isocitrate dehydrogenase 3 (NAD+) beta	1.2853	0.362102	0.271281	0.975594
sp|P56546|CTBP2_MOUSE	P56546	CTBP2_MOUSE	Ctbp2	C-terminal-binding protein 2	1.28438	0.361071	0.27282	0.979904
sp|Q8VCH7|RDH10_MOUSE	Q8VCH7	RDH10_MOUSE	Rdh10	Retinol dehydrogenase 10	0.641136	-0.641297	0.273783	0.982135
sp|Q8R1X6|SPG20_MOUSE	Q8R1X6	SPG20_MOUSE	Spg20	Spartin	1.28335	0.359912	0.274557	0.983687
sp|P11679|K2C8_MOUSE	P11679	K2C8_MOUSE	Krt8	Keratin, type II cytoskeletal 8	0.64166	-0.64012	0.275551	0.98583
tr|Q99N15|Q99N15_MOUSE	Q99N15	Q99N15_MOUSE	Hsd17b10	17beta-hydroxysteroid dehydrogenase type 10/short chain L-3-hydroxyacyl-CoA dehydrogenase	1.28259	0.359059	0.27584	0.98583
sp|O70318|E41L2_MOUSE	O70318	E41L2_MOUSE	Epb41l2	Band 4.1-like protein 2	0.642064	-0.639212	0.27692	0.986993
sp|Q9D868-2|PPIH_MOUSE	Q9D868-2	PPIH_MOUSE	Ppih	Isoform 2 of Peptidyl-prolyl cis-trans isomerase H	1.2819	0.358279	0.277017	0.986993
sp|Q9CWV1|MCM8_MOUSE	Q9CWV1	MCM8_MOUSE	Mcm8	DNA helicase MCM8	1.28165	0.357997	0.277442	0.986993
sp|Q9CQE3|RT17_MOUSE	Q9CQE3	RT17_MOUSE	Mrps17	28S ribosomal protein S17, mitochondrial	0.642246	-0.638803	0.277538	0.986993
sp|Q922J3|CLIP1_MOUSE	Q922J3	CLIP1_MOUSE	Clip1	CAP-Gly domain-containing linker protein 1	0.642493	-0.638248	0.278377	0.988754
sp|Q8BX09|RBBP5_MOUSE	Q8BX09	RBBP5_MOUSE	Rbbp5	Retinoblastoma-binding protein 5	1.27973	0.355835	0.280723	0.995858
sp|Q60680|IKKA_MOUSE	Q60680	IKKA_MOUSE	Chuk	Inhibitor of nuclear factor kappa-B kinase subunit alpha	0.643671	-0.635606	0.282399	1
sp|Q9Z1N5|DX39B_MOUSE	Q9Z1N5	DX39B_MOUSE	Ddx39b	Spliceosome RNA helicase Ddx39b	1.27816	0.35407	0.283419	1
sp|Q9Z0H7|BCL10_MOUSE	Q9Z0H7	BCL10_MOUSE	Bcl10	B-cell lymphoma/leukemia 10	1.277	0.352753	0.285442	1
sp|B7ZMP1|XPP3_MOUSE	B7ZMP1	XPP3_MOUSE	Xpnpep3	Probable Xaa-Pro aminopeptidase 3	1.27461	0.350055	0.289612	1
sp|P97765|WBP2_MOUSE	P97765	WBP2_MOUSE	Wbp2	WW domain-binding protein 2	1.27191	0.346998	0.294384	1
sp|Q9CPR5|RM15_MOUSE	Q9CPR5	RM15_MOUSE	Mrpl15	39S ribosomal protein L15, mitochondrial	1.27022	0.34508	0.297403	1
sp|Q8CG46|SMC5_MOUSE	Q8CG46	SMC5_MOUSE	Smc5	Structural maintenance of chromosomes protein 5	1.27001	0.344845	0.297774	1
sp|P62313|LSM6_MOUSE	P62313	LSM6_MOUSE	Lsm6	U6 snRNA-associated Sm-like protein LSm6	1.26897	0.343659	0.299652	1
sp|Q8K297|GT251_MOUSE	Q8K297	GT251_MOUSE	Colgalt1	Procollagen galactosyltransferase 1	1.26732	0.341777	0.302644	1
sp|Q7JJ13|BRD2_MOUSE	Q7JJ13	BRD2_MOUSE	Brd2	Bromodomain-containing protein 2	1.26605	0.340339	0.304943	1
sp|Q8K409|DPOLB_MOUSE	Q8K409	DPOLB_MOUSE	Polb	DNA polymerase beta	1.26594	0.340209	0.305152	1
sp|P58044|IDI1_MOUSE	P58044	IDI1_MOUSE	Idi1	Isopentenyl-diphosphate Delta-isomerase 1	1.26568	0.339912	0.305628	1
sp|Q8CIW5|PEO1_MOUSE	Q8CIW5	PEO1_MOUSE	Peo1	Twinkle protein, mitochondrial	1.26506	0.33921	0.306757	1
sp|Q8K2Z4|CND1_MOUSE	Q8K2Z4	CND1_MOUSE	Ncapd2	Condensin complex subunit 1	1.26502	0.339156	0.306844	1
sp|Q8K2B3|DHSA_MOUSE	Q8K2B3	DHSA_MOUSE	Sdha	Succinate dehydrogenase [ubiquinone] flavoprotein subunit, mitochondrial	1.26476	0.338862	0.307317	1
sp|P39749|FEN1_MOUSE	P39749	FEN1_MOUSE	Fen1	Flap endonuclease 1	1.26384	0.337811	0.309013	1
sp|P17742|PPIA_MOUSE	P17742	PPIA_MOUSE	Ppia	Peptidyl-prolyl cis-trans isomerase A	1.26293	0.336775	0.310688	1
sp|P54728|RD23B_MOUSE	P54728	RD23B_MOUSE	Rad23b	UV excision repair protein RAD23 homolog B	1.26231	0.336069	0.311834	1
sp|Q8VBV7|CSN8_MOUSE	Q8VBV7	CSN8_MOUSE	Cops8	COP9 signalosome complex subunit 8	1.26166	0.335326	0.313043	1
sp|Q9CQ06|RM24_MOUSE	Q9CQ06	RM24_MOUSE	Mrpl24	39S ribosomal protein L24, mitochondrial	1.26151	0.33515	0.313329	1
tr|E9Q9B7|E9Q9B7_MOUSE	E9Q9B7	E9Q9B7_MOUSE	Kidins220	Protein Kidins220	0.652567	-0.615802	0.313682	1
sp|P17809|GTR1_MOUSE	P17809	GTR1_MOUSE	Slc2a1	Solute carrier family 2, facilitated glucose transporter member 1	1.26089	0.33444	0.314488	1
sp|Q9D0F4|NKAP_MOUSE	Q9D0F4	NKAP_MOUSE	Nkap	NF-kappa-B-activating protein	1.26077	0.334303	0.31471	1
sp|Q9D8X2|CC124_MOUSE	Q9D8X2	CC124_MOUSE	Ccdc124	Coiled-coil domain-containing protein 124	0.652863	-0.615149	0.314749	1
sp|Q3B7Z2|OSBP1_MOUSE	Q3B7Z2	OSBP1_MOUSE	Osbp	Oxysterol-binding protein 1	0.653073	-0.614683	0.31551	1
sp|Q8R5M8|CADM1_MOUSE	Q8R5M8	CADM1_MOUSE	Cadm1	Cell adhesion molecule 1	0.6531	-0.614624	0.315606	1
sp|Q3TKT4|SMCA4_MOUSE	Q3TKT4	SMCA4_MOUSE	Smarca4	Transcription activator BRG1	1.25962	0.332992	0.316856	1
sp|P38647|GRP75_MOUSE	P38647	GRP75_MOUSE	Hspa9	Stress-70 protein, mitochondrial	1.25937	0.332701	0.317333	1
sp|Q9D0N7|CAF1B_MOUSE	Q9D0N7	CAF1B_MOUSE	Chaf1b	Chromatin assembly factor 1 subunit B	1.25906	0.332346	0.317916	1
tr|E9PYH6|E9PYH6_MOUSE	E9PYH6	E9PYH6_MOUSE	Setd1a	Protein Setd1a	1.25828	0.331455	0.319383	1
tr|E9QAB6|E9QAB6_MOUSE	E9QAB6	E9QAB6_MOUSE	Ptar1	Protein Ptar1	1.25793	0.331049	0.320052	1
sp|P16332|MUTA_MOUSE	P16332	MUTA_MOUSE	Mut	Methylmalonyl-CoA mutase, mitochondrial	1.25762	0.330694	0.320639	1
tr|F6ZFU0|F6ZFU0_MOUSE	F6ZFU0	F6ZFU0_MOUSE	Eef1d	Elongation factor 1-delta (Fragment)	1.2575	0.330563	0.320855	1
sp|Q9DB91|MED29_MOUSE	Q9DB91	MED29_MOUSE	Med29	Mediator of RNA polymerase II transcription subunit 29	1.25735	0.330385	0.321149	1
sp|Q60520|SIN3A_MOUSE	Q60520	SIN3A_MOUSE	Sin3a	Paired amphipathic helix protein Sin3a	1.25632	0.329208	0.323098	1
tr|E9Q614|E9Q614_MOUSE	E9Q614	E9Q614_MOUSE	Chd3	Protein Chd3	0.655542	-0.609241	0.324487	1
sp|Q9CZH3|PSMG3_MOUSE	Q9CZH3	PSMG3_MOUSE	Psmg3	Proteasome assembly chaperone 3	1.25518	0.327899	0.325274	1
sp|Q8K114|INT9_MOUSE	Q8K114	INT9_MOUSE	Ints9	Integrator complex subunit 9	1.25459	0.327212	0.326418	1
sp|Q07076|ANXA7_MOUSE	Q07076	ANXA7_MOUSE	Anxa7	Annexin A7	1.25432	0.326902	0.326937	1
sp|P11440|CDK1_MOUSE	P11440	CDK1_MOUSE	Cdk1	Cyclin-dependent kinase 1	1.25272	0.325062	0.330018	1
sp|Q99MJ9|DDX50_MOUSE	Q99MJ9	DDX50_MOUSE	Ddx50	ATP-dependent RNA helicase DDX50	1.25255	0.324871	0.330339	1
tr|E9Q2H1|E9Q2H1_MOUSE	E9Q2H1	E9Q2H1_MOUSE	Ubr5	E3 ubiquitin-protein ligase UBR5	1.25243	0.324731	0.330574	1
sp|Q9JHS4|CLPX_MOUSE	Q9JHS4	CLPX_MOUSE	Clpx	ATP-dependent Clp protease ATP-binding subunit clpX-like, mitochondrial	1.25044	0.322437	0.334444	1
sp|Q61194|P3C2A_MOUSE	Q61194	P3C2A_MOUSE	Pik3c2a	Phosphatidylinositol 4-phosphate 3-kinase C2 domain-containing subunit alpha	0.659198	-0.601216	0.337992	1
sp|P97470|PP4C_MOUSE	P97470	PP4C_MOUSE	Ppp4c	Serine/threonine-protein phosphatase 4 catalytic subunit	1.24825	0.319902	0.33875	1
sp|Q62384|ZPR1_MOUSE	Q62384	ZPR1_MOUSE	Zpr1	Zinc finger protein ZPR1	1.24785	0.319448	0.339525	1
sp|Q8R3C0|MCMBP_MOUSE	Q8R3C0	MCMBP_MOUSE	Mcmbp	Mini-chromosome maintenance complex-binding protein	1.24755	0.319096	0.340126	1
sp|Q62148|AL1A2_MOUSE	Q62148	AL1A2_MOUSE	Aldh1a2	Retinal dehydrogenase 2	1.2474	0.318928	0.340412	1
sp|Q64378|FKBP5_MOUSE	Q64378	FKBP5_MOUSE	Fkbp5	Peptidyl-prolyl cis-trans isomerase FKBP5	1.24707	0.318546	0.341066	1
sp|Q9CQ65|MTAP_MOUSE	Q9CQ65	MTAP_MOUSE	Mtap	S-methyl-5'-thioadenosine phosphorylase	1.24705	0.318516	0.341118	1
sp|Q8JZY2|COMDA_MOUSE	Q8JZY2	COMDA_MOUSE	Commd10	COMM domain-containing protein 10	1.24699	0.318446	0.341237	1
sp|Q9CY66|GAR1_MOUSE	Q9CY66	GAR1_MOUSE	Gar1	H/ACA ribonucleoprotein complex subunit 1	1.24657	0.317968	0.342057	1
sp|Q64704|STX3_MOUSE	Q64704	STX3_MOUSE	Stx3	Syntaxin-3	0.660444	-0.598492	0.342648	1
sp|Q99JR8|SMRD2_MOUSE	Q99JR8	SMRD2_MOUSE	Smarcd2	SWI/SNF-related matrix-associated actin-dependent regulator of chromatin subfamily D member 2	1.24481	0.315929	0.345561	1
sp|Q2YDW2|MSTO1_MOUSE	Q2YDW2	MSTO1_MOUSE	Msto1	Protein misato homolog 1	1.24442	0.315476	0.346343	1
sp|Q6PCM2|INT6_MOUSE	Q6PCM2	INT6_MOUSE	Ints6	Integrator complex subunit 6	1.24312	0.31397	0.348948	1
sp|P39447|ZO1_MOUSE	P39447	ZO1_MOUSE	Tjp1	Tight junction protein ZO-1	1.24225	0.312954	0.350711	1
sp|Q8BTZ7|GMPPB_MOUSE	Q8BTZ7	GMPPB_MOUSE	Gmppb	Mannose-1-phosphate guanyltransferase beta	0.662639	-0.593706	0.350915	1
sp|Q9D2X5|SCC4_MOUSE	Q9D2X5	SCC4_MOUSE	Mau2	MAU2 chromatid cohesion factor homolog	1.2415	0.312081	0.352231	1
tr|Q6NZQ2|Q6NZQ2_MOUSE	Q6NZQ2	Q6NZQ2_MOUSE	Ddx31	DEAD/H (Asp-Glu-Ala-Asp/His) box polypeptide 31	0.663216	-0.59245	0.353103	1
sp|Q99LG4|TTC5_MOUSE	Q99LG4	TTC5_MOUSE	Ttc5	Tetratricopeptide repeat protein 5	1.24029	0.310681	0.354676	1
sp|Q9DAT5|MTU1_MOUSE	Q9DAT5	MTU1_MOUSE	Trmu	Mitochondrial tRNA-specific 2-thiouridylase 1	1.23913	0.309327	0.357049	1
sp|P62915|TF2B_MOUSE	P62915	TF2B_MOUSE	Gtf2b	Transcription initiation factor IIB	1.23866	0.308786	0.357999	1
sp|Q8CI33|C19L1_MOUSE	Q8CI33	C19L1_MOUSE	Cwf19l1	CWF19-like protein 1	1.23851	0.308605	0.358317	1
sp|P62264|RS14_MOUSE	P62264	RS14_MOUSE	Rps14	40S ribosomal protein S14	0.664667	-0.589296	0.35863	1
sp|Q9JJZ4|UB2J1_MOUSE	Q9JJZ4	UB2J1_MOUSE	Ube2j1	Ubiquitin-conjugating enzyme E2 J1	0.664728	-0.589163	0.358863	1
sp|Q61112|CAB45_MOUSE	Q61112	CAB45_MOUSE	Sdf4	45 kDa calcium-binding protein	0.664996	-0.588582	0.359889	1
sp|Q8CFI2|UB2R1_MOUSE	Q8CFI2	UB2R1_MOUSE	Cdc34	Ubiquitin-conjugating enzyme E2 R1	1.23761	0.307559	0.36016	1
sp|Q61838|A2M_MOUSE	Q61838	A2M_MOUSE	A2m	Alpha-2-macroglobulin	1.23725	0.307137	0.360905	1
tr|D3YYY8|D3YYY8_MOUSE	D3YYY8	D3YYY8_MOUSE	Arhgef26	Protein Arhgef26	1.23684	0.306654	0.361758	1
sp|P35601|RFC1_MOUSE	P35601	RFC1_MOUSE	Rfc1	Replication factor C subunit 1	1.23656	0.30633	0.36233	1
sp|Q3U1J4|DDB1_MOUSE	Q3U1J4	DDB1_MOUSE	Ddb1	DNA damage-binding protein 1	1.23607	0.305761	0.363338	1
sp|P48722|HS74L_MOUSE	P48722	HS74L_MOUSE	Hspa4l	Heat shock 70 kDa protein 4L	1.23588	0.30554	0.36373	1
sp|P26516|PSMD7_MOUSE	P26516	PSMD7_MOUSE	Psmd7	26S proteasome non-ATPase regulatory subunit 7	0.666152	-0.586077	0.364319	1
sp|Q9DCD0|6PGD_MOUSE	Q9DCD0	6PGD_MOUSE	Pgd	6-phosphogluconate dehydrogenase, decarboxylating	1.23514	0.304671	0.365273	1
sp|Q9WV03|FA50A_MOUSE	Q9WV03	FA50A_MOUSE	Fam50a	Protein FAM50A	1.23476	0.304227	0.366063	1
tr|Q9CZN7|Q9CZN7_MOUSE	Q9CZN7	Q9CZN7_MOUSE	Shmt2	Serine hydroxymethyltransferase	1.23445	0.303869	0.3667	1
sp|A3KG59|P20D2_MOUSE	A3KG59	P20D2_MOUSE	Pm20d2	Peptidase M20 domain-containing protein 2	0.667017	-0.584204	0.367652	1
sp|Q6PGG6|GNL3L_MOUSE	Q6PGG6	GNL3L_MOUSE	Gnl3l	Guanine nucleotide-binding protein-like 3-like protein	0.667101	-0.584024	0.367974	1
sp|P62137|PP1A_MOUSE	P62137	PP1A_MOUSE	Ppp1ca	Serine/threonine-protein phosphatase PP1-alpha catalytic subunit	1.23343	0.302674	0.368832	1
sp|Q9ESJ0|XPO4_MOUSE	Q9ESJ0	XPO4_MOUSE	Xpo4	Exportin-4	1.2324	0.301471	0.370985	1
sp|Q8BHJ5|TBL1R_MOUSE	Q8BHJ5	TBL1R_MOUSE	Tbl1xr1	F-box-like/WD repeat-containing protein TBL1XR1	1.2323	0.301351	0.371199	1
sp|Q8C0C0|ZHX2_MOUSE	Q8C0C0	ZHX2_MOUSE	Zhx2	Zinc fingers and homeoboxes protein 2	0.668118	-0.581825	0.371908	1
sp|Q3UA37|QRIC1_MOUSE	Q3UA37	QRIC1_MOUSE	Qrich1	Glutamine-rich protein 1	1.23145	0.300357	0.372984	1
sp|Q60610|TIAM1_MOUSE	Q60610	TIAM1_MOUSE	Tiam1	T-lymphoma invasion and metastasis-inducing protein 1	1.23057	0.299328	0.374836	1
sp|Q8R0F6|ILKAP_MOUSE	Q8R0F6	ILKAP_MOUSE	Ilkap	Integrin-linked kinase-associated serine/threonine phosphatase 2C	1.23012	0.2988	0.375789	1
sp|Q8BR63|F177A_MOUSE	Q8BR63	F177A_MOUSE	Fam177a1	Protein FAM177A1	0.669134	-0.579633	0.375853	1
sp|Q9DCV7|K2C7_MOUSE	Q9DCV7	K2C7_MOUSE	Krt7	Keratin, type II cytoskeletal 7	0.669652	-0.578517	0.377871	1
sp|Q6TEK5|VKORL_MOUSE	Q6TEK5	VKORL_MOUSE	Vkorc1l1	Vitamin K epoxide reductase complex subunit 1-like protein 1	1.22904	0.297526	0.378091	1
sp|Q9Z1S5|SEPT3_MOUSE	Q9Z1S5	SEPT3_MOUSE	42250	Neuronal-specific septin-3	0.67003	-0.577703	0.379344	1
sp|Q7TPD0|INT3_MOUSE	Q7TPD0	INT3_MOUSE	Ints3	Integrator complex subunit 3	1.22748	0.295697	0.38141	1
sp|Q5DTM8|BRE1A_MOUSE	Q5DTM8	BRE1A_MOUSE	Rnf20	E3 ubiquitin-protein ligase BRE1A	1.22733	0.295527	0.381719	1
sp|P26645|MARCS_MOUSE	P26645	MARCS_MOUSE	Marcks	Myristoylated alanine-rich C-kinase substrate	0.671052	-0.575503	0.383344	1
sp|Q9DB90|SMG9_MOUSE	Q9DB90	SMG9_MOUSE	Smg9	Protein SMG9	1.22595	0.293895	0.384694	1
sp|Q99JX4|EIF3M_MOUSE	Q99JX4	EIF3M_MOUSE	Eif3m	Eukaryotic translation initiation factor 3 subunit M	0.671723	-0.574062	0.385978	1
sp|P17183|ENOG_MOUSE	P17183	ENOG_MOUSE	Eno2	Gamma-enolase	0.671796	-0.573905	0.386265	1
sp|O08795|GLU2B_MOUSE	O08795	GLU2B_MOUSE	Prkcsh	Glucosidase 2 subunit beta	0.672232	-0.572969	0.38798	1
sp|Q9WUK2|IF4H_MOUSE	Q9WUK2	IF4H_MOUSE	Eif4h	Eukaryotic translation initiation factor 4H	1.22406	0.291674	0.388761	1
sp|Q9DBV3|DHX34_MOUSE	Q9DBV3	DHX34_MOUSE	Dhx34	Probable ATP-dependent RNA helicase DHX34	1.22363	0.29117	0.389688	1
sp|P84075|HPCA_MOUSE	P84075	HPCA_MOUSE	Hpca	Neuron-specific calcium-binding protein hippocalcin	1.22317	0.290626	0.390689	1
sp|Q91WC1|POTE1_MOUSE	Q91WC1	POTE1_MOUSE	Pot1	Protection of telomeres protein 1	1.22289	0.290297	0.391296	1
sp|Q9R1X4|TIM_MOUSE	Q9R1X4	TIM_MOUSE	Timeless	Protein timeless homolog	1.22266	0.29002	0.391806	1
sp|Q9EQS3|MYCBP_MOUSE	Q9EQS3	MYCBP_MOUSE	Mycbp	C-Myc-binding protein	0.673287	-0.570707	0.39214	1
sp|Q60737|CSK21_MOUSE	Q60737	CSK21_MOUSE	Csnk2a1	Casein kinase II subunit alpha	1.22161	0.288783	0.394089	1
sp|P59997|KDM2A_MOUSE	P59997	KDM2A_MOUSE	Kdm2a	Lysine-specific demethylase 2A	1.22087	0.287906	0.395712	1
sp|P49586|PCY1A_MOUSE	P49586	PCY1A_MOUSE	Pcyt1a	Choline-phosphate cytidylyltransferase A	1.22043	0.287386	0.396677	1
sp|Q9ESU6|BRD4_MOUSE	Q9ESU6	BRD4_MOUSE	Brd4	Bromodomain-containing protein 4	1.21904	0.285747	0.399723	1
sp|Q8CJG1|AGO1_MOUSE	Q8CJG1	AGO1_MOUSE	Ago1	Protein argonaute-1	1.21903	0.28573	0.399755	1
sp|P05480|SRC_MOUSE	P05480	SRC_MOUSE	Src	Neuronal proto-oncogene tyrosine-protein kinase Src	1.21808	0.284607	0.401849	1
sp|Q9QUR6|PPCE_MOUSE	Q9QUR6	PPCE_MOUSE	Prep	Prolyl endopeptidase	1.21781	0.284294	0.402435	1
sp|Q7TPC1|CDSN_MOUSE	Q7TPC1	CDSN_MOUSE	Cdsn	Corneodesmosin	0.676207	-0.564463	0.403743	1
sp|Q7TMK9|HNRPQ_MOUSE	Q7TMK9	HNRPQ_MOUSE	Syncrip	Heterogeneous nuclear ribonucleoprotein Q	1.21671	0.282991	0.404873	1
sp|Q9CXT8|MPPB_MOUSE	Q9CXT8	MPPB_MOUSE	Pmpcb	Mitochondrial-processing peptidase subunit beta	1.21624	0.282431	0.405924	1
sp|Q8BGV8|MID51_MOUSE	Q8BGV8	MID51_MOUSE	Mief1	Mitochondrial dynamics protein MID51	1.2159	0.282028	0.406679	1
sp|Q8BRK8|AAPK2_MOUSE	Q8BRK8	AAPK2_MOUSE	Prkaa2	5'-AMP-activated protein kinase catalytic subunit alpha-2	1.21557	0.28163	0.407427	1
sp|Q8BKE6|CP20A_MOUSE	Q8BKE6	CP20A_MOUSE	Cyp20a1	Cytochrome P450 20A1	0.677234	-0.562274	0.407851	1
sp|Q3UZ39|LRRF1_MOUSE	Q3UZ39	LRRF1_MOUSE	Lrrfip1	Leucine-rich repeat flightless-interacting protein 1	1.21494	0.280884	0.40883	1
sp|P08228|SODC_MOUSE	P08228	SODC_MOUSE	Sod1	Superoxide dismutase [Cu-Zn]	1.21369	0.279395	0.411639	1
tr|E9PWW9|E9PWW9_MOUSE	E9PWW9	E9PWW9_MOUSE	Rsf1	Protein Rsf1	0.67828	-0.560047	0.412049	1
sp|Q8R0A0|T2FB_MOUSE	Q8R0A0	T2FB_MOUSE	Gtf2f2	General transcription factor IIF subunit 2	1.21334	0.278984	0.412417	1
sp|Q5SYD0|MYO1D_MOUSE	Q5SYD0	MYO1D_MOUSE	Myo1d	Unconventional myosin-Id	0.678598	-0.55937	0.41333	1
sp|Q5RJI5|BRSK1_MOUSE	Q5RJI5	BRSK1_MOUSE	Brsk1	Serine/threonine-protein kinase BRSK1	0.678711	-0.559131	0.413784	1
sp|Q64521|GPDM_MOUSE	Q64521	GPDM_MOUSE	Gpd2	Glycerol-3-phosphate dehydrogenase, mitochondrial	1.2121	0.27751	0.415209	1
sp|Q6PDG5|SMRC2_MOUSE	Q6PDG5	SMRC2_MOUSE	Smarcc2	SWI/SNF complex subunit SMARCC2	1.21199	0.27738	0.415456	1
sp|Q03173|ENAH_MOUSE	Q03173	ENAH_MOUSE	Enah	Protein enabled homolog	0.679211	-0.558067	0.4158	1
sp|Q8CE90|MP2K7_MOUSE	Q8CE90	MP2K7_MOUSE	Map2k7	Dual specificity mitogen-activated protein kinase kinase 7	1.21003	0.27504	0.419908	1
sp|Q9JLZ3|AUHM_MOUSE	Q9JLZ3	AUHM_MOUSE	Auh	Methylglutaconyl-CoA hydratase, mitochondrial	1.2099	0.274887	0.420198	1
sp|P14426|HA13_MOUSE	P14426	HA13_MOUSE	H2-D1	H-2 class I histocompatibility antigen, D-K alpha chain	0.680333	-0.555688	0.420329	1
sp|P60122|RUVB1_MOUSE	P60122	RUVB1_MOUSE	Ruvbl1	RuvB-like 1	1.20872	0.273479	0.422889	1
sp|Q9D1G1|RAB1B_MOUSE	Q9D1G1	RAB1B_MOUSE	Rab1b	Ras-related protein Rab-1B	0.680971	-0.554334	0.422915	1
sp|P83882|RL36A_MOUSE	P83882	RL36A_MOUSE	Rpl36a	60S ribosomal protein L36a	0.681062	-0.554141	0.423285	1
sp|P17156|HSP72_MOUSE	P17156	HSP72_MOUSE	Hspa2	Heat shock-related 70 kDa protein 2	1.20805	0.272685	0.42441	1
sp|P09411|PGK1_MOUSE	P09411	PGK1_MOUSE	Pgk1	Phosphoglycerate kinase 1	1.20725	0.27172	0.426262	1
sp|P14576|SRP54_MOUSE	P14576	SRP54_MOUSE	Srp54	Signal recognition particle 54 kDa protein	0.682097	-0.551952	0.427485	1
sp|P12382|K6PL_MOUSE	P12382	K6PL_MOUSE	Pfkl	ATP-dependent 6-phosphofructokinase, liver type	1.20647	0.270793	0.428043	1
sp|Q60932|VDAC1_MOUSE	Q60932	VDAC1_MOUSE	Vdac1	Voltage-dependent anion-selective channel protein 1	0.682559	-0.550975	0.429366	1
sp|Q9D024|CCD47_MOUSE	Q9D024	CCD47_MOUSE	Ccdc47	Coiled-coil domain-containing protein 47	0.682598	-0.550892	0.429527	1
sp|P48453|PP2BB_MOUSE	P48453	PP2BB_MOUSE	Ppp3cb	Serine/threonine-protein phosphatase 2B catalytic subunit beta isoform	1.2057	0.269876	0.42981	1
sp|P56581|TDG_MOUSE	P56581	TDG_MOUSE	Tdg	G/T mismatch-specific thymine DNA glycosylase	1.20565	0.269813	0.429931	1
sp|Q9D1K2|VATF_MOUSE	Q9D1K2	VATF_MOUSE	Atp6v1f	V-type proton ATPase subunit F	1.20395	0.26778	0.43386	1
sp|Q8BTY1|KAT1_MOUSE	Q8BTY1	KAT1_MOUSE	Ccbl1	Kynurenine--oxoglutarate transaminase 1	1.2038	0.267595	0.434219	1
sp|O08807|PRDX4_MOUSE	O08807	PRDX4_MOUSE	Prdx4	Peroxiredoxin-4	0.68391	-0.548121	0.434883	1
sp|Q6P4S8|INT1_MOUSE	Q6P4S8	INT1_MOUSE	Ints1	Integrator complex subunit 1	1.20334	0.267047	0.43528	1
sp|Q9D2R0|AACS_MOUSE	Q9D2R0	AACS_MOUSE	Aacs	Acetoacetyl-CoA synthetase	1.20282	0.266425	0.436487	1
sp|Q922S8|KIF2C_MOUSE	Q922S8	KIF2C_MOUSE	Kif2c	Kinesin-like protein KIF2C	1.20173	0.265114	0.439035	1
sp|Q9DAW9|CNN3_MOUSE	Q9DAW9	CNN3_MOUSE	Cnn3	Calponin-3	1.20173	0.26511	0.439042	1
sp|P61290|PSME3_MOUSE	P61290	PSME3_MOUSE	Psme3	Proteasome activator complex subunit 3	1.2006	0.263758	0.441678	1
sp|Q99N96|RM01_MOUSE	Q99N96	RM01_MOUSE	Mrpl1	39S ribosomal protein L1, mitochondrial	1.19975	0.262736	0.443674	1
sp|Q9DBY8|NVL_MOUSE	Q9DBY8	NVL_MOUSE	Nvl	Nuclear valosin-containing protein-like	1.19935	0.262256	0.444614	1
sp|Q04750|TOP1_MOUSE	Q04750	TOP1_MOUSE	Top1	DNA topoisomerase 1	1.19812	0.260771	0.447524	1
sp|Q920Q6|MSI2H_MOUSE	Q920Q6	MSI2H_MOUSE	Msi2	RNA-binding protein Musashi homolog 2	1.19733	0.25982	0.449394	1
sp|Q6NZB0|DNJC8_MOUSE	Q6NZB0	DNJC8_MOUSE	Dnajc8	DnaJ homolog subfamily C member 8	1.19603	0.258252	0.45248	1
sp|Q3UMY5|EMAL4_MOUSE	Q3UMY5	EMAL4_MOUSE	Eml4	Echinoderm microtubule-associated protein-like 4	0.688247	-0.539002	0.452717	1
sp|Q9CQE7|ERGI3_MOUSE	Q9CQE7	ERGI3_MOUSE	Ergic3	Endoplasmic reticulum-Golgi intermediate compartment protein 3	0.688281	-0.538931	0.452856	1
sp|P62852|RS25_MOUSE	P62852	RS25_MOUSE	Rps25	40S ribosomal protein S25	0.688445	-0.538587	0.453534	1
tr|D3YWT1|D3YWT1_MOUSE	D3YWT1	D3YWT1_MOUSE	Hnrnph3	MCG11326, isoform CRA_b	0.689277	-0.536843	0.456982	1
sp|P50171|DHB8_MOUSE	P50171	DHB8_MOUSE	Hsd17b8	Estradiol 17-beta-dehydrogenase 8	1.19365	0.255383	0.458153	1
sp|Q3TLH4|PRC2C_MOUSE	Q3TLH4	PRC2C_MOUSE	Prrc2c	Protein PRRC2C	0.689562	-0.536247	0.458163	1
sp|Q9Z0X1|AIFM1_MOUSE	Q9Z0X1	AIFM1_MOUSE	Aifm1	Apoptosis-inducing factor 1, mitochondrial	1.19363	0.255355	0.458209	1
sp|Q61990|PCBP2_MOUSE	Q61990	PCBP2_MOUSE	Pcbp2	Poly(rC)-binding protein 2	1.19328	0.254928	0.459056	1
tr|E9Q6H8|E9Q6H8_MOUSE	E9Q6H8	E9Q6H8_MOUSE	Plekha5	Protein Plekha5	0.689973	-0.535389	0.459867	1
sp|O54825|BYST_MOUSE	O54825	BYST_MOUSE	Bysl	Bystin	1.19218	0.253601	0.461693	1
sp|P62082|RS7_MOUSE	P62082	RS7_MOUSE	Rps7	40S ribosomal protein S7	0.690765	-0.533734	0.463158	1
sp|Q9D3W4|GPN3_MOUSE	Q9D3W4	GPN3_MOUSE	Gpn3	GPN-loop GTPase 3	1.19154	0.252833	0.463222	1
sp|Q9EQJ9|MAGI3_MOUSE	Q9EQJ9	MAGI3_MOUSE	Magi3	Membrane-associated guanylate kinase, WW and PDZ domain-containing protein 3	0.690999	-0.533245	0.464132	1
sp|Q8VCQ3|NRBF2_MOUSE	Q8VCQ3	NRBF2_MOUSE	Nrbf2	Nuclear receptor-binding factor 2	1.18908	0.249845	0.469187	1
sp|Q8BGT6|MILK1_MOUSE	Q8BGT6	MILK1_MOUSE	Micall1	MICAL-like protein 1	0.6929	-0.529281	0.472059	1
sp|Q8BSK8|KS6B1_MOUSE	Q8BSK8	KS6B1_MOUSE	Rps6kb1	Ribosomal protein S6 kinase beta-1	1.18701	0.247327	0.474238	1
sp|O55022|PGRC1_MOUSE	O55022	PGRC1_MOUSE	Pgrmc1	Membrane-associated progesterone receptor component 1	0.693426	-0.528187	0.474257	1
sp|Q8VE92|RBM4B_MOUSE	Q8VE92	RBM4B_MOUSE	Rbm4b	RNA-binding protein 4B	1.18668	0.246927	0.475042	1
sp|P62843|RS15_MOUSE	P62843	RS15_MOUSE	Rps15	40S ribosomal protein S15	0.693641	-0.527739	0.475158	1
sp|Q8BGH2|SAM50_MOUSE	Q8BGH2	SAM50_MOUSE	Samm50	Sorting and assembly machinery component 50 homolog	1.18615	0.24629	0.476325	1
sp|P55271|CDN2B_MOUSE	P55271	CDN2B_MOUSE	Cdkn2b	Cyclin-dependent kinase 4 inhibitor B	0.694042	-0.526904	0.476838	1
tr|E9PVZ8|E9PVZ8_MOUSE	E9PVZ8	E9PVZ8_MOUSE	Golgb1	Protein Golgb1	0.694658	-0.525625	0.479419	1
sp|Q60930|VDAC2_MOUSE	Q60930	VDAC2_MOUSE	Vdac2	Voltage-dependent anion-selective channel protein 2	0.69551	-0.523856	0.482995	1
sp|P24270|CATA_MOUSE	P24270	CATA_MOUSE	Cat	Catalase	0.695574	-0.523725	0.48326	1
sp|Q9WTP7|KAD3_MOUSE	Q9WTP7	KAD3_MOUSE	Ak3	GTP:AMP phosphotransferase AK3, mitochondrial	1.18295	0.242387	0.48421	1
sp|Q9D483|RPC3_MOUSE	Q9D483	RPC3_MOUSE	Polr3c	DNA-directed RNA polymerase III subunit RPC3	1.18288	0.242305	0.484377	1
sp|Q9CY27|TECR_MOUSE	Q9CY27	TECR_MOUSE	Tecr	Very-long-chain enoyl-CoA reductase	0.695843	-0.523166	0.484392	1
sp|Q9Z110|P5CS_MOUSE	Q9Z110	P5CS_MOUSE	Aldh18a1	Delta-1-pyrroline-5-carboxylate synthase	1.18245	0.241779	0.485443	1
sp|O54734|OST48_MOUSE	O54734	OST48_MOUSE	Ddost	Dolichyl-diphosphooligosaccharide--protein glycosyltransferase 48 kDa subunit	1.18112	0.240159	0.488732	1
sp|Q6ZQ88|KDM1A_MOUSE	Q6ZQ88	KDM1A_MOUSE	Kdm1a	Lysine-specific histone demethylase 1A	1.1807	0.239646	0.489778	1
tr|G3UYU0|G3UYU0_MOUSE	G3UYU0	G3UYU0_MOUSE	Mex3a	Protein Mex3a	1.18017	0.238989	0.491115	1
sp|Q99PP7|TRI33_MOUSE	Q99PP7	TRI33_MOUSE	Trim33	E3 ubiquitin-protein ligase TRIM33	1.18003	0.238829	0.491441	1
sp|Q9CPU0|LGUL_MOUSE	Q9CPU0	LGUL_MOUSE	Glo1	Lactoylglutathione lyase	0.697898	-0.518913	0.493041	1
sp|P70398|USP9X_MOUSE	P70398	USP9X_MOUSE	Usp9x	Probable ubiquitin carboxyl-terminal hydrolase FAF-X	1.17939	0.238037	0.493055	1
sp|Q5SSW2|PSME4_MOUSE	Q5SSW2	PSME4_MOUSE	Psme4	Proteasome activator complex subunit 4	1.17938	0.23803	0.49307	1
sp|Q5RJG1|NOL10_MOUSE	Q5RJG1	NOL10_MOUSE	Nol10	Nucleolar protein 10	0.698003	-0.518696	0.493484	1
sp|Q8CI32|BAG5_MOUSE	Q8CI32	BAG5_MOUSE	Bag5	BAG family molecular chaperone regulator 5	0.698045	-0.518609	0.493662	1
sp|Q9CPR8|MAGG1_MOUSE	Q9CPR8	MAGG1_MOUSE	Ndnl2	Melanoma-associated antigen G1	1.17876	0.237271	0.494618	1
sp|Q8BI84|MIA3_MOUSE	Q8BI84	MIA3_MOUSE	Mia3	Melanoma inhibitory activity protein 3	0.698347	-0.517984	0.494938	1
sp|Q6ZQH8|NU188_MOUSE	Q6ZQH8	NU188_MOUSE	Nup188	Nucleoporin NUP188 homolog	1.17855	0.237017	0.495138	1
sp|Q6PIJ4|NFRKB_MOUSE	Q6PIJ4	NFRKB_MOUSE	Nfrkb	Nuclear factor related to kappa-B-binding protein	1.17852	0.236973	0.495227	1
tr|Q9ER67|Q9ER67_MOUSE	Q9ER67	Q9ER67_MOUSE	Maged2	Maged2 protein	0.698587	-0.517489	0.495948	1
sp|P14148|RL7_MOUSE	P14148	RL7_MOUSE	Rpl7	60S ribosomal protein L7	1.17788	0.236199	0.49681	1
sp|Q8VBT9|ASPC1_MOUSE	Q8VBT9	ASPC1_MOUSE	Aspscr1	Tether containing UBX domain for GLUT4	1.17696	0.235065	0.499131	1
sp|Q60596|XRCC1_MOUSE	Q60596	XRCC1_MOUSE	Xrcc1	DNA repair protein XRCC1	1.17674	0.23479	0.499695	1
sp|P52293|IMA1_MOUSE	P52293	IMA1_MOUSE	Kpna2	Importin subunit alpha-1	1.17655	0.234563	0.50016	1
sp|Q9DB25|ALG5_MOUSE	Q9DB25	ALG5_MOUSE	Alg5	Dolichyl-phosphate beta-glucosyltransferase	1.17588	0.233741	0.501847	1
sp|Q8VDM4|PSMD2_MOUSE	Q8VDM4	PSMD2_MOUSE	Psmd2	26S proteasome non-ATPase regulatory subunit 2	0.700055	-0.51446	0.502155	1
sp|Q3UHJ0|AAK1_MOUSE	Q3UHJ0	AAK1_MOUSE	Aak1	AP2-associated protein kinase 1	1.17538	0.233127	0.503107	1
sp|P08556|RASN_MOUSE	P08556	RASN_MOUSE	Nras	GTPase NRas	0.700684	-0.513164	0.504818	1
sp|Q3UV17|K22O_MOUSE	Q3UV17	K22O_MOUSE	Krt76	Keratin, type II cytoskeletal 2 oral	0.70109	-0.512328	0.50654	1
sp|P63158|HMGB1_MOUSE	P63158	HMGB1_MOUSE	Hmgb1	High mobility group protein B1	1.17368	0.231038	0.507407	1
sp|Q8VCI5|PEX19_MOUSE	Q8VCI5	PEX19_MOUSE	Pex19	Peroxisomal biogenesis factor 19	0.701756	-0.510959	0.509361	1
sp|Q78JE5|FBX22_MOUSE	Q78JE5	FBX22_MOUSE	Fbxo22	F-box only protein 22	1.17267	0.229803	0.509954	1
sp|Q9D0M1|KPRA_MOUSE	Q9D0M1	KPRA_MOUSE	Prpsap1	Phosphoribosyl pyrophosphate synthase-associated protein 1	0.702162	-0.510124	0.511085	1
sp|Q8R010|AIMP2_MOUSE	Q8R010	AIMP2_MOUSE	Aimp2	Aminoacyl tRNA synthase complex-interacting multifunctional protein 2	0.702373	-0.50969	0.511981	1
sp|O54941|SMCE1_MOUSE	O54941	SMCE1_MOUSE	Smarce1	SWI/SNF-related matrix-associated actin-dependent regulator of chromatin subfamily E member 1	1.17183	0.22876	0.512108	1
sp|Q8C6G8|WDR26_MOUSE	Q8C6G8	WDR26_MOUSE	Wdr26	WD repeat-containing protein 26	1.17094	0.227662	0.514379	1
sp|Q91XU0|WRIP1_MOUSE	Q91XU0	WRIP1_MOUSE	Wrnip1	ATPase WRNIP1	1.1705	0.227123	0.515495	1
sp|O08917|FLOT1_MOUSE	O08917	FLOT1_MOUSE	Flot1	Flotillin-1	0.703222	-0.507947	0.515588	1
sp|P63242|IF5A1_MOUSE	P63242	IF5A1_MOUSE	Eif5a	Eukaryotic translation initiation factor 5A-1	1.1703	0.226873	0.516012	1
sp|Q3TIR3|RIC8A_MOUSE	Q3TIR3	RIC8A_MOUSE	Ric8a	Synembryn-A	0.703389	-0.507604	0.516298	1
sp|Q497I4|KRT35_MOUSE	Q497I4	KRT35_MOUSE	Krt35	Keratin, type I cuticular Ha5	1.16986	0.22634	0.517118	1
sp|Q99JY9|ARP3_MOUSE	Q99JY9	ARP3_MOUSE	Actr3	Actin-related protein 3	0.703594	-0.507185	0.517168	1
sp|Q91VL8|TE2IP_MOUSE	Q91VL8	TE2IP_MOUSE	Terf2ip	Telomeric repeat-binding factor 2-interacting protein 1	1.16981	0.226276	0.51725	1
sp|Q61214|DYR1A_MOUSE	Q61214	DYR1A_MOUSE	Dyrk1a	Dual specificity tyrosine-phosphorylation-regulated kinase 1A	1.1693	0.225645	0.518559	1
sp|P63321|RALA_MOUSE	P63321	RALA_MOUSE	Rala	Ras-related protein Ral-A	0.70419	-0.505963	0.519703	1
sp|P25976|UBF1_MOUSE	P25976	UBF1_MOUSE	Ubtf	Nucleolar transcription factor 1	1.16795	0.22398	0.522019	1
sp|P45591|COF2_MOUSE	P45591	COF2_MOUSE	Cfl2	Cofilin-2	1.16782	0.223821	0.52235	1
tr|E9Q3L2|E9Q3L2_MOUSE	E9Q3L2	E9Q3L2_MOUSE	Pi4ka	Protein Pi4ka	1.16781	0.22381	0.522371	1
sp|P58462|FOXP1_MOUSE	P58462	FOXP1_MOUSE	Foxp1	Forkhead box protein P1	0.704851	-0.504609	0.522517	1
tr|Q3U0V6|Q3U0V6_MOUSE	Q3U0V6	Q3U0V6_MOUSE	Zfp277	Protein Zfp277	0.704873	-0.504565	0.522609	1
sp|P51569|AGAL_MOUSE	P51569	AGAL_MOUSE	Gla	Alpha-galactosidase A	0.705227	-0.503841	0.524116	1
sp|P09671|SODM_MOUSE	P09671	SODM_MOUSE	Sod2	Superoxide dismutase [Mn], mitochondrial	1.16707	0.222894	0.524279	1
sp|A2RSY6|TRM1L_MOUSE	A2RSY6	TRM1L_MOUSE	Trmt1l	TRMT1-like protein	1.16672	0.222458	0.525188	1
sp|Q9CZR8|EFTS_MOUSE	Q9CZR8	EFTS_MOUSE	Tsfm	Elongation factor Ts, mitochondrial	1.16655	0.222243	0.525635	1
sp|Q9CQR6|PPP6_MOUSE	Q9CQR6	PPP6_MOUSE	Ppp6c	Serine/threonine-protein phosphatase 6 catalytic subunit	1.16633	0.22197	0.526203	1
sp|Q920B9|SP16H_MOUSE	Q920B9	SP16H_MOUSE	Supt16h	FACT complex subunit SPT16	1.16607	0.221659	0.526853	1
sp|Q9DBE9|SPB1_MOUSE	Q9DBE9	SPB1_MOUSE	Ftsj3	pre-rRNA processing protein FTSJ3	0.706056	-0.502146	0.527648	1
sp|Q9DB05|SNAA_MOUSE	Q9DB05	SNAA_MOUSE	Napa	Alpha-soluble NSF attachment protein	0.706468	-0.501303	0.529408	1
sp|Q921W0|CHM1A_MOUSE	Q921W0	CHM1A_MOUSE	Chmp1a	Charged multivesicular body protein 1a	1.16498	0.220303	0.529683	1
sp|Q61414|K1C15_MOUSE	Q61414	K1C15_MOUSE	Krt15	Keratin, type I cytoskeletal 15	0.706573	-0.501089	0.529857	1
sp|P01631|KV2A7_MOUSE	P01631	KV2A7_MOUSE	>sp|P01631|KV2A7_MOUSE	n/a	1.16374	0.218764	0.532901	1
sp|P62334|PRS10_MOUSE	P62334	PRS10_MOUSE	Psmc6	26S protease regulatory subunit 10B	0.707518	-0.499161	0.533888	1
sp|Q9WVM1|RGAP1_MOUSE	Q9WVM1	RGAP1_MOUSE	Racgap1	Rac GTPase-activating protein 1	1.16324	0.218147	0.534191	1
sp|P21279|GNAQ_MOUSE	P21279	GNAQ_MOUSE	Gnaq	Guanine nucleotide-binding protein G(q) subunit alpha	0.707889	-0.498405	0.535472	1
sp|Q78JW9|UBFD1_MOUSE	Q78JW9	UBFD1_MOUSE	Ubfd1	Ubiquitin domain-containing protein UBFD1	1.16159	0.216097	0.538489	1
sp|P14733|LMNB1_MOUSE	P14733	LMNB1_MOUSE	Lmnb1	Lamin-B1	0.708654	-0.496847	0.538739	1
sp|Q80UW8|RPAB1_MOUSE	Q80UW8	RPAB1_MOUSE	Polr2e	DNA-directed RNA polymerases I, II, and III subunit RPABC1	1.16076	0.215066	0.540654	1
sp|Q8K2F0|BRD3_MOUSE	Q8K2F0	BRD3_MOUSE	Brd3	Bromodomain-containing protein 3	1.16071	0.21501	0.540773	1
sp|P62631|EF1A2_MOUSE	P62631	EF1A2_MOUSE	Eef1a2	Elongation factor 1-alpha 2	0.709229	-0.495677	0.541198	1
sp|O09172|GSH0_MOUSE	O09172	GSH0_MOUSE	Gclm	Glutamate--cysteine ligase regulatory subunit	1.16054	0.214792	0.541231	1
sp|P70188|KIFA3_MOUSE	P70188	KIFA3_MOUSE	Kifap3	Kinesin-associated protein 3	1.16006	0.214196	0.542483	1
sp|Q9D7B1|DUS2L_MOUSE	Q9D7B1	DUS2L_MOUSE	Dus2	tRNA-dihydrouridine(20) synthase [NAD(P)+]-like	0.709536	-0.495053	0.542509	1
sp|P50431|GLYC_MOUSE	P50431	GLYC_MOUSE	Shmt1	Serine hydroxymethyltransferase, cytosolic	1.15956	0.213577	0.543787	1
sp|Q8BWM0|PGES2_MOUSE	Q8BWM0	PGES2_MOUSE	Ptges2	Prostaglandin E synthase 2	0.710003	-0.494102	0.54451	1
sp|Q9DCD5|TJAP1_MOUSE	Q9DCD5	TJAP1_MOUSE	Tjap1	Tight junction-associated protein 1	1.15881	0.212643	0.545753	1
tr|E9Q912|E9Q912_MOUSE	E9Q912	E9Q912_MOUSE	Rap1gds1	Protein Rap1gds1	0.710418	-0.49326	0.546284	1
tr|E9Q5E2|E9Q5E2_MOUSE	E9Q5E2	E9Q5E2_MOUSE	BC005561	Protein BC005561	0.710542	-0.493007	0.546817	1
sp|Q9D5V5|CUL5_MOUSE	Q9D5V5	CUL5_MOUSE	Cul5	Cullin-5	1.15778	0.211355	0.548468	1
sp|P63139|NFYB_MOUSE	P63139	NFYB_MOUSE	Nfyb	Nuclear transcription factor Y subunit beta	1.15763	0.211174	0.54885	1
sp|Q921I9|EXOS4_MOUSE	Q921I9	EXOS4_MOUSE	Exosc4	Exosome complex component RRP41	1.15711	0.210528	0.550214	1
sp|Q5UAK0|MIER1_MOUSE	Q5UAK0	MIER1_MOUSE	Mier1	Mesoderm induction early response protein 1	1.15667	0.209981	0.551367	1
sp|Q922R5|P4R3B_MOUSE	Q922R5	P4R3B_MOUSE	Smek2	Serine/threonine-protein phosphatase 4 regulatory subunit 3B	1.15645	0.209705	0.551952	1
sp|O08811|ERCC2_MOUSE	O08811	ERCC2_MOUSE	Ercc2	TFIIH basal transcription factor complex helicase XPD subunit	1.15634	0.209566	0.552244	1
sp|P47753|CAZA1_MOUSE	P47753	CAZA1_MOUSE	Capza1	F-actin-capping protein subunit alpha-1	1.15609	0.209254	0.552904	1
sp|Q9D8N2|FA45A_MOUSE	Q9D8N2	FA45A_MOUSE	Fam45a	Protein FAM45A	1.15592	0.209038	0.55336	1
sp|O88848|ARL6_MOUSE	O88848	ARL6_MOUSE	Arl6	ADP-ribosylation factor-like protein 6	1.15404	0.206692	0.558325	1
sp|Q69ZX6|MOR2A_MOUSE	Q69ZX6	MOR2A_MOUSE	Morc2a	MORC family CW-type zinc finger protein 2A	1.15389	0.206507	0.558718	1
sp|O54833|CSK22_MOUSE	O54833	CSK22_MOUSE	Csnk2a2	Casein kinase II subunit alpha'	1.15332	0.205789	0.560239	1
sp|Q7TSE6|ST38L_MOUSE	Q7TSE6	ST38L_MOUSE	Stk38l	Serine/threonine-protein kinase 38-like	1.15276	0.205093	0.561717	1
tr|Q91VU7|Q91VU7_MOUSE	Q91VU7	Q91VU7_MOUSE	Pus7	Protein Pus7	1.1527	0.205018	0.561877	1
tr|A2BIE1|A2BIE1_MOUSE	A2BIE1	A2BIE1_MOUSE	Qser1	Protein Qser1	1.15247	0.204732	0.562483	1
sp|Q65Z40|WAPL_MOUSE	Q65Z40	WAPL_MOUSE	Wapal	Wings apart-like protein homolog	1.15242	0.204671	0.562613	1
sp|P28656|NP1L1_MOUSE	P28656	NP1L1_MOUSE	Nap1l1	Nucleosome assembly protein 1-like 1	0.714282	-0.485434	0.562838	1
sp|Q9CQF0|RM11_MOUSE	Q9CQF0	RM11_MOUSE	Mrpl11	39S ribosomal protein L11, mitochondrial	0.714677	-0.484636	0.564531	1
sp|Q91ZJ5|UGPA_MOUSE	Q91ZJ5	UGPA_MOUSE	Ugp2	UTP--glucose-1-phosphate uridylyltransferase	0.71498	-0.484025	0.565831	1
sp|P35282|RAB21_MOUSE	P35282	RAB21_MOUSE	Rab21	Ras-related protein Rab-21	0.715375	-0.483227	0.567526	1
sp|Q3UJD6|UBP19_MOUSE	Q3UJD6	UBP19_MOUSE	Usp19	Ubiquitin carboxyl-terminal hydrolase 19	1.1505	0.202264	0.567727	1
sp|Q6GQT9|NOMO1_MOUSE	Q6GQT9	NOMO1_MOUSE	Nomo1	Nodal modulator 1	0.716302	-0.481361	0.571499	1
sp|Q02395|MTF2_MOUSE	Q02395	MTF2_MOUSE	Mtf2	Metal-response element-binding transcription factor 2	1.14842	0.199645	0.573302	1
sp|Q8BUN5|SMAD3_MOUSE	Q8BUN5	SMAD3_MOUSE	Smad3	Mothers against decapentaplegic homolog 3	1.14838	0.199596	0.573408	1
sp|Q7TT18|MCAF1_MOUSE	Q7TT18	MCAF1_MOUSE	Atf7ip	Activating transcription factor 7-interacting protein 1	1.14833	0.199541	0.573525	1
sp|Q64514|TPP2_MOUSE	Q64514	TPP2_MOUSE	Tpp2	Tripeptidyl-peptidase 2	1.14793	0.199035	0.574604	1
sp|Q62193|RFA2_MOUSE	Q62193	RFA2_MOUSE	Rpa2	Replication protein A 32 kDa subunit	1.147	0.197862	0.577107	1
sp|Q6P2L6|NSD3_MOUSE	Q6P2L6	NSD3_MOUSE	Whsc1l1	Histone-lysine N-methyltransferase NSD3	1.14698	0.19784	0.577153	1
sp|Q8K4L0|DDX54_MOUSE	Q8K4L0	DDX54_MOUSE	Ddx54	ATP-dependent RNA helicase DDX54	0.717623	-0.478702	0.577169	1
sp|Q9EQP2|EHD4_MOUSE	Q9EQP2	EHD4_MOUSE	Ehd4	EH domain-containing protein 4	0.717721	-0.478504	0.577591	1
sp|Q6ZPJ3|UBE2O_MOUSE	Q6ZPJ3	UBE2O_MOUSE	Ube2o	E2/E3 hybrid ubiquitin-protein ligase UBE2O	0.717723	-0.4785	0.577598	1
sp|Q6SJ95|TBPL2_MOUSE	Q6SJ95	TBPL2_MOUSE	Tbpl2	TATA box-binding protein-like protein 2	1.14637	0.197079	0.578778	1
sp|Q8CGA0|PPM1F_MOUSE	Q8CGA0	PPM1F_MOUSE	Ppm1f	Protein phosphatase 1F	0.718068	-0.477808	0.579077	1
sp|Q8CHI8|EP400_MOUSE	Q8CHI8	EP400_MOUSE	Ep400	E1A-binding protein p400	1.14552	0.196001	0.58108	1
sp|P02340|P53_MOUSE	P02340	P53_MOUSE	Tp53	Cellular tumor antigen p53	0.718608	-0.476724	0.581393	1
sp|Q6P1B1|XPP1_MOUSE	Q6P1B1	XPP1_MOUSE	Xpnpep1	Xaa-Pro aminopeptidase 1	1.14481	0.195105	0.582997	1
sp|Q9WU78|PDC6I_MOUSE	Q9WU78	PDC6I_MOUSE	Pdcd6ip	Programmed cell death 6-interacting protein	0.71929	-0.475355	0.584321	1
sp|Q9CQ37|UBE2T_MOUSE	Q9CQ37	UBE2T_MOUSE	Ube2t	Ubiquitin-conjugating enzyme E2 T	0.719331	-0.475273	0.584496	1
sp|Q8R2S9|ARP8_MOUSE	Q8R2S9	ARP8_MOUSE	Actr8	Actin-related protein 8	1.14392	0.193987	0.585389	1
sp|O88508|DNM3A_MOUSE	O88508	DNM3A_MOUSE	Dnmt3a	DNA (cytosine-5)-methyltransferase 3A	1.1437	0.193711	0.58598	1
sp|Q9QY36|NAA10_MOUSE	Q9QY36	NAA10_MOUSE	Naa10	N-alpha-acetyltransferase 10	0.719749	-0.474433	0.586293	1
tr|G5E8P1|G5E8P1_MOUSE	G5E8P1	G5E8P1_MOUSE	Brd1	MCG7283	1.14293	0.192736	0.588068	1
sp|Q9D903|EBP2_MOUSE	Q9D903	EBP2_MOUSE	Ebna1bp2	Probable rRNA-processing protein EBP2	0.720327	-0.473277	0.58877	1
sp|P08003|PDIA4_MOUSE	P08003	PDIA4_MOUSE	Pdia4	Protein disulfide-isomerase A4	0.720421	-0.473087	0.589177	1
sp|Q6DIC0|SMCA2_MOUSE	Q6DIC0	SMCA2_MOUSE	Smarca2	Probable global transcription activator SNF2L2	1.14233	0.191981	0.589684	1
sp|Q60823|AKT2_MOUSE	Q60823	AKT2_MOUSE	Akt2	RAC-beta serine/threonine-protein kinase	1.14202	0.191583	0.590537	1
sp|P62835|RAP1A_MOUSE	P62835	RAP1A_MOUSE	Rap1a	Ras-related protein Rap-1A	0.720938	-0.472053	0.591393	1
sp|P41230|KDM5C_MOUSE	P41230	KDM5C_MOUSE	Kdm5c	Lysine-specific demethylase 5C	1.14139	0.190796	0.592225	1
sp|Q9CRB9|CHCH3_MOUSE	Q9CRB9	CHCH3_MOUSE	Chchd3	Coiled-coil-helix-coiled-coil-helix domain-containing protein 3, mitochondrial	0.721403	-0.471122	0.59339	1
sp|Q9JIH2|NUP50_MOUSE	Q9JIH2	NUP50_MOUSE	Nup50	Nuclear pore complex protein Nup50	1.14085	0.190108	0.593702	1
sp|Q9R0X0|MED20_MOUSE	Q9R0X0	MED20_MOUSE	Med20	Mediator of RNA polymerase II transcription subunit 20	1.14066	0.189863	0.594227	1
sp|Q9EPK7|XPO7_MOUSE	Q9EPK7	XPO7_MOUSE	Xpo7	Exportin-7	1.14049	0.189653	0.594677	1
sp|P61255|RL26_MOUSE	P61255	RL26_MOUSE	Rpl26	60S ribosomal protein L26	0.72188	-0.470169	0.595435	1
sp|Q8BYH3|TRM13_MOUSE	Q8BYH3	TRM13_MOUSE	Trmt13	tRNA:m(4)X modification enzyme TRM13 homolog	1.13937	0.188233	0.597725	1
sp|P15920|VPP2_MOUSE	P15920	VPP2_MOUSE	Atp6v0a2	V-type proton ATPase 116 kDa subunit a isoform 2	0.722616	-0.468699	0.598591	1
sp|P30416|FKBP4_MOUSE	P30416	FKBP4_MOUSE	Fkbp4	Peptidyl-prolyl cis-trans isomerase FKBP4	1.13892	0.187668	0.59894	1
sp|Q9CWL8|CTBL1_MOUSE	Q9CWL8	CTBL1_MOUSE	Ctnnbl1	Beta-catenin-like protein 1	1.13834	0.186933	0.600518	1
sp|Q6ZPK0|PF21A_MOUSE	Q6ZPK0	PF21A_MOUSE	Phf21a	PHD finger protein 21A	1.13829	0.186868	0.600658	1
sp|P17665|COX7C_MOUSE	P17665	COX7C_MOUSE	Cox7c	Cytochrome c oxidase subunit 7C, mitochondrial	0.723404	-0.467127	0.601969	1
sp|Q8BMK4|CKAP4_MOUSE	Q8BMK4	CKAP4_MOUSE	Ckap4	Cytoskeleton-associated protein 4	0.723414	-0.467107	0.602012	1
sp|Q9ESV0|DDX24_MOUSE	Q9ESV0	DDX24_MOUSE	Ddx24	ATP-dependent RNA helicase DDX24	0.723506	-0.466923	0.602409	1
sp|Q9CR50|ZN363_MOUSE	Q9CR50	ZN363_MOUSE	Rchy1	RING finger and CHY zinc finger domain-containing protein 1	1.1376	0.185999	0.602527	1
sp|Q9D1D4|TMEDA_MOUSE	Q9D1D4	TMEDA_MOUSE	Tmed10	Transmembrane emp24 domain-containing protein 10	0.723654	-0.466628	0.603042	1
sp|Q9CR62|M2OM_MOUSE	Q9CR62	M2OM_MOUSE	Slc25a11	Mitochondrial 2-oxoglutarate/malate carrier protein	0.723712	-0.466512	0.603292	1
sp|Q61026|NCOA2_MOUSE	Q61026	NCOA2_MOUSE	Ncoa2	Nuclear receptor coactivator 2	1.13693	0.185138	0.604377	1
sp|P63085|MK01_MOUSE	P63085	MK01_MOUSE	Mapk1	Mitogen-activated protein kinase 1	1.13685	0.185037	0.604595	1
sp|Q91YT0|NDUV1_MOUSE	Q91YT0	NDUV1_MOUSE	Ndufv1	NADH dehydrogenase [ubiquinone] flavoprotein 1, mitochondrial	1.1356	0.183454	0.608001	1
sp|P55258|RAB8A_MOUSE	P55258	RAB8A_MOUSE	Rab8a	Ras-related protein Rab-8A	1.13551	0.183346	0.608235	1
sp|Q99NG0|ARIP4_MOUSE	Q99NG0	ARIP4_MOUSE	Rad54l2	Helicase ARIP4	1.13542	0.183229	0.608486	1
sp|O54950|AAKG1_MOUSE	O54950	AAKG1_MOUSE	Prkag1	5'-AMP-activated protein kinase subunit gamma-1	0.725109	-0.46373	0.609278	1
sp|P97351|RS3A_MOUSE	P97351	RS3A_MOUSE	Rps3a	40S ribosomal protein S3a	0.72522	-0.46351	0.609752	1
sp|P40142|TKT_MOUSE	P40142	TKT_MOUSE	Tkt	Transketolase	1.13473	0.182353	0.610372	1
sp|P97447|FHL1_MOUSE	P97447	FHL1_MOUSE	Fhl1	Four and a half LIM domains protein 1	1.13473	0.182347	0.610385	1
sp|P63038|CH60_MOUSE	P63038	CH60_MOUSE	Hspd1	60 kDa heat shock protein, mitochondrial	1.13461	0.182197	0.610708	1
sp|P62281|RS11_MOUSE	P62281	RS11_MOUSE	Rps11	40S ribosomal protein S11	0.725541	-0.46287	0.611131	1
sp|P32921|SYWC_MOUSE	P32921	SYWC_MOUSE	Wars	Tryptophan--tRNA ligase, cytoplasmic	0.725605	-0.462744	0.611402	1
tr|F8VQJ3|F8VQJ3_MOUSE	F8VQJ3	F8VQJ3_MOUSE	Lamc1	Laminin subunit gamma-1	0.726042	-0.461876	0.613273	1
sp|P19426|NELFE_MOUSE	P19426	NELFE_MOUSE	Nelfe	Negative elongation factor E	1.13362	0.180935	0.613429	1
sp|Q9ERB0|SNP29_MOUSE	Q9ERB0	SNP29_MOUSE	Snap29	Synaptosomal-associated protein 29	0.726186	-0.46159	0.613889	1
sp|Q8C1Y8|CCZ1_MOUSE	Q8C1Y8	CCZ1_MOUSE	Ccz1	Vacuolar fusion protein CCZ1 homolog	1.13309	0.180263	0.614876	1
sp|O55047|TLK2_MOUSE	O55047	TLK2_MOUSE	Tlk2	Serine/threonine-protein kinase tousled-like 2	1.13261	0.179655	0.616188	1
sp|O35857|TIM44_MOUSE	O35857	TIM44_MOUSE	Timm44	Mitochondrial import inner membrane translocase subunit TIM44	0.726886	-0.4602	0.616886	1
sp|P54103|DNJC2_MOUSE	P54103	DNJC2_MOUSE	Dnajc2	DnaJ homolog subfamily C member 2	1.13227	0.179213	0.617141	1
sp|Q3TDD9|PPR21_MOUSE	Q3TDD9	PPR21_MOUSE	Ppp1r21	Protein phosphatase 1 regulatory subunit 21	1.13215	0.179066	0.617457	1
sp|P62270|RS18_MOUSE	P62270	RS18_MOUSE	Rps18	40S ribosomal protein S18	0.727066	-0.459843	0.617657	1
sp|P51432|PLCB3_MOUSE	P51432	PLCB3_MOUSE	Plcb3	1-phosphatidylinositol 4,5-bisphosphate phosphodiesterase beta-3	0.727146	-0.459683	0.618	1
sp|Q3V1V3|ESF1_MOUSE	Q3V1V3	ESF1_MOUSE	Esf1	ESF1 homolog	1.13168	0.178467	0.618751	1
sp|P61222|ABCE1_MOUSE	P61222	ABCE1_MOUSE	Abce1	ATP-binding cassette sub-family E member 1	0.72733	-0.459319	0.618786	1
sp|P63276|RS17_MOUSE	P63276	RS17_MOUSE	Rps17	40S ribosomal protein S17	0.727577	-0.458827	0.619847	1
sp|P28740|KIF2A_MOUSE	P28740	KIF2A_MOUSE	Kif2a	Kinesin-like protein KIF2A	1.13086	0.177425	0.620997	1
sp|Q6P9Q4|FHOD1_MOUSE	Q6P9Q4	FHOD1_MOUSE	Fhod1	FH1/FH2 domain-containing protein 1	0.727958	-0.458074	0.621473	1
sp|Q6ZQB6|VIP2_MOUSE	Q6ZQB6	VIP2_MOUSE	Ppip5k2	Inositol hexakisphosphate and diphosphoinositol-pentakisphosphate kinase 2	1.13013	0.176492	0.623012	1
sp|Q9D0T1|NH2L1_MOUSE	Q9D0T1	NH2L1_MOUSE	Nhp2l1	NHP2-like protein 1	1.13005	0.176383	0.623246	1
tr|Q3U1M7|Q3U1M7_MOUSE	Q3U1M7	Q3U1M7_MOUSE	Zmynd8	Protein Zmynd8	1.12998	0.176297	0.623432	1
sp|Q3UHX2|HAP28_MOUSE	Q3UHX2	HAP28_MOUSE	Pdap1	28 kDa heat- and acid-stable phosphoprotein	1.12974	0.175985	0.624107	1
sp|Q8VEE1|LMCD1_MOUSE	Q8VEE1	LMCD1_MOUSE	Lmcd1	LIM and cysteine-rich domains protein 1	0.728737	-0.45653	0.624806	1
tr|Q80ZX0|Q80ZX0_MOUSE	Q80ZX0	Q80ZX0_MOUSE	Sec24b	Protein Sec24b	1.12922	0.175328	0.625524	1
sp|Q99KV1|DJB11_MOUSE	Q99KV1	DJB11_MOUSE	Dnajb11	DnaJ homolog subfamily B member 11	0.729035	-0.455941	0.626078	1
sp|Q61191|HCFC1_MOUSE	Q61191	HCFC1_MOUSE	Hcfc1	Host cell factor 1	1.12901	0.17506	0.626103	1
sp|P68368|TBA4A_MOUSE	P68368	TBA4A_MOUSE	Tuba4a	Tubulin alpha-4A chain	0.729051	-0.455907	0.62615	1
sp|Q922P9|GLYR1_MOUSE	Q922P9	GLYR1_MOUSE	Glyr1	Putative oxidoreductase GLYR1	1.12867	0.174622	0.62705	1
sp|P59325|IF5_MOUSE	P59325	IF5_MOUSE	Eif5	Eukaryotic translation initiation factor 5	0.729366	-0.455285	0.627493	1
sp|O88958|GNPI1_MOUSE	O88958	GNPI1_MOUSE	Gnpda1	Glucosamine-6-phosphate isomerase 1	0.729367	-0.455283	0.627499	1
sp|P62900|RL31_MOUSE	P62900	RL31_MOUSE	Rpl31	60S ribosomal protein L31	0.729516	-0.454989	0.628132	1
sp|Q6IME9|K2C72_MOUSE	Q6IME9	K2C72_MOUSE	Krt72	Keratin, type II cytoskeletal 72	1.12815	0.173955	0.62849	1
sp|Q9DBH5|LMAN2_MOUSE	Q9DBH5	LMAN2_MOUSE	Lman2	Vesicular integral-membrane protein VIP36	0.729676	-0.454672	0.628819	1
sp|Q3TPX4|EXOC5_MOUSE	Q3TPX4	EXOC5_MOUSE	Exoc5	Exocyst complex component 5	1.12769	0.173372	0.62975	1
sp|Q9QXE0|HACL1_MOUSE	Q9QXE0	HACL1_MOUSE	Hacl1	2-hydroxyacyl-CoA lyase 1	0.730127	-0.45378	0.630744	1
sp|P10630|IF4A2_MOUSE	P10630	IF4A2_MOUSE	Eif4a2	Eukaryotic initiation factor 4A-II	0.730249	-0.45354	0.631263	1
sp|Q9D7X8|GGCT_MOUSE	Q9D7X8	GGCT_MOUSE	Ggct	Gamma-glutamylcyclotransferase	0.730518	-0.453008	0.632413	1
sp|P34022|RANG_MOUSE	P34022	RANG_MOUSE	Ranbp1	Ran-specific GTPase-activating protein	0.730613	-0.452821	0.632818	1
sp|Q4FZG7|TI8AB_MOUSE	Q4FZG7	TI8AB_MOUSE	Timm8a2	Putative mitochondrial import inner membrane translocase subunit Tim8 A-B	1.12643	0.171763	0.633226	1
sp|Q5ND34|WDR81_MOUSE	Q5ND34	WDR81_MOUSE	Wdr81	WD repeat-containing protein 81	0.730852	-0.452349	0.633839	1
sp|Q80W54|FACE1_MOUSE	Q80W54	FACE1_MOUSE	Zmpste24	CAAX prenyl protease 1 homolog	0.73099	-0.452077	0.634426	1
sp|Q6P2B1|TNPO3_MOUSE	Q6P2B1	TNPO3_MOUSE	Tnpo3	Transportin-3	1.12572	0.170853	0.635194	1
sp|Q811J3|IREB2_MOUSE	Q811J3	IREB2_MOUSE	Ireb2	Iron-responsive element-binding protein 2	1.12572	0.170844	0.635213	1
sp|Q8K2W6|PHF13_MOUSE	Q8K2W6	PHF13_MOUSE	Phf13	PHD finger protein 13	1.12511	0.170063	0.636901	1
sp|Q8CIN4|PAK2_MOUSE	Q8CIN4	PAK2_MOUSE	Pak2	Serine/threonine-protein kinase PAK 2	1.12507	0.170018	0.636997	1
sp|O88696|CLPP_MOUSE	O88696	CLPP_MOUSE	Clpp	ATP-dependent Clp protease proteolytic subunit, mitochondrial	1.12482	0.16969	0.637706	1
sp|Q8VDN2|AT1A1_MOUSE	Q8VDN2	AT1A1_MOUSE	Atp1a1	Sodium/potassium-transporting ATPase subunit alpha-1	0.732515	-0.449069	0.640929	1
sp|P62627|DLRB1_MOUSE	P62627	DLRB1_MOUSE	Dynlrb1	Dynein light chain roadblock-type 1	0.732531	-0.449039	0.640994	1
sp|Q6IFZ6|K2C1B_MOUSE	Q6IFZ6	K2C1B_MOUSE	Krt77	Keratin, type II cytoskeletal 1b	0.73296	-0.448194	0.64282	1
sp|Q91YL3|UCKL1_MOUSE	Q91YL3	UCKL1_MOUSE	Uckl1	Uridine-cytidine kinase-like 1	0.732963	-0.448187	0.642837	1
sp|Q8K1R7|NEK9_MOUSE	Q8K1R7	NEK9_MOUSE	Nek9	Serine/threonine-protein kinase Nek9	0.733284	-0.447557	0.6442	1
sp|P62492|RB11A_MOUSE	P62492	RB11A_MOUSE	Rab11a	Ras-related protein Rab-11A	0.73334	-0.447445	0.64444	1
sp|Q3TEA8|HP1B3_MOUSE	Q3TEA8	HP1B3_MOUSE	Hp1bp3	Heterochromatin protein 1-binding protein 3	0.733471	-0.447188	0.644997	1
sp|Q9D906|ATG7_MOUSE	Q9D906	ATG7_MOUSE	Atg7	Ubiquitin-like modifier-activating enzyme ATG7	0.733557	-0.447018	0.645365	1
sp|Q80XI3|IF4G3_MOUSE	Q80XI3	IF4G3_MOUSE	Eif4g3	Eukaryotic translation initiation factor 4 gamma 3	1.12149	0.16542	0.646942	1
sp|Q8K1H1|TDRD7_MOUSE	Q8K1H1	TDRD7_MOUSE	Tdrd7	Tudor domain-containing protein 7	1.12125	0.165103	0.647629	1
sp|P60670|NPL4_MOUSE	P60670	NPL4_MOUSE	Nploc4	Nuclear protein localization protein 4 homolog	1.12118	0.165012	0.647824	1
sp|O89053|COR1A_MOUSE	O89053	COR1A_MOUSE	Coro1a	Coronin-1A	0.734238	-0.44568	0.648259	1
sp|Q9D1B9|RM28_MOUSE	Q9D1B9	RM28_MOUSE	Mrpl28	39S ribosomal protein L28, mitochondrial	0.734244	-0.445668	0.648285	1
sp|Q9QZ73|DCNL1_MOUSE	Q9QZ73	DCNL1_MOUSE	Dcun1d1	DCN1-like protein 1	0.734417	-0.445328	0.64902	1
sp|Q80Y17|L2GL1_MOUSE	Q80Y17	L2GL1_MOUSE	Llgl1	Lethal(2) giant larvae protein homolog 1	1.11987	0.163326	0.651472	1
sp|O35344|IMA4_MOUSE	O35344	IMA4_MOUSE	Kpna3	Importin subunit alpha-4	1.11954	0.162905	0.652383	1
sp|Q99M51|NCK1_MOUSE	Q99M51	NCK1_MOUSE	Nck1	Cytoplasmic protein NCK1	1.11871	0.161841	0.654684	1
sp|Q5SUR0|PUR4_MOUSE	Q5SUR0	PUR4_MOUSE	Pfas	Phosphoribosylformylglycinamidine synthase	1.11854	0.161616	0.655171	1
sp|Q9CWG8|NDUF7_MOUSE	Q9CWG8	NDUF7_MOUSE	Ndufaf7	NADH dehydrogenase [ubiquinone] complex I, assembly factor 7	1.11825	0.161244	0.655976	1
sp|Q7TME2|SPAG5_MOUSE	Q7TME2	SPAG5_MOUSE	Spag5	Sperm-associated antigen 5	0.736071	-0.442082	0.656042	1
sp|P97313|PRKDC_MOUSE	P97313	PRKDC_MOUSE	Prkdc	DNA-dependent protein kinase catalytic subunit	0.73632	-0.441595	0.657098	1
sp|P49615|CDK5_MOUSE	P49615	CDK5_MOUSE	Cdk5	Cyclin-dependent kinase 5	0.736636	-0.440976	0.658435	1
sp|Q9D6M3|GHC1_MOUSE	Q9D6M3	GHC1_MOUSE	Slc25a22	Mitochondrial glutamate carrier 1	0.736724	-0.440803	0.658811	1
sp|Q6ZPY7|KDM3B_MOUSE	Q6ZPY7	KDM3B_MOUSE	Kdm3b	Lysine-specific demethylase 3B	1.11723	0.159927	0.658825	1
sp|Q02956|KPCZ_MOUSE	Q02956	KPCZ_MOUSE	Prkcz	Protein kinase C zeta type	0.737345	-0.439587	0.66144	1
sp|Q3URV1|BROMI_MOUSE	Q3URV1	BROMI_MOUSE	Tbc1d32	Protein broad-minded	0.737474	-0.439336	0.661983	1
sp|Q3TC93|H1BP3_MOUSE	Q3TC93	H1BP3_MOUSE	Hs1bp3	HCLS1-binding protein 3	0.737814	-0.438671	0.663422	1
sp|Q5U458|DJC11_MOUSE	Q5U458	DJC11_MOUSE	Dnajc11	DnaJ homolog subfamily C member 11	0.737844	-0.438612	0.66355	1
sp|P49717|MCM4_MOUSE	P49717	MCM4_MOUSE	Mcm4	DNA replication licensing factor MCM4	1.11505	0.15711	0.66492	1
sp|P26231|CTNA1_MOUSE	P26231	CTNA1_MOUSE	Ctnna1	Catenin alpha-1	1.11489	0.156908	0.665357	1
sp|O88379|BAZ1A_MOUSE	O88379	BAZ1A_MOUSE	Baz1a	Bromodomain adjacent to zinc finger domain protein 1A	0.738369	-0.437587	0.665767	1
sp|Q9DCR2|AP3S1_MOUSE	Q9DCR2	AP3S1_MOUSE	Ap3s1	AP-3 complex subunit sigma-1	0.738611	-0.437112	0.666793	1
sp|Q9R0Q7|TEBP_MOUSE	Q9R0Q7	TEBP_MOUSE	Ptges3	Prostaglandin E synthase 3	0.738687	-0.436964	0.667114	1
sp|Q3UIL6|PKHA7_MOUSE	Q3UIL6	PKHA7_MOUSE	Plekha7	Pleckstrin homology domain-containing family A member 7	1.11424	0.156065	0.667179	1
sp|Q3UCQ1|FOXK2_MOUSE	Q3UCQ1	FOXK2_MOUSE	Foxk2	Forkhead box protein K2	1.11414	0.155934	0.667462	1
sp|Q9JMG7|HDGR3_MOUSE	Q9JMG7	HDGR3_MOUSE	Hdgfrp3	Hepatoma-derived growth factor-related protein 3	0.738948	-0.436455	0.668216	1
sp|Q9Z1J3|NFS1_MOUSE	Q9Z1J3	NFS1_MOUSE	Nfs1	Cysteine desulfurase, mitochondrial	1.11386	0.155564	0.668262	1
sp|P46660|AINX_MOUSE	P46660	AINX_MOUSE	Ina	Alpha-internexin	0.739034	-0.436288	0.668576	1
sp|P68037|UB2L3_MOUSE	P68037	UB2L3_MOUSE	Ube2l3	Ubiquitin-conjugating enzyme E2 L3	0.739143	-0.436075	0.669037	1
sp|Q6P9N1|HYCCI_MOUSE	Q6P9N1	HYCCI_MOUSE	Fam126a	Hyccin	0.739194	-0.435976	0.669252	1
sp|Q3UU96|MRCKA_MOUSE	Q3UU96	MRCKA_MOUSE	Cdc42bpa	Serine/threonine-protein kinase MRCK alpha	0.739607	-0.43517	0.670995	1
sp|P63017|HSP7C_MOUSE	P63017	HSP7C_MOUSE	Hspa8	Heat shock cognate 71 kDa protein	1.11286	0.154275	0.67105	1
sp|Q60972|RBBP4_MOUSE	Q60972	RBBP4_MOUSE	Rbbp4	Histone-binding protein RBBP4	1.11269	0.154048	0.67154	1
sp|Q8R1T1|CHMP7_MOUSE	Q8R1T1	CHMP7_MOUSE	Chmp7	Charged multivesicular body protein 7	1.11213	0.15333	0.673092	1
sp|P25911|LYN_MOUSE	P25911	LYN_MOUSE	Lyn	Tyrosine-protein kinase Lyn	0.740494	-0.43344	0.674733	1
sp|Q9Z1D1|EIF3G_MOUSE	Q9Z1D1	EIF3G_MOUSE	Eif3g	Eukaryotic translation initiation factor 3 subunit G	0.740601	-0.433231	0.675185	1
sp|P08553|NFM_MOUSE	P08553	NFM_MOUSE	Nefm	Neurofilament medium polypeptide	0.740628	-0.433178	0.675299	1
sp|P50096|IMDH1_MOUSE	P50096	IMDH1_MOUSE	Impdh1	Inosine-5'-monophosphate dehydrogenase 1	0.740686	-0.433066	0.675542	1
sp|P08551|NFL_MOUSE	P08551	NFL_MOUSE	Nefl	Neurofilament light polypeptide	0.740751	-0.432939	0.675816	1
sp|Q8BVI4|DHPR_MOUSE	Q8BVI4	DHPR_MOUSE	Qdpr	Dihydropteridine reductase	0.740889	-0.43267	0.676398	1
sp|P51150|RAB7A_MOUSE	P51150	RAB7A_MOUSE	Rab7a	Ras-related protein Rab-7a	0.741007	-0.43244	0.676894	1
sp|Q9JM52|MINK1_MOUSE	Q9JM52	MINK1_MOUSE	Mink1	Misshapen-like kinase 1	1.11039	0.151072	0.677973	1
sp|P61358|RL27_MOUSE	P61358	RL27_MOUSE	Rpl27	60S ribosomal protein L27	0.741274	-0.431922	0.678014	1
sp|P17751|TPIS_MOUSE	P17751	TPIS_MOUSE	Tpi1	Triosephosphate isomerase	0.741425	-0.431627	0.678652	1
sp|Q9D4H8|CUL2_MOUSE	Q9D4H8	CUL2_MOUSE	Cul2	Cullin-2	1.11002	0.15059	0.679014	1
sp|Q91YS8|KCC1A_MOUSE	Q91YS8	KCC1A_MOUSE	Camk1	Calcium/calmodulin-dependent protein kinase type 1	0.741558	-0.431369	0.679209	1
sp|Q9CZ04|CSN7A_MOUSE	Q9CZ04	CSN7A_MOUSE	Cops7a	COP9 signalosome complex subunit 7a	1.10971	0.150184	0.67989	1
sp|P51881|ADT2_MOUSE	P51881	ADT2_MOUSE	Slc25a5	ADP/ATP translocase 2	1.10956	0.149987	0.680318	1
sp|Q7TMY7|IPO8_MOUSE	Q7TMY7	IPO8_MOUSE	Ipo8	Importin-8	1.10904	0.149314	0.681771	1
sp|Q6ZWV7|RL35_MOUSE	Q6ZWV7	RL35_MOUSE	Rpl35	60S ribosomal protein L35	0.742177	-0.430164	0.681811	1
sp|Q8BPM2|M4K5_MOUSE	Q8BPM2	M4K5_MOUSE	Map4k5	Mitogen-activated protein kinase kinase kinase kinase 5	1.10876	0.148951	0.682553	1
sp|P46471|PRS7_MOUSE	P46471	PRS7_MOUSE	Psmc2	26S protease regulatory subunit 7	0.743154	-0.428267	0.685907	1
sp|Q9QYA2|TOM40_MOUSE	Q9QYA2	TOM40_MOUSE	Tomm40	Mitochondrial import receptor subunit TOM40 homolog	1.10737	0.147141	0.686463	1
sp|P62911|RL32_MOUSE	P62911	RL32_MOUSE	Rpl32	60S ribosomal protein L32	0.743523	-0.427552	0.687451	1
sp|O54692|ZW10_MOUSE	O54692	ZW10_MOUSE	Zw10	Centromere/kinetochore protein zw10 homolog	0.743636	-0.427331	0.687928	1
sp|P27641|XRCC5_MOUSE	P27641	XRCC5_MOUSE	Xrcc5	X-ray repair cross-complementing protein 5	0.743736	-0.427137	0.688345	1
sp|A2AHJ4|BRWD3_MOUSE	A2AHJ4	BRWD3_MOUSE	Brwd3	Bromodomain and WD repeat-containing protein 3	1.10651	0.146014	0.688893	1
sp|O35345|IMA7_MOUSE	O35345	IMA7_MOUSE	Kpna6	Importin subunit alpha-7	1.10577	0.145056	0.690961	1
tr|Q6ZWZ6|Q6ZWZ6_MOUSE	Q6ZWZ6	Q6ZWZ6_MOUSE	Rps12	40S ribosomal protein S12	0.74438	-0.425889	0.691038	1
sp|O55042|SYUA_MOUSE	O55042	SYUA_MOUSE	Snca	Alpha-synuclein	0.744484	-0.425686	0.691474	1
sp|Q8BHE8|CB047_MOUSE	Q8BHE8	CB047_MOUSE	>sp|Q8BHE8|CB047_MOUSE	n/a	0.744709	-0.425251	0.692412	1
sp|Q922B1|MACD1_MOUSE	Q922B1	MACD1_MOUSE	Macrod1	O-acetyl-ADP-ribose deacetylase MACROD1	0.74487	-0.42494	0.693084	1
sp|A6H611|MIPEP_MOUSE	A6H611	MIPEP_MOUSE	Mipep	Mitochondrial intermediate peptidase	1.10443	0.143305	0.694734	1
tr|Q6A099|Q6A099_MOUSE	Q6A099	Q6A099_MOUSE	Gbf1	MKIAA0248 protein (Fragment)	0.745361	-0.423989	0.695134	1
sp|Q9CU62|SMC1A_MOUSE	Q9CU62	SMC1A_MOUSE	Smc1a	Structural maintenance of chromosomes protein 1A	1.10416	0.142951	0.695498	1
sp|Q9WTM5|RUVB2_MOUSE	Q9WTM5	RUVB2_MOUSE	Ruvbl2	RuvB-like 2	1.10401	0.14275	0.695931	1
sp|Q8CF89|TAB1_MOUSE	Q8CF89	TAB1_MOUSE	Tab1	TGF-beta-activated kinase 1 and MAP3K7-binding protein 1	0.745763	-0.42321	0.696811	1
sp|Q6P2K6|P4R3A_MOUSE	Q6P2K6	P4R3A_MOUSE	Smek1	Serine/threonine-protein phosphatase 4 regulatory subunit 3A	1.10357	0.142172	0.697175	1
sp|P26450|P85A_MOUSE	P26450	P85A_MOUSE	Pik3r1	Phosphatidylinositol 3-kinase regulatory subunit alpha	1.10351	0.142101	0.697329	1
tr|E9Q616|E9Q616_MOUSE	E9Q616	E9Q616_MOUSE	Ahnak	Protein Ahnak	1.10328	0.141793	0.697992	1
sp|Q9Z1Z2|STRAP_MOUSE	Q9Z1Z2	STRAP_MOUSE	Strap	Serine-threonine kinase receptor-associated protein	1.10273	0.141083	0.69952	1
sp|Q9CPN8|IF2B3_MOUSE	Q9CPN8	IF2B3_MOUSE	Igf2bp3	Insulin-like growth factor 2 mRNA-binding protein 3	1.10265	0.140977	0.699748	1
sp|Q9D7A8|ARMC1_MOUSE	Q9D7A8	ARMC1_MOUSE	Armc1	Armadillo repeat-containing protein 1	0.746914	-0.420986	0.701599	1
sp|Q9QZM0|UBQL2_MOUSE	Q9QZM0	UBQL2_MOUSE	Ubqln2	Ubiquilin-2	1.10197	0.140091	0.701656	1
sp|Q8K2A7|INT10_MOUSE	Q8K2A7	INT10_MOUSE	Ints10	Integrator complex subunit 10	1.1018	0.139867	0.702137	1
sp|Q60989|XIAP_MOUSE	Q60989	XIAP_MOUSE	Xiap	E3 ubiquitin-protein ligase XIAP	1.10177	0.13983	0.702218	1
sp|P97789|XRN1_MOUSE	P97789	XRN1_MOUSE	Xrn1	5'-3' exoribonuclease 1	1.10175	0.139803	0.702275	1
sp|O88448|KLC2_MOUSE	O88448	KLC2_MOUSE	Klc2	Kinesin light chain 2	0.747898	-0.419086	0.705686	1
sp|P32883|RASK_MOUSE	P32883	RASK_MOUSE	Kras	GTPase KRas	0.748013	-0.418866	0.70616	1
sp|Q9CY58|PAIRB_MOUSE	Q9CY58	PAIRB_MOUSE	Serbp1	Plasminogen activator inhibitor 1 RNA-binding protein	1.10019	0.137753	0.706683	1
tr|Q91V89|Q91V89_MOUSE	Q91V89	Q91V89_MOUSE	Ppp2r5d	Protein Ppp2r5d	1.09999	0.137494	0.707239	1
sp|Q99LC5|ETFA_MOUSE	Q99LC5	ETFA_MOUSE	Etfa	Electron transfer flavoprotein subunit alpha, mitochondrial	1.09995	0.137436	0.707364	1
sp|Q9D8X5|CNOT8_MOUSE	Q9D8X5	CNOT8_MOUSE	Cnot8	CCR4-NOT transcription complex subunit 8	0.74856	-0.417809	0.70843	1
sp|Q8VDP6|CDIPT_MOUSE	Q8VDP6	CDIPT_MOUSE	Cdipt	CDP-diacylglycerol--inositol 3-phosphatidyltransferase	1.09954	0.136907	0.708502	1
tr|G3X9B1|G3X9B1_MOUSE	G3X9B1	G3X9B1_MOUSE	Heatr1	HEAT repeat containing 1	0.748633	-0.417669	0.708731	1
sp|Q8CFD5|ERCC8_MOUSE	Q8CFD5	ERCC8_MOUSE	Ercc8	DNA excision repair protein ERCC-8	1.09929	0.136572	0.709222	1
sp|P05132|KAPCA_MOUSE	P05132	KAPCA_MOUSE	Prkaca	cAMP-dependent protein kinase catalytic subunit alpha	0.748948	-0.417062	0.710034	1
sp|P62717|RL18A_MOUSE	P62717	RL18A_MOUSE	Rpl18a	60S ribosomal protein L18a	0.749049	-0.416868	0.710452	1
sp|Q9DBX2|PHLP_MOUSE	Q9DBX2	PHLP_MOUSE	Pdcl	Phosducin-like protein	1.09881	0.13594	0.710578	1
sp|Q9CZC8|SCRN1_MOUSE	Q9CZC8	SCRN1_MOUSE	Scrn1	Secernin-1	1.09866	0.135746	0.710995	1
sp|O54998|FKBP7_MOUSE	O54998	FKBP7_MOUSE	Fkbp7	Peptidyl-prolyl cis-trans isomerase FKBP7	0.749328	-0.416331	0.711605	1
sp|Q8CEC0|NUP88_MOUSE	Q8CEC0	NUP88_MOUSE	Nup88	Nuclear pore complex protein Nup88	0.749678	-0.415657	0.713051	1
sp|Q8BG40|KTNB1_MOUSE	Q8BG40	KTNB1_MOUSE	Katnb1	Katanin p80 WD40 repeat-containing subunit B1	1.09784	0.134666	0.713313	1
sp|Q8C5L7|RBM34_MOUSE	Q8C5L7	RBM34_MOUSE	Rbm34	RNA-binding protein 34	0.749808	-0.415408	0.713585	1
sp|Q8VEM8|MPCP_MOUSE	Q8VEM8	MPCP_MOUSE	Slc25a3	Phosphate carrier protein, mitochondrial	1.09762	0.13438	0.713926	1
sp|P19536|COX5B_MOUSE	P19536	COX5B_MOUSE	Cox5b	Cytochrome c oxidase subunit 5B, mitochondrial	1.09749	0.134207	0.714298	1
sp|O35643|AP1B1_MOUSE	O35643	AP1B1_MOUSE	Ap1b1	AP-1 complex subunit beta-1	0.750093	-0.414859	0.714763	1
sp|Q61216|MRE11_MOUSE	Q61216	MRE11_MOUSE	Mre11a	Double-strand break repair protein MRE11A	1.09713	0.133737	0.715304	1
sp|Q60931|VDAC3_MOUSE	Q60931	VDAC3_MOUSE	Vdac3	Voltage-dependent anion-selective channel protein 3	0.750308	-0.414444	0.715652	1
sp|Q7TMF3|NDUAC_MOUSE	Q7TMF3	NDUAC_MOUSE	Ndufa12	NADH dehydrogenase [ubiquinone] 1 alpha subcomplex subunit 12	0.750403	-0.414263	0.716039	1
sp|O08808|DIAP1_MOUSE	O08808	DIAP1_MOUSE	Diaph1	Protein diaphanous homolog 1	0.750511	-0.414055	0.716485	1
sp|Q5FWK3|RHG01_MOUSE	Q5FWK3	RHG01_MOUSE	Arhgap1	Rho GTPase-activating protein 1	0.750511	-0.414054	0.716488	1
sp|P62908|RS3_MOUSE	P62908	RS3_MOUSE	Rps3	40S ribosomal protein S3	0.750577	-0.413929	0.716756	1
sp|P10126|EF1A1_MOUSE	P10126	EF1A1_MOUSE	Eef1a1	Elongation factor 1-alpha 1	0.750687	-0.413717	0.71721	1
sp|P70399|TP53B_MOUSE	P70399	TP53B_MOUSE	Tp53bp1	Tumor suppressor p53-binding protein 1	0.750753	-0.41359	0.717482	1
sp|O08585|CLCA_MOUSE	O08585	CLCA_MOUSE	Clta	Clathrin light chain A	0.750804	-0.413491	0.717694	1
sp|Q8R429|AT2A1_MOUSE	Q8R429	AT2A1_MOUSE	Atp2a1	Sarcoplasmic/endoplasmic reticulum calcium ATPase 1	0.750958	-0.413196	0.718326	1
sp|P40201|CHD1_MOUSE	P40201	CHD1_MOUSE	Chd1	Chromodomain-helicase-DNA-binding protein 1	1.09598	0.132222	0.718551	1
tr|B1ART1|B1ART1_MOUSE	B1ART1	B1ART1_MOUSE	Vps13d	Protein Vps13d	1.09503	0.130975	0.72122	1
sp|P63037|DNJA1_MOUSE	P63037	DNJA1_MOUSE	Dnaja1	DnaJ homolog subfamily A member 1	0.752204	-0.410804	0.723446	1
sp|Q9QYR6|MAP1A_MOUSE	Q9QYR6	MAP1A_MOUSE	Map1a	Microtubule-associated protein 1A	1.09416	0.129829	0.723672	1
sp|Q99LB6|MAT2B_MOUSE	Q99LB6	MAT2B_MOUSE	Mat2b	Methionine adenosyltransferase 2 subunit beta	1.09401	0.129622	0.724115	1
sp|O35638|STAG2_MOUSE	O35638	STAG2_MOUSE	Stag2	Cohesin subunit SA-2	1.09378	0.129328	0.724743	1
sp|Q9CQR5|ZMAT5_MOUSE	Q9CQR5	ZMAT5_MOUSE	Zmat5	Zinc finger matrin-type protein 5	1.0937	0.129221	0.724972	1
sp|Q99L48|NMD3_MOUSE	Q99L48	NMD3_MOUSE	Nmd3	60S ribosomal export protein NMD3	1.09354	0.129008	0.725428	1
sp|Q3TXT3|SOSSC_MOUSE	Q3TXT3	SOSSC_MOUSE	Inip	SOSS complex subunit C	1.09342	0.128847	0.725772	1
sp|Q9CR89|ERGI2_MOUSE	Q9CR89	ERGI2_MOUSE	Ergic2	Endoplasmic reticulum-Golgi intermediate compartment protein 2	0.752873	-0.409521	0.726188	1
sp|Q9CRA5|GOLP3_MOUSE	Q9CRA5	GOLP3_MOUSE	Golph3	Golgi phosphoprotein 3	0.752912	-0.409446	0.726348	1
sp|Q60996|2A5G_MOUSE	Q60996	2A5G_MOUSE	Ppp2r5c	Serine/threonine-protein phosphatase 2A 56 kDa regulatory subunit gamma isoform	1.09303	0.128327	0.726883	1
sp|Q61696|HS71A_MOUSE	Q61696	HS71A_MOUSE	Hspa1a	Heat shock 70 kDa protein 1A	0.7531	-0.409087	0.727115	1
sp|Q9CWM4|PFD1_MOUSE	Q9CWM4	PFD1_MOUSE	Pfdn1	Prefoldin subunit 1	1.09208	0.127073	0.729559	1
sp|Q61584|FXR1_MOUSE	Q61584	FXR1_MOUSE	Fxr1	Fragile X mental retardation syndrome-related protein 1	1.09183	0.126749	0.73025	1
sp|Q8BP67|RL24_MOUSE	Q8BP67	RL24_MOUSE	Rpl24	60S ribosomal protein L24	0.753921	-0.407515	0.730469	1
sp|Q3U9G9|LBR_MOUSE	Q3U9G9	LBR_MOUSE	Lbr	Lamin-B receptor	0.754048	-0.407272	0.730988	1
sp|P35550|FBRL_MOUSE	P35550	FBRL_MOUSE	Fbl	rRNA 2'-O-methyltransferase fibrillarin	1.09156	0.126396	0.731003	1
sp|Q08024-2|PEBB_MOUSE	Q08024-2	PEBB_MOUSE	Cbfb	Isoform 2 of Core-binding factor subunit beta	1.09151	0.126324	0.731157	1
sp|Q8BK72|RT27_MOUSE	Q8BK72	RT27_MOUSE	Mrps27	28S ribosomal protein S27, mitochondrial	1.09141	0.126189	0.731445	1
sp|P56960|EXOSX_MOUSE	P56960	EXOSX_MOUSE	Exosc10	Exosome component 10	1.09135	0.126116	0.731599	1
sp|Q60992|VAV2_MOUSE	Q60992	VAV2_MOUSE	Vav2	Guanine nucleotide exchange factor VAV2	0.754226	-0.40693	0.731717	1
tr|F8VQC1|F8VQC1_MOUSE	F8VQC1	F8VQC1_MOUSE	Srp72	Signal recognition particle subunit SRP72	0.754248	-0.406889	0.731805	1
sp|P53811|PIPNB_MOUSE	P53811	PIPNB_MOUSE	Pitpnb	Phosphatidylinositol transfer protein beta isoform	1.09107	0.125738	0.732405	1
sp|P63280|UBC9_MOUSE	P63280	UBC9_MOUSE	Ube2i	SUMO-conjugating enzyme UBC9	1.09094	0.125571	0.732761	1
sp|Q9CZ28|SNF8_MOUSE	Q9CZ28	SNF8_MOUSE	Snf8	Vacuolar-sorting protein SNF8	1.09087	0.125479	0.732958	1
sp|Q925H1|TRPS1_MOUSE	Q925H1	TRPS1_MOUSE	Trps1	Zinc finger transcription factor Trps1	1.09082	0.125413	0.733099	1
sp|Q3URQ0|TEX10_MOUSE	Q3URQ0	TEX10_MOUSE	Tex10	Testis-expressed sequence 10 protein	1.09063	0.125165	0.733628	1
sp|Q6PHZ2|KCC2D_MOUSE	Q6PHZ2	KCC2D_MOUSE	Camk2d	Calcium/calmodulin-dependent protein kinase type II subunit delta	0.754916	-0.405611	0.734527	1
sp|Q8C754|VPS52_MOUSE	Q8C754	VPS52_MOUSE	Vps52	Vacuolar protein sorting-associated protein 52 homolog	0.755002	-0.405447	0.734877	1
sp|O70310|NMT1_MOUSE	O70310	NMT1_MOUSE	Nmt1	Glycylpeptide N-tetradecanoyltransferase 1	0.755053	-0.40535	0.735084	1
sp|A2ADY9|DDI2_MOUSE	A2ADY9	DDI2_MOUSE	Ddi2	Protein DDI1 homolog 2	0.755079	-0.405301	0.735187	1
tr|F8VPN4|F8VPN4_MOUSE	F8VPN4	F8VPN4_MOUSE	Agl	Protein Agl	1.09003	0.124362	0.735337	1
sp|P14211|CALR_MOUSE	P14211	CALR_MOUSE	Calr	Calreticulin	0.755236	-0.405001	0.735826	1
sp|Q64487|PTPRD_MOUSE	Q64487	PTPRD_MOUSE	Ptprd	Receptor-type tyrosine-protein phosphatase delta	0.755286	-0.404906	0.736029	1
sp|Q99KR7|PPIF_MOUSE	Q99KR7	PPIF_MOUSE	Ppif	Peptidyl-prolyl cis-trans isomerase F, mitochondrial	1.08974	0.123982	0.736146	1
sp|P49135|ERCC3_MOUSE	P49135	ERCC3_MOUSE	Ercc3	TFIIH basal transcription factor complex helicase XPB subunit	0.755374	-0.404737	0.736388	1
sp|O35129|PHB2_MOUSE	O35129	PHB2_MOUSE	Phb2	Prohibitin-2	0.755541	-0.404418	0.737066	1
sp|O35250|EXOC7_MOUSE	O35250	EXOC7_MOUSE	Exoc7	Exocyst complex component 7	0.755833	-0.40386	0.738253	1
sp|Q9WTP6|KAD2_MOUSE	Q9WTP6	KAD2_MOUSE	Ak2	Adenylate kinase 2, mitochondrial	0.75617	-0.403217	0.739621	1
sp|O55143|AT2A2_MOUSE	O55143	AT2A2_MOUSE	Atp2a2	Sarcoplasmic/endoplasmic reticulum calcium ATPase 2	0.756373	-0.40283	0.740442	1
sp|Q6ZWX6|IF2A_MOUSE	Q6ZWX6	IF2A_MOUSE	Eif2s1	Eukaryotic translation initiation factor 2 subunit 1	1.08776	0.121363	0.741711	1
sp|P62192|PRS4_MOUSE	P62192	PRS4_MOUSE	Psmc1	26S protease regulatory subunit 4	0.756991	-0.401653	0.742941	1
sp|Q80ZI6|LRSM1_MOUSE	Q80ZI6	LRSM1_MOUSE	Lrsam1	E3 ubiquitin-protein ligase LRSAM1	1.08708	0.120461	0.743625	1
sp|Q91ZW3|SMCA5_MOUSE	Q91ZW3	SMCA5_MOUSE	Smarca5	SWI/SNF-related matrix-associated actin-dependent regulator of chromatin subfamily A member 5	1.08699	0.12034	0.743883	1
sp|Q9EP69|SAC1_MOUSE	Q9EP69	SAC1_MOUSE	Sacm1l	Phosphatidylinositide phosphatase SAC1	0.757292	-0.401079	0.744159	1
sp|Q61239|FNTA_MOUSE	Q61239	FNTA_MOUSE	Fnta	Protein farnesyltransferase/geranylgeranyltransferase type-1 subunit alpha	1.08674	0.120007	0.744589	1
sp|Q9QXL2|KI21A_MOUSE	Q9QXL2	KI21A_MOUSE	Kif21a	Kinesin-like protein KIF21A	1.08612	0.11919	0.74632	1
sp|Q8BGR9|UBCP1_MOUSE	Q8BGR9	UBCP1_MOUSE	Ublcp1	Ubiquitin-like domain-containing CTD phosphatase 1	1.08607	0.119122	0.746463	1
sp|P35979|RL12_MOUSE	P35979	RL12_MOUSE	Rpl12	60S ribosomal protein L12	1.08604	0.119081	0.746552	1
sp|P35486|ODPA_MOUSE	P35486	ODPA_MOUSE	Pdha1	Pyruvate dehydrogenase E1 component subunit alpha, somatic form, mitochondrial	1.08585	0.11882	0.747103	1
sp|Q8CEE7|RDH13_MOUSE	Q8CEE7	RDH13_MOUSE	Rdh13	Retinol dehydrogenase 13	1.08579	0.118749	0.747253	1
sp|Q9R0B9|PLOD2_MOUSE	Q9R0B9	PLOD2_MOUSE	Plod2	Procollagen-lysine,2-oxoglutarate 5-dioxygenase 2	0.758107	-0.399527	0.747447	1
sp|Q9JIX0|ENY2_MOUSE	Q9JIX0	ENY2_MOUSE	Eny2	Transcription and mRNA export factor ENY2	0.758202	-0.399345	0.747831	1
sp|P62874|GBB1_MOUSE	P62874	GBB1_MOUSE	Gnb1	Guanine nucleotide-binding protein G(I)/G(S)/G(T) subunit beta-1	0.758225	-0.399302	0.747923	1
sp|Q3TNA1|XYLB_MOUSE	Q3TNA1	XYLB_MOUSE	Xylb	Xylulose kinase	0.758435	-0.398902	0.748769	1
sp|Q62141|SIN3B_MOUSE	Q62141	SIN3B_MOUSE	Sin3b	Paired amphipathic helix protein Sin3b	1.08516	0.117903	0.749043	1
sp|Q9CYH6|RRS1_MOUSE	Q9CYH6	RRS1_MOUSE	Rrs1	Ribosome biogenesis regulatory protein homolog	0.758965	-0.397894	0.750901	1
sp|P60867|RS20_MOUSE	P60867	RS20_MOUSE	Rps20	40S ribosomal protein S20	0.758977	-0.397872	0.750948	1
sp|Q9CZX8|RS19_MOUSE	Q9CZX8	RS19_MOUSE	Rps19	40S ribosomal protein S19	0.759023	-0.397784	0.751134	1
sp|Q8CDM1|ATAD2_MOUSE	Q8CDM1	ATAD2_MOUSE	Atad2	ATPase family AAA domain-containing protein 2	0.759144	-0.397555	0.751617	1
sp|P63001|RAC1_MOUSE	P63001	RAC1_MOUSE	Rac1	Ras-related C3 botulinum toxin substrate 1	0.759378	-0.397109	0.752559	1
sp|Q8JZV9|BDH2_MOUSE	Q8JZV9	BDH2_MOUSE	Bdh2	3-hydroxybutyrate dehydrogenase type 2	0.759389	-0.397089	0.752601	1
tr|Q8K1M3|Q8K1M3_MOUSE	Q8K1M3	Q8K1M3_MOUSE	Prkar2a	Protein kinase, cAMP dependent regulatory, type II alpha	0.75963	-0.39663	0.75357	1
sp|Q9CR57|RL14_MOUSE	Q9CR57	RL14_MOUSE	Rpl14	60S ribosomal protein L14	0.759753	-0.396398	0.75406	1
sp|P55012|S12A2_MOUSE	P55012	S12A2_MOUSE	Slc12a2	Solute carrier family 12 member 2	0.759797	-0.396313	0.754239	1
sp|Q9ERE2|KRT81_MOUSE	Q9ERE2	KRT81_MOUSE	Krt81	Keratin, type II cuticular Hb1	0.759887	-0.396143	0.754598	1
sp|Q9R190|MTA2_MOUSE	Q9R190	MTA2_MOUSE	Mta2	Metastasis-associated protein MTA2	1.08311	0.115186	0.754784	1
sp|Q6ZPY2|SMG5_MOUSE	Q6ZPY2	SMG5_MOUSE	Smg5	Protein SMG5	1.08282	0.114789	0.755621	1
sp|Q8BJZ4|RT35_MOUSE	Q8BJZ4	RT35_MOUSE	Mrps35	28S ribosomal protein S35, mitochondrial	1.08274	0.114686	0.755838	1
tr|E9Q368|E9Q368_MOUSE	E9Q368	E9Q368_MOUSE	Gm17296	Protein Gm17296	1.08263	0.114543	0.756141	1
sp|P24860|CCNB1_MOUSE	P24860	CCNB1_MOUSE	Ccnb1	G2/mitotic-specific cyclin-B1	1.08245	0.114301	0.756651	1
sp|P31324|KAP3_MOUSE	P31324	KAP3_MOUSE	Prkar2b	cAMP-dependent protein kinase type II-beta regulatory subunit	0.760438	-0.395097	0.756804	1
sp|Q01405|SC23A_MOUSE	Q01405	SC23A_MOUSE	Sec23a	Protein transport protein Sec23A	0.760524	-0.394934	0.757147	1
sp|Q9D7N3|RT09_MOUSE	Q9D7N3	RT09_MOUSE	Mrps9	28S ribosomal protein S9, mitochondrial	0.760671	-0.394655	0.757734	1
sp|P13439|UMPS_MOUSE	P13439	UMPS_MOUSE	Umps	Uridine 5'-monophosphate synthase	0.760714	-0.394574	0.757905	1
sp|Q7TMV1|RN139_MOUSE	Q7TMV1	RN139_MOUSE	Rnf139	E3 ubiquitin-protein ligase RNF139	0.76081	-0.394391	0.75829	1
sp|Q8C4X2|KC1G3_MOUSE	Q8C4X2	KC1G3_MOUSE	Csnk1g3	Casein kinase I isoform gamma-3	1.08163	0.113208	0.758952	1
sp|A2A6Q5|CDC27_MOUSE	A2A6Q5	CDC27_MOUSE	Cdc27	Cell division cycle protein 27 homolog	0.761046	-0.393945	0.759229	1
sp|P62267|RS23_MOUSE	P62267	RS23_MOUSE	Rps23	40S ribosomal protein S23	1.08152	0.113056	0.759271	1
sp|P47857|K6PF_MOUSE	P47857	K6PF_MOUSE	Pfkm	ATP-dependent 6-phosphofructokinase, muscle type	0.7612	-0.393653	0.759843	1
sp|Q9JJT0|RCL1_MOUSE	Q9JJT0	RCL1_MOUSE	Rcl1	RNA 3'-terminal phosphate cyclase-like protein	1.08123	0.112675	0.760072	1
sp|Q9D7X3|DUS3_MOUSE	Q9D7X3	DUS3_MOUSE	Dusp3	Dual specificity protein phosphatase 3	1.081	0.112362	0.76073	1
sp|P26638|SYSC_MOUSE	P26638	SYSC_MOUSE	Sars	Serine--tRNA ligase, cytoplasmic	1.08051	0.111708	0.762106	1
sp|P12970|RL7A_MOUSE	P12970	RL7A_MOUSE	Rpl7a	60S ribosomal protein L7a	0.762007	-0.392123	0.763059	1
sp|Q9D071|MMS19_MOUSE	Q9D071	MMS19_MOUSE	Mms19	MMS19 nucleotide excision repair protein homolog	1.08014	0.111212	0.763147	1
sp|P26443|DHE3_MOUSE	P26443	DHE3_MOUSE	Glud1	Glutamate dehydrogenase 1, mitochondrial	1.07998	0.111009	0.763572	1
sp|Q9JMK2|KC1E_MOUSE	Q9JMK2	KC1E_MOUSE	Csnk1e	Casein kinase I isoform epsilon	1.07927	0.110062	0.765559	1
sp|Q60865|CAPR1_MOUSE	Q60865	CAPR1_MOUSE	Caprin1	Caprin-1	1.07908	0.109798	0.766112	1
sp|O55142|RL35A_MOUSE	O55142	RL35A_MOUSE	Rpl35a	60S ribosomal protein L35a	0.762917	-0.390403	0.766667	1
sp|Q9R0G7|ZEB2_MOUSE	Q9R0G7	ZEB2_MOUSE	Zeb2	Zinc finger E-box-binding homeobox 2	0.763016	-0.390215	0.767059	1
sp|Q9QYS9|QKI_MOUSE	Q9QYS9	QKI_MOUSE	Qki	Protein quaking	1.07863	0.109206	0.767353	1
sp|P61164|ACTZ_MOUSE	P61164	ACTZ_MOUSE	Actr1a	Alpha-centractin	0.763093	-0.390069	0.767366	1
sp|Q8BND4|DX26B_MOUSE	Q8BND4	DX26B_MOUSE	Ddx26b	Protein DDX26B	1.0786	0.10916	0.76745	1
sp|Q8JZS0|LIN7A_MOUSE	Q8JZS0	LIN7A_MOUSE	Lin7a	Protein lin-7 homolog A	0.763187	-0.389891	0.767738	1
sp|Q8VHX6|FLNC_MOUSE	Q8VHX6	FLNC_MOUSE	Flnc	Filamin-C	0.763216	-0.389836	0.767854	1
sp|Q01147|CREB1_MOUSE	Q01147	CREB1_MOUSE	Creb1	Cyclic AMP-responsive element-binding protein 1	1.07834	0.10881	0.768182	1
sp|Q09XV5|CHD8_MOUSE	Q09XV5	CHD8_MOUSE	Chd8	Chromodomain-helicase-DNA-binding protein 8	1.07783	0.108132	0.769601	1
sp|P19639|GSTM4_MOUSE	P19639	GSTM4_MOUSE	Gstm3	Glutathione S-transferase Mu 3	0.763909	-0.388528	0.77059	1
sp|Q8K3W0|BRE_MOUSE	Q8K3W0	BRE_MOUSE	Bre	BRCA1-A complex subunit BRE	1.07731	0.107432	0.771064	1
sp|Q61937|NPM_MOUSE	Q61937	NPM_MOUSE	Npm1	Nucleophosmin	0.76411	-0.388147	0.771386	1
sp|Q00547|HMMR_MOUSE	Q00547	HMMR_MOUSE	Hmmr	Hyaluronan mediated motility receptor	1.07706	0.107097	0.771765	1
sp|Q8CBY8|DCTN4_MOUSE	Q8CBY8	DCTN4_MOUSE	Dctn4	Dynactin subunit 4	0.764208	-0.387963	0.771769	1
sp|Q71LX4|TLN2_MOUSE	Q71LX4	TLN2_MOUSE	Tln2	Talin-2	1.07697	0.106972	0.772025	1
sp|Q9CR20|IR3IP_MOUSE	Q9CR20	IR3IP_MOUSE	Ier3ip1	Immediate early response 3-interacting protein 1	0.764366	-0.387665	0.772393	1
sp|Q9CQW1|YKT6_MOUSE	Q9CQW1	YKT6_MOUSE	Ykt6	Synaptobrevin homolog YKT6	0.764501	-0.38741	0.772924	1
sp|P57746|VATD_MOUSE	P57746	VATD_MOUSE	Atp6v1d	V-type proton ATPase subunit D	0.764654	-0.387121	0.773528	1
sp|Q61474|MSI1H_MOUSE	Q61474	MSI1H_MOUSE	Msi1	RNA-binding protein Musashi homolog 1	1.07624	0.106005	0.774043	1
sp|Q9JJ80|RPF2_MOUSE	Q9JJ80	RPF2_MOUSE	Rpf2	Ribosome production factor 2 homolog	0.764916	-0.386627	0.774558	1
sp|Q9EPQ8|TCF20_MOUSE	Q9EPQ8	TCF20_MOUSE	Tcf20	Transcription factor 20	1.07586	0.105484	0.775129	1
sp|Q62419|SH3G1_MOUSE	Q62419	SH3G1_MOUSE	Sh3gl1	Endophilin-A2	1.07574	0.10533	0.77545	1
sp|Q921M7|FA49B_MOUSE	Q921M7	FA49B_MOUSE	Fam49b	Protein FAM49B	1.07572	0.105303	0.775505	1
sp|P62858|RS28_MOUSE	P62858	RS28_MOUSE	Rps28	40S ribosomal protein S28	1.07553	0.105052	0.776029	1
sp|Q91YE6|IPO9_MOUSE	Q91YE6	IPO9_MOUSE	Ipo9	Importin-9	0.765481	-0.385561	0.776779	1
sp|Q69Z99|ZN512_MOUSE	Q69Z99	ZN512_MOUSE	Znf512	Zinc finger protein 512	1.07512	0.104501	0.777176	1
sp|Q8R1Q8|DC1L1_MOUSE	Q8R1Q8	DC1L1_MOUSE	Dync1li1	Cytoplasmic dynein 1 light intermediate chain 1	0.765619	-0.385302	0.777317	1
sp|P14404|EVI1_MOUSE	P14404	EVI1_MOUSE	Mecom	MDS1 and EVI1 complex locus protein EVI1	0.765728	-0.385096	0.777747	1
sp|Q8CGA3|LAT4_MOUSE	Q8CGA3	LAT4_MOUSE	Slc43a2	Large neutral amino acids transporter small subunit 4	0.765891	-0.384789	0.778385	1
sp|E9Q634|MYO1E_MOUSE	E9Q634	MYO1E_MOUSE	Myo1e	Unconventional myosin-Ie	0.765951	-0.384675	0.778622	1
sp|P54731|FAF1_MOUSE	P54731	FAF1_MOUSE	Faf1	FAS-associated factor 1	1.07433	0.103438	0.779387	1
sp|Q9D1R9|RL34_MOUSE	Q9D1R9	RL34_MOUSE	Rpl34	60S ribosomal protein L34	0.766288	-0.384041	0.779939	1
sp|O88447|KLC1_MOUSE	O88447	KLC1_MOUSE	Klc1	Kinesin light chain 1	0.76629	-0.384038	0.779946	1
sp|Q9CZU4|ERAL1_MOUSE	Q9CZU4	ERAL1_MOUSE	Eral1	GTPase Era, mitochondrial	1.07407	0.103084	0.780123	1
sp|P30999|CTND1_MOUSE	P30999	CTND1_MOUSE	Ctnnd1	Catenin delta-1	1.07401	0.103008	0.780279	1
sp|Q6GV12|KDSR_MOUSE	Q6GV12	KDSR_MOUSE	Kdsr	3-ketodihydrosphingosine reductase	1.07391	0.102867	0.780573	1
sp|A2AWL7|MGAP_MOUSE	A2AWL7	MGAP_MOUSE	Mga	MAX gene-associated protein	1.07388	0.102834	0.780642	1
sp|Q8K003|TMA7_MOUSE	Q8K003	TMA7_MOUSE	Tma7	Translation machinery-associated protein 7	0.766504	-0.383636	0.780781	1
sp|P62307|RUXF_MOUSE	P62307	RUXF_MOUSE	Snrpf	Small nuclear ribonucleoprotein F	1.07379	0.102715	0.780888	1
sp|Q922H4|GMPPA_MOUSE	Q922H4	GMPPA_MOUSE	Gmppa	Mannose-1-phosphate guanyltransferase alpha	1.07377	0.102686	0.780948	1
tr|Q5XJF6|Q5XJF6_MOUSE	Q5XJF6	Q5XJF6_MOUSE	Rpl10a	Ribosomal protein	0.766661	-0.383339	0.781398	1
sp|A2AF53|T185A_MOUSE	A2AF53	T185A_MOUSE	Tmem185a	Transmembrane protein 185A	0.766667	-0.383328	0.781419	1
sp|E9Q1P8|I2BP2_MOUSE	E9Q1P8	I2BP2_MOUSE	Irf2bp2	Interferon regulatory factor 2-binding protein 2	1.07344	0.102246	0.781861	1
sp|P70371|TERF1_MOUSE	P70371	TERF1_MOUSE	Terf1	Telomeric repeat-binding factor 1	1.07328	0.102028	0.782314	1
sp|Q921L3|TMCO1_MOUSE	Q921L3	TMCO1_MOUSE	Tmco1	Transmembrane and coiled-coil domain-containing protein 1	0.767169	-0.382383	0.783378	1
sp|P16381|DDX3L_MOUSE	P16381	DDX3L_MOUSE	D1Pas1	Putative ATP-dependent RNA helicase Pl10	1.07274	0.101301	0.78382	1
sp|Q9D0K2|SCOT1_MOUSE	Q9D0K2	SCOT1_MOUSE	Oxct1	Succinyl-CoA:3-ketoacid coenzyme A transferase 1, mitochondrial	1.07266	0.101199	0.784032	1
sp|Q91V12|BACH_MOUSE	Q91V12	BACH_MOUSE	Acot7	Cytosolic acyl coenzyme A thioester hydrolase	0.767378	-0.381991	0.78419	1
sp|O35887|CALU_MOUSE	O35887	CALU_MOUSE	Calu	Calumenin	0.767625	-0.381527	0.785151	1
sp|Q6KCD5|NIPBL_MOUSE	Q6KCD5	NIPBL_MOUSE	Nipbl	Nipped-B-like protein	0.767631	-0.381515	0.785177	1
sp|Q60692|PSB6_MOUSE	Q60692	PSB6_MOUSE	Psmb6	Proteasome subunit beta type-6	0.767741	-0.381308	0.785604	1
sp|Q6PR54|RIF1_MOUSE	Q6PR54	RIF1_MOUSE	Rif1	Telomere-associated protein RIF1	1.07199	0.100294	0.785905	1
sp|P16546|SPTN1_MOUSE	P16546	SPTN1_MOUSE	Sptan1	Spectrin alpha chain, non-erythrocytic 1	0.767859	-0.381088	0.786061	1
sp|Q6NZA9|TAF9B_MOUSE	Q6NZA9	TAF9B_MOUSE	Taf9b	Transcription initiation factor TFIID subunit 9B	1.07188	0.100142	0.78622	1
sp|O70152|DPM1_MOUSE	O70152	DPM1_MOUSE	Dpm1	Dolichol-phosphate mannosyltransferase subunit 1	0.768049	-0.380729	0.786802	1
sp|Q60803|TRAF3_MOUSE	Q60803	TRAF3_MOUSE	Traf3	TNF receptor-associated factor 3	0.768254	-0.380345	0.787595	1
sp|Q8BWQ6|CP062_MOUSE	Q8BWQ6	CP062_MOUSE	>sp|Q8BWQ6|CP062_MOUSE	n/a	0.768327	-0.380207	0.787881	1
sp|Q99104|MYO5A_MOUSE	Q99104	MYO5A_MOUSE	Myo5a	Unconventional myosin-Va	1.07125	0.0992934	0.787973	1
sp|Q8R1V4|TMED4_MOUSE	Q8R1V4	TMED4_MOUSE	Tmed4	Transmembrane emp24 domain-containing protein 4	0.768422	-0.380029	0.788248	1
sp|P70362|UFD1_MOUSE	P70362	UFD1_MOUSE	Ufd1l	Ubiquitin fusion degradation protein 1 homolog	1.07089	0.0988091	0.788972	1
sp|Q9CXZ1|NDUS4_MOUSE	Q9CXZ1	NDUS4_MOUSE	Ndufs4	NADH dehydrogenase [ubiquinone] iron-sulfur protein 4, mitochondrial	1.07078	0.0986652	0.789269	1
sp|O08992|SDCB1_MOUSE	O08992	SDCB1_MOUSE	Sdcbp	Syntenin-1	1.07058	0.098388	0.789841	1
sp|Q9QYC0|ADDA_MOUSE	Q9QYC0	ADDA_MOUSE	Add1	Alpha-adducin	0.768933	-0.37907	0.790227	1
sp|Q9QZ88|VPS29_MOUSE	Q9QZ88	VPS29_MOUSE	Vps29	Vacuolar protein sorting-associated protein 29	0.768975	-0.378991	0.790391	1
sp|Q9CZS1|AL1B1_MOUSE	Q9CZS1	AL1B1_MOUSE	Aldh1b1	Aldehyde dehydrogenase X, mitochondrial	1.07031	0.0980272	0.790585	1
tr|B9EJ54|B9EJ54_MOUSE	B9EJ54	B9EJ54_MOUSE	Nup205	MCG21756, isoform CRA_b	0.769062	-0.378828	0.790726	1
sp|Q8K0D0|CDK17_MOUSE	Q8K0D0	CDK17_MOUSE	Cdk17	Cyclin-dependent kinase 17	0.769138	-0.378686	0.791017	1
sp|Q99JI6|RAP1B_MOUSE	Q99JI6	RAP1B_MOUSE	Rap1b	Ras-related protein Rap-1b	0.769515	-0.37798	0.792473	1
sp|Q6P8X1|SNX6_MOUSE	Q6P8X1	SNX6_MOUSE	Snx6	Sorting nexin-6	0.769714	-0.377606	0.793241	1
sp|Q9CR29|CCD43_MOUSE	Q9CR29	CCD43_MOUSE	Ccdc43	Coiled-coil domain-containing protein 43	1.06931	0.0966837	0.793351	1
sp|Q9JLM4|ZMYM3_MOUSE	Q9JLM4	ZMYM3_MOUSE	Zmym3	Zinc finger MYM-type protein 3	0.770101	-0.376881	0.794732	1
sp|Q8R3N1|NOP14_MOUSE	Q8R3N1	NOP14_MOUSE	Nop14	Nucleolar protein 14	0.770141	-0.376805	0.794887	1
sp|Q9CZU6|CISY_MOUSE	Q9CZU6	CISY_MOUSE	Cs	Citrate synthase, mitochondrial	1.06876	0.0959317	0.794896	1
sp|O70566|DIAP2_MOUSE	O70566	DIAP2_MOUSE	Diaph2	Protein diaphanous homolog 2	0.770392	-0.376336	0.795851	1
tr|Q9QUK9|Q9QUK9_MOUSE	Q9QUK9	Q9QUK9_MOUSE	Try5	MCG15083	1.06809	0.0950284	0.796751	1
sp|Q3TL44|NLRX1_MOUSE	Q3TL44	NLRX1_MOUSE	Nlrx1	NLR family member X1	0.770945	-0.375301	0.797974	1
tr|Q8VCQ8|Q8VCQ8_MOUSE	Q8VCQ8	Q8VCQ8_MOUSE	Cald1	Caldesmon 1	0.771288	-0.374658	0.79929	1
sp|P99029|PRDX5_MOUSE	P99029	PRDX5_MOUSE	Prdx5	Peroxiredoxin-5, mitochondrial	0.771538	-0.37419	0.800247	1
sp|Q9WTI7|MYO1C_MOUSE	Q9WTI7	MYO1C_MOUSE	Myo1c	Unconventional myosin-Ic	1.06676	0.0932423	0.800408	1
sp|Q8CIG8|ANM5_MOUSE	Q8CIG8	ANM5_MOUSE	Prmt5	Protein arginine N-methyltransferase 5	0.77188	-0.373551	0.801553	1
sp|Q7TQI3|OTUB1_MOUSE	Q7TQI3	OTUB1_MOUSE	Otub1	Ubiquitin thioesterase OTUB1	1.06634	0.0926712	0.801576	1
sp|P30051|TEAD1_MOUSE	P30051	TEAD1_MOUSE	Tead1	Transcriptional enhancer factor TEF-1	1.06632	0.0926439	0.801631	1
sp|Q8CEI1|BOLA3_MOUSE	Q8CEI1	BOLA3_MOUSE	Bola3	BolA-like protein 3	1.06604	0.0922585	0.802418	1
sp|Q6P5G6|UBXN7_MOUSE	Q6P5G6	UBXN7_MOUSE	Ubxn7	UBX domain-containing protein 7	1.06603	0.0922521	0.802431	1
sp|P41241|CSK_MOUSE	P41241	CSK_MOUSE	Csk	Tyrosine-protein kinase CSK	0.772304	-0.372759	0.80317	1
sp|Q6PD10|IP6K1_MOUSE	Q6PD10	IP6K1_MOUSE	Ip6k1	Inositol hexakisphosphate kinase 1	0.77244	-0.372505	0.803688	1
sp|P70255|NFIC_MOUSE	P70255	NFIC_MOUSE	Nfic	Nuclear factor 1 C-type	0.772581	-0.372242	0.804224	1
sp|P16330|CN37_MOUSE	P16330	CN37_MOUSE	Cnp	2',3'-cyclic-nucleotide 3'-phosphodiesterase	0.772617	-0.372174	0.804362	1
sp|P62751|RL23A_MOUSE	P62751	RL23A_MOUSE	Rpl23a	60S ribosomal protein L23a	0.772944	-0.371564	0.805605	1
sp|Q8VE22|RT23_MOUSE	Q8VE22	RT23_MOUSE	Mrps23	28S ribosomal protein S23, mitochondrial	1.06485	0.0906534	0.80569	1
sp|O55106|STRN_MOUSE	O55106	STRN_MOUSE	Strn	Striatin	0.772971	-0.371513	0.805708	1
sp|Q80T85|DCAF5_MOUSE	Q80T85	DCAF5_MOUSE	Dcaf5	DDB1- and CUL4-associated factor 5	1.06461	0.0903253	0.806358	1
sp|Q91WE6|CDKAL_MOUSE	Q91WE6	CDKAL_MOUSE	Cdkal1	Threonylcarbamoyladenosine tRNA methylthiotransferase	0.773229	-0.371032	0.806687	1
sp|Q8K0C9|GMDS_MOUSE	Q8K0C9	GMDS_MOUSE	Gmds	GDP-mannose 4,6 dehydratase	0.773317	-0.370868	0.80702	1
sp|Q80YA3|DDHD1_MOUSE	Q80YA3	DDHD1_MOUSE	Ddhd1	Phospholipase DDHD1	0.773468	-0.370587	0.807592	1
sp|Q02257|PLAK_MOUSE	Q02257	PLAK_MOUSE	Jup	Junction plakoglobin	0.773482	-0.37056	0.807647	1
sp|O55102|BL1S1_MOUSE	O55102	BL1S1_MOUSE	Bloc1s1	Biogenesis of lysosome-related organelles complex 1 subunit 1	0.773589	-0.37036	0.808053	1
sp|Q99N94|RM09_MOUSE	Q99N94	RM09_MOUSE	Mrpl9	39S ribosomal protein L9, mitochondrial	1.06398	0.0894647	0.808107	1
sp|P46978|STT3A_MOUSE	P46978	STT3A_MOUSE	Stt3a	Dolichyl-diphosphooligosaccharide--protein glycosyltransferase subunit STT3A	0.77378	-0.370005	0.808775	1
sp|O08915|AIP_MOUSE	O08915	AIP_MOUSE	Aip	AH receptor-interacting protein	1.06369	0.0890762	0.808896	1
sp|P59759|MKL2_MOUSE	P59759	MKL2_MOUSE	Mkl2	MKL/myocardin-like protein 2	0.773947	-0.369693	0.809407	1
sp|Q9Z1F9|SAE2_MOUSE	Q9Z1F9	SAE2_MOUSE	Uba2	SUMO-activating enzyme subunit 2	1.06343	0.0887191	0.80962	1
sp|Q9CQ26|STABP_MOUSE	Q9CQ26	STABP_MOUSE	Stambp	STAM-binding protein	0.774026	-0.369547	0.809705	1
sp|P25916|BMI1_MOUSE	P25916	BMI1_MOUSE	Bmi1	Polycomb complex protein BMI-1	0.774372	-0.3689	0.811014	1
sp|Q04447|KCRB_MOUSE	Q04447	KCRB_MOUSE	Ckb	Creatine kinase B-type	1.06284	0.0879285	0.811223	1
sp|Q9D2N9|VP33A_MOUSE	Q9D2N9	VP33A_MOUSE	Vps33a	Vacuolar protein sorting-associated protein 33A	0.774503	-0.368657	0.811506	1
sp|Q9JKR6|HYOU1_MOUSE	Q9JKR6	HYOU1_MOUSE	Hyou1	Hypoxia up-regulated protein 1	0.774619	-0.368442	0.811943	1
sp|Q91YR1|TWF1_MOUSE	Q91YR1	TWF1_MOUSE	Twf1	Twinfilin-1	1.06256	0.0875503	0.811988	1
sp|Q9D358|PPAC_MOUSE	Q9D358	PPAC_MOUSE	Acp1	Low molecular weight phosphotyrosine protein phosphatase	1.06255	0.0875262	0.812037	1
sp|Q7TSS2|UB2Q1_MOUSE	Q7TSS2	UB2Q1_MOUSE	Ube2q1	Ubiquitin-conjugating enzyme E2 Q1	0.774697	-0.368295	0.812239	1
sp|Q922B2|SYDC_MOUSE	Q922B2	SYDC_MOUSE	Dars	Aspartate--tRNA ligase, cytoplasmic	0.774699	-0.368292	0.812247	1
sp|Q6GQT6|SCAP_MOUSE	Q6GQT6	SCAP_MOUSE	Scap	Sterol regulatory element-binding protein cleavage-activating protein	0.774958	-0.36781	0.813221	1
sp|Q9QYI4|DJB12_MOUSE	Q9QYI4	DJB12_MOUSE	Dnajb12	DnaJ homolog subfamily B member 12	0.774968	-0.367792	0.813257	1
sp|Q8QZV7|ASUN_MOUSE	Q8QZV7	ASUN_MOUSE	Asun	Protein asunder homolog	1.0621	0.0869175	0.813268	1
sp|Q4PZA2|ECE1_MOUSE	Q4PZA2	ECE1_MOUSE	Ece1	Endothelin-converting enzyme 1	1.06201	0.0867984	0.813509	1
sp|Q0VEJ0|CEP76_MOUSE	Q0VEJ0	CEP76_MOUSE	Cep76	Centrosomal protein of 76 kDa	1.06201	0.0867972	0.813511	1
sp|P0C872|JMJD7_MOUSE	P0C872	JMJD7_MOUSE	Jmjd7	JmjC domain-containing protein 7	1.06167	0.0863378	0.814439	1
sp|Q9R099|TBL2_MOUSE	Q9R099	TBL2_MOUSE	Tbl2	Transducin beta-like protein 2	0.775306	-0.367163	0.814529	1
sp|Q8BJQ2|UBP1_MOUSE	Q8BJQ2	UBP1_MOUSE	Usp1	Ubiquitin carboxyl-terminal hydrolase 1	1.06154	0.086162	0.814794	1
sp|Q8BVG4|DPP9_MOUSE	Q8BVG4	DPP9_MOUSE	Dpp9	Dipeptidyl peptidase 9	0.775389	-0.367007	0.814842	1
tr|G3X8Y3|G3X8Y3_MOUSE	G3X8Y3	G3X8Y3_MOUSE	Naa15	N-alpha-acetyltransferase 15, NatA auxiliary subunit	0.775464	-0.366867	0.815124	1
sp|P12023|A4_MOUSE	P12023	A4_MOUSE	App	Amyloid beta A4 protein	1.06113	0.0856035	0.815921	1
sp|Q9DB27|MCTS1_MOUSE	Q9DB27	MCTS1_MOUSE	Mcts1	Malignant T-cell-amplified sequence 1	0.775767	-0.366304	0.816261	1
sp|Q9CWU4|CA052_MOUSE	Q9CWU4	CA052_MOUSE	>sp|Q9CWU4|CA052_MOUSE	n/a	1.06061	0.0848963	0.817346	1
sp|P11103|PARP1_MOUSE	P11103	PARP1_MOUSE	Parp1	Poly [ADP-ribose] polymerase 1	1.06054	0.0847999	0.81754	1
sp|Q9QZD9|EIF3I_MOUSE	Q9QZD9	EIF3I_MOUSE	Eif3i	Eukaryotic translation initiation factor 3 subunit I	0.776242	-0.365421	0.818038	1
sp|P70288|HDAC2_MOUSE	P70288	HDAC2_MOUSE	Hdac2	Histone deacetylase 2	0.776424	-0.365083	0.818718	1
sp|Q6PDS3|SARM1_MOUSE	Q6PDS3	SARM1_MOUSE	Sarm1	Sterile alpha and TIR motif-containing protein 1	0.776436	-0.365062	0.818762	1
sp|O35127|C10_MOUSE	O35127	C10_MOUSE	Grcc10	Protein C10	0.77671	-0.364552	0.819787	1
sp|P46735|MYO1B_MOUSE	P46735	MYO1B_MOUSE	Myo1b	Unconventional myosin-Ib	0.776767	-0.364447	0.819998	1
sp|O70251|EF1B_MOUSE	O70251	EF1B_MOUSE	Eef1b	Elongation factor 1-beta	0.776861	-0.364272	0.820349	1
sp|P97370|AT1B3_MOUSE	P97370	AT1B3_MOUSE	Atp1b3	Sodium/potassium-transporting ATPase subunit beta-3	0.776911	-0.364179	0.820534	1
sp|Q9R1J0|NSDHL_MOUSE	Q9R1J0	NSDHL_MOUSE	Nsdhl	Sterol-4-alpha-carboxylate 3-dehydrogenase, decarboxylating	0.776991	-0.364031	0.820832	1
tr|E9Q4P1|E9Q4P1_MOUSE	E9Q4P1	E9Q4P1_MOUSE	Wdfy1	Protein Wdfy1	0.7771	-0.363828	0.82124	1
sp|P48193|41_MOUSE	P48193	41_MOUSE	Epb41	Protein 4.1	0.777126	-0.363779	0.821337	1
sp|Q8K3A9|MEPCE_MOUSE	Q8K3A9	MEPCE_MOUSE	Mepce	7SK snRNA methylphosphate capping enzyme	1.05896	0.0826478	0.821863	1
sp|Q9D020|5NT3A_MOUSE	Q9D020	5NT3A_MOUSE	Nt5c3a	Cytosolic 5'-nucleotidase 3A	1.05863	0.0821953	0.822769	1
sp|P28741|KIF3A_MOUSE	P28741	KIF3A_MOUSE	Kif3a	Kinesin-like protein KIF3A	0.77762	-0.362862	0.823174	1
sp|P02088|HBB1_MOUSE	P02088	HBB1_MOUSE	Hbb-b1	Hemoglobin subunit beta-1	1.05844	0.0819436	0.823273	1
sp|Q3URS9|CCD51_MOUSE	Q3URS9	CCD51_MOUSE	Ccdc51	Coiled-coil domain-containing protein 51	0.777971	-0.362213	0.824474	1
sp|P28271|ACOC_MOUSE	P28271	ACOC_MOUSE	Aco1	Cytoplasmic aconitate hydratase	0.778024	-0.362113	0.824672	1
sp|Q99LX0|PARK7_MOUSE	Q99LX0	PARK7_MOUSE	Park7	Protein DJ-1	0.778105	-0.361963	0.824972	1
sp|Q9Z277|BAZ1B_MOUSE	Q9Z277	BAZ1B_MOUSE	Baz1b	Tyrosine-protein kinase BAZ1B	1.05781	0.081079	0.825002	1
sp|Q61176|ARGI1_MOUSE	Q61176	ARGI1_MOUSE	Arg1	Arginase-1	0.778143	-0.361893	0.825112	1
sp|P83741|WNK1_MOUSE	P83741	WNK1_MOUSE	Wnk1	Serine/threonine-protein kinase WNK1	0.778271	-0.361655	0.825588	1
sp|Q63850|NUP62_MOUSE	Q63850	NUP62_MOUSE	Nup62	Nuclear pore glycoprotein p62	1.05754	0.0807118	0.825736	1
sp|P25425|PO2F1_MOUSE	P25425	PO2F1_MOUSE	Pou2f1	POU domain, class 2, transcription factor 1	0.778372	-0.361469	0.825959	1
tr|F7BE84|F7BE84_MOUSE	F7BE84	F7BE84_MOUSE	Ankrd50	Protein Ankrd50 (Fragment)	0.778441	-0.36134	0.826216	1
tr|E9PWT1|E9PWT1_MOUSE	E9PWT1	E9PWT1_MOUSE	Trrap	Transformation/transcription domain-associated protein	1.05711	0.0801191	0.826918	1
sp|Q6PGF7|EXOC8_MOUSE	Q6PGF7	EXOC8_MOUSE	Exoc8	Exocyst complex component 8	0.77865	-0.360954	0.826986	1
sp|Q8C092|TAF5_MOUSE	Q8C092	TAF5_MOUSE	Taf5	Transcription initiation factor TFIID subunit 5	1.05694	0.0798998	0.827355	1
sp|P61082|UBC12_MOUSE	P61082	UBC12_MOUSE	Ube2m	NEDD8-conjugating enzyme Ubc12	0.778755	-0.360759	0.827374	1
sp|Q6PB93|GALT2_MOUSE	Q6PB93	GALT2_MOUSE	Galnt2	Polypeptide N-acetylgalactosaminyltransferase 2	0.778874	-0.360538	0.827816	1
sp|A2AGT5|CKAP5_MOUSE	A2AGT5	CKAP5_MOUSE	Ckap5	Cytoskeleton-associated protein 5	0.779134	-0.360057	0.828774	1
sp|Q60634|FLOT2_MOUSE	Q60634	FLOT2_MOUSE	Flot2	Flotillin-2	0.779201	-0.359933	0.82902	1
sp|Q9Z0Z3|SKP2_MOUSE	Q9Z0Z3	SKP2_MOUSE	Skp2	S-phase kinase-associated protein 2	1.0563	0.0790232	0.829101	1
sp|Q9D2N4|DTNA_MOUSE	Q9D2N4	DTNA_MOUSE	Dtna	Dystrobrevin alpha	0.779232	-0.359876	0.829134	1
sp|Q6NZJ6|IF4G1_MOUSE	Q6NZJ6	IF4G1_MOUSE	Eif4g1	Eukaryotic translation initiation factor 4 gamma 1	0.779637	-0.359125	0.830625	1
sp|Q60902|EP15R_MOUSE	Q60902	EP15R_MOUSE	Eps15l1	Epidermal growth factor receptor substrate 15-like 1	0.779644	-0.359113	0.830649	1
sp|Q9WV55|VAPA_MOUSE	Q9WV55	VAPA_MOUSE	Vapa	Vesicle-associated membrane protein-associated protein A	0.779665	-0.359074	0.830727	1
sp|P46061|RAGP1_MOUSE	P46061	RAGP1_MOUSE	Rangap1	Ran GTPase-activating protein 1	0.779862	-0.358709	0.83145	1
sp|Q9Z0H3|SNF5_MOUSE	Q9Z0H3	SNF5_MOUSE	Smarcb1	SWI/SNF-related matrix-associated actin-dependent regulator of chromatin subfamily B member 1	1.05509	0.0773594	0.832404	1
sp|Q921E2|RAB31_MOUSE	Q921E2	RAB31_MOUSE	Rab31	Ras-related protein Rab-31	0.780277	-0.357942	0.832972	1
sp|Q8K0E1|KCD15_MOUSE	Q8K0E1	KCD15_MOUSE	Kctd15	BTB/POZ domain-containing protein KCTD15	0.780286	-0.357924	0.833007	1
sp|P63073|IF4E_MOUSE	P63073	IF4E_MOUSE	Eif4e	Eukaryotic translation initiation factor 4E	1.05465	0.0767579	0.833596	1
sp|Q91V64|ISOC1_MOUSE	Q91V64	ISOC1_MOUSE	Isoc1	Isochorismatase domain-containing protein 1	0.780483	-0.357561	0.833726	1
sp|O35083|PLCA_MOUSE	O35083	PLCA_MOUSE	Agpat1	1-acyl-sn-glycerol-3-phosphate acyltransferase alpha	1.05432	0.0763093	0.834483	1
tr|G3UYY4|G3UYY4_MOUSE	G3UYY4	G3UYY4_MOUSE	Ttc6	Protein Ttc6	0.780856	-0.356872	0.835089	1
sp|P50580|PA2G4_MOUSE	P50580	PA2G4_MOUSE	Pa2g4	Proliferation-associated protein 2G4	0.781001	-0.356604	0.835617	1
sp|Q6PF93|PK3C3_MOUSE	Q6PF93	PK3C3_MOUSE	Pik3c3	Phosphatidylinositol 3-kinase catalytic subunit type 3	1.05372	0.0754932	0.836095	1
sp|P47757-2|CAPZB_MOUSE	P47757-2	CAPZB_MOUSE	Capzb	Isoform 2 of F-actin-capping protein subunit beta	1.05365	0.0753891	0.836301	1
sp|P59999|ARPC4_MOUSE	P59999	ARPC4_MOUSE	Arpc4	Actin-related protein 2/3 complex subunit 4	0.781469	-0.355739	0.837325	1
sp|Q99LM2|CK5P3_MOUSE	Q99LM2	CK5P3_MOUSE	Cdk5rap3	CDK5 regulatory subunit-associated protein 3	1.05318	0.0747501	0.837561	1
sp|Q9CWN7|CNO11_MOUSE	Q9CWN7	CNO11_MOUSE	Cnot11	CCR4-NOT transcription complex subunit 11	1.05308	0.0746121	0.837833	1
sp|Q9D864|ARP6_MOUSE	Q9D864	ARP6_MOUSE	Actr6	Actin-related protein 6	1.05281	0.0742485	0.838549	1
sp|Q8K3P5|CNOT6_MOUSE	Q8K3P5	CNOT6_MOUSE	Cnot6	CCR4-NOT transcription complex subunit 6	0.781905	-0.354935	0.838908	1
sp|Q6PER3|MARE3_MOUSE	Q6PER3	MARE3_MOUSE	Mapre3	Microtubule-associated protein RP/EB family member 3	1.05263	0.0739943	0.839049	1
tr|Q8R2K3|Q8R2K3_MOUSE	Q8R2K3	Q8R2K3_MOUSE	Ssbp1	Single-stranded DNA-binding protein	0.781952	-0.354847	0.83908	1
sp|Q811S7|UBIP1_MOUSE	Q811S7	UBIP1_MOUSE	Ubp1	Upstream-binding protein 1	1.05245	0.0737533	0.839523	1
sp|Q8K2F8|LS14A_MOUSE	Q8K2F8	LS14A_MOUSE	Lsm14a	Protein LSM14 homolog A	1.05222	0.073435	0.840148	1
sp|Q3UMR0|ANR27_MOUSE	Q3UMR0	ANR27_MOUSE	Ankrd27	Ankyrin repeat domain-containing protein 27	0.782347	-0.354119	0.840512	1
sp|Q03145|EPHA2_MOUSE	Q03145	EPHA2_MOUSE	Epha2	Ephrin type-A receptor 2	1.05195	0.0730633	0.840878	1
sp|Q80X95|RRAGA_MOUSE	Q80X95	RRAGA_MOUSE	Rraga	Ras-related GTP-binding protein A	1.05185	0.0729261	0.841147	1
sp|Q6A009|LTN1_MOUSE	Q6A009	LTN1_MOUSE	Ltn1	E3 ubiquitin-protein ligase listerin	1.0518	0.0728557	0.841285	1
tr|E9Q1M6|E9Q1M6_MOUSE	E9Q1M6	E9Q1M6_MOUSE	Ankhd1	Protein Ankhd1	0.78259	-0.353672	0.841389	1
sp|Q8K284|TF3C1_MOUSE	Q8K284	TF3C1_MOUSE	Gtf3c1	General transcription factor 3C polypeptide 1	0.782707	-0.353455	0.841814	1
sp|O88685|PRS6A_MOUSE	O88685	PRS6A_MOUSE	Psmc3	26S protease regulatory subunit 6A	0.782816	-0.353256	0.842205	1
sp|A3KMP2|TTC38_MOUSE	A3KMP2	TTC38_MOUSE	Ttc38	Tetratricopeptide repeat protein 38	0.783051	-0.352822	0.843055	1
sp|P48036|ANXA5_MOUSE	P48036	ANXA5_MOUSE	Anxa5	Annexin A5	0.783075	-0.352777	0.843143	1
sp|Q9CWF2|TBB2B_MOUSE	Q9CWF2	TBB2B_MOUSE	Tubb2b	Tubulin beta-2B chain	1.0509	0.0716271	0.843692	1
sp|P25444|RS2_MOUSE	P25444	RS2_MOUSE	Rps2	40S ribosomal protein S2	0.783229	-0.352493	0.843698	1
sp|Q8K400|STXB5_MOUSE	Q8K400	STXB5_MOUSE	Stxbp5	Syntaxin-binding protein 5	1.05087	0.07158	0.843784	1
sp|Q8BKX1|BAIP2_MOUSE	Q8BKX1	BAIP2_MOUSE	Baiap2	Brain-specific angiogenesis inhibitor 1-associated protein 2	0.783336	-0.352296	0.844083	1
sp|O55234|PSB5_MOUSE	O55234	PSB5_MOUSE	Psmb5	Proteasome subunit beta type-5	0.783364	-0.352245	0.844183	1
sp|Q9DCH6|ZFAN6_MOUSE	Q9DCH6	ZFAN6_MOUSE	Zfand6	AN1-type zinc finger protein 6	1.05071	0.0713698	0.844195	1
tr|Q4VA93|Q4VA93_MOUSE	Q4VA93	Q4VA93_MOUSE	Prkca	Protein kinase C	0.783503	-0.351989	0.844683	1
sp|P35235|PTN11_MOUSE	P35235	PTN11_MOUSE	Ptpn11	Tyrosine-protein phosphatase non-receptor type 11	0.783834	-0.351381	0.845871	1
sp|P48774|GSTM5_MOUSE	P48774	GSTM5_MOUSE	Gstm5	Glutathione S-transferase Mu 5	0.783936	-0.351193	0.846237	1
sp|Q8K4X7|PLCD_MOUSE	Q8K4X7	PLCD_MOUSE	Agpat4	1-acyl-sn-glycerol-3-phosphate acyltransferase delta	0.784037	-0.351007	0.846599	1
sp|Q62393|TPD52_MOUSE	Q62393	TPD52_MOUSE	Tpd52	Tumor protein D52	0.784189	-0.350727	0.847146	1
sp|P54726|RD23A_MOUSE	P54726	RD23A_MOUSE	Rad23a	UV excision repair protein RAD23 homolog A	1.04956	0.0697844	0.847288	1
sp|O08550|KMT2B_MOUSE	O08550	KMT2B_MOUSE	Kmt2b	Histone-lysine N-methyltransferase 2B	0.784606	-0.34996	0.848637	1
sp|Q9EP97|SENP3_MOUSE	Q9EP97	SENP3_MOUSE	Senp3	Sentrin-specific protease 3	0.784701	-0.349785	0.848977	1
sp|P28700|RXRA_MOUSE	P28700	RXRA_MOUSE	Rxra	Retinoic acid receptor RXR-alpha	1.04874	0.0686559	0.849482	1
sp|Q3TC46|PATL1_MOUSE	Q3TC46	PATL1_MOUSE	Patl1	Protein PAT1 homolog 1	0.784882	-0.349453	0.849622	1
sp|Q6QD59|SEC20_MOUSE	Q6QD59	SEC20_MOUSE	Bnip1	Vesicle transport protein SEC20	1.04831	0.0680651	0.850629	1
sp|Q8BTZ5|ANR46_MOUSE	Q8BTZ5	ANR46_MOUSE	Ankrd46	Ankyrin repeat domain-containing protein 46	0.785504	-0.34831	0.851839	1
sp|P36916|GNL1_MOUSE	P36916	GNL1_MOUSE	Gnl1	Guanine nucleotide-binding protein-like 1	1.04785	0.0674292	0.851861	1
sp|Q8BKC8|PI4KB_MOUSE	Q8BKC8	PI4KB_MOUSE	Pi4kb	Phosphatidylinositol 4-kinase beta	0.785613	-0.34811	0.852225	1
sp|Q8C729|F126B_MOUSE	Q8C729	F126B_MOUSE	Fam126b	Protein FAM126B	0.785679	-0.347988	0.85246	1
sp|Q9CPV2|APC16_MOUSE	Q9CPV2	APC16_MOUSE	Anapc16	Anaphase-promoting complex subunit 16	0.785719	-0.347915	0.852603	1
sp|Q9JHR7|IDE_MOUSE	Q9JHR7	IDE_MOUSE	Ide	Insulin-degrading enzyme	1.04749	0.0669376	0.852812	1
sp|Q8CFE3|RCOR1_MOUSE	Q8CFE3	RCOR1_MOUSE	Rcor1	REST corepressor 1	1.04737	0.066768	0.85314	1
sp|Q6P9R2|OXSR1_MOUSE	Q6P9R2	OXSR1_MOUSE	Oxsr1	Serine/threonine-protein kinase OSR1	0.785973	-0.347449	0.853503	1
sp|B9EKI3|TMF1_MOUSE	B9EKI3	TMF1_MOUSE	Tmf1	TATA element modulatory factor	1.0468	0.0659809	0.854659	1
sp|Q99N92|RM27_MOUSE	Q99N92	RM27_MOUSE	Mrpl27	39S ribosomal protein L27, mitochondrial	0.786434	-0.346602	0.855137	1
sp|Q8BYC6|TAOK3_MOUSE	Q8BYC6	TAOK3_MOUSE	Taok3	Serine/threonine-protein kinase TAO3	0.786444	-0.346584	0.855171	1
sp|Q99ME9|NOG1_MOUSE	Q99ME9	NOG1_MOUSE	Gtpbp4	Nucleolar GTP-binding protein 1	0.786481	-0.346517	0.855301	1
sp|Q9R0P9|UCHL1_MOUSE	Q9R0P9	UCHL1_MOUSE	Uchl1	Ubiquitin carboxyl-terminal hydrolase isozyme L1	0.786655	-0.346197	0.855918	1
sp|Q3THS6|METK2_MOUSE	Q3THS6	METK2_MOUSE	Mat2a	S-adenosylmethionine synthase isoform type-2	1.04629	0.065285	0.856	1
sp|Q91YP3|DEOC_MOUSE	Q91YP3	DEOC_MOUSE	Dera	Putative deoxyribose-phosphate aldolase	1.04625	0.0652254	0.856115	1
sp|Q8BLN5|ERG7_MOUSE	Q8BLN5	ERG7_MOUSE	Lss	Lanosterol synthase	1.0462	0.0651561	0.856248	1
sp|P99027|RLA2_MOUSE	P99027	RLA2_MOUSE	Rplp2	60S acidic ribosomal protein P2	0.786751	-0.346021	0.856257	1
tr|Q3ULL6|Q3ULL6_MOUSE	Q3ULL6	Q3ULL6_MOUSE	Upf3b	Protein Upf3b	0.786891	-0.345764	0.856751	1
sp|Q6PGC1|DHX29_MOUSE	Q6PGC1	DHX29_MOUSE	Dhx29	ATP-dependent RNA helicase Dhx29	0.787046	-0.345481	0.857295	1
sp|Q04735|CDK16_MOUSE	Q04735	CDK16_MOUSE	Cdk16	Cyclin-dependent kinase 16	0.787116	-0.345351	0.857544	1
sp|Q8K4Z3|NNRE_MOUSE	Q8K4Z3	NNRE_MOUSE	Apoa1bp	NAD(P)H-hydrate epimerase	0.787151	-0.345288	0.857665	1
sp|Q6XUX1|DUSTY_MOUSE	Q6XUX1	DUSTY_MOUSE	Dstyk	Dual serine/threonine and tyrosine protein kinase	0.787354	-0.344916	0.858379	1
sp|A6H5Y3|METH_MOUSE	A6H5Y3	METH_MOUSE	Mtr	Methionine synthase	0.787354	-0.344916	0.85838	1
sp|P35980|RL18_MOUSE	P35980	RL18_MOUSE	Rpl18	60S ribosomal protein L18	0.787486	-0.344674	0.858845	1
sp|O35704|SPTC1_MOUSE	O35704	SPTC1_MOUSE	Sptlc1	Serine palmitoyltransferase 1	0.787488	-0.34467	0.858851	1
sp|Q99LD8|DDAH2_MOUSE	Q99LD8	DDAH2_MOUSE	Ddah2	N(G),N(G)-dimethylarginine dimethylaminohydrolase 2	1.04499	0.0634888	0.85945	1
sp|P80315|TCPD_MOUSE	P80315	TCPD_MOUSE	Cct4	T-complex protein 1 subunit delta	0.787661	-0.344353	0.85946	1
sp|Q9CQ71|RFA3_MOUSE	Q9CQ71	RFA3_MOUSE	Rpa3	Replication protein A 14 kDa subunit	1.04493	0.0634043	0.859612	1
sp|Q921W4|QORL1_MOUSE	Q921W4	QORL1_MOUSE	Cryzl1	Quinone oxidoreductase-like protein 1	0.787729	-0.344229	0.859697	1
sp|Q9ERD6|RGPS2_MOUSE	Q9ERD6	RGPS2_MOUSE	Ralgps2	Ras-specific guanine nucleotide-releasing factor RalGPS2	0.787773	-0.344147	0.859853	1
sp|Q60605|MYL6_MOUSE	Q60605	MYL6_MOUSE	Myl6	Myosin light polypeptide 6	1.04467	0.0630461	0.860298	1
sp|Q99K85|SERC_MOUSE	Q99K85	SERC_MOUSE	Psat1	Phosphoserine aminotransferase	0.787948	-0.343827	0.860466	1
sp|Q9DBG3|AP2B1_MOUSE	Q9DBG3	AP2B1_MOUSE	Ap2b1	AP-2 complex subunit beta	0.788073	-0.343598	0.860904	1
sp|P09103|PDIA1_MOUSE	P09103	PDIA1_MOUSE	P4hb	Protein disulfide-isomerase	0.788201	-0.343364	0.861351	1
sp|O70274|TP4A2_MOUSE	O70274	TP4A2_MOUSE	Ptp4a2	Protein tyrosine phosphatase type IVA 2	0.788325	-0.343137	0.861785	1
tr|E9Q9V7|E9Q9V7_MOUSE	E9Q9V7	E9Q9V7_MOUSE	Srcap	Protein Srcap	0.788333	-0.343123	0.861812	1
sp|Q99PT1|GDIR1_MOUSE	Q99PT1	GDIR1_MOUSE	Arhgdia	Rho GDP-dissociation inhibitor 1	0.788423	-0.342957	0.862128	1
sp|Q8BL48|UNK_MOUSE	Q8BL48	UNK_MOUSE	Unk	RING finger protein unkempt homolog	0.788637	-0.342567	0.862873	1
sp|Q3UQ84|SYTM_MOUSE	Q3UQ84	SYTM_MOUSE	Tars2	Threonine--tRNA ligase, mitochondrial	1.04361	0.0615823	0.863094	1
sp|Q9QXZ0|MACF1_MOUSE	Q9QXZ0	MACF1_MOUSE	Macf1	Microtubule-actin cross-linking factor 1	1.04316	0.0609658	0.864268	1
sp|Q8R3Y8|I2BP1_MOUSE	Q8R3Y8	I2BP1_MOUSE	Irf2bp1	Interferon regulatory factor 2-binding protein 1	0.789138	-0.341651	0.864618	1
sp|Q99KF1|TMED9_MOUSE	Q99KF1	TMED9_MOUSE	Tmed9	Transmembrane emp24 domain-containing protein 9	0.789358	-0.341248	0.865384	1
sp|Q8BJ03|COX15_MOUSE	Q8BJ03	COX15_MOUSE	Cox15	Cytochrome c oxidase assembly protein COX15 homolog	1.04271	0.0603345	0.865468	1
sp|Q9CQN7|RM41_MOUSE	Q9CQN7	RM41_MOUSE	Mrpl41	39S ribosomal protein L41, mitochondrial	1.04261	0.060196	0.865731	1
sp|Q91YM2|RHG35_MOUSE	Q91YM2	RHG35_MOUSE	Arhgap35	Rho GTPase-activating protein 35	0.789683	-0.340655	0.866509	1
tr|E9Q8V6|E9Q8V6_MOUSE	E9Q8V6	E9Q8V6_MOUSE	Dennd4a	Protein Dennd4a	0.789745	-0.340541	0.866726	1
sp|P26041|MOES_MOUSE	P26041	MOES_MOUSE	Msn	Moesin	0.789747	-0.340537	0.866732	1
sp|Q8BK64|AHSA1_MOUSE	Q8BK64	AHSA1_MOUSE	Ahsa1	Activator of 90 kDa heat shock protein ATPase homolog 1	1.04219	0.0596213	0.866821	1
sp|P48678|LMNA_MOUSE	P48678	LMNA_MOUSE	Lmna	Prelamin-A/C	1.04214	0.0595437	0.866969	1
sp|P14873|MAP1B_MOUSE	P14873	MAP1B_MOUSE	Map1b	Microtubule-associated protein 1B	0.789843	-0.340362	0.867065	1
sp|Q8BU30|SYIC_MOUSE	Q8BU30	SYIC_MOUSE	Iars	Isoleucine--tRNA ligase, cytoplasmic	0.789877	-0.3403	0.867183	1
sp|P20615|HXB9_MOUSE	P20615	HXB9_MOUSE	Hoxb9	Homeobox protein Hox-B9	0.789912	-0.340237	0.867302	1
sp|Q64511|TOP2B_MOUSE	Q64511	TOP2B_MOUSE	Top2b	DNA topoisomerase 2-beta	1.04186	0.0591558	0.867703	1
sp|Q9JMA2|TGT_MOUSE	Q9JMA2	TGT_MOUSE	Qtrt1	Queuine tRNA-ribosyltransferase	1.04166	0.0588892	0.868208	1
sp|Q9CWU9|NUP37_MOUSE	Q9CWU9	NUP37_MOUSE	Nup37	Nucleoporin Nup37	0.790314	-0.339502	0.868693	1
sp|Q9D1G5|LRC57_MOUSE	Q9D1G5	LRC57_MOUSE	Lrrc57	Leucine-rich repeat-containing protein 57	0.790407	-0.339332	0.869014	1
sp|Q9CX56|PSMD8_MOUSE	Q9CX56	PSMD8_MOUSE	Psmd8	26S proteasome non-ATPase regulatory subunit 8	1.0412	0.058251	0.869414	1
sp|O35465|FKBP8_MOUSE	O35465	FKBP8_MOUSE	Fkbp8	Peptidyl-prolyl cis-trans isomerase FKBP8	0.790661	-0.338869	0.869888	1
tr|E9Q6R7|E9Q6R7_MOUSE	E9Q6R7	E9Q6R7_MOUSE	Utrn	Protein Utrn	0.790685	-0.338824	0.869973	1
sp|Q8R4H2|ARHGC_MOUSE	Q8R4H2	ARHGC_MOUSE	Arhgef12	Rho guanine nucleotide exchange factor 12	0.790693	-0.33881	0.869999	1
sp|Q99LG2|TNPO2_MOUSE	Q99LG2	TNPO2_MOUSE	Tnpo2	Transportin-2	0.790731	-0.338741	0.870129	1
sp|Q9JJ28|FLII_MOUSE	Q9JJ28	FLII_MOUSE	Flii	Protein flightless-1 homolog	0.790791	-0.338632	0.870334	1
sp|Q8BMJ2|SYLC_MOUSE	Q8BMJ2	SYLC_MOUSE	Lars	Leucine--tRNA ligase, cytoplasmic	0.790853	-0.338518	0.87055	1
sp|Q9CWS0|DDAH1_MOUSE	Q9CWS0	DDAH1_MOUSE	Ddah1	N(G),N(G)-dimethylarginine dimethylaminohydrolase 1	0.791194	-0.337897	0.871719	1
sp|Q6PAQ4|REXO4_MOUSE	Q6PAQ4	REXO4_MOUSE	Rexo4	RNA exonuclease 4	0.791195	-0.337895	0.871723	1
sp|P26043|RADI_MOUSE	P26043	RADI_MOUSE	Rdx	Radixin	0.791349	-0.337614	0.872253	1
sp|Q91YJ2|SNX4_MOUSE	Q91YJ2	SNX4_MOUSE	Snx4	Sorting nexin-4	0.79138	-0.337558	0.872358	1
sp|Q8R059|GALE_MOUSE	Q8R059	GALE_MOUSE	Gale	UDP-glucose 4-epimerase	0.791553	-0.337242	0.872951	1
sp|Q3U319|BRE1B_MOUSE	Q3U319	BRE1B_MOUSE	Rnf40	E3 ubiquitin-protein ligase BRE1B	1.03938	0.055722	0.874173	1
sp|Q9JJA2|COG8_MOUSE	Q9JJA2	COG8_MOUSE	Cog8	Conserved oligomeric Golgi complex subunit 8	1.03933	0.0556529	0.874302	1
tr|B2RQC6|B2RQC6_MOUSE	B2RQC6	B2RQC6_MOUSE	Cad	CAD protein	0.792274	-0.335929	0.875412	1
sp|Q5SWD9|TSR1_MOUSE	Q5SWD9	TSR1_MOUSE	Tsr1	Pre-rRNA-processing protein TSR1 homolog	1.0389	0.0550583	0.875416	1
sp|Q9CZX0|ELP3_MOUSE	Q9CZX0	ELP3_MOUSE	Elp3	Elongator complex protein 3	1.03885	0.0549923	0.875539	1
tr|E9PW37|E9PW37_MOUSE	E9PW37	E9PW37_MOUSE	Rasal2	Protein Rasal2	0.792504	-0.33551	0.876197	1
sp|Q8CDN6|TXNL1_MOUSE	Q8CDN6	TXNL1_MOUSE	Txnl1	Thioredoxin-like protein 1	1.03855	0.0545692	0.87633	1
sp|P52196|THTR_MOUSE	P52196	THTR_MOUSE	Tst	Thiosulfate sulfurtransferase	1.03827	0.0541771	0.877062	1
sp|O35071|KIF1C_MOUSE	O35071	KIF1C_MOUSE	Kif1c	Kinesin-like protein KIF1C	0.792899	-0.334791	0.877538	1
sp|Q400C8|AMZ2_MOUSE	Q400C8	AMZ2_MOUSE	Amz2	Archaemetzincin-2	0.792955	-0.33469	0.877727	1
sp|P20029|GRP78_MOUSE	P20029	GRP78_MOUSE	Hspa5	78 kDa glucose-regulated protein	0.793336	-0.333995	0.87902	1
sp|Q9JIF7|COPB_MOUSE	Q9JIF7	COPB_MOUSE	Copb1	Coatomer subunit beta	0.793351	-0.333969	0.879069	1
sp|Q62311|TAF6_MOUSE	Q62311	TAF6_MOUSE	Taf6	Transcription initiation factor TFIID subunit 6	1.03738	0.0529394	0.879368	1
sp|P35276|RAB3D_MOUSE	P35276	RAB3D_MOUSE	Rab3d	Ras-related protein Rab-3D	1.03714	0.052608	0.879983	1
sp|Q6NS46|RRP5_MOUSE	Q6NS46	RRP5_MOUSE	Pdcd11	Protein RRP5 homolog	0.793686	-0.33336	0.8802	1
sp|Q9WUM3|COR1B_MOUSE	Q9WUM3	COR1B_MOUSE	Coro1b	Coronin-1B	0.793928	-0.332921	0.881016	1
sp|P62821|RAB1A_MOUSE	P62821	RAB1A_MOUSE	Rab1A	Ras-related protein Rab-1A	0.793941	-0.332896	0.881061	1
sp|Q99KD5|UN45A_MOUSE	Q99KD5	UN45A_MOUSE	Unc45a	Protein unc-45 homolog A	0.793942	-0.332895	0.881063	1
sp|P27773|PDIA3_MOUSE	P27773	PDIA3_MOUSE	Pdia3	Protein disulfide-isomerase A3	0.794016	-0.332761	0.881312	1
sp|Q8BN78|KAISO_MOUSE	Q8BN78	KAISO_MOUSE	Zbtb33	Transcriptional regulator Kaiso	0.794204	-0.332419	0.881945	1
sp|Q91WK2|EIF3H_MOUSE	Q91WK2	EIF3H_MOUSE	Eif3h	Eukaryotic translation initiation factor 3 subunit H	1.03627	0.0514031	0.882217	1
sp|P16254|SRP14_MOUSE	P16254	SRP14_MOUSE	Srp14	Signal recognition particle 14 kDa protein	0.794306	-0.332233	0.882289	1
sp|Q9QZB7|ARP10_MOUSE	Q9QZB7	ARP10_MOUSE	Actr10	Actin-related protein 10	0.794319	-0.33221	0.882331	1
sp|Q6ZQI3|MLEC_MOUSE	Q6ZQI3	MLEC_MOUSE	Mlec	Malectin	0.794443	-0.331984	0.882749	1
sp|Q8CCA0|DCNL4_MOUSE	Q8CCA0	DCNL4_MOUSE	Dcun1d4	DCN1-like protein 4	0.794486	-0.331907	0.882892	1
sp|Q99JX3|GORS2_MOUSE	Q99JX3	GORS2_MOUSE	Gorasp2	Golgi reassembly-stacking protein 2	0.794531	-0.331824	0.883045	1
sp|Q61879|MYH10_MOUSE	Q61879	MYH10_MOUSE	Myh10	Myosin-10	0.794756	-0.331416	0.883799	1
sp|D3YZP9|CCDC6_MOUSE	D3YZP9	CCDC6_MOUSE	Ccdc6	Coiled-coil domain-containing protein 6	1.03552	0.0503618	0.88414	1
sp|Q6NSQ7|LTV1_MOUSE	Q6NSQ7	LTV1_MOUSE	Ltv1	Protein LTV1 homolog	0.794867	-0.331215	0.88417	1
sp|P58269|DPF3_MOUSE	P58269	DPF3_MOUSE	Dpf3	Zinc finger protein DPF3	1.03539	0.0501759	0.884483	1
sp|Q8BFZ9|ERLN2_MOUSE	Q8BFZ9	ERLN2_MOUSE	Erlin2	Erlin-2	0.795073	-0.330841	0.88486	1
sp|Q9CQU0|TXD12_MOUSE	Q9CQU0	TXD12_MOUSE	Txndc12	Thioredoxin domain-containing protein 12	0.795145	-0.33071	0.8851	1
sp|Q9JJI8|RL38_MOUSE	Q9JJI8	RL38_MOUSE	Rpl38	60S ribosomal protein L38	0.795189	-0.330631	0.885246	1
tr|Q9D3J3|Q9D3J3_MOUSE	Q9D3J3	Q9D3J3_MOUSE	Bcl2l12	BCL2-like 12 (Proline rich), isoform CRA_b	1.03504	0.0496832	0.88539	1
sp|Q8C7V3|UTP15_MOUSE	Q8C7V3	UTP15_MOUSE	Utp15	U3 small nucleolar RNA-associated protein 15 homolog	0.79524	-0.330538	0.885416	1
sp|Q922M7|ASHWN_MOUSE	Q922M7	ASHWN_MOUSE	>sp|Q922M7|ASHWN_MOUSE	n/a	1.03501	0.0496504	0.885451	1
sp|Q7TPH6|MYCB2_MOUSE	Q7TPH6	MYCB2_MOUSE	Mycbp2	E3 ubiquitin-protein ligase MYCBP2	1.03497	0.0495905	0.885561	1
sp|O88544|CSN4_MOUSE	O88544	CSN4_MOUSE	Cops4	COP9 signalosome complex subunit 4	1.03477	0.0493095	0.886078	1
sp|Q6KAR6|EXOC3_MOUSE	Q6KAR6	EXOC3_MOUSE	Exoc3	Exocyst complex component 3	0.79556	-0.329958	0.886483	1
sp|Q3TJZ6|FA98A_MOUSE	Q3TJZ6	FA98A_MOUSE	Fam98a	Protein FAM98A	1.03453	0.0489808	0.886682	1
sp|Q8VI75|IPO4_MOUSE	Q8VI75	IPO4_MOUSE	Ipo4	Importin-4	0.795657	-0.329781	0.886807	1
sp|Q3U7R1|ESYT1_MOUSE	Q3U7R1	ESYT1_MOUSE	Esyt1	Extended synaptotagmin-1	1.03447	0.0488936	0.886842	1
sp|Q9DC16|ERGI1_MOUSE	Q9DC16	ERGI1_MOUSE	Ergic1	Endoplasmic reticulum-Golgi intermediate compartment protein 1	0.795877	-0.329382	0.887539	1
sp|Q9QUI0|RHOA_MOUSE	Q9QUI0	RHOA_MOUSE	Rhoa	Transforming protein RhoA	0.795914	-0.329315	0.887663	1
sp|Q9JI44|DMAP1_MOUSE	Q9JI44	DMAP1_MOUSE	Dmap1	DNA methyltransferase 1-associated protein 1	1.03408	0.0483413	0.887855	1
sp|O08579|EMD_MOUSE	O08579	EMD_MOUSE	Emd	Emerin	0.796218	-0.328765	0.88867	1
sp|Q61102|ABCB7_MOUSE	Q61102	ABCB7_MOUSE	Abcb7	ATP-binding cassette sub-family B member 7, mitochondrial	1.03364	0.047735	0.888964	1
sp|Q01279|EGFR_MOUSE	Q01279	EGFR_MOUSE	Egfr	Epidermal growth factor receptor	0.796402	-0.328431	0.889281	1
sp|Q8JZZ6|AMERL_MOUSE	Q8JZZ6	AMERL_MOUSE	Ammecr1l	AMMECR1-like protein	1.03328	0.0472325	0.889882	1
sp|Q9Z2H5|E41L1_MOUSE	Q9Z2H5	E41L1_MOUSE	Epb41l1	Band 4.1-like protein 1	0.796597	-0.328077	0.889927	1
sp|Q8K3I9|GLCI1_MOUSE	Q8K3I9	GLCI1_MOUSE	Glcci1	Glucocorticoid-induced transcript 1 protein	1.03319	0.047111	0.890104	1
sp|P51410|RL9_MOUSE	P51410	RL9_MOUSE	Rpl9	60S ribosomal protein L9	0.796762	-0.32778	0.890469	1
sp|Q3V0K9|PLSI_MOUSE	Q3V0K9	PLSI_MOUSE	Pls1	Plastin-1	0.796855	-0.327611	0.890776	1
sp|Q9ET54|PALLD_MOUSE	Q9ET54	PALLD_MOUSE	Palld	Palladin	1.03288	0.0466781	0.890894	1
sp|Q9DD02|HIKES_MOUSE	Q9DD02	HIKES_MOUSE	L7rn6	Protein Hikeshi	1.03285	0.0466295	0.890982	1
sp|P68433|H31_MOUSE	P68433	H31_MOUSE	Hist1h3a	Histone H3.1	0.796978	-0.327388	0.891183	1
sp|P45376|ALDR_MOUSE	P45376	ALDR_MOUSE	Akr1b1	Aldose reductase	0.797074	-0.327215	0.891499	1
sp|Q9ES56|TPPC4_MOUSE	Q9ES56	TPPC4_MOUSE	Trappc4	Trafficking protein particle complex subunit 4	0.797172	-0.327038	0.891821	1
sp|Q3TPE9|ANKY2_MOUSE	Q3TPE9	ANKY2_MOUSE	Ankmy2	Ankyrin repeat and MYND domain-containing protein 2	0.797186	-0.327011	0.891869	1
sp|Q8BGC0|HTSF1_MOUSE	Q8BGC0	HTSF1_MOUSE	Htatsf1	HIV Tat-specific factor 1 homolog	1.03223	0.0457693	0.892548	1
sp|Q9JMG1|EDF1_MOUSE	Q9JMG1	EDF1_MOUSE	Edf1	Endothelial differentiation-related factor 1	0.797397	-0.32663	0.892563	1
sp|Q5SSL4|ABR_MOUSE	Q5SSL4	ABR_MOUSE	Abr	Active breakpoint cluster region-related protein	0.797448	-0.326537	0.892731	1
sp|P62746|RHOB_MOUSE	P62746	RHOB_MOUSE	Rhob	Rho-related GTP-binding protein RhoB	0.797473	-0.326492	0.892814	1
sp|P99024|TBB5_MOUSE	P99024	TBB5_MOUSE	Tubb5	Tubulin beta-5 chain	0.797629	-0.32621	0.893325	1
sp|Q80U72|SCRIB_MOUSE	Q80U72	SCRIB_MOUSE	Scrib	Protein scribble homolog	0.797657	-0.326159	0.893417	1
tr|E9Q8G3|E9Q8G3_MOUSE	E9Q8G3	E9Q8G3_MOUSE	Srcap	Protein Srcap	0.798078	-0.325399	0.894794	1
sp|P30412|PPIC_MOUSE	P30412	PPIC_MOUSE	Ppic	Peptidyl-prolyl cis-trans isomerase C	0.798119	-0.325325	0.894929	1
sp|Q3UA06|PCH2_MOUSE	Q3UA06	PCH2_MOUSE	Trip13	Pachytene checkpoint protein 2 homolog	1.03115	0.0442551	0.895292	1
sp|Q8VD65|PI3R4_MOUSE	Q8VD65	PI3R4_MOUSE	Pik3r4	Phosphoinositide 3-kinase regulatory subunit 4	1.03102	0.0440691	0.895628	1
sp|O88738|BIRC6_MOUSE	O88738	BIRC6_MOUSE	Birc6	Baculoviral IAP repeat-containing protein 6	0.798358	-0.324892	0.895711	1
sp|Q9QZ08|NAGK_MOUSE	Q9QZ08	NAGK_MOUSE	Nagk	N-acetyl-D-glucosamine kinase	1.03092	0.0439375	0.895865	1
sp|P09055|ITB1_MOUSE	P09055	ITB1_MOUSE	Itgb1	Integrin beta-1	1.03064	0.0435442	0.896575	1
sp|Q62465|VAT1_MOUSE	Q62465	VAT1_MOUSE	Vat1	Synaptic vesicle membrane protein VAT-1 homolog	0.798756	-0.324173	0.897009	1
sp|P20152|VIME_MOUSE	P20152	VIME_MOUSE	Vim	Vimentin	0.798949	-0.323825	0.897635	1
sp|Q8JZM0|TFB1M_MOUSE	Q8JZM0	TFB1M_MOUSE	Tfb1m	Dimethyladenosine transferase 1, mitochondrial	1.02974	0.0422783	0.898853	1
sp|Q9R1P1|PSB3_MOUSE	Q9R1P1	PSB3_MOUSE	Psmb3	Proteasome subunit beta type-3	0.799337	-0.323124	0.898895	1
sp|Q7TQE6|MACOI_MOUSE	Q7TQE6	MACOI_MOUSE	Tmem57	Macoilin	1.02939	0.0417943	0.899721	1
sp|Q61753|SERA_MOUSE	Q61753	SERA_MOUSE	Phgdh	D-3-phosphoglycerate dehydrogenase	0.799604	-0.322642	0.899759	1
sp|Q921Y2|IMP3_MOUSE	Q921Y2	IMP3_MOUSE	Imp3	U3 small nucleolar ribonucleoprotein protein IMP3	0.799836	-0.322224	0.900508	1
sp|Q9Z2C4|MTMR1_MOUSE	Q9Z2C4	MTMR1_MOUSE	Mtmr1	Myotubularin-related protein 1	0.799845	-0.322207	0.900538	1
sp|P32020|NLTP_MOUSE	P32020	NLTP_MOUSE	Scp2	Non-specific lipid-transfer protein	0.799891	-0.322124	0.900687	1
sp|Q6NZM9|HDAC4_MOUSE	Q6NZM9	HDAC4_MOUSE	Hdac4	Histone deacetylase 4	0.79991	-0.32209	0.900748	1
sp|Q8CI70|LRC20_MOUSE	Q8CI70	LRC20_MOUSE	Lrrc20	Leucine-rich repeat-containing protein 20	0.800002	-0.321924	0.901045	1
sp|Q80X50|UBP2L_MOUSE	Q80X50	UBP2L_MOUSE	Ubap2l	Ubiquitin-associated protein 2-like	0.800035	-0.321865	0.90115	1
sp|Q6ZQK5|ACAP2_MOUSE	Q6ZQK5	ACAP2_MOUSE	Acap2	Arf-GAP with coiled-coil, ANK repeat and PH domain-containing protein 2	1.02877	0.0409209	0.901284	1
sp|P22892|AP1G1_MOUSE	P22892	AP1G1_MOUSE	Ap1g1	AP-1 complex subunit gamma-1	0.800094	-0.321759	0.901339	1
sp|Q62158|TRI27_MOUSE	Q62158	TRI27_MOUSE	Trim27	Zinc finger protein RFP	1.02873	0.0408582	0.901396	1
sp|Q8K301|DDX52_MOUSE	Q8K301	DDX52_MOUSE	Ddx52	Probable ATP-dependent RNA helicase DDX52	0.800172	-0.321617	0.901593	1
sp|Q63829|COMD3_MOUSE	Q63829	COMD3_MOUSE	Commd3	COMM domain-containing protein 3	1.02826	0.0402036	0.902564	1
sp|Q3UHD6|SNX27_MOUSE	Q3UHD6	SNX27_MOUSE	Snx27	Sorting nexin-27	0.800519	-0.320992	0.902708	1
sp|O08738|CASP6_MOUSE	O08738	CASP6_MOUSE	Casp6	Caspase-6	0.800628	-0.320796	0.903057	1
sp|P14152|MDHC_MOUSE	P14152	MDHC_MOUSE	Mdh1	Malate dehydrogenase, cytoplasmic	1.02795	0.0397645	0.903347	1
tr|Q8K119|Q8K119_MOUSE	Q8K119	Q8K119_MOUSE	Pms1	Postmeiotic segregation increased 1 (S. cerevisiae)	0.801114	-0.319921	0.904613	1
sp|Q9ER39|TOR1A_MOUSE	Q9ER39	TOR1A_MOUSE	Tor1a	Torsin-1A	1.02725	0.0387873	0.905083	1
sp|Q9JHI7|EXOS9_MOUSE	Q9JHI7	EXOS9_MOUSE	Exosc9	Exosome complex component RRP45	1.02716	0.0386592	0.90531	1
sp|Q9WU28|PFD5_MOUSE	Q9WU28	PFD5_MOUSE	Pfdn5	Prefoldin subunit 5	0.801363	-0.319473	0.905408	1
sp|Q920E5|FPPS_MOUSE	Q920E5	FPPS_MOUSE	Fdps	Farnesyl pyrophosphate synthase	0.801426	-0.31936	0.905608	1
sp|Q9JJV2|PROF2_MOUSE	Q9JJV2	PROF2_MOUSE	Pfn2	Profilin-2	0.801446	-0.319322	0.905675	1
sp|O09044|SNP23_MOUSE	O09044	SNP23_MOUSE	Snap23	Synaptosomal-associated protein 23	0.801521	-0.319188	0.905913	1
sp|Q8CG70|P3H3_MOUSE	Q8CG70	P3H3_MOUSE	Leprel2	Prolyl 3-hydroxylase 3	0.801681	-0.318901	0.906421	1
sp|Q6PEV3|WIPF2_MOUSE	Q6PEV3	WIPF2_MOUSE	Wipf2	WAS/WASL-interacting protein family member 2	1.02646	0.0376834	0.907036	1
sp|Q9QZQ1-2|AFAD_MOUSE	Q9QZQ1-2	AFAD_MOUSE	Mllt4	Isoform 1 of Afadin	0.801893	-0.318519	0.907096	1
sp|Q8VHE0|SEC63_MOUSE	Q8VHE0	SEC63_MOUSE	Sec63	Translocation protein SEC63 homolog	0.80206	-0.318218	0.907627	1
sp|Q7TMM9|TBB2A_MOUSE	Q7TMM9	TBB2A_MOUSE	Tubb2a	Tubulin beta-2A chain	0.80217	-0.318021	0.907975	1
sp|Q6P9R1|DDX51_MOUSE	Q6P9R1	DDX51_MOUSE	Ddx51	ATP-dependent RNA helicase DDX51	0.802459	-0.317501	0.90889	1
sp|Q9Z1Z0|USO1_MOUSE	Q9Z1Z0	USO1_MOUSE	Uso1	General vesicular transport factor p115	0.802471	-0.31748	0.908927	1
sp|P42208|SEPT2_MOUSE	P42208	SEPT2_MOUSE	42249	Septin-2	1.02553	0.0363736	0.909344	1
sp|P52479|UBP10_MOUSE	P52479	UBP10_MOUSE	Usp10	Ubiquitin carboxyl-terminal hydrolase 10	0.80264	-0.317175	0.909463	1
sp|Q99KN2|CIAO1_MOUSE	Q99KN2	CIAO1_MOUSE	Ciao1	Probable cytosolic iron-sulfur protein assembly protein CIAO1	1.02521	0.0359176	0.910145	1
sp|Q9QYB1|CLIC4_MOUSE	Q9QYB1	CLIC4_MOUSE	Clic4	Chloride intracellular channel protein 4	1.02501	0.0356399	0.910632	1
tr|E9PVA8|E9PVA8_MOUSE	E9PVA8	E9PVA8_MOUSE	Gcn1l1	Protein Gcn1l1	0.803076	-0.316392	0.910837	1
sp|Q8BWG8|ARRB1_MOUSE	Q8BWG8	ARRB1_MOUSE	Arrb1	Beta-arrestin-1	0.803081	-0.316382	0.910854	1
sp|Q921X6|RPC6_MOUSE	Q921X6	RPC6_MOUSE	Polr3f	DNA-directed RNA polymerase III subunit RPC6	0.803186	-0.316194	0.911183	1
sp|P62702|RS4X_MOUSE	P62702	RS4X_MOUSE	Rps4x	40S ribosomal protein S4, X isoform	1.02472	0.0352337	0.911343	1
sp|Q8K4I3|ARHG6_MOUSE	Q8K4I3	ARHG6_MOUSE	Arhgef6	Rho guanine nucleotide exchange factor 6	1.02472	0.0352288	0.911352	1
tr|Q68FG2|Q68FG2_MOUSE	Q68FG2	Q68FG2_MOUSE	Sptbn2	Protein Sptbn2	0.803308	-0.315975	0.911567	1
sp|P11983|TCPA_MOUSE	P11983	TCPA_MOUSE	Tcp1	T-complex protein 1 subunit alpha	0.803382	-0.315841	0.911801	1
sp|Q923G2|RPAB3_MOUSE	Q923G2	RPAB3_MOUSE	Polr2h	DNA-directed RNA polymerases I, II, and III subunit RPABC3	1.0245	0.034926	0.911882	1
sp|Q8CE96|TRM6_MOUSE	Q8CE96	TRM6_MOUSE	Trmt6	tRNA (adenine(58)-N(1))-methyltransferase non-catalytic subunit TRM6	1.0245	0.0349227	0.911887	1
sp|Q80X41|VRK1_MOUSE	Q80X41	VRK1_MOUSE	Vrk1	Serine/threonine-protein kinase VRK1	1.02426	0.0345792	0.912488	1
tr|Q3TMX5|Q3TMX5_MOUSE	Q3TMX5	Q3TMX5_MOUSE	Manf	Arginine-rich, mutated in early stage tumors, isoform CRA_b	0.803727	-0.315222	0.912883	1
sp|P47962|RL5_MOUSE	P47962	RL5_MOUSE	Rpl5	60S ribosomal protein L5	0.803764	-0.315157	0.912996	1
sp|P62869|ELOB_MOUSE	P62869	ELOB_MOUSE	Tceb2	Transcription elongation factor B polypeptide 2	0.803811	-0.315072	0.913145	1
sp|Q9Z2U1|PSA5_MOUSE	Q9Z2U1	PSA5_MOUSE	Psma5	Proteasome subunit alpha type-5	1.02399	0.034196	0.913156	1
sp|Q61699|HS105_MOUSE	Q61699	HS105_MOUSE	Hsph1	Heat shock protein 105 kDa	0.803873	-0.31496	0.913339	1
sp|Q8C1B7|SEP11_MOUSE	Q8C1B7	SEP11_MOUSE	42258	Septin-11	0.803969	-0.314788	0.913639	1
sp|P80317|TCPZ_MOUSE	P80317	TCPZ_MOUSE	Cct6a	T-complex protein 1 subunit zeta	1.02373	0.0338332	0.913788	1
sp|Q8VDZ4|ZDHC5_MOUSE	Q8VDZ4	ZDHC5_MOUSE	Zdhhc5	Palmitoyltransferase ZDHHC5	1.02358	0.0336208	0.914158	1
sp|Q91YQ1|RAB7L_MOUSE	Q91YQ1	RAB7L_MOUSE	Rab29	Ras-related protein Rab-7L1	0.804263	-0.31426	0.914557	1
sp|Q9D8P4|RM17_MOUSE	Q9D8P4	RM17_MOUSE	Mrpl17	39S ribosomal protein L17, mitochondrial	0.804495	-0.313844	0.915279	1
tr|Q8R2T7|Q8R2T7_MOUSE	Q8R2T7	Q8R2T7_MOUSE	Osbpl10	Oxysterol-binding protein	1.02309	0.0329282	0.915361	1
sp|Q9DBB4|NAA16_MOUSE	Q9DBB4	NAA16_MOUSE	Naa16	N-alpha-acetyltransferase 16, NatA auxiliary subunit	0.804633	-0.313598	0.915706	1
sp|Q61187|TS101_MOUSE	Q61187	TS101_MOUSE	Tsg101	Tumor susceptibility gene 101 protein	0.804692	-0.313492	0.915891	1
sp|P08030|APT_MOUSE	P08030	APT_MOUSE	Aprt	Adenine phosphoribosyltransferase	1.02284	0.0325844	0.915957	1
sp|P07901|HS90A_MOUSE	P07901	HS90A_MOUSE	Hsp90aa1	Heat shock protein HSP 90-alpha	1.02282	0.0325571	0.916004	1
sp|Q9QZX7|SRR_MOUSE	Q9QZX7	SRR_MOUSE	Srr	Serine racemase	0.805096	-0.312767	0.917145	1
sp|P18242|CATD_MOUSE	P18242	CATD_MOUSE	Ctsd	Cathepsin D	1.02232	0.031841	0.917243	1
sp|Q8VBZ3|CLPT1_MOUSE	Q8VBZ3	CLPT1_MOUSE	Clptm1	Cleft lip and palate transmembrane protein 1 homolog	0.805335	-0.312339	0.917883	1
sp|Q8BGA5|KRR1_MOUSE	Q8BGA5	KRR1_MOUSE	Krr1	KRR1 small subunit processome component homolog	0.805434	-0.312161	0.91819	1
sp|Q61646|HPT_MOUSE	Q61646	HPT_MOUSE	Hp	Haptoglobin	0.805602	-0.311861	0.918707	1
sp|Q8R3S6|EXOC1_MOUSE	Q8R3S6	EXOC1_MOUSE	Exoc1	Exocyst complex component 1	0.805662	-0.311753	0.918893	1
sp|P17182|ENOA_MOUSE	P17182	ENOA_MOUSE	Eno1	Alpha-enolase	1.02157	0.0307846	0.919064	1
sp|P80314|TCPB_MOUSE	P80314	TCPB_MOUSE	Cct2	T-complex protein 1 subunit beta	1.02153	0.0307329	0.919153	1
sp|Q8QZS1|HIBCH_MOUSE	Q8QZS1	HIBCH_MOUSE	Hibch	3-hydroxyisobutyryl-CoA hydrolase, mitochondrial	1.02143	0.0305905	0.919398	1
sp|P62889|RL30_MOUSE	P62889	RL30_MOUSE	Rpl30	60S ribosomal protein L30	0.805875	-0.311371	0.91955	1
tr|A2A654|A2A654_MOUSE	A2A654	A2A654_MOUSE	Bptf	Protein Bptf	1.02136	0.0304947	0.919563	1
sp|Q8R5L3|VPS39_MOUSE	Q8R5L3	VPS39_MOUSE	Vps39	Vam6/Vps39-like protein	0.806045	-0.311068	0.92007	1
sp|Q80TL7|MON2_MOUSE	Q80TL7	MON2_MOUSE	Mon2	Protein MON2 homolog	0.806115	-0.310943	0.920285	1
sp|Q9CZ30|OLA1_MOUSE	Q9CZ30	OLA1_MOUSE	Ola1	Obg-like ATPase 1	0.806143	-0.310892	0.920372	1
sp|Q8K1X1|WDR11_MOUSE	Q8K1X1	WDR11_MOUSE	Wdr11	WD repeat-containing protein 11	1.02068	0.0295243	0.921227	1
sp|Q6PE54|DHX40_MOUSE	Q6PE54	DHX40_MOUSE	Dhx40	Probable ATP-dependent RNA helicase DHX40	1.02061	0.0294304	0.921388	1
sp|Q9CXV0|ISL2_MOUSE	Q9CXV0	ISL2_MOUSE	Isl2	Insulin gene enhancer protein ISL-2	1.02058	0.0293871	0.921462	1
sp|Q6PCP5|MFF_MOUSE	Q6PCP5	MFF_MOUSE	Mff	Mitochondrial fission factor	0.806565	-0.310138	0.921663	1
sp|Q9CVB6|ARPC2_MOUSE	Q9CVB6	ARPC2_MOUSE	Arpc2	Actin-related protein 2/3 complex subunit 2	0.806635	-0.310013	0.921878	1
sp|Q99MI1|RB6I2_MOUSE	Q99MI1	RB6I2_MOUSE	Erc1	ELKS/Rab6-interacting/CAST family member 1	1.02039	0.0291257	0.921909	1
sp|Q80Y44|DDX10_MOUSE	Q80Y44	DDX10_MOUSE	Ddx10	Probable ATP-dependent RNA helicase DDX10	1.02014	0.0287695	0.922517	1
sp|Q9WV92|E41L3_MOUSE	Q9WV92	E41L3_MOUSE	Epb41l3	Band 4.1-like protein 3	0.80704	-0.309288	0.923114	1
sp|Q8VDT9|RM50_MOUSE	Q8VDT9	RM50_MOUSE	Mrpl50	39S ribosomal protein L50, mitochondrial	1.01983	0.0283222	0.92328	1
sp|Q80U93|NU214_MOUSE	Q80U93	NU214_MOUSE	Nup214	Nuclear pore complex protein Nup214	0.807136	-0.309116	0.923408	1
sp|Q3U3E2|F117B_MOUSE	Q3U3E2	F117B_MOUSE	Fam117b	Protein FAM117B	1.01969	0.0281357	0.923597	1
sp|Q9DCH4|EIF3F_MOUSE	Q9DCH4	EIF3F_MOUSE	Eif3f	Eukaryotic translation initiation factor 3 subunit F	0.807282	-0.308855	0.923852	1
sp|Q80ZJ1|RAP2A_MOUSE	Q80ZJ1	RAP2A_MOUSE	Rap2a	Ras-related protein Rap-2a	0.807711	-0.308088	0.925154	1
sp|Q8CCN5|BCAS3_MOUSE	Q8CCN5	BCAS3_MOUSE	Bcas3	Breast carcinoma-amplified sequence 3 homolog	1.01892	0.027042	0.925455	1
sp|Q64324|STXB2_MOUSE	Q64324	STXB2_MOUSE	Stxbp2	Syntaxin-binding protein 2	1.0189	0.0270055	0.925516	1
sp|Q08122|TLE3_MOUSE	Q08122	TLE3_MOUSE	Tle3	Transducin-like enhancer protein 3	1.01871	0.0267427	0.925961	1
sp|Q8BHB4|WDR3_MOUSE	Q8BHB4	WDR3_MOUSE	Wdr3	WD repeat-containing protein 3	1.01852	0.0264771	0.926411	1
sp|Q8VD75|HIP1_MOUSE	Q8VD75	HIP1_MOUSE	Hip1	Huntingtin-interacting protein 1	0.808306	-0.307027	0.92695	1
sp|P35700|PRDX1_MOUSE	P35700	PRDX1_MOUSE	Prdx1	Peroxiredoxin-1	1.01785	0.025518	0.928029	1
sp|Q9Z2U0|PSA7_MOUSE	Q9Z2U0	PSA7_MOUSE	Psma7	Proteasome subunit alpha type-7	0.808673	-0.306372	0.928055	1
sp|O88342|WDR1_MOUSE	O88342	WDR1_MOUSE	Wdr1	WD repeat-containing protein 1	0.808806	-0.306134	0.928455	1
sp|Q9QY76|VAPB_MOUSE	Q9QY76	VAPB_MOUSE	Vapb	Vesicle-associated membrane protein-associated protein B	0.808883	-0.305998	0.928683	1
sp|Q9D880|TIM50_MOUSE	Q9D880	TIM50_MOUSE	Timm50	Mitochondrial import inner membrane translocase subunit TIM50	0.808947	-0.305882	0.928878	1
sp|Q8C863|ITCH_MOUSE	Q8C863	ITCH_MOUSE	Itch	E3 ubiquitin-protein ligase Itchy	1.01745	0.024956	0.928974	1
sp|Q80U78|PUM1_MOUSE	Q80U78	PUM1_MOUSE	Pum1	Pumilio homolog 1	1.01721	0.0246161	0.929544	1
sp|Q61166|MARE1_MOUSE	Q61166	MARE1_MOUSE	Mapre1	Microtubule-associated protein RP/EB family member 1	0.809298	-0.305257	0.929927	1
tr|G5E829|G5E829_MOUSE	G5E829	G5E829_MOUSE	Atp2b1	Calcium-transporting ATPase	0.809323	-0.305212	0.930002	1
sp|Q61553|FSCN1_MOUSE	Q61553	FSCN1_MOUSE	Fscn1	Fascin	1.01693	0.0242182	0.930211	1
sp|Q7TNV0|DEK_MOUSE	Q7TNV0	DEK_MOUSE	Dek	Protein DEK	1.01674	0.0239535	0.930654	1
sp|Q3UUG6|TBC24_MOUSE	Q3UUG6	TBC24_MOUSE	Tbc1d24	TBC1 domain family member 24	1.01638	0.0234328	0.931524	1
sp|Q6R0H7|GNAS1_MOUSE	Q6R0H7	GNAS1_MOUSE	Gnas	Guanine nucleotide-binding protein G(s) subunit alpha isoforms XLas	1.01632	0.0233595	0.931646	1
sp|P97452|BOP1_MOUSE	P97452	BOP1_MOUSE	Bop1	Ribosome biogenesis protein BOP1	0.810106	-0.303817	0.932332	1
sp|P62737|ACTA_MOUSE	P62737	ACTA_MOUSE	Acta2	Actin, aortic smooth muscle	0.810109	-0.303812	0.932341	1
sp|Q9CQJ4|RING2_MOUSE	Q9CQJ4	RING2_MOUSE	Rnf2	E3 ubiquitin-protein ligase RING2	1.01571	0.0224954	0.933085	1
sp|P60710|ACTB_MOUSE	P60710	ACTB_MOUSE	Actb	Actin, cytoplasmic 1	0.810472	-0.303166	0.933414	1
sp|Q8BHN3|GANAB_MOUSE	Q8BHN3	GANAB_MOUSE	Ganab	Neutral alpha-glucosidase AB	0.810883	-0.302435	0.934627	1
sp|P09041|PGK2_MOUSE	P09041	PGK2_MOUSE	Pgk2	Phosphoglycerate kinase 2	0.810948	-0.302319	0.934818	1
sp|Q6DFW4|NOP58_MOUSE	Q6DFW4	NOP58_MOUSE	Nop58	Nucleolar protein 58	1.01497	0.0214312	0.93485	1
sp|Q9WTX2|PRKRA_MOUSE	Q9WTX2	PRKRA_MOUSE	Prkra	Interferon-inducible double-stranded RNA-dependent protein kinase activator A	0.811044	-0.302149	0.935101	1
sp|P04370|MBP_MOUSE	P04370	MBP_MOUSE	Mbp	Myelin basic protein	0.811137	-0.301982	0.935375	1
sp|Q9QYJ3|DNJB1_MOUSE	Q9QYJ3	DNJB1_MOUSE	Dnajb1	DnaJ homolog subfamily B member 1	0.811231	-0.301816	0.935651	1
sp|Q9R0A5|NEK3_MOUSE	Q9R0A5	NEK3_MOUSE	Nek3	Serine/threonine-protein kinase Nek3	1.01448	0.0207364	0.935997	1
sp|A2AJK6|CHD7_MOUSE	A2AJK6	CHD7_MOUSE	Chd7	Chromodomain-helicase-DNA-binding protein 7	1.01439	0.0206108	0.936204	1
sp|Q9ERK4|XPO2_MOUSE	Q9ERK4	XPO2_MOUSE	Cse1l	Exportin-2	1.01436	0.0205671	0.936276	1
sp|Q6GYP7|RGPA1_MOUSE	Q6GYP7	RGPA1_MOUSE	Ralgapa1	Ral GTPase-activating protein subunit alpha-1	0.811529	-0.301286	0.936524	1
sp|Q9JJU8|SH3L1_MOUSE	Q9JJU8	SH3L1_MOUSE	Sh3bgrl	SH3 domain-binding glutamic acid-rich-like protein	1.01414	0.0202635	0.936776	1
sp|Q922Y1|UBXN1_MOUSE	Q922Y1	UBXN1_MOUSE	Ubxn1	UBX domain-containing protein 1	1.01387	0.019876	0.937414	1
sp|Q8VEJ9|VPS4A_MOUSE	Q8VEJ9	VPS4A_MOUSE	Vps4a	Vacuolar protein sorting-associated protein 4A	1.01383	0.0198175	0.93751	1
sp|Q00422|GABPA_MOUSE	Q00422	GABPA_MOUSE	Gabpa	GA-binding protein alpha chain	1.01322	0.0189421	0.938945	1
sp|P23198|CBX3_MOUSE	P23198	CBX3_MOUSE	Cbx3	Chromobox protein homolog 3	1.01309	0.0187644	0.939235	1
sp|Q9ERG2|STRN3_MOUSE	Q9ERG2	STRN3_MOUSE	Strn3	Striatin-3	0.812494	-0.299571	0.939337	1
sp|Q99K51|PLST_MOUSE	Q99K51	PLST_MOUSE	Pls3	Plastin-3	0.81252	-0.299525	0.939412	1
sp|O54879|HMGB3_MOUSE	O54879	HMGB3_MOUSE	Hmgb3	High mobility group protein B3	0.81282	-0.298993	0.940281	1
tr|G3X972|G3X972_MOUSE	G3X972	G3X972_MOUSE	Sec24c	Protein Sec24c	0.812939	-0.298782	0.940625	1
sp|P62259|1433E_MOUSE	P62259	1433E_MOUSE	Ywhae	14-3-3 protein epsilon	0.81303	-0.298619	0.94089	1
sp|Q9CR47|NSA2_MOUSE	Q9CR47	NSA2_MOUSE	Nsa2	Ribosome biogenesis protein NSA2 homolog	0.813127	-0.298447	0.94117	1
sp|Q9CXE7|TMED5_MOUSE	Q9CXE7	TMED5_MOUSE	Tmed5	Transmembrane emp24 domain-containing protein 5	1.01205	0.0172875	0.941641	1
sp|Q811D0|DLG1_MOUSE	Q811D0	DLG1_MOUSE	Dlg1	Disks large homolog 1	0.813406	-0.297953	0.941971	1
sp|Q6ZWZ2|UB2R2_MOUSE	Q6ZWZ2	UB2R2_MOUSE	Ube2r2	Ubiquitin-conjugating enzyme E2 R2	0.81366	-0.297502	0.942702	1
sp|P59470|RPC2_MOUSE	P59470	RPC2_MOUSE	Polr3b	DNA-directed RNA polymerase III subunit RPC2	1.01159	0.0166267	0.942713	1
sp|Q3UGR5|HDHD2_MOUSE	Q3UGR5	HDHD2_MOUSE	Hdhd2	Haloacid dehalogenase-like hydrolase domain-containing protein 2	1.01126	0.0161525	0.943479	1
sp|Q80W35|TM202_MOUSE	Q80W35	TM202_MOUSE	Tmem202	Transmembrane protein 202	0.814259	-0.29644	0.944417	1
sp|Q8CI43|MYL6B_MOUSE	Q8CI43	MYL6B_MOUSE	Myl6b	Myosin light chain 6B	0.814362	-0.296258	0.94471	1
sp|Q00558|F8I2_MOUSE	Q00558	F8I2_MOUSE	F8a1	Factor VIII intron 22 protein	0.814373	-0.296238	0.944743	1
sp|Q9QZQ8|H2AY_MOUSE	Q9QZQ8	H2AY_MOUSE	H2afy	Core histone macro-H2A.1	0.814585	-0.295864	0.945344	1
sp|Q9EPE9|AT131_MOUSE	Q9EPE9	AT131_MOUSE	Atp13a1	Manganese-transporting ATPase 13A1	1.01044	0.0149812	0.945366	1
sp|Q99PL5|RRBP1_MOUSE	Q99PL5	RRBP1_MOUSE	Rrbp1	Ribosome-binding protein 1	0.81463	-0.295783	0.945475	1
sp|O08529|CAN2_MOUSE	O08529	CAN2_MOUSE	Capn2	Calpain-2 catalytic subunit	0.814651	-0.295746	0.945533	1
sp|P31230|AIMP1_MOUSE	P31230	AIMP1_MOUSE	Aimp1	Aminoacyl tRNA synthase complex-interacting multifunctional protein 1	0.815138	-0.294883	0.946916	1
sp|O88441|MTX2_MOUSE	O88441	MTX2_MOUSE	Mtx2	Metaxin-2	0.815143	-0.294875	0.946929	1
tr|Q6PHQ9|Q6PHQ9_MOUSE	Q6PHQ9	Q6PHQ9_MOUSE	Pabpc4	MCG5546, isoform CRA_c	0.815328	-0.294547	0.947453	1
sp|Q9WU84|CCS_MOUSE	Q9WU84	CCS_MOUSE	Ccs	Copper chaperone for superoxide dismutase	1.00949	0.0136329	0.947525	1
sp|P18654|KS6A3_MOUSE	P18654	KS6A3_MOUSE	Rps6ka3	Ribosomal protein S6 kinase alpha-3	0.815385	-0.294446	0.947614	1
sp|P48758|CBR1_MOUSE	P48758	CBR1_MOUSE	Cbr1	Carbonyl reductase [NADPH] 1	1.0094	0.0134953	0.947744	1
sp|P97371|PSME1_MOUSE	P97371	PSME1_MOUSE	Psme1	Proteasome activator complex subunit 1	0.815556	-0.294145	0.948094	1
sp|Q8VEG6|CNO6L_MOUSE	Q8VEG6	CNO6L_MOUSE	Cnot6l	CCR4-NOT transcription complex subunit 6-like	1.00917	0.0131764	0.948253	1
sp|Q6PDQ2|CHD4_MOUSE	Q6PDQ2	CHD4_MOUSE	Chd4	Chromodomain-helicase-DNA-binding protein 4	1.00907	0.0130324	0.948482	1
sp|Q9D8V0|HM13_MOUSE	Q9D8V0	HM13_MOUSE	Hm13	Minor histocompatibility antigen H13	0.815827	-0.293665	0.948858	1
sp|Q9D0K0|TBCD7_MOUSE	Q9D0K0	TBCD7_MOUSE	Tbc1d7	TBC1 domain family member 7	0.81588	-0.293571	0.949008	1
sp|Q8K0C4|CP51A_MOUSE	Q8K0C4	CP51A_MOUSE	Cyp51a1	Lanosterol 14-alpha demethylase	0.816118	-0.29315	0.949675	1
sp|E9Q557|DESP_MOUSE	E9Q557	DESP_MOUSE	Dsp	Desmoplakin	0.816142	-0.293108	0.949742	1
sp|Q9QYH6|MAGD1_MOUSE	Q9QYH6	MAGD1_MOUSE	Maged1	Melanoma-associated antigen D1	0.816456	-0.292553	0.950621	1
sp|Q8C3X4|GUF1_MOUSE	Q8C3X4	GUF1_MOUSE	Guf1	Translation factor Guf1, mitochondrial	1.008	0.0114995	0.950912	1
sp|O55242|SGMR1_MOUSE	O55242	SGMR1_MOUSE	Sigmar1	Sigma non-opioid intracellular receptor 1	1.00792	0.0113857	0.951092	1
sp|P18653|KS6A1_MOUSE	P18653	KS6A1_MOUSE	Rps6ka1	Ribosomal protein S6 kinase alpha-1	1.00788	0.011317	0.9512	1
sp|Q8BKX6|SMG1_MOUSE	Q8BKX6	SMG1_MOUSE	Smg1	Serine/threonine-protein kinase SMG1	0.817022	-0.291553	0.952198	1
sp|Q921L5|COG2_MOUSE	Q921L5	COG2_MOUSE	Cog2	Conserved oligomeric Golgi complex subunit 2	0.817195	-0.291247	0.952678	1
sp|P70700|RPA2_MOUSE	P70700	RPA2_MOUSE	Polr1b	DNA-directed RNA polymerase I subunit RPA2	1.00705	0.0101409	0.953051	1
sp|P63028|TCTP_MOUSE	P63028	TCTP_MOUSE	Tpt1	Translationally-controlled tumor protein	0.817345	-0.290983	0.953093	1
sp|P70670|NACAM_MOUSE	P70670	NACAM_MOUSE	Naca	Nascent polypeptide-associated complex subunit alpha, muscle-specific form	0.81742	-0.29085	0.953301	1
sp|P61957|SUMO2_MOUSE	P61957	SUMO2_MOUSE	Sumo2	Small ubiquitin-related modifier 2	1.00677	0.00973607	0.953685	1
sp|Q9JLB0|MPP6_MOUSE	Q9JLB0	MPP6_MOUSE	Mpp6	MAGUK p55 subfamily member 6	1.00668	0.00960656	0.953888	1
sp|Q9CXU9|EIF1B_MOUSE	Q9CXU9	EIF1B_MOUSE	Eif1b	Eukaryotic translation initiation factor 1b	1.00663	0.00953491	0.954	1
sp|Q9JI91|ACTN2_MOUSE	Q9JI91	ACTN2_MOUSE	Actn2	Alpha-actinin-2	0.817891	-0.29002	0.9546	1
sp|Q08943|SSRP1_MOUSE	Q08943	SSRP1_MOUSE	Ssrp1	FACT complex subunit SSRP1	1.00611	0.00878935	0.955164	1
sp|P07356|ANXA2_MOUSE	P07356	ANXA2_MOUSE	Anxa2	Annexin A2	0.818122	-0.289612	0.955236	1
sp|Q05D44|IF2P_MOUSE	Q05D44	IF2P_MOUSE	Eif5b	Eukaryotic translation initiation factor 5B	0.818166	-0.289535	0.955357	1
sp|Q9JHJ0|TMOD3_MOUSE	Q9JHJ0	TMOD3_MOUSE	Tmod3	Tropomodulin-3	1.00579	0.00833506	0.955871	1
sp|Q9QXX4|CMC2_MOUSE	Q9QXX4	CMC2_MOUSE	Slc25a13	Calcium-binding mitochondrial carrier protein Aralar2	1.00576	0.00828498	0.955949	1
sp|Q6ZWY3|RS27L_MOUSE	Q6ZWY3	RS27L_MOUSE	Rps27l	40S ribosomal protein S27-like	0.818471	-0.288997	0.956193	1
sp|Q9CWX9|DDX47_MOUSE	Q9CWX9	DDX47_MOUSE	Ddx47	Probable ATP-dependent RNA helicase DDX47	1.0056	0.00805839	0.956301	1
sp|Q11011|PSA_MOUSE	Q11011	PSA_MOUSE	Npepps	Puromycin-sensitive aminopeptidase	0.818516	-0.288918	0.956316	1
sp|Q8C570|RAE1L_MOUSE	Q8C570	RAE1L_MOUSE	Rae1	mRNA export factor	0.818576	-0.288812	0.956479	1
sp|P49025|CTRO_MOUSE	P49025	CTRO_MOUSE	Cit	Citron Rho-interacting kinase	1.0054	0.00776441	0.956757	1
sp|Q2TPA8|HSDL2_MOUSE	Q2TPA8	HSDL2_MOUSE	Hsdl2	Hydroxysteroid dehydrogenase-like protein 2	0.818967	-0.288123	0.957547	1
sp|P61924|COPZ1_MOUSE	P61924	COPZ1_MOUSE	Copz1	Coatomer subunit zeta-1	1.00474	0.00681822	0.95822	1
sp|Q3UVK0|ERMP1_MOUSE	Q3UVK0	ERMP1_MOUSE	Ermp1	Endoplasmic reticulum metallopeptidase 1	1.00465	0.00669576	0.958409	1
tr|F7BPW6|F7BPW6_MOUSE	F7BPW6	F7BPW6_MOUSE	Sec16a	Protein Sec16a (Fragment)	1.00443	0.00637261	0.958907	1
sp|Q9CYZ2|TPD54_MOUSE	Q9CYZ2	TPD54_MOUSE	Tpd52l2	Tumor protein D54	0.819544	-0.287107	0.959113	1
sp|Q8BTW9|PAK4_MOUSE	Q8BTW9	PAK4_MOUSE	Pak4	Serine/threonine-protein kinase PAK 4	1.00422	0.00606893	0.959374	1
sp|Q3UGC7|EI3JA_MOUSE	Q3UGC7	EI3JA_MOUSE	Eif3j1	Eukaryotic translation initiation factor 3 subunit J-A	0.819722	-0.286793	0.959597	1
sp|Q8C166|CPNE1_MOUSE	Q8C166	CPNE1_MOUSE	Cpne1	Copine-1	1.00408	0.00587888	0.959665	1
sp|P55096|ABCD3_MOUSE	P55096	ABCD3_MOUSE	Abcd3	ATP-binding cassette sub-family D member 3	0.819855	-0.286559	0.959955	1
sp|Q64152-2|BTF3_MOUSE	Q64152-2	BTF3_MOUSE	Btf3	Isoform 2 of Transcription factor BTF3	1.00391	0.00562394	0.960057	1
sp|Q9JI39|ABCBA_MOUSE	Q9JI39	ABCBA_MOUSE	Abcb10	ATP-binding cassette sub-family B member 10, mitochondrial	0.819915	-0.286454	0.960116	1
sp|Q91V41|RAB14_MOUSE	Q91V41	RAB14_MOUSE	Rab14	Ras-related protein Rab-14	0.81998	-0.286339	0.960292	1
sp|Q8BGE6|ATG4B_MOUSE	Q8BGE6	ATG4B_MOUSE	Atg4b	Cysteine protease ATG4B	1.00373	0.0053699	0.960446	1
sp|Q99KQ4|NAMPT_MOUSE	Q99KQ4	NAMPT_MOUSE	Nampt	Nicotinamide phosphoribosyltransferase	0.820194	-0.285962	0.960869	1
sp|Q8BU14|SEC62_MOUSE	Q8BU14	SEC62_MOUSE	Sec62	Translocation protein SEC62	1.00348	0.00500864	0.960998	1
sp|Q91Z67|SRGP2_MOUSE	Q91Z67	SRGP2_MOUSE	Srgap2	SLIT-ROBO Rho GTPase-activating protein 2	0.820364	-0.285664	0.961324	1
sp|Q80U95|UBE3C_MOUSE	Q80U95	UBE3C_MOUSE	Ube3c	Ubiquitin-protein ligase E3C	1.00323	0.00464875	0.961548	1
sp|Q91WT9|CBS_MOUSE	Q91WT9	CBS_MOUSE	Cbs	Cystathionine beta-synthase	0.820564	-0.285312	0.961861	1
tr|E9PZF0|E9PZF0_MOUSE	E9PZF0	E9PZF0_MOUSE	Gm20390	Nucleoside diphosphate kinase	0.820584	-0.285278	0.961914	1
sp|Q99L45|IF2B_MOUSE	Q99L45	IF2B_MOUSE	Eif2s2	Eukaryotic translation initiation factor 2 subunit 2	1.0029	0.00417665	0.962267	1
sp|Q8BYB9|PGLT1_MOUSE	Q8BYB9	PGLT1_MOUSE	Poglut1	Protein O-glucosyltransferase 1	1.00285	0.00410776	0.962372	1
sp|Q8K268|ABCF3_MOUSE	Q8K268	ABCF3_MOUSE	Abcf3	ATP-binding cassette sub-family F member 3	0.820797	-0.284903	0.962484	1
sp|Q9CZX9|EMC4_MOUSE	Q9CZX9	EMC4_MOUSE	Emc4	ER membrane protein complex subunit 4	0.820841	-0.284826	0.962601	1
sp|Q9Z1K5|ARI1_MOUSE	Q9Z1K5	ARI1_MOUSE	Arih1	E3 ubiquitin-protein ligase ARIH1	1.00264	0.00379955	0.96284	1
sp|Q61792|LASP1_MOUSE	Q61792	LASP1_MOUSE	Lasp1	LIM and SH3 domain protein 1	1.00237	0.00340967	0.963431	1
sp|Q6PIC6|AT1A3_MOUSE	Q6PIC6	AT1A3_MOUSE	Atp1a3	Sodium/potassium-transporting ATPase subunit alpha-3	0.821319	-0.283985	0.963876	1
sp|P28352|APEX1_MOUSE	P28352	APEX1_MOUSE	Apex1	DNA-(apurinic or apyrimidinic site) lyase	0.821384	-0.283872	0.964047	1
sp|Q9CQF8|RT63_MOUSE	Q9CQF8	RT63_MOUSE	Mrpl57	Ribosomal protein 63, mitochondrial	1.00198	0.0028541	0.964272	1
sp|O55029|COPB2_MOUSE	O55029	COPB2_MOUSE	Copb2	Coatomer subunit beta'	0.821469	-0.283722	0.964273	1
sp|Q6NVE8|WDR44_MOUSE	Q6NVE8	WDR44_MOUSE	Wdr44	WD repeat-containing protein 44	0.821479	-0.283705	0.9643	1
sp|Q9EPL8|IPO7_MOUSE	Q9EPL8	IPO7_MOUSE	Ipo7	Importin-7	1.00192	0.00276477	0.964407	1
sp|P39054|DYN2_MOUSE	P39054	DYN2_MOUSE	Dnm2	Dynamin-2	0.821581	-0.283524	0.964571	1
sp|Q8CII2|CD123_MOUSE	Q8CII2	CD123_MOUSE	Cdc123	Cell division cycle protein 123 homolog	0.821588	-0.283514	0.964588	1
sp|Q99KK7|DPP3_MOUSE	Q99KK7	DPP3_MOUSE	Dpp3	Dipeptidyl peptidase 3	1.00183	0.00264269	0.964591	1
sp|P52332|JAK1_MOUSE	P52332	JAK1_MOUSE	Jak1	Tyrosine-protein kinase JAK1	0.82164	-0.283422	0.964726	1
sp|P14115|RL27A_MOUSE	P14115	RL27A_MOUSE	Rpl27a	60S ribosomal protein L27a	0.821658	-0.283391	0.964773	1
sp|B2RRE7|OTUD4_MOUSE	B2RRE7	OTUD4_MOUSE	Otud4	OTU domain-containing protein 4	1.00148	0.00213133	0.965361	1
sp|P58252|EF2_MOUSE	P58252	EF2_MOUSE	Eef2	Elongation factor 2	0.8219	-0.282965	0.965415	1
sp|Q8JZQ9|EIF3B_MOUSE	Q8JZQ9	EIF3B_MOUSE	Eif3b	Eukaryotic translation initiation factor 3 subunit B	1.00131	0.00188308	0.965735	1
sp|Q9EP71|RAI14_MOUSE	Q9EP71	RAI14_MOUSE	Rai14	Ankycorbin	0.822106	-0.282604	0.965957	1
sp|Q8R5C5|ACTY_MOUSE	Q8R5C5	ACTY_MOUSE	Actr1b	Beta-centractin	0.822114	-0.28259	0.965977	1
sp|Q61739|ITA6_MOUSE	Q61739	ITA6_MOUSE	Itga6	Integrin alpha-6	1.00117	0.0016928	0.96602	1
sp|Q61595|KTN1_MOUSE	Q61595	KTN1_MOUSE	Ktn1	Kinectin	1.00105	0.00151177	0.966292	1
sp|P31750|AKT1_MOUSE	P31750	AKT1_MOUSE	Akt1	RAC-alpha serine/threonine-protein kinase	0.822251	-0.282349	0.96634	1
sp|P49813|TMOD1_MOUSE	P49813	TMOD1_MOUSE	Tmod1	Tropomodulin-1	0.822349	-0.282177	0.966597	1
sp|Q8BWW4|LARP4_MOUSE	Q8BWW4	LARP4_MOUSE	Larp4	La-related protein 4	0.82245	-0.282	0.966862	1
sp|Q9JKC8|AP3M1_MOUSE	Q9JKC8	AP3M1_MOUSE	Ap3m1	AP-3 complex subunit mu-1	0.82248	-0.281947	0.966941	1
sp|Q5SNZ0|GRDN_MOUSE	Q5SNZ0	GRDN_MOUSE	Ccdc88a	Girdin	0.822551	-0.281823	0.967127	1
sp|Q9WVS8|MK07_MOUSE	Q9WVS8	MK07_MOUSE	Mapk7	Mitogen-activated protein kinase 7	0.822558	-0.28181	0.967146	1
sp|O35963|RB33B_MOUSE	O35963	RB33B_MOUSE	Rab33b	Ras-related protein Rab-33B	0.822622	-0.281698	0.967314	1
sp|P62849|RS24_MOUSE	P62849	RS24_MOUSE	Rps24	40S ribosomal protein S24	0.822772	-0.281435	0.967707	1
sp|P61458|PHS_MOUSE	P61458	PHS_MOUSE	Pcbd1	Pterin-4-alpha-carbinolamine dehydratase	1.00028	0.000402909	0.96795	1
sp|Q8BMZ5|SEN34_MOUSE	Q8BMZ5	SEN34_MOUSE	Tsen34	tRNA-splicing endonuclease subunit Sen34	1.00019	0.000278112	0.968135	1
sp|P47941|CRKL_MOUSE	P47941	CRKL_MOUSE	Crkl	Crk-like protein	1.00006	8.58494e-05	0.968422	1
sp|P67984|RL22_MOUSE	P67984	RL22_MOUSE	Rpl22	60S ribosomal protein L22	0.823095	-0.280869	0.96855	1
sp|P21107-2|TPM3_MOUSE	P21107-2	TPM3_MOUSE	Tpm3	Isoform 2 of Tropomyosin alpha-3 chain	0.823144	-0.280784	0.968676	1
sp|Q61316|HSP74_MOUSE	Q61316	HSP74_MOUSE	Hspa4	Heat shock 70 kDa protein 4	0.999883	-0.00016916	0.968801	1
sp|Q8R1U1|COG4_MOUSE	Q8R1U1	COG4_MOUSE	Cog4	Conserved oligomeric Golgi complex subunit 4	0.823246	-0.280605	0.968941	1
sp|Q8VE80|THOC3_MOUSE	Q8VE80	THOC3_MOUSE	Thoc3	THO complex subunit 3	0.999774	-0.000325724	0.969033	1
tr|B9EJR8|B9EJR8_MOUSE	B9EJR8	B9EJR8_MOUSE	Heatr2	HEAT repeat containing 2	0.999669	-0.000477628	0.969259	1
tr|Q3TA68|Q3TA68_MOUSE	Q3TA68	Q3TA68_MOUSE	Wdr36	Protein Wdr36	0.823419	-0.280301	0.969393	1
sp|Q9D8Y0|EFHD2_MOUSE	Q9D8Y0	EFHD2_MOUSE	Efhd2	EF-hand domain-containing protein D2	0.823437	-0.280269	0.96944	1
sp|Q9D7G0|PRPS1_MOUSE	Q9D7G0	PRPS1_MOUSE	Prps1	Ribose-phosphate pyrophosphokinase 1	0.823443	-0.280259	0.969455	1
sp|Q02819|NUCB1_MOUSE	Q02819	NUCB1_MOUSE	Nucb1	Nucleobindin-1	0.823485	-0.280186	0.969563	1
sp|Q8C4Y3|NELFB_MOUSE	Q8C4Y3	NELFB_MOUSE	Nelfb	Negative elongation factor B	0.999492	-0.000733453	0.969638	1
sp|Q8R332|NUPL1_MOUSE	Q8R332	NUPL1_MOUSE	Nupl1	Nucleoporin p58/p45	0.82363	-0.279931	0.96994	1
sp|Q8CGC6|RBM28_MOUSE	Q8CGC6	RBM28_MOUSE	Rbm28	RNA-binding protein 28	0.999327	-0.000971327	0.96999	1
sp|Q5H8C4|VP13A_MOUSE	Q5H8C4	VP13A_MOUSE	Vps13a	Vacuolar protein sorting-associated protein 13A	0.999153	-0.00122207	0.97036	1
sp|Q9Z0N1|IF2G_MOUSE	Q9Z0N1	IF2G_MOUSE	Eif2s3x	Eukaryotic translation initiation factor 2 subunit 3, X-linked	0.99905	-0.00137141	0.970581	1
sp|Q05512|MARK2_MOUSE	Q05512	MARK2_MOUSE	Mark2	Serine/threonine-protein kinase MARK2	0.998949	-0.00151651	0.970795	1
sp|Q99JT2|MST4_MOUSE	Q99JT2	MST4_MOUSE	Mst4	Serine/threonine-protein kinase MST4	0.824181	-0.278966	0.971364	1
sp|P45878|FKBP2_MOUSE	P45878	FKBP2_MOUSE	Fkbp2	Peptidyl-prolyl cis-trans isomerase FKBP2	0.824191	-0.278949	0.971389	1
sp|Q3V1L4|5NTC_MOUSE	Q3V1L4	5NTC_MOUSE	Nt5c2	Cytosolic purine 5'-nucleotidase	0.998561	-0.00207803	0.971621	1
sp|O70493|SNX12_MOUSE	O70493	SNX12_MOUSE	Snx12	Sorting nexin-12	0.998355	-0.00237492	0.972057	1
sp|Q8BGF3|WDR92_MOUSE	Q8BGF3	WDR92_MOUSE	Wdr92	WD repeat-containing protein 92	0.824611	-0.278215	0.972466	1
sp|Q8BHS6|ARMX3_MOUSE	Q8BHS6	ARMX3_MOUSE	Armcx3	Armadillo repeat-containing X-linked protein 3	0.824736	-0.277995	0.972788	1
sp|Q9WV85|NDK3_MOUSE	Q9WV85	NDK3_MOUSE	Nme3	Nucleoside diphosphate kinase 3	0.997971	-0.00293044	0.972871	1
sp|Q9Z1T1|AP3B1_MOUSE	Q9Z1T1	AP3B1_MOUSE	Ap3b1	AP-3 complex subunit beta-1	0.825132	-0.277303	0.973798	1
sp|P35293|RAB18_MOUSE	P35293	RAB18_MOUSE	Rab18	Ras-related protein Rab-18	0.997459	-0.0036711	0.973952	1
sp|Q8R3Q6|CCD58_MOUSE	Q8R3Q6	CCD58_MOUSE	Ccdc58	Coiled-coil domain-containing protein 58	0.82523	-0.277132	0.974048	1
sp|P42230|STA5A_MOUSE	P42230	STA5A_MOUSE	Stat5a	Signal transducer and activator of transcription 5A	0.825311	-0.276991	0.974253	1
sp|P51863|VA0D1_MOUSE	P51863	VA0D1_MOUSE	Atp6v0d1	V-type proton ATPase subunit d 1	0.997222	-0.00401336	0.97445	1
sp|O35435|PYRD_MOUSE	O35435	PYRD_MOUSE	Dhodh	Dihydroorotate dehydrogenase (quinone), mitochondrial	0.997169	-0.00408943	0.97456	1
sp|O09110|MP2K3_MOUSE	O09110	MP2K3_MOUSE	Map2k3	Dual specificity mitogen-activated protein kinase kinase 3	0.825504	-0.276652	0.974745	1
sp|Q08288|LYAR_MOUSE	Q08288	LYAR_MOUSE	Lyar	Cell growth-regulating nucleolar protein	0.825614	-0.27646	0.975023	1
sp|Q9QUJ7|ACSL4_MOUSE	Q9QUJ7	ACSL4_MOUSE	Acsl4	Long-chain-fatty-acid--CoA ligase 4	0.825694	-0.27632	0.975227	1
[truncated: 878 more rows]
