# Supplementary material for: iDRiP for the systematic discovery of proteins bound directly to noncoding RNA
Source: Springer Nature journal article supplement (doi:10.1038/s41596-021-00555-9), 2021-06-09
Supplement: MOESM8 [file 41596_2021_555_MOESM8_ESM21.xlsx]

## Sheet: U1-iDRiP by RankPrdo
gene	log2Ratio	pvalue	pfp	FDR
Snrpb2	5.74484	1.92128e-06	0.00228441	0.00196658
Snrnp70	5.35173	2.48096e-06	0.00196658	0.00196658
Snrpe	5.28733	1.92128e-06	0.00456881	0.00196658
Snrpg	5.02527	1.55662e-05	0.00925413	0.00925413
Sf3a1	4.82221	5.15259e-05	0.0204214	0.0204214
Snrpd3	4.75811	6.57016e-05	0.0223198	0.0223198
Snrpc	4.48806	3.69593e-05	0.0175778	0.0175778
Snrpa	4.25855	0.000592147	0.156458	0.156458
Snrpb	4.08102	0.000216439	0.0643366	0.0643366
Snrpd1	3.49599	0.000675828	0.160712	0.160712
Fus	2.9756	0.00115958	0.196962	0.186156
Myh7	2.90358	0.0111124	0.695401	0.682401
Gemin5	2.8046	0.000752291	0.162632	0.162632
Prpf40b	2.72884	0.0057999	0.459739	0.459739
Prpf40a	2.71781	0.00140542	0.196593	0.196593
Sugp1	2.60406	0.00117424	0.186156	0.186156
Enox1	2.60031	0.000980873	0.194376	0.186156
Coil	2.58504	0.001072	0.196094	0.186156
Myl10	2.53079	0.00566806	0.481381	0.459739
Prpf38b	2.50098	0.00129521	0.192501	0.192501
Ppp1r10	2.46511	0.00167869	0.221774	0.221774
Luc7l3	2.44791	0.00382467	0.395437	0.395437
Myh8	2.42365	0.0211284	0.851581	0.833695
Khsrp	2.39786	0.00544557	0.479614	0.459739
Snrpf	2.34431	0.0187641	0.81129	0.805162
Rbm25	2.23287	0.00840468	0.605646	0.572835
Toe1	2.23189	0.00322021	0.403035	0.395437
Smc6	2.21262	0.00369255	0.399131	0.395437
Gemin4	2.19963	0.00356113	0.403255	0.395437
Zfc3h1	2.14237	0.00355564	0.422765	0.395437
Gpatch8	2.13086	0.00872889	0.593065	0.572835
Rbm10	2.11872	0.00573596	0.470349	0.459739
Rbmx2	2.11767	0.0041958	0.399104	0.399104
Myh3	2.07813	0.0214578	0.850444	0.833695
Sltm	2.05075	0.00415555	0.411745	0.399104
Cherp	2.0369	0.00891291	0.572835	0.572835
Myh4	1.99287	0.0236605	0.852494	0.833695
Tardbp	1.97249	0.00458739	0.41957	0.41957
Ddx20	1.97211	0.0136953	0.740169	0.707302
Smn1	1.97128	0.0137727	0.727813	0.707302
Fubp1	1.96498	0.0136588	0.755362	0.707302
Fubp3	1.95509	0.00806506	0.599334	0.572835
Srsf5	1.94915	0.0127956	0.742145	0.707302
Tnnt3	1.92548	0.0271989	0.862386	0.858196
Nudt21	1.89196	0.0111916	0.682401	0.682401
Rrp1b	1.88703	0.00722211	0.554006	0.554006
Safb2	1.87002	0.0154667	0.707302	0.707302
Zc3h4	1.86333	0.0154244	0.733587	0.707302
Luc7l	1.85382	0.0240756	0.854505	0.833695
Rbbp6	1.82356	0.00857784	0.599944	0.572835
Setd2	1.81768	0.0152988	0.757926	0.707302
Znf638	1.81061	0.00885442	0.584884	0.572835
Znf106	1.7758	0.0154396	0.719909	0.707302
Srsf7	1.76518	0.0173977	0.766142	0.766142
Ssb	1.76307	0.0133681	0.75689	0.707302
Srsf1	1.75545	0.0235689	0.862259	0.833695
Dhx8	1.75135	0.014733	0.76163	0.707302
Akap8	1.74988	0.0122185	0.726387	0.707302
Tial1	1.74186	0.0232098	0.862391	0.833695
Rprd2	1.73242	0.014853	0.751498	0.707302
Ewsr1	1.7184	0.0243825	0.852672	0.833695
Mphosph8	1.7124	0.0204531	0.838577	0.833695
Dido1	1.70207	0.015418	0.748243	0.707302
Ddx17	1.67507	0.0217619	0.848358	0.833695
Pcnp	1.67218	0.0198177	0.826779	0.826779
Rbm6	1.65812	0.022447	0.847286	0.833695
Safb	1.65117	0.0248523	0.844267	0.833695
Sfswap	1.63898	0.0274276	0.858196	0.858196
Phf3	1.62835	0.0159145	0.714051	0.714051
Son	1.62641	0.0288194	0.890034	0.878497
Rpl14	1.62215	0.0263555	0.85854	0.857489
Atg5	1.61971	0.0189609	0.805162	0.805162
Sfpq	1.60976	0.0317397	0.931814	0.878497
Myl1	1.6042	0.0307819	0.926574	0.878497
Rbm17	1.60141	0.029827	0.90934	0.878497
N4bp2l2	1.56652	0.0332596	0.930485	0.878497
Srrm2	1.55709	0.0353738	0.955897	0.878497
Gar1	1.54985	0.0366733	0.958341	0.878497
Thrap3	1.5378	0.0380562	0.952607	0.878497
Dazap1	1.51205	0.0366986	0.948578	0.878497
Srsf10	1.50568	0.0387232	0.959205	0.878497
Zfp207	1.50515	0.0261306	0.863036	0.857489
Znf326	1.50485	0.0372065	0.951365	0.878497
Scaf11	1.50013	0.0389701	0.945622	0.878497
U2surp	1.4888	0.0394274	0.937584	0.878497
Scml2	1.47399	0.0248917	0.833695	0.833695
Thoc2	1.45825	0.0365359	0.965359	0.878497
Rbm15	1.45577	0.0322803	0.924851	0.878497
Celf1	1.43814	0.0319581	0.926783	0.878497
U2af2	1.43803	0.0420579	0.952511	0.878497
Raly	1.43611	0.0453161	0.970825	0.878497
Hnrnpl	1.43146	0.0327782	0.927935	0.878497
Wdr33	1.42654	0.0444956	0.961914	0.878497
Nono	1.42633	0.0380051	0.961449	0.878497
Nxf1	1.42311	0.0333187	0.921301	0.878497
Fam208a	1.4205	0.0336997	0.921126	0.878497
Cdkn2aip	1.41669	0.0389523	0.954934	0.878497
Khdrbs1	1.40316	0.0467203	0.966094	0.878497
Myef2	1.4021	0.0389808	0.936327	0.878497
Ythdc1	1.39384	0.0438231	0.964919	0.878497
Chd2	1.39338	0.0417584	0.973545	0.878497
Clk1	1.39168	0.0500716	0.975986	0.878497
Ccar1	1.38982	0.0443851	0.968329	0.878497
Casq2	1.37854	0.0362099	0.967496	0.878497
Kat8	1.35569	0.0536073	0.988202	0.878497
Hnrnpf	1.35216	0.0422432	0.947683	0.878497
Ptbp1	1.34934	0.0456825	0.969937	0.878497
Hnrnpm	1.34248	0.0462679	0.965132	0.878497
Cdk12	1.33974	0.0501437	0.969444	0.878497
Fubp3	1.31782	0.059103	1.04109	0.878497
Rbmxl1	1.31679	0.0574764	1.02766	0.878497
Pnisr	1.3112	0.0498067	0.978846	0.878497
Knop1	1.30932	0.0530038	0.984712	0.878497
Wdr46	1.30627	0.0482333	0.963856	0.878497
Urb1	1.2931	0.0496691	0.984276	0.878497
Mki67	1.2892	0.0501721	0.962172	0.878497
Tatdn2	1.26	0.0651556	1.0835	0.878497
Chd1	1.25819	0.0629382	1.07674	0.878497
Rsl1d1	1.25136	0.0522992	0.979272	0.878497
Tra2a	1.24964	0.0678094	1.09694	0.878497
Dhx15	1.23711	0.0674715	1.09895	0.878497
Cdc5l	1.23354	0.0691253	1.10322	0.878497
Luc7l2	1.22546	0.0697753	1.10617	0.878497
Champ1	1.22153	0.0649079	1.08698	0.878497
Cpsf6	1.2124	0.0716869	1.11419	0.878497
Supt5h	1.2082	0.0606554	1.05284	0.878497
Srsf4	1.20757	0.0722081	1.11501	0.878497
Elavl1	1.20563	0.0724584	1.09054	0.878497
Srsf9	1.20356	0.0612347	1.05519	0.878497
Zscan10	1.19409	0.0723978	1.1036	0.878497
Cnot2	1.19265	0.0420421	0.970643	0.878497
Dus3l	1.18254	0.0785571	1.12535	0.878497
Ints12	1.18071	0.0746559	1.09588	0.878497
Ppan	1.1803	0.07731	1.12787	0.878497
Foxk2	1.17293	0.0471341	0.957991	0.878497
Hnrnpc	1.16462	0.0715622	1.11957	0.878497
Gm4245	1.16275	0.0814826	1.15337	0.878497
Lyar	1.16069	0.0790853	1.12614	0.878497
Clk3	1.15916	0.0853265	1.18659	0.878497
Fip1l1	1.15911	0.0820622	1.1547	0.878497
Ect2	1.15607	0.0745304	1.10083	0.878497
Mov10	1.15293	0.0641622	1.08211	0.878497
Mtf2	1.15162	0.073285	1.09605	0.878497
Nol8	1.14364	0.0892189	1.19193	0.878497
Brpf1	1.14317	0.0887611	1.19251	0.878497
Ddx18	1.14226	0.0862259	1.17169	0.878497
Hist1h1e	1.13286	0.0420465	0.96141	0.878497
Utp14a	1.13267	0.0782814	1.1282	0.878497
Zfp462	1.13083	0.0855099	1.17539	0.878497
Tet1	1.12613	0.0906826	1.18485	0.878497
Hist1h1c	1.11386	0.0474724	0.956689	0.878497
Prc1	1.10646	0.0980109	1.16535	0.878497
Surf6	1.10576	0.0896028	1.19037	0.878497
Ezh2	1.10461	0.0967984	1.17442	0.878497
Rbm45	1.09756	0.0876963	1.1849	0.878497
Ddx42	1.09747	0.0955071	1.1707	0.878497
Drosha	1.09345	0.100228	1.17991	0.878497
Hnrnpd	1.093	0.0902277	1.19201	0.878497
Ehmt1	1.09146	0.102201	1.19134	0.878497
Dnttip2	1.08701	0.0938667	1.16258	0.878497
Ddx23	1.0861	0.0938183	1.17421	0.878497
Rbm26	1.08355	0.0925908	1.17744	0.878497
Tpm1	1.0825	0.0433617	0.963683	0.878497
Aqr	1.08237	0.103712	1.19722	0.878497
Nup153	1.08032	0.0711121	1.1199	0.878497
Nup50	1.07343	0.110007	1.18907	0.878497
Gtpbp4	1.06704	0.0952251	1.17329	0.878497
Prdm2	1.06443	0.110381	1.18237	0.878497
Elavl2	1.06424	0.0961489	1.17252	0.878497
Dcaf13	1.05703	0.109352	1.19834	0.878497
Tpx2	1.05575	0.11287	1.17721	0.878497
Snrnp200	1.05483	0.106184	1.20817	0.878497
Pwp2	1.05449	0.113883	1.1826	0.878497
Rbm28	1.05129	0.116212	1.18099	0.878497
Rbm27	1.04474	0.107319	1.19814	0.878497
Cpsf1	1.04439	0.119351	1.17767	0.878497
Snw1	1.04124	0.0920832	1.17728	0.878497
Znf280c	1.03853	0.120888	1.1879	0.878497
Ncoa5	1.03201	0.124058	1.18956	0.878497
Utp15	1.03199	0.107824	1.19258	0.878497
Bop1	1.02595	0.106748	1.19738	0.878497
Kif20b	1.02206	0.116605	1.17495	0.878497
Akap8l	1.01519	0.10961	1.1902	0.878497
Ppig	1.01463	0.0999682	1.18271	0.878497
Zcchc9	1.00567	0.132722	1.2233	0.878497
Pdcd11	1.00111	0.126827	1.18738	0.878497
Nkrf	0.980605	0.142184	1.26162	0.878497
Rest	0.979393	0.138832	1.26009	0.878497
Nsd1	0.978791	0.121962	1.19353	0.878497
Tcerg1	0.974412	0.146503	1.26685	0.878497
Hnrnpk	0.974267	0.109556	1.19507	0.878497
Fbl	0.971914	0.145624	1.26847	0.878497
Utp11l	0.967723	0.111082	1.17925	0.878497
Zmym4	0.967104	0.0657884	1.07893	0.878497
Morc3	0.964668	0.140736	1.25816	0.878497
Nup88	0.962304	0.0515689	0.981046	0.878497
Noc3l	0.961359	0.129616	1.20873	0.878497
Casc5	0.961148	0.0938323	1.16824	0.878497
Ranbp2	0.960573	0.0969553	1.17035	0.878497
Rpl7	0.953914	0.106383	1.19895	0.878497
Diexf	0.95275	0.0978946	1.16982	0.878497
Scaf4	0.949405	0.118613	1.18017	0.878497
Smarcc1	0.946121	0.0569221	1.02546	0.878497
Phrf1	0.944254	0.12567	1.19537	0.878497
Srbd1	0.941878	0.149116	1.27553	0.878497
Chd8	0.94128	0.15106	1.27836	0.878497
Rbpj	0.938141	0.153481	1.28968	0.878497
Wdr36	0.936631	0.158168	1.27934	0.878497
Papd5	0.934081	0.166982	1.25263	0.878497
Ankrd11	0.934079	0.123178	1.19558	0.878497
Lemd2	0.931754	0.122821	1.197	0.878497
Top2a	0.931353	0.141834	1.26322	0.878497
Jmjd1c	0.929034	0.163613	1.26322	0.878497
Esrrb	0.925002	0.0723462	1.10993	0.878497
Brix1	0.918331	0.115795	1.1869	0.878497
Dimt1	0.916089	0.160647	1.2906	0.878497
Pspc1	0.912572	0.11084	1.18196	0.878497
Nmt1	0.911753	0.16457	1.25835	0.878497
Hira	0.908918	0.145853	1.26583	0.878497
Rpl18	0.908754	0.15483	1.274	0.878497
Rbm14	0.90789	0.164902	1.25685	0.878497
Ylpm1	0.906949	0.161686	1.27314	0.878497
Rbm7	0.906784	0.153563	1.28582	0.878497
Wdr82	0.905998	0.0635211	1.07895	0.878497
Acin1	0.905506	0.112596	1.17953	0.878497
Hist1h1a	0.903409	0.0828374	1.15875	0.878497
Khdrbs3	0.900001	0.132216	1.22338	0.878497
Sart1	0.896867	0.11456	1.18445	0.878497
Hnrnpa3	0.895101	0.13022	1.20962	0.878497
Nipbl	0.894099	0.151721	1.27941	0.878497
Hnrnpul2	0.891397	0.174462	1.24961	0.878497
Dhx36	0.891211	0.167004	1.24886	0.878497
Cstf2	0.890413	0.154217	1.28226	0.878497
Dhx37	0.88879	0.165195	1.25506	0.878497
Nup210	0.88789	0.173882	1.24922	0.878497
Rif1	0.883286	0.175217	1.25125	0.878497
Nvl	0.880098	0.166594	1.25367	0.878497
Rpl6	0.879457	0.190259	1.26732	0.878497
2310022A10Rik	0.87895	0.170088	1.24452	0.878497
Baz2a	0.878574	0.0775495	1.12447	0.878497
Cebpz	0.87709	0.191606	1.25867	0.878497
Cdca2	0.8724	0.168467	1.24802	0.878497
Zc3h14	0.870601	0.160856	1.28361	0.878497
Phip	0.869214	0.171103	1.2481	0.878497
Lin28a	0.868894	0.140571	1.2662	0.878497
Nop56	0.867767	0.199828	1.26718	0.878497
Gm13247	0.864835	0.191516	1.26507	0.878497
Esco2	0.856268	0.0853583	1.18013	0.878497
Wdr75	0.856199	0.178587	1.26393	0.878497
Rbpms	0.854939	0.147243	1.26864	0.878497
Ddx21	0.854179	0.0740622	1.10075	0.878497
Parp2	0.853799	0.202472	1.26041	0.878497
Pom121	0.851385	0.162505	1.26701	0.878497
Nop2	0.850956	0.208153	1.26596	0.878497
Nol11	0.849429	0.162248	1.27335	0.878497
Tead1	0.847859	0.208274	1.26346	0.878497
Cwc22	0.844072	0.191362	1.26758	0.878497
Ddx54	0.841738	0.173102	1.24739	0.878497
Orc1	0.83901	0.207187	1.26656	0.878497
Pou5f1	0.838619	0.0266838	0.857489	0.857489
Srrt	0.834158	0.118756	1.17667	0.878497
Cirh1a	0.831198	0.216757	1.26335	0.878497
Hnrnph2	0.829056	0.211074	1.26114	0.878497
Atad5	0.827996	0.219873	1.25687	0.878497
Bms1	0.82798	0.21843	1.26381	0.878497
Preb	0.82535	0.217134	1.25938	0.878497
Zc3h11a	0.817281	0.215962	1.26181	0.878497
Smc5	0.810531	0.228237	1.26515	0.878497
Cbx1	0.809596	0.180409	1.26553	0.878497
Mta1	0.809487	0.187314	1.27266	0.878497
Rpp38	0.809445	0.201806	1.26288	0.878497
Suds3	0.807861	0.213348	1.25891	0.878497
Mina	0.805631	0.111295	1.17626	0.878497
Dazl	0.805053	0.199086	1.26584	0.878497
Thoc5	0.80317	0.199974	1.26473	0.878497
Cpsf4	0.800914	0.192798	1.26302	0.878497
Cpsf2	0.799959	0.211743	1.25881	0.878497
Pak1ip1	0.799526	0.232642	1.26019	0.878497
Sf3b3	0.798052	0.23202	1.26547	0.878497
Isg20l2	0.790592	0.238847	1.25105	0.878497
Nip7	0.781723	0.201032	1.26469	0.878497
Dhx9	0.780436	0.218769	1.2627	0.878497
Ddx41	0.780151	0.244646	1.23518	0.878497
Nsa2	0.77857	0.190116	1.26993	0.878497
Kiaa0020	0.778275	0.232417	1.26184	0.878497
H1f0	0.777687	0.046998	0.963459	0.878497
Scaf8	0.776963	0.105281	1.20364	0.878497
Ctr9	0.774888	0.234772	1.2574	0.878497
Col6a3	0.774869	0.223176	1.26662	0.878497
Exosc10	0.774254	0.241576	1.24884	0.878497
Rrp8	0.7741	0.234432	1.25842	0.878497
Snrpd2	0.773689	0.0724129	1.0968	0.878497
Anln	0.772602	0.169737	1.24965	0.878497
Ahctf1	0.769703	0.237154	1.25045	0.878497
Nabp2	0.760458	0.19363	1.26498	0.878497
Usp39	0.758704	0.229137	1.26424	0.878497
Mga	0.758092	0.243613	1.23258	0.878497
Cdca8	0.75805	0.25147	1.23298	0.878497
Ctc1	0.755775	0.228964	1.26622	0.878497
Rfwd2	0.755449	0.254225	1.22131	0.878497
Cdc73	0.754518	0.256884	1.22419	0.878497
Rrs1	0.752406	0.212155	1.25812	0.878497
Orc5	0.751475	0.224272	1.2608	0.878497
Cmas	0.743647	0.22629	1.26319	0.878497
Ddx5	0.743025	0.16753	1.24496	0.878497
Actr8	0.741609	0.262757	1.22517	0.878497
LRWD1	0.735308	0.238084	1.25257	0.878497
Kif23	0.734825	0.0856406	1.17042	0.878497
Sf1	0.733298	0.168626	1.24532	0.878497
Fcf1	0.732607	0.267554	1.2212	0.878497
Nol9	0.726381	0.195536	1.27045	0.878497
Skiv2l2	0.72344	0.266458	1.21853	0.878497
Nup160	0.720509	0.207429	1.26478	0.878497
Nop58	0.720473	0.249569	1.23384	0.878497
Pole	0.720461	0.263724	1.22249	0.878497
Plk1	0.719118	0.147311	1.26464	0.878497
Ddx10	0.718649	0.264431	1.221	0.878497
Hist1h3a	0.714404	0.271832	1.2266	0.878497
Utp6	0.710709	0.281684	1.2179	0.878497
Puf60	0.709453	0.219315	1.26279	0.878497
Kmt2b	0.709097	0.226798	1.26306	0.878497
Fanca	0.707888	0.0977008	1.1734	0.878497
Sympk	0.706294	0.276978	1.21973	0.878497
Smarca5	0.705835	0.2719	1.22458	0.878497
Rrp12	0.705636	0.28169	1.21572	0.878497
Rbm19	0.704167	0.283417	1.21655	0.878497
Anp32b	0.703819	0.0522512	0.986137	0.878497
Eme1	0.702816	0.280657	1.21567	0.878497
Ehmt2	0.702773	0.262796	1.22295	0.878497
Urb2	0.702537	0.260363	1.22846	0.878497
Csnk1d	0.701352	0.247851	1.23303	0.878497
Dkc1	0.699994	0.278861	1.21899	0.878497
Ddx52	0.698372	0.279997	1.21724	0.878497
Rps4l	0.697313	0.172709	1.24833	0.878497
Emg1	0.696788	0.250979	1.23567	0.878497
Srcap	0.696531	0.092062	1.18337	0.878497
Rpl7l1	0.696421	0.287721	1.19615	0.878497
Pmm1	0.696216	0.124131	1.18548	0.878497
Noc2l	0.694924	0.287184	1.19811	0.878497
Elmsan1	0.693528	0.279328	1.21879	0.878497
Hnrnpu	0.692538	0.205563	1.25987	0.878497
Dnmt3a	0.688766	0.289469	1.19507	0.878497
Ptbp2	0.685358	0.274523	1.2271	0.878497
Nup214	0.685317	0.143935	1.2724	0.878497
Rbm34	0.685051	0.285179	1.20027	0.878497
Nup188	0.684885	0.241323	1.25298	0.878497
Smarcal1	0.684132	0.171946	1.24661	0.878497
Papd4	0.683615	0.265339	1.22045	0.878497
G2e3	0.683263	0.234239	1.26023	0.878497
Kdm4c	0.683218	0.0403789	0.950703	0.878497
Ddx27	0.682915	0.281948	1.21462	0.878497
Pop4	0.682616	0.283006	1.21698	0.878497
Rcc2	0.682319	0.167482	1.2485	0.878497
Hnrnpr	0.681306	0.163435	1.26596	0.878497
Tex10	0.681208	0.248931	1.23582	0.878497
Znf800	0.67865	0.292293	1.18816	0.878497
Paxip1	0.67823	0.161429	1.27959	0.878497
Golga2	0.677573	0.285517	1.19957	0.878497
Nbn	0.676805	0.235575	1.25324	0.878497
Atp5f1	0.67218	0.286548	1.19756	0.878497
Ctcf	0.670443	0.0602504	1.0535	0.878497
Trip12	0.668721	0.163966	1.26185	0.878497
Dbr1	0.665409	0.259712	1.22782	0.878497
Sacm1l	0.664378	0.181463	1.26175	0.878497
Wdr3	0.663983	0.289609	1.19357	0.878497
Chd7	0.663131	0.29883	1.19432	0.878497
Rcc1	0.660934	0.28368	1.21548	0.878497
Nup205	0.660307	0.239029	1.24926	0.878497
Utp18	0.657986	0.307557	1.20094	0.878497
Smchd1	0.657832	0.196688	1.27099	0.878497
Ddx51	0.657308	0.209247	1.26292	0.878497
Cenpc	0.656345	0.191171	1.26984	0.878497
Hnrnpdl	0.65562	0.181445	1.26533	0.878497
Zfp808	0.654416	0.226987	1.26115	0.878497
Nat10	0.649628	0.250785	1.23728	0.878497
Lrrc59	0.649238	0.116578	1.17967	0.878497
Cwf19l2	0.6482	0.210219	1.26557	0.878497
Rpl3	0.648084	0.293452	1.18477	0.878497
Cdk11b	0.647714	0.314126	1.18382	0.878497
Setdb1	0.64745	0.236365	1.25184	0.878497
Ikzf5	0.646457	0.154306	1.27854	0.878497
Apobec3	0.645755	0.117113	1.17508	0.878497
Polr2g	0.644819	0.300051	1.19518	0.878497
Adnp2	0.644747	0.257782	1.22357	0.878497
Brwd3	0.64251	0.263428	1.2235	0.878497
Plrg1	0.642486	0.30982	1.19797	0.878497
Zc3hav1	0.641887	0.291738	1.18793	0.878497
Ercc2	0.640836	0.317169	1.18403	0.878497
Kif20a	0.639353	0.312612	1.18943	0.878497
Nol10	0.63865	0.222677	1.26985	0.878497
Tia1	0.637566	0.165636	1.25042	0.878497
Incenp	0.637369	0.25322	1.22639	0.878497
Cstf3	0.636531	0.318773	1.18444	0.878497
Hnrnpa0	0.63548	0.200597	1.2653	0.878497
Dis3	0.635426	0.195692	1.268	0.878497
Anapc1	0.635171	0.253132	1.22847	0.878497
Pus7	0.634967	0.317979	1.1852	0.878497
Npm3	0.634925	0.189596	1.27002	0.878497
Dhx33	0.633719	0.211434	1.26013	0.878497
Eed	0.633257	0.20143	1.26385	0.878497
Dppa4	0.633061	0.28482	1.20731	0.878497
Cenpv	0.632944	0.308043	1.1989	0.878497
Sin3a	0.630812	0.316693	1.18411	0.878497
Usp36	0.630688	0.296777	1.18811	0.878497
Prpf19	0.630643	0.322176	1.18049	0.878497
Rpl36	0.628811	0.160827	1.2877	0.878497
Rpf2	0.625741	0.31197	1.19463	0.878497
Ddx24	0.624535	0.31413	1.18196	0.878497
Srsf3	0.624212	0.149466	1.27394	0.878497
Ep400	0.623795	0.318968	1.18332	0.878497
Top3b	0.621682	0.310569	1.19892	0.878497
Hnrnpa2b1	0.621403	0.24221	1.24133	0.878497
Taf2	0.618994	0.314887	1.18107	0.878497
Cecr2	0.618878	0.312515	1.19096	0.878497
Ncl	0.617657	0.180064	1.26684	0.878497
Cstf1	0.616282	0.329897	1.17969	0.878497
Atox1	0.613278	0.144573	1.26862	0.878497
Rps24	0.609368	0.202178	1.26189	0.878497
Jarid2	0.607183	0.241476	1.25104	0.878497
Rsf1	0.603814	0.293507	1.18298	0.878497
Helz	0.603536	0.0908357	1.18037	0.878497
Supt16h	0.602373	0.340122	1.17389	0.878497
Atad2	0.601208	0.330758	1.1757	0.878497
Mylpf	0.599629	0.0561509	1.01929	0.878497
Rfxank	0.599496	0.341024	1.1736	0.878497
Wdr70	0.597884	0.341961	1.17005	0.878497
Nup98	0.596516	0.26538	1.21829	0.878497
Znf532	0.595314	0.333489	1.1714	0.878497
Trrap	0.594986	0.295647	1.18558	0.878497
Vwa9	0.593317	0.304236	1.20178	0.878497
Slc2a3	0.593208	0.311441	1.19646	0.878497
Zfp600	0.592952	0.312921	1.1887	0.878497
Cul4b	0.590095	0.258818	1.22603	0.878497
Nup155	0.59007	0.305874	1.20226	0.878497
Trim24	0.588964	0.2711	1.22795	0.878497
Nup85	0.588709	0.338081	1.17538	0.878497
Mphosph10	0.584828	0.351701	1.15998	0.878497
Elp2	0.583753	0.196816	1.26837	0.878497
Ldha	0.581831	0.179572	1.26712	0.878497
Kif22	0.581369	0.326556	1.18557	0.878497
Polr2a	0.578304	0.343576	1.16718	0.878497
Hdac1	0.577152	0.341225	1.16921	0.878497
Znf512	0.575936	0.314276	1.18065	0.878497
Parp1	0.575739	0.348595	1.16755	0.878497
Vrk1	0.575198	0.321775	1.18084	0.878497
Pcid2	0.572281	0.219413	1.2603	0.878497
Flnc	0.571101	0.358006	1.16622	0.878497
Gnl3	0.570459	0.316236	1.18427	0.878497
Mum1	0.568449	0.351663	1.16308	0.878497
Pop1	0.567744	0.360055	1.16333	0.878497
Topbp1	0.567205	0.355806	1.16223	0.878497
Kpna2	0.566305	0.163036	1.26699	0.878497
Rps23	0.565809	0.343083	1.16884	0.878497
Grwd1	0.563771	0.347837	1.16995	0.878497
Dnajc10	0.563686	0.3528	1.16199	0.878497
Nup93	0.561742	0.341068	1.17205	0.878497
Pes1	0.560782	0.183009	1.25779	0.878497
Syncrip	0.56025	0.230734	1.27011	0.878497
Numa1	0.559619	0.323229	1.18252	0.878497
L1td1	0.559578	0.0560069	1.0245	0.878497
Myof	0.557187	0.360864	1.16436	0.878497
Supt6h	0.55573	0.243455	1.23704	0.878497
Wdr12	0.554111	0.334934	1.16956	0.878497
Nup37	0.553513	0.363054	1.16197	0.878497
Eftud2	0.55241	0.313399	1.18673	0.878497
Kri1	0.551992	0.238384	1.25138	0.878497
Leng8	0.551442	0.138885	1.25577	0.878497
Heatr1	0.55135	0.286083	1.19983	0.878497
Aaas	0.549475	0.365894	1.16013	0.878497
Nacc1	0.548669	0.254161	1.22595	0.878497
Tmpo	0.548278	0.159658	1.28701	0.878497
Zfr	0.547868	0.223201	1.26374	0.878497
Raver1	0.54769	0.370832	1.16184	0.878497
Ubap2	0.547305	0.224	1.26225	0.878497
Polr1a	0.545347	0.335675	1.17043	0.878497
Tbl3	0.544729	0.261505	1.22655	0.878497
Ints4	0.54457	0.358926	1.16443	0.878497
Seh1l	0.543894	0.367446	1.1635	0.878497
Bptf	0.543233	0.348183	1.16781	0.878497
Mis18bp1	0.542323	0.303276	1.20198	0.878497
Baz1b	0.538602	0.303552	1.20108	0.878497
Lig3	0.538552	0.331668	1.17367	0.878497
Tbl1x	0.537975	0.267839	1.22016	0.878497
Taf5	0.536719	0.373177	1.15249	0.878497
Pcbp1	0.535029	0.307201	1.20152	0.878497
Gm340	0.531874	0.377531	1.15246	0.878497
Wapal	0.531148	0.157244	1.28497	0.878497
Gm6871	0.529966	0.222834	1.2677	0.878497
Utp20	0.529179	0.379959	1.14808	0.878497
Rfc4	0.528273	0.0581398	1.03176	0.878497
Ints1	0.527983	0.330924	1.17453	0.878497
Strbp	0.527159	0.33975	1.17602	0.878497
Rpl27a	0.525135	0.372044	1.15953	0.878497
Smarca1	0.524838	0.354108	1.16147	0.878497
Rfc5	0.523802	0.386575	1.14766	0.878497
Map4k4	0.523541	0.381663	1.1474	0.878497
Ddx31	0.523539	0.312329	1.19216	0.878497
Pdlim7	0.520813	0.379955	1.14953	0.878497
Top2b	0.519396	0.378038	1.15106	0.878497
Pogz	0.519206	0.321351	1.18293	0.878497
Cnot10	0.518967	0.256243	1.22359	0.878497
Xrn2	0.5187	0.291362	1.19048	0.878497
Ddx56	0.518391	0.349722	1.16313	0.878497
>sp|Q8VDP2|CX056_MOUSE	0.51689	0.387256	1.14825	0.878497
Top3a	0.51589	0.17596	1.25279	0.878497
Pold1	0.515183	0.0680341	1.09314	0.878497
Ndc1	0.510899	0.376306	1.15168	0.878497
Ears2	0.510614	0.394471	1.14257	0.878497
Rpl4	0.508938	0.395733	1.13929	0.878497
Gnl3l	0.507681	0.274526	1.22481	0.878497
Abcb7	0.503764	0.355256	1.16203	0.878497
Rfc1	0.50183	0.397509	1.14026	0.878497
Rbm33	0.500031	0.387857	1.14149	0.878497
Sun1	0.499208	0.279617	1.21782	0.878497
Kdm3a	0.498732	0.241777	1.24447	0.878497
Rrp7a	0.492322	0.32744	1.18516	0.878497
Gnl2	0.491747	0.40684	1.12235	0.878497
Tbk1	0.491381	0.243262	1.23871	0.878497
Wdr18	0.490949	0.404342	1.12988	0.878497
Senp3	0.488638	0.263872	1.22079	0.878497
Nup133	0.486014	0.343026	1.17032	0.878497
Adar	0.484675	0.32398	1.18163	0.878497
Adnp	0.483173	0.365128	1.16235	0.878497
Larp7	0.481175	0.404932	1.1302	0.878497
Kifc1	0.480652	0.361535	1.16337	0.878497
Iqgap3	0.479935	0.024663	0.849981	0.833695
Mdn1	0.479191	0.327175	1.18601	0.878497
Atrx	0.476617	0.300688	1.19571	0.878497
Stt3a	0.476553	0.215847	1.26425	0.878497
Cyr61	0.472644	0.231313	1.26742	0.878497
Maoa	0.471969	0.407393	1.12127	0.878497
Wdr5	0.469666	0.420978	1.11604	0.878497
Shprh	0.469335	0.418876	1.11419	0.878497
Chd4	0.468572	0.401568	1.13953	0.878497
Kif4	0.468414	0.189562	1.27338	0.878497
Kdm4a	0.467288	0.184695	1.26572	0.878497
Ppil1	0.466471	0.254309	1.21925	0.878497
Snip1	0.464743	0.385192	1.14929	0.878497
Wdr76	0.464578	0.423894	1.1163	0.878497
Cep192	0.464518	0.031448	0.934791	0.878497
Thoc1	0.463584	0.289329	1.19656	0.878497
Obfc1	0.463028	0.373001	1.15344	0.878497
Mybbp1a	0.45878	0.369226	1.1614	0.878497
Polr3a	0.458522	0.372062	1.15807	0.878497
Nle1	0.456928	0.319377	1.18299	0.878497
Lima1	0.454649	0.371868	1.16203	0.878497
Rpa2	0.453226	0.359284	1.16242	0.878497
Srcap	0.452927	0.157249	1.28061	0.878497
Uhrf1	0.452206	0.416154	1.11947	0.878497
Hp1bp3	0.451564	0.126166	1.19057	0.878497
Ubr7	0.451225	0.260769	1.22794	0.878497
Ccnk	0.451121	0.416951	1.11782	0.878497
Ino80	0.451093	0.430548	1.11409	0.878497
Slc25a20	0.447096	0.390799	1.14027	0.878497
Prpf8	0.444796	0.358027	1.16469	0.878497
Eif2a	0.444489	0.359136	1.16352	0.878497
Cpsf3	0.438811	0.437635	1.11186	0.878497
Med1	0.438449	0.430587	1.11297	0.878497
Chaf1b	0.438353	0.215429	1.26804	0.878497
Ruvbl2	0.43569	0.345044	1.16882	0.878497
Zdbf2	0.433641	0.403544	1.13431	0.878497
Brca1	0.43154	0.374397	1.15476	0.878497
Trmt1l	0.428565	0.314079	1.18552	0.878497
Cul2	0.427169	0.367914	1.16343	0.878497
Smarcd1	0.426146	0.446706	1.11	0.878497
Rcl1	0.422844	0.444845	1.11001	0.878497
Ppp2r5d	0.421373	0.134694	1.23193	0.878497
Akap1	0.419285	0.430077	1.11529	0.878497
Tbl2	0.419142	0.387691	1.14383	0.878497
Dock7	0.417642	0.344736	1.16945	0.878497
Rlf	0.414311	0.406481	1.12266	0.878497
42249	0.412705	0.285168	1.20236	0.878497
Wrnip1	0.410449	0.383922	1.14838	0.878497
Ssrp1	0.410365	0.144308	1.27098	0.878497
Capza2	0.410176	0.264762	1.22016	0.878497
Sp3	0.409885	0.236447	1.24949	0.878497
Cdca7l	0.407833	0.375494	1.15068	0.878497
Rbm4b	0.407677	0.0657338	1.08552	0.878497
Rae1	0.407386	0.451777	1.10641	0.878497
Mta3	0.404331	0.457927	1.10441	0.878497
Rpa1	0.403348	0.451694	1.10735	0.878497
Dcun1d5	0.403328	0.441895	1.11198	0.878497
Rnmt	0.403281	0.433981	1.11088	0.878497
Ttf2	0.402832	0.219724	1.25904	0.878497
Psip1	0.402534	0.232326	1.26424	0.878497
Carm1	0.400671	0.44166	1.11257	0.878497
Wdr43	0.400291	0.448551	1.10649	0.878497
Yeats4	0.399152	0.408025	1.12042	0.878497
Sgol2	0.397241	0.31856	1.1855	0.878497
Magohb	0.396184	0.278394	1.21919	0.878497
Lmnb1	0.395638	0.350895	1.16216	0.878497
Rpl5	0.393664	0.445994	1.11055	0.878497
Otud4	0.387898	0.381515	1.14986	0.878497
Cdk7	0.386706	0.377331	1.15333	0.878497
Loxl2	0.38585	0.270491	1.22753	0.878497
Pum1	0.385533	0.35291	1.16075	0.878497
Lancl1	0.384285	0.255536	1.22266	0.878497
Serbp1	0.382979	0.180509	1.2625	0.878497
Poldip3	0.382683	0.412994	1.11602	0.878497
Nop14	0.382012	0.474648	1.08949	0.878497
Tpr	0.381845	0.306818	1.202	0.878497
Pds5b	0.381039	0.473584	1.0902	0.878497
Nid2	0.380358	0.197829	1.26803	0.878497
Crnkl1	0.379513	0.480689	1.09595	0.878497
Ddb1	0.379188	0.443551	1.11028	0.878497
Senp1	0.378579	0.468946	1.09651	0.878497
Fmr1	0.378413	0.36808	1.16241	0.878497
Rbm3	0.377428	0.27136	1.22679	0.878497
Tbl1xr1	0.376033	0.478372	1.09276	0.878497
Kdm5b	0.375748	0.379696	1.15168	0.878497
L3mbtl2	0.372908	0.453361	1.1046	0.878497
Smarcad1	0.372739	0.149719	1.27154	0.878497
Zmynd8	0.37205	0.231067	1.269	0.878497
Prpf4	0.371818	0.441091	1.11232	0.878497
Phf6	0.371732	0.416924	1.11901	0.878497
Kdm6a	0.37057	0.4343	1.1105	0.878497
Map3k7	0.368887	0.243489	1.23458	0.878497
Rbm22	0.368203	0.48143	1.09449	0.878497
Eno3	0.368181	0.107747	1.1973	0.878497
Dnmt3l	0.36699	0.484	1.08992	0.878497
Mak16	0.365949	0.345699	1.16938	0.878497
Prpf31	0.365668	0.349371	1.16359	0.878497
Wdhd1	0.363889	0.431898	1.11273	0.878497
Ash2l	0.363255	0.473209	1.09251	0.878497
Znf281	0.361944	0.24614	1.23486	0.878497
Slc1a2	0.361755	0.0936534	1.18462	0.878497
Mcm3ap	0.361598	0.409186	1.11716	0.878497
Hells	0.361133	0.299745	1.19596	0.878497
Zmym2	0.360165	0.235479	1.25554	0.878497
Rpl7a	0.35968	0.383434	1.14837	0.878497
Pgam5	0.35858	0.448874	1.10614	0.878497
Sap130	0.356807	0.464164	1.10268	0.878497
Brd4	0.355844	0.472355	1.09479	0.878497
Prrc2c	0.355603	0.252872	1.22971	0.878497
Aurkb	0.351723	0.432812	1.11388	0.878497
Cox15	0.349031	0.466555	1.09848	0.878497
Ddx1	0.348487	0.43372	1.11261	0.878497
Parp1	0.347726	0.492682	1.08682	0.878497
Krt35	0.347296	0.0915874	1.18367	0.878497
Eif2s3x	0.345269	0.363845	1.16294	0.878497
Alg13	0.342957	0.204254	1.2616	0.878497
Nid1	0.340943	0.488923	1.08761	0.878497
Abcf1	0.339844	0.43756	1.11285	0.878497
Usp26	0.337674	0.454626	1.10429	0.878497
Pcf11	0.337365	0.205124	1.26043	0.878497
Ndst4	0.336087	0.0223112	0.855741	0.833695
Rbm8a	0.335241	0.236098	1.25322	0.878497
Thbs1	0.334922	0.330968	1.17294	0.878497
Ddx46	0.330489	0.212209	1.25531	0.878497
Msh6	0.329857	0.117332	1.17234	0.878497
Chtop	0.328905	0.284333	1.2139	0.878497
Krt39	0.328522	0.473483	1.09209	0.878497
Twistnb	0.326647	0.421252	1.11428	0.878497
Baz2b	0.324639	0.461031	1.10295	0.878497
Dnmt1	0.324237	0.40567	1.12697	0.878497
Rpl19	0.324103	0.242237	1.23879	0.878497
Lamc1	0.322597	0.133774	1.22824	0.878497
Kat6b	0.320302	0.490311	1.08663	0.878497
Pcgf6	0.318359	0.424963	1.11664	0.878497
Dip2a	0.317825	0.115754	1.19161	0.878497
Banp	0.317675	0.486376	1.08601	0.878497
Nlrp4f	0.317456	0.396221	1.13932	0.878497
Lrrc15	0.317175	0.497563	1.07957	0.878497
Sall4	0.316641	0.506346	1.07317	0.878497
Hltf	0.316589	0.512612	1.07495	0.878497
Hmmr	0.31602	0.277698	1.21839	0.878497
Prmt1	0.314717	0.399439	1.13756	0.878497
Smpd4	0.311993	0.437852	1.11122	0.878497
Pcca	0.310715	0.126308	1.1872	0.878497
Atf7ip	0.31045	0.430313	1.11469	0.878497
Fbln2	0.30679	0.110298	1.18683	0.878497
FRRS1	0.306213	0.27478	1.22364	0.878497
Ftsj3	0.304152	0.273085	1.22297	0.878497
Gabpa	0.303659	0.334707	1.17049	0.878497
Pip4k2c	0.300979	0.496375	1.08093	0.878497
Eif3d	0.300505	0.518407	1.07572	0.878497
Aurkc	0.299154	0.205088	1.26347	0.878497
Eif2s1	0.297699	0.47373	1.08949	0.878497
Ddx39a	0.297587	0.423238	1.11581	0.878497
Melk	0.297505	0.502698	1.07405	0.878497
Upf2	0.294714	0.458107	1.10373	0.878497
Orc2	0.293961	0.483933	1.0908	0.878497
D1Pas1	0.293826	0.294244	1.18395	0.878497
4732456N10Rik	0.293079	0.454082	1.1041	0.878497
Gap43	0.292969	0.115808	1.18194	0.878497
Htatsf1	0.292207	0.485121	1.08832	0.878497
Ppp1ca	0.291521	0.525491	1.07633	0.878497
Ccar2	0.291415	0.475426	1.08918	0.878497
Vars	0.289786	0.492907	1.08531	0.878497
Exosc8	0.288179	0.408727	1.12105	0.878497
Rpl36a	0.288172	0.467378	1.09825	0.878497
Ktn1	0.287512	0.330535	1.17666	0.878497
Ncbp3	0.285931	0.323365	1.1812	0.878497
Fads1	0.283392	0.402322	1.13625	0.878497
Xab2	0.282425	0.462365	1.10281	0.878497
Snrnp40	0.282057	0.443044	1.11252	0.878497
Dnajc13	0.281843	0.514652	1.07449	0.878497
Rps6	0.279342	0.425184	1.11599	0.878497
Slc25a4	0.278267	0.492844	1.08618	0.878497
Tpm3	0.277795	0.108188	1.19107	0.878497
Pola2	0.277459	0.529125	1.07177	0.878497
Herc4	0.275392	0.518857	1.07384	0.878497
Ghitm	0.27395	0.443335	1.11091	0.878497
Pml	0.273204	0.395105	1.14163	0.878497
Slc2a1	0.272038	0.22399	1.2652	0.878497
Arl14ep	0.26817	0.494732	1.08531	0.878497
Ubtf	0.26671	0.349051	1.16579	0.878497
Tomm40	0.266661	0.529998	1.0708	0.878497
Zfp219	0.266416	0.536111	1.06952	0.878497
Coro1c	0.265339	0.503926	1.07474	0.878497
Mad1l1	0.260817	0.471642	1.09742	0.878497
Ndufs2	0.260531	0.455942	1.10298	0.878497
Pc	0.259787	0.514434	1.07498	0.878497
Gsn	0.257258	0.460368	1.10358	0.878497
FAM120A	0.256157	0.254224	1.22378	0.878497
Rpl21	0.252605	0.518812	1.07468	0.878497
Thoc3	0.252458	0.46744	1.09731	0.878497
Fxr1	0.250257	0.374454	1.15344	0.878497
Polr3b	0.249304	0.506658	1.07287	0.878497
Rps15a	0.246699	0.398926	1.13746	0.878497
Kmt2a	0.242573	0.473006	1.09417	0.878497
Tcp1	0.242185	0.504257	1.07352	0.878497
Pdk3	0.241328	0.387365	1.14572	0.878497
Gpx4	0.23925	0.549121	1.05563	0.878497
Decr1	0.238398	0.506733	1.07207	0.878497
Hcfc1	0.233839	0.553259	1.05252	0.878497
Smu1	0.231777	0.403149	1.13589	0.878497
Arid2	0.231419	0.534103	1.07091	0.878497
Rbbp7	0.229179	0.552249	1.05482	0.878497
Rtcb	0.228326	0.494487	1.08577	0.878497
Rbm39	0.228149	0.361269	1.16409	0.878497
Znf143	0.227566	0.546682	1.05864	0.878497
Prmt3	0.226919	0.537814	1.06666	0.878497
Pof1b	0.226722	0.196904	1.26551	0.878497
Gtf3c4	0.22657	0.539465	1.06549	0.878497
Gtf3c1	0.224289	0.495156	1.08324	0.878497
Tp53bp1	0.223499	0.235209	1.25692	0.878497
Fndc3b	0.223106	0.498157	1.07987	0.878497
Znf518b	0.220268	0.562421	1.05227	0.878497
Lsm12	0.220021	0.536561	1.06684	0.878497
Emb	0.219983	0.448366	1.10718	0.878497
Rpl10l	0.218318	0.559422	1.05664	0.878497
Eif1ax	0.216813	0.50058	1.07727	0.878497
Taok2	0.216776	0.488925	1.0866	0.878497
Ctbp2	0.215836	0.371837	1.16346	0.878497
Kpna3	0.21525	0.438984	1.11053	0.878497
Serpine2	0.21406	0.474865	1.08894	0.878497
Nub1	0.213951	0.0462389	0.973062	0.878497
Usp48	0.212633	0.381653	1.14883	0.878497
Sec13	0.211963	0.552631	1.05301	0.878497
Usp7	0.211773	0.567116	1.04786	0.878497
Hspg2	0.209752	0.560912	1.05526	0.878497
Dhx40	0.209314	0.428881	1.11952	0.878497
Rpn2	0.20924	0.145611	1.27303	0.878497
Ikbkap	0.208416	0.332355	1.17435	0.878497
Exosc1	0.207906	0.566554	1.04846	0.878497
Dhx30	0.207442	0.565934	1.05058	0.878497
Nol6	0.205352	0.568083	1.04802	0.878497
Rpl32	0.205197	0.484729	1.0895	0.878497
Emsy	0.204782	0.543286	1.06245	0.878497
Glyr1	0.202962	0.473539	1.09116	0.878497
Rbm5	0.201908	0.284798	1.20937	0.878497
Spen	0.201868	0.405504	1.12782	0.878497
Nup43	0.201245	0.429528	1.1163	0.878497
Sap30bp	0.201046	0.571456	1.04212	0.878497
Pno1	0.197132	0.569152	1.04837	0.878497
Setx	0.195654	0.514196	1.07543	0.878497
Rtel1	0.195244	0.290077	1.19137	0.878497
Asun	0.195072	0.387357	1.14712	0.878497
Terf1	0.193523	0.157464	1.27798	0.878497
Gtpbp1	0.192869	0.509624	1.07628	0.878497
Rpl8	0.192005	0.57501	1.03667	0.878497
Rbbp4	0.190227	0.573578	1.03961	0.878497
Rfx1	0.188808	0.55893	1.05655	0.878497
Mcm2	0.188241	0.340018	1.17524	0.878497
Tpp2	0.187351	0.558464	1.05651	0.878497
Sugt1	0.18618	0.377956	1.15228	0.878497
Mtpap	0.186036	0.569374	1.04715	0.878497
Trim25	0.185349	0.501033	1.07532	0.878497
Pola1	0.185181	0.505474	1.07227	0.878497
Dpp3	0.183906	0.39826	1.14104	0.878497
Rad21	0.180929	0.188248	1.27174	0.878497
Tra2b	0.180321	0.573143	1.04041	0.878497
Kif11	0.176231	0.462652	1.10239	0.878497
Inpp5d	0.175307	0.582203	1.03319	0.878497
>sp|Q8CIL4|CA131_MOUSE	0.175101	0.545724	1.05851	0.878497
Rpl28	0.174719	0.530116	1.07013	0.878497
Itpr3	0.174687	0.112102	1.17955	0.878497
Crabp2	0.17312	0.210864	1.26625	0.878497
Tmem209	0.172002	0.536475	1.06756	0.878497
Kat7	0.170839	0.197892	1.26502	0.878497
Rfc2	0.170483	0.483738	1.09243	0.878497
Smc3	0.169133	0.578731	1.03553	0.878497
Sec61a1	0.169116	0.578253	1.0378	0.878497
Ap2a1	0.168245	0.537701	1.06732	0.878497
Lbr	0.166404	0.58089	1.03472	0.878497
Rpl23	0.163402	0.574818	1.03712	0.878497
Wdr61	0.162658	0.470762	1.0986	0.878497
Usp24	0.160723	0.56192	1.05465	0.878497
Znrd1	0.159918	0.584855	1.02945	0.878497
Atad1	0.158547	0.391888	1.13925	0.878497
Ankfy1	0.158009	0.523823	1.07755	0.878497
Slc27a4	0.157334	0.594145	1.02013	0.878497
Abcf3	0.153848	0.368852	1.16176	0.878497
Ap1b1	0.150839	0.508896	1.07569	0.878497
Dnajc7	0.150659	0.346174	1.16932	0.878497
Acd	0.150648	0.595178	1.01823	0.878497
Rad50	0.150245	0.408892	1.12021	0.878497
Esrp1	0.149951	0.517083	1.07579	0.878497
Ubxn4	0.149141	0.32047	1.18335	0.878497
Prpf3	0.147341	0.435179	1.11036	0.878497
Prdx1	0.145999	0.584207	1.02983	0.878497
Hspb1	0.144518	0.101339	1.18711	0.878497
Pbdc1	0.144229	0.452124	1.10612	0.878497
Gldc	0.143385	0.510711	1.0738	0.878497
Nom1	0.140606	0.416128	1.12067	0.878497
Ddx49	0.140175	0.411307	1.11909	0.878497
Dock6	0.138816	0.284977	1.20369	0.878497
Iws1	0.1388	0.473115	1.09336	0.878497
Sntb2	0.138355	0.570168	1.047	0.878497
Kif2c	0.137876	0.429088	1.11883	0.878497
Ogt	0.137022	0.519684	1.07462	0.878497
Aurka	0.136331	0.328986	1.18176	0.878497
Rcor2	0.135587	0.495758	1.08256	0.878497
Fxr2	0.135547	0.537924	1.06599	0.878497
Nup107	0.135305	0.511156	1.07379	0.878497
Larp4	0.132648	0.535965	1.07013	0.878497
Wdtc1	0.132391	0.184809	1.26286	0.878497
Arl8b	0.130152	0.501919	1.07432	0.878497
Mrpl37	0.129981	0.545643	1.05922	0.878497
Rps16	0.128871	0.54334	1.06168	0.878497
Bzw1	0.128847	0.449142	1.10451	0.878497
Kif1b	0.12873	0.606916	1.01637	0.878497
Polr2l	0.12868	0.349211	1.16469	0.878497
Ptpn1	0.125714	0.54872	1.05742	0.878497
Mcm5	0.12553	0.498394	1.07842	0.878497
Krt76	0.125004	0.251855	1.23233	0.878497
Las1l	0.12387	0.581869	1.03337	0.878497
Igf2bp1	0.123198	0.570127	1.04773	0.878497
Eefsec	0.123174	0.182496	1.2579	0.878497
Qki	0.122532	0.416408	1.11889	0.878497
Alb	0.120111	0.156986	1.28729	0.878497
Ppp1cb	0.118797	0.531326	1.06985	0.878497
Thoc6	0.118544	0.539551	1.06477	0.878497
Ubr5	0.118364	0.50214	1.07382	0.878497
Api5	0.115783	0.272041	1.2229	0.878497
Slc9a1	0.113186	0.165283	1.25173	0.878497
Lig1	0.112275	0.405732	1.12582	0.878497
Npm1	0.112258	0.588377	1.02503	0.878497
Mtor	0.112167	0.609788	1.01688	0.878497
Rpl12	0.112066	0.41807	1.11454	0.878497
Xrcc1	0.108605	0.590716	1.02385	0.878497
Erlin1	0.1077	0.333524	1.16979	0.878497
Morf4l1	0.107061	0.586651	1.02956	0.878497
Ppp1cc	0.10706	0.330444	1.1781	0.878497
Atad3	0.107044	0.485465	1.08806	0.878497
Pccb	0.10513	0.591496	1.02296	0.878497
Ap2m1	0.105118	0.429115	1.11767	0.878497
Farsb	0.102713	0.409144	1.11833	0.878497
Nubp2	0.102605	0.126152	1.19518	0.878497
Fundc2	0.100999	0.616042	1.00684	0.878497
Mettl16	0.100198	0.592182	1.02192	0.878497
Fermt2	0.0989138	0.587422	1.02864	0.878497
Ercc6l	0.0988342	0.154449	1.27528	0.878497
Ptk7	0.0948684	0.615203	1.00893	0.878497
Srm	0.0937391	0.618979	1.00268	0.878497
Strn4	0.0930239	0.50176	1.07591	0.878497
Rab1b	0.0921586	0.615713	1.00907	0.878497
Krt18	0.0904472	0.337914	1.17652	0.878497
Prps1	0.0896855	0.618119	1.00402	0.878497
Krt84	0.0868018	0.585684	1.03014	0.878497
Hdac3	0.0857676	0.622094	1.00023	0.878497
Pot1	0.0843696	0.404118	1.13058	0.878497
Msh2	0.0824015	0.451534	1.1081	0.878497
Ppil2	0.081127	0.62381	1.00028	0.878497
Actl6a	0.0809172	0.566935	1.04834	0.878497
Pycr2	0.0803974	0.583708	1.03201	0.878497
Dpf2	0.0800588	0.562119	1.05336	0.878497
Smc1a	0.0798916	0.425526	1.11443	0.878497
Rpl34	0.0797611	0.625045	0.997555	0.878497
Obsl1	0.0793233	0.365121	1.16389	0.878497
Tle3	0.0779423	0.591902	1.02218	0.878497
Pard3	0.0772724	0.226207	1.2657	0.878497
Tomm22	0.0762261	0.21546	1.2651	0.878497
Gnb1	0.0755998	0.521863	1.07631	0.878497
Mkrn2	0.0719448	0.447213	1.10894	0.878497
Crlf3	0.0715227	0.540502	1.06312	0.878497
Emc7	0.0697656	0.123945	1.19329	0.878497
Znf622	0.0674374	0.627369	0.995916	0.878497
Ralb	0.0670399	0.610013	1.01655	0.878497
Plbd1	0.0668491	0.162488	1.27104	0.878497
Pa2g4	0.0646591	0.276087	1.21806	0.878497
Armc10	0.0645124	0.37974	1.15035	0.878497
Hbb-b2	0.0635361	0.106255	1.20321	0.878497
Krt81	0.0634897	0.624395	0.9992	0.878497
Mcm4	0.0629412	0.347847	1.16833	0.878497
Nmt2	0.0628785	0.140643	1.26207	0.878497
Chd1l	0.062363	0.572193	1.04027	0.878497
Wdr74	0.0620848	0.632037	0.990761	0.878497
Tnpo3	0.0618317	0.606586	1.01653	0.878497
Mad2l1	0.0605283	0.611834	1.01178	0.878497
Anxa7	0.0584711	0.573718	1.03828	0.878497
Phb	0.0583304	0.277428	1.21945	0.878497
Mtrf1	0.058251	0.556621	1.0547	0.878497
Mtch2	0.0576619	0.624417	0.998564	0.878497
Nmd3	0.0547048	0.581142	1.0344	0.878497
G3bp2	0.0543974	0.62433	0.999769	0.878497
Bub3	0.052732	0.40592	1.12503	0.878497
Tmem43	0.0521761	0.286369	1.19892	0.878497
Lama5	0.0512332	0.394732	1.14194	0.878497
Hnrnph1	0.0503705	0.433968	1.11204	0.878497
Polr2b	0.0494164	0.588142	1.02612	0.878497
Galk1	0.0468418	0.358853	1.16578	0.878497
Rpl30	0.0466555	0.552073	1.05618	0.878497
Dppa2	0.0455698	0.627761	0.99521	0.878497
Krt72	0.0450665	0.453369	1.10349	0.878497
Vdac2	0.044156	0.630221	0.993152	0.878497
Wdr6	0.0414864	0.587912	1.02647	0.878497
Rnf17	0.0407749	0.195188	1.27166	0.878497
Mark2	0.0396994	0.573049	1.04103	0.878497
Trim33	0.0387859	0.613971	1.0097	0.878497
Kars	0.0351795	0.625661	0.996531	0.878497
Ctgf	0.0344783	0.463048	1.10223	0.878497
Xpo7	0.0324181	0.590697	1.02531	0.878497
Rps3	0.0324041	0.602516	1.01905	0.878497
Trmt10c	0.0319862	0.476866	1.09037	0.878497
Hnrnpab	0.0309776	0.543581	1.06128	0.878497
Mbnl1	0.030179	0.484717	1.0905	0.878497
Agk	0.0287853	0.389767	1.14006	0.878497
Krt77	0.0275397	0.311321	1.19793	0.878497
Arf4	0.0261163	0.187833	1.27256	0.878497
Hdgfrp2	0.0252182	0.252151	1.23124	0.878497
Mrpl9	0.0240743	0.593869	1.02039	0.878497
Rpl9	0.0240421	0.640765	0.98179	0.878497
Eif4a3	0.0227097	0.605708	1.01721	0.878497
Dennd4c	0.0198104	0.40897	1.11914	0.878497
Lsm2	0.0185766	0.458612	1.10383	0.878497
Anxa6	0.0181466	0.616432	1.0054	0.878497
Ints5	0.0173071	0.560189	1.05557	0.878497
Rps4x	0.0158436	0.559751	1.05558	0.878497
Psmd1	0.0157391	0.628349	0.993493	0.878497
Iars	0.0156353	0.308823	1.19801	0.878497
Pold2	0.0146869	0.628302	0.99408	0.878497
Ebna1bp2	0.0143197	0.292336	1.1863	0.878497
Gphn	0.0140965	0.348657	1.16611	0.878497
Gna11	0.012333	0.633861	0.989056	0.878497
Igf2bp3	0.0122658	0.570601	1.04376	0.878497
Zfp57	0.0122503	0.510463	1.07518	0.878497
Abcd3	0.0102881	0.625927	0.994956	0.878497
Cpsf3l	0.0092295	0.621458	1.00192	0.878497
Pcm1	0.00624979	0.365592	1.16072	0.878497
Dhrs4	0.00090735	0.548876	1.05601	0.878497
Snta1	0.000887983	0.644072	0.97866	0.878497
Ddx50	0.000783221	0.391787	1.14035	0.878497
Igf2bp2	0.000662376	0.63261	0.989702	0.878497
Lefty2	0.000142143	0.245764	1.23819	0.878497
Tns3	-3.16768e-05	0.618387	1.00309	0.878497
H2afy	-0.00054801	0.429798	1.11579	0.878497
Nedd4	-0.00193183	0.2915	1.189	0.878497
Gars	-0.00211604	0.637579	0.985802	0.878497
Prpf4b	-0.00287016	0.333246	1.17228	0.878497
Wipi2	-0.00323619	0.592973	1.02106	0.878497
Blm	-0.00330039	0.637966	0.985119	0.878497
Mrpl30	-0.00441632	0.580307	1.03446	0.878497
Arid1a	-0.00505318	0.587611	1.0267	0.878497
Tns1	-0.00564866	0.63735	0.986088	0.878497
Lrrc40	-0.00593083	0.629351	0.993097	0.878497
Cdk2	-0.0062191	0.657347	0.973939	0.878497
Rpl37a	-0.00648938	0.612899	1.01143	0.878497
Taf5l	-0.00905261	0.245891	1.23621	0.878497
Nop9	-0.0126789	0.662197	0.969048	0.878497
Farsa	-0.0140156	0.308208	1.19758	0.878497
Ascc3	-0.0143031	0.592882	1.02165	0.878497
Ass1	-0.0144265	0.0902845	1.18617	0.878497
Krr1	-0.0157436	0.520034	1.07441	0.878497
Gprasp1	-0.0157587	0.648372	0.97646	0.878497
Sbds	-0.0162608	0.603446	1.01845	0.878497
Itpr1	-0.0164813	0.662972	0.966022	0.878497
Calr	-0.0187644	0.654598	0.974725	0.878497
Exoc4	-0.0188063	0.639158	0.985679	0.878497
Psmd12	-0.0191655	0.385397	1.14703	0.878497
Krt5	-0.0192356	0.289632	1.1916	0.878497
Rpl26	-0.0197123	0.647742	0.977367	0.878497
Sf3b2	-0.0198397	0.402125	1.13704	0.878497
Tbrg4	-0.0204667	0.643363	0.980088	0.878497
Rps11	-0.0205114	0.613045	1.01097	0.878497
Cct2	-0.0210797	0.640485	0.984533	0.878497
Myo1b	-0.0250416	0.662972	0.966614	0.878497
Pds5a	-0.0253569	0.640478	0.98516	0.878497
Ckap5	-0.0256853	0.599003	1.01745	0.878497
Gtf2i	-0.0275821	0.610605	1.01398	0.878497
Setd1a	-0.0288	0.601729	1.01989	0.878497
Prune	-0.0292743	0.648139	0.976727	0.878497
Tamm41	-0.0293216	0.668466	0.968096	0.878497
Hk2	-0.0299606	0.430987	1.1128	0.878497
Fkbp5	-0.0313777	0.198261	1.26398	0.878497
Rpl18a	-0.0318142	0.58255	1.03304	0.878497
Gnb2l1	-0.0321266	0.512296	1.07523	0.878497
Asns	-0.0325087	0.368662	1.1627	0.878497
Bdh1	-0.0326846	0.610574	1.01464	0.878497
Plekha2	-0.0331474	0.333726	1.16878	0.878497
Llgl1	-0.0341219	0.634556	0.988196	0.878497
Kdm5c	-0.036851	0.488072	1.08674	0.878497
Tjp2	-0.0368663	0.566421	1.04903	0.878497
Capzb	-0.0376781	0.28484	1.20525	0.878497
Eif3l	-0.0385453	0.642932	0.98006	0.878497
Hmgb2	-0.0397335	0.361833	1.16276	0.878497
Nsun2	-0.0398223	0.529282	1.07118	0.878497
Usp3	-0.0400041	0.624621	0.998219	0.878497
Set	-0.0412524	0.16128	1.28269	0.878497
Polrmt	-0.0434561	0.495196	1.08233	0.878497
Rfc3	-0.0463655	0.64117	0.981146	0.878497
Rars	-0.0468358	0.674671	0.95726	0.878497
Polr1c	-0.0472384	0.571161	1.04318	0.878497
Cct6a	-0.0481783	0.656622	0.974078	0.878497
Cdk16	-0.048604	0.646061	0.977311	0.878497
Dars	-0.0504005	0.593	1.02037	0.878497
Usp10	-0.0510637	0.611105	1.01269	0.878497
Dcaf7	-0.0512419	0.659785	0.971498	0.878497
Nrf1	-0.0519614	0.674454	0.957524	0.878497
Tfrc	-0.052092	0.598922	1.01804	0.878497
Gart	-0.0524009	0.407197	1.12203	0.878497
Orc3	-0.0524841	0.493292	1.08515	0.878497
Mettl8	-0.0530455	0.594717	1.01817	0.878497
Fn1	-0.0535689	0.674065	0.959262	0.878497
Myom3	-0.0539253	0.581172	1.03368	0.878497
Ndc80	-0.0541654	0.623929	0.9998	0.878497
Rpn1	-0.055484	0.596656	1.02002	0.878497
Dmap1	-0.0559763	0.662507	0.967716	0.878497
Col1a1	-0.0566549	0.210938	1.2635	0.878497
Nudt9	-0.0580909	0.618524	1.00262	0.878497
Src	-0.0581758	0.621481	1.0006	0.878497
Trim28	-0.0582117	0.648754	0.974565	0.878497
Dsp	-0.0587757	0.389285	1.14005	0.878497
Polr1b	-0.0596452	0.679291	0.952449	0.878497
Cdk9	-0.0607825	0.67956	0.951145	0.878497
Dtymk	-0.0617975	0.525649	1.07573	0.878497
Faf1	-0.0622585	0.583752	1.03132	0.878497
Pcna	-0.0623667	0.673543	0.960242	0.878497
Rpl38	-0.0626734	0.594343	1.019	0.878497
Upp1	-0.0629451	0.186103	1.26806	0.878497
Dsg1a	-0.0631215	0.306707	1.20355	0.878497
Aifm1	-0.0669376	0.676898	0.956425	0.878497
Rragc	-0.0675703	0.500958	1.07613	0.878497
Angel2	-0.0680648	0.677313	0.955876	0.878497
Lgalsl	-0.0685188	0.241725	1.2469	0.878497
Dynll2	-0.0699587	0.304701	1.19963	0.878497
Vdac3	-0.0707974	0.673472	0.960718	0.878497
Eras	-0.0708431	0.232967	1.25622	0.878497
Pnn	-0.0716925	0.309801	1.19985	0.878497
Xrcc5	-0.0723586	0.677823	0.953766	0.878497
Hn1l	-0.0731793	0.417354	1.11513	0.878497
Fpgs	-0.0736743	0.570355	1.04411	0.878497
Cul4a	-0.0751005	0.202547	1.25431	0.878497
H1fx	-0.0758553	0.343112	1.16727	0.878497
Mipep	-0.0763264	0.675007	0.956596	0.878497
Dnaja3	-0.076567	0.57758	1.03816	0.878497
Arhgef18	-0.0777877	0.661756	0.970793	0.878497
Rpl13a	-0.0791088	0.457736	1.10507	0.878497
Mrpl3	-0.0810162	0.467858	1.09612	0.878497
Eftud1	-0.0815748	0.629146	0.993433	0.878497
Mcm6	-0.0815857	0.391944	1.13803	0.878497
Sf3b1	-0.0820115	0.414511	1.11885	0.878497
Kntc1	-0.0822915	0.332594	1.17346	0.878497
Acta2	-0.0836772	0.268641	1.22147	0.878497
Smc2	-0.0841737	0.624997	0.998148	0.878497
Snd1	-0.0843138	0.650688	0.972555	0.878497
Matr3	-0.086029	0.409513	1.11677	0.878497
Trip13	-0.0871646	0.545085	1.06073	0.878497
Dync1i2	-0.0874509	0.433212	1.11371	0.878497
Dcp1a	-0.0879074	0.675529	0.955626	0.878497
Jup	-0.0883416	0.499629	1.07815	0.878497
Ddx39b	-0.0888823	0.545015	1.06233	0.878497
Pura	-0.0898515	0.378417	1.15074	0.878497
Acadl	-0.0909104	0.684556	0.950862	0.878497
Nhp2l1	-0.0927714	0.291062	1.1913	0.878497
Rpl11	-0.0948963	0.670417	0.9668	0.878497
Ppwd1	-0.0950309	0.568857	1.04864	0.878497
Rnh1	-0.0954853	0.385144	1.15059	0.878497
Ndrg1	-0.0957579	0.247482	1.23378	0.878497
Ddx28	-0.0958142	0.618255	1.00356	0.878497
Ap2b1	-0.0959294	0.676909	0.955872	0.878497
Krt32	-0.0967283	0.408016	1.12169	0.878497
Sart3	-0.0968773	0.552565	1.05373	0.878497
Ube2i	-0.0971148	0.104672	1.20247	0.878497
Prpf6	-0.0983253	0.386526	1.14895	0.878497
Ranbp3	-0.0983454	0.648535	0.974853	0.878497
Opa1	-0.0984409	0.555275	1.05467	0.878497
Ddx3x	-0.0994493	0.649344	0.972993	0.878497
Rpl24	-0.100366	0.611233	1.01219	0.878497
RtcA	-0.101549	0.582843	1.03279	0.878497
Nob1	-0.103739	0.536976	1.06677	0.878497
Cep55	-0.104082	0.436914	1.11359	0.878497
Ppie	-0.104108	0.448096	1.10882	0.878497
Mars	-0.104263	0.387515	1.14473	0.878497
Drg1	-0.105141	0.569273	1.04778	0.878497
Eif2d	-0.106998	0.443077	1.11143	0.878497
Pycr1	-0.107016	0.658095	0.973833	0.878497
Tm9sf4	-0.107156	0.246962	1.23637	0.878497
Gnb2	-0.108386	0.465437	1.09803	0.878497
Ubp1	-0.108803	0.6698	0.967082	0.878497
Ap1m1	-0.10902	0.661849	0.970331	0.878497
Gapdh	-0.109222	0.684879	0.9502	0.878497
Vdac1	-0.109346	0.692878	0.950758	0.878497
Csde1	-0.1116	0.666564	0.967697	0.878497
Ap3d1	-0.112509	0.632117	0.990234	0.878497
Evi5	-0.112595	0.656314	0.974228	0.878497
Smc4	-0.113822	0.526538	1.07477	0.878497
Cnn3	-0.115516	0.636385	0.98781	0.878497
Rras2	-0.116171	0.534179	1.07016	0.878497
Znf687	-0.116536	0.55235	1.05416	0.878497
Rrm1	-0.116907	0.678565	0.953681	0.878497
Hint2	-0.117007	0.688716	0.949429	0.878497
Gtpbp10	-0.119722	0.681723	0.951372	0.878497
Ptpn6	-0.120547	0.629839	0.993208	0.878497
Erlin2	-0.120686	0.224486	1.25903	0.878497
Mrpl15	-0.120951	0.672958	0.963452	0.878497
Map4k5	-0.121134	0.640416	0.985702	0.878497
Qrsl1	-0.12268	0.64845	0.975958	0.878497
Nipsnap1	-0.124275	0.242055	1.24321	0.878497
Clpb	-0.125849	0.700973	0.946572	0.878497
Usp28	-0.12672	0.346544	1.16891	0.878497
Slc25a13	-0.127081	0.671315	0.965751	0.878497
Fbxo15	-0.128162	0.182446	1.26121	0.878497
Blmh	-0.128714	0.136057	1.23963	0.878497
Txn	-0.128755	0.33814	1.17387	0.878497
Etfdh	-0.129014	0.55301	1.05289	0.878497
Men1	-0.129398	0.686059	0.949068	0.878497
Cct3	-0.130447	0.643924	0.979061	0.878497
Ncapd2	-0.130538	0.365333	1.16145	0.878497
Eif3h	-0.132177	0.681431	0.951523	0.878497
Mrps5	-0.133374	0.485755	1.08769	0.878497
Uba2	-0.133461	0.691152	0.949486	0.878497
Naa25	-0.134199	0.701821	0.944499	0.878497
Krt85	-0.134574	0.424619	1.11697	0.878497
Arl1	-0.135725	0.682553	0.951414	0.878497
Nup54	-0.135793	0.694823	0.950684	0.878497
Racgap1	-0.137426	0.631375	0.990376	0.878497
Cnot1	-0.137577	0.578972	1.03441	0.878497
Mlh1	-0.137795	0.540116	1.06412	0.878497
Acot7	-0.138123	0.340306	1.17282	0.878497
Atp6v0d1	-0.138972	0.529917	1.07155	0.878497
Mapk14	-0.139619	0.699778	0.947649	0.878497
Arg1	-0.140026	0.304239	1.1998	0.878497
Xpo5	-0.141424	0.673096	0.96307	0.878497
Dhfr	-0.141586	0.616996	1.00494	0.878497
Rps2	-0.14259	0.573417	1.04011	0.878497
Strap	-0.145432	0.53645	1.06841	0.878497
Tefm	-0.145581	0.685913	0.949418	0.878497
Hnrnpll	-0.145682	0.364189	1.16247	0.878497
Srp68	-0.147354	0.5846	1.02976	0.878497
Vim	-0.147979	0.293042	1.18714	0.878497
Mvd	-0.148526	0.510375	1.07595	0.878497
Sipa1l1	-0.149773	0.587226	1.02981	0.878497
Rpl10a	-0.14997	0.44513	1.10956	0.878497
Phf8	-0.150528	0.599811	1.0181	0.878497
Pdpk1	-0.151214	0.411523	1.11713	0.878497
Irf2bp1	-0.152126	0.391432	1.14072	0.878497
Lamb1	-0.152244	0.555443	1.05415	0.878497
Mrps33	-0.152687	0.672796	0.963801	0.878497
Krt23	-0.152814	0.339041	1.17528	0.878497
Guf1	-0.153099	0.565686	1.05176	0.878497
Rbm12	-0.154151	0.686423	0.94902	0.878497
Caprin1	-0.156022	0.560694	1.05569	0.878497
Exoc8	-0.156181	0.705447	0.944037	0.878497
Bclaf1	-0.157954	0.272114	1.22092	0.878497
Krt2	-0.158684	0.3795	1.15256	0.878497
Far1	-0.159367	0.56431	1.05167	0.878497
Mcm7	-0.159496	0.63049	0.992918	0.878497
Hbs1l	-0.15951	0.701796	0.945001	0.878497
Fkbp4	-0.160457	0.709789	0.940322	0.878497
Fmn2	-0.160915	0.705782	0.942892	0.878497
Eprs	-0.161559	0.710364	0.93847	0.878497
Atp13a1	-0.161663	0.614732	1.00955	0.878497
Chordc1	-0.163905	0.69717	0.949525	0.878497
Aldh18a1	-0.164786	0.482893	1.09468	0.878497
Vcpip1	-0.166206	0.707836	0.941406	0.878497
Oxnad1	-0.166627	0.517656	1.07604	0.878497
Map2k2	-0.171093	0.266079	1.21914	0.878497
Rpl15	-0.171671	0.667519	0.968493	0.878497
Exoc2	-0.17597	0.714187	0.936754	0.878497
Hars2	-0.176169	0.574521	1.03815	0.878497
Myo1c	-0.177242	0.673427	0.96123	0.878497
Ipo9	-0.177519	0.573742	1.03754	0.878497
Stoml2	-0.17877	0.293248	1.18596	0.878497
Nek9	-0.1793	0.403836	1.13112	0.878497
Cenpe	-0.179735	0.670768	0.966134	0.878497
Xrcc6	-0.180608	0.593122	1.01984	0.878497
Pmpca	-0.182648	0.699882	0.947251	0.878497
Hnrnpa1	-0.183984	0.321535	1.18178	0.878497
Ddx19a	-0.184024	0.717535	0.935983	0.878497
Kif2a	-0.18525	0.681376	0.952005	0.878497
Upf1	-0.186822	0.564643	1.05147	0.878497
Ndufs7	-0.188389	0.696613	0.949854	0.878497
Bckdhb	-0.190104	0.532227	1.07076	0.878497
Dad1	-0.190445	0.71532	0.936176	0.878497
>sp|Q3TQQ9|CA112_MOUSE	-0.193419	0.664031	0.965789	0.878497
Top1	-0.193871	0.577403	1.03863	0.878497
Eif5b	-0.194743	0.697769	0.94871	0.878497
Heatr3	-0.194809	0.620054	1.00237	0.878497
Mpp6	-0.195679	0.723584	0.931105	0.878497
Mrpl11	-0.195992	0.721816	0.932869	0.878497
Hdac6	-0.196134	0.587596	1.02743	0.878497
Acsl3	-0.196478	0.721136	0.933512	0.878497
Copg2	-0.197221	0.164096	1.25878	0.878497
Etf1	-0.197272	0.720314	0.933973	0.878497
Hmgcs1	-0.198275	0.613481	1.01029	0.878497
Osbpl8	-0.198734	0.4839	1.09176	0.878497
Necap1	-0.199669	0.72266	0.931934	0.878497
Vapa	-0.201822	0.370204	1.1614	0.878497
Mtif2	-0.20221	0.526004	1.0746	0.878497
Dnajc2	-0.20327	0.725298	0.930792	0.878497
Rps17	-0.204875	0.231847	1.26743	0.878497
Ap3b1	-0.204991	0.697509	0.9489	0.878497
Gk	-0.205224	0.499019	1.07781	0.878497
Plcg1	-0.206494	0.562328	1.05293	0.878497
Samm50	-0.207047	0.713934	0.936939	0.878497
Mcat	-0.208	0.723394	0.931365	0.878497
Cpt2	-0.208281	0.530256	1.06951	0.878497
Acaa1a	-0.208672	0.566327	1.04967	0.878497
Cct5	-0.209661	0.663819	0.966072	0.878497
Cntn1	-0.210236	0.242409	1.23701	0.878497
Fuca1	-0.210487	0.319605	1.18199	0.878497
Immt	-0.21084	0.689091	0.948847	0.878497
Usp15	-0.211393	0.717576	0.935525	0.878497
Ubr4	-0.21293	0.721089	0.93396	0.878497
Tollip	-0.213299	0.287424	1.19701	0.878497
Spg7	-0.214169	0.706028	0.942692	0.878497
Ndufb4	-0.214617	0.616002	1.00746	0.878497
Mrpl10	-0.21722	0.566194	1.05024	0.878497
Fhl1	-0.217338	0.452334	1.10436	0.878497
Sec16a	-0.218297	0.726519	0.928851	0.878497
Rps9	-0.220855	0.729179	0.927266	0.878497
Dhx38	-0.221031	0.693003	0.950381	0.878497
Supv3l1	-0.222799	0.551296	1.05554	0.878497
Arpc1a	-0.223785	0.607478	1.01588	0.878497
Sdha	-0.224917	0.674434	0.958067	0.878497
Bud31	-0.2253	0.536402	1.06921	0.878497
Abcf2	-0.225598	0.728325	0.928165	0.878497
Cdsn	-0.225986	0.541581	1.06261	0.878497
Oat	-0.226038	0.729495	0.926182	0.878497
Kank2	-0.226413	0.710795	0.938518	0.878497
Prepl	-0.226516	0.603763	1.01826	0.878497
Cog4	-0.226717	0.668118	0.968181	0.878497
Zfp292	-0.227054	0.599876	1.01748	0.878497
Ssbp1	-0.227056	0.202513	1.25738	0.878497
Mccc1	-0.227824	0.403795	1.13234	0.878497
Tars2	-0.229583	0.729009	0.928042	0.878497
Ppid	-0.231324	0.705017	0.94559	0.878497
Mastl	-0.231597	0.701518	0.945697	0.878497
Atp6v1b2	-0.231789	0.460262	1.10444	0.878497
Ahcyl1	-0.232467	0.733111	0.924358	0.878497
Hmgb3	-0.232882	0.209184	1.26575	0.878497
Nemf	-0.235498	0.606153	1.01724	0.878497
Taf6l	-0.236636	0.734148	0.923705	0.878497
Suclg2	-0.236968	0.659645	0.972496	0.878497
Acot9	-0.237622	0.62148	1.00127	0.878497
Ppip5k2	-0.237984	0.735044	0.922393	0.878497
Bcas2	-0.238985	0.464737	1.10184	0.878497
Cbr4	-0.239007	0.73328	0.924081	0.878497
Mapk3	-0.239579	0.597659	1.01808	0.878497
Grb2	-0.239613	0.635525	0.987764	0.878497
H2afy2	-0.239836	0.592452	1.02165	0.878497
Ipo7	-0.240338	0.732268	0.924765	0.878497
Ptcd1	-0.241064	0.671425	0.964159	0.878497
Foxred1	-0.241501	0.71211	0.937651	0.878497
Bgn	-0.243934	0.262426	1.22603	0.878497
Krt31	-0.244512	0.693485	0.950494	0.878497
Snx27	-0.245023	0.680073	0.951303	0.878497
Rab9a	-0.245277	0.321034	1.1836	0.878497
Mrpl41	-0.246585	0.284697	1.21111	0.878497
Plaa	-0.246881	0.73969	0.91997	0.878497
Psmc5	-0.248433	0.613509	1.00964	0.878497
Smad2	-0.248568	0.721987	0.932077	0.878497
Ppp6r3	-0.248883	0.705123	0.945199	0.878497
Yars2	-0.24925	0.718718	0.934451	0.878497
Pan3	-0.250444	0.661863	0.969753	0.878497
Pus1	-0.250937	0.625926	0.995621	0.878497
Lamtor1	-0.251188	0.524021	1.07703	0.878497
Hist1h1b	-0.251274	0.289094	1.19768	0.878497
Shmt2	-0.251616	0.73922	0.920348	0.878497
Mta2	-0.251659	0.585769	1.02953	0.878497
Cct7	-0.251987	0.671379	0.965259	0.878497
Rps6ka5	-0.252305	0.398807	1.13986	0.878497
Herc2	-0.252378	0.645361	0.977496	0.878497
Ndufa2	-0.252422	0.718103	0.934674	0.878497
Tinf2	-0.253152	0.356432	1.16268	0.878497
Ppp1r8	-0.253205	0.737594	0.921702	0.878497
Mrpl4	-0.254004	0.644912	0.978062	0.878497
Cpne1	-0.254632	0.734294	0.923401	0.878497
Mrps18b	-0.255478	0.740563	0.918174	0.878497
Cyfip1	-0.256055	0.740382	0.918429	0.878497
Lactb2	-0.257202	0.617348	1.00483	0.878497
Mrps35	-0.257914	0.709804	0.939819	0.878497
Pdha1	-0.260663	0.737742	0.920918	0.878497
Kiaa0391	-0.261748	0.743845	0.916985	0.878497
Nt5dc2	-0.262303	0.739468	0.920175	0.878497
Nomo1	-0.262502	0.701006	0.946079	0.878497
Alad	-0.262691	0.324877	1.18128	0.878497
Ndufa9	-0.262972	0.743239	0.917665	0.878497
Esd	-0.263849	0.729058	0.927608	0.878497
Fasn	-0.264961	0.674339	0.959078	0.878497
Mat2b	-0.26887	0.535282	1.06966	0.878497
Pabpn1	-0.269316	0.66026	0.971596	0.878497
Ndufa10	-0.269339	0.689022	0.949301	0.878497
Aldoa	-0.26938	0.170083	1.24833	0.878497
Sae1	-0.271828	0.608906	1.01612	0.878497
Trnt1	-0.271829	0.603825	1.01764	0.878497
Slk	-0.272326	0.455774	1.10482	0.878497
Rps12	-0.272352	0.347639	1.17094	0.878497
Cpa4	-0.273288	0.372494	1.15638	0.878497
Nploc4	-0.27341	0.725656	0.930749	0.878497
Myh10	-0.274141	0.576442	1.03847	0.878497
Uba52	-0.27467	0.640934	0.981417	0.878497
Rab14	-0.274787	0.71185	0.937827	0.878497
Pot1b	-0.274981	0.701197	0.945801	0.878497
Slc25a24	-0.27504	0.329952	1.17812	0.878497
Mrpl46	-0.275177	0.744324	0.916151	0.878497
Ogdhl	-0.275295	0.534468	1.06984	0.878497
Cat	-0.275781	0.409526	1.11553	0.878497
Acad9	-0.276034	0.698296	0.948343	0.878497
Spryd4	-0.276537	0.747072	0.916213	0.878497
Hnrnpul1	-0.277832	0.440447	1.11305	0.878497
Faf2	-0.278149	0.748723	0.915405	0.878497
Fdxr	-0.278734	0.739969	0.919356	0.878497
Epha2	-0.278815	0.597224	1.01953	0.878497
Macf1	-0.280152	0.655245	0.975077	0.878497
Tsfm	-0.280294	0.643602	0.979198	0.878497
Tjp1	-0.281533	0.550031	1.05652	0.878497
Suclg1	-0.282242	0.741755	0.917739	0.878497
Eif5	-0.282779	0.375324	1.15164	0.878497
Tnpo1	-0.282995	0.733414	0.92376	0.878497
Gfpt2	-0.283852	0.486101	1.08744	0.878497
Psmc6	-0.284709	0.749538	0.914521	0.878497
Uba1	-0.284778	0.542568	1.06367	0.878497
Bsg	-0.286001	0.74949	0.914932	0.878497
Glud1	-0.287088	0.728773	0.92824	0.878497
Ighmbp2	-0.288301	0.65253	0.973473	0.878497
Ppib	-0.288906	0.719325	0.933709	0.878497
Cnn2	-0.289869	0.633403	0.989641	0.878497
Vbp1	-0.289947	0.494982	1.08386	0.878497
Hdlbp	-0.290088	0.74438	0.915745	0.878497
Eif3c	-0.290143	0.734573	0.922776	0.878497
Nfs1	-0.290776	0.747922	0.916311	0.878497
Copa	-0.291838	0.752288	0.911795	0.878497
Pnpt1	-0.291935	0.662365	0.968103	0.878497
Srpr	-0.29278	0.741281	0.918107	0.878497
Pabpc4	-0.292789	0.752082	0.912476	0.878497
Hat1	-0.293089	0.538865	1.06607	0.878497
Eef1a2	-0.293179	0.216811	1.26058	0.878497
Acot13	-0.293798	0.717838	0.93484	0.878497
Epb41l2	-0.294033	0.749987	0.9146	0.878497
Crip2	-0.295104	0.471626	1.09846	0.878497
Acsf3	-0.295218	0.751057	0.912628	0.878497
Cct8	-0.295452	0.72649	0.929313	0.878497
Nagk	-0.295608	0.374912	1.15335	0.878497
L2hgdh	-0.295766	0.750692	0.914053	0.878497
Eef1g	-0.297336	0.597849	1.01767	0.878497
Marcksl1	-0.298175	0.455161	1.10446	0.878497
Gda	-0.298201	0.652777	0.973231	0.878497
Mrpl44	-0.298422	0.75476	0.90785	0.878497
Ecsit	-0.299485	0.683501	0.951063	0.878497
Aars	-0.299501	0.546852	1.05811	0.878497
Tst	-0.299989	0.753465	0.910437	0.878497
Mrpl47	-0.300491	0.727062	0.929045	0.878497
Rplp0	-0.303049	0.491274	1.08674	0.878497
Cops3	-0.304185	0.679028	0.953204	0.878497
Ilf3	-0.304649	0.404953	1.12893	0.878497
Psmd14	-0.305044	0.75306	0.910873	0.878497
Nsdhl	-0.306164	0.369858	1.16185	0.878497
Umps	-0.30642	0.393993	1.14258	0.878497
Ier2	-0.307677	0.280066	1.21532	0.878497
Ncaph	-0.307739	0.737159	0.922127	0.878497
Adh5	-0.307778	0.748666	0.915806	0.878497
Gmps	-0.310765	0.755362	0.906739	0.878497
Eif3a	-0.311457	0.663652	0.96642	0.878497
Stk38	-0.313554	0.658314	0.973551	0.878497
Nudcd1	-0.313623	0.757429	0.905108	0.878497
Uck2	-0.315943	0.232668	1.25746	0.878497
Sarnp	-0.316144	0.42094	1.11718	0.878497
Timm44	-0.317849	0.753913	0.909592	0.878497
Bok	-0.317898	0.154155	1.28625	0.878497
Afg3l2	-0.318073	0.761198	0.901907	0.878497
Pfkl	-0.31822	0.42111	1.11514	0.878497
Psmc1	-0.318736	0.756065	0.906668	0.878497
Psma2	-0.318876	0.385394	1.14846	0.878497
Ahsa1	-0.31892	0.757123	0.905198	0.878497
Cyb5r3	-0.319502	0.70726	0.942221	0.878497
Stk4	-0.319676	0.123696	1.19573	0.878497
Ube3a	-0.324122	0.734394	0.923038	0.878497
Grsf1	-0.32474	0.753702	0.909798	0.878497
Ivd	-0.325972	0.757976	0.904399	0.878497
Wars	-0.326477	0.648493	0.975406	0.878497
Strn3	-0.32699	0.560999	1.05459	0.878497
Dars2	-0.327763	0.700895	0.947543	0.878497
Atp6v1a	-0.328252	0.662814	0.966977	0.878497
Ilf2	-0.328626	0.570801	1.04332	0.878497
Acad8	-0.329009	0.749201	0.915049	0.878497
Lsg1	-0.331166	0.547201	1.05792	0.878497
Ctnna1	-0.33154	0.406088	1.12288	0.878497
Dnaja1	-0.332391	0.755667	0.906648	0.878497
Impa2	-0.332997	0.396331	1.13825	0.878497
Me2	-0.334383	0.760072	0.902372	0.878497
Rad17	-0.334409	0.759422	0.903857	0.878497
Lars	-0.33445	0.642727	0.981004	0.878497
Mrpl1	-0.336498	0.685678	0.9502	0.878497
Icmt	-0.336805	0.764198	0.900526	0.878497
Hdac2	-0.337459	0.455935	1.10409	0.878497
Eif3b	-0.337484	0.767552	0.896923	0.878497
Hars	-0.337568	0.608851	1.01675	0.878497
Yme1l1	-0.337587	0.752603	0.911248	0.878497
Csk	-0.338221	0.67399	0.960304	0.878497
Ube2q1	-0.339191	0.769027	0.895566	0.878497
Ppp6c	-0.339978	0.685814	0.949834	0.878497
Nnt	-0.341166	0.52463	1.07735	0.878497
Sprr2b	-0.341607	0.411501	1.11834	0.878497
Uggt1	-0.341913	0.632604	0.990344	0.878497
Fscn1	-0.342111	0.754292	0.909127	0.878497
Ctnnb1	-0.342272	0.448272	1.1081	0.878497
Ddx47	-0.34334	0.679175	0.952848	0.878497
Pdxdc1	-0.344413	0.395407	1.14111	0.878497
Psmd3	-0.346116	0.644362	0.977851	0.878497
Nln	-0.346159	0.72185	0.932406	0.878497
Vwa8	-0.346372	0.764282	0.900179	0.878497
Ssr4	-0.346516	0.32881	1.18292	0.878497
Dbt	-0.347314	0.764827	0.899485	0.878497
Pdlim1	-0.348201	0.284435	1.21216	0.878497
Taok1	-0.351102	0.656147	0.974589	0.878497
Tacc3	-0.351341	0.693643	0.950164	0.878497
Adck4	-0.352054	0.767369	0.897591	0.878497
Ikbkb	-0.352067	0.765424	0.89841	0.878497
Pkn1	-0.35266	0.735809	0.922379	0.878497
Eif2b1	-0.353339	0.45984	1.10455	0.878497
Ncoa2	-0.353453	0.703193	0.944742	0.878497
Mthfd2	-0.353954	0.535171	1.07034	0.878497
Lyrm4	-0.354731	0.602834	1.01886	0.878497
Zw10	-0.355025	0.768703	0.896506	0.878497
Kiaa1524	-0.355243	0.608638	1.0171	0.878497
Rap1a	-0.355483	0.637217	0.986524	0.878497
Coro7	-0.356345	0.634343	0.988512	0.878497
Arhgef1	-0.356463	0.622285	0.999861	0.878497
Myh9	-0.357246	0.683508	0.950515	0.878497
Cltc	-0.360697	0.705215	0.944258	0.878497
Atl3	-0.361485	0.675771	0.9554	0.878497
Pcnt	-0.3618	0.61502	1.00933	0.878497
42258	-0.362545	0.649769	0.973017	0.878497
Pmpcb	-0.362822	0.775078	0.893858	0.878497
Dnajc8	-0.362907	0.302889	1.20245	0.878497
Lrpprc	-0.36322	0.639073	0.986188	0.878497
Psma4	-0.36382	0.642887	0.980619	0.878497
Itpa	-0.365398	0.479768	1.0949	0.878497
Lsm3	-0.366039	0.456176	1.10242	0.878497
Acaca	-0.367145	0.769214	0.894908	0.878497
Oxsr1	-0.367254	0.644187	0.97821	0.878497
Cpne3	-0.367533	0.761574	0.901455	0.878497
Ankrd28	-0.368439	0.610952	1.01314	0.878497
Appl1	-0.368849	0.312011	1.19286	0.878497
Atp2a2	-0.37015	0.754722	0.908264	0.878497
Slc3a2	-0.370878	0.767378	0.897161	0.878497
Pabpc1	-0.371438	0.763737	0.900877	0.878497
Myo1e	-0.372289	0.775577	0.892701	0.878497
Eif3i	-0.372503	0.446899	1.10932	0.878497
Lman2	-0.372787	0.548824	1.05676	0.878497
Sec23b	-0.372843	0.661871	0.969168	0.878497
Osgep	-0.372845	0.753265	0.910658	0.878497
Xpo1	-0.373569	0.686462	0.948522	0.878497
Msn	-0.374507	0.59864	1.01829	0.878497
Rps7	-0.375466	0.708799	0.941107	0.878497
Tgm1	-0.375748	0.46186	1.10271	0.878497
Lamb2	-0.375784	0.707493	0.942004	0.878497
Gnai2	-0.376169	0.754801	0.90744	0.878497
Mcm3	-0.376686	0.777163	0.892367	0.878497
Map2k4	-0.377158	0.547281	1.05722	0.878497
Stag1	-0.377606	0.39976	1.13712	0.878497
Ero1l	-0.37763	0.27503	1.22247	0.878497
Plec	-0.377782	0.57017	1.04619	0.878497
Galnt2	-0.378838	0.724386	0.930627	0.878497
Bcat2	-0.378889	0.578524	1.03672	0.878497
Hadha	-0.379348	0.726315	0.92959	0.878497
S100pbp	-0.379479	0.650709	0.971976	0.878497
Usp9x	-0.379567	0.772486	0.893904	0.878497
Gapdhs	-0.379724	0.372071	1.15658	0.878497
Plbd2	-0.380296	0.440708	1.11253	0.878497
Eif4a1	-0.380683	0.704766	0.945787	0.878497
Rbm12b1	-0.381809	0.572051	1.04161	0.878497
Prkra	-0.382127	0.672567	0.964054	0.878497
Acads	-0.382416	0.581332	1.03319	0.878497
Etfb	-0.383081	0.742669	0.917914	0.878497
Acsl1	-0.385141	0.649305	0.973548	0.878497
Hsph1	-0.385522	0.771654	0.894246	0.878497
D10Jhu81e	-0.386905	0.749129	0.91543	0.878497
Kdm1a	-0.38717	0.721312	0.933231	0.878497
Ltn1	-0.387234	0.645406	0.976942	0.878497
Msi1	-0.387558	0.590713	1.02459	0.878497
Paics	-0.38788	0.755035	0.906805	0.878497
Myo6	-0.38846	0.570248	1.04553	0.878497
Eif4a2	-0.388835	0.780422	0.889666	0.878497
Mthfd1	-0.388858	0.726137	0.930363	0.878497
Idh3g	-0.390142	0.732149	0.925107	0.878497
Timm8b	-0.39092	0.415585	1.12048	0.878497
Mrpl39	-0.391202	0.75063	0.914445	0.878497
Tax1bp1	-0.391813	0.57358	1.03882	0.878497
Uqcrc2	-0.392806	0.774188	0.893698	0.878497
Psmd11	-0.393121	0.762776	0.901531	0.878497
Gale	-0.393286	0.776588	0.892569	0.878497
Psma7	-0.393514	0.491258	1.08772	0.878497
Psma3	-0.393892	0.525446	1.07716	0.878497
Cyc1	-0.397135	0.67889	0.953574	0.878497
Psmd2	-0.397257	0.784331	0.888162	0.878497
Pdk1	-0.398713	0.75303	0.9113	0.878497
Ncapg	-0.398941	0.469449	1.09661	0.878497
Nccrp1	-0.399546	0.425249	1.11493	0.878497
Smurf2	-0.400711	0.56382	1.0524	0.878497
Ttk	-0.400739	0.634603	0.987621	0.878497
Mthfd1l	-0.400808	0.63097	0.991703	0.878497
Rhot1	-0.401828	0.736966	0.922856	0.878497
Hspa4l	-0.402242	0.313265	1.18811	0.878497
Kif13b	-0.40357	0.604452	1.01798	0.878497
Mrps9	-0.403763	0.723859	0.930452	0.878497
Rps6ka1	-0.40587	0.744097	0.916346	0.878497
Upf3b	-0.406712	0.417191	1.11595	0.878497
Slc25a3	-0.406725	0.711641	0.938072	0.878497
Gfm1	-0.407742	0.633533	0.989193	0.878497
Etfa	-0.408538	0.689629	0.949038	0.878497
Ppp1r12a	-0.408934	0.754562	0.90853	0.878497
Sec31a	-0.410669	0.641787	0.980828	0.878497
Idh3b	-0.410865	0.787945	0.886765	0.878497
Pbrm1	-0.411179	0.504064	1.07407	0.878497
Stub1	-0.411378	0.686833	0.947933	0.878497
Serpinb2	-0.411555	0.71859	0.934797	0.878497
Hspa4	-0.413008	0.750017	0.914167	0.878497
Vps35	-0.413535	0.679389	0.952025	0.878497
Sub1	-0.414491	0.362254	1.16254	0.878497
Acaa2	-0.41454	0.789734	0.885843	0.878497
Krt82	-0.414605	0.38917	1.14112	0.878497
Mms19	-0.414766	0.789482	0.885979	0.878497
Morc1	-0.415251	0.787308	0.887308	0.878497
Amt	-0.416038	0.717741	0.935227	0.878497
Pitrm1	-0.416111	0.787445	0.887042	0.878497
Ajuba	-0.416847	0.660946	0.970802	0.878497
Srprb	-0.417196	0.721405	0.932845	0.878497
Gga2	-0.417618	0.655355	0.974021	0.878497
Clpx	-0.417623	0.646847	0.977257	0.878497
Hspa1a	-0.417857	0.418323	1.11397	0.878497
Hyou1	-0.41806	0.689795	0.948718	0.878497
Ik	-0.418411	0.621634	1.00017	0.878497
Rtn4	-0.418831	0.616742	1.00522	0.878497
Impdh1	-0.420227	0.695343	0.950302	0.878497
Arpc2	-0.422478	0.616265	1.00651	0.878497
Psat1	-0.422521	0.677543	0.955066	0.878497
Pafah1b1	-0.424041	0.565839	1.05122	0.878497
Ybx1	-0.424329	0.390376	1.14044	0.878497
Hspa9	-0.425363	0.786514	0.886833	0.878497
Cad	-0.425782	0.623226	1.00002	0.878497
Rpsa	-0.42595	0.65418	0.974712	0.878497
Gpd2	-0.428205	0.782146	0.889925	0.878497
Eif2s2	-0.42957	0.538131	1.06551	0.878497
Des	-0.42958	0.261182	1.22745	0.878497
Itgb1	-0.429677	0.548141	1.05716	0.878497
Abcd1	-0.432074	0.740164	0.918637	0.878497
Sf3a3	-0.432434	0.594146	1.01939	0.878497
Serpinh1	-0.432561	0.540126	1.06326	0.878497
Myg1	-0.433768	0.470889	1.09782	0.878497
Acly	-0.433982	0.792132	0.885608	0.878497
Ptcd2	-0.434144	0.746889	0.916461	0.878497
Por	-0.435119	0.785711	0.886768	0.878497
Myo1d	-0.435156	0.434317	1.10935	0.878497
Idh3a	-0.435156	0.792782	0.885503	0.878497
Hsd17b4	-0.436666	0.525246	1.07768	0.878497
Noa1	-0.437035	0.714771	0.935972	0.878497
Kidins220	-0.438197	0.452201	1.10517	0.878497
Nutf2	-0.439538	0.412601	1.1175	0.878497
Rars2	-0.440332	0.719051	0.933863	0.878497
Yars	-0.440741	0.402452	1.13527	0.878497
Srp72	-0.441031	0.757015	0.905524	0.878497
Lss	-0.441714	0.483292	1.0935	0.878497
Lap3	-0.441891	0.713382	0.937249	0.878497
Sgpl1	-0.443141	0.79631	0.885285	0.878497
Rps27	-0.443877	0.759435	0.903419	0.878497
Nudcd2	-0.444315	0.73164	0.925447	0.878497
Ppox	-0.444394	0.756471	0.905329	0.878497
Prdx2	-0.444434	0.639446	0.985485	0.878497
Psmd4	-0.444769	0.662534	0.967161	0.878497
Flna	-0.445052	0.586112	1.02937	0.878497
Abce1	-0.4459	0.698266	0.948844	0.878497
Mrpl48	-0.446042	0.773525	0.893367	0.878497
Actr1b	-0.446917	0.354594	1.16146	0.878497
Flnb	-0.447752	0.727602	0.929237	0.878497
Cep97	-0.447956	0.587347	1.02926	0.878497
Tbc1d15	-0.448505	0.762383	0.901515	0.878497
Aldh4a1	-0.449012	0.750962	0.912979	0.878497
Sec63	-0.449103	0.673108	0.962507	0.878497
Rps15	-0.4493	0.576889	1.03849	0.878497
Tufm	-0.449384	0.772411	0.894252	0.878497
Trap1	-0.450424	0.677416	0.955454	0.878497
Tma7	-0.451788	0.252872	1.23223	0.878497
Gmppa	-0.452117	0.717397	0.936317	0.878497
Prr12	-0.453391	0.515693	1.07572	0.878497
Cct4	-0.453487	0.683811	0.950382	0.878497
Iars2	-0.454908	0.728304	0.928637	0.878497
Rab10	-0.455248	0.791171	0.885367	0.878497
Atpaf2	-0.456269	0.799387	0.882928	0.878497
Ipo5	-0.456273	0.79345	0.885002	0.878497
Dhtkd1	-0.456288	0.610503	1.01523	0.878497
Lrrc47	-0.456375	0.596795	1.01952	0.878497
Hspbp1	-0.456979	0.627329	0.996519	0.878497
Prdx4	-0.45885	0.497545	1.08051	0.878497
Rapgef6	-0.459187	0.463087	1.10122	0.878497
Pfkm	-0.459582	0.491774	1.08684	0.878497
Pdhb	-0.460024	0.742375	0.918028	0.878497
Uqcrc1	-0.460133	0.799117	0.88386	0.878497
Map4	-0.460566	0.275641	1.21835	0.878497
Vps53	-0.461195	0.527017	1.07207	0.878497
AU019823	-0.462416	0.449058	1.10544	0.878497
Anxa11	-0.462873	0.770641	0.89438	0.878497
Hist1h2bb	-0.462965	0.46523	1.10081	0.878497
Csnk2b	-0.465568	0.483731	1.09345	0.878497
Trove2	-0.466467	0.451206	1.10844	0.878497
Smarca4	-0.46671	0.707815	0.941905	0.878497
Slc44a2	-0.467254	0.622383	0.999343	0.878497
Bcap31	-0.467635	0.327963	1.18525	0.878497
Pfkp	-0.467883	0.7142	0.936256	0.878497
Gls	-0.468514	0.80246	0.879783	0.878497
Naa50	-0.469077	0.713575	0.936985	0.878497
Vps29	-0.469542	0.18202	1.26194	0.878497
Sms	-0.469562	0.801348	0.881816	0.878497
Irs1	-0.469659	0.630847	0.992822	0.878497
Tmed2	-0.470042	0.461213	1.10228	0.878497
Nucks1	-0.470232	0.471826	1.09464	0.878497
Mto1	-0.470239	0.80191	0.881212	0.878497
Acadvl	-0.470612	0.80244	0.880167	0.878497
Larp1	-0.470931	0.672355	0.96433	0.878497
Hal	-0.471884	0.563081	1.05185	0.878497
Slc25a5	-0.473121	0.711526	0.938441	0.878497
Hgs	-0.473696	0.510679	1.07469	0.878497
Pck2	-0.474536	0.756075	0.906223	0.878497
Baz1a	-0.474573	0.662279	0.968573	0.878497
Krt8	-0.475324	0.342505	1.17022	0.878497
Sec24b	-0.477491	0.790731	0.885708	0.878497
Pdlim5	-0.477795	0.769957	0.895334	0.878497
Akr1b7	-0.478163	0.546182	1.05853	0.878497
Gnl1	-0.478612	0.775177	0.893539	0.878497
Alg11	-0.478845	0.797528	0.883336	0.878497
Myl12b	-0.479666	0.395466	1.1399	0.878497
Apex1	-0.480503	0.520959	1.07538	0.878497
Agps	-0.480879	0.768884	0.895839	0.878497
Stat3	-0.481396	0.759564	0.903122	0.878497
Cit	-0.483111	0.796653	0.885253	0.878497
Akr1c21	-0.483574	0.375046	1.15227	0.878497
Sptbn2	-0.485143	0.504468	1.07301	0.878497
Uba1y	-0.485483	0.737006	0.922421	0.878497
Tubb4a	-0.485584	0.78506	0.887718	0.878497
Grpel1	-0.486054	0.489347	1.08652	0.878497
Atp5a1	-0.486253	0.780881	0.889763	0.878497
Ina	-0.486529	0.362998	1.16336	0.878497
Gatad2b	-0.487403	0.577774	1.03772	0.878497
Cse1l	-0.487973	0.802518	0.879441	0.878497
Diaph1	-0.488875	0.784291	0.888539	0.878497
Arf1	-0.489537	0.465275	1.09982	0.878497
Txlna	-0.490359	0.398902	1.13876	0.878497
Idh2	-0.492459	0.765435	0.897979	0.878497
Copb2	-0.493024	0.583674	1.03272	0.878497
Eral1	-0.494056	0.73735	0.921882	0.878497
Ctsk	-0.494437	0.372693	1.1555	0.878497
Mapk8	-0.495751	0.768832	0.896217	0.878497
Atpaf1	-0.496371	0.730838	0.926898	0.878497
Hmgb1	-0.49648	0.442538	1.11243	0.878497
Hspa14	-0.496943	0.687279	0.947999	0.878497
Rps14	-0.496959	0.699565	0.948441	0.878497
Cttnbp2nl	-0.497522	0.731642	0.924957	0.878497
Depdc5	-0.497699	0.402071	1.13824	0.878497
Ubap2l	-0.498381	0.683292	0.951885	0.878497
Naa15	-0.498655	0.528646	1.07263	0.878497
G3bp1	-0.498727	0.597252	1.01884	0.878497
Lsm14a	-0.498825	0.453295	1.10558	0.878497
Eif5a	-0.500467	0.808673	0.879298	0.878497
Tomm70a	-0.502665	0.697192	0.949011	0.878497
Acsf2	-0.503717	0.792575	0.885687	0.878497
Srek1ip1	-0.504447	0.51656	1.07658	0.878497
Psmc3	-0.504564	0.803918	0.87895	0.878497
Capza1	-0.504623	0.551023	1.05587	0.878497
Sucla2	-0.504796	0.709539	0.940515	0.878497
Nmral1	-0.505767	0.675139	0.956213	0.878497
Errfi1	-0.50592	0.788307	0.885914	0.878497
Atp5c1	-0.506099	0.797036	0.884851	0.878497
Ctps1	-0.50689	0.811504	0.879561	0.878497
Qdpr	-0.508081	0.669856	0.966576	0.878497
Specc1l	-0.508397	0.559632	1.05619	0.878497
Kiaa1522	-0.509336	0.247452	1.23622	0.878497
Aars2	-0.50955	0.735132	0.922016	0.878497
Rangap1	-0.510169	0.74723	0.915934	0.878497
Cdk17	-0.51256	0.746834	0.916867	0.878497
Eif4g2	-0.513264	0.813256	0.879456	0.878497
Mut	-0.513569	0.778142	0.8922	0.878497
Psmd7	-0.513744	0.641813	0.980239	0.878497
Map2k3	-0.513804	0.44449	1.11029	0.878497
Uap1	-0.515006	0.738694	0.92114	0.878497
Zdhhc13	-0.515043	0.811489	0.879946	0.878497
Mrps31	-0.515091	0.759659	0.902783	0.878497
Nfat5	-0.516375	0.295123	1.18548	0.878497
Actb	-0.516635	0.766514	0.897917	0.878497
Birc6	-0.517743	0.765807	0.897973	0.878497
Tbrg4	-0.51794	0.77653	0.892935	0.878497
Phb2	-0.520047	0.658616	0.973393	0.878497
Zc3h18	-0.520943	0.417984	1.11556	0.878497
Aldh6a1	-0.521961	0.793569	0.884305	0.878497
Rab23	-0.522277	0.797503	0.88372	0.878497
Fyttd1	-0.522278	0.703126	0.945185	0.878497
Pgam1	-0.522306	0.275246	1.22115	0.878497
Clpp	-0.522998	0.712429	0.937551	0.878497
Rab32	-0.524017	0.533748	1.0711	0.878497
Arhgap10	-0.524023	0.492117	1.08659	0.878497
Hadhb	-0.52406	0.787987	0.886392	0.878497
Sod2	-0.524629	0.666082	0.967589	0.878497
Psma5	-0.525327	0.582919	1.03215	0.878497
Hsd17b10	-0.525468	0.813476	0.878894	0.878497
Mprip	-0.525739	0.400196	1.137	0.878497
Rpl22	-0.526558	0.620532	1.00246	0.878497
Chuk	-0.526809	0.726076	0.930786	0.878497
Arhgef2	-0.527734	0.772835	0.893872	0.878497
Vcp	-0.527751	0.388177	1.13961	0.878497
Tdh	-0.530385	0.772171	0.894409	0.878497
Atxn2l	-0.532983	0.736956	0.92333	0.878497
Hprt1	-0.533285	0.26213	1.22706	0.878497
Dlat	-0.534781	0.759133	0.904419	0.878497
Arpc4	-0.535558	0.684665	0.950457	0.878497
Huwe1	-0.53729	0.817077	0.879189	0.878858
Eef2	-0.537445	0.427066	1.11723	0.878497
Gpd1l	-0.537855	0.811321	0.880165	0.878497
Ak2	-0.538554	0.350377	1.16206	0.878497
Copb1	-0.539388	0.631138	0.990658	0.878497
Impdh2	-0.540012	0.81514	0.879095	0.878858
Picalm	-0.540052	0.775646	0.892349	0.878497
Ankmy2	-0.541261	0.750763	0.913671	0.878497
Ankrd17	-0.542326	0.812844	0.87941	0.878497
Rab8a	-0.542456	0.791313	0.885109	0.878497
Ppif	-0.546437	0.645003	0.977576	0.878497
Gfm2	-0.546552	0.661287	0.970704	0.878497
Sdhb	-0.547059	0.74393	0.916614	0.878497
Lonp1	-0.54728	0.754383	0.908775	0.878497
Psma1	-0.547594	0.499738	1.0774	0.878497
Rps6ka3	-0.548761	0.17731	1.25864	0.878497
Eif3f	-0.549078	0.804703	0.879001	0.878497
Arhgdib	-0.550659	0.341131	1.17058	0.878497
Psme2	-0.551583	0.444057	1.11037	0.878497
Ran	-0.551607	0.782266	0.889636	0.878497
Psmb3	-0.551619	0.783224	0.889025	0.878497
Rpl35a	-0.552056	0.514074	1.07612	0.878497
Itgb2	-0.552409	0.498876	1.07848	0.878497
Nasp	-0.553357	0.716709	0.936962	0.878497
Kdm2b	-0.553659	0.545189	1.06006	0.878497
Kpna4	-0.553827	0.669017	0.967714	0.878497
Fdps	-0.554085	0.480892	1.09536	0.878497
Glo1	-0.555429	0.350206	1.16311	0.878497
Glg1	-0.555481	0.619826	1.00268	0.878497
Rab18	-0.555977	0.792822	0.885132	0.878497
Lypla1	-0.556409	0.465226	1.1019	0.878497
Atxn10	-0.556647	0.783928	0.888975	0.878497
Rab11fip5	-0.557093	0.311236	1.19954	0.878497
Crkl	-0.557678	0.607358	1.0164	0.878497
Tars	-0.559385	0.625055	0.996902	0.878497
Ywhag	-0.559721	0.659345	0.973261	0.878497
Naca	-0.560026	0.58017	1.03499	0.878497
Stip1	-0.560387	0.417061	1.11686	0.878497
Ptcd3	-0.560487	0.764631	0.8997	0.878497
Myo19	-0.560965	0.726142	0.929868	0.878497
Tmem63b	-0.561644	0.603164	1.0187	0.878497
Rad23a	-0.562131	0.460563	1.10294	0.878497
Ywhaq	-0.562459	0.602459	1.01968	0.878497
Hnrnph3	-0.56416	0.557087	1.05474	0.878497
Rps18	-0.564785	0.665199	0.966896	0.878497
Sec23a	-0.565039	0.780017	0.88963	0.878497
Gspt1	-0.56531	0.824209	0.881281	0.880863
Nras	-0.566952	0.790484	0.885849	0.878497
Psmb2	-0.567169	0.465436	1.09911	0.878497
Cpsf7	-0.567253	0.290954	1.19291	0.878497
Ttc27	-0.568172	0.824255	0.880934	0.880863
Psmc2	-0.568567	0.772978	0.893603	0.878497
Nedd4l	-0.568596	0.731259	0.92595	0.878497
Mre11a	-0.569321	0.693844	0.949892	0.878497
Tsg101	-0.570149	0.743366	0.917345	0.878497
Acadm	-0.570817	0.757458	0.904688	0.878497
Tlk2	-0.573531	0.695975	0.95062	0.878497
Clic1	-0.573697	0.239412	1.24851	0.878497
Unc13d	-0.576316	0.672012	0.964421	0.878497
Gys1	-0.576698	0.510047	1.07621	0.878497
Txndc12	-0.577046	0.428242	1.11908	0.878497
Rpl27	-0.577211	0.429394	1.11718	0.878497
Sh3bgrl3	-0.577861	0.562571	1.05172	0.878497
Eno1	-0.57941	0.485016	1.08911	0.878497
Fastkd2	-0.579602	0.814216	0.878497	0.878497
Eif4g3	-0.580551	0.53342	1.07134	0.878497
Rbm47	-0.581255	0.801936	0.880833	0.878497
Anxa4	-0.581736	0.564982	1.05127	0.878497
Ndufs1	-0.582172	0.781203	0.889278	0.878497
Ahcy	-0.582711	0.729439	0.927101	0.878497
Glrx3	-0.583787	0.803911	0.879347	0.878497
Ube3c	-0.584524	0.670598	0.966473	0.878497
Skp1	-0.585908	0.572059	1.04082	0.878497
Mat2a	-0.586318	0.814139	0.878812	0.878497
Eppk1	-0.586721	0.759921	0.902643	0.878497
Ube2m	-0.586854	0.490082	1.08714	0.878497
Afap1	-0.587453	0.621058	1.00195	0.878497
Cisd2	-0.587461	0.103435	1.19984	0.878497
Atic	-0.587478	0.717305	0.937226	0.878497
Sf3b4	-0.58762	0.494754	1.08436	0.878497
Ermp1	-0.587834	0.570326	1.04487	0.878497
Klc1	-0.587898	0.517067	1.0767	0.878497
Psmd13	-0.588636	0.794014	0.884387	0.878497
Ppfia1	-0.588938	0.696646	0.949355	0.878497
Tcf20	-0.590945	0.387713	1.14248	0.878497
Itga6	-0.590983	0.816212	0.879055	0.878858
Mdh2	-0.591885	0.617986	1.00449	0.878497
Cfl1	-0.593675	0.332643	1.17189	0.878497
Ppp2r1a	-0.594016	0.659474	0.972847	0.878497
Rtn3	-0.594127	0.637158	0.987076	0.878497
Acox1	-0.595064	0.401813	1.13887	0.878497
Mlec	-0.595549	0.545565	1.05993	0.878497
Mios	-0.595922	0.517783	1.07536	0.878497
Iqgap1	-0.596331	0.813444	0.879259	0.878497
Dek	-0.596539	0.60616	1.01654	0.878497
Dync1li1	-0.597045	0.696499	0.950789	0.878497
Phgdh	-0.597242	0.591292	1.02336	0.878497
Ap3m1	-0.597287	0.827356	0.882662	0.882366
Thop1	-0.597557	0.770211	0.895192	0.878497
Dync1h1	-0.597847	0.81937	0.879667	0.879453
Plekha5	-0.598651	0.811077	0.881106	0.878497
Srp54	-0.599022	0.797256	0.88427	0.878497
Pdpr	-0.599444	0.824558	0.880863	0.880863
Trappc5	-0.601308	0.545063	1.06156	0.878497
Pgrmc2	-0.602153	0.467606	1.09661	0.878497
Rab1A	-0.602253	0.808087	0.879867	0.878497
Ccdc6	-0.602563	0.643496	0.979663	0.878497
Hsp90ab1	-0.602607	0.779642	0.890485	0.878497
Ralbp1	-0.602919	0.284042	1.21484	0.878497
Psme3	-0.603636	0.421331	1.11325	0.878497
Dnajb11	-0.604056	0.705661	0.943792	0.878497
Usp34	-0.604666	0.706275	0.942492	0.878497
Anp32e	-0.604918	0.830373	0.883898	0.883898
Ppp2ca	-0.605034	0.658877	0.973174	0.878497
Add1	-0.605488	0.526782	1.07435	0.878497
Psmc4	-0.605512	0.762837	0.900709	0.878497
Arcn1	-0.605702	0.78273	0.888888	0.878497
Mtmr4	-0.605767	0.656686	0.973566	0.878497
Pkp1	-0.60615	0.605607	1.01776	0.878497
Gyg1	-0.606215	0.547339	1.05647	0.878497
Clic4	-0.606233	0.578906	1.03507	0.878497
Nckap1	-0.60681	0.7386	0.921507	0.878497
Foxk1	-0.608039	0.631004	0.991102	0.878497
Casd1	-0.609601	0.257753	1.22588	0.878497
Rab5a	-0.609665	0.650436	0.972791	0.878497
Prkaca	-0.609757	0.801392	0.881457	0.878497
Hp	-0.611086	0.329556	1.18025	0.878497
Ecm29	-0.611099	0.811088	0.880716	0.878497
Ckap4	-0.611163	0.660443	0.971264	0.878497
Atp5d	-0.612161	0.611377	1.01173	0.878497
Spata5	-0.613268	0.818135	0.879532	0.879453
Gipc1	-0.614101	0.588218	1.0255	0.878497
Nfatc3	-0.614635	0.620535	1.00179	0.878497
Uso1	-0.615449	0.500768	1.0767	0.878497
Actr3	-0.615777	0.487915	1.08741	0.878497
Usp5	-0.615965	0.811972	0.879667	0.878497
Mtch1	-0.616536	0.543025	1.06369	0.878497
Rps8	-0.616765	0.694901	0.950244	0.878497
Cdc42	-0.616894	0.686744	0.948361	0.878497
Spcs3	-0.61696	0.754161	0.90943	0.878497
Aprt	-0.617267	0.808121	0.879502	0.878497
Arpc1b	-0.61768	0.820475	0.879662	0.879453
Gcdh	-0.617695	0.828885	0.883105	0.883105
Utrn	-0.619257	0.472463	1.09398	0.878497
Snx5	-0.619943	0.790282	0.88604	0.878497
Alg5	-0.620849	0.751365	0.912536	0.878497
Serpinc1	-0.621305	0.563961	1.05184	0.878497
Hsdl2	-0.621479	0.518461	1.07489	0.878497
Fkbp1a	-0.622037	0.668086	0.968724	0.878497
Ganab	-0.622567	0.73465	0.922385	0.878497
Rps10	-0.623569	0.530734	1.06956	0.878497
Plch1	-0.624203	0.748226	0.916211	0.878497
Ogdh	-0.624266	0.739763	0.919579	0.878497
Rac1	-0.625302	0.382966	1.14841	0.878497
42254	-0.625718	0.784627	0.888074	0.878497
Hspa5	-0.626119	0.770342	0.894906	0.878497
Pdia6	-0.626563	0.486364	1.08701	0.878497
Capn1	-0.627104	0.635365	0.988161	0.878497
Tomm20	-0.627583	0.324542	1.18187	0.878497
Pdap1	-0.627776	0.678063	0.953539	0.878497
Uba6	-0.627953	0.768609	0.896836	0.878497
Ndufv1	-0.628295	0.677696	0.954716	0.878497
Srp14	-0.628568	0.405034	1.12784	0.878497
Wdr1	-0.630014	0.731006	0.926617	0.878497
Vps4b	-0.630669	0.28786	1.19465	0.878497
Kif15	-0.630867	0.802969	0.879125	0.878497
Dnajc5	-0.631089	0.640699	0.982322	0.878497
Taco1	-0.631361	0.834682	0.886897	0.886647
Ptrf	-0.632195	0.613171	1.01048	0.878497
Rock1	-0.632282	0.571347	1.04272	0.878497
Sec22b	-0.6333	0.720059	0.934152	0.878497
Sptbn1	-0.634306	0.505337	1.07294	0.878497
Ide	-0.63641	0.471746	1.09552	0.878497
Rps3a	-0.636615	0.708618	0.941919	0.878497
Gsk3a	-0.636978	0.706686	0.942513	0.878497
Cdc40	-0.637102	0.740086	0.919021	0.878497
Ufd1l	-0.637776	0.67333	0.961669	0.878497
Akr7a2	-0.637906	0.313813	1.1864	0.878497
Sf3a2	-0.638647	0.550574	1.05671	0.878497
Ptges3	-0.638932	0.82092	0.879743	0.879453
Ppa1	-0.639527	0.42146	1.11236	0.878497
Pou2f1	-0.639582	0.669381	0.967652	0.878497
Palld	-0.639633	0.81706	0.879569	0.878858
Vcl	-0.640137	0.53927	1.06599	0.878497
Ywhae	-0.640218	0.590522	1.02576	0.878497
Znf609	-0.640624	0.481354	1.09537	0.878497
Prkab2	-0.641806	0.431288	1.11237	0.878497
Bcar3	-0.642239	0.838698	0.88799	0.88799
Rab11fip1	-0.645648	0.191591	1.26206	0.878497
Sos1	-0.646335	0.60509	1.01833	0.878497
Cdc42bpb	-0.648451	0.438687	1.11215	0.878497
Psmb4	-0.648907	0.52685	1.07356	0.878497
Cops5	-0.649663	0.353086	1.15972	0.878497
Aip	-0.652094	0.612515	1.0115	0.878497
Ppp6r2	-0.652663	0.640239	0.986067	0.878497
Letm1	-0.652715	0.700951	0.947081	0.878497
Pfkfb3	-0.653768	0.275631	1.22058	0.878497
Trp53i11	-0.654456	0.587577	1.02815	0.878497
Cnbp	-0.656931	0.767592	0.896529	0.878497
Akr1b1	-0.658553	0.825687	0.881277	0.881277
Aida	-0.658904	0.732705	0.924826	0.878497
Hmga1	-0.659189	0.729822	0.926103	0.878497
Dip2b	-0.659837	0.371997	1.1609	0.878497
Tpi1	-0.659877	0.648957	0.973641	0.878497
Ankrd13c	-0.660056	0.750847	0.913307	0.878497
Pdhx	-0.661306	0.765268	0.898671	0.878497
Eef1a1	-0.661728	0.841729	0.888824	0.888824
Ckb	-0.662386	0.474637	1.09052	0.878497
Aff4	-0.6639	0.249066	1.23391	0.878497
Trim47	-0.664138	0.568028	1.04873	0.878497
Cttn	-0.668006	0.579119	1.03389	0.878497
Kcnab2	-0.668736	0.616349	1.00596	0.878497
Ap1g1	-0.669326	0.762782	0.90109	0.878497
Hsp90b1	-0.669931	0.819733	0.87966	0.879453
Gpi	-0.671295	0.496461	1.08013	0.878497
Esyt2	-0.671371	0.466257	1.09887	0.878497
Osbp	-0.671583	0.583923	1.03086	0.878497
Pak2	-0.672897	0.839671	0.888624	0.888624
Actr2	-0.673379	0.59172	1.02261	0.878497
Rab2a	-0.676088	0.712572	0.937221	0.878497
Usp1	-0.676398	0.733997	0.924004	0.878497
Fam126b	-0.676543	0.458788	1.10313	0.878497
Uckl1	-0.676584	0.403249	1.13482	0.878497
Mapkapk5	-0.677568	0.763835	0.900546	0.878497
Med13l	-0.677968	0.701611	0.945286	0.878497
Mapkapk2	-0.678033	0.777539	0.892369	0.878497
Timm9	-0.678771	0.388038	1.14061	0.878497
Ddost	-0.679466	0.758935	0.904636	0.878497
Tex2	-0.680833	0.812804	0.879767	0.878497
Hist1h4a	-0.681753	0.544019	1.06126	0.878497
Cep350	-0.683681	0.779982	0.890018	0.878497
Anp32a	-0.687855	0.669684	0.967503	0.878497
Csnk2a2	-0.688852	0.699148	0.948417	0.878497
Ano5	-0.68916	0.842306	0.889038	0.889038
Mst4	-0.689425	0.821774	0.879468	0.879468
Cyp51a1	-0.690391	0.841493	0.888969	0.888824
Tuba3a	-0.690612	0.847921	0.891799	0.891799
Fen1	-0.690663	0.754821	0.907006	0.878497
Naa10	-0.690951	0.752329	0.911379	0.878497
Canx	-0.691123	0.601762	1.01922	0.878497
Hspa8	-0.691218	0.783938	0.888563	0.878497
Pcnxl3	-0.691976	0.671017	0.965908	0.878497
Mal2	-0.692054	0.784953	0.88802	0.878497
Mob1a	-0.693323	0.625238	0.996525	0.878497
Ufl1	-0.69333	0.835566	0.886647	0.886647
Bckdha	-0.693959	0.786233	0.886937	0.878497
Cops4	-0.695458	0.633225	0.990012	0.878497
Fam50a	-0.695785	0.647195	0.977162	0.878497
Raf1	-0.69742	0.82535	0.881312	0.881277
Aco2	-0.697969	0.846302	0.891278	0.891278
Pdcd5	-0.698987	0.328591	1.18392	0.878497
Lasp1	-0.699244	0.766749	0.89775	0.878497
Glod4	-0.700794	0.562112	1.05418	0.878497
Ckm	-0.702212	0.815443	0.879022	0.878858
Grhpr	-0.702381	0.482527	1.09594	0.878497
Ncbp2	-0.702566	0.67537	0.955971	0.878497
Mb21d2	-0.70314	0.433361	1.11289	0.878497
Prkd3	-0.703451	0.788936	0.886202	0.878497
Tecr	-0.70363	0.437455	1.11378	0.878497
Ptpn12	-0.703991	0.845995	0.89135	0.891278
Sh3glb1	-0.705468	0.737727	0.921384	0.878497
Sptan1	-0.70568	0.683486	0.951598	0.878497
Gfpt1	-0.705946	0.241249	1.25534	0.878497
Sfxn1	-0.705991	0.589411	1.02608	0.878497
Krt36	-0.706647	0.798269	0.883745	0.878497
Mgea5	-0.707188	0.543031	1.06282	0.878497
Gdi1	-0.708274	0.351667	1.16148	0.878497
Hspd1	-0.708311	0.799139	0.883474	0.878497
Acbd3	-0.708988	0.65796	0.97424	0.878497
Pfn2	-0.710185	0.636506	0.987353	0.878497
Apc	-0.710883	0.808278	0.87927	0.878497
Eef1b	-0.711106	0.3117	1.19552	0.878497
Bet1	-0.711664	0.496068	1.08225	0.878497
[truncated: 379 more rows]
