# Supplementary material for: iDRiP for the systematic discovery of proteins bound directly to noncoding RNA
Source: Springer Nature journal article supplement (doi:10.1038/s41596-021-00555-9), 2021-06-09
Supplement: MOESM9 [file 41596_2021_555_MOESM9_ESM22.xlsx]

## Sheet: U1-ChIRP-MS by RankProd
gene	log2Ratio	pvalue	pfp	FDR
Smn1	6.26471	2.51823e-06	0.00362248	0.00241498
Nudt16l1	7.13469	9.54933e-07	0.00274734	0.00241498
Fam98b	7.16123	2.51823e-06	0.00241498	0.00241498
Safb	5.91974	8.97228e-06	0.00645331	0.00619587
Pou5f1	6.27468	1.11993e-05	0.0064441	0.00619587
Ncoa3	6.17146	1.29215e-05	0.00619587	0.00619587
Sfswap	6.04268	1.58768e-05	0.00652536	0.00636361
>sp|Q9CQE8|CN166_MOUSE	5.96255	1.76951e-05	0.00636361	0.00636361
Hnrnpa0	5.58957	2.52504e-05	0.0080717	0.0080717
Fanci	5.44128	5.41588e-05	0.0155815	0.0155815
Coil	5.27648	7.63798e-05	0.0199768	0.0199768
Ptbp1	5.1031	0.000114561	0.0274661	0.0274661
Ylpm1	4.90917	0.000183001	0.0404996	0.0376068
Esrrb	4.81054	0.000183001	0.0376068	0.0376068
Raly	4.62888	0.000263649	0.0446187	0.0446187
Gemin4	4.77867	0.000250411	0.0480288	0.0446187
Enox1	4.67058	0.000255696	0.0459774	0.0446187
Upp1	4.50039	0.000358358	0.0572776	0.0572776
Zcchc10	4.51595	0.000413864	0.0595344	0.0586194
Nudcd1	4.38256	0.000427879	0.0586194	0.0586194
Bex4	4.4006	0.000398975	0.0604132	0.0586194
Rbmxl2	4.36251	0.000524482	0.0685879	0.0684078
Phf3	4.33071	0.000562934	0.0704157	0.0684078
Cbll1	4.2473	0.00057066	0.0684078	0.0684078
Gemin7	4.38053	0.000598761	0.0689054	0.0689054
Arglu1	4.32342	0.000633846	0.0701375	0.0701375
Znf638	4.10643	0.000760244	0.0754215	0.0754215
Trmt1	4.21799	0.000740335	0.0788868	0.0754215
Fam169a	4.09543	0.000750282	0.0770915	0.0754215
Tcof1	4.08338	0.000852528	0.0817574	0.0801546
Rngtt	4.16602	0.000876782	0.081371	0.0801546
Rbpms	4.05953	0.000919395	0.0801546	0.0801546
Fubp3	4.06462	0.000901106	0.0810151	0.0801546
Selh	4.05134	0.000960173	0.0812476	0.0812476
Rnaseh2b	3.9806	0.00105155	0.0840361	0.0834509
Prpf3	3.99237	0.00107323	0.0834509	0.0834509
Blm	3.964	0.00103609	0.0851663	0.0834509
Dhfr	3.97611	0.00124827	0.0945071	0.0945071
Ssb	3.96962	0.00133465	0.0959946	0.0959946
Gsta4	3.91501	0.0013072	0.0964309	0.0959946
Toe1	3.84897	0.00145141	0.0994219	0.0994219
Scaf1	3.88537	0.00144502	0.101398	0.0994219
Ccnk	3.84816	0.00162725	0.108875	0.108875
Rprd2	3.78931	0.00177453	0.11603	0.11373
Myef2	3.83187	0.00177888	0.11373	0.11373
Gemin6	3.79679	0.00197682	0.121007	0.121007
Dhx9	3.78222	0.00194168	0.121439	0.121007
Sap30	3.68643	0.00207377	0.124297	0.124297
Snrnp70	3.7816	0.00212574	0.124811	0.124811
Rbmx2	3.47758	0.00230802	0.132803	0.132803
Phax	3.50553	0.00284356	0.16041	0.16041
U2af1	3.55134	0.00312613	0.172959	0.168639
Thumpd3	3.45079	0.00332691	0.17092	0.168639
Tardbp	3.55906	0.00323863	0.172547	0.168639
Pgls	3.52951	0.00317005	0.17208	0.168639
Hmgb2	3.50371	0.00334112	0.168639	0.168639
Herc1	3.56672	0.00324243	0.169609	0.168639
Lrrc40	3.44109	0.003661	0.17852	0.17852
Kifc1	3.39519	0.00363481	0.180299	0.17852
Nolc1	3.37274	0.00400929	0.192245	0.190616
Fus	3.32828	0.00404157	0.190616	0.190616
Esd	3.31925	0.00412441	0.191386	0.191386
Tppp3	3.26035	0.00437698	0.199882	0.199882
Sugt1	3.27776	0.00446614	0.200767	0.200767
Tagln	3.22751	0.00463828	0.205297	0.201284
Prpf40a	3.18382	0.00475011	0.203971	0.201284
Hspb1	3.19676	0.00482745	0.201284	0.201284
Elavl1	3.22041	0.00470146	0.204941	0.201284
Ass1	3.20122	0.0047969	0.202951	0.201284
Tdrd1	3.1938	0.00491804	0.202131	0.201476
Mif	3.1387	0.00516522	0.203566	0.201476
Kif22	3.16859	0.00497799	0.201714	0.201476
Dhx36	3.13536	0.00525225	0.201476	0.201476
Akap8	3.17168	0.00512875	0.204936	0.201476
Acat2	3.15427	0.00520432	0.202336	0.201476
Fubp1	3.11207	0.00545211	0.206391	0.204995
Fam208a	3.10784	0.00548649	0.204995	0.204995
Usp26	3.05954	0.00565438	0.20856	0.20742
Snrpa	3.04625	0.00569558	0.20742	0.20742
Dnajc24	3.07527	0.0058154	0.209136	0.209136
Txn	2.95626	0.00618908	0.217146	0.217146
Sf3a2	2.9823	0.00616485	0.218966	0.217146
Gemin2	3.00043	0.00634617	0.219975	0.218949
Crip2	2.99988	0.00639267	0.218949	0.218949
Ddx20	2.97996	0.00685477	0.232014	0.232014
Tra2a	2.92651	0.00697036	0.233183	0.233183
Dgcr8	2.86524	0.00721078	0.238453	0.238453
Utp14a	2.80523	0.00787295	0.248906	0.247736
Snrpd3	2.81274	0.00765773	0.250355	0.247736
Parp1	2.80765	0.00772791	0.249811	0.247736
Gemin5	2.79564	0.00785797	0.251193	0.247736
Eif2a	2.81862	0.00792204	0.247736	0.247736
Dido1	2.79945	0.00803914	0.248695	0.248695
>sp|Q8CFE2|CD027_MOUSE	2.833	0.00815761	0.249675	0.249675
Srsf10	2.72381	0.00882678	0.267312	0.265384
S100a6	2.76529	0.00885536	0.265384	0.265384
Snrpb	2.72337	0.00901024	0.267242	0.267242
Thrap3	2.65488	0.00943349	0.27694	0.27694
Son	2.62601	0.0100297	0.285697	0.283272
Snrpe	2.61958	0.0101415	0.283272	0.283272
Rcc2	2.63647	0.01006	0.283752	0.283272
Hnrnpf	2.62723	0.00988722	0.284455	0.283272
Glrx3	2.68964	0.00983591	0.285838	0.283272
Csrp1	2.61091	0.0102754	0.284252	0.284252
Sltm	2.58754	0.0107337	0.291329	0.288861
Rbm6	2.57516	0.0105446	0.288922	0.288861
Luc7l3	2.56116	0.0107432	0.288861	0.288861
Zc3h18	2.54186	0.0112608	0.297223	0.290974
Snrpc	2.52576	0.0112796	0.295013	0.290974
Rbm7	2.56463	0.0111761	0.29772	0.290974
Psmd5	2.50786	0.0114392	0.293844	0.290974
Ncbp1	2.55172	0.0113219	0.293451	0.290974
Jmjd6	2.5335	0.0114439	0.291363	0.290974
Eri1	2.52941	0.0115297	0.290974	0.290974
Snrpd1	2.49803	0.0116918	0.292499	0.292499
Zcchc8	2.4848	0.0123285	0.303156	0.303156
Srsf5	2.48233	0.0122421	0.303626	0.303156
Suclg2	2.43311	0.0130602	0.313119	0.311574
Snrpg	2.43859	0.0133207	0.311574	0.311574
Sbds	2.40797	0.0129258	0.3125	0.311574
Nxf1	2.45356	0.0127919	0.311884	0.311574
LRWD1	2.42269	0.0132157	0.314228	0.311574
Ewsr1	2.43916	0.0132553	0.312586	0.311574
Tra2b	2.39152	0.0139882	0.32455	0.32455
Srsf7	2.35807	0.0148052	0.335391	0.33334
Sap18	2.34903	0.0148306	0.33334	0.33334
Pnisr	2.36166	0.0147918	0.337746	0.33334
Armcx1	2.39703	0.0146903	0.338112	0.33334
Hnrnpul2	2.37346	0.0149617	0.33368	0.33368
Srsf11	2.29727	0.0152217	0.336868	0.336868
Srrm2	2.35259	0.0155016	0.337865	0.337865
Actl6a	2.30352	0.0153929	0.338056	0.337865
Pus10	2.31311	0.0158888	0.3437	0.3437
Mcm6	2.35356	0.0161107	0.3459	0.3459
Daxx	2.26019	0.0163343	0.348102	0.348102
Rnmt	2.27528	0.0166076	0.34876	0.34876
Farsa	2.24082	0.0165039	0.349131	0.34876
Wtap	2.25688	0.0169142	0.352625	0.352625
Pcnp	2.2171	0.0170813	0.353546	0.353546
Rsrc2	2.21204	0.0176391	0.362484	0.362266
Hnrnpc	2.22532	0.0177544	0.362266	0.362266
Xpo5	2.19086	0.0183847	0.36988	0.367412
Ncoa5	2.17863	0.018364	0.372065	0.367412
Cherp	2.17676	0.0183897	0.367412	0.367412
Gfm1	2.14209	0.0186484	0.367475	0.367475
>sp|Q8BH50|CR025_MOUSE	2.15539	0.0185463	0.367984	0.367475
Zfp207	2.23276	0.0189312	0.368007	0.368007
Sf3b2	2.21945	0.0189063	0.370023	0.368007
Srsf3	2.15282	0.0195467	0.374905	0.369281
Rbm25	2.15316	0.0195665	0.3728	0.369281
Rbm14	2.13694	0.0195749	0.370507	0.369281
Celf1	2.22311	0.0196385	0.369281	0.369281
Casp3	2.1652	0.0193478	0.373582	0.369281
Zc3h10	2.1109	0.0204109	0.376425	0.371422
Snrnp40	2.10531	0.0207852	0.371422	0.371422
Sf1	2.10323	0.0206755	0.37411	0.371422
Pin1	2.19007	0.020093	0.375374	0.371422
Phrf1	2.16596	0.0204137	0.374079	0.371422
Eif4a3	2.0955	0.0206503	0.376019	0.371422
Cpsf6	2.11909	0.0201225	0.3735	0.371422
Ccnl1	2.16417	0.0207321	0.372789	0.371422
Clybl	2.05888	0.0209178	0.371484	0.371484
U2surp	2.09543	0.0212763	0.375533	0.375533
Ppwd1	2.09094	0.0214631	0.37652	0.376196
Gapdh	2.07572	0.0215754	0.376196	0.376196
Ddx5	2.06213	0.0221145	0.383274	0.383274
Zc3h13	2.05695	0.0226847	0.386176	0.386176
Rbm27	2.05279	0.0225968	0.386971	0.386176
Pfkp	2.04321	0.0224436	0.386649	0.386176
Ythdc1	1.99941	0.022867	0.38699	0.38699
Rbm10	2.0106	0.0234393	0.394357	0.394357
Snw1	1.9854	0.0241464	0.40389	0.40389
Rbm39	1.96808	0.0248767	0.413701	0.413701
Trnt1	1.97515	0.0252979	0.415897	0.413777
Snrpd2	2.11071	0.0251033	0.415069	0.413777
Ppp1r10	1.97054	0.0256774	0.417367	0.413777
Ppa2	1.91707	0.0260318	0.413777	0.413777
Mrpl45	2.08767	0.0254011	0.415221	0.413777
Magohb	1.96962	0.0259118	0.416471	0.413777
Erh	1.99391	0.0259225	0.414328	0.413777
Ddx39a	1.99722	0.0258264	0.41743	0.413777
Incenp	1.98303	0.0267455	0.422785	0.422785
Msh2	1.96811	0.0269779	0.424128	0.424128
Plrg1	1.89846	0.0272039	0.425357	0.425357
Setd2	1.92147	0.0273524	0.425366	0.425366
Pfn1	1.93235	0.0279944	0.433009	0.432964
Mtif2	1.91009	0.0281419	0.432964	0.432964
Mrps24	1.89137	0.0295804	0.452675	0.452519
Cecr5	1.84105	0.0297275	0.452519	0.452519
Ppil1	2.02732	0.0300477	0.452603	0.452603
Nono	1.87729	0.0299042	0.452812	0.452603
Plaa	1.83052	0.0302311	0.452993	0.452993
Dhx38	1.85988	0.0304283	0.453587	0.453587
Pecr	1.77317	0.0308182	0.457031	0.457031
Top2a	1.84056	0.0319367	0.466406	0.466406
Akap12	1.76872	0.031813	0.46697	0.466406
Acaa2	1.84256	0.031686	0.467491	0.466406
Msh6	1.83111	0.0323173	0.469581	0.469581
Zfr	1.81383	0.0328427	0.472442	0.472085
Pc	1.76185	0.032982	0.472085	0.472085
Paxbp1	1.79386	0.0326716	0.472343	0.472085
Wdr33	1.7666	0.0340983	0.478541	0.474529
Pccb	1.72385	0.0341567	0.477033	0.474529
L1td1	1.7739	0.0343073	0.474529	0.474529
Kdm5b	1.80251	0.0342	0.475331	0.474529
Hnrnpl	1.793	0.033515	0.474989	0.474529
Cdc5l	1.81743	0.0333864	0.475508	0.474529
Acads	1.92162	0.033918	0.478343	0.474529
Prpf19	1.78669	0.0345329	0.475364	0.475364
Acsf3	1.70512	0.0347513	0.476092	0.476092
Parn	1.746	0.0354904	0.483914	0.481775
Acaca	1.68692	0.035501	0.481775	0.481775
Txnl4a	1.73103	0.0365718	0.487116	0.487116
Pck2	1.68478	0.0364444	0.489956	0.487116
Kiaa0391	1.68261	0.0364766	0.488108	0.487116
Crnkl1	1.73261	0.0361436	0.488193	0.487116
Dazap1	1.72741	0.0372568	0.493953	0.493953
Sf3b1	1.70662	0.0375144	0.495087	0.495087
Srrt	1.69769	0.0377942	0.496503	0.496503
Pitrm1	1.66098	0.0380669	0.497811	0.497811
Hnrnpab	1.69052	0.0385949	0.502433	0.502433
Mccc2	1.64651	0.039269	0.504361	0.504361
Gcdh	1.69123	0.0389259	0.504459	0.504361
Cbr4	1.67964	0.0392082	0.505839	0.504361
Snrnp27	1.67241	0.0397387	0.508125	0.507017
Rab9a	1.63753	0.0400045	0.507017	0.507017
Hnrnpu	1.66741	0.0398598	0.507419	0.507017
Timm8b	1.65812	0.0404896	0.510915	0.508282
Srsf4	1.69504	0.0406343	0.508282	0.508282
Snrnp200	1.65453	0.0406199	0.51032	0.508282
Ndufa10	1.61259	0.0410786	0.511615	0.511615
Mcm7	1.64144	0.0414281	0.513744	0.51191
Gfpt2	1.63519	0.0414581	0.51191	0.51191
Gtf2e2	1.62462	0.042214	0.519016	0.517371
Cfdp1	1.63406	0.04226	0.517371	0.517371
Tefm	1.58389	0.0433701	0.519899	0.518034
Slc25a4	1.59734	0.0429965	0.521944	0.518034
Gtf3c2	1.62317	0.0435746	0.518034	0.518034
Ddx42	1.61463	0.043532	0.519674	0.518034
Bcas2	1.62104	0.0433113	0.521367	0.518034
Aldh4a1	1.59612	0.042796	0.521712	0.518034
Aars2	1.58249	0.0430821	0.520786	0.518034
Tial1	1.60357	0.0445204	0.522796	0.522796
Rbmx	1.57612	0.0444024	0.523548	0.522796
Acadm	1.57627	0.0443552	0.525144	0.522796
Srek1	1.55747	0.0449796	0.526042	0.524636
Oxnad1	1.53017	0.0452241	0.524636	0.524636
Etfdh	1.56364	0.0451888	0.526349	0.524636
Sf3a1	1.54302	0.0461882	0.52523	0.52523
Matr3	1.57138	0.0455304	0.526068	0.52523
Hnrnpa3	1.61775	0.0460572	0.52582	0.52523
Cstf2	1.59166	0.0456903	0.525804	0.52523
Chchd2	1.56073	0.0459327	0.526487	0.52523
Fyttd1	1.5596	0.0466071	0.527908	0.527908
Acadsb	1.55229	0.0470699	0.53106	0.53106
Ndufb5	1.57584	0.0473767	0.532433	0.532433
Sfpq	1.51889	0.0481102	0.536485	0.536485
Acad9	1.52847	0.048079	0.538222	0.536485
Ywhaz	1.55936	0.0484343	0.538014	0.538014
Rfx1	1.58273	0.04966	0.545313	0.545313
Pnn	1.49199	0.0495361	0.548136	0.545313
Mid1ip1	1.49553	0.04957	0.546409	0.545313
Prpf6	1.51299	0.0509334	0.550885	0.549448
Prpf38a	1.53793	0.0502557	0.549756	0.549448
Pcca	1.51128	0.0505677	0.551073	0.549448
Hars2	1.50409	0.050707	0.550506	0.549448
Fastkd2	1.53037	0.0511755	0.55143	0.549448
Eci1	1.49471	0.0513735	0.549448	0.549448
>sp|Q0VG62|CH059_MOUSE	1.52416	0.0513138	0.550857	0.549448
U2af2	1.52626	0.0518404	0.55035	0.549843
Sugp1	1.51994	0.0518177	0.552147	0.549843
Med1	1.46915	0.0521749	0.549843	0.549843
Lyrm4	1.48882	0.052091	0.550978	0.549843
Srsf1	1.49347	0.0526038	0.55234	0.55234
Smndc1	1.44532	0.0533057	0.557675	0.557675
Acot13	1.45383	0.0537435	0.560218	0.560218
Tcerg1	1.44789	0.0543492	0.564486	0.564486
Hnrnpa2b1	1.43639	0.055115	0.570381	0.570381
Rfc4	1.44495	0.0554052	0.571329	0.571329
Supt5h	1.42984	0.0557139	0.57246	0.571985
Ivd	1.41654	0.0565004	0.572365	0.571985
Chek1	1.42209	0.0566617	0.571985	0.571985
Cdk11b	1.42549	0.0562761	0.574136	0.571985
Acd	1.42312	0.0563589	0.572948	0.571985
Acacb	1.43119	0.0558865	0.57219	0.571985
Acadl	1.42354	0.0569321	0.572705	0.572705
Acot10	1.42768	0.0573525	0.574924	0.574924
Puf60	1.41975	0.0577268	0.576667	0.576667
Gsr	1.40643	0.058391	0.581284	0.581284
Tdh	1.38533	0.0590286	0.583592	0.583592
Fip1l1	1.39621	0.0589611	0.584935	0.583592
Rbm5	1.40066	0.0593179	0.584444	0.584444
Smu1	1.41057	0.0605549	0.584619	0.584619
Mterf4	1.41009	0.0604056	0.587118	0.584619
Mrps30	1.53271	0.0604753	0.585817	0.584619
Kiaa1429	1.39016	0.0601902	0.587008	0.584619
Cstf3	1.39337	0.059772	0.584912	0.584619
Aldh2	1.39432	0.059591	0.585131	0.584619
Ik	1.38755	0.0610944	0.587855	0.587855
Wdr61	1.354	0.0637046	0.598948	0.588481
Pycr2	1.35129	0.0645966	0.589983	0.588481
Prpf38b	1.35201	0.06424	0.596189	0.588481
Poldip3	1.38126	0.0620519	0.595077	0.588481
Nln	1.33291	0.0646368	0.588481	0.588481
Mccc1	1.35482	0.0631297	0.595489	0.588481
Luc7l2	1.3724	0.0624097	0.596521	0.588481
Ldha	1.35138	0.0642866	0.592797	0.588481
Khsrp	1.3492	0.0645099	0.591067	0.588481
Iars2	1.34596	0.0642657	0.59451	0.588481
Hnrnpdl	1.35732	0.0638624	0.598476	0.588481
Gls	1.36027	0.0630812	0.598959	0.588481
Fdxr	1.3297	0.0639676	0.597516	0.588481
Fam76b	1.36109	0.062946	0.599654	0.588481
Etv6	1.33515	0.0640036	0.595917	0.588481
Eftud2	1.36345	0.0630904	0.597076	0.588481
C1qbp	1.32446	0.0644232	0.592158	0.588481
Xrn2	1.35042	0.0648533	0.58859	0.58859
Brsk2	1.32426	0.0653136	0.590903	0.590656
Bckdhb	1.31535	0.0656627	0.5922	0.590656
Atp5f1	1.32999	0.0656968	0.590656	0.590656
Smarcal1	1.30568	0.0669763	0.591076	0.591076
Khdrbs1	1.31802	0.0667294	0.592532	0.591076
Hint1	1.34565	0.0660805	0.592254	0.591076
Ddx28	1.32553	0.0668269	0.591572	0.591076
Cpsf3	1.32006	0.0662835	0.592229	0.591076
Amt	1.32499	0.0665708	0.592954	0.591076
Zc3h4	1.29696	0.0685818	0.601555	0.600669
Rbpj	1.31409	0.0685382	0.60301	0.600669
Nanp	1.29937	0.0686897	0.600669	0.600669
Raver1	1.29831	0.0698232	0.603247	0.603247
Myg1	1.30628	0.0697342	0.604293	0.603247
Mrpl4	1.29538	0.0696503	0.60539	0.603247
Isy1	1.30971	0.0695167	0.606059	0.603247
Vprbp	1.26621	0.0719994	0.616495	0.613919
Supt6h	1.29704	0.0722209	0.614733	0.613919
Set	1.27279	0.0726551	0.616604	0.613919
Ptcd1	1.27942	0.0717476	0.618017	0.613919
Prpf8	1.27905	0.0728217	0.6162	0.613919
Prpf4b	1.28371	0.0720466	0.615069	0.613919
Ndufb11	1.26355	0.0729034	0.615083	0.613919
Ncbp2	1.28958	0.0717814	0.616463	0.613919
Cpsf2	1.27601	0.0729789	0.613919	0.613919
Rbm17	1.26103	0.0738707	0.617808	0.617808
Chtop	1.25444	0.0737708	0.618771	0.617808
Cdca8	1.24176	0.0745745	0.621887	0.621887
Sap30bp	1.24848	0.074938	0.623112	0.623112
Hnrnpul1	1.23802	0.0752293	0.623731	0.623731
Sf3b3	1.26626	0.0755565	0.624644	0.62421
Sart1	1.22685	0.0757392	0.62436	0.62421
Rbm42	1.2366	0.0767366	0.627191	0.62421
Pgm2	1.22971	0.0768222	0.626112	0.62421
Mthfd1l	1.23536	0.0762093	0.62644	0.62421
Mrps6	1.23465	0.0769226	0.625159	0.62421
Cpsf7	1.25404	0.0764221	0.6264	0.62421
Atxn10	1.2195	0.0770228	0.62421	0.62421
Usp5	1.21737	0.0781128	0.631265	0.628851
Rbfox2	1.20266	0.0788993	0.630537	0.628851
Leng8	1.21831	0.0785777	0.631475	0.628851
Hmga1	1.2161	0.0787375	0.630997	0.628851
Cox4i1	1.1906	0.07836	0.63149	0.628851
Cdk13	1.23849	0.0789069	0.628851	0.628851
Alyref	1.20964	0.0791715	0.629217	0.629217
Hnrnpm	1.2219	0.0796542	0.631309	0.62975
Atpaf1	1.20803	0.0796764	0.62975	0.62975
Hnrnpk	1.20554	0.0807175	0.63623	0.63623
Ash2l	1.19967	0.0812916	0.639005	0.639005
Tut1	1.19568	0.0824487	0.644579	0.643966
Rpa1	1.18708	0.0828181	0.643966	0.643966
Rars2	1.19242	0.0826033	0.644037	0.643966
Kbtbd8	1.18026	0.0821982	0.644371	0.643966
Prpf31	1.19516	0.0835061	0.644094	0.644094
Me2	1.14244	0.0833301	0.644464	0.644094
Dhx8	1.18873	0.0831949	0.645153	0.644094
Sfn	1.38921	0.0841954	0.647674	0.647674
Tinf2	1.15824	0.0860493	0.660171	0.658837
Hnrnpd	1.16127	0.0861045	0.658837	0.658837
Rad54l	1.15688	0.0868571	0.662833	0.662069
Gldc	1.1616	0.0869872	0.662069	0.662069
Pdk3	1.14342	0.0880032	0.668035	0.668035
Gnl3	1.15301	0.0884029	0.669303	0.668225
Acat1	1.15033	0.0884928	0.668225	0.668225
Rbm15	1.15078	0.0891052	0.669336	0.668615
Hibadh	1.14417	0.0892416	0.668615	0.668615
Ddx23	1.1353	0.0888274	0.668996	0.668615
Vars2	1.12988	0.0895988	0.669547	0.668668
Aqr	1.12993	0.0897135	0.668668	0.668668
Dnaja3	1.13271	0.0904233	0.672217	0.672217
Sbno1	1.11822	0.0908376	0.673556	0.673556
Mnat1	1.11268	0.0912484	0.674863	0.674863
Fam32a	1.11356	0.0929855	0.685947	0.685947
Scaf8	1.10287	0.0943633	0.689044	0.687941
Pml	1.1053	0.0940541	0.688533	0.687941
Mocs1	1.10801	0.0937503	0.68982	0.687941
Asns	1.09017	0.0944514	0.687941	0.687941
Armc10	1.06947	0.0937747	0.688239	0.687941
Ccar1	1.08213	0.0952425	0.690208	0.688515
Aurkb	1.10182	0.0948472	0.689079	0.688515
>sp|Q8BZR9|CQ085_MOUSE	1.0809	0.0952482	0.688515	0.688515
Zmat3	1.08919	0.0960548	0.689151	0.689151
Trmt2a	1.08689	0.0960058	0.690521	0.689151
Ngrn	1.09739	0.0959515	0.691861	0.689151
Rbm8a	1.07439	0.096391	0.689843	0.689843
Eci2	1.06622	0.0968364	0.691311	0.691311
Cpsf4	1.08884	0.0971059	0.691519	0.691519
Dnajc9	1.07847	0.0980007	0.694453	0.694453
Dna2	1.07459	0.097934	0.695694	0.694453
Trim28	1.0636	0.098279	0.694714	0.694714
Znhit6	1.0514	0.100072	0.695428	0.695428
Xpot	1.04665	0.0995738	0.700425	0.695428
Sympk	1.0698	0.0992444	0.699819	0.695428
Prpf39	1.05124	0.0997788	0.698452	0.695428
Igh-3	1.05737	0.0997233	0.699766	0.695428
Cdk12	1.04815	0.0998953	0.69757	0.695428
Cdc40	1.0559	0.100001	0.696617	0.695428
Prdx3	1.04446	0.100927	0.698	0.697836
Pin4	1.05829	0.101364	0.699341	0.697836
Mphosph8	1.04271	0.101389	0.697836	0.697836
Ddx17	1.05086	0.100757	0.6985	0.697836
Thoc1	1.04149	0.102154	0.699753	0.699753
Plekha2	1.03114	0.102064	0.700808	0.699753
Pdk1	1.05405	0.103324	0.70609	0.70609
Ppp1r8	1.02258	0.104058	0.70774	0.706347
Hnrnpll	1.02078	0.103806	0.707703	0.706347
Cpsf1	1.03287	0.104098	0.706347	0.706347
Nudt21	1.03484	0.104726	0.707266	0.706504
Fnbp4	1.02555	0.105028	0.707645	0.706504
Dctd	1.00971	0.105104	0.706504	0.706504
Cth	1.01923	0.104693	0.708711	0.706504
Sf3b5	1.0125	0.105813	0.709612	0.709612
Wbp11	0.966844	0.106468	0.710692	0.710692
Rbm22	0.979617	0.106409	0.711954	0.710692
Tfip11	1.00141	0.108045	0.717886	0.71788
Mrpl14	1.00257	0.10798	0.719118	0.71788
Dstn	0.997283	0.108293	0.71788	0.71788
Dhx35	0.986716	0.108883	0.720127	0.720127
Paxip1	0.991258	0.109766	0.724306	0.724306
Cox6c	0.995026	0.110254	0.725861	0.725861
Tpx2	0.980722	0.110719	0.727255	0.727255
Metap1	1.42749	0.111204	0.728781	0.728781
Ddx41	0.97446	0.11152	0.729187	0.729187
Znf622	0.973385	0.112112	0.729745	0.729745
Prcc	0.981207	0.112017	0.730777	0.729745
Dhtkd1	0.970322	0.112443	0.730244	0.730244
Gatad2a	0.974836	0.113153	0.731555	0.7307
Fh	0.968049	0.11303	0.732402	0.7307
Etfb	0.958047	0.113275	0.7307	0.7307
Polr2j	0.959838	0.114306	0.735698	0.734454
Herc4	0.967669	0.114368	0.734454	0.734454
Rpl6	0.962166	0.115274	0.736984	0.736984
Papolg	0.962327	0.11509	0.737448	0.736984
Ncor1	0.9907	0.115653	0.737766	0.737766
Hells	0.957071	0.116204	0.738011	0.738011
Atp5o	0.948022	0.116118	0.739097	0.738011
Nufip1	0.951436	0.116844	0.740439	0.740439
Skiv2l2	0.95111	0.117761	0.741354	0.74131
Sirt5	0.952135	0.117485	0.742868	0.74131
Ogdhl	0.91655	0.118012	0.74131	0.74131
Ep300	0.928346	0.117567	0.741753	0.74131
Sucla2	0.941914	0.118314	0.741586	0.741586
Supv3l1	0.924912	0.119128	0.743453	0.742437
Stat3	0.924511	0.118823	0.743163	0.742437
Sarnp	0.941594	0.119223	0.742437	0.742437
Strbp	0.916759	0.120406	0.744962	0.74372
Pnpt1	0.920182	0.120268	0.745711	0.74372
Nacc1	0.927317	0.120068	0.746081	0.74372
Cmpk1	0.928323	0.120464	0.74372	0.74372
Dhx15	0.924539	0.120746	0.743867	0.743867
Gfm2	0.903004	0.121899	0.749367	0.749367
Cstf1	0.904984	0.122588	0.751998	0.751998
Pspc1	0.884301	0.125666	0.769237	0.769237
Lsm2	0.881513	0.126321	0.771605	0.771605
Ppie	0.890096	0.127631	0.777955	0.777724
Atp5h	0.872795	0.127864	0.777724	0.777724
Mtmr9	0.886962	0.128661	0.779278	0.779278
Hexim1	0.895879	0.128551	0.780255	0.779278
Tbrg4	0.864746	0.129913	0.785208	0.785208
Polr2b	0.879871	0.130461	0.786866	0.786866
Znf318	0.880719	0.131201	0.788029	0.787331
Pus1	0.854726	0.131359	0.787331	0.787331
Acin1	0.855021	0.130941	0.78811	0.787331
Atp5c1	0.854616	0.131861	0.788697	0.788697
Ipo11	0.844408	0.132281	0.789569	0.789569
Prdx6	0.8653	0.133502	0.795209	0.794214
Ndufv2	0.839676	0.133611	0.794214	0.794214
Suclg1	0.875355	0.134011	0.794946	0.794946
Pcbp1	0.836844	0.135107	0.798157	0.798157
Bclaf1	0.833627	0.134998	0.799157	0.798157
Xrcc6	0.844343	0.136566	0.801839	0.798863
Plk1	0.828328	0.136573	0.800245	0.798863
Clp1	0.855005	0.136615	0.798863	0.798863
Ahcyl1	0.824541	0.136208	0.801372	0.798863
Acadvl	0.833136	0.135641	0.799668	0.798863
Idh2	0.838732	0.136904	0.798931	0.798931
Wdr5	0.838865	0.137678	0.800203	0.799421
Tfe3	0.834333	0.138823	0.800388	0.799421
Rbm12b1	0.816739	0.137675	0.801804	0.799421
Kat7	0.820771	0.138489	0.803294	0.799421
Ift20	0.806367	0.138726	0.803045	0.799421
Ddx21	0.812903	0.138933	0.799421	0.799421
Cpsf3l	0.835557	0.13876	0.801629	0.799421
Mrpl19	0.825601	0.139599	0.800053	0.800053
Ddx46	0.802975	0.139411	0.800569	0.800053
Ugdh	0.823132	0.14016	0.800077	0.800077
Ctr9	0.805294	0.140132	0.801513	0.800077
Usp48	0.804174	0.141115	0.800766	0.800766
Ogt	0.822033	0.140996	0.801673	0.800766
Dxo	0.848695	0.140593	0.80096	0.800766
Gpt2	0.801812	0.141676	0.802365	0.802365
Mrpl40	0.793537	0.142438	0.80352	0.80352
Echs1	0.792769	0.142246	0.804014	0.80352
Uba1	0.785623	0.143903	0.805467	0.805467
Nsfl1c	0.799285	0.143734	0.806088	0.805467
Aldh6a1	0.774819	0.143646	0.807169	0.805467
Ahcy	0.800104	0.143538	0.808141	0.805467
Numa1	0.861998	0.14451	0.807289	0.807289
Zfc3h1	0.778613	0.147716	0.81103	0.808794
Trit1	0.810574	0.148152	0.808794	0.808794
Tcea1	0.780007	0.147759	0.809721	0.808794
Srm	0.782997	0.145739	0.811011	0.808794
Sh3bp1	0.813328	0.148041	0.809723	0.808794
Safb2	0.762014	0.146451	0.811831	0.808794
Pdcd2	0.772957	0.147183	0.812753	0.808794
Nob1	0.815683	0.146716	0.811734	0.808794
Heatr3	0.783331	0.145735	0.812557	0.808794
Gars	0.772851	0.14744	0.812613	0.808794
Cisd3	0.767491	0.146335	0.812752	0.808794
Bub3	0.782143	0.147592	0.811898	0.808794
Ndufa7	0.775802	0.148773	0.810645	0.810645
Usp34	0.771517	0.150003	0.81426	0.81426
Oard1	0.774495	0.149878	0.815123	0.81426
Dnmt1	0.805055	0.150317	0.814429	0.814429
Thop1	0.780724	0.152241	0.820221	0.819445
Pcf11	0.748608	0.151879	0.819804	0.819445
Mthfd2	0.755918	0.152382	0.819445	0.819445
Ddx1	0.783725	0.151721	0.82049	0.819445
Lrpprc	0.732438	0.15294	0.820909	0.820909
Kif15	0.727909	0.153362	0.821644	0.821644
Zc3h14	0.726609	0.154254	0.824886	0.824886
Psg20	0.741552	0.154992	0.827294	0.827294
FRRS1	0.766307	0.155739	0.829743	0.829743
Ndufs3	0.725937	0.156204	0.830684	0.830684
Tnpo1	0.777891	0.15717	0.834277	0.833429
Ing2	0.750208	0.1573	0.833429	0.833429
Mybbp1a	0.736364	0.159357	0.841232	0.840866
Morf4l2	0.726033	0.159299	0.842469	0.840866
Kin	0.726595	0.159873	0.840866	0.840866
Akap8l	0.734902	0.15971	0.841549	0.840866
Siah1b	0.758344	0.16115	0.841432	0.840998
Shcbp1	0.707317	0.160974	0.842042	0.840998
Ighg	0.702517	0.160636	0.841804	0.840998
Hspe1	0.719182	0.161359	0.840998	0.840998
Gpatch1	0.706557	0.160321	0.841685	0.840998
Upf1	0.694928	0.163174	0.848916	0.848705
Prpf4	0.715424	0.163428	0.848705	0.848705
Tufm	0.680818	0.165876	0.853714	0.8524
Thoc2	0.71149	0.165723	0.855988	0.8524
Prmt1	0.735701	0.164676	0.853646	0.8524
Idh3a	0.744258	0.165744	0.854559	0.8524
Gmps	0.703482	0.165917	0.8524	0.8524
Gm20521	0.70598	0.16549	0.856324	0.8524
Tatdn2	0.710996	0.166459	0.853659	0.853659
Pak1ip1	0.696961	0.167291	0.85488	0.85488
Acad8	0.673562	0.167143	0.855644	0.85488
Emg1	0.674595	0.168166	0.857825	0.857825
Zfp384	0.694982	0.169038	0.859226	0.859226
Ict1	0.673206	0.168953	0.860315	0.859226
Rfc2	0.670771	0.170365	0.861406	0.86056
Krt82	0.763996	0.169895	0.862062	0.86056
Ints4	0.670645	0.170497	0.86056	0.86056
Hnrnpr	0.671889	0.170157	0.861869	0.86056
Morf4l1	0.666068	0.173539	0.874383	0.874255
Csnk1a1	0.654952	0.173818	0.874255	0.874255
Usp7	0.676783	0.174395	0.875629	0.874287
Usp28	0.654134	0.174736	0.874287	0.874287
Cul4b	0.658069	0.174448	0.874369	0.874287
Ppid	0.661279	0.177361	0.882815	0.882815
Ntan1	0.665485	0.17733	0.884192	0.882815
Kdm6a	0.637743	0.176922	0.883688	0.882815
Atrx	0.641874	0.177903	0.883986	0.883676
Aco2	0.637886	0.178148	0.883676	0.883676
Trim24	0.644563	0.178722	0.884996	0.884996
Uqcrc2	0.630218	0.181463	0.889386	0.886629
Sub1	0.654507	0.180346	0.889975	0.886629
Rbm26	0.658699	0.179643	0.888027	0.886629
Polr2g	0.649934	0.181741	0.887722	0.886629
Ogdh	0.628986	0.181179	0.891031	0.886629
Mov10	0.645629	0.181825	0.886629	0.886629
Kdm4a	0.632431	0.180587	0.889639	0.886629
Cggbp1	0.660645	0.181237	0.889794	0.886629
Cct5	0.629107	0.181575	0.88842	0.886629
Mcm2	0.639058	0.184283	0.888078	0.886954
Ilf3	0.635065	0.182819	0.888466	0.886954
Fasn	0.612749	0.184009	0.889738	0.886954
Cwf19l2	0.633193	0.184358	0.886954	0.886954
Chmp2a	0.608843	0.183281	0.889208	0.886954
Atad3	0.646964	0.182813	0.889938	0.886954
Aldh1l2	0.610643	0.183358	0.888082	0.886954
Alas1	0.800163	0.184028	0.888338	0.886954
Serpinb6	0.68075	0.18919	0.90415	0.903941
Polr2a	0.610162	0.18946	0.903941	0.903941
Orc4	0.607811	0.188598	0.904326	0.903941
Ociad1	0.653615	0.18884	0.903979	0.903941
Hnrnpa1	0.626652	0.188537	0.905543	0.903941
Prkrip1	0.575455	0.190959	0.906585	0.906585
Cfb	0.584304	0.190621	0.907976	0.906585
Api5	0.599752	0.190769	0.907177	0.906585
Mybl2	0.601639	0.191325	0.906824	0.906824
Rtf1	0.597379	0.192434	0.909087	0.907602
Rrm1	0.596003	0.192494	0.907876	0.907602
Ccar2	0.572382	0.193067	0.907602	0.907602
Cbx1	0.596711	0.192037	0.908703	0.907602
Agpat9	0.574183	0.192812	0.907889	0.907602
Usp3	0.573155	0.20029	0.910325	0.909364
Uqcrq	0.581461	0.197607	0.909626	0.909364
Ubr7	0.571811	0.198947	0.90997	0.909364
Tceb1	0.590803	0.199602	0.911515	0.909364
Tbl3	0.605441	0.198349	0.910126	0.909364
Smc4	0.56989	0.200231	0.911493	0.909364
Pot1b	0.625068	0.19378	0.909472	0.909364
Pola1	0.603448	0.197402	0.911598	0.909364
Papola	0.574937	0.1976	0.911051	0.909364
Nt5dc2	0.588266	0.196328	0.913972	0.909364
Mrpl37	0.608651	0.197285	0.912521	0.909364
Lsm7	0.563687	0.200395	0.909364	0.909364
Kntc1	0.592569	0.194379	0.910793	0.909364
Kif4	0.590075	0.194563	0.910176	0.909364
Hn1l	0.566987	0.195415	0.912675	0.909364
Hk2	0.563409	0.198234	0.911051	0.909364
Gtf2h1	0.583579	0.197105	0.913157	0.909364
Dnaja2	0.58882	0.200185	0.91273	0.909364
Cdc73	0.587263	0.195732	0.912677	0.909364
Atic	0.576454	0.196503	0.913309	0.909364
Arid1a	0.587482	0.196903	0.913692	0.909364
Ago2	0.582348	0.198719	0.910374	0.909364
Lpp	0.568354	0.200928	0.910347	0.910347
Crebbp	0.577094	0.201528	0.91163	0.91163
Sec31a	0.566437	0.202822	0.916041	0.916041
Adss	0.559226	0.204697	0.923061	0.923061
Clpb	0.556292	0.205257	0.924138	0.924138
Prdx2	0.588259	0.206143	0.925233	0.925233
Pitpna	0.550088	0.206135	0.92664	0.925233
Wdr70	0.532011	0.210346	0.933897	0.931378
Usp39	0.53152	0.208827	0.931465	0.931378
Usp13	0.539422	0.20966	0.93229	0.931378
Psmb2	0.539245	0.211073	0.931378	0.931378
Paf1	0.539993	0.210923	0.932144	0.931378
Ncl	0.546578	0.208594	0.93187	0.931378
Mrpl38	0.548134	0.208064	0.932397	0.931378
Leo1	0.537091	0.21073	0.932725	0.931378
Ighg2c	0.532303	0.210413	0.932755	0.931378
Grpel1	0.525998	0.208515	0.932968	0.931378
Fignl1	0.541557	0.20915	0.931461	0.931378
Ppil3	0.571325	0.211618	0.932353	0.932353
Trip12	0.540989	0.212196	0.933469	0.933469
Pmpca	0.497046	0.216605	0.93993	0.939243
Parvb	0.522685	0.215417	0.94331	0.939243
Ndufa5	0.53813	0.214048	0.940179	0.939243
Nadk2	0.561112	0.215475	0.942129	0.939243
Krt40	0.579399	0.215337	0.944396	0.939243
Hist2h2aa1	0.615664	0.216155	0.942239	0.939243
Hirip3	0.506682	0.216224	0.941116	0.939243
Gcat	0.603773	0.216773	0.939243	0.939243
Cdk9	0.552037	0.216532	0.941033	0.939243
Capza2	0.523276	0.21615	0.943646	0.939243
Pnkp	0.50964	0.218176	0.943899	0.943899
Zc3h11a	0.510035	0.219927	0.948619	0.946989
Uqcrb	0.500128	0.219799	0.949492	0.946989
Letm1	0.49908	0.220273	0.94869	0.946989
Gsn	0.515914	0.220302	0.947397	0.946989
Dph6	0.495213	0.220536	0.946989	0.946989
Tpm2	0.515519	0.221439	0.949448	0.949111
Setx	0.501775	0.221718	0.949232	0.949111
Ptcd3	0.508341	0.22202	0.949111	0.949111
Suz12	0.511739	0.222619	0.95026	0.95026
Snrpa1	0.497889	0.223993	0.954709	0.954709
Zyg11b	0.476715	0.226597	0.962952	0.961864
Mrpl46	0.479685	0.226452	0.963762	0.961864
Ilf2	0.481587	0.226675	0.961864	0.961864
Mars	0.493176	0.227334	0.963241	0.962447
Hpx	0.476206	0.227481	0.962447	0.962447
Snx18	0.474025	0.229145	0.963818	0.963818
Mcm5	0.473799	0.228684	0.966116	0.963818
Mad2l1	0.47602	0.229076	0.964936	0.963818
Dkc1	0.474722	0.228729	0.964888	0.963818
Pds5a	0.487659	0.229599	0.964317	0.964317
Usp11	0.471348	0.230894	0.968343	0.967174
Srpk1	0.486673	0.231365	0.967496	0.967174
Nfkb2	0.487936	0.231082	0.967718	0.967174
C3	0.465919	0.231624	0.967174	0.967174
Rtcb	0.487634	0.23267	0.970133	0.969697
Mrps28	0.479563	0.232902	0.969697	0.969697
Hnrnph1	0.485946	0.233292	0.969917	0.969917
>sp|Q8VDP2|CX056_MOUSE	0.467617	0.233808	0.970657	0.970657
Serpina3k	0.462599	0.234145	0.970657	0.970657
Lap3	0.458099	0.235248	0.973824	0.973824
Med4	0.453232	0.235589	0.973837	0.973837
Snx5	0.445942	0.23734	0.976862	0.976862
Smarcc1	0.486046	0.236792	0.977404	0.976862
Cirbp	0.452796	0.237326	0.978206	0.976862
Nle1	0.473856	0.238389	0.97978	0.97978
Swap70	0.450618	0.239839	0.98293	0.98293
Krt31	0.455986	0.2396	0.983352	0.98293
Wdr48	0.443861	0.240758	0.985292	0.985292
Sf3a3	0.440437	0.241995	0.988949	0.987731
Nt5c3b	0.449554	0.242384	0.987731	0.987731
Lig3	0.476359	0.242173	0.988272	0.987731
Cttn	0.428127	0.243506	0.990902	0.989716
Cops2	0.465679	0.243691	0.990252	0.989716
Bckdha	0.427517	0.243903	0.989716	0.989716
Ptcd2	0.43413	0.245909	0.995049	0.993683
Mcm3	0.426744	0.245783	0.995941	0.993683
Elavl2	0.426448	0.245917	0.993683	0.993683
Tbc1d13	0.419275	0.246755	0.994278	0.994278
Nkrf	0.43178	0.246591	0.995011	0.994278
Smarcd1	0.456981	0.248172	0.997195	0.996152
Nr2c2	0.482742	0.247646	0.996474	0.996152
Elof1	0.420131	0.248259	0.996152	0.996152
Hist1h1e	0.434271	0.249429	0.999454	0.999454
Zw10	-0.433459	0.979989	1.02711	0.999828
Zranb2	-0.0101245	0.60838	1.22743	0.999828
Zpr1	0.306624	0.307386	1.08243	0.999828
Znf800	-0.129894	0.766313	1.17897	0.999828
Znf687	-0.187938	0.817475	1.16776	0.999828
Znf512	0.115417	0.48083	1.20291	0.999828
Znf148	0.404955	0.318986	1.08864	0.999828
Zmynd8	0.174415	0.388309	1.14935	0.999828
Zmym3	-0.367944	0.909135	1.10083	0.999828
Zmpste24	-0.452864	0.983265	1.02383	0.999828
Zmat5	0.0872731	0.533548	1.22801	0.999828
Zhx2	-0.588036	0.998259	1.00314	0.999828
Zfp292	-0.175616	0.784728	1.17403	0.999828
Zfp277	-0.504358	0.986565	1.02025	0.999828
Zfand6	0.0651969	0.555169	1.22674	0.999828
Zeb2	-0.387791	0.961704	1.04369	0.999828
Zdhhc5	0.0467747	0.598901	1.22636	0.999828
Zcchc17	-0.0261237	0.560315	1.22774	0.999828
Zcchc11	-0.108212	0.655366	1.22275	0.999828
Zc3hc1	-0.184269	0.792713	1.17317	0.999828
Zbtb33	-0.330575	0.931818	1.08317	0.999828
Zbtb10	-0.186195	0.772641	1.17675	0.999828
Ywhaq	-0.220459	0.817069	1.16834	0.999828
Ywhah	-0.26414	0.894429	1.12272	0.999828
Ywhag	-0.126013	0.763179	1.18621	0.999828
Ywhae	-0.304907	0.912008	1.0983	0.999828
Ywhab	-0.192311	0.729231	1.20367	0.999828
Ythdf2	-0.225356	0.853625	1.14707	0.999828
Ythdf1	0.407669	0.259007	1.02217	0.999828
Ythdc2	-0.00656768	0.570026	1.23213	0.999828
Yme1l1	-0.00750323	0.603467	1.22698	0.999828
Ykt6	-0.381402	0.96034	1.04735	0.999828
Yeats4	-0.162973	0.747634	1.1963	0.999828
Yeats2	-0.0550597	0.646186	1.22469	0.999828
Ybx1	-0.120688	0.717259	1.21672	0.999828
Yars	-0.220093	0.816407	1.16972	0.999828
Xylb	-0.395829	0.909319	1.10059	0.999828
Xrn1	0.116822	0.430488	1.18859	0.999828
Xrcc5	-0.4337	0.974165	1.03267	0.999828
Xrcc1	0.235926	0.347438	1.11935	0.999828
Xpo7	0.186552	0.388252	1.15036	0.999828
Xpo6	-0.0862354	0.651904	1.22105	0.999828
Xpo4	0.272823	0.402516	1.16386	0.999828
Xpo1	-0.0946788	0.676505	1.22255	0.999828
Xpnpep3	0.34534	0.308268	1.08157	0.999828
Xpnpep1	0.195412	0.373761	1.14884	0.999828
Xiap	0.138047	0.433918	1.18668	0.999828
Xab2	-0.113648	0.740866	1.20015	0.999828
Wrnip1	0.216862	0.387726	1.15236	0.999828
Wnk1	-0.367645	0.950483	1.05703	0.999828
Wipf2	0.034266	0.546909	1.22926	0.999828
Whsc1l1	0.205769	0.38373	1.1536	0.999828
Whsc1	-0.0359226	0.591957	1.21996	0.999828
Wdr92	-0.270107	0.901599	1.10993	0.999828
Wdr91	-0.0224885	0.578261	1.22418	0.999828
Wdr89	-0.244766	0.741528	1.1992	0.999828
Wdr81	-0.452224	0.98415	1.02327	0.999828
Wdr75	-0.250321	0.8782	1.13401	0.999828
Wdr62	-0.258559	0.7797	1.17506	0.999828
Wdr6	-0.239315	0.834856	1.1637	0.999828
Wdr46	-0.257815	0.86257	1.14783	0.999828
Wdr45	0.397724	0.291068	1.06948	0.999828
Wdr44	-0.283572	0.909796	1.10025	0.999828
Wdr43	-0.233825	0.792153	1.17294	0.999828
Wdr36	-0.277033	0.892597	1.12533	0.999828
Wdr3	0.0276982	0.55287	1.22732	0.999828
Wdr26	0.215069	0.380206	1.15385	0.999828
Wdr12	-0.132446	0.748198	1.19653	0.999828
Wdr11	0.00133458	0.634582	1.22612	0.999828
Wdr1	-0.313745	0.899788	1.11485	0.999828
Wdhd1	0.398834	0.365378	1.1426	0.999828
Wdfy1	-0.367011	0.885662	1.12946	0.999828
Wbp2	0.34984	0.282605	1.06421	0.999828
Wash1	-0.0455689	0.684394	1.22298	0.999828
Wars	-0.474617	0.989033	1.01514	0.999828
Wapal	0.200208	0.375857	1.14914	0.999828
Vta1	-0.134369	0.672774	1.21964	0.999828
Vrk1	0.0347334	0.509147	1.2136	0.999828
Vps52	-0.404067	0.968748	1.03648	0.999828
Vps4a	0.0207356	0.563443	1.22712	0.999828
Vps45	-0.204046	0.816402	1.17088	0.999828
Vps39	-0.320235	0.919522	1.09181	0.999828
Vps35	-0.192428	0.823811	1.16524	0.999828
Vps33a	-0.368411	0.96079	1.04506	0.999828
Vps29	-0.388339	0.946365	1.06438	0.999828
Vps26a	-0.16148	0.79701	1.17289	0.999828
Vps16	-0.265284	0.895135	1.12214	0.999828
Vps13d	0.118012	0.458324	1.19438	0.999828
Vps13c	-0.0804879	0.682123	1.22348	0.999828
Vps13a	-0.00156218	0.583896	1.2235	0.999828
Vma21	-0.19594	0.832091	1.16606	0.999828
Vkorc1l1	0.319369	0.353328	1.12572	0.999828
Vkorc1	-0.227552	0.850992	1.14728	0.999828
Vim	-0.324265	0.936144	1.07991	0.999828
Vdac3	-0.42185	0.971398	1.03546	0.999828
Vdac2	-0.527507	0.995022	1.01048	0.999828
Vdac1	-0.562816	0.9964	1.00832	0.999828
Vcpip1	-0.0882434	0.719284	1.213	0.999828
Vcp	-0.118079	0.719311	1.21234	0.999828
Vcl	-0.179628	0.788775	1.17216	0.999828
Vbp1	-0.250167	0.878425	1.1338	0.999828
Vav2	-0.417176	0.945224	1.06602	0.999828
Vat1	-0.323673	0.924773	1.08728	0.999828
Vars	-0.103934	0.673867	1.22085	0.999828
Vapb	-0.303842	0.902934	1.10778	0.999828
Vapa	-0.355848	0.948834	1.05847	0.999828
Vamp7	-0.0511802	0.577294	1.22846	0.999828
Utrn	-0.340011	0.923904	1.08848	0.999828
Utp20	-0.157714	0.722798	1.20971	0.999828
Utp15	-0.326624	0.938186	1.07493	0.999828
Usp9x	0.243421	0.341312	1.1184	0.999828
Usp47	-0.27086	0.887499	1.1288	0.999828
Usp24	-0.213252	0.824453	1.16443	0.999828
Usp22	-0.0309189	0.574025	1.23428	0.999828
Usp19	0.212741	0.36024	1.13393	0.999828
Usp15	-0.0104997	0.571948	1.23258	0.999828
Usp10	-0.306816	0.896051	1.11938	0.999828
Usp1	0.0890194	0.526476	1.22844	0.999828
Uso1	-0.323385	0.895947	1.12023	0.999828
Usmg5	-0.193036	0.802266	1.17045	0.999828
Uqcrc1	-0.146978	0.644766	1.22604	0.999828
Uqcc1	-0.172072	0.785745	1.1725	0.999828
Upf3b	-0.346553	0.943504	1.067	0.999828
Upf2	-0.07129	0.637345	1.22488	0.999828
Unk	-0.3413	0.948517	1.05853	0.999828
Ung	-0.121051	0.64725	1.22429	0.999828
Unc45a	-0.334262	0.92216	1.08955	0.999828
Umps	-0.405986	0.953087	1.05666	0.999828
Ugp2	-0.48392	0.991134	1.01332	0.999828
Uggt1	-0.124625	0.760382	1.18828	0.999828
Ufm1	-0.151959	0.764748	1.18162	0.999828
Ufd1l	0.102108	0.471484	1.20041	0.999828
Uckl1	-0.470257	0.957107	1.05381	0.999828
Uchl5	-0.148878	0.752768	1.19126	0.999828
Uchl3	-0.186078	0.790802	1.17275	0.999828
Uchl1	-0.347117	0.951637	1.05627	0.999828
Ubxn7	0.0923636	0.462637	1.20019	0.999828
Ubxn1	0.000734023	0.533501	1.22889	0.999828
Ubtf	0.219427	0.470422	1.19983	0.999828
Ubr5	0.323631	0.308797	1.08079	0.999828
Ubqln2	0.13459	0.471126	1.20056	0.999828
Ubqln1	-0.16157	0.719239	1.21364	0.999828
Ubp1	0.0721608	0.476481	1.19933	0.999828
Ublcp1	0.119715	0.447769	1.20508	0.999828
Ubfd1	0.218627	0.357487	1.12897	0.999828
Ube3c	0.00466511	0.554009	1.22795	0.999828
Ube3a	-0.268307	0.839101	1.15839	0.999828
Ube2v1	-0.113951	0.703209	1.22096	0.999828
Ube2t	-0.473627	0.985403	1.02162	0.999828
Ube2s	-0.182346	0.761597	1.18889	0.999828
Ube2r2	-0.297314	0.917492	1.09256	0.999828
Ube2q1	-0.399227	0.868612	1.14109	0.999828
Ube2o	-0.484923	0.938092	1.07568	0.999828
Ube2n	-0.201353	0.789121	1.17147	0.999828
Ube2m	-0.359153	0.947323	1.0609	0.999828
Ube2l3	-0.445522	0.954086	1.05695	0.999828
Ube2k	-0.0253328	0.580178	1.22284	0.999828
Ube2j1	-0.613108	0.997743	1.00543	0.999828
Ube2i	0.122357	0.446003	1.20258	0.999828
Ube2e1	-0.212054	0.728423	1.20372	0.999828
Ube2c	-0.0154261	0.623477	1.23028	0.999828
Ubap2l	-0.321853	0.934453	1.08186	0.999828
Uba6	-0.0209936	0.556466	1.22678	0.999828
Uba3	-0.107077	0.722953	1.20926	0.999828
Uba2	0.0887919	0.471717	1.19888	0.999828
Uba1y	-0.0129075	0.628692	1.22877	0.999828
Tyms	-0.142602	0.774967	1.17656	0.999828
Tyk2	-0.12199	0.692774	1.22578	0.999828
Txnrd1	0.39361	0.26274	1.02565	0.999828
Txnl4b	-0.208075	0.837111	1.16178	0.999828
Txnl1	0.0571963	0.494329	1.21658	0.999828
Txndc12	-0.329483	0.925511	1.08593	0.999828
Txlna	-0.171279	0.735934	1.20232	0.999828
Twf1	0.086641	0.495892	1.21316	0.999828
Tubgcp2	-0.162108	0.781097	1.17471	0.999828
Tubb5	-0.31566	0.914226	1.09639	0.999828
Tubb4a	-0.142408	0.768822	1.17842	0.999828
Tubb2b	0.0729334	0.478008	1.19898	0.999828
Tubb2a	-0.313381	0.895323	1.12139	0.999828
Tuba4a	-0.469814	0.962195	1.04265	0.999828
Tuba1a	-0.180919	0.764172	1.18264	0.999828
Ttll12	-0.0307602	0.610505	1.22827	0.999828
Ttc6	-0.354857	0.950946	1.05591	0.999828
Ttc5	0.298127	0.311817	1.08345	0.999828
Ttc38	-0.360772	0.904751	1.10623	0.999828
Ttc37	-0.147818	0.751874	1.19181	0.999828
Ttc27	-0.0592085	0.655301	1.22343	0.999828
Tsta3	-0.21986	0.687727	1.22438	0.999828
Tst	0.0529511	0.500133	1.21322	0.999828
Tsr1	0.0457989	0.488626	1.21083	0.999828
Tsn	-0.239992	0.780339	1.17418	0.999828
Tsg101	-0.376331	0.823912	1.16424	0.999828
Tsfm	0.23544	0.346319	1.12203	0.999828
Tsen34	0.00224406	0.577386	1.22684	0.999828
Tsc22d3	-0.240605	0.800204	1.1716	0.999828
Try5	0.0658759	0.463516	1.19815	0.999828
Try10	-0.377542	0.595474	1.2237	0.999828
Trrap	0.0778007	0.526522	1.22755	0.999828
Trps1	0.116032	0.465978	1.19378	0.999828
Trove2	-0.139654	0.751777	1.19232	0.999828
Trmu	0.309364	0.30561	1.08548	0.999828
Trmt6	0.0387689	0.535202	1.22594	0.999828
Trmt1l	0.221582	0.361763	1.135	0.999828
Trmt13	0.181896	0.468889	1.19698	0.999828
Trmt10c	-0.0846294	0.637231	1.2263	0.999828
Trip13	0.0509513	0.556673	1.2263	0.999828
Trim33	0.241136	0.347131	1.12213	0.999828
Trim27	0.0254499	0.504343	1.21524	0.999828
Trappc8	-0.0150889	0.611796	1.23	0.999828
Trappc5	-0.223683	0.837794	1.16105	0.999828
Trappc4	-0.326779	0.931129	1.08456	0.999828
Trappc3	-0.264657	0.892848	1.12368	0.999828
Trap1	-0.0117545	0.575831	1.22898	0.999828
Traf7	-0.0258963	0.624987	1.23072	0.999828
Traf3	-0.395669	0.938666	1.07335	0.999828
Tpt1	-0.298824	0.870708	1.13917	0.999828
Tpr	-0.108411	0.701599	1.22333	0.999828
Tpp2	0.173808	0.434592	1.18739	0.999828
Tpmt	-0.234286	0.872272	1.13656	0.999828
Tpm3	-0.280741	0.907543	1.10262	0.999828
Tpm2	-0.0816462	0.637159	1.22698	0.999828
Tpi1	-0.438299	0.979237	1.02857	0.999828
Tpd52l2	-0.290218	0.913381	1.0972	0.999828
Tpd52	-0.346825	0.94545	1.06544	0.999828
Tp53bp1	-0.442756	0.936051	1.08067	0.999828
Tp53	-0.47904	0.989757	1.01444	0.999828
Tor1aip2	0.437409	0.365824	1.14028	0.999828
Tor1a	0.0396226	0.514577	1.21947	0.999828
Top3b	0.374406	0.274622	1.04925	0.999828
Top2b	0.0599489	0.500537	1.21216	0.999828
Top1	0.261244	0.331535	1.09888	0.999828
Tomm70a	-0.0934442	0.682928	1.2234	0.999828
Tomm40	0.147315	0.41845	1.17681	0.999828
Tnpo3	0.173132	0.409803	1.17081	0.999828
Tnpo2	-0.338285	0.94525	1.06563	0.999828
Tnks1bp1	-0.274784	0.904121	1.10687	0.999828
Tmx3	-0.251234	0.811149	1.16859	0.999828
Tmprss13	-0.0600327	0.583043	1.2235	0.999828
Tmpo	-0.0980169	0.716995	1.21771	0.999828
Tmod3	0.0117685	0.535357	1.22532	0.999828
Tmod1	-0.279431	0.906683	1.10344	0.999828
Tmf1	0.0662278	0.488561	1.21172	0.999828
Tmem57	0.0441819	0.498533	1.21139	0.999828
Tmem263	-0.167033	0.763689	1.18444	0.999828
Tmem223	-0.0871591	0.653592	1.22182	0.999828
Tmem202	-0.284928	0.887878	1.12828	0.999828
Tmem185a	-0.404827	0.87869	1.13363	0.999828
Tmed9	-0.342627	0.92684	1.08572	0.999828
Tmed5	0.0217246	0.550464	1.22766	0.999828
Tmed4	-0.41399	0.933272	1.08223	0.999828
Tmed10	-0.466489	0.986681	1.01964	0.999828
Tmed1	-0.167148	0.803362	1.16908	0.999828
Tmco1	-0.381707	0.964888	1.03892	0.999828
Tma7	-0.386013	0.96804	1.03649	0.999828
Tln2	0.0917717	0.527479	1.22581	0.999828
Tln1	-0.108095	0.694149	1.22444	0.999828
Tlk2	0.147482	0.526979	1.22663	0.999828
Tle3	0.0216333	0.547649	1.22901	0.999828
Tle1	-0.0133131	0.54646	1.22921	0.999828
Tkt	0.184936	0.390271	1.14572	0.999828
Tjp1	0.30885	0.306304	1.0866	0.999828
Tjap1	0.215531	0.387896	1.15049	0.999828
Tiprl	-0.252837	0.881572	1.13277	0.999828
Timm8a2	0.142049	0.496016	1.21244	0.999828
Timm50	-0.306633	0.921748	1.09175	0.999828
Timm44	-0.460579	0.987891	1.01687	0.999828
Timm23	-0.0944749	0.671778	1.22014	0.999828
Timeless	0.2148	0.37291	1.14745	0.999828
Tiam1	0.296853	0.318237	1.08996	0.999828
Thumpd1	0.404055	0.259693	1.02207	0.999828
Thoc3	-0.000348414	0.578743	1.2234	0.999828
Thada	-0.103808	0.724281	1.20798	0.999828
Tgm1	-0.246039	0.877362	1.13395	0.999828
Tfb1m	0.0429428	0.508311	1.21362	0.999828
Tex10	0.122158	0.4531	1.19484	0.999828
Tes	-0.243155	0.870528	1.13997	0.999828
Terf2ip	0.206748	0.389861	1.14803	0.999828
Terf1	0.0836809	0.484337	1.20331	0.999828
Tecr	-0.501967	0.992396	1.01174	0.999828
Tead1	0.0908138	0.454318	1.19586	0.999828
Tdrd7	0.167897	0.4527	1.19598	0.999828
Tdp1	0.420697	0.266753	1.03013	0.999828
Tdg	0.270196	0.324362	1.09145	0.999828
Tcp1	-0.322735	0.902292	1.10888	0.999828
Tcf20	0.107353	0.498747	1.21088	0.999828
Tceb2	-0.316372	0.93326	1.08266	0.999828
Tbpl2	0.18935	0.38234	1.15303	0.999828
Tbl2	-0.371248	0.960743	1.0462	0.999828
Tbl1xr1	0.301109	0.306505	1.08598	0.999828
Tbcel	-0.195802	0.831526	1.16641	0.999828
Tbc1d9b	-0.115911	0.69621	1.22657	0.999828
Tbc1d7	-0.293639	0.915786	1.0937	0.999828
Tbc1d4	-0.685891	0.999351	1.00074	0.999828
Tbc1d32	-0.438423	0.978979	1.02905	0.999828
Tbc1d24	0.0130177	0.571732	1.23396	0.999828
Tbc1d15	-0.227775	0.846365	1.15457	0.999828
Tbc1d10b	-0.081501	0.718989	1.21393	0.999828
Tbc1d10a	-0.0143192	0.574538	1.23262	0.999828
Tatdn1	-0.222251	0.844731	1.15398	0.999828
Tarsl2	-0.709777	0.999666	1.00071	0.999828
Tars2	0.0388594	0.578116	1.22477	0.999828
Tars	-0.172336	0.797041	1.17174	0.999828
Taok3	-0.356558	0.950022	1.05774	0.999828
Taok2	-0.151582	0.633653	1.2268	0.999828
Tanc2	-0.19312	0.691927	1.22578	0.999828
Tanc1	-0.115222	0.694233	1.22384	0.999828
Taldo1	-0.0451064	0.628072	1.22923	0.999828
Tagln2	-0.255212	0.852652	1.1463	0.999828
Taf9b	0.104071	0.444039	1.20066	0.999828
Taf6	0.0544053	0.483685	1.20377	0.999828
Taf5	0.0767174	0.492406	1.21601	0.999828
Taf2	-0.197494	0.795564	1.17316	0.999828
Tada1	-0.232195	0.868528	1.14151	0.999828
Tab2	-0.111369	0.747299	1.19643	0.999828
Tab1	-0.43821	0.935226	1.08188	0.999828
Synj2bp	-0.144011	0.778045	1.17688	0.999828
Synj1	-0.0636624	0.698531	1.22766	0.999828
Syngr1	-0.0805539	0.71545	1.21868	0.999828
Syncrip	0.282128	0.317549	1.0902	0.999828
Syap1	-0.147651	0.721952	1.21111	0.999828
Supt4h1b	-0.240768	0.866047	1.14294	0.999828
Supt16h	0.220942	0.356194	1.1286	0.999828
Sumo2	0.0147451	0.576974	1.23051	0.999828
Stxbp5	0.0543766	0.58132	1.22166	0.999828
Stxbp2	0.0138743	0.623897	1.22942	0.999828
Stx5	-0.229411	0.86611	1.1425	0.999828
Stx3	-0.685214	0.980925	1.02548	0.999828
Stx18	-0.20029	0.823562	1.16546	0.999828
Stx12	-0.156948	0.73639	1.20034	0.999828
Stub1	-0.130573	0.742447	1.19866	0.999828
Stt3a	-0.363965	0.955155	1.05529	0.999828
Strn3	-0.301376	0.911873	1.09906	0.999828
Strn	-0.371369	0.961761	1.04336	0.999828
Strap	0.136748	0.448431	1.20236	0.999828
Stoml2	-0.116397	0.696569	1.22571	0.999828
Stmn1	-0.217726	0.818231	1.16768	0.999828
Stk4	-0.111178	0.727	1.20413	0.999828
Stk39	-0.0906564	0.650363	1.22214	0.999828
Stk38l	0.20511	0.368383	1.1433	0.999828
Stk35	0.361095	0.283362	1.06566	0.999828
Stk3	-0.137152	0.759602	1.18835	0.999828
Stip1	-0.196954	0.802838	1.17009	0.999828
Stim1	-0.207495	0.844458	1.15471	0.999828
Stau1	-0.174843	0.749685	1.19625	0.999828
Stat5a	-0.284144	0.803891	1.16808	0.999828
Stat2	-0.116371	0.663477	1.22439	0.999828
Stambp	-0.37232	0.946844	1.06284	0.999828
Stam2	-0.261155	0.85819	1.14998	0.999828
Stam	-0.0729707	0.6234	1.23097	0.999828
Stag2	0.129597	0.428282	1.1882	0.999828
St13	-0.286203	0.88427	1.12918	0.999828
Ssrp1	0.00933966	0.555958	1.2266	0.999828
Ssna1	-0.020587	0.614102	1.23034	0.999828
Ssbp1	-0.390103	0.850451	1.14979	0.999828
Srsf9	-0.218137	0.782992	1.17265	0.999828
Srr	-0.307621	0.888777	1.12594	0.999828
Srpr	-0.102899	0.671238	1.22147	0.999828
Srp72	-0.445111	0.950681	1.05684	0.999828
Srp68	-0.267324	0.898838	1.11512	0.999828
Srp54	-0.592214	0.991237	1.01307	0.999828
Srp14	-0.337621	0.925076	1.08675	0.999828
Sri	-0.272007	0.761739	1.18717	0.999828
Srgap2	-0.272052	0.900635	1.11207	0.999828
Srcap	-0.338861	0.906004	1.10495	0.999828
Srcap	-0.348165	0.947572	1.05912	0.999828
Src	0.284095	0.316747	1.09135	0.999828
Sptlc1	-0.35202	0.939761	1.07162	0.999828
Sptbn2	-0.31124	0.921992	1.09159	0.999828
Sptbn1	-0.134555	0.726617	1.20419	0.999828
Sptan1	-0.388012	0.957583	1.05232	0.999828
Spg20	0.387758	0.276434	1.0506	0.999828
Spen	-0.0343131	0.630025	1.2297	0.999828
Spcs3	-0.267517	0.89623	1.11815	0.999828
Spag9	-0.0980097	0.731676	1.20288	0.999828
Spag5	-0.442641	0.980042	1.02642	0.999828
Sod2	0.220939	0.367222	1.14093	0.999828
Sod1	0.271117	0.342017	1.11816	0.999828
Snx9	-0.244492	0.875445	1.13555	0.999828
Snx6	-0.377996	0.956293	1.05533	0.999828
Snx4	-0.342099	0.940699	1.06972	0.999828
Snx3	-0.199768	0.834959	1.16272	0.999828
Snx27	-0.323729	0.928365	1.08441	0.999828
Snx2	-0.142041	0.706106	1.22157	0.999828
Snx17	-0.0598348	0.663354	1.22495	0.999828
Snx14	-0.1578	0.775874	1.17669	0.999828
Snx12	0.00771704	0.625811	1.22982	0.999828
Snx1	-0.281654	0.866771	1.1418	0.999828
Sntb2	-0.212938	0.833354	1.16499	0.999828
Sntb1	-0.234332	0.808876	1.16941	0.999828
Snrpf	0.0833851	0.529792	1.22821	0.999828
Snf8	0.128606	0.466386	1.19377	0.999828
Snd1	-0.245572	0.837467	1.16115	0.999828
Snca	-0.463806	0.967593	1.0364	0.999828
Snap29	-0.465152	0.98076	1.02568	0.999828
Snap23	-0.319423	0.936057	1.08024	0.999828
Sms	-0.244338	0.844609	1.15437	0.999828
Smg9	0.272737	0.403097	1.16437	0.999828
Smg8	-0.119005	0.665476	1.22181	0.999828
Smg6	0.370021	0.269383	1.0375	0.999828
Smg5	0.125736	0.422866	1.1846	0.999828
Smg1	-0.291912	0.91429	1.096	0.999828
Smek2	0.180824	0.415926	1.17662	0.999828
Smek1	0.146038	0.438956	1.19364	0.999828
Smc6	0.416034	0.262899	1.02488	0.999828
Smc5	0.342216	0.286489	1.06215	0.999828
Smc3	-0.121389	0.67137	1.22017	0.999828
Smc2	-0.0113683	0.588513	1.21985	0.999828
Smc1a	0.143548	0.414817	1.17579	0.999828
Smarce1	0.228223	0.352064	1.12543	0.999828
Smarcd2	0.301806	0.311135	1.08239	0.999828
Smarcc2	0.27826	0.319752	1.08738	0.999828
Smarcb1	0.0787691	0.480053	1.20306	0.999828
Smarcad1	-0.0411607	0.587942	1.22219	0.999828
Smarca5	0.117615	0.45172	1.19779	0.999828
Smarca4	0.326244	0.296086	1.06881	0.999828
Smarca2	0.189211	0.39029	1.14461	0.999828
Smap1	-0.248236	0.84003	1.15801	0.999828
Smad3	0.191339	0.420743	1.18095	0.999828
Smad1	-0.244323	0.836948	1.16211	0.999828
Slmap	-0.125022	0.717312	1.21609	0.999828
Slc9a3r1	-0.110379	0.72549	1.20719	0.999828
Slc4a1ap	-0.107268	0.666909	1.22054	0.999828
Slc43a2	-0.413824	0.837438	1.16167	0.999828
Slc38a1	-0.0953812	0.70235	1.22168	0.999828
Slc30a9	-0.214554	0.850869	1.14819	0.999828
Slc30a6	-0.20161	0.818631	1.16768	0.999828
Slc2a1	0.279063	0.463064	1.19913	0.999828
Slc25a5	0.150105	0.414178	1.1763	0.999828
Slc25a33	-0.128145	0.684241	1.22347	0.999828
Slc25a3	0.13551	0.464779	1.19604	0.999828
Slc25a22	-0.439657	0.982865	1.02453	0.999828
Slc25a14	-0.25369	0.750449	1.19615	0.999828
Slc25a13	0.059735	0.475216	1.20035	0.999828
Slc25a11	-0.465632	0.988884	1.01535	0.999828
Slc12a2	-0.437119	0.957468	1.053	0.999828
Skp2	0.0734467	0.495219	1.21565	0.999828
Skp1	-0.100862	0.664817	1.22372	0.999828
Six1	-0.0799113	0.61435	1.22998	0.999828
Sin3b	0.10686	0.473248	1.19959	0.999828
Sin3a	0.298621	0.357923	1.1291	0.999828
Sigmar1	-0.00460409	0.529824	1.2273	0.999828
Shmt2	0.305967	0.307492	1.08149	0.999828
Shmt1	0.218684	0.355454	1.1275	0.999828
Shc1	-0.0742599	0.625514	1.23008	0.999828
Sh3glb2	0.359823	0.28356	1.06502	0.999828
Sh3glb1	-0.278393	0.882345	1.13124	0.999828
Sh3gl1	0.0988397	0.476812	1.19807	0.999828
Sh3bgrl	0.0232662	0.555329	1.22616	0.999828
Sgta	-0.0617779	0.651663	1.22219	0.999828
Sfxn1	-0.138263	0.762162	1.18719	0.999828
Setdb1	-0.246029	0.850186	1.14997	0.999828
Setd7	-0.266531	0.89452	1.12234	0.999828
Setd3	-0.179262	0.674514	1.22126	0.999828
Setd1a	0.333067	0.287382	1.06272	0.999828
Serpinh1	-0.0683268	0.62637	1.23008	0.999828
Serbp1	0.138351	0.429176	1.18611	0.999828
Sephs1	0.438542	0.264393	1.02377	0.999828
Senp3	-0.36975	0.911006	1.10032	0.999828
Selenbp1	-0.276065	0.881813	1.13207	0.999828
Sec63	-0.320936	0.901284	1.11049	0.999828
Sec62	-0.00503792	0.585978	1.22252	0.999828
Sec61b	-0.147397	0.770504	1.17786	0.999828
Sec61a1	-0.107979	0.74578	1.19799	0.999828
Sec24c	-0.300226	0.917744	1.09241	0.999828
Sec24b	0.175309	0.389651	1.14977	0.999828
Sec23a	-0.396616	0.967039	1.03735	0.999828
Sec22b	-0.268308	0.890887	1.12465	0.999828
Sec16a	0.00584347	0.587074	1.22127	0.999828
Sec13	-0.108592	0.723389	1.20719	0.999828
Sdhb	-0.312607	0.840032	1.15746	0.999828
Sdha	0.345386	0.284481	1.06293	0.999828
Sdf4	-0.596975	0.997591	1.00634	0.999828
Sdcbp	0.120103	0.517333	1.22198	0.999828
Sdad1	-0.0636848	0.60259	1.22867	0.999828
Scrn1	0.126056	0.442325	1.19715	0.999828
Scrib	-0.326168	0.940146	1.07036	0.999828
Scp2	-0.323438	0.936772	1.07804	0.999828
Scfd1	-0.0430316	0.625076	1.23006	0.999828
Scap	-0.407611	0.917125	1.09258	0.999828
Satb2	-0.1407	0.751013	1.19374	0.999828
Sars	0.111498	0.448777	1.20217	0.999828
Sarm1	-0.358373	0.950863	1.05664	0.999828
Sar1a	-0.318183	0.708035	1.21977	0.999828
Samm50	0.275368	0.388392	1.14841	0.999828
Sacm1l	-0.399214	0.96719	1.03713	0.999828
S100a4	-0.0373934	0.543167	1.2295	0.999828
S100a14	-0.290636	0.716448	1.2175	0.999828
S100a10	-0.181081	0.736631	1.20005	0.999828
Rxra	0.0816032	0.458987	1.19503	0.999828
Ruvbl2	0.143434	0.415146	1.17557	0.999828
Ruvbl1	0.273322	0.3235	1.0911	0.999828
Rtn3	-0.274951	0.900073	1.11425	0.999828
Rsu1	-0.0390913	0.586683	1.22134	0.999828
Rsf1	-0.614071	0.946271	1.06469	0.999828
Rrs1	-0.375549	0.939259	1.0719	0.999828
Rrp12	-0.0788325	0.684699	1.22201	0.999828
Rrbp1	-0.285371	0.877631	1.13379	0.999828
Rras2	-0.158207	0.745992	1.19767	0.999828
Rraga	0.0741472	0.527652	1.22523	0.999828
Rqcd1	-0.241522	0.87013	1.13997	0.999828
Rptor	-0.0408952	0.660109	1.22446	0.999828
Rpsa	-0.168383	0.713771	1.22015	0.999828
Rps9	0.408948	0.256621	1.01694	0.999828
Rps8	-0.138739	0.741966	1.19856	0.999828
Rps7	-0.563485	0.992801	1.01143	0.999828
Rps6kb1	0.243876	0.361841	1.134	0.999828
Rps6ka3	-0.296302	0.909001	1.1016	0.999828
Rps6ka1	0.0130397	0.558716	1.22798	0.999828
Rps6	0.478964	0.260369	1.02334	0.999828
Rps5	-0.0391431	0.596043	1.22312	0.999828
Rps4x	0.0294213	0.606598	1.229	0.999828
Rps3a	-0.457788	0.985476	1.02133	0.999828
Rps3	-0.415772	0.977749	1.03002	0.999828
Rps28	0.116824	0.454094	1.19636	0.999828
Rps27l	-0.299262	0.838843	1.15915	0.999828
Rps27a	-0.0984344	0.639019	1.22401	0.999828
Rps26	-0.745794	0.998013	1.0043	0.999828
Rps25	-0.535168	0.995962	1.00894	0.999828
Rps24	-0.293168	0.843598	1.15628	0.999828
Rps23	0.0938696	0.448097	1.20371	0.999828
Rps20	-0.399325	0.968297	1.03638	0.999828
Rps2	-0.341011	0.943189	1.06707	0.999828
Rps19	-0.40503	0.971674	1.03422	0.999828
Rps18	-0.471911	0.987556	1.01762	0.999828
Rps17	-0.472562	0.979477	1.02808	0.999828
Rps16	-0.247396	0.883232	1.13187	0.999828
Rps15a	-0.115165	0.751441	1.19244	0.999828
Rps15	-0.504696	0.958377	1.05038	0.999828
Rps14	-0.627728	0.989932	1.0139	0.999828
Rps13	-0.220592	0.848563	1.15265	0.999828
Rps12	-0.44534	0.974098	1.03298	0.999828
Rps11	-0.491076	0.988806	1.01636	0.999828
Rps10	-0.134901	0.764007	1.18365	0.999828
Rpn2	-0.186163	0.787405	1.17194	0.999828
Rpn1	-0.0447366	0.590987	1.2197	0.999828
Rplp2	-0.345029	0.940389	1.06979	0.999828
Rplp0	-0.279479	0.895208	1.12174	0.999828
Rpl9	-0.34489	0.929263	1.08414	0.999828
Rpl8	-0.663187	0.998445	1.00263	0.999828
Rpl7a	-0.392759	0.971433	1.03512	0.999828
Rpl7	0.236379	0.347317	1.12021	0.999828
Rpl5	-0.343265	0.872557	1.13539	0.999828
Rpl4	-0.27243	0.897625	1.11698	0.999828
Rpl38	-0.331901	0.926866	1.0853	0.999828
Rpl37a	-0.0580084	0.627118	1.22903	0.999828
Rpl36a	-0.623398	0.962281	1.04235	0.999828
Rpl35a	-0.403683	0.958849	1.0505	0.999828
Rpl35	-0.434179	0.982802	1.02484	0.999828
Rpl34	-0.382908	0.956471	1.05513	0.999828
Rpl32	-0.452434	0.918058	1.09188	0.999828
Rpl31	-0.375422	0.855941	1.14857	0.999828
Rpl30	-0.311971	0.927107	1.08515	0.999828
Rpl3	0.385039	0.370728	1.14563	0.999828
Rpl28	-0.196894	0.819053	1.16712	0.999828
Rpl27a	-0.286274	0.90612	1.10462	0.999828
Rpl27	-0.433862	0.970935	1.03574	0.999828
Rpl26	-0.470598	0.989639	1.01468	0.999828
Rpl24	-0.406229	0.974269	1.0324	0.999828
Rpl23a	-0.371891	0.963844	1.04052	0.999828
Rpl23	-0.172843	0.766645	1.17886	0.999828
Rpl22	-0.303468	0.882121	1.13146	0.999828
Rpl19	-0.057108	0.632958	1.2271	0.999828
Rpl18a	-0.421842	0.978509	1.02931	0.999828
Rpl18	-0.343942	0.935659	1.08195	0.999828
Rpl17	-0.105367	0.701989	1.22253	0.999828
Rpl15	-0.11641	0.740685	1.20121	0.999828
Rpl14	-0.411772	0.864844	1.14609	0.999828
Rpl13a	-0.134815	0.758271	1.19145	0.999828
Rpl12	0.114614	0.451802	1.1969	0.999828
Rpl11	-0.271617	0.888192	1.12768	0.999828
Rpl10a	-0.385038	0.962399	1.04209	0.999828
Rpl10	-0.0655887	0.678146	1.22168	0.999828
Rpf2	-0.526186	0.773546	1.17689	0.999828
Rpa3	0.0410003	0.571836	1.23326	0.999828
Rpa2	0.210718	0.384805	1.15321	0.999828
Rock2	-0.0204731	0.657981	1.22446	0.999828
Rock1	-0.206539	0.816664	1.16893	0.999828
Rnpep	-0.223759	0.80997	1.17041	0.999828
Rnf40	0.0551866	0.510303	1.21334	0.999828
Rnf20	0.29593	0.308644	1.08157	0.999828
Rnf2	0.0146728	0.526868	1.22737	0.999828
Rnf139	-0.393289	0.93666	1.07877	0.999828
Rmnd5a	-0.249179	0.885703	1.12901	0.999828
Rmnd1	-0.175725	0.810414	1.16987	0.999828
Rmdn3	-0.256436	0.89026	1.12435	0.999828
Rif1	0.101486	0.45082	1.20093	0.999828
Ric8a	-0.502795	0.993158	1.01108	0.999828
Rhob	-0.312929	0.803834	1.16859	0.999828
Rhoa	-0.332333	0.939884	1.07133	0.999828
Rgs10	-0.21556	0.781747	1.17323	0.999828
Rfc5	-0.114427	0.746845	1.19637	0.999828
Rfc3	-0.0513093	0.603428	1.22777	0.999828
Rfc1	0.314007	0.3128	1.08425	0.999828
Rexo4	-0.34224	0.945572	1.06516	0.999828
Retsat	-0.0228348	0.661637	1.2265	0.999828
Reps1	-0.193167	0.822975	1.16693	0.999828
Rel	-0.0776151	0.641296	1.22511	0.999828
Rdx	-0.337996	0.947346	1.06051	0.999828
Rdh13	0.143681	0.458138	1.19498	0.999828
Rdh10	-0.748656	0.941285	1.06954	0.999828
Rcor1	0.0580321	0.481312	1.20098	0.999828
Rcn1	-0.269185	0.900238	1.11254	0.999828
Rcl1	0.109277	0.451659	1.19873	0.999828
Rchy1	0.183691	0.382029	1.15573	0.999828
Rcc1	-0.0841841	0.700552	1.22522	0.999828
Rbms1	-0.262004	0.878798	1.13326	0.999828
Rbm4b	0.159488	0.507135	1.21586	0.999828
Rbm34	-0.44177	0.938106	1.07527	0.999828
Rbm28	-0.00201925	0.548049	1.22894	0.999828
Rbm12	0.402286	0.25502	1.01479	0.999828
Rbbp7	-0.0485815	0.620594	1.22796	0.999828
Rbbp5	0.369321	0.290591	1.06909	0.999828
Rbbp4	0.154661	0.406451	1.16936	0.999828
Rasal2	-0.344664	0.941656	1.0687	0.999828
Rasa1	-0.122167	0.620091	1.22865	0.999828
Rars	-0.205713	0.819571	1.16728	0.999828
Rap2a	-0.309698	0.906956	1.1033	0.999828
Rap1gds1	-0.487984	0.931641	1.08384	0.999828
Rap1b	-0.392828	0.964474	1.03925	0.999828
Rap1a	-0.474089	0.989998	1.0136	0.999828
Rangap1	-0.359055	0.957431	1.05336	0.999828
Ranbp9	-0.210636	0.833109	1.16522	0.999828
Ranbp6	-0.256878	0.877263	1.13433	0.999828
Ranbp2	-0.16142	0.753651	1.19004	0.999828
Ranbp1	-0.495902	0.97647	1.0317	0.999828
Ran	-0.133633	0.734084	1.20203	0.999828
Ralgps2	-0.361769	0.941714	1.06792	0.999828
Ralgapa1	-0.294043	0.888059	1.12801	0.999828
Ralbp1	-0.0317324	0.593239	1.22172	0.999828
Rala	-0.501087	0.992093	1.01215	0.999828
Rai14	-0.281612	0.905088	1.10571	0.999828
Rae1	-0.292346	0.863519	1.14803	0.999828
Rad54l2	0.165695	0.393926	1.14942	0.999828
Rad50	-0.0439319	0.604338	1.22702	0.999828
Rad23b	0.33557	0.286157	1.06504	0.999828
Rad23a	0.0873817	0.537421	1.22614	0.999828
Racgap1	0.203416	0.369572	1.14329	0.999828
Rac1	-0.400183	0.970477	1.03602	0.999828
Rabl3	-0.24792	0.779152	1.17609	0.999828
Rabggta	-0.0290467	0.651311	1.22232	0.999828
Rabgef1	-0.253351	0.847593	1.15297	0.999828
Rabgap1l	-0.132202	0.663171	1.2254	0.999828
Rab8a	0.182269	0.387887	1.15165	0.999828
Rab7a	-0.445131	0.979177	1.02889	0.999828
Rab5a	-0.277659	0.901063	1.11069	0.999828
Rab4a	-0.153269	0.785225	1.17294	0.999828
Rab3ip	-0.0940425	0.702749	1.2209	0.999828
Rab3gap2	-0.191654	0.802309	1.16992	0.999828
Rab3gap1	-0.0943097	0.668992	1.22048	0.999828
Rab3d	0.0511321	0.537153	1.22747	0.999828
Rab33b	-0.289036	0.888721	1.12637	0.999828
Rab31	-0.358531	0.957609	1.05194	0.999828
Rab29	-0.311829	0.923155	1.08849	0.999828
Rab21	-0.485241	0.990676	1.01394	0.999828
Rab1b	-0.659536	0.972193	1.03401	0.999828
Rab1A	-0.332663	0.944098	1.06642	0.999828
Rab18	-0.00355124	0.560137	1.22829	0.999828
Rab14	-0.285729	0.910021	1.10005	0.999828
Rab11fip2	-0.0999885	0.735798	1.20278	0.999828
Rab11a	-0.454517	0.986609	1.01993	0.999828
Rab10	-0.205564	0.84181	1.15658	0.999828
Qtrt1	0.058772	0.496518	1.21263	0.999828
Qser1	0.19422	0.391353	1.14539	0.999828
Qrsl1	-0.180468	0.80483	1.16885	0.999828
Qrich1	0.300185	0.303728	1.08415	0.999828
Qki	0.109962	0.451319	1.20115	0.999828
Qdpr	-0.427281	0.93826	1.07459	0.999828
Pygl	-0.201495	0.779998	1.17428	0.999828
Pygb	-0.0716645	0.641402	1.22449	0.999828
Pxn	-0.214938	0.851632	1.14654	0.999828
Pwp2	-0.23142	0.838537	1.15928	0.999828
Pus7	0.203724	0.365482	1.14168	0.999828
Pum1	0.0251393	0.542273	1.22941	0.999828
Ptprk	-0.165288	0.800996	1.17156	0.999828
Ptprd	-0.407753	0.975239	1.03153	0.999828
Ptpra	0.379028	0.282488	1.06516	0.999828
Ptpn23	-0.189946	0.797023	1.17231	0.999828
Ptpn13	-0.231329	0.789986	1.17215	0.999828
Ptpn12	-0.213576	0.826956	1.16568	0.999828
Ptpn11	-0.359691	0.93358	1.08216	0.999828
ptplad1	-0.230001	0.861157	1.14701	0.999828
Ptp4a2	-0.352908	0.897867	1.1168	0.999828
Ptk7	-0.186177	0.820558	1.16695	0.999828
Ptges3	-0.437357	0.980535	1.02582	0.999828
Ptges2	-0.513375	0.973913	1.03355	0.999828
Ptar1	0.313515	0.36568	1.14106	0.999828
Psmg3	0.309178	0.307345	1.08362	0.999828
Psme4	0.23992	0.341511	1.11778	0.999828
Psme3	0.263422	0.328986	1.09675	0.999828
Psme2	-0.156165	0.773323	1.17717	0.999828
Psme1	-0.281452	0.876881	1.13435	0.999828
Psmd8	0.00252743	0.521185	1.22906	0.999828
Psmd7	-0.599698	0.997258	1.00706	0.999828
Psmd6	-0.228134	0.863744	1.14621	0.999828
Psmd4	-0.262236	0.83781	1.16051	0.999828
Psmd3	-0.0581602	0.676931	1.22255	0.999828
Psmd2	-0.503418	0.9872	1.01798	0.999828
Psmd14	-0.151892	0.771949	1.17632	0.999828
Psmd13	-0.0202248	0.628239	1.22872	0.999828
Psmd12	0.526089	0.260467	1.02233	0.999828
Psmd11	-0.107547	0.692802	1.22507	0.999828
Psmd1	-0.180357	0.811054	1.16904	0.999828
Psmc6	-0.508949	0.94963	1.05813	0.999828
Psmc5	-0.242751	0.868315	1.14175	0.999828
Psmc4	-0.246867	0.784734	1.17343	0.999828
Psmc3	-0.347943	0.946548	1.06376	0.999828
Psmc2	-0.447076	0.938283	1.07376	0.999828
Psmc1	-0.400307	0.960119	1.0479	0.999828
Psmb6	-0.383952	0.96735	1.03691	0.999828
Psmb5	-0.356089	0.954765	1.05608	0.999828
Psmb4	-0.0901279	0.691274	1.22614	0.999828
Psmb3	-0.318923	0.850642	1.14897	0.999828
Psmb1	-0.207661	0.834886	1.16318	0.999828
Psma7	-0.307776	0.92208	1.0908	0.999828
Psma6	-0.174306	0.768598	1.17934	0.999828
Psma5	0.0308168	0.547332	1.22925	0.999828
Psma4	-0.013018	0.549602	1.22955	0.999828
Psma3	-0.186505	0.76602	1.17915	0.999828
Psma2	-0.153801	0.715593	1.2182	0.999828
Psma1	-0.238612	0.840177	1.15655	0.999828
Psip1	-0.239695	0.767473	1.17824	0.999828
Psat1	-0.344467	0.946937	1.06212	0.999828
Prrc2c	-0.53945	0.98298	1.02391	0.999828
Prrc2b	-0.21336	0.845732	1.1548	0.999828
Prrc2a	-0.260929	0.824755	1.16429	0.999828
Prpsap1	-0.515374	0.99156	1.01196	0.999828
Prps1	-0.280293	0.906532	1.10466	0.999828
Prmt5	-0.373949	0.947747	1.0589	0.999828
Prkra	-0.300838	0.923966	1.08766	0.999828
Prkdc	-0.441238	0.981244	1.02507	0.999828
Prkcz	-0.439835	0.978139	1.03005	0.999828
Prkcsh	-0.567289	0.997376	1.00647	0.999828
Prkcd	-0.121467	0.739733	1.20102	0.999828
Prkca	-0.349018	0.900132	1.11384	0.999828
Prkar2b	-0.395806	0.971544	1.03485	0.999828
Prkar2a	-0.401349	0.965745	1.03867	0.999828
Prkar1a	-0.256651	0.857961	1.15021	0.999828
Prkag1	-0.466153	0.988523	1.01643	0.999828
Prkaca	-0.418442	0.96561	1.03892	0.999828
Prkaa2	0.285033	0.405691	1.16834	0.999828
Prepl	-0.144983	0.701827	1.22299	0.999828
Prep	0.283113	0.318261	1.08875	0.999828
Prelid1	-0.265884	0.895971	1.11977	0.999828
Prdx5	-0.366551	0.957651	1.05159	0.999828
Prdx4	-0.55133	0.995938	1.00927	0.999828
Prdx1	0.0231889	0.543559	1.22942	0.999828
Pqbp1	-0.0569172	0.57761	1.22641	0.999828
Ppp6c	0.224279	0.354678	1.12752	0.999828
Ppp5c	-0.145677	0.730933	1.20303	0.999828
Ppp4c	0.309209	0.382136	1.15363	0.999828
Ppp3cb	0.279203	0.333918	1.10423	0.999828
Ppp2r5d	0.122176	0.427103	1.18722	0.999828
Ppp2r5c	0.120327	0.492114	1.21633	0.999828
Ppp2r2a	-0.0522165	0.608153	1.22869	0.999828
Ppp2r1b	-0.210124	0.759907	1.18818	0.999828
Ppp2r1a	-0.110998	0.718689	1.21485	0.999828
Ppp1r21	0.181966	0.381409	1.15507	0.999828
Ppp1r12a	-0.0285666	0.581073	1.22204	0.999828
Ppp1cb	-0.137333	0.765524	1.18029	0.999828
Ppp1ca	0.28707	0.317145	1.09142	0.999828
Ppme1	-0.104078	0.736029	1.20179	0.999828
Ppm1f	-0.522554	0.922253	1.08921	0.999828
Ppip5k2	0.177273	0.395682	1.1522	0.999828
Ppih	0.360883	0.275828	1.05107	0.999828
Ppif	0.123941	0.428923	1.18769	0.999828
Ppic	-0.325362	0.940346	1.07016	0.999828
Ppib	-0.0705508	0.687069	1.22396	0.999828
Ppia	0.334852	0.293025	1.06848	0.999828
Ppfibp1	-0.331999	0.860943	1.14726	0.999828
Ppat	-0.125342	0.702326	1.22238	0.999828
Ppa1	-0.0824688	0.652274	1.22015	0.999828
Pou2f1	-0.359013	0.922962	1.08916	0.999828
Pot1	0.235365	0.374181	1.1489	0.999828
Por	-0.241331	0.847428	1.15438	0.999828
Pomgnt2	-0.212204	0.847617	1.15245	0.999828
Polr3f	-0.311242	0.927485	1.0847	0.999828
Polr3e	-0.146323	0.721653	1.21132	0.999828
Polr3c	0.242477	0.342603	1.11881	0.999828
Polr3b	0.0120097	0.626533	1.22956	0.999828
Polr3a	-0.0574875	0.658043	1.22378	0.999828
Polr2h	0.0343942	0.515524	1.22071	0.999828
Polr2e	0.219796	0.368867	1.14233	0.999828
Polr1c	-0.120836	0.740296	1.20126	0.999828
Polr1b	0.0115594	0.539273	1.22647	0.999828
Polr1a	-0.136831	0.750823	1.19542	0.999828
Poldip2	0.417555	0.252965	1.01081	0.999828
Pold2	0.494003	0.251903	1.00796	0.999828
Pold1	0.403598	0.271548	1.04166	0.999828
Polb	0.294057	0.339636	1.11545	0.999828
Poglut1	0.00963425	0.525737	1.22871	0.999828
Pnpla2	-0.171815	0.807763	1.16957	0.999828
Pms1	-0.328529	0.905006	1.10608	0.999828
Pmpcb	0.29191	0.313264	1.08455	0.999828
Pmm2	-0.103863	0.71575	1.21775	0.999828
Pm20d2	-0.556002	0.99664	1.00785	0.999828
Plxna1	-0.262694	0.829327	1.16674	0.999828
Pls3	-0.298864	0.921454	1.09186	0.999828
Pls1	-0.332009	0.894275	1.12351	0.999828
Plod3	-0.0318727	0.610383	1.22888	0.999828
Plod2	-0.422188	0.959309	1.0498	0.999828
Plod1	-0.227747	0.748714	1.19669	0.999828
Plin2	-0.096017	0.667386	1.21987	0.999828
Plekha7	0.14543	0.465771	1.19432	0.999828
Plekha5	-0.556561	0.987168	1.01832	0.999828
Plekha1	-0.115526	0.649923	1.22291	0.999828
Plec	-0.212259	0.795944	1.17312	0.999828
Plch1	-0.65654	0.999344	1.00108	0.999828
Plcg1	-0.0965646	0.732871	1.20278	0.999828
Plcb3	-0.454848	0.963123	1.0413	0.999828
Pkp2	-0.187407	0.71271	1.21979	0.999828
Pkn2	-0.119014	0.732985	1.20228	0.999828
Pkn1	-0.204881	0.808792	1.16988	0.999828
Pkm	-0.0186069	0.603294	1.22836	0.999828
Pitpnb	0.122163	0.471783	1.19799	0.999828
Pip5k1a	-0.169976	0.753215	1.19066	0.999828
Pip4k2a	-0.179186	0.706387	1.22132	0.999828
Pik3r4	0.038194	0.539223	1.22733	0.999828
Pik3r1	0.143007	0.423193	1.18436	0.999828
Pik3c3	0.0720371	0.537318	1.22688	0.999828
Pik3c2a	-0.591959	0.989053	1.01444	0.999828
Pik3ap1	-0.206931	0.842944	1.15648	0.999828
Pigt	-0.0983953	0.672659	1.2202	0.999828
Pick1	-0.23552	0.840047	1.15692	0.999828
Picalm	-0.107411	0.68462	1.22263	0.999828
Pi4kb	-0.349025	0.952022	1.05629	0.999828
Pi4ka	0.223181	0.35638	1.12795	0.999828
Pi4k2a	-0.234459	0.844391	1.15571	0.999828
Phkg2	-0.211416	0.828014	1.16603	0.999828
Phka2	-0.0665771	0.681634	1.22337	0.999828
Phka1	-0.117337	0.669144	1.21998	0.999828
Phgdh	-0.321464	0.931576	1.0842	0.999828
Phf6	-0.220535	0.807231	1.16939	0.999828
Phf21a	0.168814	0.435538	1.18659	0.999828
Phf2	-0.147531	0.783319	1.17253	0.999828
Phf13	0.176333	0.408306	1.17118	0.999828
Phb2	-0.403207	0.971117	1.03555	0.999828
Phb	-0.22285	0.857902	1.15067	0.999828
Pgrmc1	-0.517977	0.994209	1.01108	0.999828
Pgp	-0.128804	0.717184	1.21731	0.999828
Pgm3	-0.189053	0.755921	1.18971	0.999828
Pgm1	-0.0557226	0.612013	1.22958	0.999828
Pgk2	-0.306708	0.928228	1.08469	0.999828
Pgk1	0.268255	0.328773	1.09731	0.999828
Pgd	0.298109	0.331442	1.10111	0.999828
Pgam1	-0.244458	0.860452	1.14927	0.999828
Pfn2	-0.315518	0.915182	1.09388	0.999828
Pfkm	-0.393059	0.961495	1.04464	0.999828
Pfkl	0.271926	0.322126	1.0903	0.999828
Pfdn6	-0.160935	0.76345	1.18471	0.999828
Pfdn5	-0.319392	0.933742	1.08191	0.999828
Pfdn2	-0.245354	0.804993	1.1685	0.999828
Pfdn1	0.13479	0.468267	1.19645	0.999828
Pfas	0.201961	0.487845	1.21098	0.999828
Pex5	-0.167996	0.768912	1.17793	0.999828
Pex19	-0.530194	0.988856	1.01605	0.999828
Peo1	0.340599	0.284336	1.06515	0.999828
Pelp1	-0.116703	0.658568	1.22318	0.999828
Pebp1	0.376418	0.273888	1.04784	0.999828
Pdxp	-0.232053	0.827616	1.16604	0.999828
Pds5b	-0.189879	0.761441	1.18929	0.999828
Pdpk1	-0.278203	0.866591	1.14209	0.999828
Pdlim7	-0.0423885	0.623632	1.22974	0.999828
Pdlim1	-0.263088	0.890064	1.1246	0.999828
Pdia6	-0.251214	0.855489	1.1485	0.999828
Pdia4	-0.481539	0.988435	1.01671	0.999828
Pdia3	-0.332319	0.937815	1.07665	0.999828
Pdhx	-0.179749	0.763043	1.18663	0.999828
Pdhb	0.385996	0.269932	1.03823	0.999828
Pdha1	0.118882	0.464815	1.19506	0.999828
Pde8a	-0.0118699	0.632226	1.22651	0.999828
Pde12	-0.0772279	0.638104	1.2247	0.999828
Pdcl	0.139326	0.413657	1.17714	0.999828
Pdcd6ip	-0.482935	0.984507	1.02291	0.999828
Pdcd4	-0.170053	0.678267	1.22113	0.999828
Pdcd11	-0.350916	0.924609	1.08798	0.999828
Pdap1	0.175841	0.389837	1.14914	0.999828
Pcyt1a	0.279994	0.320059	1.08586	0.999828
Pcyox1l	-0.190192	0.822991	1.16638	0.999828
Pcnt	-0.0844513	0.644083	1.22555	0.999828
Pcna	-0.176439	0.776552	1.17648	0.999828
Pcmt1	-0.252678	0.882064	1.13189	0.999828
Pcm1	-0.0971192	0.674574	1.2206	0.999828
Pck1	-0.269012	0.834527	1.16381	0.999828
Pcbp2	0.248729	0.338316	1.11621	0.999828
Pcbd1	0.00120809	0.616124	1.23182	0.999828
Pbrm1	-0.116678	0.70785	1.22091	0.999828
Patl1	-0.349036	0.947396	1.06016	0.999828
Parva	-0.185722	0.797437	1.17172	0.999828
Parpbp	-0.21766	0.847485	1.15391	0.999828
Parp1	0.082482	0.49815	1.2125	0.999828
Park7	-0.35813	0.95669	1.05456	0.999828
Pard3	-0.0503082	0.671318	1.22085	0.999828
Pank4	-0.239998	0.865912	1.14382	0.999828
Palld	0.0461149	0.525847	1.22797	0.999828
Pald1	0.00316382	0.630463	1.22889	0.999828
Pak4	0.0119451	0.577011	1.22876	0.999828
Pak2	0.169185	0.392793	1.14844	0.999828
Pak1	-0.203893	0.816573	1.16938	0.999828
Paip1	-0.146264	0.782044	1.17307	0.999828
Paics	-0.138421	0.699343	1.22609	0.999828
Pafah1b1	-0.117051	0.70924	1.21893	0.999828
Pacsin2	-0.25028	0.798401	1.17134	0.999828
Pabpc4	-0.297256	0.90698	1.10287	0.999828
Pabpc1	-0.147488	0.751049	1.19313	0.999828
Pa2g4	-0.357621	0.956489	1.05474	0.999828
P4hb	-0.342846	0.94922	1.05849	0.999828
Oxsr1	-0.358254	0.901843	1.1088	0.999828
Oxr1	-0.0228401	0.561553	1.22579	0.999828
Oxct1	0.100025	0.463819	1.19678	0.999828
Otud6a	-0.0654205	0.703262	1.22032	0.999828
Otud4	0.00233335	0.562016	1.22587	0.999828
Otub1	0.0573783	0.593312	1.221	0.999828
Osgep	-0.100294	0.668296	1.21998	0.999828
Osbpl9	-0.125952	0.726047	1.20533	0.999828
Osbpl3	-0.24234	0.859796	1.14999	0.999828
Osbpl10	0.0379685	0.510301	1.21434	0.999828
Osbp	-0.611697	0.998732	1.00257	0.999828
Orc5	-0.0552843	0.681147	1.22402	0.999828
Oma1	-0.180877	0.816407	1.1703	0.999828
Ola1	-0.310661	0.929941	1.08449	0.999828
Odf2	-0.125142	0.76233	1.18681	0.999828
Obsl1	-0.0112908	0.619709	1.23044	0.999828
Oat	-0.137823	0.703706	1.21962	0.999828
Nvl	0.263083	0.328496	1.09766	0.999828
Nutf2	-0.135245	0.743815	1.19953	0.999828
Nupl1	-0.307602	0.888522	1.12661	0.999828
Nup98	-0.234406	0.825736	1.16453	0.999828
Nup93	-0.166659	0.801126	1.17116	0.999828
Nup88	-0.415692	0.972552	1.03401	0.999828
Nup62	0.0759331	0.495381	1.21501	0.999828
Nup54	-0.0787541	0.714377	1.21974	0.999828
Nup50	0.18975	0.378546	1.15246	0.999828
Nup37	-0.335057	0.939635	1.0719	0.999828
Nup35	-0.0326859	0.601256	1.22769	0.999828
Nup214	-0.312744	0.931798	1.08358	0.999828
Nup210	-0.25042	0.859264	1.14982	0.999828
Nup205	-0.392934	0.916834	1.09404	0.999828
Nup188	0.0771511	0.580842	1.22334	0.999828
Nup155	-0.215507	0.852276	1.14633	0.999828
Nup153	-0.249618	0.863586	1.14759	0.999828
Nup107	-0.155779	0.736065	1.20117	0.999828
Nudt5	-0.260091	0.774682	1.17737	0.999828
Nudc	-0.0471113	0.648985	1.22354	0.999828
Nucb1	-0.29398	0.907409	1.10292	0.999828
Ntpcr	-0.285677	0.889228	1.12503	0.999828
Nt5c3a	0.0644185	0.559627	1.22904	0.999828
Nt5c2	-0.00419364	0.573582	1.23425	0.999828
Nsun2	0.373617	0.272744	1.04485	0.999828
Nsf	-0.0833771	0.701197	1.22412	0.999828
Nsdhl	-0.378217	0.96143	1.04497	0.999828
Nsd1	0.482336	0.365868	1.13918	0.999828
Nsa2	-0.298469	0.92121	1.09247	0.999828
Nrf1	-0.00560734	0.583408	1.22337	0.999828
Nrd1	-0.0243079	0.578422	1.22362	0.999828
Nrbf2	0.235933	0.351047	1.12343	0.999828
Nras	-0.506865	0.993892	1.01111	0.999828
Npm1	-0.388815	0.969263	1.03626	0.999828
Nploc4	0.166085	0.396918	1.15347	0.999828
Npepps	-0.289582	0.913212	1.09837	0.999828
Notch1	-0.0912911	0.725591	1.20666	0.999828
Nop58	0.0106822	0.531553	1.22735	0.999828
Nop56	-0.273009	0.886407	1.1289	0.999828
Nop2	-0.279349	0.900685	1.11166	0.999828
Nop14	-0.385688	0.923954	1.08809	0.999828
Nomo1	-0.476688	0.987364	1.01779	0.999828
Nol10	-0.52453	0.985573	1.0207	0.999828
Noc2l	-0.262848	0.895673	1.12086	0.999828
Nnt	-0.138006	0.745277	1.1992	0.999828
Nmt1	-0.410715	0.947271	1.06167	0.999828
Nmnat1	-0.0544441	0.619697	1.23126	0.999828
Nme3	-0.00044614	0.613805	1.2306	0.999828
Nme1	-0.232599	0.83629	1.16232	0.999828
Nmd3	0.127485	0.425799	1.18819	0.999828
Nlrx1	-0.384735	0.913462	1.09638	0.999828
Nkap	0.327669	0.294671	1.06637	0.999828
Nipbl	-0.382507	0.966722	1.03817	0.999828
Nip7	-0.67256	0.999112	1.0019	0.999828
Nhp2l1	0.175033	0.387606	1.1532	0.999828
Nfyb	0.223859	0.454983	1.19542	0.999828
Nfs1	0.160993	0.409492	1.17108	0.999828
Nfrkb	0.231614	0.366922	1.14123	0.999828
Nfic	-0.381551	0.896084	1.11894	0.999828
Nfatc1	-0.25383	0.87511	1.13563	0.999828
Nf2	-0.255881	0.871503	1.13865	0.999828
Nenf	-0.292717	0.879428	1.13356	0.999828
Nemf	-0.223423	0.850895	1.14769	0.999828
Nelfe	0.183142	0.391079	1.14576	0.999828
Nelfcd	0.398586	0.256329	1.01718	0.999828
Nelfb	-0.00539375	0.561051	1.22749	0.999828
Nek9	-0.447481	0.984963	1.02227	0.999828
Nek6	-0.144488	0.75833	1.19024	0.999828
Nek3	0.037163	0.552673	1.22783	0.999828
Nefm	-0.437333	0.983442	1.02365	0.999828
Nefl	-0.4362	0.982901	1.0242	0.999828
Nedd4l	-0.718627	0.997051	1.0072	0.999828
Ndufv1	0.188353	0.376507	1.14868	0.999828
Ndufs8	-0.0470935	0.607883	1.22901	0.999828
Ndufs7	-0.226578	0.806404	1.16878	0.999828
Ndufs4	0.0983996	0.456305	1.19344	0.999828
Ndufs1	0.402433	0.256793	1.01622	0.999828
Ndufaf7	0.146591	0.497395	1.21272	0.999828
Ndufa6	-0.219382	0.832389	1.16591	0.999828
Ndufa4	-0.173662	0.743848	1.19891	0.999828
Ndufa12	-0.416101	0.973648	1.03403	0.999828
Ndrg2	-0.0274569	0.617216	1.23229	0.999828
Ndrg1	-0.166352	0.798685	1.17116	0.999828
Ndnl2	0.202536	0.412326	1.17568	0.999828
Ncs1	-0.162487	0.770631	1.17743	0.999828
Ncoa2	0.179177	0.385131	1.15179	0.999828
Nckap1	-0.0776873	0.644935	1.22474	0.999828
Nck1	0.157771	0.428774	1.18842	0.999828
Ncapg	0.361848	0.276989	1.04855	0.999828
Ncapd2	0.34432	0.282389	1.06619	0.999828
Nav1	-0.164416	0.781686	1.17375	0.999828
Nat10	-0.254867	0.889061	1.12531	0.999828
Nasp	-0.266208	0.893263	1.12371	0.999828
Nars	-0.121234	0.700543	1.22595	0.999828
Napa	-0.556735	0.822892	1.16739	0.999828
Nap1l1	-0.485063	0.991073	1.01362	0.999828
Nans	-0.158705	0.765532	1.17966	0.999828
Nampt	-0.293258	0.908551	1.10245	0.999828
Nagk	-0.0117507	0.649936	1.22213	0.999828
Nae1	-0.169579	0.759181	1.18834	0.999828
Naca	-0.292211	0.912907	1.09847	0.999828
Naa50	-0.198298	0.755446	1.18961	0.999828
Naa35	-0.0818922	0.646927	1.22448	0.999828
Naa20	-0.188242	0.823864	1.16474	0.999828
Naa16	-0.322323	0.922113	1.08994	0.999828
Naa15	-0.368858	0.957491	1.05262	0.999828
Naa10	-0.447171	0.89642	1.1179	0.999828
Myo9b	-0.0641112	0.617812	1.23177	0.999828
Myo9a	-0.18202	0.771121	1.17631	0.999828
Myo5a	0.0975785	0.447585	1.20571	0.999828
Myo1e	-0.374638	0.901054	1.11116	0.999828
Myo1d	-0.557062	0.996378	1.00865	0.999828
Myo1c	0.0932173	0.462878	1.19973	0.999828
Myo1b	-0.368911	0.954897	1.05541	0.999828
Myl6b	-0.296587	0.918357	1.09178	0.999828
Myl6	0.0662599	0.505575	1.21414	0.999828
Myh9	-0.0612689	0.639795	1.22305	0.999828
Myh10	-0.338548	0.937798	1.07706	0.999828
Mycbp2	0.0489408	0.504837	1.21541	0.999828
Mycbp	-0.53627	0.976634	1.03111	0.999828
Mut	0.332394	0.288062	1.06251	0.999828
Mtx2	-0.302502	0.909086	1.10124	0.999828
Mtr	-0.347984	0.932745	1.0825	0.999828
Mtmr1	-0.322855	0.93196	1.0829	0.999828
Mthfd1	-0.00926016	0.585539	1.22338	0.999828
Mtf2	0.212263	0.371016	1.14529	0.999828
Mtdh	-0.242649	0.841201	1.15741	0.999828
Mtap	0.325202	0.306958	1.08358	0.999828
Mta2	0.115187	0.454389	1.19495	0.999828
Mta1	-0.184432	0.734286	1.20167	0.999828
Msto1	0.315879	0.296721	1.06976	0.999828
Mst4	-0.283229	0.896116	1.11849	0.999828
Msn	-0.358845	0.936664	1.07834	0.999828
Msi2	0.253592	0.338938	1.11443	0.999828
Msi1	0.113009	0.474064	1.19954	0.999828
Msh3	-0.106883	0.715032	1.21941	0.999828
Mrto4	-0.111472	0.727076	1.20357	0.999828
Mrps9	-0.39562	0.945134	1.06633	0.999828
Mrps35	0.119048	0.433186	1.18693	0.999828
Mrps27	0.112979	0.435564	1.18554	0.999828
Mrps23	0.080675	0.522621	1.22741	0.999828
Mrps17	-0.640069	0.997756	1.00509	0.999828
Mrps16	-0.0956108	0.666213	1.22082	0.999828
Mrpl9	0.0488331	0.577299	1.22756	0.999828
Mrpl57	-0.0241432	0.639173	1.22349	0.999828
Mrpl53	-0.13036	0.763356	1.1852	0.999828
Mrpl50	0.0263184	0.576997	1.22964	0.999828
Mrpl49	-0.150441	0.730867	1.2043	0.999828
Mrpl43	0.367545	0.310192	1.08041	0.999828
Mrpl41	0.0764277	0.461539	1.19842	0.999828
Mrpl39	-0.0776864	0.706549	1.22087	0.999828
Mrpl34	-0.151127	0.726402	1.20453	0.999828
Mrpl28	-0.443005	0.955401	1.05516	0.999828
Mrpl27	-0.259081	0.677494	1.22204	0.999828
Mrpl24	0.334857	0.28656	1.06105	0.999828
Mrpl22	-0.00595143	0.620074	1.22946	0.999828
Mrpl21	-0.029464	0.664386	1.22528	0.999828
Mrpl2	-0.0923661	0.690466	1.22622	0.999828
Mrpl17	-0.3031	0.895812	1.12054	0.999828
Mrpl16	-0.189487	0.777306	1.17639	0.999828
Mrpl15	0.347674	0.284079	1.06557	0.999828
Mrpl12	-0.788296	0.999828	0.999828	0.999828
Mrpl11	-0.4862	0.980046	1.02605	0.999828
Mrpl1	0.260672	0.332018	1.09921	0.999828
Mre11a	0.12542	0.452744	1.19499	0.999828
Mprip	-0.0549067	0.639619	1.22353	0.999828
Mpp6	0.0039458	0.589349	1.21895	0.999828
Mpp2	-0.0515128	0.599925	1.22671	0.999828
Mphosph6	0.394455	0.261777	1.02467	0.999828
Mpdz	-0.0323009	0.549907	1.22833	0.999828
Morc2a	0.208991	0.375661	1.14976	0.999828
Mon2	-0.312185	0.91448	1.09578	0.999828
Mob1a	-0.266344	0.83309	1.16576	0.999828
Mmtag2	-0.028571	0.588084	1.2216	0.999828
Mms19	0.0865543	0.530662	1.22726	0.999828
Mllt4	-0.330538	0.901419	1.11018	0.999828
Mlec	-0.331977	0.943538	1.06662	0.999828
Mkl2	-0.368422	0.961501	1.04426	0.999828
Mipep	0.14474	0.416678	1.17643	0.999828
Mios	-0.169109	0.724441	1.20754	0.999828
Mink1	0.151305	0.40922	1.17147	0.999828
Mier1	0.202586	0.385672	1.15101	0.999828
Mief1	0.270185	0.394532	1.15002	0.999828
Mid1	-0.171526	0.808072	1.16943	0.999828
Micu1	-0.245365	0.880974	1.13302	0.999828
Micall1	-0.53657	0.990726	1.01363	0.999828
Mical3	-0.220195	0.825456	1.16471	0.999828
Mic1	-0.106302	0.691591	1.22594	0.999828
Mia3	-0.517819	0.994685	1.0112	0.999828
Mgea5	-0.106355	0.730914	1.20369	0.999828
Mga	0.104834	0.439778	1.19475	0.999828
Mfn2	-0.25669	0.822279	1.16767	0.999828
Mff	-0.304371	0.922962	1.0896	0.999828
Mex3a	0.231291	0.354965	1.12719	0.999828
Mettl14	-0.0317561	0.647415	1.22379	0.999828
Mettl13	-0.234803	0.739061	1.20129	0.999828
Mepce	0.0872175	0.451547	1.20065	0.999828
Med29	0.333785	0.307504	1.08021	0.999828
Med27	-0.294992	0.860064	1.14982	0.999828
Med20	0.194519	0.379579	1.15439	0.999828
Med17	-0.0866701	0.705682	1.22157	0.999828
Mecp2	-0.207944	0.822363	1.16721	0.999828
Mecom	-0.382058	0.963589	1.04063	0.999828
Me1	-0.217478	0.836222	1.16279	0.999828
Mdn1	-0.120767	0.718794	1.21431	0.999828
Mdh2	-0.0293111	0.58429	1.22344	0.999828
Mdh1	0.047074	0.544487	1.23055	0.999828
Mcts1	-0.366279	0.960551	1.04678	0.999828
Mcmbp	0.288657	0.337853	1.11596	0.999828
Mcm8	0.354766	0.278002	1.051	0.999828
Mcm4	0.157044	0.405251	1.16824	0.999828
Mcfd2	-0.0792062	0.698619	1.22706	0.999828
Mbp	0.0208318	0.431116	1.18691	0.999828
Mbd2	-0.201293	0.746631	1.19669	0.999828
Maz	-0.237399	0.831171	1.16648	0.999828
Mau2	0.307749	0.299564	1.07596	0.999828
Mat2b	0.124722	0.471867	1.19714	0.999828
Mat2a	0.063426	0.495154	1.21653	0.999828
Mark2	-0.000586274	0.545133	1.22911	0.999828
Mark1	-0.179849	0.779285	1.17567	0.999828
Marcks	-0.575523	0.995508	1.0099	0.999828
Mapt	-0.145874	0.779439	1.17529	0.999828
Mapre3	0.0603436	0.534433	1.22515	0.999828
Mapre2	-1.04548	0.998253	1.00349	0.999828
Mapre1	-0.299145	0.908906	1.10195	0.999828
Mapkapk3	-0.089964	0.68865	1.2245	0.999828
Mapk9	-0.230645	0.715784	1.21709	0.999828
Mapk7	-0.280965	0.901692	1.10957	0.999828
Mapk1	0.185155	0.382069	1.15463	0.999828
Map4k5	0.15697	0.425139	1.18865	0.999828
Map4	-0.215441	0.837853	1.16001	0.999828
Map3k4	-0.0478811	0.66175	1.22592	0.999828
Map3k2	-0.253842	0.871991	1.13826	0.999828
Map2k7	0.266536	0.328271	1.10074	0.999828
Map2k3	-0.28644	0.869295	1.14043	0.999828
Map2k2	-0.118884	0.721957	1.21041	0.999828
Map2k1	-0.199503	0.810933	1.16945	0.999828
Map1b	-0.338827	0.943916	1.06663	0.999828
Map1a	0.134516	0.420076	1.18023	0.999828
Manf	-0.33791	0.920182	1.09215	0.999828
Malt1	-0.132068	0.728412	1.20439	0.999828
Magi3	-0.548593	0.993866	1.01144	0.999828
Maged2	-0.530706	0.978509	1.02969	0.999828
Maged1	-0.293339	0.900617	1.11253	0.999828
Maea	-0.11257	0.722672	1.2102	0.999828
Macrod1	-0.426117	0.979899	1.02814	0.999828
Macf1	0.0589581	0.508085	1.2151	0.999828
Lzts2	-0.186726	0.816976	1.16879	0.999828
Lzic	-0.197349	0.769483	1.17818	0.999828
Lyz1	0.460472	0.285125	1.06395	0.999828
Lyn	-0.433939	0.981891	1.02537	0.999828
Lyar	-0.286732	0.833593	1.1642	0.999828
Ltv1	-0.331585	0.942861	1.06712	0.999828
Ltn1	0.0706471	0.480328	1.2027	0.999828
Lta4h	-0.216176	0.830142	1.16617	0.999828
Lss	0.0659761	0.498436	1.21217	0.999828
Lsm6	0.28378	0.350598	1.12324	0.999828
Lsm14b	-0.125649	0.722961	1.20858	0.999828
Lsm14a	0.0717395	0.523625	1.22677	0.999828
Lsm12	-0.139575	0.729042	1.20405	0.999828
Lsg1	-0.201034	0.676965	1.22185	0.999828
Lrsam1	0.118563	0.433771	1.1874	0.999828
Lrrfip1	0.281727	0.318416	1.08799	0.999828
Lrrc59	-0.0174445	0.588458	1.22062	0.999828
Lrrc57	-0.340107	0.947748	1.05849	0.999828
Lrrc47	-0.243358	0.880245	1.13411	0.999828
Lrrc20	-0.322067	0.937028	1.0779	0.999828
Lrrc16a	-0.0610415	0.636274	1.2261	0.999828
Lrch2	-0.178025	0.79374	1.17227	0.999828
Lrba	-0.0453215	0.663041	1.22594	0.999828
Lonp2	-0.170231	0.710085	1.21892	0.999828
Lonp1	-0.0318945	0.575334	1.22975	0.999828
Loh12cr1	-0.107771	0.699623	1.22583	0.999828
Lnp	-0.186578	0.823482	1.16592	0.999828
Lmnb1	-0.485529	0.976754	1.03048	0.999828
Lmna	0.0599417	0.493985	1.21678	0.999828
Lmcd1	-0.458569	0.987143	1.01866	0.999828
Lman2	-0.458468	0.986836	1.01907	0.999828
Llgl1	0.165947	0.42677	1.18859	0.999828
Lin7a	-0.392585	0.964544	1.03893	0.999828
Lims1	-0.264131	0.890063	1.12509	0.999828
Letmd1	-0.244087	0.849413	1.15055	0.999828
Leprel2	-0.318377	0.92647	1.08617	0.999828
Ldhb	-0.129308	0.750985	1.19435	0.999828
Lbr	-0.422422	0.939078	1.07211	0.999828
Lasp1	0.00312648	0.54086	1.22814	0.999828
Las1l	-0.107685	0.743605	1.19986	0.999828
Lars2	-0.0479488	0.590923	1.22045	0.999828
Lars	-0.320836	0.835693	1.16318	0.999828
Larp4b	-0.231559	0.867668	1.14194	0.999828
Larp4	-0.284176	0.813679	1.17106	0.999828
Larp1	-0.0983097	0.709044	1.21932	0.999828
Lamtor2	-0.279409	0.789083	1.17201	0.999828
Lamc1	-0.464574	0.987104	1.01898	0.999828
Lamb1	-0.135859	0.741945	1.1992	0.999828
Lactb	-0.0854504	0.723082	1.20737	0.999828
L7rn6	0.0542658	0.579995	1.22335	0.999828
Ktn1	0.00240985	0.544754	1.22922	0.999828
Krt81	-0.286861	0.636004	1.2264	0.999828
Krt8	-0.584228	0.995404	1.01015	0.999828
Krt77	-0.36636	0.839701	1.15867	0.999828
Krt76	-0.475258	0.936223	1.07913	0.999828
Krt72	0.158643	0.399376	1.15944	0.999828
Krt7	-0.425992	0.564262	1.22612	0.999828
Krt35	0.23278	0.402494	1.16496	0.999828
Krt18	-0.679014	0.995678	1.00972	0.999828
Krt15	-0.403471	0.741506	1.19984	0.999828
Krt10	-0.324777	0.883602	1.13184	0.999828
Krr1	-0.316334	0.931549	1.08461	0.999828
Kras	-0.417107	0.978695	1.02913	0.999828
Kpnb1	-0.109298	0.735113	1.20234	0.999828
Kpna6	0.143233	0.440902	1.19555	0.999828
Kpna3	0.162796	0.402224	1.16536	0.999828
Kpna2	0.229362	0.358861	1.13082	0.999828
Kmt2d	-0.0954003	0.668258	1.22068	0.999828
Kmt2b	-0.34636	0.94732	1.06131	0.999828
Kmt2a	-0.218728	0.855004	1.14839	0.999828
Klc2	-0.41947	0.978202	1.02974	0.999828
Klc1	-0.386342	0.935895	1.08135	0.999828
Kifap3	0.209538	0.375936	1.14816	0.999828
Kif7	-0.140232	0.700911	1.22436	0.999828
Kif5c	-0.250543	0.691101	1.22659	0.999828
Kif5b	-0.118335	0.710502	1.21746	0.999828
Kif3b	-0.193254	0.829754	1.16677	0.999828
Kif3a	-0.366971	0.950869	1.05624	0.999828
Kif2c	0.264727	0.328388	1.09857	0.999828
Kif2a	0.173876	0.407263	1.16936	0.999828
Kif21a	0.069691	0.575828	1.22989	0.999828
Kif1c	-0.336683	0.902441	1.10859	0.999828
Kif1b	-0.0323655	0.545322	1.22762	0.999828
Kif1a	-0.258723	0.887864	1.12876	0.999828
Kidins220	-0.61657	0.998084	1.00402	0.999828
Kiaa1468	-0.0112492	0.574059	1.23343	0.999828
Kiaa0196	-0.233637	0.870628	1.13958	0.999828
Kiaa0100	-0.039584	0.631384	1.2257	0.999828
Kdsr	0.0893183	0.451601	1.19968	0.999828
Kdm7a	-0.243553	0.866549	1.14256	0.999828
Kdm5c	0.189487	0.377896	1.1517	0.999828
Kdm5a	0.385487	0.263284	1.02361	0.999828
Kdm3b	0.165973	0.411688	1.17502	0.999828
Kdm2a	0.287159	0.317363	1.09086	0.999828
Kdm1a	0.239278	0.345504	1.12065	0.999828
Kdelc1	-0.0281243	0.604109	1.22742	0.999828
Kctd15	-0.357195	0.955437	1.05479	0.999828
Kbp	-0.22899	0.865798	1.14472	0.999828
Katnb1	0.0882724	0.565992	1.2271	0.999828
Kat8	-0.264143	0.833646	1.16371	0.999828
Kars	-0.134229	0.739204	1.20084	0.999828
Jup	-0.314109	0.860748	1.14806	0.999828
Jmjd7	0.0902324	0.47564	1.19826	0.999828
Jak1	-0.284281	0.88965	1.12507	0.999828
Iws1	0.405031	0.255632	1.01582	0.999828
Itsn1	-0.238875	0.867883	1.1417	0.999828
Itpa	-0.113611	0.692499	1.22604	0.999828
Itih2	-0.0557481	0.602193	1.22873	0.999828
Itgb1	0.0365366	0.505715	1.21346	0.999828
Itga6	0.001501	0.557863	1.22798	0.999828
Itch	0.0133824	0.580893	1.22255	0.999828
[truncated: 878 more rows]
